# Supplementary material for: Genomic insights into the recent chromosome reduction and polyploidization of complex autopolyploid sugarcane S. spontaneum
Source: Research Square preprint supplement (doi:10.21203/rs.3.rs-494691/v1), 2021-05-14
Supplement: Supplementary file 1 [file 0387ebf489904e32961c876e.xlsx]

## Sheet: Sheet1
The information of the C4 enzyme genes and their non-C4 isoforms genes of Saccharum spontaneum(Nepal 2013-6)
Gene name	Representative allele	A	B	C	D
NppCA1*	Npp.03C022280.1	Npp.03A021910.1		Npp.03C021910.1|Npp.03C022280.1	Npp.03D022730.1
NppCA2*	Npp.03A021920.1	Npp.03A021920.1		Npp.03C021920.1|Npp.03C022290.1	Npp.03D022720.1
NppCA3	Npp.03C021920.2	Npp.03A021920.2		Npp.03C021920.2|Npp.03C022290.2	Npp.03D022720.2
NppCA4	Npp.03A021930.1	Npp.03A021930.1			Npp.03D022710.1
NppEPC1*	Npp.10A014060.1	Npp.10A014060.1	Npp.10B015030.1	Npp.10C012700.1
NppEPC2	Npp.02C017520.1	Npp.02A014050.1|Npp.02A014260.1	Npp.02B014820.1	Npp.02C017520.1
NppEPC3	Npp.03C028320.1	Npp.03A026360.1	Npp.03B026330.1	Npp.03C028320.1|Npp.03C028600.1
NppEPC4	Npp.04A013350.1	Npp.04A013350.1	Npp.04B009370.1	Npp.04C009930.1|Npp.04C009980.1
NppEPC5	Npp.07B014690.1	Npp.07A011710.1	Npp.07B014690.1	Npp.07C010830.1|Npp.07C009940.1
NppEPC-k1*	Npp.04B030200.1	Npp.04A036220.1	Npp.04B030200.1		Npp.04D025930.1
NppEPC-k2	Npp.04B019480.1	Npp.04A023810.1|Npp.04A023890.1	Npp.04B019300.1|Npp.04B019480.1
NppEPC-k3	Npp.06B014490.1		Npp.06B014490.1	Npp.06C016100.1	Npp.06D014350.1
NppNADP-MDH1	Npp.07C016530.1		Npp.07B019360.1	Npp.07C016530.1	Npp.07D014790.1
NppNADP-MDH2*	Npp.07D014800.1			Npp.07C016530.2	Npp.07D014800.1
NppNADP-ME1	Npp.03D002980.1		Npp.03B002870.1	Npp.03C002360.1	Npp.03D002980.1|Npp.03D003170.1
NppNADP-ME2*	Npp.03D002990.1		Npp.03B002880.1	Npp.03C002400.1	Npp.03D002990.1|Npp.03D003180.1
NppNADP-ME3	Npp.03C027450.1		Npp.03B025570.1	Npp.03C027450.1	Npp.03D027500.1
NppNADP-ME4	Npp.09D007600.1	Npp.09A007530.1		Npp.09C007950.1	Npp.09D007600.1
NppNADP-ME5	Npp.03C026470.1	Npp.03A025190.1	Npp.03B024390.1	Npp.03C026470.1
NppNADP-ME6	Npp.09B011130.1	Npp.09A011980.1	Npp.09B011130.1	Npp.09C011480.1	Npp.09D012000.1
NppPDK1*	Npp.09A013470.1	Npp.09A013470.1			Npp.09D014620.1
NppPDK2	Npp.01B032990.1	Npp.01A032760.1	Npp.01B032990.1|Npp.01B033340.1		Npp.01D020650.1
NppPDK-RP1a*	Npp.02C031010.1	Npp.02A025530.1		Npp.02C031010.1	Npp.02D039370.1
NppPDK-RP1b*	Npp.04B028880.1		Npp.04B028880.1
NppPDK-RP2a	Npp.02C031020.1	Npp.02A025540.4		Npp.02C031020.1	Npp.02D039380.1
NppPDK-RP2b	Npp.04B028860.1		Npp.04B028860.1
NppPDK-RP3a	Npp.02C031040.1	Npp.02A025550.1		Npp.02C031040.1	Npp.02D039400.1
NppPDK-RP3b	Npp.04B028840.1		Npp.04B028840.1
NppEPCK	Npp.01C037370.1	Npp.01A019400.1	Npp.01B043550.1	Npp.01C037370.1
NppNAD-ME1	Npp.02C029720.1	Npp.02A022830.1|Npp.02A022810.1	Npp.02B028680.1	Npp.02C029720.1	Npp.02D030440.1
NppNAD-ME2	Npp.01C015670.1	Npp.01A020120.1		Npp.01C015670.1	Npp.01D007820.1|Npp.01D002210.1
* represent C4 gene	If two or more Saccharum spontaneum(Nepal 2013-6) genes distributed on different chromosomes were equally close to a single sorghum bicolor gene, then the same name was used followed by the letters “a”, “b”

## Sheet: Sheet2
Amino acid sequence similarity between Saccharum spontaneum Np-X and Saccharum spontaneum AP85-441 , Miscanthus sinensis, Sorghum bicolor
Saccharum spontaneum Np-X	Representative allele gene ID	Miscanthus sinensis	gene ID	Saccharum spontaneum AP85-441	Representative allele gene ID	Sorghum bicolor	gene ID	% identity	% identity	% identity
								Npp vs Ms	Npp vs Ss	Npp vs Sb
NppCA1*	Npp.03C022280.1	MsCA1a/b*	Misin06G212500/Misin05G238400	SsCA1*	Sspon.003C0020330	SbCA1*	Sobic.003G234200	97.78/96.02	87.02	90.57
NppCA2*	Npp.03A021920.1	MsCA2a/b/c*	Misin05G238300/Misin06G212300/Misin09G079000	SsCA2*	Sspon.003C0020320	SbCA2*	Sobic.003G234400	99.02/98.54/94.03	99.51	96.1
NppCA3	Npp.03C021920.2	MsCA3a/b	Misin06G212200/Misin05G238100	SsCA3	Sspon.003B0015790	SbCA3	Sobic.003G234500	99.01/99.01	96.99	98.03
NppCA4	Npp.03A021930.1	MsCA4a/b	Misin06G212100/Misin05G238000	SsCA4	Sspon.003B0015800	SbCA4	Sobic.003G234600	97.1/96.95	95.85	96.15
NppEPC1*	Npp.10A014060.1	MsPEPC1a/b*	Misin19G154100/Misin18G159600	SsPEPC1*	Sspon.008A0009990	SbPEPC1*	Sobic.010G160700	97.51/97.51	97.19	96.67
NppEPC2	Npp.02C017520.1	MsPEPC2	Misin03G139300	SsPEPC2	Sspon.002C0022221	SbPEPC2	Sobic.002G167000	97.62	99.9	99.17
NppEPC3	Npp.03C028320.1	MsPEPC3a/b	Misin05G277200/Misin06G268600	SsPEPC3	Sspon.003C0015360	SbPEPC3	Sobic.003G301800	99.17/97.43	95.54	98.97
NppEPC4	Npp.04A013350.1	NA	NA	SsPEPC4	Sspon.004D0019501	SbPEPC4	Sobic.004G106900	NA	99.9	99.48
NppEPC5	Npp.07B014690.1	MsPEPC5a/b	Misin13G093300/Misin07G325900	SsPEPC5	Sspon.006C0010170	SbPEPC5	Sobic.007G106500	98.54/98.33	98.85	98.85
NppEPC-k1*	Npp.04B030200.1	MsPEPC-k1a/b*	Misin07G533800/Misin08G317900	SsPEPC-k1*	Sspon.004D0002690	SbPEPC-k1*	Sobic.004G338000	97.86/97.52	99.25	96.79
NppEPC-k2	Npp.04B019480.1	MsPEPC-k2a/b	Misin07G411800/Misin08G206600	SsPEPC-k2	Sspon.004B0009111	SbPEPC-k2	Sobic.004G219900	96.42/96.04	99.01	93.18
NppEPC-k3	Npp.06B014490.1	MsPEPC-k3a/b	Misin11G144500/Misin12G149800	SsPEPC-k3	Sspon.005C0005400	SbPEPC-k3	Sobic.006G148300	94.39/94.22	97.81	96.77
NppNADP-MDH1	Npp.07C016530.1	MsNADP-MDH1a/b	Misin13G145200/Misin07G271500	SsNADP-MDH1	Sspon.006D0005110	SbNADP-MDH1	Sobic.007G166200	97.51/82.35	81.28	96.82
NppNADP-MDH2*	Npp.07D014800.1	MsNADP-MDH2a/b*	Misin13G145300/Misin07G271600	SsNADP-MDH2*	Sspon.006D0004990	SbNADP-MDH2*	Sobic.007G166300	98.39/98.39	96	96.77
NppNADP-ME1	Npp.03D002980.1	MsNADP-ME1a/b	Misin05G037600/Misin06G026800	SsNADP-ME1	Sspon.003C0036192	SbNADP-ME1	Sobic.003G036000	97.38/95.23	77.74	83.64
NppNADP-ME2*	Npp.03D002990.1	MsNADP-ME2a/b*	Misin05G037500/Misin06G032000	SsNADP-ME2*	Sspon.003B0032970	SbNADP-ME2*	Sobic.003G036200	99.21/98.74	83.57	98.43
NppNADP-ME3	Npp.03C027450.1	MsNADP-ME3a/b	Misin06G253000/Misin05G273100	SsNADP-ME3	Sspon.003A0008210	SbNADP-ME3	Sobic.003G292400	98.93/96.97	96.68	98.65
NppNADP-ME4	Npp.09D007600.1	MsNADP-ME4a/b/c/d	Misin16G080600/Misin17G084000/MisinT236000/Misin04G147800	SsNADP-ME4	Sspon.007D0012940	SbNADP-ME4	Sobic.009G069600	98.77/98.6/89.35/80.42	99.47	97.2
NppNADP-ME5	Npp.03C026470.1	MsNADP-ME5a/b	Misin05G251700/Misin06G234900	SsNADP-ME5	Sspon.003A0008980	SbNADP-ME5	Sobic.003G280900	99.66/99.33	96.3	99.66
NppNADP-ME6	Npp.09B011130.1	NA	NA	SsNADP-ME6	Sspon.007C0010990	SbNADP-ME6	Sobic.009G108700	NA	88.25	95.71
NppPDK1*	Npp.09A013470.1	MsPPDK1a/b*	Misin17G136200/Misin16G135700	SsPPDK1*	Sspon.007A0010811	SbPPDK1*	Sobic.009G132900	99.16/99.05	99.27	98.52
NppPDK2	Npp.01B032990.1	MsPPDK2	MisinT543000	SsPPDK2	Sspon.001C0014951	SbPPDK2	Sobic.001G326900	98.51	99.86	97.36
NppPDK-RP1*	Npp.02C031010.1	MsPPDK-RP1a/b*	Misin04G307000/Misin03G283200	SsPPDK-RP1*	Sspon.002A0008810	SbPPDK-RP1*	Sobic.002G324400	96.92/95.96	98.64	91
NppPDK-RP2	Npp.02C031020.1	MsPPDK-RP2	Misin04G307100	SsPPDK-RP2	Sspon.002B0007451	SbPPDK-RP2	Sobic.002G324500	98.56	98.8	95.95
NppPDK-RP3	Npp.04B028840.1	MsPPDK-RP3a/b	Misin04G307200/Misin03G283400	SsPPDK-RP3	Sspon.002D0005590	SbPPDK-RP3	Sobic.002G324700	95.88/94.33	100	91.07
NA	NA	NA	NA	SsPEPCK1	Sspon.001B0013950	NA	NA	NA	NA	NA
NppEPCK	Npp.01C037370.1	MsPEPCKa/b	Misin01G412200/Misin02G396200	SsPEPCK2	Sspon.001A0020841	SbPEPCK	Sobic.001G432800	99.24/98.64	95.64	99.09
NppNAD-ME1	Npp.02C029720.1	MsNAD-ME1a/b	Misin04G292200/Misin03G269800	SsNAD-ME1	Sspon.002C0010890	SbNAD-ME1	Sobic.002G309400	98.82/98.58	100	99.53
NppNAD-ME2	Npp.01C015670.1	MsNAD-ME2a/b	Misin01G184700/Misin02G171900	SsNAD-ME2	Sspon.001C0025371	SbNAD-ME2	Sobic.001G201700	98.7/98.37	93.49	99.02
* represent C4 gene	If two or more Miscanthus sinensis genes were equally close to a single sorghum bicolor gene, then the same name was used followed by the letters “a”, “b”, “c” and “d”
