# Supplementary material for: Genomic insights into the recent chromosome reduction and polyploidization of complex autopolyploid sugarcane S. spontaneum
Source: Research Square preprint supplement (doi:10.21203/rs.3.rs-494691/v1), 2021-05-14
Supplement: Supplementary file 4 [file 8899dbde1df8b6cfff560101.xlsx]

## Sheet: Sheet1
Gene alleles in Np-X	Orthologs in AP85-441 genome	Orthologs in Sorghum genome	Description
Npp.09C004230.1	Sspon.07G0013620-4D	Sobic.009G037200.1.p	transferase family protein, putative, expressed
Npp.09C004240.1	Sspon.07G0013610-1A	Sobic.009G037200.1.p	transferase family protein, putative, expressed
Npp.07C009270.1	Sspon.08G0016120-3D	Sobic.008G096050.1.p	retrotransposon protein, putative, Ty3-gypsy subclass
Npp.09C004210.1	Sspon.07G0026730-1B	Sobic.009G037000.1.p	agenet domain containing protein, putative, expressed
Npp.10D024140.1	Sspon.08G0003430-4D	Sobic.010G235000.1.p	external NADH-ubiquinone oxidoreductase 1, mitochondrial precursor, putative, expressed
Npp.09C004220.1	Sspon.07G0013660-3D	Sobic.009G037100.1.p	oxidoreductase, short chain dehydrogenase/reductase family protein, putative, expressed
Npp.09C004270.1	Sspon.06G0016050-3D	-
Npp.09C004280.1	Sspon.07G0020450-2B	Sobic.008G073000.1.p	transposon protein, putative, CACTA, En/Spm sub-class, expressed
Npp.02C017570.1	Sspon.02G0016790-2D	Sobic.002G166150.1.p	OsWAK112d - OsWAK receptor-like protein kinase, expressed
Npp.02C017560.1	Sspon.07G0019290-2B	Sobic.002G166150.1.p	OsWAK112d - OsWAK receptor-like protein kinase, expressed
Npp.02D009450.1	Sspon.02G0021670-1A	Sobic.002G087500.1.p	GO:0030598,GO:0017148
Npp.05D006060.1	Sspon.05G0019360-1A	Sobic.005G057700.1.p	expressed protein
Npp.02C017550.1	Sspon.02G0016790-2D	Sobic.002G166150.1.p	OsWAK112d - OsWAK receptor-like protein kinase, expressed
Npp.02D009460.1	Sspon.02G0021670-1A	Sobic.002G087500.1.p	GO:0030598,GO:0017148
Npp.05D006090.1	Sspon.05G0017860-1A	Sobic.005G057700.1.p	expressed protein
Npp.05D006100.1	Sspon.05G0018350-1A	Sobic.003G134800.1.p	coatomer subunit beta-1, putative, expressed
Npp.05D006070.1	Sspon.05G0018340-1A	Sobic.005G057700.1.p	expressed protein
Npp.05D006080.1	Sspon.05G0018340-1A	Sobic.005G057700.1.p	expressed protein
Npp.02A031040.1	Sspon.02G0002970-1A	Sobic.002G383700.1.p	4-alpha-glucanotransferase, chloroplast precursor, putative, expressed
Npp.02A031030.1	Sspon.02G0002960-1A	Sobic.002G383600.1.p	zinc finger, C3HC4 type domain containing protein, expressed
Npp.02A031020.1	Sspon.02G0046970-2D	Sobic.002G383500.1.p	expressed protein
Npp.02A031010.1	Sspon.02G0046980-1P	Sobic.002G383400.1.p	amine oxidase family protein, putative, expressed
Npp.02A031000.1	Sspon.03G0026310-1P	Sobic.002G383300.2.p	MYST-like histone acetyltransferase 1, putative, expressed
Npp.02A030990.1	Sspon.02G0033710-2C	Sobic.002G383100.1.p	expressed protein
Npp.02A030980.1	Sspon.02G0004920-1A	Sobic.005G117801.1.p	expressed protein
Npp.02A030970.1	Sspon.02G0033770-1P	Sobic.002G382700.1.p	heat shock protein DnaJ, putative, expressed
Npp.02A031060.1	Sspon.02G0002980-2B	Sobic.002G383800.1.p	GTP-binding protein, putative, expressed
Npp.02A031050.1	-	-
Npp.10D014870.1	-	-
Npp.10D014880.1	Sspon.04G0025930-2D	Sobic.004G152200.1.p	glycosyltransferase, putative, expressed
Npp.09D001300.1	Sspon.07G0015750-2C	Sobic.009G009400.1.p	expressed protein
Npp.09D001290.1	Sspon.07G0015750-2C	Sobic.009G009400.1.p	expressed protein
Npp.10D014830.1	Sspon.02G0035420-1B	Sobic.006G060601.1.p	Sobic.006G060601.1.p
Npp.10D014840.1	Sspon.02G0053020-1C	-
Npp.08A007880.1	Sspon.01G0019720-1A	Sobic.001G145400.1.p	threonyl-tRNA synthetase, mitochondrial precursor, putative, expressed
Npp.08A007890.1	Sspon.08G0017680-1B	Sobic.001G145400.1.p	threonyl-tRNA synthetase, mitochondrial precursor, putative, expressed
Npp.08A007860.1	Sspon.01G0019700-3D	Sobic.001G216300.1.p	glutaredoxin domain containing protein, putative, expressed
Npp.08A007870.1	Sspon.01G0019710-2B	Sobic.001G216200.1.p	transcription factor BTF3, putative, expressed
Npp.08A007920.1	Sspon.01G0019770-2B	Sobic.001G215600.3.p	cytokinin dehydrogenase precursor, putative, expressed
Npp.10D014810.1	Sspon.08G0026850-1C	-
Npp.08A007900.1	Sspon.01G0019730-4D	Sobic.001G216100.1.p	expressed protein
Npp.08A007910.1	Sspon.01G0019740-1A	Sobic.001G215900.2.p	TKL_IRAK_DUF26-lf.4 - DUF26 kinases have homology to DUF26 containing loci, expressed
Npp.10D014820.1	Sspon.03G0018750-1P	Sobic.003G233800.1.p	retrotransposon protein, putative, unclassified, expressed
Npp.08A007840.1	Sspon.01G0019650-1T	Sobic.001G216500.1.p	nodulin, putative, expressed
Npp.08A007850.1	Sspon.01G0019650-2B	Sobic.001G216400.1.p	nodulin, putative, expressed
Npp.09A011830.1	-	-
Npp.09A011840.1	Sspon.07G0009840-1A	Sobic.009G107400.1.p	mitochondrial carrier protein, putative, expressed
Npp.09A011850.1	Sspon.07G0036140-1D	Sobic.009G107500.2.p	PAR1 protein
Npp.03C027010.1	Sspon.03G0006960-1A	Sobic.003G288800.1.p	phosphoesterase, putative, expressed
Npp.08A010060.1	Sspon.02G0027530-2B	Sobic.008G104300.1.p	OsFBX164 - F-box domain containing protein, expressed
Npp.08A010070.1	Sspon.02G0027550-1P	Sobic.008G104500.1.p	ureide permease, putative, expressed
Npp.08A010080.1	Sspon.02G0060010-1D	Sobic.008G106100.1.p	ureide permease, putative, expressed
Npp.03D021470.1	Sspon.03G0032300-2C	Sobic.003G226700.1.p	kinesin motor domain containing protein, putative, expressed
Npp.03D021480.1	Sspon.03G0032290-1B	Sobic.003G226900.1.p	aspartic proteinase nepenthesin-2 precursor, putative, expressed
Npp.03D021490.1	Sspon.03G0006000-1A	Sobic.003G227000.1.p	DUF623 domain containing protein, expressed
Npp.03D021500.1	Sspon.03G0005990-2D	Sobic.003G227100.1.p	adaptin, putative, expressed
Npp.03D021510.1	Sspon.03G0005960-1T	Sobic.003G227200.1.p	mitochondrial import receptor subunit TOM7-1, putative, expressed
Npp.03D021520.1	-	-
Npp.09A011870.1	Sspon.01G0034070-2D	Sobic.005G193900.1.p	DNA binding protein, putative, expressed
Npp.09A011880.1	Sspon.02G0023750-2B	Sobic.009G107500.2.p	PAR1 protein
Npp.08D003690.1	Sspon.07G0016570-1A	Sobic.008G033000.1.p	CAAX amino terminal protease family protein, putative, expressed
Npp.08D003700.1	Sspon.08G0004440-4D	Sobic.010G217400.2.p	STRUBBELIG-RECEPTOR FAMILY 3 precursor, putative, expressed
Npp.09A011890.1	Sspon.07G0024640-2C	Sobic.009G108300.1.p	inhibitor I family protein, putative, expressed
Npp.08D003750.1	Sspon.05G0020300-3D	Sobic.005G026900.1.p	Rf1, mitochondrial precursor, putative, expressed
Npp.08D003760.1	Sspon.07G0018300-3C	-
Npp.08D003770.1	Sspon.07G0028900-1B	Sobic.008G033500.1.p	nucleolar GTPase, putative, expressed
Npp.08D003780.1	Sspon.05G0019670-2B	Sobic.008G033600.1.p	pyruvate kinase, putative, expressed
Npp.08D003710.1	Sspon.07G0028890-2D	Sobic.008G033200.1.p	stem-specific protein TSJT1, putative, expressed
Npp.08D003720.1	Sspon.05G0020230-2B	Sobic.002G361500.1.p	OsGH3.8 - Probable indole-3-acetic acid-amido synthetase, expressed
Npp.08D003730.1	Sspon.07G0018290-2B	Sobic.008G033300.1.p	sodium/calcium exchanger protein, putative, expressed
Npp.08D003740.1	Sspon.07G0018300-4D	Sobic.008G033400.1.p	powdery mildew resistant protein 5, putative, expressed
Npp.07C010810.1	Sspon.01G0007320-1A	Sobic.001G373500.2.p	BTBN6 - Bric-a-Brac, Tramtrack, Broad Complex BTB domain with non-phototropic hypocotyl 3 NPH3 and coiled-coil domains, expressed
Npp.07C009250.1	Sspon.03G0038120-1C	-	expressed protein
Npp.07C010820.1	Sspon.02G0041530-1B	Sobic.010G096600.1.p	transposon protein, putative, Pong sub-class, expressed
Npp.04D006550.1	Sspon.04G0015660-2B	Sobic.004G081701.1.p	expressed protein
Npp.03D031950.1	Sspon.03G0003790-1A	Sobic.003G337400.1.p	cytochrome P450, putative, expressed
Npp.07C010850.1	Sspon.06G0007360-4D	Sobic.007G106400.1.p	endothelial differentiation-related factor 1, putative, expressed
Npp.07C010860.1	Sspon.06G0029630-1C	Sobic.007G106300.1.p	nucleobase-ascorbate transporter, putative, expressed
Npp.06C012350.1	Sspon.01G0041720-1B	Sobic.006G107332.1.p	expressed protein
Npp.06C012340.1	Sspon.05G0032560-2D	Sobic.006G106600.1.p	arsenical pump-driving ATPase, putative, expressed
Npp.06C012370.1	Sspon.05G0009940-3D	Sobic.006G106300.1.p	helicase conserved C-terminal domain containing protein, expressed
Npp.06C012360.1	Sspon.05G0009950-1P	Sobic.006G106400.1.p	OsDegp5 - Putative Deg protease homologue, expressed
Npp.06C012390.1	Sspon.05G0025430-3D	Sobic.006G106000.2.p	RAN guanine nucleotide release factor, putative, expressed
Npp.06C012380.1	Sspon.04G0009800-1P	Sobic.006G106200.1.p	NAP domain containing protein, putative, expressed
Npp.06C012410.1	Sspon.05G0009970-2D	Sobic.006G105800.1.p	tyrosyl-tRNA synthetase, putative, expressed
Npp.06C012400.1	Sspon.05G0032580-2D	Sobic.006G105900.1.p	glyceraldehyde-3-phosphate dehydrogenase, putative, expressed
Npp.07B008390.1	Sspon.06G0022720-2P	Sobic.007G050000.1.p	tetraspanin family protein, putative, expressed
Npp.06C012330.1	Sspon.05G0038010-1D	Sobic.010G233500.1.p	thiol protease SEN102 precursor, putative, expressed
Npp.06C012320.1	Sspon.05G0009930-1P	Sobic.006G106700.1.p	transmembrane amino acid transporter protein, putative, expressed
Npp.01B019930.1	Sspon.01G0022630-2B	Sobic.001G178500.1.p	chloroplast 30S ribosomal protein S19, putative
Npp.01B019940.1	Sspon.01G0022650-2B	Sobic.001G178400.1.p	tRNA synthetases class II domain containing protein, expressed
Npp.01B019850.1	Sspon.01G0044970-1B	Sobic.001G179300.1.p	dof zinc finger domain containing protein, putative, expressed
Npp.01B019860.1	Sspon.01G0022590-2C	Sobic.001G179200.2.p	expressed protein
Npp.01B019870.1	Sspon.01G0044940-2D	Sobic.001G179100.1.p	chloroplast post-illumination chlorophyll fluorescence increase protein, putative, expressed
Npp.01B019880.1	Sspon.01G0022610-3C	Sobic.002G129200.1.p	DNA-directed RNA polymerase subunit, putative, expressed
Npp.01B019890.1	Sspon.01G0022620-1P	Sobic.001G178600.2.p	metal ion binding protein, putative, expressed
Npp.01B019900.1	Sspon.01G0022630-1P	Sobic.001G178500.1.p	chloroplast 30S ribosomal protein S19, putative
Npp.01B019910.1	Sspon.01G0022640-1T	Sobic.010G127300.1.p	lectin-like receptor kinase, putative, expressed
Npp.01B019920.1	Sspon.01G0022630-1P	Sobic.001G178500.1.p	chloroplast 30S ribosomal protein S19, putative
Npp.03B005580.1	Sspon.06G0024310-1B	Sobic.003G066500.1.p	expressed protein
Npp.03B005570.1	Sspon.05G0004620-2B	Sobic.006G192900.1.p	protein kinase domain containing protein, expressed
Npp.03B005560.1	Sspon.05G0004620-1A	Sobic.006G192900.1.p	protein kinase domain containing protein, expressed
Npp.03B005550.1	Sspon.03G0020920-1A	Sobic.003G065600.2.p	gibberellin receptor GID1L2, putative, expressed
Npp.03B005540.1	Sspon.03G0020930-1A	Sobic.003G065600.2.p	gibberellin receptor GID1L2, putative, expressed
Npp.03B005530.1	Sspon.03G0020940-3D	Sobic.003G065400.1.p	gibberellin receptor GID1L2, putative, expressed
Npp.03B005520.1	Sspon.03G0020950-2B	Sobic.003G065300.1.p	gibberellin receptor GID1L2, putative, expressed
Npp.03B005510.1	Sspon.02G0024420-2B	Sobic.002G042100.1.p	gibberellin receptor GID1L2, putative, expressed
Npp.03B005600.1	Sspon.03G0020910-2B	Sobic.003G065700.1.p	expressed protein
Npp.03B005590.1	Sspon.03G0020890-1A	Sobic.003G065800.1.p	expressed protein
Npp.02D039740.1	Sspon.03G0014440-1A	Sobic.003G159200.1.p	poly synthetase 2-A, putative, expressed
Npp.02D039730.1	Sspon.06G0021590-2C	Sobic.002G385700.2.p	lactate/malate dehydrogenase, putative, expressed
Npp.02C035380.1	Sspon.03G0005530-3D	Sobic.006G038901.1.p	radical SAM enzyme, putative, expressed
Npp.01A010100.1	Sspon.01G0027410-2C	Sobic.001G110900.1.p	MYB family transcription factor, putative, expressed
Npp.03C026090.1	Sspon.03G0007600-3C	Sobic.003G278700.1.p	heavy metal-associated domain containing protein, expressed
Npp.05D021730.1	Sspon.06G0035600-1D	Sobic.005G220200.1.p	NBS-LRR disease resistance protein, putative, expressed
Npp.03A037620.1	Sspon.03G0026060-2C	Sobic.003G433500.1.p	transposon protein, putative, CACTA, En/Spm sub-class, expressed
Npp.03A037630.1	Sspon.03G0037970-1C	Sobic.003G433600.1.p	pentatricopeptide, putative, expressed
Npp.02D039820.1	Sspon.03G0014340-2B	Sobic.003G160200.1.p	multidrug resistance-associated protein, putative, expressed
Npp.02D039810.1	Sspon.03G0014390-2B	Sobic.003G160000.1.p	SUMO protease, putative, expressed
Npp.02D039800.1	Sspon.03G0014400-2B	Sobic.003G159700.1.p	ATKINESIN-13A/KINESIN-13A, putative, expressed
Npp.02D039790.1	Sspon.03G0014410-1A	Sobic.003G159600.1.p	auxilin, putative, expressed
Npp.01A000790.1	Sspon.01G0033620-1P	Sobic.001G003900.1.p	pentatricopeptide, putative, expressed
Npp.01A000780.1	Sspon.01G0033630-1P	Sobic.001G003700.1.p	MATE efflux family protein, putative, expressed
Npp.02D039760.1	Sspon.03G0033980-1B	-
Npp.02D039750.1	Sspon.06G0028420-1C	Sobic.008G069100.1.p	transposon protein, putative, CACTA, En/Spm sub-class, expressed
Npp.09B003560.1	Sspon.07G0014610-3C	Sobic.009G025400.2.p	retrotransposon protein, putative, unclassified, expressed
Npp.09A025440.1	Sspon.07G0000520-1A	Sobic.005G095900.1.p	cysteine-rich receptor-like protein kinase 21 precursor, putative, expressed
Npp.07B008380.1	Sspon.06G0030420-1C	Sobic.007G049900.3.p	MYB family transcription factor, putative, expressed
Npp.06A020600.1	Sspon.05G0001920-1A	Sobic.006G245500.1.p	AP2-like ethylene-responsive transcription factor AINTEGUMENTA, putative, expressed
Npp.06A020590.1	Sspon.05G0001910-2B	Sobic.006G245400.1.p	NADPH reductase, putative, expressed
Npp.03D030000.1	Sspon.06G0020080-1B	Sobic.003G321101.1.p	nuclear transport factor, putative, expressed
Npp.03D029990.1	Sspon.03G0004530-3C	Sobic.003G321000.1.p	OsPOP4 - Putative Prolyl Oligopeptidase homologue, expressed
Npp.03D029980.1	Sspon.08G0023000-1B	Sobic.010G061700.1.p	jp18, putative, expressed
Npp.03D029970.1	Sspon.03G0004500-3C	Sobic.003G320800.1.p	peroxidase precursor, putative, expressed
Npp.03D030040.1	Sspon.03G0040540-1C	Sobic.003G321500.1.p	Homeobox domain containing protein, expressed
Npp.03D030030.1	Sspon.03G0040560-1C	Sobic.003G321400.1.p	plastocyanin-like domain containing protein, putative, expressed
Npp.03D030020.1	Sspon.03G0030460-1B	Sobic.003G321300.1.p	disease resistance protein RPS2, putative, expressed
Npp.03D030010.1	Sspon.02G0001110-2B	Sobic.003G321200.1.p	pectinesterase, putative, expressed
Npp.03D030060.1	Sspon.03G0030450-2C	Sobic.003G321700.1.p	KH domain containing protein, putative, expressed
Npp.03D030050.1	Sspon.03G0031660-1B	Sobic.003G321600.1.p	PPR repeat domain containing protein, putative, expressed
Npp.02C033410.1	Sspon.02G0037030-2C	Sobic.002G251300.1.p	uroporphyrinogen-III synthase, putative, expressed
Npp.02C033400.1	Sspon.02G0049170-2D	Sobic.002G251400.1.p	expressed protein
Npp.02B022720.1	Sspon.02G0011270-3C	Sobic.002G251900.1.p	chaperone protein dnaJ 10, putative, expressed
Npp.10C011390.1	Sspon.08G0021150-3D	Sobic.010G136300.1.p	osMFT1 MFT-Like1 homologous to Mother of FT and TFL1 gene; contains Pfam profile PF01161: Phosphatidylethanolamine-binding protein, expressed
Npp.10C011380.1	Sspon.08G0008870-1A	Sobic.010G136200.1.p	oxidoreductase/ transition metal ion binding protein, putative, expressed
Npp.01B038750.1	Sspon.01G0008940-1A	Sobic.001G382800.1.p	ABC transporter, ATP-binding protein, putative, expressed
Npp.01B038740.1	Sspon.01G0008950-3D	Sobic.001G382700.3.p	inactive receptor kinase At2g26730 precursor, putative, expressed
Npp.01B038730.1	Sspon.01G0008960-3D	Sobic.001G382600.1.p	expressed protein
Npp.01B038720.1	Sspon.01G0008970-2B	Sobic.001G382500.1.p	AARP2CN domain containing protein, expressed
Npp.01B038710.1	Sspon.01G0008980-1A	Sobic.001G382400.1.p	TKL_IRAK_CrRLK1L-1.5 - The CrRLK1L-1 subfamily has homology to the CrRLK1L homolog, expressed
Npp.01B038700.1	Sspon.01G0038130-1B	Sobic.001G382200.1.p	eukaryotic translation initiation factor 2 subunit beta, putative, expressed
Npp.01B038690.1	Sspon.01G0008990-1A	Sobic.001G382100.1.p	photosystem II 11 kD protein, putative, expressed
Npp.01B038680.1	Sspon.01G0009000-2B	Sobic.001G382000.1.p	AGC_AGC_other_RS6K_like.1 - ACG kinases include homologs to PKA, PKG and PKC, expressed
Npp.07B012220.1	Sspon.06G0008740-2B	Sobic.007G084100.1.p	expressed protein
Npp.09C001690.1	Sspon.07G0015880-1A	Sobic.008G036400.1.p	expressed protein
Npp.01C007460.1	Sspon.01G0028500-2B	Sobic.001G085450.1.p	DUF292 domain containing protein, expressed
Npp.01A037800.1	Sspon.01G0009700-2D	Sobic.001G373700.1.p	CW-type Zinc Finger, putative, expressed
Npp.01C007480.1	Sspon.01G0049320-1B	Sobic.001G085600.1.p	ABC transporter, ATP-binding protein, putative, expressed
Npp.01C007470.1	Sspon.01G0028510-1A	Sobic.001G085500.1.p	NLI interacting factor-like phosphatase, putative, expressed
Npp.02A019230.1	Sspon.02G0012630-1P	Sobic.002G233700.1.p	citrate transporter, putative, expressed
Npp.02A019220.1	Sspon.02G0012620-3D	Sobic.002G233600.1.p	glycogen operon protein glgX, putative, expressed
Npp.02D021520.1	Sspon.02G0014040-2C	Sobic.002G213300.1.p	CAAX amino terminal protease family protein, putative, expressed
Npp.02A019240.1	Sspon.02G0012640-1P	Sobic.002G233800.1.p	homeobox associated leucine zipper, putative, expressed
Npp.03A000940.1	Sspon.03G0037440-2D	Sobic.003G007500.3.p	CK1_CaseinKinase_1.1 - CK1 includes the casein kinase 1 kinases, expressed
Npp.03A000950.1	Sspon.03G0044020-2D	Sobic.008G140050.1.p	OsFBX286 - F-box domain containing protein, expressed
Npp.02D021480.1	Sspon.02G0037730-2D	Sobic.002G213100.2.p	zinc finger, C3HC4 type family protein, expressed
Npp.02D021470.1	Sspon.02G0037740-1B	Sobic.002G212400.1.p	zinc finger, C3HC4 type family protein, expressed
Npp.08B015180.1	Sspon.02G0044670-2C	Sobic.008G184400.1.p	aspartic proteinase, putative, expressed
Npp.08A004040.1	Sspon.05G0029550-1B	Sobic.007G045600.1.p	MSP domain containing protein, expressed
Npp.08C004070.1	Sspon.07G0018350-2B	Sobic.008G034400.1.p	ATP-dependent RNA helicase, putative, expressed
Npp.08A004020.1	Sspon.05G0029960-3D	Sobic.008G033900.2.p	PHD-finger family protein, expressed
Npp.08A004030.1	Sspon.07G0018330-1A	Sobic.008G034000.2.p	avr9/Cf-9 rapidly elicited protein, putative, expressed
Npp.08A004000.1	Sspon.07G0018310-3C	Sobic.008G033800.1.p	pleiotropic drug resistance protein 15, putative, expressed
Npp.08A004010.1	Sspon.07G0018310-2B	Sobic.008G033800.1.p	pleiotropic drug resistance protein 15, putative, expressed
Npp.05A001720.1	Sspon.05G0021120-3D	Sobic.010G242100.1.p	cytochrome P450 domain containing protein, expressed
Npp.05A001710.1	Sspon.05G0021110-2B	Sobic.005G013800.1.p	WRKY104, expressed
Npp.08C016440.1	Sspon.02G0031870-2C	Sobic.008G178901.1.p	hsp20/alpha crystallin family protein, putative, expressed
Npp.05A001730.1	Sspon.05G0021120-1A	Sobic.005G013901.1.p	Sobic.005G013901.1.p
Npp.08B015200.1	-	-
Npp.04C015110.1	Sspon.05G0012570-1A	Sobic.004G157500.2.p	RNA polymerase III RPC4 domain containing protein, expressed
Npp.04C015120.1	Sspon.04G0011470-2B	Sobic.004G157600.1.p	expressed protein
Npp.04C015090.1	Sspon.04G0011490-2C	Sobic.004G157300.1.p	glycerophosphoryl diester phosphodiesterase family protein, putative, expressed
Npp.04C015100.1	Sspon.04G0011480-1A	Sobic.004G157400.1.p	WD domain, G-beta repeat domain containing protein, expressed
Npp.01C024330.1	Sspon.06G0015520-3D	Sobic.001G448300.1.p	phytosulfokines precursor, putative, expressed
Npp.01C024340.1	Sspon.06G0004570-2C	Sobic.001G448200.1.p	ubiquitin carboxyl-terminal hydrolase, family 1, putative, expressed
Npp.01C024310.1	Sspon.05G0004390-1P	Sobic.001G448700.1.p	U-box domain containing protein, expressed
Npp.01C024320.1	Sspon.03G0007130-1A	Sobic.001G448600.1.p	GTP-binding protein, putative, expressed
Npp.03C018890.1	Sspon.03G0012930-1A	Sobic.003G193500.1.p	CK1_CaseinKinase_1.2 - CK1 includes the casein kinase 1 kinases, expressed
Npp.03C018880.1	Sspon.08G0012830-1A	Sobic.010G114800.2.p	cyclin-dependent kinase G-1, putative, expressed
Npp.01C024350.1	-	-
Npp.01C024360.1	Sspon.05G0022440-1B	Sobic.001G448100.1.p	DNA-directed RNA polymerase subunit, putative, expressed
Npp.03C018850.1	Sspon.03G0012970-2B	Sobic.003G192400.1.p	resistance-related receptor-like kinase, putative, expressed
Npp.03C018840.1	Sspon.03G0012960-2B	Sobic.003G192200.1.p	transporter family protein, putative, expressed
Npp.03C018870.1	Sspon.02G0001400-1A	Sobic.003G193400.2.p	TKL_IRAK_DUF26-lh.10 - DUF26 kinases have homology to DUF26 containing loci, expressed
Npp.03C018860.1	Sspon.03G0012980-1A	Sobic.003G192600.1.p	receptor-like kinase ARK1AS, putative, expressed
Npp.02D016530.1	Sspon.02G0017110-1A	Sobic.002G161400.1.p	DNA-binding protein, putative, expressed
Npp.02D016540.1	Sspon.02G0037410-1B	Sobic.002G034900.1.p	expressed protein
Npp.02D016490.1	Sspon.02G0039150-1B	Sobic.002G160800.2.p	zinc finger, C3HC4 type domain containing protein, expressed
Npp.02D016500.1	Sspon.02G0017130-2B	Sobic.002G161000.2.p	RNA recognition motif containing protein, expressed
Npp.02D016510.1	Sspon.03G0009890-1A	-
Npp.02D016520.1	Sspon.02G0017120-3C	Sobic.002G161200.1.p	OsSub44 - Putative Subtilisin homologue, expressed
Npp.02D016450.1	Sspon.02G0017170-2C	Sobic.002G160400.1.p	glucose-1-phosphate adenylyltransferase large subunit, chloroplast precursor, putative, expressed
Npp.02D016460.1	Sspon.02G0039200-1B	Sobic.002G160600.2.p	indole-3-glycerol phosphate synthase, chloroplast precursor, putative, expressed
Npp.02D016470.1	Sspon.02G0017140-1A	Sobic.002G160600.2.p	indole-3-glycerol phosphate synthase, chloroplast precursor, putative, expressed
Npp.02D016480.1	Sspon.02G0017150-1A	Sobic.002G160700.1.p	WD domain, G-beta repeat domain containing protein, expressed
Npp.06B013690.1	Sspon.05G0007500-1A	Sobic.006G140300.1.p	expressed protein
Npp.06B013680.1	Sspon.03G0002310-3D	Sobic.006G140200.1.p	sialyltransferase family domain containing protein, expressed
Npp.06B013710.1	Sspon.05G0007490-2D	Sobic.006G140400.1.p	DNA mismatch repair protein, putative, expressed
Npp.06B013700.1	Sspon.05G0007490-1A	Sobic.006G140400.1.p	DNA mismatch repair protein, putative, expressed
Npp.06B013650.1	Sspon.05G0025130-1B	Sobic.006G140050.1.p	Sobic.006G140050.1.p
Npp.06B013640.1	Sspon.05G0024700-1B	Sobic.006G140000.1.p	receptor-like protein kinase precursor, putative, expressed
Npp.06B013670.1	Sspon.03G0002310-3D	Sobic.006G140200.1.p	sialyltransferase family domain containing protein, expressed
Npp.06B013660.1	Sspon.05G0024690-2C	Sobic.006G140100.3.p	TMS membrane protein/tumour differentially expressed protein, putative, expressed
Npp.06B013630.1	Sspon.05G0024720-2C	Sobic.006G139700.1.p	OsFBL19 - F-box domain and LRR containing protein, expressed
Npp.06B013620.1	Sspon.05G0024730-2C	Sobic.006G139600.1.p	plant protein of unknown function domain containing protein, expressed
Npp.08D006390.1	Sspon.04G0012220-1A	-
Npp.03D033580.1	Sspon.03G0029330-1B	Sobic.003G362100.1.p	transmembrane amino acid transporter protein, putative, expressed
Npp.03D033590.1	Sspon.03G0039810-1C	Sobic.003G362200.2.p	nucleobase-ascorbate transporter, putative, expressed
Npp.03D033600.1	-	Sobic.003G362300.1.p	expressed protein
Npp.03D033610.1	Sspon.07G0006140-2B	Sobic.003G362400.1.p	G10 protein, putative, expressed
Npp.03D033620.1	Sspon.04G0010570-4D	Sobic.003G362500.1.p	WD domain, G-beta repeat domain containing protein, expressed
Npp.03D033640.1	Sspon.04G0015910-1A	Sobic.003G344050.1.p	transposon protein, putative, Pong sub-class, expressed
Npp.03D033630.1	Sspon.03G0038590-1C	Sobic.003G362600.1.p	AT hook motif family protein, expressed
Npp.03D033650.1	Sspon.07G0006850-3D	Sobic.003G362700.1.p	cytochrome P450, putative, expressed
Npp.03D033560.1	Sspon.03G0039800-1C	Sobic.003G361900.1.p	dehydrodolichyl diphosphate synthase, putative, expressed
Npp.03D033570.1	Sspon.03G0029370-2C	Sobic.003G362000.1.p	3-deoxy-D-manno-octulosonic-acid transferase, putative, expressed
Npp.02B007760.1	Sspon.02G0047420-2D	Sobic.002G067600.1.p	RNA recognition motif containing protein, putative, expressed
Npp.02A020580.1	Sspon.02G0011330-4D	Sobic.002G252200.1.p	expressed protein
Npp.02A020590.1	Sspon.02G0011340-3C	Sobic.002G252300.1.p	expressed protein
Npp.02A020600.1	Sspon.02G0011350-2C	Sobic.002G252400.1.p	expressed protein
Npp.08A009230.1	Sspon.07G0033920-1C	Sobic.008G085700.1.p	exocyst complex component 5, putative, expressed
Npp.02B025060.1	Sspon.02G0009520-3D	Sobic.002G272900.1.p	homeobox associated leucine zipper, putative, expressed
Npp.01C002970.1	Sspon.01G0031650-1P	Sobic.001G028100.1.p	DEAD-box ATP-dependent RNA helicase 3, putative, expressed
Npp.01C002960.1	Sspon.01G0049120-1B	Sobic.002G301800.1.p	GRAS family transcription factor domain containing protein, expressed
Npp.02B007750.1	Sspon.02G0022870-1A	Sobic.001G171200.2.p	expressed protein
Npp.01C003010.1	Sspon.02G0002630-2B	Sobic.001G028200.1.p	U5 small nuclear ribonucleoprotein 200 kDa helicase, putative, expressed
Npp.01C003000.1	Sspon.02G0002630-2B	Sobic.001G028200.1.p	U5 small nuclear ribonucleoprotein 200 kDa helicase, putative, expressed
Npp.01C002990.1	Sspon.08G0023510-1B	Sobic.010G026100.1.p	retrotransposon protein, putative, unclassified, expressed
Npp.01C002980.1	Sspon.02G0002500-2B	Sobic.001G028200.1.p	U5 small nuclear ribonucleoprotein 200 kDa helicase, putative, expressed
Npp.01C003050.1	Sspon.01G0031620-3D	Sobic.001G028700.1.p	expressed protein
Npp.01C003040.1	Sspon.01G0047920-2D	Sobic.001G028600.1.p	expressed protein
Npp.01C003030.1	Sspon.01G0031630-2B	Sobic.001G028500.1.p	expressed protein
Npp.01C003020.1	Sspon.01G0031640-2B	Sobic.001G028400.1.p	domain of unknown function domain containing protein, expressed
Npp.02A020560.1	Sspon.02G0011310-3C	Sobic.002G252000.1.p	CHIT13 - Chitinase family protein precursor, expressed
Npp.08B018280.1	Sspon.02G0052960-1C	Sobic.001G007000.1.p	4-nitrophenylphosphatase, putative, expressed
Npp.02A020570.1	Sspon.02G0011320-3C	Sobic.002G252100.1.p	methyl-binding domain protein MBD, putative, expressed
Npp.08C004090.1	Sspon.02G0032970-1B	Sobic.001G274100.1.p	OsSub54 - Putative Subtilisin homologue, expressed
Npp.08C004100.1	Sspon.05G0004730-1A	-
Npp.10B020050.1	Sspon.08G0029200-1D	-
Npp.08C004080.1	Sspon.05G0029980-2C	Sobic.008G034200.1.p	DNA binding protein, putative, expressed
Npp.08C004130.1	Sspon.04G0027720-2C	Sobic.003G215600.1.p	pleiotropic drug resistance protein, putative, expressed
Npp.10A010060.1	Sspon.08G0002090-1A	Sobic.010G251700.1.p	OsHKT2;4 - Na+ transporter, expressed
Npp.08C004110.1	Sspon.08G0021460-1B	Sobic.010G026100.1.p	retrotransposon protein, putative, unclassified, expressed
Npp.08C004120.1	Sspon.02G0032970-1B	Sobic.001G274100.1.p	OsSub54 - Putative Subtilisin homologue, expressed
Npp.10D012490.1	Sspon.08G0010220-1A	Sobic.010G111800.2.p	no apical meristem protein, putative, expressed
Npp.06C020490.1	Sspon.04G0006220-1P	Sobic.006G189900.1.p	zinc finger, C3HC4 type domain containing protein, expressed
Npp.02D004960.1	-	-
Npp.01C047740.1	Sspon.01G0040030-2D	Sobic.008G114401.1.p	transposon protein, putative, CACTA, En/Spm sub-class, expressed
Npp.01C047730.1	Sspon.01G0011650-3C	Sobic.001G349700.1.p	CPuORF35 - conserved peptide uORF-containing transcript, expressed
Npp.09C001150.1	Sspon.01G0020920-2B	Sobic.001G201800.1.p	transferase family protein, putative, expressed
Npp.09C001160.1	Sspon.07G0037460-1D	Sobic.009G014900.1.p	expressed protein
Npp.01D020380.1	Sspon.06G0024350-2D	Sobic.001G323500.1.p	expressed protein
Npp.09C001140.1	Sspon.01G0020920-4D	Sobic.001G201800.1.p	transferase family protein, putative, expressed
Npp.01D020400.1	Sspon.01G0040810-1B	-
Npp.01D020390.1	Sspon.01G0013160-1A	Sobic.001G323600.1.p	transporter family protein, putative, expressed
Npp.07D011830.1	Sspon.06G0005990-4D	Sobic.007G135800.1.p	ATP-dependent Clp protease adaptor protein ClpS containing protein, expressed
Npp.07D011820.1	Sspon.02G0037990-1B	Sobic.007G135700.1.p	TCP family transcription factor, putative, expressed
Npp.07D011810.1	Sspon.02G0011890-4D	Sobic.001G229850.1.p	retrotransposon protein, putative, unclassified, expressed
Npp.07D011800.1	Sspon.02G0037990-1B	Sobic.007G135700.1.p	TCP family transcription factor, putative, expressed
Npp.07D011790.1	Sspon.05G0032110-2D	Sobic.002G148350.1.p	expressed protein
Npp.01C047770.1	Sspon.01G0011620-1A	Sobic.001G349400.1.p	heat shock protein DnaJ, putative, expressed
Npp.01C047760.1	Sspon.01G0011630-2B	Sobic.001G349500.1.p	ADP-ribosylation factor, putative, expressed
Npp.01C047750.1	Sspon.01G0011640-2C	Sobic.001G349600.2.p	cyclin, putative, expressed
Npp.02C024890.1	Sspon.02G0009780-2C	Sobic.002G269900.1.p	cytokinin-O-glucosyltransferase 2, putative, expressed
Npp.10D012480.1	-	Sobic.006G143100.1.p	ammonium transporter protein, putative, expressed
Npp.01C040920.1	Sspon.02G0045730-1B	Sobic.005G079600.1.p	transposon protein, putative, unclassified, expressed
Npp.02C024910.1	Sspon.02G0009700-2B	Sobic.002G270100.1.p	expressed protein
Npp.02C024920.1	Sspon.02G0009690-1A	Sobic.002G270200.1.p	OsFBX339 - F-box domain containing protein, expressed
Npp.02C024930.1	Sspon.02G0009680-1P	Sobic.002G270300.1.p	zinc RING finger protein, putative, expressed
Npp.02C022100.1	Sspon.02G0013570-1A	Sobic.002G222200.1.p	OsPDIL2-3 protein disulfide isomerase PDIL2-3, expressed
Npp.02C022090.1	Sspon.02G0013600-2C	Sobic.002G221900.1.p	1-aminocyclopropane-1-carboxylate oxidase protein, putative, expressed
Npp.02C022160.1	Sspon.02G0013520-2B	Sobic.002G222800.1.p	galactosyltransferase, putative, expressed
Npp.02C022150.1	Sspon.02G0013530-2B	Sobic.002G222700.1.p	aspartic proteinase nepenthesin-1 precursor, putative, expressed
Npp.02C022180.1	Sspon.08G0015790-2B	Sobic.002G222900.1.p	transmembrane protein 50A, putative, expressed
Npp.02C022170.1	Sspon.02G0030350-1A	Sobic.003G048100.1.p	retrotransposon protein, putative, unclassified, expressed
Npp.02C022120.1	Sspon.02G0013550-3D	Sobic.002G222400.1.p	expressed protein
Npp.02C022110.1	Sspon.02G0013560-1A	Sobic.002G222300.1.p	transcription regulator, putative, expressed
Npp.02C022140.1	Sspon.02G0013530-2B	Sobic.002G222600.1.p	aspartic proteinase nepenthesin precursor, putative, expressed
Npp.02C022130.1	Sspon.02G0013540-2B	Sobic.002G222500.1.p	lysM domain-containing GPI-anchored protein precursor, putative, expressed
Npp.04A013600.1	Sspon.03G0045320-1D	Sobic.002G159750.1.p	Sobic.002G159750.1.p
Npp.04A013610.1	Sspon.05G0032690-1C	Sobic.010G132900.1.p	expressed protein
Npp.04A013640.1	Sspon.04G0027090-1B	Sobic.003G046700.1.p	expressed protein
Npp.04A013650.1	Sspon.04G0027090-2C	Sobic.003G046700.1.p	expressed protein
Npp.04A013620.1	Sspon.08G0027140-2D	Sobic.010G120000.1.p	embryogenesis transmembrane protein, putative, expressed
Npp.04A013630.1	Sspon.04G0027090-2C	Sobic.003G046700.1.p	expressed protein
Npp.04A013680.1	Sspon.04G0014260-1A	Sobic.004G109000.1.p	chalcone isomerase 3, putative, expressed
Npp.04A013690.1	Sspon.04G0014250-1P	Sobic.004G109100.3.p	zinc finger, C3HC4 type domain containing protein, expressed
Npp.04A013660.1	Sspon.04G0034290-1C	Sobic.003G046700.1.p	expressed protein
Npp.04A013670.1	Sspon.04G0014250-1P	Sobic.004G109400.1.p	zinc finger, C3HC4 type domain containing protein, expressed
Npp.01A026270.1	Sspon.06G0032850-1D	-
Npp.04A039170.1	Sspon.05G0028370-1B	Sobic.005G097000.1.p	serpin domain containing protein, putative, expressed
Npp.01C039530.1	Sspon.01G0006310-3C	Sobic.001G452700.1.p	serine/threonine-protein kinase receptor precursor, putative, expressed
Npp.01C039540.1	Sspon.01G0006320-2B	Sobic.001G452600.1.p	leucine-rich repeat family protein, putative, expressed
Npp.01C039550.1	Sspon.01G0006330-1A	Sobic.001G452500.1.p	MA3 domain containing protein, expressed
Npp.01A026280.1	Sspon.02G0050610-1C	-
Npp.01C039490.1	Sspon.02G0036510-3D	Sobic.010G167400.1.p	Sobic.010G167400.1.p
Npp.01C039500.1	Sspon.01G0007690-3D	Sobic.001G453100.1.p	homocysteine S-methyltransferase protein, putative, expressed
Npp.01C039510.1	Sspon.01G0007340-2B	Sobic.001G453000.2.p	no apical meristem protein, putative, expressed
Npp.01C039520.1	Sspon.01G0006300-1P	Sobic.001G452900.1.p	glucan endo-1,3-beta-glucosidase precursor, putative, expressed
Npp.03A005120.1	Sspon.03G0036470-1B	Sobic.003G045200.1.p	expressed protein
Npp.07A019200.1	Sspon.06G0002510-1A	Sobic.007G196500.1.p	SAM domain containing protein, putative, expressed
Npp.02D030180.1	Sspon.02G0007340-3D	Sobic.002G306600.1.p	proteasome subunit, putative, expressed
Npp.02D030170.1	Sspon.02G0048310-1C	Sobic.002G306500.2.p	SNF7 family protein, putative, expressed
Npp.02D030160.1	Sspon.02G0007350-3D	Sobic.002G306400.1.p	zinc finger family protein, putative, expressed
Npp.02D030150.1	Sspon.02G0007360-1P	Sobic.002G306300.1.p	nucleobase-ascorbate transporter, putative, expressed
Npp.02D030140.1	Sspon.02G0007370-2C	Sobic.002G306201.1.p	immunophilin, putative, expressed
Npp.02D030130.1	Sspon.02G0048330-2D	Sobic.002G306100.1.p	ubiquinol-cytochrome C chaperone family protein, putative, expressed
Npp.02D030120.1	Sspon.02G0048350-2D	Sobic.002G306000.2.p	calmodulin-binding transcription activator 5, putative, expressed
Npp.02D030110.1	Sspon.02G0035690-3D	Sobic.002G305900.1.p	expressed protein
Npp.02D030100.1	Sspon.02G0048340-2D	Sobic.002G305800.1.p	expansin precursor, putative, expressed
Npp.02D030090.1	Sspon.02G0007440-4D	Sobic.002G305700.1.p	2Fe-2S iron-sulfur cluster binding domain containing protein, expressed
Npp.01B017910.1	Sspon.02G0021720-1A	Sobic.004G095600.1.p	NBS-LRR type disease resistance protein, putative, expressed
Npp.01B017920.1	Sspon.01G0023340-1P	Sobic.001G168500.1.p	serpin domain containing protein, putative, expressed
Npp.01B017890.1	Sspon.01G0023320-3D	Sobic.001G168700.2.p	expressed protein
Npp.01B017900.1	Sspon.01G0023340-3C	Sobic.001G168600.1.p	serpin domain containing protein, putative, expressed
Npp.01B017950.1	Sspon.01G0023420-1A	Sobic.001G167900.1.p	oxidoreductase, aldo/keto reductase family protein, putative, expressed
Npp.01B017960.1	Sspon.01G0023410-3C	Sobic.001G167800.1.p	single-stranded DNA-binding protein, putative, expressed
Npp.01B017930.1	Sspon.02G0029960-1A	Sobic.001G168400.1.p	CAMK_CAMK_like.20 - CAMK includes calcium/calmodulin depedent protein kinases, expressed
Npp.01B017940.1	Sspon.01G0023420-1T	Sobic.001G168250.1.p	oxidoreductase, aldo/keto reductase family protein, putative, expressed
Npp.02C016470.1	Sspon.06G0003660-3C	Sobic.002G168100.1.p	Plant PDR ABC transporter associated domain containing protein, expressed
Npp.01B017870.1	Sspon.02G0029820-1A	Sobic.008G144500.1.p	ZOS12-09 - C2H2 zinc finger protein, expressed
Npp.01B017880.1	Sspon.01G0023330-1A	Sobic.002G096700.1.p	no apical meristem protein, putative, expressed
Npp.03A011070.1	Sspon.03G0017210-3C	Sobic.003G120300.1.p	NAD dependent epimerase/dehydratase family protein, putative, expressed
Npp.03A011060.1	Sspon.03G0043050-1C	Sobic.010G040700.1.p	transferase family domain containing protein, expressed
Npp.03A011050.1	Sspon.07G0014730-2C	Sobic.001G252200.2.p	expressed protein
Npp.03A011040.1	Sspon.04G0000800-1A	Sobic.004G344600.1.p	ELMO/CED-12 family protein, putative, expressed
Npp.03A011030.1	Sspon.04G0000810-2D	Sobic.004G344600.1.p	ELMO/CED-12 family protein, putative, expressed
Npp.03A011020.1	Sspon.03G0017200-3C	Sobic.003G119900.1.p	inositol-1-monophosphatase, putative, expressed
Npp.03A011010.1	Sspon.03G0017190-1A	Sobic.003G119800.1.p	no apical meristem protein, putative, expressed
Npp.03A011000.1	Sspon.03G0035020-3D	Sobic.003G119700.2.p	zinc finger, C3HC4 type domain containing protein, expressed
Npp.09D003100.1	Sspon.07G0014690-2C	Sobic.009G024500.1.p	50S ribosomal protein L10, chloroplast precursor, putative, expressed
Npp.03A011090.1	Sspon.03G0017220-2C	Sobic.003G120500.1.p	transmembrane protein 136, putative, expressed
Npp.03A011080.1	Sspon.06G0009710-2B	Sobic.003G120400.1.p	expressed protein
Npp.04A015620.1	Sspon.04G0013140-2B	Sobic.004G125700.1.p	isochorismatase family protein, putative, expressed
Npp.04A015630.1	Sspon.04G0013130-2B	Sobic.004G125800.1.p	tocopherol cyclase, chloroplast precursor, putative, expressed
Npp.04A015600.1	Sspon.04G0026860-2C	Sobic.004G124800.1.p	xyloglucan fucosyltransferase, putative, expressed
Npp.04A015610.1	Sspon.04G0026850-3D	Sobic.004G125300.1.p	xyloglucan fucosyltransferase, putative, expressed
Npp.10C002020.1	Sspon.08G0030560-1D	Sobic.010G017100.1.p	oligopeptide transporter, putative, expressed
Npp.10C002030.1	Sspon.08G0024010-2D	Sobic.010G017400.1.p	DELLA protein SLR1, putative, expressed
Npp.08B009350.1	Sspon.03G0017770-1A	Sobic.002G353300.1.p	polyprenyl synthetase, putative, expressed
Npp.10C002010.1	Sspon.08G0016720-1A	Sobic.010G017000.1.p	RNA recognition motif containing protein, putative, expressed
Npp.10C002040.1	Sspon.08G0023010-3D	Sobic.010G061800.1.p	nodulin, putative, expressed
Npp.10C002050.1	Sspon.08G0023280-1B	Sobic.010G194100.1.p	iron/ascorbate-dependent oxidoreductase, putative, expressed
Npp.01B048170.1	Sspon.01G0051000-1C	Sobic.001G487000.1.p	expressed protein
Npp.01B048180.1	Sspon.01G0050990-1P	Sobic.001G487100.1.p	RNA recognition motif containing protein, putative, expressed
Npp.01B048190.1	Sspon.01G0050980-1C	Sobic.001G487200.1.p	zinc finger, C3HC4 type domain containing protein, expressed
Npp.01B048200.1	Sspon.01G0012220-2B	Sobic.005G080050.1.p	expressed protein
Npp.01C041800.1	Sspon.01G0004190-3D	Sobic.001G486500.3.p	tRNA methyltransferase, putative, expressed
Npp.01C041810.1	Sspon.02G0040370-1B	Sobic.002G120501.1.p	zinc knuckle domain containing protein, expressed
Npp.01C041820.1	Sspon.01G0004180-1A	Sobic.001G486600.1.p	RFC4 - Putative clamp loader of PCNA, replication factor C subunit 4, expressed
Npp.01B048160.1	Sspon.01G0057510-1P	Sobic.001G486900.1.p	exostosin family protein, putative, expressed
Npp.10D026270.1	Sspon.08G0001790-2B	Sobic.010G258300.1.p	integral membrane protein, putative, expressed
Npp.01C041770.1	Sspon.01G0004200-1P	Sobic.001G486300.1.p	phosphatidylinositol transfer, putative, expressed
Npp.07C019980.1	Sspon.06G0001970-1A	Sobic.007G205900.1.p	uvrB/uvrC motif family protein, expressed
Npp.10D025890.1	Sspon.08G0001930-1A	Sobic.010G255500.1.p	exostosin, putative, expressed
Npp.03B014260.1	Sspon.07G0024830-1B	Sobic.002G401600.1.p	glycosyltransferase, putative, expressed
Npp.07A010590.1	Sspon.04G0022030-1B	Sobic.007G102000.3.p	retrotransposon protein, putative, unclassified, expressed
Npp.07A011010.1	Sspon.08G0013330-2D	Sobic.007G080500.2.p	MBTB20 - Bric-a-Brac, Tramtrack, Broad Complex BTB domain with Meprin and TRAF Homology MATH domain, expressed
Npp.05B017760.1	Sspon.05G0016670-2D	Sobic.005G081700.1.p	Sobic.005G081700.1.p
Npp.03D024140.1	Sspon.03G0031940-1B	Sobic.003G252700.1.p	protein of unknown function DUF1421 domain containing protein, expressed
Npp.05C012110.1	Sspon.05G0016670-2D	Sobic.005G081700.1.p	Sobic.005G081700.1.p
Npp.09D023640.1	Sspon.07G0001750-1A	Sobic.001G511800.1.p	expressed protein
Npp.09D023650.1	Sspon.07G0001740-4D	Sobic.009G237900.1.p	plastocyanin-like domain containing protein, putative, expressed
Npp.09D023620.1	Sspon.03G0014790-1A	Sobic.007G091301.1.p	expressed protein
Npp.09D023630.1	Sspon.07G0021470-1B	Sobic.010G019900.1.p	oxidoreductase, aldo/keto reductase family protein, putative, expressed
Npp.05C000120.1	Sspon.05G0036650-1C	Sobic.005G001500.1.p	dof zinc finger domain containing protein, putative, expressed
Npp.05C000110.1	Sspon.07G0028040-3D	Sobic.008G001500.1.p	signal recognition particle receptor subunit beta, putative, expressed
Npp.05C000140.1	Sspon.07G0023140-3D	Sobic.008G001800.3.p	SAG20, putative, expressed
Npp.05C000130.1	Sspon.05G0021670-2P	Sobic.005G001600.1.p	IBR domain containing protein, expressed
Npp.05C000080.1	Sspon.07G0028000-1B	Sobic.008G001200.1.p	RNA recognition motif containing protein, putative, expressed
Npp.05C000070.1	Sspon.01G0030180-1A	-
Npp.05C000100.1	Sspon.07G0028030-2C	Sobic.008G001400.1.p	expressed protein
Npp.05C000090.1	Sspon.02G0017310-1A	Sobic.005G001100.1.p	senescence-induced receptor-like serine/threonine-protein kinase precursor, putative, expressed
Npp.07C022320.1	Sspon.06G0000480-3C	Sobic.007G224900.1.p	RNA recognition motif containing protein, expressed
Npp.07B011930.1	Sspon.06G0022900-1B	Sobic.006G246400.1.p	protein kinase domain containing protein, expressed
Npp.07B011940.1	Sspon.04G0008310-2B	Sobic.004G216500.1.p	transposon protein, putative, CACTA, En/Spm sub-class, expressed
Npp.07A011000.1	Sspon.05G0020850-2C	Sobic.007G080780.1.p	expressed protein
Npp.01C006730.1	-	Sobic.001G068800.1.p	expressed protein
Npp.01C006740.1	Sspon.01G0048620-1B	Sobic.001G069000.1.p	ribose-5-phosphate isomerase A, putative, expressed
Npp.01B049380.1	Sspon.02G0017520-2B	Sobic.001G503700.1.p	DUF677 domain containing protein, putative, expressed
Npp.01B049370.1	Sspon.01G0050800-1P	Sobic.001G503600.2.p	expressed protein
Npp.07C022310.1	Sspon.06G0019220-1B	Sobic.007G224800.1.p	MYB family transcription factor, putative, expressed
Npp.01B049440.1	Sspon.01G0002770-1A	Sobic.001G504200.1.p	HEAT repeat family protein, putative, expressed
Npp.01C006660.1	Sspon.01G0061920-1D	Sobic.001G119900.1.p	transposon protein, putative, CACTA, En/Spm sub-class, expressed
Npp.01B049460.1	Sspon.01G0034910-1B	Sobic.004G025300.1.p	vesicle transport v-SNARE protein, putative, expressed
Npp.01C006680.1	Sspon.01G0056700-2D	Sobic.001G067900.1.p	clathrin adaptor complex small chain domain containing protein, expressed
Npp.01C006690.1	Sspon.01G0029520-2B	Sobic.002G031000.1.p	helix-loop-helix DNA-binding domain containing protein, expressed
Npp.01C006700.1	Sspon.02G0024300-1P	-
Npp.01B049420.1	Sspon.01G0002780-1P	Sobic.001G504000.9.p	Citrate transporter protein, putative, expressed
Npp.01B049410.1	Sspon.01G0002790-1A	Sobic.001G503900.1.p	MT-A70 domain containing protein, expressed
Npp.02C029290.1	Sspon.02G0007420-1A	Sobic.002G305600.1.p	indole-3-acetate beta-glucosyltransferase, putative, expressed
Npp.02C029280.1	Sspon.08G0030740-1D	-
Npp.02C029310.1	Sspon.02G0007440-4D	Sobic.002G305700.1.p	2Fe-2S iron-sulfur cluster binding domain containing protein, expressed
Npp.02C029300.1	Sspon.02G0007430-4D	Sobic.002G305600.1.p	indole-3-acetate beta-glucosyltransferase, putative, expressed
Npp.02C029250.1	Sspon.02G0007540-2B	Sobic.002G305200.1.p	expressed protein
Npp.02C029240.1	Sspon.02G0007380-2C	Sobic.002G305100.1.p	mTERF domain containing protein, expressed
Npp.02C029270.1	Sspon.02G0007400-1T	Sobic.002G305400.1.p	indole-3-acetate beta-glucosyltransferase, putative, expressed
Npp.02C029260.1	Sspon.02G0035720-1B	Sobic.002G305300.1.p	expressed protein
Npp.09B014090.1	Sspon.03G0002130-2P	Sobic.009G151700.1.p	COV1, putative, expressed
Npp.04B011380.1	Sspon.04G0012580-2D	Sobic.009G147300.2.p	expressed protein
Npp.02C029320.1	Sspon.02G0035700-2C	Sobic.002G305900.1.p	expressed protein
Npp.10A014640.1	Sspon.01G0063210-1D	Sobic.002G119000.1.p	retrotransposon protein, putative, unclassified, expressed
Npp.10A014630.1	Sspon.03G0001480-1A	Sobic.005G158400.1.p	expressed protein
Npp.10A014620.1	Sspon.08G0020480-3D	Sobic.010G166100.1.p	40S ribosomal protein S24, putative, expressed
Npp.10A014610.1	Sspon.08G0007490-3D	Sobic.009G195200.1.p	ESP1, putative, expressed
Npp.10A014680.1	Sspon.08G0007440-1A	Sobic.002G203800.1.p	pleiotropic drug resistance protein, putative, expressed
Npp.10A014670.1	Sspon.08G0007450-2B	Sobic.010G166500.1.p	amino acid transporter, putative, expressed
Npp.10A014660.1	Sspon.04G0017340-1A	Sobic.004G056600.3.p	transposon protein, putative, Pong sub-class, expressed
Npp.10A014650.1	Sspon.08G0007460-2C	Sobic.010G166400.1.p	initiator tRNA phosphoribosyl transferase family protein, putative, expressed
Npp.06B020320.1	Sspon.05G0003010-1A	Sobic.006G221000.1.p	soluble starch synthase 3, chloroplast precursor, putative, expressed
Npp.06B020330.1	Sspon.08G0003610-1A	Sobic.006G221200.1.p	60S ribosomal protein L27-3, putative, expressed
Npp.10A014700.1	Sspon.08G0007420-1A	Sobic.010G166600.1.p	amino acid transporter, putative, expressed
Npp.10A014690.1	Sspon.08G0007430-1A	Sobic.002G203800.1.p	pleiotropic drug resistance protein, putative, expressed
Npp.10A020190.1	Sspon.08G0018400-1B	Sobic.003G325900.2.p	pentatricopeptide repeat, putative, expressed
Npp.10A020180.1	Sspon.08G0018440-2D	Sobic.003G325900.2.p	pentatricopeptide repeat, putative, expressed
Npp.06B020260.1	Sspon.05G0002950-1A	Sobic.006G220200.1.p	CPuORF12 - conserved peptide uORF-containing transcript, expressed
Npp.06B020270.1	Sspon.05G0002960-2C	Sobic.006G220400.1.p	exonuclease, putative, expressed
Npp.09C020160.1	Sspon.05G0021810-1B	Sobic.007G088500.1.p	expressed protein
Npp.07D014210.1	Sspon.06G0004170-1A	Sobic.007G158100.1.p	expressed protein
Npp.05B005070.1	Sspon.07G0018410-1A	Sobic.005G037000.1.p	cytochrome P450, putative, expressed
Npp.09B014120.1	Sspon.07G0030860-2D	Sobic.009G152000.1.p	Yip1 domain containing protein, expressed
Npp.09C020150.1	Sspon.05G0021820-1B	Sobic.005G106366.1.p	transposon protein, putative, unclassified, expressed
Npp.07D014250.1	Sspon.06G0004840-1P	Sobic.007G158500.1.p	patatin, putative, expressed
Npp.07D014240.1	Sspon.02G0012950-3D	Sobic.007G158400.1.p	DUF617 domain containing protein, expressed
Npp.07D014230.1	Sspon.06G0004150-2B	Sobic.007G158300.1.p	phosphoglycerate mutase, putative, expressed
Npp.07D014220.1	Sspon.06G0004160-1A	Sobic.007G158200.1.p	oxidoreductase, short chain dehydrogenase/reductase family domain containing protein, expressed
Npp.07D014290.1	-	-
Npp.07D014280.1	Sspon.06G0004840-4D	Sobic.007G158700.1.p	patatin, putative, expressed
Npp.07D014270.1	Sspon.06G0004840-4D	Sobic.007G158700.1.p	patatin, putative, expressed
Npp.07D014260.1	Sspon.06G0004840-1T	Sobic.007G158600.1.p	patatin, putative, expressed
Npp.08A013690.1	Sspon.01G0056640-1C	Sobic.005G024500.1.p	expressed protein
Npp.06D002270.1	Sspon.05G0014590-2B	Sobic.002G163000.1.p	DNA binding protein, putative, expressed
Npp.09D016880.1	Sspon.03G0002750-1A	Sobic.009G160100.3.p	amino acid kinase, putative, expressed
Npp.06D002280.1	Sspon.05G0014600-1A	Sobic.006G018800.1.p	ethylene receptor, putative, expressed
Npp.09B020230.1	Sspon.07G0002620-2B	Sobic.009G227201.1.p	purine permease, putative, expressed
Npp.09C020080.1	Sspon.07G0002550-3C	Sobic.009G225100.1.p	phosphatidylserine synthase, putative, expressed
Npp.08A013680.1	Sspon.07G0031930-1C	Sobic.008G183150.1.p	expressed protein
Npp.09C020070.1	Sspon.07G0021910-2C	Sobic.009G225000.1.p	transmembrane protein 93, putative, expressed
Npp.06D002250.1	Sspon.05G0014580-2B	Sobic.006G018600.1.p	ZOS4-05 - C2H2 zinc finger protein, expressed
Npp.06C015220.1	Sspon.05G0007500-1A	Sobic.006G140300.1.p	expressed protein
Npp.06C015210.1	Sspon.03G0002310-3D	Sobic.006G140200.1.p	sialyltransferase family domain containing protein, expressed
Npp.06C015200.1	Sspon.03G0002310-3D	Sobic.006G140200.1.p	sialyltransferase family domain containing protein, expressed
Npp.06C015190.1	Sspon.05G0024690-2C	Sobic.006G140100.3.p	TMS membrane protein/tumour differentially expressed protein, putative, expressed
Npp.06C015180.1	Sspon.03G0026120-3D	Sobic.009G235801.1.p	Sobic.009G235801.1.p
Npp.06C015170.1	Sspon.05G0024700-1B	Sobic.006G140000.1.p	receptor-like protein kinase precursor, putative, expressed
Npp.06C015160.1	Sspon.05G0024710-1B	Sobic.006G139900.1.p	UDP-glucoronosyl and UDP-glucosyl transferase domain containing protein, expressed
Npp.06C015150.1	Sspon.05G0024720-2C	Sobic.006G139700.1.p	OsFBL19 - F-box domain and LRR containing protein, expressed
Npp.09C020120.1	Sspon.01G0041080-1B	Sobic.003G385600.1.p	transposon protein, putative, CACTA, En/Spm sub-class, expressed
Npp.06C015240.1	Sspon.05G0007480-1A	Sobic.006G140500.1.p	photosystem-II repair protein, putative, expressed
Npp.06C015230.1	Sspon.05G0007490-2D	Sobic.006G140400.1.p	DNA mismatch repair protein, putative, expressed
Npp.08A013670.1	Sspon.02G0007500-1A	Sobic.002G303700.2.p	nucleotide pyrophosphatase/phosphodiesterase, putative, expressed
Npp.09C020140.1	Sspon.05G0021810-1B	Sobic.007G088500.1.p	expressed protein
Npp.01B023410.1	Sspon.01G0043480-1B	Sobic.001G237900.1.p	expansin precursor, putative, expressed
Npp.01B023420.1	Sspon.01G0018600-3C	Sobic.001G238000.1.p	expansin precursor, putative, expressed
Npp.01B023390.1	Sspon.01G0003140-1P	Sobic.001G237700.1.p	transposon protein, putative, CACTA, En/Spm sub-class, expressed
Npp.01B023400.1	Sspon.01G0018640-2B	Sobic.001G237800.1.p	expansin precursor, putative, expressed
Npp.01B023370.1	Sspon.01G0043510-1B	Sobic.001G235500.1.p	cytochrome P450, putative, expressed
Npp.01B023380.1	Sspon.01G0018650-4D	Sobic.001G235500.1.p	cytochrome P450, putative, expressed
Npp.01B023350.1	Sspon.01G0043520-2C	Sobic.001G237500.1.p	transporter family protein, putative, expressed
Npp.01B023360.1	Sspon.01G0054880-2D	Sobic.001G237600.1.p	transcription factor Dp, putative, expressed
Npp.01B023330.1	Sspon.01G0059710-1D	-
Npp.01B023340.1	Sspon.01G0018780-1A	Sobic.001G237300.1.p	heavy-metal-associated domain-containing protein, putative, expressed
Npp.07C010160.1	Sspon.04G0027700-1B	-	retrotransposon protein, putative, unclassified, expressed
Npp.07C010170.1	Sspon.06G0022260-2D	Sobic.004G256600.1.p	KH domain containing protein, putative, expressed
Npp.07C010120.1	Sspon.06G0033920-1D	-
Npp.07C010130.1	Sspon.06G0033920-1D	-
Npp.07C010140.1	Sspon.06G0032180-1C	Sobic.010G130700.1.p	leucine-rich repeat receptor protein kinase EXS precursor, putative, expressed
Npp.07C010150.1	Sspon.06G0007600-4D	Sobic.002G161700.1.p	Myb-like DNA-binding domain containing protein, putative, expressed
Npp.07C010080.1	Sspon.02G0017200-3D	Sobic.007G125800.1.p	expressed protein
Npp.07C010090.1	Sspon.01G0058920-1D	Sobic.001G229850.1.p	retrotransposon protein, putative, unclassified, expressed
Npp.07C010100.1	-	-
Npp.07C010110.1	Sspon.06G0007630-3D	Sobic.002G155400.1.p	serine/threonine-protein kinase BRI1-like 1 precursor, putative, expressed
Npp.02C038460.1	Sspon.03G0002440-1A	Sobic.007G123850.1.p	expressed protein
Npp.02C038470.1	Sspon.03G0002450-1A	Sobic.002G153050.1.p	expressed protein
Npp.02C038480.1	Sspon.02G0002420-2B	Sobic.002G392800.1.p	thymidylate kinase, putative, expressed
Npp.02C038490.1	Sspon.02G0002690-1A	Sobic.002G393000.1.p	pyrrolidone-carboxylate peptidase, putative, expressed
Npp.02C038500.1	Sspon.02G0002410-2B	Sobic.002G393100.1.p	dehydrogenase/reductase, putative, expressed
Npp.02C038510.1	Sspon.01G0010490-2P	Sobic.002G393200.1.p	CAMK_CAMK_like.36 - CAMK includes calcium/calmodulin depedent protein kinases, expressed
Npp.02C038520.1	-	Sobic.002G393266.1.p	Sobic.002G393266.1.p
Npp.02C038530.1	Sspon.02G0002390-1A	Sobic.002G393332.1.p	expressed protein
Npp.02C038540.1	Sspon.01G0010410-3P	Sobic.002G393400.1.p	chaperonin, putative, expressed
Npp.02C038550.1	Sspon.02G0002710-1A	Sobic.002G393700.1.p	expressed protein
Npp.07D016420.1	Sspon.06G0003480-2B	Sobic.007G184200.3.p	haloacid dehalogenase-like hydrolase family protein, putative, expressed
Npp.07C012260.1	Sspon.07G0018560-2D	Sobic.007G127800.1.p	expressed protein
Npp.04D024170.1	Sspon.05G0028290-2C	Sobic.005G100400.1.p	C2H2-type zinc finger family protein
Npp.04D024160.1	Sspon.04G0026940-3D	Sobic.004G114800.1.p	expressed protein
Npp.04D024130.1	Sspon.01G0046500-3D	Sobic.004G114500.1.p	DNA binding protein, putative, expressed
Npp.04D024120.1	Sspon.08G0022160-1B	Sobic.010G086100.1.p	SKIP/SNW domain containing protein, expressed
Npp.04D024150.1	Sspon.02G0042310-1P	Sobic.002G098300.1.p	expressed protein
Npp.04D024140.1	Sspon.04G0026930-1B	Sobic.004G114600.2.p	expressed protein
Npp.04D024090.1	Sspon.04G0026960-1B	Sobic.004G114100.1.p	zinc finger, C3HC4 type domain containing protein, expressed
Npp.04D024080.1	Sspon.04G0026970-1B	Sobic.004G113900.1.p	polygalacturonase, putative, expressed
Npp.04D024110.1	Sspon.08G0022160-1B	Sobic.010G086100.1.p	SKIP/SNW domain containing protein, expressed
Npp.04D024100.1	Sspon.04G0026950-2C	Sobic.004G114300.1.p	Sobic.004G114300.1.p
Npp.09B013860.1	Sspon.07G0030920-1C	Sobic.009G125200.1.p	GASR6 - Gibberellin-regulated GASA/GAST/Snakin family protein precursor, expressed
Npp.09B013850.1	Sspon.07G0007270-1A	Sobic.009G149300.1.p	expressed protein
Npp.10D008570.1	Sspon.08G0011790-1A	Sobic.010G082100.1.p	xyloglucan fucosyltransferase, putative, expressed
Npp.10D008580.1	Sspon.08G0022280-1B	Sobic.010G082100.1.p	xyloglucan fucosyltransferase, putative, expressed
Npp.02D009440.1	Sspon.02G0021770-1A	Sobic.002G085200.3.p	cytokinin-N-glucosyltransferase 1, putative, expressed
Npp.09D008000.1	Sspon.04G0037050-1D	-
Npp.03C034880.1	Sspon.03G0029000-1B	Sobic.003G374500.5.p	expressed protein
Npp.03C034890.1	Sspon.03G0029010-3D	Sobic.003G374400.1.p	chloride channel protein, putative, expressed
Npp.10D008630.1	Sspon.08G0011670-1P	Sobic.010G081800.1.p	bZIP transcription factor, putative, expressed
Npp.10D008640.1	Sspon.08G0011770-1A	Sobic.010G081600.1.p	cytokinin-O-glucosyltransferase 3, putative, expressed
Npp.10D008650.1	Sspon.08G0011770-2P	Sobic.010G081600.1.p	cytokinin-O-glucosyltransferase 3, putative, expressed
Npp.10D008660.1	Sspon.08G0011760-2D	Sobic.010G081700.1.p	PPR repeat domain containing protein, putative, expressed
Npp.10D008590.1	Sspon.08G0022280-1B	Sobic.010G082100.1.p	xyloglucan fucosyltransferase, putative, expressed
Npp.10D008600.1	Sspon.08G0011790-1P	Sobic.010G082100.1.p	xyloglucan fucosyltransferase, putative, expressed
Npp.10D008610.1	Sspon.08G0011690-4D	Sobic.010G082000.1.p	xyloglucan fucosyltransferase, putative, expressed
Npp.10D008620.1	Sspon.08G0011680-4D	Sobic.010G081900.1.p	peroxisomal multifunctional enzyme type 2, putative, expressed
Npp.05A014120.1	Sspon.06G0014040-2B	Sobic.005G119100.1.p	OsFBX70 - F-box domain containing protein, expressed
Npp.05A014110.1	Sspon.02G0032450-3C	Sobic.005G118800.1.p	NBS-LRR disease resistance protein, putative, expressed
Npp.05D013540.1	Sspon.06G0025030-1B	Sobic.005G212700.1.p	glutathione S-transferase, putative, expressed
Npp.03C031920.1	Sspon.03G0003850-1A	Sobic.003G336900.1.p	inactive receptor kinase At2g26730 precursor, putative, expressed
Npp.05A014060.1	Sspon.01G0048390-1B	Sobic.002G172000.1.p	protein phosphatase 2C, putative, expressed
Npp.05A014050.1	Sspon.06G0032590-1C	Sobic.005G117100.1.p	expressed protein
Npp.05A014080.1	Sspon.06G0034880-1D	Sobic.005G118400.1.p	expressed protein
Npp.05A014070.1	Sspon.06G0014230-3C	Sobic.005G117300.1.p	ABC transporter, ATP-binding protein, putative, expressed
Npp.05A014100.1	Sspon.06G0025070-2C	Sobic.005G118600.1.p	NB-ARC domain containing protein, expressed
Npp.05A014090.1	Sspon.06G0025060-2C	Sobic.005G118300.1.p	plastocyanin-like domain containing protein, putative, expressed
Npp.02C025580.1	Sspon.02G0009250-3C	Sobic.002G276600.1.p	endoglucanase, putative, expressed
Npp.02C025590.1	Sspon.02G0036400-1B	-
Npp.02C025560.1	-	-
Npp.02C025570.1	Sspon.02G0009270-3C	Sobic.002G276400.1.p	tyrosine protein kinase domain containing protein, putative, expressed
Npp.05A026200.1	Sspon.02G0055730-1D	Sobic.003G056900.1.p	expressed protein
Npp.02C025550.1	Sspon.02G0009280-1A	Sobic.002G276100.1.p	OsLonP4 - Putative Lon protease homologue, expressed
Npp.09D010440.1	Sspon.07G0010360-2B	Sobic.009G098100.1.p	T-complex protein, putative, expressed
Npp.05A026210.1	Sspon.06G0031130-1C	Sobic.009G014400.1.p	expressed protein
Npp.09D010420.1	-	-
Npp.09D010430.1	Sspon.07G0010360-3D	Sobic.009G101800.2.p	peptide transporter PTR3-A, putative, expressed
Npp.08A013700.1	Sspon.02G0029370-1A	Sobic.008G140300.1.p	nucleotide pyrophosphatase/phosphodiesterase, putative, expressed
Npp.07B012320.1	Sspon.05G0019670-1P	Sobic.008G033600.1.p	pyruvate kinase, putative, expressed
Npp.05D002940.1	Sspon.05G0019710-4D	Sobic.005G033100.1.p	acyl-CoA synthetase protein, putative, expressed
Npp.07B012300.1	Sspon.06G0008760-3D	Sobic.007G083900.1.p	B3 DNA binding domain containing protein, expressed
Npp.07B012310.1	Sspon.05G0019670-1P	Sobic.008G033600.1.p	pyruvate kinase, putative, expressed
Npp.05C023180.1	Sspon.01G0038690-2C	Sobic.001G402200.1.p	oxidoreductase, short chain dehydrogenase/reductase family, putative, expressed
Npp.03D028210.1	Sspon.03G0006030-2B	Sobic.003G303500.1.p	homeobox and START domains containing protein, putative, expressed
Npp.05D002950.1	Sspon.05G0019720-1A	Sobic.008G138700.2.p	MLA12, putative, expressed
Npp.05C023190.1	Sspon.06G0027580-3D	Sobic.005G222600.2.p	RGH1A, putative, expressed
Npp.07B012280.1	Sspon.06G0008760-3D	Sobic.007G083900.1.p	B3 DNA binding domain containing protein, expressed
Npp.07B012290.1	Sspon.06G0008760-3D	Sobic.007G083900.1.p	B3 DNA binding domain containing protein, expressed
Npp.09C005350.1	Sspon.07G0026270-1B	Sobic.009G046500.2.p	NBS-LRR disease resistance protein, putative, expressed
Npp.09C005340.1	Sspon.07G0026270-1B	Sobic.009G046500.2.p	NBS-LRR disease resistance protein, putative, expressed
Npp.07A004490.1	Sspon.06G0023910-2C	Sobic.007G039600.1.p	aquaporin protein, putative, expressed
Npp.09B009630.1	Sspon.01G0009070-3D	Sobic.009G088200.1.p	phosphate/phosphate translocator, putative, expressed
Npp.09B009620.1	Sspon.03G0044460-1C	Sobic.009G088100.1.p	helix-loop-helix DNA-binding domain containing protein, expressed
Npp.09B009650.1	Sspon.07G0025160-1B	Sobic.009G088500.1.p	zinc finger, C3HC4 type domain containing protein, expressed
Npp.09B009640.1	Sspon.07G0005350-1A	-
Npp.09B009670.1	Sspon.07G0025120-1B	Sobic.009G088700.1.p	cellulase, putative, expressed
Npp.09B009660.1	Sspon.07G0025140-2D	Sobic.009G088600.1.p	expressed protein
Npp.09B009690.1	Sspon.07G0024890-1B	Sobic.009G088900.1.p	membrane associated DUF588 domain containing protein, putative, expressed
Npp.09B009680.1	Sspon.07G0025100-1B	Sobic.009G088800.1.p	aminotransferase domain containing protein, putative, expressed
Npp.09B009710.1	Sspon.07G0033100-1C	Sobic.007G123850.1.p	expressed protein
Npp.09B009700.1	Sspon.04G0024000-1B	-	expressed protein
Npp.07A004450.1	Sspon.06G0011260-1P	Sobic.007G039300.1.p	ATP-binding region, ATPase-like domain containing protein, expressed
Npp.03A029640.1	Sspon.07G0005390-2C	Sobic.003G332200.1.p	bZIP transcription factor, putative, expressed
Npp.06D021760.1	Sspon.05G0022990-2C	Sobic.006G229300.1.p	receptor-like kinase, putative, expressed
Npp.06D021750.1	Sspon.05G0022920-2P	Sobic.006G229200.1.p	receptor-like kinase, putative, expressed
Npp.06D021780.1	Sspon.05G0030740-1C	Sobic.006G230200.1.p	TKL_IRAK_DUF26-ld.1 - DUF26 kinases have homology to DUF26 containing loci, expressed
Npp.03A029650.1	Sspon.03G0030120-1P	Sobic.003G332300.1.p	AP2 domain containing protein, expressed
Npp.06D021800.1	Sspon.05G0022920-2D	Sobic.006G229200.1.p	receptor-like kinase, putative, expressed
Npp.06D021790.1	Sspon.05G0022870-1B	Sobic.006G229200.1.p	receptor-like kinase, putative, expressed
Npp.06D021820.1	Sspon.08G0005130-1A	Sobic.002G190000.1.p	ZOS9-05 - C2H2 zinc finger protein, expressed
Npp.06D021810.1	Sspon.05G0022980-1P	Sobic.006G229300.1.p	receptor-like kinase, putative, expressed
Npp.06D021840.1	Sspon.05G0022860-1B	Sobic.006G229800.1.p	receptor-like kinase, putative, expressed
Npp.04C014030.1	Sspon.04G0012110-2B	Sobic.004G148000.1.p	Cupin domain containing protein, expressed
Npp.04C014020.1	Sspon.04G0012110-2P	Sobic.004G148100.1.p	Cupin domain containing protein, expressed
Npp.04D023380.1	Sspon.03G0033910-1B	-	Zm00008a039424_P01
Npp.04D023390.1	Sspon.05G0034290-2D	-	transposon protein, putative, CACTA, En/Spm sub-class, expressed
Npp.04A015740.1	Sspon.04G0013250-2B	Sobic.004G127400.1.p	CK1_CaseinKinase_1.4 - CK1 includes the casein kinase 1 kinases, expressed
Npp.01B047890.1	Sspon.01G0004490-1A	Sobic.001G482500.1.p	ubiquitin carboxyl-terminal hydrolase, family 1, putative, expressed
Npp.05B012210.1	Sspon.07G0033100-1C	Sobic.001G255001.1.p	expressed protein
Npp.03A029580.1	Sspon.03G0040290-2P	Sobic.003G331500.1.p	NHL25, putative, expressed
Npp.05B012220.1	Sspon.05G0028390-1B	Sobic.005G096600.1.p	protein kinase domain containing protein, expressed
Npp.05B012200.1	-	-
Npp.04A022030.1	Sspon.04G0008980-1A	Sobic.004G203700.1.p	ubiquitin family protein, putative, expressed
Npp.04A022040.1	Sspon.04G0008960-3D	Sobic.004G203800.1.p	steroid nuclear receptor, ligand-binding, putative, expressed
Npp.05B012180.1	Sspon.05G0016480-1A	Sobic.009G004900.7.p	cysteine-rich receptor-like protein kinase 7 precursor, putative, expressed
Npp.03A029590.1	Sspon.07G0005340-2P	Sobic.003G331600.1.p	OsFBX168 - F-box domain containing protein, expressed
Npp.04D023420.1	Sspon.04G0002660-3P	Sobic.004G310300.1.p	phosphate carrier protein, mitochondrial precursor, putative, expressed
Npp.04A022050.1	Sspon.04G0008970-3D	Sobic.004G203900.1.p	oxidoreductase, short chain dehydrogenase/reductase family, putative, expressed
Npp.04A022060.1	Sspon.04G0020600-2B	Sobic.004G007600.1.p	glycosyltransferase protein, putative, expressed
Npp.01A023610.1	Sspon.02G0056570-1D	Sobic.008G095633.1.p	expressed protein
Npp.04D023430.1	Sspon.04G0002650-2B	Sobic.004G310400.1.p	zinc finger, C3HC4 type domain containing protein, expressed
Npp.01B000580.1	Sspon.01G0033620-1P	Sobic.001G003900.1.p	pentatricopeptide, putative, expressed
Npp.02D013530.1	Sspon.02G0040020-2C	Sobic.002G122600.1.p	ankyrin repeat domain containing protein, expressed
Npp.05D018920.1	Sspon.04G0022870-1B	-
Npp.04B016250.1	Sspon.04G0025030-1B	Sobic.004G192100.1.p	uncharacterized Cys-rich domain containing protein, putative, expressed
Npp.05D018910.1	Sspon.06G0016550-1A	Sobic.005G175000.1.p	glutathione S-transferase, N-terminal domain containing protein, expressed
Npp.02C017800.1	Sspon.04G0002540-2P	Sobic.002G142066.1.p	tyrosine phosphatase family protein, putative, expressed
Npp.02C017810.1	Sspon.02G0018170-1A	Sobic.002G142000.1.p	B3 DNA binding domain containing protein, expressed
Npp.02B035700.1	Sspon.07G0033780-1P	-	expressed protein
Npp.03A029600.1	Sspon.03G0040280-1P	Sobic.003G331700.1.p	thaumatin, putative, expressed
Npp.09D015320.1	Sspon.07G0007830-1A	Sobic.009G139200.1.p	OsDegp7 - Putative Deg protease homologue, expressed
Npp.01B042780.1	Sspon.01G0007010-1A	Sobic.001G427700.1.p	anthranilate synthase component I-1, chloroplast precursor, putative, expressed
Npp.01B042790.1	Sspon.01G0007000-2C	-
Npp.02C017860.1	Sspon.02G0034890-1B	Sobic.001G255001.1.p	expressed protein
Npp.01B042800.1	Sspon.01G0007020-2C	Sobic.001G427800.1.p	tyrosine protein kinase domain containing protein, putative, expressed
Npp.02C017840.1	-	Sobic.002G141900.1.p	Citrate transporter protein, putative, expressed
Npp.02C017850.1	Sspon.02G0018260-2D	Sobic.002G141700.1.p	unc-50, putative, expressed
Npp.02C017820.1	Sspon.07G0003240-1P	Sobic.002G141900.1.p	Citrate transporter protein, putative, expressed
Npp.02C017830.1	-	-
Npp.08C000540.1	Sspon.07G0016660-1P	Sobic.008G003200.1.p	fatty acid desaturase, putative, expressed
Npp.08C000530.1	Sspon.07G0016650-1A	Sobic.005G002900.1.p	OsGrx_S16 - glutaredoxin subgroup II, expressed
Npp.08C000560.1	Sspon.05G0029640-2C	Sobic.008G002950.1.p	expressed protein
Npp.08C000550.1	Sspon.05G0029650-3D	Sobic.008G003100.2.p	expressed protein
Npp.08C000500.1	Sspon.05G0039590-1D	Sobic.008G003700.1.p	clathrin heavy chain, putative, expressed
Npp.08C000520.1	Sspon.07G0016690-1A	Sobic.005G003200.1.p	asparagine synthetase, putative, expressed
Npp.08C000510.1	Sspon.05G0021550-1P	Sobic.008G003600.1.p	proteins of unknown function domain containing protein, expressed
Npp.06D024610.1	Sspon.07G0006420-1P	Sobic.006G264500.1.p	DHHC zinc finger domain containing protein, expressed
Npp.06D012550.1	Sspon.05G0032310-2D	Sobic.006G134550.1.p	thaumatin, putative, expressed
Npp.06A020990.1	Sspon.05G0002120-1A	Sobic.006G250900.3.p	alpha-1,4-glucan-protein synthase, putative, expressed
Npp.09B014070.1	Sspon.07G0007130-2C	Sobic.009G151400.2.p	zinc finger DHHC domain-containing protein, putative, expressed
Npp.06D012540.1	Sspon.04G0008620-3P	Sobic.006G134500.1.p	calcium-binding mitochondrial protein anon-60Da, putative, expressed
Npp.02D013450.1	Sspon.02G0019760-1A	Sobic.002G121800.1.p	transporter family protein, putative, expressed
Npp.07C002420.1	Sspon.06G0012190-3C	Sobic.007G026800.1.p	actin, putative, expressed
Npp.04B016330.1	Sspon.04G0009620-1P	Sobic.004G193000.1.p	peptide transporter PTR2, putative, expressed
Npp.04A014540.1	Sspon.04G0013920-3D	Sobic.004G121900.1.p	expansin precursor, putative, expressed
Npp.07C003610.1	Sspon.04G0034440-1C	Sobic.006G107332.1.p	expressed protein
Npp.07C003620.1	Sspon.06G0034720-1D	Sobic.007G037400.2.p	expressed protein
Npp.07C003630.1	Sspon.06G0011590-1A	Sobic.007G037600.1.p	C4-dicarboxylate transporter/malic acid transport protein, expressed
Npp.07C003640.1	Sspon.06G0011580-2B	Sobic.007G037700.2.p	expressed protein
Npp.07C003650.1	Sspon.06G0011580-2B	Sobic.007G037700.2.p	expressed protein
Npp.07C003660.1	Sspon.06G0011580-1A	Sobic.007G037700.2.p	expressed protein
Npp.07C003670.1	Sspon.06G0011580-1A	Sobic.007G037700.2.p	expressed protein
Npp.09A009060.1	Sspon.03G0035770-2D	Sobic.009G083600.1.p	OsCML18 - Calmodulin-related calcium sensor protein, expressed
Npp.09A009050.1	Sspon.07G0015320-3C	Sobic.009G083300.1.p	white-brown complex homolog protein 12, putative, expressed
Npp.09A009040.1	Sspon.07G0015300-1A	Sobic.009G083200.1.p	coiled-coil domain-containing protein 25, putative, expressed
Npp.02D000870.1	Sspon.02G0000080-1A	Sobic.002G337800.1.p	MYB family transcription factor, putative, expressed
Npp.02D000860.1	Sspon.08G0015830-1A	Sobic.001G484600.1.p	cysteine-rich receptor-like protein kinase 8 precursor, putative, expressed
Npp.02D000790.1	Sspon.02G0043430-1B	Sobic.002G007800.1.p	transcription factor jumonji, putative, expressed
Npp.02D000780.1	Sspon.02G0043410-2D	Sobic.002G007700.1.p	nodulin family protein, putative, expressed
Npp.02D000810.1	Sspon.02G0025940-2D	Sobic.002G008000.1.p	DnaK family protein, putative, expressed
Npp.02D000800.1	Sspon.02G0025940-2D	Sobic.002G008000.1.p	DnaK family protein, putative, expressed
Npp.02D000830.1	Sspon.02G0025950-2D	Sobic.008G038900.2.p	eukaryotic aspartyl protease domain containing protein, expressed
Npp.02D000820.1	Sspon.02G0058890-1D	-
Npp.02D000850.1	Sspon.02G0025960-1A	Sobic.002G008000.1.p	DnaK family protein, putative, expressed
Npp.02D000840.1	Sspon.02G0025960-1A	Sobic.002G008000.1.p	DnaK family protein, putative, expressed
Npp.09D003750.1	Sspon.04G0031780-1C	Sobic.003G443500.1.p	cyclase/dehydrase family protein, expressed
Npp.09A018120.1	Sspon.07G0026110-1B	Sobic.010G026100.1.p	retrotransposon protein, putative, unclassified, expressed
Npp.09A018130.1	Sspon.03G0005250-3D	Sobic.009G187900.1.p	ethylene-responsive protein related, putative, expressed
Npp.09A018060.1	Sspon.07G0004830-4D	Sobic.009G187100.1.p	expressed protein
Npp.09A018070.1	Sspon.07G0004790-4D	Sobic.009G187400.1.p	heat shock protein, putative, expressed
Npp.09A018040.1	Sspon.07G0004830-3C	Sobic.009G186900.1.p	UDP-glucoronosyl/UDP-glucosyl transferase, putative, expressed
Npp.09A018050.1	Sspon.07G0004820-2B	Sobic.009G187000.1.p	UDP-glucoronosyl and UDP-glucosyl transferase domain containing protein, expressed
Npp.09A018100.1	Sspon.02G0047670-1C	Sobic.003G056900.1.p	expressed protein
Npp.05B013450.1	-	-
Npp.09A018080.1	Sspon.07G0004780-3C	Sobic.009G187500.1.p	MONOCULM 1, putative, expressed
Npp.09A018090.1	Sspon.07G0004680-3D	Sobic.009G187700.1.p	OsGH3.4 - Probable indole-3-acetic acid-amido synthetase, expressed
Npp.05B013460.1	Sspon.05G0016030-2B	Sobic.005G103800.1.p	miro, putative, expressed
Npp.09A023730.1	Sspon.07G0001880-1P	Sobic.010G127300.1.p	lectin-like receptor kinase, putative, expressed
Npp.05C015030.1	Sspon.06G0032540-1C	Sobic.005G119250.1.p	NB-ARC domain containing protein, expressed
Npp.05C015040.1	Sspon.06G0032540-1C	Sobic.006G050700.1.p	disease resistance RPP13-like protein 1, putative, expressed
Npp.06B001160.1	Sspon.03G0006530-3C	Sobic.003G294500.1.p	dynamin family protein, putative, expressed
Npp.08B007270.1	Sspon.07G0020830-1A	Sobic.010G026100.1.p	retrotransposon protein, putative, unclassified, expressed
Npp.01A027860.1	-	-
Npp.01A027850.1	Sspon.01G0041700-2D	Sobic.001G273600.1.p	expressed protein
Npp.01A027840.1	Sspon.01G0015830-1A	-	hAT dimerisation domain-containing protein, putative, expressed
Npp.01A025580.1	Sspon.05G0037510-1D	-	retrotransposon protein, putative, unclassified, expressed
Npp.05C015050.1	Sspon.06G0025090-1B	Sobic.005G119400.3.p	stripe rust resistance protein Yr10, putative, expressed
Npp.10C023020.1	Sspon.06G0020660-1B	-
Npp.10C023030.1	Sspon.08G0024680-1P	Sobic.010G273600.1.p	CHIT4 - Chitinase family protein precursor, expressed
Npp.05C022060.1	Sspon.06G0031130-1C	Sobic.009G014400.1.p	expressed protein
Npp.02D039690.1	Sspon.02G0049040-2D	Sobic.002G385400.1.p	ORC6 - Putative origin recognition complex subunit 6, expressed
Npp.03A031220.1	Sspon.03G0003440-1A	Sobic.003G348400.1.p	ankyrin repeat-containing protein, putative, expressed
Npp.09A023740.1	Sspon.07G0001890-3C	Sobic.006G138600.1.p	DIE2/ALG10 family, putative, expressed
Npp.03A031210.1	Sspon.03G0003460-2C	Sobic.003G348200.1.p	Lung seven transmembrane receptor domain containing protein, putative, expressed
Npp.03A031200.1	Sspon.01G0039050-1B	Sobic.003G348100.1.p	white-brown complex homolog protein, putative, expressed
Npp.02A004910.1	Sspon.02G0042290-2C	Sobic.002G042000.1.p	gibberellin receptor GID1L2, putative, expressed
Npp.03A031190.1	Sspon.03G0003200-1P	Sobic.003G347800.1.p	KIP1, putative, expressed
Npp.09B006000.1	Sspon.04G0027570-2C	Sobic.005G196600.1.p	retrotransposon protein, putative, unclassified, expressed
Npp.01D039910.1	Sspon.01G0000840-1A	Sobic.001G533300.1.p	mitochondrial import inner membrane translocase subunit Tim17, putative, expressed
Npp.01D039900.1	Sspon.01G0000850-2C	Sobic.001G533200.1.p	plastocyanin-like domain containing protein, putative, expressed
Npp.01D039930.1	Sspon.01G0057270-1D	Sobic.010G188900.1.p	PPR repeat domain containing protein, putative, expressed
Npp.01D039920.1	Sspon.01G0000830-1A	Sobic.001G533400.1.p	major facilitator superfamily domain-containing protein 5, putative, expressed
Npp.01D039950.1	Sspon.01G0000800-2C	Sobic.001G533700.1.p	STE_PAK_Ste20_STLK.3 - STE kinases include homologs to sterile 7, sterile 11 and sterile 20 from yeast, expressed
Npp.01D039940.1	Sspon.01G0000820-4D	Sobic.001G533500.1.p	mitochondrial import inner membrane translocase subunit Tim, putative, expressed
Npp.01D039970.1	Sspon.01G0057260-1D	Sobic.002G255800.1.p	expressed protein
Npp.01D039960.1	Sspon.01G0000780-4D	Sobic.001G533800.1.p	RNA binding protein, putative, expressed
Npp.01D039990.1	Sspon.01G0034210-1B	Sobic.006G164100.2.p	DUF584 domain containing protein, putative, expressed
Npp.01D039980.1	Sspon.01G0000770-1A	Sobic.001G534000.1.p	kinesin motor domain containing protein, putative, expressed
Npp.05A002350.1	Sspon.05G0030370-3D	Sobic.005G077800.4.p	OsFBX411 - F-box domain containing protein, expressed
Npp.09A023710.1	Sspon.07G0001620-2P	Sobic.009G236100.1.p	3-ketoacyl-CoA synthase, putative, expressed
Npp.03A031240.1	Sspon.03G0003420-1A	Sobic.003G348600.1.p	hydrolase, alpha/beta fold family domain containing protein, expressed
Npp.02C033510.1	Sspon.02G0011430-2B	Sobic.002G250300.1.p	dihydroflavonol-4-reductase, putative, expressed
Npp.02A004940.1	Sspon.08G0006930-2B	Sobic.009G058900.2.p	receptor-like protein kinase precursor, putative, expressed
Npp.03A031230.1	Sspon.03G0003430-2D	Sobic.003G348500.1.p	pectate lyase 4 precursor, putative, expressed
Npp.06D024550.1	Sspon.06G0030900-1C	-
Npp.02A004930.1	Sspon.02G0042290-1B	Sobic.002G042100.1.p	gibberellin receptor GID1L2, putative, expressed
Npp.01B043380.1	Sspon.05G0006480-3C	Sobic.001G431600.1.p	lectin-like receptor kinase, putative, expressed
Npp.01B043370.1	Sspon.01G0038850-1B	Sobic.001G431600.1.p	lectin-like receptor kinase, putative, expressed
Npp.02A004920.1	Sspon.02G0024420-1P	Sobic.002G042100.1.p	gibberellin receptor GID1L2, putative, expressed
Npp.01B043300.1	Sspon.01G0006760-1A	Sobic.001G430700.1.p	expressed protein
Npp.01B043290.1	Sspon.01G0006820-1A	Sobic.001G430600.1.p	cytochrome P450, putative, expressed
Npp.01B043320.1	Sspon.03G0004950-1A	Sobic.001G431000.1.p	Sel1 repeat domain containing protein, putative, expressed
Npp.01B043310.1	Sspon.01G0014650-1A	Sobic.001G430800.1.p	GA17271-PA, putative, expressed
Npp.01B043340.1	Sspon.05G0024790-2C	Sobic.001G431200.1.p	glyoxal oxidase-related, putative, expressed
Npp.01B043330.1	Sspon.01G0014570-2C	Sobic.001G431100.1.p	plastocyanin-like domain containing protein, putative, expressed
Npp.01B043360.1	Sspon.01G0014560-1P	Sobic.001G431500.1.p	gibberellin receptor GID1L2, putative, expressed
Npp.01B043350.1	Sspon.01G0006740-2D	Sobic.001G467300.3.p	40S ribosomal protein S3a, putative, expressed
Npp.09A023720.1	Sspon.07G0001880-2B	Sobic.009G236200.2.p	lectin-like receptor kinase 7, putative, expressed
Npp.10A016340.1	Sspon.08G0020150-3D	Sobic.004G086200.1.p	peptidyl-prolyl cis-trans isomerase, putative, expressed
Npp.10A016350.1	Sspon.08G0006460-3D	Sobic.010G183100.1.p	agenet domain containing protein, putative, expressed
Npp.02A014330.1	Sspon.08G0016120-3D	Sobic.010G026100.1.p	retrotransposon protein, putative, unclassified, expressed
Npp.02A014340.1	Sspon.01G0047810-1B	Sobic.001G132000.1.p	fumarylacetoacetase, putative, expressed
Npp.10A016380.1	Sspon.08G0020090-1B	Sobic.010G162000.1.p	peroxidase precursor, putative, expressed
Npp.10A016390.1	Sspon.08G0006430-1A	Sobic.010G184100.1.p	mitochondrial carrier protein, putative, expressed
Npp.10A016360.1	Sspon.08G0026270-2D	-
Npp.10A016370.1	Sspon.04G0015340-2P	Sobic.010G182966.1.p	cytochrome P450 72A1, putative, expressed
Npp.10A016420.1	Sspon.08G0006400-1P	Sobic.010G184500.1.p	NADP-dependent oxidoreductase, putative, expressed
Npp.10A016430.1	Sspon.08G0006390-2B	Sobic.010G184600.1.p	heme oxygenase 1, putative, expressed
Npp.10A016400.1	Sspon.08G0006420-4D	Sobic.010G184300.1.p	glycosyltransferase family protein, putative, expressed
Npp.10A016410.1	Sspon.08G0006410-1A	Sobic.010G184400.1.p	SMP-30/Gluconolaconase/LRE-like region containing protein, expressed
Npp.04A000730.1	Sspon.04G0029840-1B	-
Npp.04A000740.1	Sspon.04G0034640-1C	-	transposon protein, putative, CACTA, En/Spm sub-class, expressed
Npp.02C013910.1	Sspon.02G0019820-2B	Sobic.002G121000.1.p	expressed protein
Npp.02C013920.1	Sspon.02G0019780-2B	Sobic.002G121100.1.p	OsSCP56 - Putative Serine Carboxypeptidase homologue, expressed
Npp.03C009960.1	Sspon.03G0018990-1A	Sobic.003G095800.1.p	phosphatidylserine synthase, putative, expressed
Npp.10A002150.1	Sspon.08G0016600-2B	Sobic.010G018900.1.p	pentatricopeptide repeat domain containing protein, putative, expressed
Npp.10A002160.1	Sspon.08G0016590-2B	Sobic.010G019000.1.p	uncharacterized membrane protein, putative, expressed
Npp.10A002130.1	Sspon.02G0036010-1B	Sobic.010G018700.1.p	H-BTB4 - Bric-a-Brac, Tramtrack, Broad Complex BTB domain with H family conserved sequence, expressed
Npp.10A002140.1	Sspon.08G0016610-3D	Sobic.010G018800.1.p	impaired sucrose induction 1, putative, expressed
Npp.02C013890.1	Sspon.03G0041830-1C	Sobic.005G071000.1.p	retrotransposon protein, putative, unclassified, expressed
Npp.04A000780.1	Sspon.04G0029850-3D	Sobic.004G012200.1.p	phytosulfokine receptor precursor, putative, expressed
Npp.10A002170.1	Sspon.08G0023950-1B	Sobic.010G019100.1.p	expressed protein
Npp.02C013880.1	Sspon.06G0011670-1T	Sobic.002G120700.1.p	decarboxylase, putative, expressed
Npp.08B016320.1	Sspon.02G0030840-1A	Sobic.010G170150.1.p	cysteine-rich receptor-like protein kinase 8 precursor, putative, expressed
Npp.01B039780.1	Sspon.07G0036200-1D	Sobic.001G195550.1.p	transposon protein, putative, unclassified, expressed
Npp.01B039790.1	Sspon.01G0008330-4D	Sobic.001G394400.1.p	phytochrome B, putative, expressed
Npp.01B039720.1	Sspon.01G0042040-2C	Sobic.001G393700.1.p	expressed protein
Npp.01B039730.1	Sspon.01G0008350-1A	Sobic.001G393800.1.p	enoyl-CoA hydratase/isomerase family protein, putative, expressed
Npp.01B039700.1	Sspon.03G0026670-1B	Sobic.001G393500.2.p	EF hand family protein, putative, expressed
Npp.01B039710.1	Sspon.03G0033160-1B	Sobic.001G393600.1.p	plant protein of unknown function domain containing protein, expressed
Npp.01B039760.1	Sspon.03G0022500-1A	Sobic.003G227501.1.p	ulp1 protease family, C-terminal catalytic domain containing protein, expressed
Npp.01B039770.1	Sspon.07G0036200-1D	Sobic.001G343700.1.p	transposon protein, putative, unclassified, expressed
Npp.01B039740.1	Sspon.01G0008380-1A	Sobic.001G393900.1.p	FAD binding domain containing protein, expressed
Npp.01B039750.1	Sspon.01G0008390-1P	Sobic.001G394000.1.p	GDSL-like lipase/acylhydrolase, putative, expressed
Npp.02C004960.1	Sspon.02G0023970-1A	Sobic.002G037800.1.p	FAD dependent oxidoreductase domain containing protein, expressed
Npp.02C004970.1	Sspon.02G0051950-1C	Sobic.002G037900.1.p	expressed protein
Npp.02C004980.1	Sspon.04G0032530-1C	Sobic.010G183201.1.p	PTHR34189,PTHR34189:SF2
Npp.02C004990.1	Sspon.01G0063430-1D	-
Npp.02C005000.1	Sspon.02G0042410-1B	Sobic.002G038200.1.p	deoxyribonuclease tatD, putative, expressed
Npp.02C005010.1	Sspon.02G0023860-4D	Sobic.002G038300.1.p	RNA recognition motif containing protein, putative, expressed
Npp.02C005020.1	Sspon.01G0045620-1B	Sobic.002G038400.2.p	expressed protein
Npp.02C005030.1	Sspon.02G0042390-2D	Sobic.002G038500.3.p	nuclear transcription factor Y subunit, putative, expressed
Npp.08C005000.1	Sspon.07G0029210-1B	Sobic.008G052200.1.p	beta-galactosidase precursor, putative, expressed
Npp.08C004990.1	Sspon.07G0029200-2C	Sobic.008G052000.1.p	amidase family protein, putative, expressed
Npp.02C004940.1	Sspon.02G0046720-1C	Sobic.006G049450.1.p	retrotransposon protein, putative, unclassified, expressed
Npp.02C004950.1	Sspon.02G0051960-1C	Sobic.002G037700.1.p	expressed protein
Npp.08A015160.1	Sspon.02G0030990-2C	Sobic.008G165800.1.p	Protein kinase domain containing protein, expressed
Npp.08A015170.1	Sspon.02G0031000-1A	Sobic.008G165900.1.p	DEAD-box ATP-dependent RNA helicase, putative, expressed
Npp.08A015220.1	-	Sobic.008G166200.1.p	expressed protein
Npp.08A015230.1	Sspon.02G0031030-1P	Sobic.008G166300.1.p	RING finger protein 13, putative, expressed
Npp.08A015240.1	Sspon.02G0031150-1A	Sobic.008G166900.2.p	receptor-like protein kinase, putative, expressed
Npp.08A015250.1	Sspon.02G0031150-2D	Sobic.008G166900.2.p	receptor-like protein kinase, putative, expressed
Npp.08A015180.1	Sspon.02G0031010-1T	Sobic.008G166050.1.p	PLA IIIA/PLP7, putative, expressed
Npp.08A015190.1	Sspon.02G0031020-1A	Sobic.008G166100.3.p	glycosyl transferase family 17 protein, putative, expressed
Npp.08A015200.1	Sspon.02G0053570-1C	Sobic.008G166400.1.p	NBS-LRR disease resistance protein, putative, expressed
Npp.08A015210.1	-	Sobic.008G166200.1.p	expressed protein
Npp.08A011380.1	Sspon.02G0032770-1A	Sobic.008G117400.1.p	OsGrx_C11 - glutaredoxin subgroup III, expressed
Npp.08A011390.1	Sspon.06G0019130-1A	Sobic.008G118100.1.p	kelch repeat protein, putative, expressed
Npp.08B003190.1	Sspon.07G0019410-1A	Sobic.008G020200.1.p	UDP-N-acetylglucosamine transferase subunit ALG14, putative, expressed
Npp.08B003180.1	Sspon.05G0020540-4D	Sobic.008G020300.1.p	myb-like DNA-binding domain containing protein, putative, expressed
Npp.01B021380.1	Sspon.01G0019990-2B	Sobic.001G211900.2.p	methyltransferase, putative, expressed
Npp.08B003200.1	Sspon.06G0030380-1C	Sobic.001G339000.1.p	terpene synthase, N-terminal domain containing protein, expressed
Npp.01B021360.1	Sspon.01G0020320-2B	Sobic.001G211200.1.p	RIPER3 - Ripening-related family protein precursor, putative, expressed
Npp.01B021370.1	Sspon.01G0019980-1A	Sobic.001G211500.1.p	LIG1 - Putative DNA ligase I, expressed
Npp.01B021340.1	Sspon.01G0020020-1A	Sobic.001G211200.1.p	RIPER3 - Ripening-related family protein precursor, putative, expressed
Npp.01B021350.1	Sspon.01G0044050-1B	Sobic.001G211200.1.p	RIPER3 - Ripening-related family protein precursor, putative, expressed
Npp.04C024670.1	Sspon.04G0005170-3D	Sobic.004G264200.1.p	helix-loop-helix DNA-binding domain containing protein, expressed
Npp.ctg112884	Sspon.04G0023130-1B	Sobic.004G264100.1.p	ATCHX15, putative, expressed
Npp.04B023340.1	Sspon.04G0023130-1B	Sobic.004G264100.1.p	ATCHX15, putative, expressed
Npp.04B023350.1	Sspon.08G0008820-2C	Sobic.004G264000.1.p	cysteine-rich receptor-like protein kinase 7 precursor, putative, expressed
Npp.04B023360.1	Sspon.08G0013690-1P	Sobic.004G263900.1.p	RNA-binding motif protein, putative, expressed
Npp.04B023370.1	Sspon.08G0013680-1A	Sobic.010G055700.1.p	tetratricopeptide repeat domain containing protein, expressed
Npp.06A020280.1	Sspon.08G0024370-1B	Sobic.008G013400.1.p	nodulin, putative, expressed
Npp.06A020270.1	Sspon.02G0019660-1A	Sobic.K044405.1.p	transposon protein, putative, unclassified, expressed
Npp.06A020260.1	Sspon.05G0031580-2D	Sobic.006G243600.2.p	peroxidase precursor, putative, expressed
Npp.06A020250.1	Sspon.05G0002170-1P	Sobic.006G243500.1.p	alpha-N-acetylglucosaminidase, putative, expressed
Npp.06A020240.1	Sspon.05G0002190-1P	Sobic.006G243400.1.p	D-3-phosphoglycerate dehydrogenase, chloroplast precursor, putative, expressed
Npp.04D018630.1	Sspon.03G0046450-1D	-	Zm00008a016182_P01
Npp.02C029170.1	Sspon.02G0007530-1P	Sobic.002G304300.1.p	integral membrane protein DUF6 domain containing protein, expressed
Npp.02C029160.1	Sspon.02G0048420-1C	Sobic.002G304200.1.p	OsFBX224 - F-box domain containing protein, expressed
Npp.02C029150.1	Sspon.02G0035730-3D	Sobic.002G304100.1.p	tRNA synthetases class II domain containing protein, expressed
Npp.02C029140.1	Sspon.02G0007510-3D	Sobic.002G304000.1.p	nitrilase, putative, expressed
Npp.08B004860.1	Sspon.07G0018780-3C	Sobic.008G042300.1.p	HVA22, putative, expressed
Npp.09A023760.1	Sspon.03G0009700-2P	Sobic.009G236400.1.p	iron-sulfur cluster assembly enzyme ISCU, mitochondrial precursor, putative, expressed
Npp.10A021730.1	Sspon.08G0002460-1P	Sobic.010G247200.1.p	ATPase, putative, expressed
Npp.09A018700.1	Sspon.07G0004530-3D	Sobic.009G193500.1.p	AGAP007115-PA, putative, expressed
Npp.07A020580.1	Sspon.01G0059720-1D	Sobic.002G097601.1.p	ulp1 protease family, C-terminal catalytic domain containing protein, expressed
Npp.09A003420.1	Sspon.07G0014200-3C	Sobic.009G030600.1.p	TKL_IRAK_DUF26-lf.3 - DUF26 kinases have homology to DUF26 containing loci, expressed
Npp.07D004110.1	Sspon.06G0018950-3C	Sobic.005G228250.1.p	pollen signalling protein with adenylyl cyclase activity, putative, expressed
Npp.08C006230.1	Sspon.07G0038100-1D	Sobic.008G063300.1.p	exonuclease, putative, expressed
Npp.08C006220.1	Sspon.04G0032040-2D	Sobic.004G299000.1.p	expressed protein
Npp.08C006290.1	Sspon.07G0037530-1D	Sobic.002G080400.2.p	zinc knuckle domain containing protein, expressed
Npp.08C006280.1	Sspon.07G0019890-2B	-	transposon protein, putative, unclassified, expressed
Npp.10C015750.1	Sspon.08G0005690-3C	Sobic.003G364500.1.p	D-mannose binding lectin family protein, expressed
Npp.08C006300.1	Sspon.07G0020030-1A	Sobic.008G064100.2.p	flavin monooxygenase, putative, expressed
Npp.07A020570.1	Sspon.03G0010970-2B	Sobic.003G011400.1.p	late embryogenesis abundant protein, putative, expressed
Npp.08C006240.1	Sspon.07G0019860-1P	Sobic.008G063400.1.p	MYB family transcription factor, putative, expressed
Npp.08C006270.1	Sspon.07G0019900-2B	Sobic.008G063600.1.p	glycosyl hydrolase family protein 27, putative, expressed
Npp.08C006260.1	Sspon.07G0019880-1A	-	expressed protein
Npp.01C024720.1	Sspon.08G0018600-1B	Sobic.002G135200.1.p	ubiquitin fusion protein, putative, expressed
Npp.01C024710.1	Sspon.01G0034690-1B	Sobic.001G444900.1.p	STRUBBELIG-RECEPTOR FAMILY 7 precursor, putative, expressed
Npp.01B048360.1	Sspon.03G0000110-1A	-
Npp.01B048370.1	Sspon.01G0010870-1A	Sobic.001G356100.1.p	GPI-anchored wall transfer protein 1, putative, expressed
Npp.01C024680.1	Sspon.01G0034670-2D	Sobic.001G445200.1.p	expressed protein
Npp.01C024670.1	Sspon.08G0023510-1B	Sobic.010G026100.1.p	retrotransposon protein, putative, unclassified, expressed
Npp.01C024660.1	-	-
Npp.01C024650.1	Sspon.03G0029610-1B	Sobic.004G197400.1.p	expressed protein
Npp.01B048420.1	Sspon.01G0003950-1A	Sobic.001G491200.1.p	ABC transporter family protein, putative, expressed
Npp.01B048430.1	Sspon.08G0019270-1B	-	Zm00008a038957_P01
Npp.01B048440.1	Sspon.01G0003940-2B	Sobic.001G491300.1.p	tetratricopeptide repeat domain containing protein, expressed
Npp.01B048450.1	Sspon.01G0003940-1A	Sobic.001G491400.1.p	cytochrome P450, putative, expressed
Npp.01B048380.1	Sspon.01G0004030-2B	Sobic.001G490500.1.p	conserved oligomeric Golgi complex component 4, related, putative, expressed
Npp.01B048390.1	Sspon.01G0004020-2B	Sobic.001G490600.1.p	ribosomal L18p/L5e family protein, putative, expressed
Npp.01B048400.1	Sspon.01G0050950-1C	Sobic.001G490900.1.p	growth regulator related protein, putative, expressed
Npp.01B048410.1	Sspon.06G0012620-3C	Sobic.001G491000.1.p	ribulose-phosphate 3-epimerase, chloroplast precursor, putative, expressed
Npp.09B006080.1	Sspon.07G0026120-1B	Sobic.009G048100.1.p	lipase, putative, expressed
Npp.07B022440.1	Sspon.02G0011150-2B	Sobic.007G200000.1.p	expressed protein
Npp.01A049020.1	Sspon.01G0001050-1A	Sobic.001G531100.1.p	AP2 domain containing protein, expressed
Npp.01A049030.1	Sspon.01G0001040-4D	Sobic.001G531200.1.p	methylthioribose kinase, putative, expressed
Npp.03B007330.1	Sspon.01G0057760-1D	Sobic.010G124850.1.p	Sobic.010G124850.1.p
Npp.01A049010.1	Sspon.01G0013240-2B	Sobic.001G531000.1.p	expressed protein
Npp.03B007350.1	Sspon.03G0019360-1P	Sobic.003G091700.1.p	seven in absentia protein family protein, expressed
Npp.03B007340.1	Sspon.03G0043330-1C	Sobic.003G091300.1.p	seven in absentia protein family domain containing protein, expressed
Npp.03B007370.1	Sspon.03G0043290-1C	Sobic.003G090650.1.p	transposon protein, putative, unclassified, expressed
Npp.03B007360.1	Sspon.03G0035500-2C	Sobic.003G092300.1.p	expressed protein
Npp.08B017580.1	Sspon.02G0053810-2D	Sobic.008G157700.1.p	BURP domain containing protein, expressed
Npp.08B017590.1	Sspon.02G0029700-1A	-	expressed protein
Npp.02C012740.1	Sspon.02G0040250-3D	Sobic.002G109900.1.p	glycosyl hydrolase, putative, expressed
Npp.02C012730.1	Sspon.02G0020550-2B	Sobic.002G109600.1.p	tic22-like family domain containing protein, expressed
Npp.02C012720.1	Sspon.02G0020560-2B	Sobic.002G109500.1.p	LTPL40 - Protease inhibitor/seed storage/LTP family protein precursor, expressed
Npp.02C012710.1	Sspon.02G0020570-2B	Sobic.002G109400.1.p	LTPL40 - Protease inhibitor/seed storage/LTP family protein precursor, expressed
Npp.02C012780.1	Sspon.07G0036200-1D	Sobic.007G141340.1.p	transposon protein, putative, unclassified, expressed
Npp.02C012770.1	Sspon.02G0020030-3C	Sobic.002G109700.1.p	glycosyl hydrolase, putative, expressed
Npp.02C012760.1	Sspon.07G0030440-1C	Sobic.009G182600.1.p	SH2 motif, putative, expressed
Npp.02C012750.1	Sspon.02G0040250-3D	Sobic.002G109900.1.p	glycosyl hydrolase, putative, expressed
Npp.02C012800.1	Sspon.02G0020530-2B	Sobic.002G110200.1.p	cytochrome P450, putative, expressed
Npp.02C012790.1	Sspon.03G0022500-1A	Sobic.001G331401.1.p	expressed protein
Npp.09C008180.1	Sspon.07G0011300-2D	Sobic.009G072100.1.p	zinc finger CCCH type family protein, putative, expressed
Npp.07B022450.1	Sspon.06G0028350-1C	Sobic.009G089200.3.p	NAD dependent epimerase/dehydratase family domain containing protein, expressed
Npp.08B004850.1	Sspon.07G0018790-1A	Sobic.008G042500.1.p	expressed protein
Npp.09A023690.1	Sspon.07G0021520-1B	Sobic.009G138000.1.p	vrga1, putative, expressed
Npp.01D007190.1	Sspon.01G0044600-2D	Sobic.001G186800.1.p	ATPAP18/PAP18, putative, expressed
Npp.01C042820.1	Sspon.08G0012180-1A	Sobic.002G034900.1.p	expressed protein
Npp.01C042830.1	Sspon.01G0003500-2B	Sobic.001G495200.1.p	glutathione reductase, putative, expressed
Npp.10C019930.1	Sspon.08G0002810-2C	Sobic.010G243300.1.p	ZOS6-08 - C2H2 zinc finger protein, expressed
Npp.01C042810.1	Sspon.03G0033930-1B	-
Npp.01C042860.1	Sspon.01G0003510-1A	-
Npp.01C042870.1	Sspon.01G0003520-2B	Sobic.001G495400.1.p	PPR repeat domain containing protein, putative, expressed
Npp.01C042840.1	Sspon.01G0003640-1A	Sobic.001G495300.1.p	expressed protein
Npp.01C042850.1	Sspon.01G0003640-1A	Sobic.001G495300.1.p	expressed protein
Npp.09C006510.1	Sspon.07G0025940-1B	Sobic.009G056400.1.p	fasciclin domain containing protein, expressed
Npp.04A015090.1	Sspon.08G0014550-1A	Sobic.004G121200.1.p	GDSL-like lipase/acylhydrolase, putative, expressed
Npp.09C006530.1	Sspon.05G0001730-2B	Sobic.006G254000.1.p	naringenin,2-oxoglutarate 3-dioxygenase, putative, expressed
Npp.09C006540.1	Sspon.07G0012220-4D	Sobic.009G056600.1.p	zinc finger, C3HC4 type domain containing protein, expressed
Npp.10C019950.1	Sspon.08G0002780-2D	Sobic.010G243800.1.p	Sobic.010G243800.1.p
Npp.10C019940.1	Sspon.08G0018060-3D	Sobic.010G243400.2.p	expressed protein
Npp.09A023700.1	Sspon.03G0009690-1P	Sobic.009G236000.1.p	GATA zinc finger domain containing protein, expressed
Npp.04A015080.1	Sspon.04G0026410-1B	Sobic.004G121100.1.p	expressed protein
Npp.06A011830.1	Sspon.05G0024890-2D	Sobic.006G131000.1.p	expressed protein
Npp.06A011840.1	-	Sobic.006G131100.1.p	2.7.11.18
Npp.06A011850.1	Sspon.05G0031690-2D	Sobic.006G131200.1.p	DNA-directed RNA polymerase III subunit RPC1, putative, expressed
Npp.06A011860.1	Sspon.02G0038200-1B	-
Npp.06A011790.1	Sspon.05G0007730-2C	Sobic.006G130600.2.p	peptide transporter PTR2, putative, expressed
Npp.06A011800.1	Sspon.05G0008150-1A	Sobic.006G130750.1.p	expressed protein
Npp.06A011810.1	Sspon.05G0008140-4D	Sobic.006G130800.1.p	transporter family protein, putative, expressed
Npp.06A011820.1	Sspon.05G0024900-2D	Sobic.004G005900.1.p	expressed protein
Npp.06A011870.1	Sspon.05G0024870-2D	Sobic.006G131400.1.p	expressed protein
Npp.06A011880.1	Sspon.02G0023170-1A	Sobic.004G054900.1.p	expressed protein
Npp.01B033590.1	Sspon.01G0012800-4D	-
Npp.01B033580.1	Sspon.01G0012790-1A	Sobic.001G330925.1.p	expressed protein
Npp.01B033570.1	Sspon.01G0012780-2B	Sobic.001G330925.1.p	expressed protein
Npp.01B033560.1	Sspon.01G0012780-2B	Sobic.001G331000.1.p	expressed protein
Npp.01B033630.1	Sspon.01G0012820-4D	Sobic.001G330400.1.p	ZOS3-11 - C2H2 zinc finger protein, expressed
Npp.01B033620.1	Sspon.01G0040560-2C	Sobic.001G330500.1.p	polygalacturonase inhibitor 1 precursor, putative, expressed
Npp.01B033610.1	Sspon.01G0012810-1A	Sobic.001G330600.1.p	NAD dependent epimerase/dehydratase family protein, putative, expressed
Npp.01B033600.1	Sspon.01G0012810-1P	Sobic.001G330700.1.p	NAD dependent epimerase/dehydratase family protein, putative, expressed
Npp.04C009780.1	Sspon.04G0014470-1A	Sobic.004G104900.1.p	CGMC_GSK.4 - CGMC includes CDA, MAPK, GSK3, and CLKC kinases, expressed
Npp.04C009790.1	Sspon.08G0030860-1D	Sobic.008G096050.1.p	retrotransposon protein, putative, Ty3-gypsy subclass
Npp.01B033550.1	Sspon.01G0012770-4D	Sobic.001G331100.2.p	expressed protein
Npp.01B033540.1	Sspon.01G0012740-2B	Sobic.001G326400.1.p	cytochrome P450, putative, expressed
Npp.07C015020.1	Sspon.06G0004930-2B	Sobic.007G152600.1.p	cytochrome P450, putative, expressed
Npp.07C015090.1	Sspon.06G0029090-1C	Sobic.002G034900.1.p	expressed protein
Npp.04D017380.1	Sspon.01G0044840-1B	-
Npp.04A020180.1	Sspon.06G0033600-1D	Sobic.005G110556.1.p	RNA-directed DNA polymerase, putative, expressed
Npp.04A020190.1	Sspon.04G0010370-3C	Sobic.004G179000.1.p	chalcone synthase, putative, expressed
Npp.04A020160.1	Sspon.04G0010390-1A	Sobic.004G175500.1.p	OsAPx8 - Thylakoid-bound Ascorbate Peroxidase encoding gene 5,8, expressed
Npp.04A020170.1	Sspon.04G0025440-1P	Sobic.004G175600.1.p	tetratricopeptide repeat domain containing protein, expressed
Npp.04A020140.1	Sspon.04G0025460-2C	Sobic.004G175000.1.p	expressed protein
Npp.04A020150.1	Sspon.04G0010400-2B	Sobic.004G175300.3.p	leucine-rich repeat receptor-like protein kinase 1, putative, expressed
Npp.04A020120.1	Sspon.04G0025470-1B	Sobic.004G174700.1.p	transmembrane 9 superfamily member, putative, expressed
Npp.04A020130.1	Sspon.04G0032680-2D	Sobic.004G174800.2.p	expressed protein
Npp.04A020100.1	Sspon.04G0010420-4D	Sobic.004G174400.1.p	ZOS2-09 - C2H2 zinc finger protein, expressed
Npp.04A020110.1	Sspon.04G0010410-1A	Sobic.004G174600.1.p	multidrug resistance protein, putative, expressed
Npp.07C015060.1	Sspon.06G0021340-3D	Sobic.007G152900.1.p	POLE2A - Putative DNA polymerase epsilon complex subunit, expressed
Npp.06D013470.1	Sspon.06G0023990-1B	Sobic.007G039100.1.p	myb-like DNA-binding domain containing protein, putative, expressed
Npp.06D013460.1	Sspon.04G0008120-3P	Sobic.006G143000.1.p	enzyme of the cupin superfamily protein, putative, expressed
Npp.05C001440.1	Sspon.05G0020960-1A	Sobic.005G015600.1.p	cytochrome P450 72A1, putative, expressed
Npp.06B000580.1	Sspon.05G0015220-3D	Sobic.006G004400.2.p	CCT motif family protein, expressed
Npp.05C001450.1	Sspon.05G0020970-2B	Sobic.005G015450.1.p	cytochrome P450 72A1, putative, expressed
Npp.06A014110.1	Sspon.05G0005510-3D	Sobic.006G175900.1.p	acyl-CoA thioesterase 2, putative, expressed
Npp.06A014120.1	Sspon.04G0023790-3D	Sobic.006G176200.1.p	OsSub43 - Putative Subtilisin homologue, expressed
Npp.09B011610.1	Sspon.07G0036160-1D	Sobic.009G115500.1.p	expressed protein
Npp.05A013170.1	Sspon.05G0023260-1B	Sobic.010G026100.1.p	retrotransposon protein, putative, unclassified, expressed
Npp.09B011590.1	Sspon.07G0009440-1A	-
Npp.06D013430.1	Sspon.05G0007300-2B	Sobic.006G142600.1.p	lipase class 3 family protein, putative, expressed
Npp.02B015650.1	Sspon.03G0000960-1A	-	OsSCP35 - Putative Serine Carboxypeptidase homologue, expressed
Npp.02B015660.1	Sspon.02G0050040-1C	Sobic.002G174200.1.p	WRKY74, expressed
Npp.02B015630.1	Sspon.02G0017860-1P	Sobic.002G174200.1.p	WRKY74, expressed
Npp.02B015640.1	Sspon.04G0003750-1A	Sobic.002G126900.1.p	expressed protein
Npp.06D013420.1	Sspon.05G0007310-1A	Sobic.006G142500.2.p	protein kinase, putative, expressed
Npp.01C019810.1	Sspon.07G0033140-1C	-	retrotransposon protein, putative, unclassified, expressed
Npp.01C019800.1	Sspon.01G0018040-1P	Sobic.001G247300.1.p	calcium-transporting ATPase, plasma membrane-type, putative, expressed
Npp.01D017240.1	Sspon.01G0015060-3C	Sobic.001G290400.1.p	no apical meristem protein, putative, expressed
Npp.01C019820.1	Sspon.01G0018010-3D	Sobic.001G247400.1.p	plant-specific domain TIGR01615 family protein, expressed
Npp.01D017220.1	Sspon.01G0015080-3C	Sobic.001G290200.1.p	leucine rich repeat containing protein, expressed
Npp.01D017230.1	Sspon.01G0015070-2C	Sobic.001G290300.2.p	GTPase of unknown function domain containing protein, putative, expressed
Npp.01D017200.1	Sspon.01G0053870-1C	Sobic.001G290000.1.p	enoyl-CoA hydratase/isomerase family protein, putative, expressed
Npp.01D017210.1	Sspon.01G0041370-2C	Sobic.001G290100.2.p	expressed protein
Npp.01C019790.1	Sspon.03G0027320-2C	Sobic.003G417600.1.p	zinc finger, C3HC4 type domain containing protein, expressed
Npp.01C019780.1	Sspon.01G0018020-2C	Sobic.001G242800.1.p	oxidoreductase, aldo/keto reductase family protein, putative, expressed
Npp.07B006400.1	Sspon.06G0024020-1B	Sobic.007G038432.1.p	expressed protein
Npp.05A022240.1	Sspon.06G0017500-3D	Sobic.005G195900.1.p	transporter family protein, putative, expressed
Npp.08B004840.1	Sspon.07G0018790-2B	-
Npp.02A036100.1	Sspon.02G0010880-2B	Sobic.002G257100.1.p	regulatory protein, putative, expressed
Npp.02A006180.1	Sspon.02G0041580-1B	Sobic.002G061600.3.p	nodulin, putative, expressed
Npp.07C018990.1	Sspon.05G0013390-1A	Sobic.007G189900.1.p	membrane associated DUF588 domain containing protein, putative, expressed
Npp.07C019000.1	Sspon.06G0020100-2D	Sobic.007G190000.1.p	expressed protein
Npp.07C019010.1	Sspon.02G0010620-4D	Sobic.007G190100.1.p	transketolase, putative, expressed
Npp.02A006190.1	Sspon.02G0023200-3D	Sobic.002G061800.2.p	PAZ domain containing protein, putative, expressed
Npp.07C018950.1	Sspon.04G0000200-2D	Sobic.004G353000.1.p	ABC transporter, ATP-binding protein, putative, expressed
Npp.07C018960.1	-	-
Npp.07C018970.1	Sspon.06G0031580-1C	Sobic.001G271700.2.p	expressed protein
Npp.07C018980.1	Sspon.06G0002910-2B	Sobic.007G189800.1.p	CCT/B-box zinc finger protein, putative, expressed
Npp.04C005210.1	Sspon.04G0017510-3C	Sobic.004G053500.1.p	HEAT repeat family protein, putative, expressed
Npp.07C018930.1	Sspon.02G0025830-1P	Sobic.007G189300.1.p	DC1 domain containing protein, expressed
Npp.07C018940.1	Sspon.02G0010580-1P	Sobic.007G189400.1.p	BEE 1, putative, expressed
Npp.07B006390.1	Sspon.06G0011510-1A	Sobic.007G187100.1.p	terpene synthase, putative, expressed
Npp.05A022270.1	Sspon.06G0018150-2B	Sobic.005G205300.1.p	expressed protein
Npp.04D016250.1	Sspon.04G0009120-2B	Sobic.004G201800.1.p	expressed protein
Npp.04D016260.1	Sspon.04G0009130-1A	Sobic.004G201900.1.p	expressed protein
Npp.01C031850.1	Sspon.01G0009060-3C	Sobic.001G381100.1.p	receptor-like protein kinase precursor, putative, expressed
Npp.01C031840.1	-	Sobic.001G381000.1.p	Sobic.001G381000.1.p
Npp.03D028460.1	Sspon.03G0005760-1A	Sobic.003G306700.1.p	acetamidase, putative, expressed
Npp.01C031790.1	Sspon.01G0058430-1D	Sobic.001G380600.1.p	insulin-degrading enzyme, putative, expressed
Npp.04D016340.1	Sspon.04G0009050-2B	Sobic.004G202600.1.p	rhodanese family protein, putative, expressed
Npp.01C031770.1	Sspon.01G0012390-3C	Sobic.001G380400.1.p	reticulon domain containing protein, putative, expressed
Npp.04D016320.1	-	-
Npp.01C031830.1	Sspon.01G0042090-1B	Sobic.001G380900.1.p	pentatricopeptide repeat domain containing protein, putative, expressed
Npp.04D016300.1	Sspon.04G0009190-1A	Sobic.004G202300.1.p	eukaryotic translation initiation factor 4B, putative, expressed
Npp.01C031810.1	Sspon.04G0018210-1A	-
Npp.01C031800.1	Sspon.01G0038150-3P	Sobic.001G380700.1.p	bZIP transcription factor family protein, putative, expressed
Npp.10A021050.1	Sspon.08G0008640-1A	Sobic.010G244600.1.p	nifU, putative, expressed
Npp.10A021060.1	Sspon.08G0002710-1A	Sobic.010G242600.1.p	OsFBDUF53 - F-box and DUF domain containing protein, expressed
Npp.10A021080.1	Sspon.08G0002750-2C	Sobic.010G244900.1.p	auxin efflux carrier, putative, expressed
Npp.10A021070.1	Sspon.08G0018020-1B	Sobic.001G081300.1.p	pentatricopeptide, putative, expressed
Npp.10A021020.1	Sspon.08G0018010-1P	Sobic.010G244100.1.p	GDSL-like lipase/acylhydrolase, putative, expressed
Npp.10A021010.1	Sspon.08G0025120-2D	Sobic.010G244000.1.p	expressed protein
Npp.10A021040.1	Sspon.08G0008660-1A	Sobic.010G244500.1.p	expressed protein
Npp.10A021030.1	Sspon.08G0018000-2C	Sobic.010G244400.1.p	pentatricopeptide repeat domain containing protein, putative, expressed
Npp.10A021000.1	Sspon.08G0002770-4D	Sobic.010G243900.1.p	OsFBO9 - F-box and other domain containing protein, expressed
Npp.10A020990.1	Sspon.08G0002780-2D	Sobic.010G243800.1.p	Sobic.010G243800.1.p
Npp.07B006460.1	Sspon.06G0011490-2B	Sobic.007G005400.1.p	chaperone protein dnaJ, putative, expressed
Npp.10B024870.1	Sspon.08G0002580-4D	Sobic.010G246600.1.p	glycosyl hydrolases family 16, putative, expressed
Npp.09A001070.1	Sspon.01G0020920-2B	Sobic.001G201800.1.p	transferase family protein, putative, expressed
Npp.09A001060.1	Sspon.07G0027710-3D	Sobic.009G007800.1.p	TruB family pseudouridylate synthase, putative, expressed
Npp.07B006450.1	Sspon.06G0024020-1B	Sobic.007G038366.1.p	expressed protein
Npp.09C017550.1	Sspon.07G0004130-1A	Sobic.009G200200.1.p	trehalose-6-phosphate synthase, putative, expressed
Npp.03C026050.1	Sspon.03G0007670-3C	Sobic.003G278400.1.p	DUF581 domain containing protein, expressed
Npp.03C026060.1	Sspon.03G0007660-1A	Sobic.003G278500.1.p	RING finger and CHY zinc finger domain-containing protein 1, putative, expressed
Npp.09A012080.1	Sspon.04G0025930-2D	Sobic.004G320600.1.p	glycosyltransferase, putative, expressed
Npp.08A001360.1	Sspon.07G0016950-1A	Sobic.008G121900.2.p	expressed protein
Npp.03B005100.1	Sspon.03G0021480-2D	Sobic.003G057650.1.p	harpin-induced protein 1 domain containing protein, expressed
Npp.03B005090.1	Sspon.03G0021460-2B	Sobic.003G057500.1.p	Sobic.003G057500.1.p
Npp.08A001350.1	Sspon.07G0016960-1A	Sobic.007G107200.1.p	ankyrin repeat family protein, putative, expressed
Npp.03B005060.1	Sspon.03G0021290-3C	Sobic.008G076600.1.p	verticillium wilt disease resistance protein, putative, expressed
Npp.03B005050.1	Sspon.08G0019540-1B	Sobic.002G143600.1.p	expressed protein
Npp.03B005080.1	Sspon.03G0021510-1P	Sobic.002G210500.1.p	Core histone H2A/H2B/H3/H4 domain containing protein, putative, expressed
Npp.03B005070.1	Sspon.02G0008320-2B	Sobic.002G291066.1.p	Core histone H2A/H2B/H3/H4 domain containing protein, putative, expressed
Npp.03B005020.1	Sspon.03G0021520-2B	Sobic.003G056500.1.p	staphylococcal nuclease homologue, putative, expressed
Npp.03B005010.1	Sspon.03G0021530-2B	Sobic.003G056100.2.p	transcription initiation factor, putative, expressed
Npp.03B005040.1	Sspon.03G0043820-1C	Sobic.002G210500.1.p	Core histone H2A/H2B/H3/H4 domain containing protein, putative, expressed
Npp.03B005030.1	Sspon.03G0043820-1C	-
Npp.03B024870.1	Sspon.02G0048480-2D	Sobic.003G286800.2.p	expressed protein
Npp.03C026070.1	Sspon.03G0007610-2D	Sobic.003G278600.1.p	sulfate transporter, putative, expressed
Npp.08A001320.1	Sspon.01G0046100-1B	Sobic.001G137900.1.p	cytochrome P450, putative, expressed
Npp.08B004830.1	Sspon.05G0027030-1B	Sobic.001G285700.1.p	expressed protein
Npp.03C026080.1	Sspon.02G0055620-1D	Sobic.003G010066.1.p	retrotransposon protein, putative, unclassified, expressed
Npp.08A001310.1	Sspon.07G0016910-1P	Sobic.008G010500.1.p	peroxidase precursor, putative, expressed
Npp.07A014730.1	Sspon.06G0005500-4D	Sobic.007G143400.1.p	tetraspanin family protein, putative, expressed
Npp.03A037640.1	Sspon.03G0037970-1P	Sobic.003G435300.1.p	OsDegp14 - Putative Deg protease homologue, expressed
Npp.07A014710.1	Sspon.06G0005530-1P	Sobic.007G143000.1.p	ribosomal protein S17, putative, expressed
Npp.06C013210.1	Sspon.05G0025260-1B	Sobic.006G113000.1.p	expressed protein
Npp.07A014770.1	Sspon.02G0011690-2B	Sobic.007G144100.1.p	eukaryotic translation initiation factor 3 subunit C, putative, expressed
Npp.07A014760.1	Sspon.06G0005470-2D	Sobic.007G144000.1.p	RING-H2 finger protein, putative, expressed
Npp.07A014750.1	Sspon.06G0005480-3D	Sobic.007G143700.1.p	peptidyl-prolyl cis-trans isomerase, FKBP-type, putative, expressed
Npp.03A037650.1	Sspon.03G0037960-1P	Sobic.003G433750.1.p	phosphatidylserine decarboxylase, putative, expressed
Npp.05A011960.1	Sspon.01G0040430-1B	-	retrotransposon, putative, centromere-specific, expressed
Npp.08A001290.1	Sspon.07G0016920-2C	Sobic.008G010400.1.p	peroxidase precursor, putative, expressed
Npp.07A014690.1	Sspon.06G0005550-2D	Sobic.007G142900.1.p	receptor-like kinase, putative, expressed
Npp.03A037660.1	Sspon.03G0026050-1B	Sobic.003G433900.1.p	expressed protein
Npp.05C021020.1	Sspon.06G0031710-1C	Sobic.005G202000.1.p	expressed protein
Npp.03C041460.1	Sspon.03G0026540-1B	Sobic.003G427700.1.p	expressed protein
Npp.03C041450.1	Sspon.03G0026500-3T	Sobic.003G427700.1.p	expressed protein
Npp.03C041440.1	Sspon.03G0027920-2D	Sobic.003G427600.1.p	villin protein, putative, expressed
Npp.02D039780.1	Sspon.03G0014410-1T	Sobic.003G159600.1.p	auxilin, putative, expressed
Npp.03C041420.1	Sspon.03G0012390-1A	Sobic.003G427400.1.p	signal recognition particle 54 kDa protein, putative, expressed
Npp.03C041410.1	Sspon.03G0027870-1B	Sobic.003G427300.1.p	uridine 5-monophosphate synthase, putative, expressed
Npp.03C041400.1	Sspon.03G0027870-1B	Sobic.003G427200.1.p	uridine 5-monophosphate synthase, putative, expressed
Npp.03C041390.1	Sspon.03G0027880-1B	Sobic.003G427200.1.p	uridine 5-monophosphate synthase, putative, expressed
Npp.03C041380.1	Sspon.03G0027900-1B	Sobic.003G427100.1.p	WD domain, G-beta repeat domain containing protein, expressed
Npp.02D039770.1	Sspon.03G0014420-1A	Sobic.003G159500.1.p	zinc finger, C3HC4 type domain containing protein, expressed
Npp.03A037700.1	Sspon.03G0044690-1D	Sobic.003G425900.2.p	expressed protein
Npp.03A037710.1	Sspon.03G0038680-1C	Sobic.003G434600.1.p	FAD dependent oxidoreductase domain containing protein, expressed
Npp.07A021590.1	Sspon.06G0001460-2B	-
Npp.07A021580.1	Sspon.06G0019590-1B	-
Npp.07A021610.1	Sspon.06G0001440-4D	Sobic.007G213600.1.p	SWIB/MDM2 domain containing protein, expressed
Npp.07A021600.1	Sspon.06G0001450-3C	Sobic.007G213500.1.p	expressed protein
Npp.07A021550.1	Sspon.06G0019610-2C	Sobic.002G138500.1.p	expressed protein
Npp.02B003070.1	Sspon.03G0018370-1A	-
Npp.06B021790.1	Sspon.05G0022340-1B	Sobic.006G237700.1.p	expressed protein
Npp.06B021800.1	Sspon.05G0022330-2D	Sobic.006G237800.1.p	jp18, putative, expressed
Npp.06B021770.1	Sspon.04G0021610-1P	Sobic.006G237500.1.p	PPR repeat domain containing protein, putative, expressed
Npp.06B021780.1	Sspon.05G0022350-1B	Sobic.006G237600.1.p	expressed protein
Npp.06B021750.1	Sspon.05G0022370-1B	Sobic.006G237300.1.p	gibberellin 20 oxidase 2, putative, expressed
Npp.06B021760.1	Sspon.05G0022360-1B	Sobic.006G237400.1.p	cyclic nucleotide-gated ion channel, putative, expressed
Npp.06B021730.1	Sspon.05G0036980-1D	Sobic.006G237200.1.p	vacuolar ATP synthase subunit D 1, putative, expressed
Npp.06B021740.1	Sspon.05G0022370-2D	Sobic.006G237300.1.p	gibberellin 20 oxidase 2, putative, expressed
Npp.06B021710.1	Sspon.05G0036970-1P	Sobic.006G237000.1.p	3-oxoacyl-synthase III, chloroplast precursor, putative, expressed
Npp.06B021720.1	Sspon.05G0022380-2D	Sobic.006G237100.1.p	amidase, putative, expressed
Npp.08A006070.1	Sspon.07G0019530-1A	Sobic.008G057900.1.p	OsAPx6 - Stromal Ascorbate Peroxidase encoding gene 5,8, expressed
Npp.08D004310.1	Sspon.07G0018810-2B	Sobic.008G042600.1.p	N-acetylglucosaminyltransferase I, putative, expressed
Npp.08D004340.1	Sspon.07G0018830-3C	Sobic.008G042900.1.p	harpin-induced protein 1 domain containing protein, expressed
Npp.08D004330.1	Sspon.05G0019090-1P	Sobic.008G042800.1.p	transposon protein, putative, Mutator sub-class, expressed
Npp.08D004360.1	Sspon.07G0018830-4D	Sobic.008G043100.1.p	harpin-induced protein 1 domain containing protein, expressed
Npp.08D004350.1	Sspon.07G0018840-3C	Sobic.008G043000.1.p	histone-like transcription factor and archaeal histone, putative, expressed
Npp.08D004380.1	Sspon.07G0018830-4D	Sobic.008G043100.1.p	harpin-induced protein 1 domain containing protein, expressed
Npp.08D004370.1	-	-
Npp.08D004400.1	Sspon.07G0018850-1A	Sobic.008G043600.1.p	exo70 exocyst complex subunit, putative, expressed
Npp.08D004390.1	Sspon.05G0019030-3P	Sobic.008G043500.1.p	harpin-induced protein 1 domain containing protein, expressed
Npp.06C006800.1	Sspon.05G0030100-1B	-	expressed protein
Npp.10D006620.1	Sspon.08G0022980-2C	Sobic.010G062100.1.p	expressed protein
Npp.10D006630.1	Sspon.08G0022980-3D	Sobic.010G062000.1.p	expressed protein
Npp.10D006560.1	Sspon.08G0023000-2C	Sobic.010G061700.1.p	jp18, putative, expressed
Npp.10D006570.1	Sspon.08G0023010-2C	Sobic.010G061800.1.p	nodulin, putative, expressed
Npp.10D006540.1	Sspon.08G0013440-1A	Sobic.010G060600.1.p	inorganic H+ pyrophosphatase, putative, expressed
Npp.10D006550.1	Sspon.04G0001390-2P	Sobic.010G060701.1.p	heparanase-like protein precursor, putative, expressed
Npp.10D006600.1	Sspon.08G0022950-1P	Sobic.010G061900.1.p	plant protein of unknown function domain containing protein, expressed
Npp.10D006610.1	Sspon.08G0022240-2C	Sobic.010G062000.1.p	expressed protein
Npp.10D006580.1	Sspon.08G0029970-1D	Sobic.007G127100.1.p	oxidoreductase, 2OG-FeII oxygenase domain containing protein, putative, expressed
Npp.10D006590.1	Sspon.08G0029970-1D	Sobic.007G127100.1.p	oxidoreductase, 2OG-FeII oxygenase domain containing protein, putative, expressed
Npp.07A003390.1	Sspon.06G0012370-2B	Sobic.007G024700.2.p	transposon protein, putative, unclassified, expressed
Npp.07A003380.1	Sspon.02G0000790-1T	Sobic.002G190000.1.p	ZOS9-05 - C2H2 zinc finger protein, expressed
Npp.07A003410.1	Sspon.06G0009510-1A	Sobic.002G190000.1.p	ZOS9-05 - C2H2 zinc finger protein, expressed
Npp.07A003400.1	Sspon.06G0021510-1P	Sobic.007G141700.1.p	verticillium wilt disease resistance protein, putative, expressed
Npp.ctg108952	Sspon.06G0029430-2D	Sobic.007G124100.1.p	ethylene-responsive transcription factor, putative, expressed
Npp.07A003420.1	Sspon.06G0009500-2B	Sobic.007G072133.1.p	WRKY106, expressed
Npp.04A005600.1	Sspon.04G0019690-1A	Sobic.004G022200.1.p	inhibitor I family protein, putative, expressed
Npp.ctg108951	Sspon.07G0018590-1A	Sobic.008G039700.2.p	expressed protein
Npp.07B006380.1	Sspon.06G0011510-1A	Sobic.007G187100.1.p	terpene synthase, putative, expressed
Npp.07A003370.1	Sspon.06G0030480-1C	Sobic.007G041200.1.p	cytochrome P450, putative, expressed
Npp.07A003360.1	Sspon.06G0012380-3D	Sobic.007G024500.1.p	zinc finger family protein, putative, expressed
Npp.01A038130.1	Sspon.01G0052830-1T	Sobic.001G381300.1.p	WRKY79, expressed
Npp.01A038120.1	Sspon.01G0009050-3D	Sobic.001G381200.1.p	vacuolar-sorting receptor precursor, putative, expressed
Npp.01A038110.1	Sspon.01G0009060-3C	Sobic.001G381100.1.p	receptor-like protein kinase precursor, putative, expressed
Npp.01A038100.1	Sspon.01G0042090-2C	Sobic.001G380900.1.p	pentatricopeptide repeat domain containing protein, putative, expressed
Npp.01A038170.1	Sspon.07G0033910-2D	Sobic.003G407800.1.p	nucleolar protein NOP5-1, putative, expressed
Npp.01A038160.1	-	Sobic.001G381700.2.p	expressed protein
Npp.01A038150.1	Sspon.01G0009040-2D	Sobic.001G381600.1.p	phospholipid-transporting ATPase, putative, expressed
Npp.01A038140.1	Sspon.01G0009030-1A	Sobic.001G381500.2.p	lung seven transmembrane domain containing protein, putative, expressed
Npp.10C010680.1	Sspon.08G0009270-1A	Sobic.010G126700.1.p	expressed protein
Npp.01A038180.1	Sspon.01G0009020-2D	Sobic.001G381800.2.p	expressed protein
Npp.02C004160.1	Sspon.02G0024500-1A	Sobic.002G028201.1.p	MBTB47 - Bric-a-Brac, Tramtrack, Broad Complex BTB domain with Meprin and TRAF Homology MATH domain, expressed
Npp.02C004150.1	Sspon.02G0024510-1A	Sobic.002G027901.1.p	MBTB45 - Bric-a-Brac, Tramtrack, Broad Complex BTB domain with Meprin and TRAF Homology MATH domain, expressed
Npp.01D021090.1	Sspon.01G0012660-3D	Sobic.001G332900.1.p	S-locus-like receptor protein kinase, putative, expressed
Npp.01D021080.1	Sspon.05G0009410-3C	Sobic.001G332700.1.p	pentatricopeptide repeat protein PPR986-12, putative, expressed
Npp.01D021110.1	Sspon.01G0012640-1A	Sobic.001G333100.1.p	U-box domain-containing protein, putative, expressed
Npp.01D021100.1	Sspon.01G0012650-1A	Sobic.001G333000.1.p	PPR repeat domain containing protein, putative, expressed
Npp.01D021050.1	Sspon.01G0012720-2B	Sobic.001G332200.1.p	cysteine proteinase EP-B 1 precursor, putative, expressed
Npp.01D021040.1	Sspon.01G0012690-3D	Sobic.001G331900.1.p	expressed protein
Npp.01D021070.1	Sspon.01G0012700-1A	Sobic.001G332400.1.p	DUF1336 domain containing protein, expressed
Npp.01D021060.1	Sspon.01G0012710-1A	Sobic.001G332300.1.p	expressed protein
Npp.01D021030.1	Sspon.08G0030740-1D	Sobic.006G107332.1.p	expressed protein
Npp.02A026110.1	Sspon.02G0012560-1P	Sobic.002G333400.1.p	KI domain interacting kinase 1, putative, expressed
Npp.10B004740.1	Sspon.08G0014900-1A	Sobic.010G040100.1.p	expressed protein
Npp.10C018730.1	Sspon.06G0014820-2B	Sobic.010G230800.1.p	O-methyltransferase, putative, expressed
Npp.10C018740.1	Sspon.01G0032800-1A	Sobic.001G012600.1.p	MATE efflux family protein, putative, expressed
Npp.10C018710.1	Sspon.07G0014260-1A	Sobic.009G029600.1.p	glutamate--cysteine ligase, chloroplast precursor, putative, expressed
Npp.10C018720.1	Sspon.08G0025400-1C	Sobic.005G142000.1.p	expressed protein
Npp.10A008920.1	Sspon.08G0011100-3C	Sobic.010G093600.2.p	myosin, putative, expressed
Npp.10A008930.1	-	Sobic.010G056700.1.p	transposon protein, putative, CACTA, En/Spm sub-class
Npp.10A008900.1	Sspon.08G0011120-1A	Sobic.010G093400.1.p	soluble starch synthase 2-3, chloroplast precursor, putative, expressed
Npp.10A008910.1	Sspon.08G0011110-3C	Sobic.010G093500.2.p	CSLA3 - cellulose synthase-like family A; mannan synthase, expressed
Npp.06A003530.1	Sspon.05G0013670-1A	Sobic.006G031000.1.p	MYB family transcription factor, putative, expressed
Npp.06A003540.1	Sspon.08G0028940-1D	Sobic.010G026100.1.p	retrotransposon protein, putative, unclassified, expressed
Npp.10A008940.1	Sspon.03G0041960-2D	-	expressed protein
Npp.10A008950.1	Sspon.08G0011090-2B	Sobic.010G094400.1.p	membrane associated DUF588 domain containing protein, putative, expressed
Npp.06B015870.1	Sspon.04G0007320-2P	Sobic.006G162000.3.p	kinesin motor domain containing protein, expressed
Npp.06B015880.1	Sspon.04G0007320-4D	Sobic.006G162000.3.p	kinesin motor domain containing protein, expressed
Npp.06B015890.1	Sspon.05G0024280-3D	Sobic.006G162100.1.p	glyoxalase family protein, putative, expressed
Npp.06B015900.1	Sspon.05G0006250-1A	Sobic.006G162200.1.p	NDH-M H PLASTOQUINONE DEHY, putative, expressed
Npp.02A030400.1	-	-	nodulin, putative, expressed
Npp.03D029530.1	Sspon.03G0005400-2B	Sobic.003G314500.1.p	expressed protein
Npp.04A031120.1	Sspon.04G0022690-2D	Sobic.004G250600.1.p	NHL repeat-containing protein, putative, expressed
Npp.04A031130.1	Sspon.04G0022680-2D	Sobic.004G250500.1.p	expressed protein
Npp.10D018050.1	Sspon.08G0007070-1A	Sobic.010G172700.1.p	cytochrome P450, putative, expressed
Npp.10D018060.1	Sspon.08G0026430-1C	-
Npp.08C004190.1	Sspon.05G0019570-2P	Sobic.005G036400.1.p	RING-H2 finger protein, putative, expressed
Npp.02B007000.1	Sspon.02G0023220-2C	Sobic.002G061100.1.p	Leucine Rich Repeat family protein, expressed
Npp.10D018110.1	Sspon.04G0014930-5P	Sobic.010G173100.1.p	elongation factor 1-gamma, putative, expressed
Npp.10D018120.1	Sspon.08G0007030-1A	Sobic.010G173400.1.p	GATA zinc finger domain containing protein, expressed
Npp.10D018130.1	Sspon.01G0049900-1B	Sobic.010G173600.1.p	cytokinin dehydrogenase precursor, putative, expressed
Npp.10D018140.1	Sspon.04G0014960-3P	Sobic.010G173700.1.p	tetraspanin family protein, putative, expressed
Npp.10D018070.1	Sspon.01G0021000-1A	Sobic.K044405.1.p	transposon protein, putative, unclassified, expressed
Npp.10D018080.1	Sspon.08G0007060-1A	Sobic.010G172800.1.p	helix-loop-helix DNA-binding domain containing protein, expressed
Npp.10D018090.1	Sspon.08G0007050-4D	Sobic.010G172900.1.p	histone deacetylase, putative, expressed
Npp.10D018100.1	Sspon.08G0007040-3C	Sobic.004G041200.1.p	expressed protein
Npp.05C013480.1	Sspon.05G0016210-3C	Sobic.005G100900.1.p	DAG protein, chloroplast precursor, putative, expressed
Npp.05C013490.1	Sspon.05G0039080-1D	Sobic.005G102900.1.p	NBS-LRR disease resistance protein, putative, expressed
Npp.05C013500.1	Sspon.05G0039080-1D	Sobic.007G071950.1.p	NBS-LRR disease resistance protein, putative, expressed
Npp.05C013510.1	Sspon.05G0028240-2C	Sobic.005G102900.1.p	NBS-LRR disease resistance protein, putative, expressed
Npp.05C013520.1	Sspon.02G0059550-1D	-
Npp.04A031170.1	Sspon.04G0004290-3D	Sobic.004G250100.1.p	pentatricopeptide, putative, expressed
Npp.05B012970.1	Sspon.05G0016190-3C	Sobic.002G421700.1.p	OsFBX368 - F-box domain containing protein, expressed
Npp.05B012980.1	Sspon.05G0016180-2B	Sobic.005G101200.1.p	ELMO/CED-12 family protein, putative, expressed
Npp.04A031180.1	Sspon.03G0024340-3C	-	hAT dimerisation domain-containing protein, putative, expressed
Npp.05C013460.1	Sspon.05G0016230-2C	Sobic.005G100700.1.p	mRNA-capping enzyme, putative, expressed
Npp.05C013470.1	Sspon.05G0016220-1A	Sobic.005G100800.1.p	initiation factor 2 subunit family domain containing protein, expressed
Npp.04B007040.1	Sspon.04G0015520-4D	Sobic.004G084500.2.p	GPI-anchor transamidase precursor, putative, expressed
Npp.02A002610.1	Sspon.02G0024830-3C	Sobic.002G021500.1.p	OsFBX209 - F-box domain containing protein, expressed
Npp.09C002360.1	Sspon.07G0015240-2B	Sobic.009G016700.1.p	glyceraldehyde-3-phosphate dehydrogenase, putative, expressed
Npp.08D000240.1	Sspon.07G0028060-1B	Sobic.005G003100.1.p	expressed protein
Npp.04B007010.1	Sspon.04G0015540-3C	Sobic.004G084200.1.p	calcium-binding mitochondrial carrier CBG00135, putative, expressed
Npp.01C026470.1	Sspon.01G0041180-1T	Sobic.001G300700.1.p	expansin precursor, putative, expressed
Npp.01C026480.1	Sspon.01G0000030-5P	Sobic.001G300800.2.p	expansin precursor, putative, expressed
Npp.10A017770.1	Sspon.08G0004880-3D	Sobic.010G208900.1.p	expressed protein
Npp.07A006550.1	Sspon.06G0030270-1C	Sobic.007G063600.2.p	ubiquitin family protein, putative, expressed
Npp.01C026420.1	Sspon.01G0053690-1C	Sobic.001G300201.1.p	helix-loop-helix DNA-binding domain containing protein, expressed
Npp.06A008630.1	Sspon.05G0010650-3C	Sobic.006G093300.1.p	expressed protein
Npp.06A008640.1	Sspon.08G0010740-2B	Sobic.006G093400.1.p	potassium channel SKOR, putative, expressed
Npp.01C026450.1	Sspon.04G0033720-1C	Sobic.001G347001.1.p	expressed protein
Npp.01C026460.1	-	-
Npp.01C026430.1	Sspon.01G0014170-1A	Sobic.001G300400.1.p	expansin precursor, putative, expressed
Npp.01C026440.1	Sspon.01G0014160-2B	Sobic.001G300500.1.p	expansin precursor, putative, expressed
Npp.09D019130.1	Sspon.03G0030210-1B	Sobic.009G179000.1.p	BRASSINOSTEROID INSENSITIVE 1-associated receptor kinase 1 precursor, putative, expressed
Npp.04B007020.1	Sspon.04G0015530-3C	Sobic.004G084300.1.p	MYB family transcription factor, putative, expressed
Npp.01B001300.1	Sspon.01G0033230-1P	Sobic.001G008700.1.p	DUF565 domain containing protein, putative, expressed
Npp.01B001310.1	Sspon.01G0033220-1P	Sobic.001G008800.1.p	expressed protein
Npp.01B001320.1	Sspon.01G0033210-2D	Sobic.001G008900.1.p	lysine-rich arabinogalactan protein 19 precursor, putative, expressed
Npp.01B001330.1	Sspon.01G0033180-1P	Sobic.001G009000.1.p	expressed protein
Npp.01B001260.1	Sspon.01G0063160-1D	Sobic.001G008400.1.p	brevis radix, putative, expressed
Npp.01B001270.1	Sspon.01G0033240-3P	Sobic.001G008500.1.p	metallo-beta-lactamase, putative, expressed
Npp.01B001280.1	Sspon.01G0033240-1P	Sobic.001G008500.1.p	metallo-beta-lactamase, putative, expressed
Npp.01B001290.1	Sspon.01G0033270-2D	Sobic.001G008600.1.p	phosphoesterase family protein, putative, expressed
Npp.01B001340.1	Sspon.04G0037010-1D	Sobic.009G170600.2.p	ulp1 protease family, C-terminal catalytic domain containing protein, expressed
Npp.01B001350.1	Sspon.01G0033160-1A	Sobic.001G009200.1.p	histone-like transcription factor and archaeal histone, putative, expressed
Npp.09D014440.1	Sspon.07G0008400-1P	Sobic.009G130300.1.p	AWPM-19-like membrane family protein, putative, expressed
Npp.09D014430.1	Sspon.06G0008590-1A	Sobic.009G130200.1.p	endo-1,3;1,4-beta-D-glucanase precursor, putative, expressed
Npp.09D019200.1	Sspon.07G0007190-2B	Sobic.009G178000.1.p	Myb transcription factor, putative, expressed
Npp.09D014520.1	Sspon.07G0024000-2C	Sobic.009G130900.1.p	oxidoreductase, 2OG-Fe oxygenase family protein, putative, expressed
Npp.09D014510.1	Sspon.07G0008380-1A	Sobic.009G130800.1.p	tat pathway signal sequence family protein, expressed
Npp.09D014500.1	Sspon.07G0008360-2B	Sobic.009G130700.1.p	thylakoid lumen protein, putative, expressed
Npp.09D014490.1	Sspon.07G0008370-1A	Sobic.009G130600.1.p	GDSL-like lipase/acylhydrolase, putative, expressed
Npp.09D014480.1	Sspon.07G0008350-1A	Sobic.009G130500.2.p	1-5-phosphoribosyl-5-5-phosphoribosylaminomethylideneaminoimidazole-4-carboxamide isomerase, chloroplast precursor, putative, expressed
Npp.09D014470.1	Sspon.07G0035450-1D	Sobic.009G130400.1.p	DNA-directed RNA polymerase II subunit RPB7, putative, expressed
Npp.09D014460.1	Sspon.03G0022120-1A	Sobic.003G045300.1.p	cobalt ion transporter, putative, expressed
Npp.09D014450.1	Sspon.07G0035460-1D	Sobic.003G427900.1.p	Cupin domain containing protein, expressed
Npp.10D006100.1	Sspon.08G0013560-3D	Sobic.010G010700.1.p	PHD-finger family protein, expressed
Npp.10D006110.1	Sspon.08G0013560-2B	Sobic.001G246900.1.p	MBTB51 - Bric-a-Brac, Tramtrack, Broad Complex BTB domain with Meprin and TRAF Homology MATH domain, expressed
Npp.10D006120.1	Sspon.08G0023030-2D	Sobic.010G057500.2.p	expressed protein
Npp.10D006130.1	Sspon.05G0009150-2C	Sobic.002G160001.1.p	Sobic.002G160001.1.p
Npp.10D006060.1	Sspon.01G0000880-1A	Sobic.010G056300.1.p	PPR repeat domain containing protein, putative, expressed
Npp.10D006070.1	-	Sobic.003G379100.1.p	expressed protein
Npp.10D006080.1	Sspon.08G0023060-1B	Sobic.010G057300.1.p	uncharacterized glycosyltransferase, putative, expressed
Npp.10D006090.1	Sspon.08G0023060-1B	Sobic.010G057400.1.p	uncharacterized glycosyltransferase, putative, expressed
Npp.09A013490.1	Sspon.07G0000060-1A	Sobic.009G133400.1.p	mTERF domain containing protein, expressed
Npp.09D010120.1	Sspon.02G0013340-1A	Sobic.008G148300.1.p	kinesin motor domain containing protein, putative, expressed
Npp.10D006140.1	Sspon.08G0023130-1B	Sobic.001G325000.2.p	NB-ARC domain containing protein, expressed
Npp.10D006150.1	Sspon.04G0001300-1P	Sobic.010G057900.1.p	26S protease regulatory subunit 6A, putative, expressed
Npp.02C021120.1	Sspon.02G0049560-1C	Sobic.002G206500.1.p	queuine tRNA-ribosyltransferase, putative, expressed
Npp.02C021130.1	Sspon.02G0014460-2C	Sobic.002G206600.1.p	class I glutamine amidotransferase, putative, expressed
Npp.07D014030.1	Sspon.06G0029020-1C	-
Npp.07D014040.1	Sspon.06G0021210-2C	Sobic.007G157300.1.p	NAD dependent epimerase/dehydratase family protein, putative, expressed
Npp.07D014050.1	Sspon.06G0021200-1B	Sobic.007G141200.1.p	cinnamoyl-CoA reductase, putative, expressed
Npp.02C021070.1	Sspon.02G0014500-1T	Sobic.002G206000.1.p	BT1 family protein, putative, expressed
Npp.02C021080.1	Sspon.02G0014490-1A	Sobic.002G206100.1.p	aspartic proteinase, putative, expressed
Npp.02C021090.1	Sspon.02G0014480-2B	Sobic.002G206200.1.p	monogalactosyldiacylglycerol synthase, putative, expressed
Npp.02C021100.1	Sspon.02G0014470-1A	Sobic.002G206300.2.p	tsi1-interacting protein TSIP1, putative, expressed
Npp.02C021110.1	Sspon.06G0005570-2C	Sobic.002G206400.1.p	AP2 domain containing protein, expressed
Npp.09D019120.1	Sspon.07G0005360-1P	Sobic.009G179100.1.p	ribosomal protein L7Ae, putative, expressed
Npp.04D025190.1	Sspon.04G0008380-2C	Sobic.004G318800.1.p	SMP-30/Gluconolaconase/LRE-like region containing protein, expressed
Npp.04D025200.1	-	-
Npp.04D025210.1	Sspon.08G0004870-3C	Sobic.004G330300.1.p	NLI interacting factor-like phosphatase, putative, expressed
Npp.04D025220.1	Sspon.05G0003780-3D	Sobic.004G330500.2.p	expressed protein
Npp.04D025230.1	Sspon.03G0008810-1A	-	Zm00008a005160_P01
Npp.04D025240.1	Sspon.06G0001710-1A	Sobic.004G330400.1.p	expressed protein
Npp.04D025250.1	Sspon.04G0001510-2B	Sobic.001G500200.1.p	expressed protein
Npp.04D025260.1	Sspon.07G0034560-1C	Sobic.004G330500.2.p	expressed protein
Npp.04D025270.1	-	Sobic.004G330600.1.p	GHMP kinases ATP-binding protein, putative, expressed
Npp.04D025280.1	Sspon.04G0001530-3D	Sobic.004G330700.1.p	CAF1 family ribonuclease containing protein, putative, expressed
Npp.09C004910.1	Sspon.07G0013100-1A	Sobic.009G043900.1.p	O-methyltransferase, putative, expressed
Npp.03D031590.1	Sspon.03G0003600-1P	Sobic.003G340900.1.p	SAG20, putative, expressed
Npp.09C004890.1	Sspon.07G0013110-2B	Sobic.009G043600.1.p	glutathione S-transferase, putative, expressed
Npp.09C004900.1	Sspon.07G0013110-1A	Sobic.009G043700.1.p	glutathione S-transferase, putative, expressed
Npp.08B001450.1	Sspon.05G0021380-3C	Sobic.008G009600.1.p	double-stranded RNA binding motif containing protein, expressed
Npp.01B011150.1	Sspon.01G0028100-1A	Sobic.001G095366.1.p	OsFBX154 - F-box domain containing protein, expressed
Npp.09C004850.1	Sspon.07G0013140-1A	Sobic.009G043600.1.p	glutathione S-transferase, putative, expressed
Npp.03C001930.1	Sspon.03G0014790-1A	Sobic.007G091301.1.p	expressed protein
Npp.01C036100.1	-	-
Npp.01C036110.1	-	-
Npp.08B001430.1	Sspon.07G0035030-2D	Sobic.008G009200.1.p	SAG20, putative, expressed
Npp.08B001420.1	Sspon.07G0016850-1A	Sobic.008G009100.1.p	SAG20, putative, expressed
Npp.01C036140.1	Sspon.01G0051810-2P	Sobic.001G422100.1.p	haloacid dehalogenase-like hydrolase family protein, putative, expressed
Npp.01C036150.1	Sspon.04G0030000-2C	Sobic.004G006400.1.p	cytochrome P450, putative, expressed
Npp.01C036120.1	Sspon.01G0051830-2D	Sobic.001G421900.1.p	SCARECROW, putative, expressed
Npp.01C036130.1	Sspon.01G0051880-1C	-
Npp.04D010700.1	Sspon.04G0012560-3D	Sobic.004G138000.1.p	expressed protein
Npp.09D010180.1	Sspon.07G0024880-3D	Sobic.009G093200.1.p	superoxide dismutase, mitochondrial precursor, putative, expressed
Npp.03B029690.1	Sspon.03G0003580-4D	Sobic.003G341400.1.p	phox domain-containing protein, putative, expressed
Npp.03B029680.1	Sspon.03G0003590-2B	Sobic.003G341300.1.p	expressed protein
Npp.08D013510.1	Sspon.07G0014130-1A	Sobic.009G031300.1.p	pentatricopeptide containing protein, putative, expressed
Npp.10A013120.1	Sspon.01G0044650-1B	-	expressed protein
Npp.01B011140.1	-	Sobic.004G062900.1.p	Sobic.004G062900.1.p
Npp.04C000820.1	Sspon.05G0015300-2B	Sobic.004G000300.1.p	zinc finger, C3HC4 type, domain containing protein, expressed
Npp.01C006030.1	Sspon.02G0042100-1B	Sobic.001G061400.1.p	protein kinase, putative, expressed
Npp.04D010740.1	Sspon.07G0007400-1A	-	retrotransposon, putative, centromere-specific, expressed
Npp.01C006040.1	Sspon.01G0049010-2D	Sobic.001G061500.1.p	ubiquitin-conjugating enzyme, putative, expressed
Npp.02A021960.1	Sspon.02G0008190-1A	Sobic.002G293700.1.p	ATXR, putative, expressed
Npp.02A021950.1	Sspon.02G0008180-2B	Sobic.002G293600.1.p	cysteinyl-tRNA synthetase, putative, expressed
Npp.02A021980.1	Sspon.02G0008090-2D	Sobic.002G293900.1.p	mitochondrial glycoprotein, putative, expressed
Npp.02A021970.1	Sspon.02G0008090-2D	Sobic.002G293800.1.p	expressed protein
Npp.02A021920.1	Sspon.02G0008210-1A	Sobic.002G293300.1.p	octicosapeptide/Phox/Bem1p, putative, expressed
Npp.02A021910.1	Sspon.02G0008210-1A	Sobic.002G293300.1.p	octicosapeptide/Phox/Bem1p, putative, expressed
Npp.02A021940.1	Sspon.02G0008200-3C	Sobic.002G293500.1.p	sialin, putative, expressed
Npp.02A021930.1	Sspon.02G0008200-3C	Sobic.002G293500.1.p	sialin, putative, expressed
Npp.06C005720.1	Sspon.01G0034330-2D	Sobic.002G210500.1.p	Core histone H2A/H2B/H3/H4 domain containing protein, putative, expressed
Npp.06C005710.1	Sspon.06G0017770-1A	-	expressed protein
Npp.02A021900.1	Sspon.02G0008220-1A	Sobic.002G293200.1.p	signal peptidase complex subunit 3, putative, expressed
Npp.02A021890.1	Sspon.02G0036080-1B	Sobic.002G293100.1.p	ZOS9-17 - C2H2 zinc finger protein, expressed
Npp.02B032360.1	Sspon.02G0004760-2B	Sobic.002G345700.1.p	insulin-degrading enzyme, putative, expressed
Npp.06C005750.1	Sspon.01G0055760-1C	-	hAT dimerisation domain-containing protein, putative, expressed
Npp.06C005740.1	Sspon.07G0036280-1D	-	expressed protein
Npp.06C005730.1	Sspon.02G0015090-1A	-	retrotransposon protein, putative, unclassified, expressed
Npp.02B026870.1	Sspon.02G0008980-2B	Sobic.002G280800.1.p	bZIP transcription factor domain containing protein, expressed
Npp.02B026860.1	Sspon.02G0009000-1A	Sobic.002G280700.1.p	WD domain, G-beta repeat domain containing protein, expressed
Npp.04C000790.1	Sspon.07G0014350-1A	Sobic.004G000700.1.p	leucoanthocyanidin dioxygenase, putative, expressed
Npp.03D036560.1	Sspon.03G0002190-3D	Sobic.003G380600.2.p	mitochondrion protein, putative, expressed
Npp.03A033620.1	Sspon.02G0054280-1C	Sobic.007G170700.1.p	male sterility protein 2, putative, expressed
Npp.02B026950.1	Sspon.02G0056250-1D	Sobic.002G281600.1.p	protein of unknown function domain containing protein, expressed
Npp.02B026940.1	Sspon.02G0008940-3D	Sobic.002G281500.1.p	expressed protein
Npp.02B026930.1	Sspon.02G0008950-2D	Sobic.002G281400.1.p	protein of unknown function DUF1279 domain containing protein, expressed
Npp.02B026920.1	Sspon.02G0048760-1C	Sobic.002G281300.1.p	trafficking protein particle complex subunit, putative, expressed
Npp.02B026910.1	Sspon.02G0008970-2B	Sobic.002G281100.1.p	plastocyanin-like domain containing protein, putative, expressed
Npp.02B026900.1	Sspon.02G0008960-3C	Sobic.004G222000.1.p	aquaporin protein, putative, expressed
Npp.02B026890.1	Sspon.06G0033570-1D	Sobic.006G109200.1.p	expressed protein
Npp.02B026880.1	Sspon.02G0008990-4D	Sobic.002G280900.1.p	la domain containing protein, putative, expressed
Npp.10B017240.1	Sspon.06G0002390-2D	Sobic.007G198500.1.p	BTB/POZ domain containing protein, expressed
Npp.10B017250.1	Sspon.04G0015280-1A	Sobic.010G178600.1.p	coatomer subunit beta, putative, expressed
Npp.01B044850.1	Sspon.01G0037070-1B	Sobic.001G439900.1.p	expressed protein
Npp.01B044840.1	Sspon.03G0045320-1D	Sobic.002G159750.1.p	Sobic.002G159750.1.p
Npp.01B044830.1	Sspon.07G0024610-1B	Sobic.010G251600.1.p	60S acidic ribosomal protein, putative, expressed
Npp.02A010570.1	Sspon.02G0022780-1A	Sobic.002G115400.1.p	AP2 domain containing protein, expressed
Npp.02A010560.1	Sspon.01G0013100-1A	Sobic.001G322500.2.p	trehalase precursor, putative, expressed
Npp.02A010550.1	Sspon.02G0020190-2D	Sobic.002G115200.1.p	cysteine-rich repeat secretory protein precursor, putative, expressed
Npp.10B017320.1	Sspon.08G0006680-4D	Sobic.010G179500.1.p	UDP-glucoronosyl and UDP-glucosyl transferase domain containing protein, expressed
Npp.10B017330.1	Sspon.08G0006670-2B	Sobic.010G179700.1.p	enoyl-CoA hydratase/isomerase family protein, putative, expressed
Npp.10B017300.1	Sspon.08G0006690-4D	Sobic.010G179000.1.p	UDP-glucoronosyl and UDP-glucosyl transferase domain containing protein, expressed
Npp.10B017310.1	Sspon.08G0006680-4D	Sobic.010G179150.1.p	UDP-glucoronosyl and UDP-glucosyl transferase domain containing protein, expressed
Npp.10B017280.1	Sspon.08G0015300-2B	Sobic.010G178700.2.p	transferase family protein, putative, expressed
Npp.10B017290.1	Sspon.08G0006700-3D	Sobic.010G178800.1.p	solute carrier family 35 member B1, putative, expressed
Npp.10B017260.1	Sspon.01G0057740-1D	Sobic.010G178600.1.p	coatomer subunit beta, putative, expressed
Npp.10B017270.1	Sspon.04G0015280-2P	Sobic.004G091500.1.p	receptor-like protein kinase precursor, putative, expressed
Npp.02B028850.1	Sspon.02G0055950-1D	Sobic.002G311700.1.p	anthocyanidin 5,3-O-glucosyltransferase, putative, expressed
Npp.02B028860.1	Sspon.02G0007030-3D	Sobic.002G310600.1.p	chalcone synthase, putative, expressed
Npp.02B028830.1	Sspon.02G0007050-2D	Sobic.002G310500.1.p	chalcone synthase, putative, expressed
Npp.02B028840.1	Sspon.02G0055950-1D	Sobic.002G311700.1.p	anthocyanidin 5,3-O-glucosyltransferase, putative, expressed
Npp.02B028890.1	Sspon.02G0007030-1A	Sobic.002G310600.1.p	chalcone synthase, putative, expressed
Npp.02B028900.1	Sspon.02G0006980-1A	Sobic.006G195900.1.p	sensitivity to red light reduced protein 1, putative, expressed
Npp.02B028870.1	Sspon.02G0007030-1A	Sobic.002G310600.1.p	chalcone synthase, putative, expressed
Npp.02B028880.1	Sspon.02G0035580-2D	Sobic.002G070800.1.p	glucosyltransferase, putative, expressed
Npp.02B028810.1	Sspon.02G0007050-3P	Sobic.002G310500.1.p	chalcone synthase, putative, expressed
Npp.02B028820.1	Sspon.02G0007050-3P	Sobic.002G310500.1.p	chalcone synthase, putative, expressed
Npp.03A024930.1	Sspon.03G0007680-3D	Sobic.003G277700.1.p	phosphotransferase, putative, expressed
Npp.09D010130.1	-	-	retrotransposon protein, putative, unclassified, expressed
Npp.07B022460.1	Sspon.02G0006200-1A	Sobic.002G327500.1.p	TKL_IRAK_DUF26-lc.10 - DUF26 kinases have homology to DUF26 containing loci, expressed
Npp.07B022470.1	Sspon.06G0002340-1A	Sobic.007G200200.1.p	lectin protein kinase family protein, putative, expressed
Npp.02A011320.1	Sspon.02G0019270-1A	Sobic.002G126800.1.p	tetratricopeptide repeat domain containing protein, expressed
Npp.02A011310.1	Sspon.06G0020200-1B	Sobic.007G201100.1.p	oxysterol-binding protein, putative, expressed
Npp.02A011300.1	Sspon.06G0004370-1A	Sobic.002G126800.1.p	tetratricopeptide repeat domain containing protein, expressed
Npp.02A011290.1	Sspon.02G0019300-4D	Sobic.002G126600.1.p	cytochrome P450, putative, expressed
Npp.01A032120.1	Sspon.02G0030350-1A	Sobic.003G048100.1.p	retrotransposon protein, putative, unclassified, expressed
Npp.01A032110.1	Sspon.01G0053410-1C	Sobic.002G161100.1.p	ulp1 protease family, C-terminal catalytic domain containing protein, expressed
Npp.01A032100.1	Sspon.01G0014540-1A	Sobic.001G321200.2.p	armadillo, putative, expressed
Npp.01A032090.1	Sspon.01G0053390-1C	Sobic.001G321400.1.p	CCB2, putative, expressed
Npp.01A032080.1	Sspon.01G0040830-3D	Sobic.001G321500.1.p	OsFBX391 - F-box domain containing protein, expressed
Npp.05B007870.1	Sspon.05G0039390-1D	Sobic.005G058100.1.p	expressed protein
Npp.09C021050.1	Sspon.03G0009670-2P	Sobic.009G234800.1.p	aspartic proteinase oryzasin-1 precursor, putative, expressed
Npp.05C010650.1	Sspon.05G0035170-2D	Sobic.005G073800.2.p	OsFBX411 - F-box domain containing protein, expressed
Npp.10B009660.1	Sspon.08G0010810-3C	Sobic.010G100900.1.p	alanyl-tRNA synthetase, putative, expressed
Npp.02C019150.1	Sspon.02G0015870-2B	Sobic.002G183900.1.p	DUF581 domain containing protein, expressed
Npp.10D007730.1	Sspon.02G0022260-3C	Sobic.002G079900.1.p	tryptophan/tyrosine permease family protein, putative, expressed
Npp.02C019130.1	Sspon.02G0015860-1A	Sobic.002G183700.1.p	L-ascorbate oxidase precursor, putative, expressed
Npp.02C019140.1	Sspon.02G0015880-1A	Sobic.002G183800.1.p	L-ascorbate oxidase precursor, putative, expressed
Npp.10A016050.1	Sspon.07G0018430-1A	Sobic.010G132900.1.p	expressed protein
Npp.10A016040.1	Sspon.08G0006660-1A	Sobic.010G179800.1.p	OsFBK16 - F-box domain and kelch repeat containing protein, expressed
Npp.10D007720.1	Sspon.08G0012370-4D	Sobic.010G074900.1.p	G protein coupled receptor, putative, expressed
Npp.10A016060.1	Sspon.08G0006650-1A	Sobic.010G179900.1.p	transferase family protein, putative, expressed
Npp.01A005790.1	Sspon.01G0030110-1P	Sobic.001G062132.1.p	uclacyanin-2 precursor, putative, expressed
Npp.01A005800.1	Sspon.02G0037410-1B	Sobic.006G107332.1.p	expressed protein
Npp.01A005770.1	Sspon.01G0030110-1P	Sobic.001G062132.1.p	uclacyanin-2 precursor, putative, expressed
Npp.01A005780.1	-	-
Npp.01A005830.1	Sspon.01G0029940-2P	Sobic.001G062500.1.p	aldehyde oxidase, putative, expressed
Npp.01A005840.1	Sspon.01G0029940-2P	Sobic.001G062500.1.p	aldehyde oxidase, putative, expressed
Npp.01A005810.1	Sspon.02G0023800-2B	Sobic.001G062200.2.p	zinc finger A20 and AN1 domain-containing stress-associated protein, putative, expressed
Npp.01A005820.1	Sspon.01G0029940-1P	Sobic.001G062300.1.p	aldehyde oxidase, putative, expressed
Npp.04B008830.1	Sspon.04G0027090-2C	Sobic.003G046700.1.p	expressed protein
Npp.04B008840.1	Sspon.04G0014260-1A	Sobic.004G109000.1.p	chalcone isomerase 3, putative, expressed
Npp.04B008850.1	Sspon.04G0014250-1P	Sobic.004G109100.3.p	zinc finger, C3HC4 type domain containing protein, expressed
Npp.04B008860.1	Sspon.04G0027070-2C	Sobic.004G109200.1.p	zinc finger, C3HC4 type domain containing protein, expressed
Npp.04B008870.1	Sspon.04G0014250-2B	Sobic.004G109300.1.p	zinc finger, C3HC4 type domain containing protein, expressed
Npp.04B008880.1	Sspon.02G0059810-1D	-	OsFBO6 - F-box and other domain containing protein, expressed
Npp.04B008890.1	Sspon.04G0014250-2B	Sobic.004G109400.1.p	zinc finger, C3HC4 type domain containing protein, expressed
Npp.04B008900.1	Sspon.04G0014250-1P	Sobic.004G109400.1.p	zinc finger, C3HC4 type domain containing protein, expressed
Npp.04B008910.1	Sspon.04G0027060-1B	Sobic.004G109600.1.p	zinc finger, C3HC4 type domain containing protein, expressed
Npp.04B008920.1	Sspon.04G0026960-2D	Sobic.004G109700.1.p	zinc finger, C3HC4 type domain containing protein, expressed
Npp.04B010530.1	Sspon.05G0032110-2D	Sobic.002G148350.1.p	expressed protein
Npp.10C016920.1	Sspon.05G0037510-1D	-	retrotransposon protein, putative, unclassified, expressed
Npp.10C016910.1	Sspon.08G0025920-1C	Sobic.010G208100.2.p	two-component response regulator, putative, expressed
Npp.10C016940.1	Sspon.08G0025910-2D	Sobic.010G208400.1.p	OsProCP2 - Putative Lysosomal Pro-x Carboxypeptidase homologue, expressed
Npp.10C016930.1	Sspon.08G0021460-1B	Sobic.010G026100.1.p	retrotransposon protein, putative, unclassified, expressed
Npp.05A003410.1	Sspon.05G0019870-1A	Sobic.005G030400.2.p	cytochrome P450, putative, expressed
Npp.10C016950.1	Sspon.08G0028450-1D	Sobic.010G208600.1.p	OsProCP2 - Putative Lysosomal Pro-x Carboxypeptidase homologue, expressed
Npp.03A029680.1	Sspon.03G0003540-2B	Sobic.003G332700.4.p	Os1bglu5 - beta-glucosidase homologue, similar to G. max isohydroxyurate hydrolase, expressed
Npp.05A003400.1	Sspon.05G0019890-1P	Sobic.005G030300.2.p	protein kinase PKN/PRK1, effector, putative, expressed
Npp.10C016900.1	Sspon.08G0004900-1A	Sobic.010G208000.1.p	ribosomal protein L35, putative, expressed
Npp.10C016890.1	Sspon.08G0004910-1A	Sobic.010G207900.1.p	prenyltransferase, putative, expressed
Npp.08D000230.1	Sspon.05G0036630-1C	Sobic.005G003200.1.p	asparagine synthetase, putative, expressed
Npp.04B010470.1	Sspon.04G0013350-2B	Sobic.004G129900.1.p	MATE efflux family protein, putative, expressed
Npp.09C021060.1	Sspon.07G0021640-2D	Sobic.009G234900.1.p	WRKY43, expressed
Npp.10A001270.1	Sspon.02G0019940-1A	Sobic.005G024500.1.p	expressed protein
Npp.10A001260.1	Sspon.08G0009400-2D	Sobic.010G009466.1.p	PPR repeat domain containing protein, putative, expressed
Npp.08D018210.1	Sspon.02G0032430-4D	Sobic.008G189100.1.p	hydrolase, alpha/beta fold family domain containing protein, expressed
Npp.08D018200.1	Sspon.02G0053140-1C	Sobic.008G189000.1.p	Sobic.008G189000.1.p
Npp.07C001630.1	Sspon.06G0013710-1A	Sobic.007G019000.1.p	40S ribosomal protein S13, putative, expressed
Npp.08D018240.1	Sspon.07G0021170-1B	Sobic.009G250300.1.p	Ser/Thr protein phosphatase family protein, putative, expressed
Npp.08D018230.1	Sspon.02G0032440-4D	Sobic.008G189300.1.p	ubiquitin-conjugating enzyme E2 W, putative, expressed
Npp.08D018220.1	Sspon.02G0032430-1P	Sobic.008G189200.3.p	hydrolase, alpha/beta fold family domain containing protein, expressed
Npp.08D018290.1	Sspon.02G0045930-2C	Sobic.008G189700.1.p	nodulin, putative, expressed
Npp.08D018280.1	Sspon.02G0032460-2B	Sobic.008G189700.1.p	nodulin, putative, expressed
Npp.08D018270.1	Sspon.02G0032460-2B	Sobic.008G189600.1.p	nodulin, putative, expressed
Npp.08D018260.1	Sspon.02G0045920-2D	Sobic.008G189500.1.p	Ser/Thr protein phosphatase family protein, putative, expressed
Npp.10A001210.1	Sspon.08G0009450-1A	Sobic.010G008900.1.p	kinesin motor domain containing protein, expressed
Npp.05D005570.1	Sspon.04G0008240-2D	Sobic.005G057700.1.p	expressed protein
Npp.05D005580.1	Sspon.05G0030260-1B	Sobic.005G055900.1.p	expressed protein
Npp.10A001200.1	Sspon.03G0041960-2D	Sobic.008G069901.1.p	PTHR31973,PTHR31973:SF27
Npp.05D005630.1	Sspon.01G0008870-3C	Sobic.005G056300.1.p	no apical meristem protein, putative, expressed
Npp.05D005640.1	Sspon.05G0018310-3C	Sobic.005G056400.1.p	fructose-bisphospate aldolase isozyme, putative, expressed
Npp.05D005650.1	Sspon.05G0018300-1A	Sobic.005G056500.1.p	integrator complex subunit 3, putative, expressed
Npp.05D005660.1	Sspon.05G0018290-3C	Sobic.005G056600.2.p	CAMK_CAMK_like.43 - CAMK includes calcium/calmodulin depedent protein kinases, expressed
Npp.05D005590.1	Sspon.05G0018330-1A	Sobic.005G056000.2.p	CBS domain-containing protein, putative, expressed
Npp.05D005600.1	Sspon.05G0018330-1A	Sobic.005G056000.2.p	CBS domain-containing protein, putative, expressed
Npp.05D005610.1	Sspon.05G0039640-1D	Sobic.010G206700.1.p	expressed protein
Npp.05D005620.1	Sspon.05G0039640-1D	Sobic.010G206700.1.p	expressed protein
Npp.07A007620.1	Sspon.02G0025090-2D	Sobic.007G073000.1.p	Sobic.007G073000.1.p
Npp.03A036240.1	Sspon.03G0027070-2C	Sobic.003G419900.1.p	photosystem II reaction center PSB28 protein, chloroplast precursor, putative, expressed
Npp.01C032770.1	Sspon.02G0032950-1B	Sobic.001G391300.1.p	glycosyl transferase 8 domain containing protein, putative, expressed
Npp.06C006790.1	Sspon.05G0012640-2C	Sobic.006G054200.1.p	multidrug resistance-associated protein, putative, expressed
Npp.01C032780.1	Sspon.05G0014180-1A	Sobic.010G026100.1.p	retrotransposon protein, putative, unclassified, expressed
Npp.09D021150.1	Sspon.03G0006460-2B	Sobic.009G200100.1.p	GDSL-like lipase/acylhydrolase, putative, expressed
Npp.09D025120.1	-	Sobic.009G217700.1.p	Sobic.009G217700.1.p
Npp.01C034460.1	Sspon.01G0039130-1B	Sobic.001G408600.1.p	RNA pseudouridine synthase, putative, expressed
Npp.01C034450.1	Sspon.01G0058050-1D	Sobic.001G408500.1.p	alpha-taxilin, putative, expressed
Npp.02D008200.1	Sspon.02G0041140-1B	Sobic.002G076100.2.p	transcription factor, putative, expressed
Npp.02D008210.1	Sspon.04G0034040-1P	Sobic.010G176700.1.p	receptor-like protein kinase precursor, putative, expressed
Npp.01A019150.1	Sspon.05G0002220-1A	Sobic.001G437500.1.p	plant protein of unknown function DUF869 domain containing protein, expressed
Npp.01A019140.1	Sspon.07G0024610-1B	-
Npp.01A019130.1	Sspon.05G0032690-1C	Sobic.010G132900.1.p	expressed protein
Npp.03D003620.1	Sspon.03G0022370-1A	Sobic.003G040000.1.p	tRNA synthetase class II core domain containing protein, expressed
Npp.01C034380.1	Sspon.06G0031240-1C	Sobic.001G407800.1.p	leucoanthocyanidin dioxygenase, putative, expressed
Npp.01C034370.1	Sspon.01G0039210-3D	Sobic.001G407600.1.p	omega-3 fatty acid desaturase, chloroplast precursor, putative, expressed
Npp.01C034400.1	Sspon.01G0052260-1C	Sobic.002G430500.1.p	phospholipase C, putative, expressed
Npp.01C034390.1	Sspon.01G0052270-1P	Sobic.001G407900.2.p	rhodanese-like family protein, putative, expressed
Npp.01C034420.1	Sspon.01G0039160-2C	Sobic.001G408200.1.p	CAMK_KIN1/SNF1/Nim1_like_AMPKh.4 - CAMK includes calcium/calmodulin depedent protein kinases, expressed
Npp.01C034410.1	Sspon.01G0052370-2D	Sobic.001G408100.2.p	Yip1 domain containing protein, expressed
Npp.01C034440.1	Sspon.01G0039140-2C	Sobic.001G408400.1.p	phosphatase, putative, expressed
Npp.01C034430.1	Sspon.01G0039150-3D	Sobic.001G408300.1.p	expressed protein
Npp.04D009660.1	Sspon.04G0013250-1A	Sobic.004G127400.1.p	CK1_CaseinKinase_1.4 - CK1 includes the casein kinase 1 kinases, expressed
Npp.10D010430.1	Sspon.04G0002260-1A	Sobic.004G319700.1.p	ethylene-responsive transcription factor, putative, expressed
Npp.03C020510.1	Sspon.03G0032470-3D	Sobic.003G222300.1.p	oxidoreductase, aldo/keto reductase family protein, putative, expressed
Npp.05B000050.1	Sspon.05G0035960-1C	Sobic.005G027840.1.p	Rf1, mitochondrial precursor, putative, expressed
Npp.04D009600.1	Sspon.02G0032580-3D	Sobic.008G191000.1.p	lipoxygenase, putative, expressed
Npp.04D009610.1	Sspon.04G0013190-2B	Sobic.004G126700.1.p	glycosyl hydrolases family 16, putative, expressed
Npp.04D009580.1	Sspon.04G0033280-2D	Sobic.004G125900.1.p	ethylene-responsive protein related, putative, expressed
Npp.05B000010.1	Sspon.03G0015380-2B	Sobic.003G147500.1.p	PHS1, putative, expressed
Npp.03B018040.1	Sspon.03G0011620-2C	Sobic.003G215600.1.p	pleiotropic drug resistance protein, putative, expressed
Npp.03B018050.1	Sspon.03G0032640-2C	Sobic.003G215700.1.p	ATP synthase epsilon chain, mitochondrial, putative, expressed
Npp.03B018060.1	Sspon.03G0011610-3D	Sobic.003G215800.1.p	pleiotropic drug resistance protein, putative, expressed
Npp.03B018070.1	Sspon.03G0032620-2C	Sobic.003G216000.1.p	pleiotropic drug resistance protein, putative, expressed
Npp.02C023920.1	Sspon.02G0055480-1D	Sobic.002G261300.1.p	expressed protein
Npp.03A038310.1	Sspon.03G0025750-1B	Sobic.003G440700.1.p	leucine rich repeat domain containing protein, putative, expressed
Npp.10D026140.1	Sspon.08G0017580-2C	Sobic.010G258600.1.p	pentatricopeptide, putative, expressed
Npp.02B010110.1	Sspon.01G0049510-1B	Sobic.002G091400.1.p	cytochrome P450, putative, expressed
Npp.02B010100.1	Sspon.02G0021460-1T	Sobic.002G091300.1.p	retrotransposon protein, putative, unclassified, expressed
Npp.02B010090.1	-	-
Npp.10D026180.1	Sspon.08G0001770-2C	Sobic.010G259100.2.p	uncharacterized UPF0114 domain containing protein, expressed
Npp.10D026170.1	Sspon.08G0001780-1A	Sobic.010G259001.1.p	Sobic.010G259001.1.p
Npp.10D026160.1	Sspon.08G0001810-3C	Sobic.010G258800.1.p	OsFBX206 - F-box domain containing protein, expressed
Npp.10D026150.1	Sspon.08G0001800-1P	Sobic.010G258700.1.p	arogenate dehydrogenase 1, chloroplast precursor, putative, expressed
Npp.03D009800.1	Sspon.03G0018380-1P	Sobic.003G103701.1.p	phosphatidylinositol 3- and 4-kinase family protein, expressed
Npp.03D009810.1	Sspon.05G0038430-1D	-	expressed protein
Npp.03D009780.1	Sspon.03G0018420-3D	Sobic.003G103300.1.p	1-deoxy-D-xylulose 5-phosphate reductoisomerase, chloroplast precursor, putative, expressed
Npp.03D009790.1	Sspon.07G0026110-1B	Sobic.010G026100.1.p	retrotransposon protein, putative, unclassified, expressed
Npp.03D009760.1	Sspon.03G0018360-2C	Sobic.003G103000.1.p	protein kinase domain containing protein, expressed
Npp.03D009770.1	Sspon.03G0018400-1A	Sobic.003G103200.1.p	pex14, putative, expressed
Npp.10C007800.1	Sspon.06G0008210-3D	Sobic.007G092200.1.p	aspartate carbamoyltransferase, putative, expressed
Npp.10C007810.1	Sspon.06G0008240-1A	Sobic.007G092100.1.p	ADP-ribosylation factor, putative, expressed
Npp.09D011180.1	Sspon.07G0000490-1A	Sobic.009G258400.1.p	adhesion regulating molecule family, putative, expressed
Npp.09C022510.1	Sspon.07G0001110-2B	Sobic.009G248700.1.p	C4-dicarboxylate transporter/malic acid transport protein, expressed
Npp.07C018180.1	-	-
Npp.07C018190.1	Sspon.06G0003430-3C	Sobic.007G184700.1.p	expressed protein
Npp.07C018160.1	Sspon.06G0003460-2B	Sobic.007G184400.1.p	60S ribosomal protein L7, putative, expressed
Npp.07C018170.1	Sspon.06G0003450-2B	Sobic.007G184500.1.p	peptidase, M24 family protein, putative, expressed
Npp.07C018220.1	Sspon.06G0003380-1A	Sobic.007G185200.2.p	CorA-like magnesium transporter protein, putative, expressed
Npp.07C018230.1	Sspon.06G0003400-2B	Sobic.007G185000.2.p	leucine rich repeat protein, putative, expressed
Npp.07C018200.1	Sspon.06G0003420-1A	Sobic.007G184800.1.p	transcription factor RF2a, putative, expressed
Npp.07C018210.1	Sspon.06G0003390-1P	Sobic.007G185100.1.p	peptidyl-prolyl cis-trans isomerase, FKBP-type, putative, expressed
Npp.07C018240.1	Sspon.06G0003390-1P	Sobic.007G185100.1.p	peptidyl-prolyl cis-trans isomerase, FKBP-type, putative, expressed
Npp.07C018250.1	Sspon.06G0003380-1A	Sobic.007G185200.2.p	CorA-like magnesium transporter protein, putative, expressed
Npp.02D000960.1	Sspon.02G0025900-2B	Sobic.002G008400.1.p	flavin-containing monooxygenase family protein, putative, expressed
Npp.02D000950.1	Sspon.02G0043450-2C	Sobic.004G168432.1.p	expressed protein
Npp.02D001000.1	Sspon.02G0043320-3D	Sobic.002G009700.2.p	AMP-binding domain containing protein, expressed
Npp.02D000990.1	Sspon.02G0043320-3D	Sobic.002G009600.1.p	AMP-binding domain containing protein, expressed
Npp.02D000980.1	Sspon.02G0025860-3C	Sobic.002G009300.1.p	expressed protein
Npp.02D000970.1	Sspon.02G0025870-2C	Sobic.002G009200.1.p	calmodulin binding;purine nucleotide binding
Npp.02B001310.1	Sspon.02G0025780-3C	Sobic.002G009900.1.p	phytosulfokine receptor precursor, putative, expressed
Npp.02B001300.1	Sspon.01G0028510-1P	Sobic.002G010000.1.p	NLI interacting factor-like phosphatase, putative, expressed
Npp.02D001020.1	Sspon.01G0030860-3D	Sobic.001G045500.1.p	expressed protein
Npp.02D001010.1	Sspon.02G0025830-4D	Sobic.002G009800.1.p	VIP4, putative, expressed
Npp.09A015870.1	Sspon.07G0006580-1A	Sobic.009G160100.3.p	amino acid kinase, putative, expressed
Npp.02A019190.1	Sspon.02G0000050-1A	Sobic.002G233300.1.p	plastocyanin-like domain containing protein, putative, expressed
Npp.09A015890.1	Sspon.07G0006560-4D	Sobic.009G160600.1.p	Yip1 domain containing protein, expressed
Npp.09A015900.1	Sspon.07G0006550-3D	Sobic.009G160700.1.p	mitochondrial glycoprotein, putative, expressed
Npp.09A015910.1	Sspon.07G0023320-1B	Sobic.009G160800.1.p	oxidoreductase, aldo/keto reductase family protein, putative, expressed
Npp.03B020430.1	Sspon.03G0010120-4D	Sobic.003G240000.1.p	DUF538 domain containing protein, putative, expressed
Npp.09A015930.1	Sspon.07G0006540-1A	Sobic.009G161000.1.p	oxidoreductase, aldo/keto reductase family protein, putative, expressed
Npp.02A019180.1	Sspon.02G0012710-3D	Sobic.002G233200.1.p	plastocyanin-like domain containing protein, putative, expressed
Npp.09A015950.1	-	-
Npp.09A015960.1	Sspon.07G0006500-3D	Sobic.009G161200.1.p	membrane associated DUF588 domain containing protein, putative, expressed
Npp.03B020420.1	Sspon.03G0010130-3C	Sobic.003G239900.1.p	ketol-acid reductoisomerase, chloroplast precursor, putative, expressed
Npp.02A019210.1	Sspon.02G0012730-1A	Sobic.002G233500.1.p	plastocyanin-like domain containing protein, putative, expressed
Npp.02A019200.1	Sspon.02G0012720-1A	Sobic.002G233400.1.p	plastocyanin-like domain containing protein, putative, expressed
Npp.08C003620.1	Sspon.07G0034730-2D	Sobic.008G029300.1.p	CBS domain containing membrane protein, putative, expressed
Npp.02D021500.1	Sspon.02G0044460-1B	-
Npp.02D021490.1	Sspon.02G0037720-1B	Sobic.002G213200.1.p	expressed protein
Npp.03B019530.1	Sspon.03G0003140-2C	-	trp repressor/replication initiator, putative, expressed
Npp.03B019540.1	Sspon.03G0003130-2C	Sobic.001G281400.1.p	expressed protein
Npp.03A000960.1	Sspon.07G0006500-1A	Sobic.003G012700.1.p	40S ribosomal protein S15a, putative, expressed
Npp.08C004810.1	Sspon.07G0018870-2B	Sobic.008G043800.1.p	expressed protein
Npp.01C032760.1	Sspon.01G0058260-1D	Sobic.001G391200.1.p	ABC transporter, ATP-binding protein, putative, expressed
Npp.07D014830.1	Sspon.06G0020870-3D	Sobic.007G166600.1.p	copper/zinc superoxide dismutase, putative, expressed
Npp.07D000310.1	Sspon.06G0013470-2B	Sobic.007G003100.2.p	transmembrane protein 18, putative, expressed
Npp.07D014850.1	Sspon.06G0020860-3D	Sobic.007G166900.1.p	auxin-induced protein 5NG4, putative, expressed
Npp.02D021510.1	Sspon.08G0020380-1B	Sobic.004G338701.1.p	expressed protein
Npp.07D014870.1	Sspon.06G0020810-1B	Sobic.007G167000.1.p	EF hand family protein, putative, expressed
Npp.07D014880.1	Sspon.06G0004500-2B	Sobic.007G167100.1.p	expressed protein
Npp.07D014890.1	Sspon.06G0004490-1A	Sobic.007G167200.2.p	OsSCP41 - Putative Serine Carboxypeptidase homologue, expressed
Npp.07D000300.1	Sspon.06G0013480-1P	Sobic.007G003000.1.p	no apical meristem protein, putative, expressed
Npp.05C022600.1	Sspon.06G0027380-1B	Sobic.005G216400.1.p	plant protein of unknown function domain containing protein, expressed
Npp.05C022590.1	Sspon.06G0018700-2C	Sobic.005G216600.1.p	plant protein of unknown function domain containing protein, expressed
Npp.05C022580.1	Sspon.01G0058520-1D	-	expressed protein
Npp.05C022570.1	Sspon.03G0040280-1P	Sobic.003G331700.1.p	thaumatin, putative, expressed
Npp.05C022560.1	Sspon.06G0027370-1B	Sobic.005G215900.1.p	BBTI13 - Bowman-Birk type bran trypsin inhibitor precursor, expressed
Npp.05C022550.1	Sspon.06G0031390-1C	Sobic.005G215500.1.p	BBTI13 - Bowman-Birk type bran trypsin inhibitor precursor, expressed
Npp.05C022540.1	Sspon.06G0027370-2C	Sobic.005G215400.1.p	BBTI13 - Bowman-Birk type bran trypsin inhibitor precursor, expressed
Npp.05C022530.1	Sspon.06G0017750-2P	Sobic.005G215300.1.p	laccase-15 precursor, putative, expressed
Npp.05C022520.1	Sspon.06G0027360-1B	Sobic.005G215200.2.p	plant viral response family protein, putative, expressed
Npp.03A020900.1	Sspon.03G0032470-2C	Sobic.003G222200.1.p	oxidoreductase, aldo/keto reductase family protein, putative, expressed
Npp.03A020870.1	Sspon.03G0032470-2C	Sobic.003G222200.1.p	oxidoreductase, aldo/keto reductase family protein, putative, expressed
Npp.03A020880.1	Sspon.03G0032440-1B	Sobic.003G222300.1.p	oxidoreductase, aldo/keto reductase family protein, putative, expressed
Npp.03A020930.1	-	-	transposon protein, putative, CACTA, En/Spm sub-class, expressed
Npp.03A020940.1	Sspon.03G0032460-1B	Sobic.003G222400.1.p	protein phosphatase 2C, putative, expressed
Npp.03A020910.1	Sspon.03G0032440-1B	Sobic.003G222300.1.p	oxidoreductase, aldo/keto reductase family protein, putative, expressed
Npp.03A020920.1	Sspon.03G0032440-3D	Sobic.003G222300.1.p	oxidoreductase, aldo/keto reductase family protein, putative, expressed
Npp.08A013250.1	-	-
Npp.01A024750.1	Sspon.06G0029870-2D	Sobic.001G249300.2.p	Cf2/Cf5 disease resistance protein, putative, expressed
Npp.01A024740.1	Sspon.03G0014770-1A	-	expressed protein
Npp.04B004860.1	Sspon.06G0004930-3C	Sobic.007G152600.1.p	cytochrome P450, putative, expressed
Npp.03B004860.1	Sspon.05G0007180-1A	Sobic.001G474500.4.p	mitochondrial carrier protein, putative, expressed
Npp.04B004840.1	Sspon.06G0004930-2P	Sobic.007G152600.1.p	cytochrome P450, putative, expressed
Npp.04B004830.1	Sspon.08G0004010-2C	Sobic.001G243901.1.p	expressed protein
Npp.04B004820.1	Sspon.03G0000330-1A	Sobic.003G198000.2.p	transposon protein, putative, unclassified, expressed
Npp.09D007990.1	Sspon.03G0017870-1A	Sobic.010G026100.1.p	retrotransposon protein, putative, unclassified, expressed
Npp.01A024670.1	Sspon.01G0017960-3D	Sobic.001G248300.1.p	OsPOP21 - Putative Prolyl Oligopeptidase homologue, expressed
Npp.03B033110.1	Sspon.03G0039290-1C	Sobic.003G400800.1.p	peptidyl-prolyl cis-trans isomerase, FKBP-type, putative, expressed
Npp.10A008870.1	Sspon.08G0011140-1P	Sobic.010G093100.1.p	galactosyltransferase family protein, putative, expressed
Npp.10A008880.1	Sspon.08G0021790-2D	Sobic.010G093200.1.p	expressed protein
Npp.01A024710.1	Sspon.01G0017890-2B	Sobic.001G249000.1.p	transmembrane amino acid transporter protein, putative, expressed
Npp.01A024700.1	Sspon.01G0017900-4D	Sobic.001G248900.1.p	exocyst complex component 6, putative, expressed
Npp.01A024730.1	Sspon.01G0017870-1P	Sobic.001G249200.1.p	KH domain containing protein, putative, expressed
Npp.01A024720.1	Sspon.01G0017880-3C	Sobic.001G249100.1.p	expressed protein
Npp.09B020950.1	Sspon.04G0001530-3D	Sobic.002G202400.1.p	CAF1 family ribonuclease containing protein, putative, expressed
Npp.09B020940.1	Sspon.03G0009420-2D	Sobic.009G233000.1.p	homeobox domain containing protein, expressed
Npp.09B020930.1	Sspon.03G0009350-2P	Sobic.009G232900.1.p	ras-related protein, putative, expressed
Npp.09B020920.1	Sspon.03G0009400-2B	Sobic.009G232800.1.p	zinc finger, C3HC4 type domain containing protein, expressed
Npp.02A010580.1	Sspon.02G0020170-2B	Sobic.002G115600.1.p	membrane protein, putative, expressed
Npp.04A016720.1	Sspon.02G0021700-3D	Sobic.002G009100.2.p	expressed protein
Npp.04A016710.1	Sspon.02G0021700-3D	Sobic.002G009100.2.p	expressed protein
Npp.04A016700.1	Sspon.02G0021700-3D	Sobic.002G009100.2.p	expressed protein
Npp.02A010600.1	Sspon.02G0050770-1C	Sobic.002G115700.1.p	chalcone and stilbene synthases, putative, expressed
Npp.02A010590.1	Sspon.02G0040140-1B	Sobic.002G115900.1.p	homeobox and START domains containing protein, putative, expressed
Npp.02B004780.1	Sspon.02G0037410-1B	Sobic.006G107332.1.p	expressed protein
Npp.02B004790.1	Sspon.02G0052000-1C	Sobic.002G036300.1.p	expressed protein
Npp.02B004760.1	Sspon.01G0029740-3P	Sobic.002G035900.1.p	glycine-rich protein, putative, expressed
Npp.02B004770.1	Sspon.02G0042480-2D	Sobic.002G036000.4.p	hydroxyacid oxidase 1, putative, expressed
Npp.02B004740.1	Sspon.02G0024020-1A	Sobic.002G035800.1.p	ZOS10-03 - C2H2 zinc finger protein, expressed
Npp.02B004750.1	Sspon.06G0028070-1C	Sobic.003G206800.2.p	DUF538 domain containing protein, putative, expressed
Npp.03B020030.1	Sspon.03G0010390-1A	Sobic.009G242501.1.p	DUF617 domain containing protein, expressed
Npp.02B004730.1	Sspon.02G0024030-2B	Sobic.001G258300.1.p	GDSL-like lipase/acylhydrolase, putative, expressed
Npp.03B020050.1	Sspon.03G0010360-2B	Sobic.003G235800.1.p	auxin efflux carrier component, putative, expressed
Npp.03B020040.1	Sspon.03G0010370-1A	Sobic.003G235700.1.p	single-stranded DNA-binding protein, putative, expressed
Npp.04C007880.1	Sspon.04G0027930-1B	Sobic.004G082700.1.p	PPR repeat containing protein, expressed
Npp.04C007890.1	Sspon.08G0006130-3P	Sobic.004G082800.1.p	GRAM and C2 domains containing protein, putative, expressed
Npp.04C007920.1	Sspon.04G0015580-2C	Sobic.004G083100.1.p	glycosyl hydrolases family 17, putative, expressed
Npp.04C007930.1	Sspon.04G0027870-1B	Sobic.004G083200.1.p	targeting protein for Xklp2, putative, expressed
Npp.04C007900.1	Sspon.04G0015600-2C	Sobic.004G082900.1.p	26S protease regulatory subunit, putative, expressed
Npp.04C007910.1	Sspon.04G0015590-1A	Sobic.004G083000.1.p	CRAL/TRIO domain containing protein, expressed
Npp.04C007960.1	Sspon.04G0027860-1B	Sobic.004G083600.1.p	hsp20/alpha crystallin family protein, putative, expressed
Npp.04C007970.1	Sspon.04G0036800-1D	Sobic.004G083700.1.p	expressed protein
Npp.04C007940.1	Sspon.08G0006270-4P	Sobic.004G083300.1.p	OsFBL7 - F-box domain and LRR containing protein, expressed
Npp.04C007950.1	Sspon.04G0015570-2C	Sobic.004G083500.1.p	O-methyltransferase, putative, expressed
Npp.06C017450.1	Sspon.05G0006530-4D	Sobic.006G157400.1.p	syntaxin-18, putative, expressed
Npp.09C005140.1	Sspon.07G0032670-2D	Sobic.009G045400.1.p	DEAD-box ATP-dependent RNA helicase, putative, expressed
Npp.06C017460.1	Sspon.05G0006540-1A	Sobic.006G157500.1.p	zinc finger, C3HC4 type domain containing protein, expressed
Npp.03B003560.1	Sspon.02G0032970-1B	Sobic.002G247900.1.p	hypothetical protein
Npp.06C017430.1	Sspon.05G0006490-2B	Sobic.006G157100.1.p	sphingolipid delta desaturase, putative, expressed
Npp.05A017820.1	Sspon.06G0015430-2B	Sobic.005G153900.2.p	expressed protein
Npp.05A017830.1	Sspon.06G0025490-1B	Sobic.005G154000.1.p	thioredoxin reductase 2, putative, expressed
Npp.06C017440.1	Sspon.05G0006520-2C	Sobic.001G168000.1.p	OsFBD13 - F-box and FBD domain containing protein, expressed
Npp.05A017900.1	Sspon.06G0015490-2C	Sobic.005G154500.3.p	OsFBX407 - F-box domain containing protein, expressed
Npp.05A017910.1	Sspon.05G0023270-1B	Sobic.001G255001.1.p	expressed protein
Npp.05A017880.1	Sspon.06G0015500-3C	Sobic.005G154800.1.p	OsWAK98 - OsWAK receptor-like cytoplasmic kinase OsWAK-RLCK, expressed
Npp.05A017890.1	Sspon.06G0015460-3D	-	trp repressor/replication initiator, putative, expressed
Npp.05A017860.1	Sspon.06G0015500-3C	Sobic.005G154800.1.p	OsWAK98 - OsWAK receptor-like cytoplasmic kinase OsWAK-RLCK, expressed
Npp.05A017870.1	Sspon.06G0015500-3C	Sobic.005G154800.1.p	OsWAK98 - OsWAK receptor-like cytoplasmic kinase OsWAK-RLCK, expressed
Npp.05A017840.1	Sspon.06G0015440-2C	Sobic.005G154100.1.p	OsWAK98 - OsWAK receptor-like cytoplasmic kinase OsWAK-RLCK, expressed
Npp.05A017850.1	Sspon.06G0015440-2C	Sobic.005G154100.1.p	OsWAK98 - OsWAK receptor-like cytoplasmic kinase OsWAK-RLCK, expressed
Npp.01D027170.1	Sspon.05G0024400-1B	Sobic.006G155400.1.p	expressed protein
Npp.01D027160.1	Sspon.01G0008510-2P	Sobic.001G389900.1.p	aquaporin SIP2-1, putative, expressed
Npp.01D027190.1	Sspon.07G0005270-4D	Sobic.001G390300.1.p	OsCam1-1 - Calmodulin, expressed
Npp.01D027180.1	Sspon.02G0000740-2C	Sobic.001G390200.1.p	CAMK_KIN1/SNF1/Nim1_like.2 - CAMK includes calcium/calmodulin depedent protein kinases, expressed
Npp.01D027210.1	Sspon.01G0052740-2D	Sobic.001G390500.1.p	SNF1-related protein kinase regulatory subunit beta-1, putative, expressed
Npp.01D027200.1	Sspon.01G0058290-1D	Sobic.001G390400.1.p	expressed protein
Npp.01D027230.1	Sspon.02G0038610-2C	Sobic.001G530700.1.p	transporter family protein, putative, expressed
Npp.01D027220.1	Sspon.01G0008480-1A	Sobic.003G204100.1.p	expressed protein
Npp.01D027250.1	Sspon.01G0008420-1P	Sobic.001G391000.1.p	aspartic proteinase nepenthesin precursor, putative, expressed
Npp.01D027240.1	Sspon.01G0008450-2D	Sobic.001G390900.2.p	glucose-6-phosphate 1-dehydrogenase, chloroplast precursor, putative, expressed
Npp.09B021380.1	Sspon.07G0021450-2C	Sobic.009G238100.2.p	ubiquitin carboxyl-terminal hydrolase, family 1, putative, expressed
Npp.06C017480.1	Sspon.05G0006550-4D	Sobic.006G157700.1.p	glycosyl hydrolase family 3 protein, putative, expressed
Npp.09B021440.1	Sspon.07G0001720-2C	Sobic.004G091300.1.p	receptor-like protein kinase precursor, putative, expressed
Npp.09B021450.1	Sspon.02G0045550-1B	-	expressed protein
Npp.09B021420.1	Sspon.03G0009980-1P	Sobic.009G238600.1.p	protein phosphatase 2C, putative, expressed
Npp.09B021430.1	Sspon.02G0024430-1A	-
Npp.08A001280.1	Sspon.07G0016910-1A	Sobic.008G010400.1.p	peroxidase precursor, putative, expressed
Npp.08A001270.1	-	-
Npp.09B022160.1	Sspon.03G0010740-1P	Sobic.009G246300.1.p	CGMC_MAPKCMGC_2.4 - CGMC includes CDA, MAPK, GSK3, and CLKC kinases, expressed
Npp.09B022150.1	Sspon.03G0018580-2B	Sobic.003G119750.1.p	hypothetical protein
Npp.01D036540.1	Sspon.01G0050970-1C	Sobic.001G499000.2.p	BTBP1 - Bric-a-Brac, Tramtrack, Broad Complex BTB domain with pentapeptide repeats, expressed
Npp.01D036530.1	Sspon.01G0003260-1P	Sobic.001G498900.1.p	expressed protein
Npp.09B022200.1	Sspon.02G0031530-1A	Sobic.008G172000.2.p	expressed protein
Npp.09B022190.1	Sspon.02G0031520-2B	Sobic.008G172100.1.p	ribosomal protein, putative, expressed
Npp.08A001200.1	Sspon.06G0033200-1D	Sobic.008G088878.1.p	TPD1, putative, expressed
Npp.08A001190.1	Sspon.07G0035010-1C	Sobic.003G084900.2.p	expressed protein
Npp.08A001220.1	Sspon.07G0028200-1B	Sobic.003G210500.1.p	leucine rich repeat protein, putative, expressed
Npp.01C032820.1	Sspon.01G0038440-3P	Sobic.001G391500.1.p	MYB family transcription factor, putative, expressed
Npp.08A001240.1	Sspon.07G0016900-2C	Sobic.006G177500.1.p	CAMK_CAMK_like.26 - CAMK includes calcium/calmodulin depedent protein kinases, expressed
Npp.08A001230.1	Sspon.02G0037410-1B	Sobic.006G177500.1.p	CAMK_CAMK_like.26 - CAMK includes calcium/calmodulin depedent protein kinases, expressed
Npp.08A001260.1	Sspon.05G0036450-1C	Sobic.005G011400.1.p	expressed protein
Npp.08A001250.1	Sspon.05G0021250-2B	Sobic.008G010200.1.p	expressed protein
Npp.09D012780.1	Sspon.07G0009240-4D	Sobic.010G182200.2.p	elongation factor Tu, putative, expressed
Npp.09D012790.1	Sspon.07G0009240-6P	Sobic.010G182200.2.p	elongation factor Tu, putative, expressed
Npp.07B008690.1	Sspon.06G0010720-3D	Sobic.007G051700.1.p	lissencephaly type-1-like homology motif, putative, expressed
Npp.07B008700.1	Sspon.06G0010740-2C	Sobic.007G051800.1.p	basic helix-loop-helix family protein, putative, expressed
Npp.09D012770.1	Sspon.07G0009240-6P	Sobic.010G182200.2.p	elongation factor Tu, putative, expressed
Npp.07B008650.1	Sspon.06G0010780-1A	Sobic.007G051100.1.p	secretory carrier-associated membrane protein 5, putative, expressed
Npp.07B008660.1	Sspon.06G0010770-2D	Sobic.007G051200.1.p	cytidylyltransferase domain containing protein, expressed
Npp.07B008670.1	Sspon.06G0010760-1A	Sobic.007G051300.1.p	dnaJ domain containing protein, expressed
Npp.07B008680.1	Sspon.06G0013770-1A	Sobic.007G051400.1.p	transmembrane 9 superfamily member, putative, expressed
Npp.07B008610.1	Sspon.06G0010820-3C	Sobic.007G050600.1.p	CSLF6 - cellulose synthase-like family F; beta1,3;1,4 glucan synthase, expressed
Npp.07B008620.1	Sspon.06G0010800-2B	Sobic.007G050800.1.p	abhydrolase domain-containing protein FAM108C1, putative, expressed
Npp.07B008630.1	Sspon.08G0008700-1A	Sobic.010G026100.1.p	retrotransposon protein, putative, unclassified, expressed
Npp.07B008640.1	Sspon.06G0010790-2B	Sobic.007G051000.1.p	mitochondrial NADH-ubiquinone oxidoreductase, putative, expressed
Npp.09D012750.1	Sspon.05G0015910-2B	Sobic.009G118100.1.p	expressed protein
Npp.09D012710.1	Sspon.06G0000010-1A	Sobic.001G018350.1.p	RD26, putative, expressed
Npp.05B009720.1	Sspon.03G0046370-1D	-	zinc knuckle family protein, putative, expressed
Npp.05B009730.1	Sspon.05G0034980-2D	Sobic.004G288200.1.p	receptor kinase, putative, expressed
Npp.05B009740.1	Sspon.05G0034980-1C	Sobic.004G288200.1.p	receptor kinase, putative, expressed
Npp.05B009750.1	Sspon.05G0034990-1C	Sobic.005G077800.4.p	OsFBX411 - F-box domain containing protein, expressed
Npp.05B009760.1	-	-
Npp.05B009770.1	Sspon.05G0039510-1D	Sobic.003G200400.1.p	histone deacetylase 19, putative, expressed
Npp.05B009780.1	Sspon.05G0017280-1A	Sobic.005G105600.1.p	stripe rust resistance protein Yr10, putative, expressed
Npp.05B009790.1	Sspon.01G0003210-1A	-	expressed protein
Npp.05B009800.1	Sspon.05G0039510-1D	Sobic.005G079400.1.p	histone deacetylase 19, putative, expressed
Npp.05B009810.1	Sspon.05G0017280-1A	Sobic.005G105600.1.p	stripe rust resistance protein Yr10, putative, expressed
Npp.08A008880.1	Sspon.01G0001820-1A	Sobic.003G436400.1.p	plasma membrane ATPase, putative, expressed
Npp.08A008890.1	Sspon.03G0037980-1C	Sobic.005G083800.1.p	expressed protein
Npp.08A008860.1	Sspon.01G0058510-1D	Sobic.001G255001.1.p	expressed protein
Npp.08A008870.1	Sspon.03G0025990-2C	Sobic.003G436600.1.p	expressed protein
Npp.08A008920.1	Sspon.07G0029630-1B	Sobic.003G436000.1.p	expressed protein
Npp.08A008930.1	Sspon.07G0018560-2D	Sobic.008G082000.2.p	RWP-RK domain-containing protein, putative, expressed
Npp.06A003930.1	Sspon.05G0026960-1B	Sobic.006G038500.1.p	tRNA-dihydrouridine synthase, putative, expressed
Npp.06A003950.1	Sspon.05G0026930-1B	Sobic.006G037700.1.p	phosphoribulokinase/Uridine kinase family protein, expressed
Npp.06A003960.1	Sspon.05G0026920-1B	Sobic.006G037700.1.p	phosphoribulokinase/Uridine kinase family protein, expressed
Npp.03B016640.1	Sspon.03G0033120-1B	-
Npp.06A003980.1	Sspon.05G0013390-1P	Sobic.006G037300.1.p	membrane associated DUF588 domain containing protein, putative, expressed
Npp.06A003990.1	Sspon.08G0027960-1D	Sobic.005G143800.1.p	expressed protein
Npp.06A004000.1	Sspon.07G0018740-2D	-	expressed protein
Npp.06A004010.1	Sspon.02G0057260-1D	Sobic.008G179700.1.p	TATA-binding protein, putative, expressed
Npp.06A004020.1	Sspon.04G0024120-1B	-
Npp.03B016630.1	Sspon.03G0012900-1A	Sobic.003G193800.1.p	calmodulin-binding protein, putative, expressed
Npp.06A007980.1	Sspon.05G0038670-1D	Sobic.006G084100.1.p	expressed protein
Npp.06A007970.1	Sspon.05G0011160-3D	Sobic.006G084000.1.p	CDK5RAP1, putative, expressed
Npp.06A008000.1	Sspon.05G0011150-2C	Sobic.006G084300.1.p	kinesin motor domain containing protein, putative, expressed
Npp.06A007990.1	Sspon.05G0025730-1B	Sobic.008G073200.3.p	ZF-HD protein dimerisation region containing protein, expressed
Npp.06A008020.1	Sspon.05G0011120-1A	Sobic.006G084500.1.p	expressed protein
Npp.06A008010.1	Sspon.04G0010390-3P	Sobic.006G084400.1.p	OsAPx7 - Stromal Ascorbate Peroxidase encoding gene 5,8, expressed
Npp.09A002390.1	Sspon.07G0014890-2D	Sobic.009G021600.1.p	Jacalin-like lectin domain containing protein, putative, expressed
Npp.09A002400.1	Sspon.07G0015880-1A	Sobic.008G050800.1.p	expressed protein
Npp.08D010800.1	Sspon.02G0027720-2B	Sobic.008G111100.1.p	transporter family protein, putative, expressed
Npp.03B016620.1	Sspon.03G0012910-1A	Sobic.003G193700.1.p	carbamoyl-phosphate synthase large chain, putative, expressed
Npp.05A000050.1	Sspon.05G0021560-3D	Sobic.005G002100.1.p	protein kinase domain containing protein, expressed
Npp.05A000040.1	Sspon.05G0005040-1A	Sobic.006G067300.1.p	OsFBX103 - F-box domain containing protein, expressed
Npp.03C018900.1	Sspon.08G0014910-1A	Sobic.003G193600.1.p	expressed protein
Npp.02A009830.1	Sspon.06G0010850-1A	Sobic.002G105000.1.p	OsFBD15 - F-box and FBD domain containing protein, expressed
Npp.02A009840.1	Sspon.02G0057640-1D	-
Npp.02A009810.1	Sspon.02G0036700-1B	-
Npp.02A009820.1	Sspon.06G0010850-2B	Sobic.002G105000.1.p	OsFBD15 - F-box and FBD domain containing protein, expressed
Npp.02A009790.1	Sspon.02G0020880-3P	Sobic.002G104801.1.p	B12D protein, putative, expressed
Npp.02A009800.1	Sspon.02G0020880-3D	Sobic.002G104900.1.p	B12D protein, putative, expressed
Npp.02A009770.1	Sspon.05G0032110-1C	Sobic.007G101100.2.p	Sobic.007G101100.2.p
Npp.02A009780.1	Sspon.03G0007290-3C	Sobic.003G051200.1.p	Complex I intermediate-associated protein 30 domain containing protein, putative, expressed
Npp.02A009750.1	Sspon.02G0020890-3C	Sobic.002G104700.1.p	expressed protein
Npp.02A009760.1	-	-
Npp.03D025130.1	Sspon.03G0008600-1A	Sobic.003G263001.1.p	Protein kinase domain containing protein, expressed
Npp.03D025140.1	Sspon.03G0008600-1A	Sobic.003G263100.1.p	Protein kinase domain containing protein, expressed
Npp.06D025490.1	Sspon.02G0021280-2C	Sobic.006G278200.1.p	RNA-binding region RNP-1, putative, expressed
Npp.09A002040.1	Sspon.07G0015460-3C	Sobic.009G016100.1.p	endonuclease/exonuclease/phosphatase family domain containing protein, expressed
Npp.01C004400.1	Sspon.01G0048370-1B	Sobic.001G044200.2.p	uncharacterized 50.6 kDa protein in the 5region of gyrA and gyrB, putative, expressed
Npp.01C004410.1	Sspon.01G0048370-2D	Sobic.001G044300.7.p	transcription factor, putative, expressed
Npp.07D003630.1	Sspon.06G0011670-1T	Sobic.007G035300.1.p	decarboxylase, putative, expressed
Npp.07D003620.1	Sspon.06G0030640-2D	Sobic.007G035500.1.p	decarboxylase, putative, expressed
Npp.01B025540.1	Sspon.01G0042590-1B	Sobic.007G053500.2.p	mps one binder kinase activator-like 1A, putative, expressed
Npp.01B025550.1	Sspon.01G0058790-1D	Sobic.006G036000.1.p	expressed protein
Npp.01B025560.1	Sspon.07G0037650-1D	Sobic.002G148350.1.p	expressed protein
Npp.02D017840.1	Sspon.05G0032110-2D	Sobic.002G148350.1.p	expressed protein
Npp.02B000550.1	Sspon.02G0026460-2B	Sobic.002G003800.1.p	plastocyanin-like domain containing protein, putative, expressed
Npp.02D017810.1	-	-
Npp.02B000530.1	Sspon.02G0021920-1A	Sobic.002G003500.1.p	peroxidase precursor, putative, expressed
Npp.01C004390.1	Sspon.02G0023040-4D	Sobic.001G044000.1.p	DNA-binding storekeeper protein-related, putative, expressed
Npp.08D014910.1	Sspon.02G0030220-2C	Sobic.008G150000.1.p	G-protein alpha subunit, putative, expressed
Npp.08D014920.1	Sspon.03G0044850-1D	Sobic.002G120601.1.p	expressed protein
Npp.08D014970.1	Sspon.01G0045530-2D	Sobic.008G150400.1.p	WD-40 repeat family protein, putative, expressed
Npp.08D014980.1	Sspon.02G0030280-1A	Sobic.008G150500.2.p	expressed protein
Npp.08D014990.1	Sspon.02G0054160-2D	Sobic.008G150700.1.p	protein kinase domain containing protein, expressed
Npp.08D015000.1	Sspon.02G0054090-2D	Sobic.008G150800.1.p	Cf-4A protein, putative, expressed
Npp.08D014930.1	Sspon.02G0030240-1A	Sobic.008G150100.1.p	resistance protein, putative, expressed
Npp.08D014940.1	Sspon.02G0030250-2C	Sobic.008G150200.1.p	PPR repeat domain containing protein, putative, expressed
Npp.08D014950.1	Sspon.02G0030260-2C	Sobic.008G150300.1.p	Lg106, putative, expressed
Npp.08D014960.1	Sspon.01G0045530-2D	Sobic.008G150400.1.p	WD-40 repeat family protein, putative, expressed
Npp.03C010670.1	Sspon.03G0035320-1B	Sobic.003G108300.2.p	expressed protein
Npp.03C010660.1	Sspon.03G0018090-2B	Sobic.003G108100.1.p	expressed protein
Npp.03C010650.1	Sspon.03G0018080-2B	Sobic.003G108000.1.p	expressed protein
Npp.03C010640.1	Sspon.03G0018070-2B	Sobic.003G107900.1.p	phosphoesterase family protein, putative, expressed
Npp.03C010710.1	Sspon.03G0043200-1C	Sobic.003G431100.1.p	glycosyltransferase, putative, expressed
Npp.03C010700.1	Sspon.03G0035270-3D	Sobic.003G108500.1.p	glycosyltransferase, putative, expressed
Npp.03C010690.1	Sspon.03G0018050-1P	Sobic.001G424000.2.p	fringe-related protein, putative, expressed
Npp.03C010680.1	Sspon.08G0015990-2B	Sobic.010G027500.1.p	kinesin motor domain containing protein, expressed
Npp.09D005810.1	Sspon.04G0033190-1C	Sobic.004G267200.1.p	expressed protein
Npp.03C010630.1	Sspon.03G0018060-2B	Sobic.003G107800.1.p	expressed protein
Npp.03C010620.1	Sspon.03G0018150-3D	Sobic.003G107700.1.p	expressed protein
Npp.09D005800.1	Sspon.07G0026090-3D	Sobic.009G050500.1.p	nifU, putative, expressed
Npp.10A012020.1	Sspon.08G0027060-1C	Sobic.010G129450.1.p	expressed protein
Npp.10A012030.1	Sspon.05G0029480-1B	Sobic.004G139400.2.p	Sobic.004G139400.2.p
Npp.10A012040.1	Sspon.08G0021240-1B	Sobic.010G129300.1.p	aspartic proteinase nepenthesin-2 precursor, putative, expressed
Npp.10A012050.1	Sspon.08G0004040-2C	Sobic.002G011200.2.p	expressed protein
Npp.10A012060.1	Sspon.01G0002430-1A	Sobic.002G011200.2.p	expressed protein
Npp.10A012070.1	-	-
Npp.10A012080.1	Sspon.02G0043430-1B	Sobic.002G007800.1.p	transcription factor jumonji, putative, expressed
Npp.10A012090.1	Sspon.02G0043410-2D	Sobic.002G007700.1.p	nodulin family protein, putative, expressed
Npp.10D019300.1	Sspon.04G0007190-1A	Sobic.002G098300.1.p	expressed protein
Npp.10D019290.1	Sspon.08G0006390-1A	Sobic.010G184600.1.p	heme oxygenase 1, putative, expressed
Npp.10D019280.1	Sspon.08G0006400-1A	Sobic.010G184500.1.p	NADP-dependent oxidoreductase, putative, expressed
Npp.10D019270.1	Sspon.08G0006410-1A	Sobic.010G184400.1.p	SMP-30/Gluconolaconase/LRE-like region containing protein, expressed
Npp.10D019340.1	Sspon.08G0006290-2B	Sobic.010G185400.1.p	HEAT repeat family protein, putative, expressed
Npp.10D019330.1	Sspon.04G0015490-2P	Sobic.010G185300.1.p	AP2 domain containing protein, expressed
Npp.10A012000.1	Sspon.08G0013410-2D	-
Npp.10A012010.1	Sspon.08G0009150-4D	Sobic.010G129600.1.p	dual specificity protein phosphatase, putative, expressed
Npp.03C025730.1	Sspon.03G0007870-2B	Sobic.003G274400.1.p	WD domain, G-beta repeat domain containing protein, expressed
Npp.03B003540.1	Sspon.01G0003400-2B	Sobic.003G041600.1.p	DUF623 domain containing protein, expressed
Npp.06D025520.1	Sspon.03G0047280-1D	Sobic.006G278500.2.p	class I glutamine amidotransferase, putative, expressed
Npp.09D005790.1	Sspon.07G0012570-1A	Sobic.009G050400.1.p	ethylene receptor, putative, expressed
Npp.09D005780.1	Sspon.07G0012580-1T	Sobic.009G050300.1.p	60S ribosomal protein L18-3, putative, expressed
Npp.04A022760.1	Sspon.04G0008470-3C	Sobic.004G211900.1.p	CPuORF9 - conserved peptide uORF-containing transcript, expressed
Npp.04A022770.1	Sspon.04G0008460-2B	Sobic.004G212000.1.p	SET domain containing protein, expressed
Npp.04A022780.1	Sspon.04G0024730-2C	Sobic.004G212100.1.p	PPR repeat domain containing protein, putative, expressed
Npp.04A022790.1	Sspon.04G0032310-2D	Sobic.004G212200.1.p	enhancer of rudimentary protein, putative, expressed
Npp.04A022800.1	Sspon.05G0007780-3D	Sobic.006G136400.1.p	eukaryotic initiation factor iso-4F subunit p82-34, putative, expressed
Npp.04A022810.1	-	Sobic.004G212250.1.p	Sobic.004G212250.1.p
Npp.04C016070.1	Sspon.07G0008140-1A	Sobic.002G170600.2.p	expressed protein
Npp.04A022830.1	Sspon.04G0024720-3D	Sobic.004G212400.2.p	co-chaperone GrpE protein, putative, expressed
Npp.01B035510.1	Sspon.01G0011560-1A	Sobic.001G348600.1.p	patatin, putative, expressed
Npp.02B003800.1	Sspon.01G0029220-1P	Sobic.002G029000.1.p	protein kinase, putative, expressed
Npp.02B003790.1	Sspon.03G0041960-2D	Sobic.008G069901.1.p	PTHR31973,PTHR31973:SF27
Npp.02B003780.1	Sspon.04G0030190-2D	Sobic.002G220800.1.p	expressed protein
Npp.02B029810.1	Sspon.02G0006510-2C	Sobic.002G323300.1.p	ankyrin repeat family protein, putative, expressed
Npp.04C016120.1	Sspon.04G0010460-3D	Sobic.004G173100.1.p	exosome complex exonuclease, putative, expressed
Npp.05A001490.1	Sspon.05G0021150-1A	Sobic.005G012800.2.p	expressed protein
Npp.05A001500.1	Sspon.05G0021150-2B	Sobic.005G012700.3.p	expressed protein
Npp.04D013410.1	Sspon.02G0048100-2D	Sobic.004G173300.1.p	transposon protein, putative, unclassified, expressed
Npp.04D013420.1	Sspon.08G0027060-1C	Sobic.004G173400.1.p	expressed protein
Npp.04D013390.1	Sspon.04G0010460-3D	Sobic.004G173100.1.p	exosome complex exonuclease, putative, expressed
Npp.04D013400.1	Sspon.04G0010470-2B	Sobic.003G370400.1.p	ammonium transporter protein, putative, expressed
Npp.04D013450.1	Sspon.04G0010490-1A	Sobic.004G173600.2.p	OsPDIL5-3 protein disulfide isomerase PDIL5-3, expressed
Npp.04D013460.1	Sspon.05G0011190-3C	Sobic.004G174000.2.p	expressed protein
Npp.04D013430.1	Sspon.05G0011250-3C	Sobic.004G173500.1.p	CAMK_CAMK_like.13 - CAMK includes calcium/calmodulin depedent protein kinases, expressed
Npp.04D013440.1	Sspon.04G0032700-1C	Sobic.002G320500.1.p	MYB family transcription factor, putative, expressed
Npp.03C032470.1	Sspon.03G0029740-3D	Sobic.003G345100.2.p	flavonol synthase/flavanone 3-hydroxylase, putative, expressed
Npp.08D004170.1	Sspon.01G0034840-3D	Sobic.001G508000.1.p	cell division control protein 48 homolog E, putative, expressed
Npp.08D004160.1	Sspon.01G0034840-3D	Sobic.001G508000.1.p	cell division control protein 48 homolog E, putative, expressed
Npp.08D004150.1	Sspon.07G0018390-1A	Sobic.008G035600.1.p	UDP-glucoronosyl and UDP-glucosyl transferase domain containing protein, expressed
Npp.04D013370.1	Sspon.03G0000300-3C	-
Npp.04D013380.1	Sspon.01G0044320-1B	-
Npp.05C017750.1	Sspon.08G0021590-1B	-	OsFBL31 - F-box domain and LRR containing protein, expressed
Npp.05C017760.1	Sspon.06G0015840-2B	Sobic.005G163100.1.p	dnaJ domain containing protein, expressed
Npp.09B024410.1	Sspon.07G0001620-1P	Sobic.009G236100.1.p	3-ketoacyl-CoA synthase, putative, expressed
Npp.04B011510.1	Sspon.04G0012520-2B	Sobic.004G141200.1.p	cytochrome P450, putative, expressed
Npp.02D037190.1	Sspon.01G0009220-3C	Sobic.002G416600.2.p	peroxidase precursor, putative, expressed
Npp.02D037180.1	Sspon.01G0009220-1P	Sobic.002G416700.1.p	peroxidase precursor, putative, expressed
Npp.02D037170.1	Sspon.02G0001050-1A	Sobic.002G416800.1.p	peroxidase precursor, putative, expressed
Npp.09D014120.1	Sspon.05G0016710-4D	Sobic.008G069100.1.p	transposon protein, putative, CACTA, En/Spm sub-class, expressed
Npp.09D014130.1	Sspon.07G0010520-1A	Sobic.009G128500.1.p	CBS domain containing protein, expressed
Npp.09D014140.1	Sspon.07G0024060-2C	Sobic.009G128800.1.p	expressed protein
Npp.09D014150.1	Sspon.01G0062120-1D	-
Npp.04B011430.1	Sspon.04G0012600-1A	Sobic.004G139900.1.p	ATP binding, related, putative, expressed
Npp.04B011420.1	Sspon.06G0036220-1D	Sobic.004G234766.1.p	transposon protein, putative, unclassified, expressed
Npp.04B011450.1	Sspon.04G0026120-1B	Sobic.004G140300.1.p	delta14-sterol reductase, putative, expressed
Npp.04B011440.1	Sspon.04G0012630-2B	Sobic.004G140000.1.p	basic helix-loop-helix family protein, putative, expressed
Npp.04B011470.1	-	-
Npp.04B011460.1	Sspon.04G0012610-2B	Sobic.004G140600.1.p	exonuclease, putative, expressed
Npp.04B011490.1	Sspon.04G0006580-1A	-
Npp.04B011480.1	Sspon.04G0012620-1A	Sobic.004G141000.1.p	cation transport regulator-like protein 1, putative, expressed
Npp.01D024660.1	Sspon.02G0058960-1D	-	expressed protein
Npp.01D024650.1	Sspon.01G0056960-1C	Sobic.001G203450.1.p	PF03372
Npp.01D024680.1	Sspon.01G0040360-1P	Sobic.001G366100.2.p	flavonol synthase/flavanone 3-hydroxylase, putative, expressed
Npp.01D024670.1	Sspon.01G0010190-4D	Sobic.001G366300.1.p	telomerase reverse transcriptase, putative, expressed
Npp.01D024620.1	Sspon.01G0052990-1P	Sobic.001G366700.1.p	villin protein, putative, expressed
Npp.01D024610.1	Sspon.01G0010140-1A	Sobic.001G366800.1.p	alpha-N-acetylglucosaminidase, putative, expressed
Npp.01D024640.1	Sspon.02G0022510-3C	Sobic.001G366500.1.p	cytochrome P450, putative, expressed
Npp.01D024630.1	Sspon.01G0010180-1A	Sobic.001G366600.1.p	OsFBX51 - F-box domain containing protein, expressed
Npp.01D024700.1	Sspon.01G0053000-1C	Sobic.001G365900.1.p	PWWP domain containing protein, expressed
Npp.01D024690.1	Sspon.01G0040360-2C	Sobic.001G366100.2.p	flavonol synthase/flavanone 3-hydroxylase, putative, expressed
Npp.10B026300.1	Sspon.08G0017690-1B	-
Npp.10B026290.1	Sspon.08G0001860-2D	Sobic.010G257000.1.p	two-component response regulator, putative, expressed
Npp.10B026280.1	Sspon.08G0001870-1A	Sobic.010G256700.4.p	MATE efflux family protein, putative, expressed
Npp.10B026270.1	Sspon.04G0018890-1P	Sobic.010G256600.2.p	glycosyltransferase, putative, expressed
Npp.10B026340.1	Sspon.08G0001850-4D	Sobic.010G257600.1.p	Rer1 protein, putative, expressed
Npp.10B026330.1	Sspon.08G0017670-1B	Sobic.010G257400.1.p	expressed protein
Npp.10B026320.1	Sspon.08G0001830-2B	Sobic.010G257300.4.p	serine esterase, putative, expressed
Npp.10B026310.1	Sspon.04G0018870-1P	Sobic.010G257100.1.p	CGMC_MAPKCMGC_2.11 - CGMC includes CDA, MAPK, GSK3, and CLKC kinases, expressed
Npp.10B026360.1	Sspon.08G0017570-2C	Sobic.010G257800.1.p	peptidyl-prolyl cis-trans isomerase, putative, expressed
Npp.10B026350.1	Sspon.08G0017570-3D	Sobic.010G257700.1.p	peptidyl-prolyl cis-trans isomerase, putative, expressed
Npp.08D010720.1	Sspon.06G0017980-1P	-	retrotransposon protein, putative, unclassified, expressed
Npp.10A024170.1	Sspon.08G0005800-1A	Sobic.010G269950.1.p	leucine zipper protein-like, putative, expressed
Npp.09C002630.1	-	Sobic.009G019700.1.p	Sobic.009G019700.1.p
Npp.09C002640.1	-	-
Npp.10A024180.1	Sspon.08G0001200-2B	Sobic.010G269400.2.p	DNL zinc finger domain containing protein, putative, expressed
Npp.06A022280.1	Sspon.05G0000870-2B	Sobic.006G266900.1.p	polygalacturonase inhibitor 3 precursor, putative, expressed
Npp.06A022270.1	Sspon.03G0020240-2C	Sobic.006G266800.1.p	aspartic proteinase nepenthesin precursor, putative, expressed
Npp.06A022300.1	Sspon.05G0000810-3D	Sobic.006G267100.1.p	expressed protein
Npp.06A022290.1	Sspon.05G0000860-3D	Sobic.006G267000.1.p	harpin-induced protein 1 domain containing protein, expressed
Npp.09C002610.1	Sspon.02G0006360-1A	Sobic.001G177700.1.p	zinc knuckle domain containing protein, expressed
Npp.06A008330.1	Sspon.05G0010820-2D	Sobic.006G090000.1.p	DUF1771 domain containing protein, putative, expressed
Npp.06A022260.1	Sspon.01G0019990-1A	Sobic.006G266700.1.p	methyltransferase, putative, expressed
Npp.09C002600.1	Sspon.04G0027820-2C	Sobic.004G085500.1.p	OsFBK3 - F-box domain and kelch repeat containing protein, expressed
Npp.08D003520.1	Sspon.07G0018080-2B	Sobic.008G029800.1.p	expressed protein
Npp.06A008320.1	Sspon.05G0010830-1A	Sobic.006G089900.1.p	pentatricopeptide, putative, expressed
Npp.06C006360.1	Sspon.03G0038120-1C	-	expressed protein
Npp.10A024130.1	Sspon.08G0001160-1A	Sobic.010G269100.2.p	zinc finger family protein, putative, expressed
Npp.03B003550.1	Sspon.03G0044070-1C	-
Npp.10A024140.1	Sspon.08G0001170-1A	Sobic.010G269200.1.p	expressed protein
Npp.10A024150.1	Sspon.08G0001180-1A	Sobic.010G269300.1.p	hydrolase, acting on carbon-nitrogen, putative, expressed
Npp.08C007150.1	Sspon.07G0029830-3D	Sobic.008G073500.2.p	AAA-type ATPase family protein, putative, expressed
Npp.10A024160.1	Sspon.08G0001190-1A	Sobic.001G500500.1.p	CTR1-like protein kinase, putative, expressed
Npp.06C022660.1	Sspon.05G0002900-1A	Sobic.006G219801.1.p	NBS-LRR disease resistance protein, putative, expressed
Npp.09D024450.1	Sspon.07G0001050-2C	Sobic.009G249100.1.p	CPuORF17 - conserved peptide uORF-containing transcript, expressed
Npp.09D024440.1	Sspon.07G0001090-1A	Sobic.009G249000.1.p	CAMK_CAMK_like.5 - CAMK includes calcium/calmodulin depedent protein kinases, expressed
Npp.09D024430.1	Sspon.07G0001100-2B	Sobic.009G248900.1.p	expressed protein
Npp.09D024420.1	Sspon.07G0001110-2B	Sobic.009G248700.1.p	C4-dicarboxylate transporter/malic acid transport protein, expressed
Npp.09D024410.1	Sspon.07G0021190-2D	Sobic.005G108600.3.p	mov34/MPN/PAD-1 family protein, expressed
Npp.09D024400.1	Sspon.02G0033000-1B	-
Npp.03D034070.1	Sspon.03G0002350-1A	Sobic.003G361200.1.p	CDC6 - Putative DNA replication initiation protein, expressed
Npp.03D034080.1	Sspon.03G0002340-3C	Sobic.003G361300.1.p	transmembrane amino acid transporter protein, putative, expressed
Npp.03D034090.1	Sspon.03G0002330-3D	Sobic.003G361400.1.p	nsp1-like C-terminal region family protein, expressed
Npp.03D034100.1	Sspon.03G0029340-1B	Sobic.009G156300.1.p	pleckstrin homology domain-containing protein, putative, expressed
Npp.05C003650.1	Sspon.05G0019970-2D	Sobic.005G029600.1.p	GRAS family transcription factor containing protein, expressed
Npp.05C003640.1	Sspon.05G0020200-1P	Sobic.005G024600.1.p	Rf1, mitochondrial precursor, putative, expressed
Npp.05C003670.1	Sspon.07G0030940-1C	Sobic.003G102000.1.p	expressed protein
Npp.05C003660.1	Sspon.05G0019960-1A	Sobic.001G229850.1.p	retrotransposon protein, putative, unclassified, expressed
Npp.05C003690.1	Sspon.05G0019940-1A	Sobic.005G029700.1.p	BTBA6 - Bric-a-Brac,Tramtrack, Broad Complex BTB domain with Ankyrin repeat region, expressed
Npp.05C003680.1	Sspon.01G0046380-2D	Sobic.006G186900.1.p	expressed protein
Npp.05C003710.1	Sspon.02G0019600-1A	Sobic.010G026100.1.p	retrotransposon protein, putative, unclassified, expressed
Npp.05C003700.1	Sspon.02G0019600-1A	-	Zm00008a038957_P01
Npp.05C003630.1	Sspon.05G0019960-1A	Sobic.004G085800.2.p	ICE-like protease p20 domain containing protein, putative, expressed
Npp.05C003620.1	Sspon.05G0035900-1C	Sobic.005G029600.1.p	GRAS family transcription factor containing protein, expressed
Npp.09D022510.1	Sspon.07G0002760-2B	Sobic.009G222400.1.p	expressed protein
Npp.04D000230.1	Sspon.04G0030090-2D	Sobic.004G005900.1.p	expressed protein
Npp.02A005940.1	Sspon.02G0023290-3D	Sobic.002G058100.1.p	thioredoxin, putative, expressed
Npp.01D023580.1	Sspon.01G0010680-1A	Sobic.001G358200.1.p	calmodulin-binding protein, putative, expressed
Npp.01D023570.1	Sspon.01G0010710-1A	Sobic.001G357800.1.p	amino acid permease family protein, putative, expressed
Npp.01D023600.1	Sspon.01G0053070-2D	Sobic.001G358500.1.p	GA20734-PA, putative, expressed
Npp.01D023590.1	Sspon.01G0010670-2C	Sobic.001G358300.2.p	SNARE associated Golgi protein, putative, expressed
Npp.01D023620.1	Sspon.01G0010660-1A	Sobic.001G358800.1.p	protein phosphatase 2C, putative, expressed
Npp.01D023610.1	Sspon.01G0039770-2C	Sobic.001G358600.3.p	LTV1, putative, expressed
Npp.01D023640.1	Sspon.01G0010540-3C	Sobic.001G359200.1.p	cytochrome P450 72A1, putative, expressed
Npp.01D023630.1	Sspon.01G0010650-3D	Sobic.001G358900.1.p	myb-like DNA-binding domain containing protein, putative, expressed
Npp.01D023660.1	Sspon.01G0010640-1A	Sobic.001G359300.1.p	cytochrome P450, putative, expressed
Npp.01D023650.1	Sspon.01G0010530-4D	Sobic.001G359200.1.p	cytochrome P450 72A1, putative, expressed
Npp.04C014140.1	Sspon.04G0011970-1A	Sobic.004G151500.3.p	AP2 domain containing protein, expressed
Npp.04C014130.1	Sspon.04G0011980-2B	Sobic.004G151400.1.p	glycosyl transferase 8 domain containing protein, putative, expressed
Npp.04C014120.1	Sspon.04G0011990-1P	Sobic.004G151300.4.p	DUF803 domain containing, putative, expressed
Npp.04C014110.1	Sspon.04G0025950-1T	Sobic.004G151200.1.p	RNA-binding protein-like, putative, expressed
Npp.04C014100.1	Sspon.04G0025960-2C	Sobic.004G151000.1.p	RecF/RecN/SMC N terminal domain containing protein, expressed
Npp.04C014090.1	-	Sobic.004G150800.1.p	Sobic.004G150800.1.p
Npp.04C014080.1	Sspon.04G0012050-1A	Sobic.006G224100.1.p	expressed protein
Npp.04C014070.1	Sspon.04G0032940-1C	Sobic.004G150400.1.p	HSF-type DNA-binding domain containing protein, expressed
Npp.04C014060.1	-	-	Zm00008a018342_P01
Npp.04C014050.1	Sspon.04G0026000-1P	Sobic.004G149800.1.p	hhH-GPD superfamily base excision DNA repair protein, expressed
Npp.03B002800.1	Sspon.03G0022950-3C	Sobic.003G033100.1.p	RNA methyltransferase protein, putative, expressed
Npp.03B002790.1	Sspon.03G0022960-3D	Sobic.003G033000.1.p	DIRP family protein, putative, expressed
Npp.06B022780.1	Sspon.05G0036880-1P	Sobic.006G245800.1.p	PPR repeat domain containing protein, putative, expressed
Npp.01A031540.1	Sspon.01G0001430-3C	Sobic.001G315200.1.p	expressed protein
Npp.01A031550.1	Sspon.01G0013470-2B	Sobic.001G315400.1.p	expressed protein
Npp.01A031560.1	Sspon.01G0040940-3D	Sobic.001G315500.1.p	ethylene-responsive element-binding protein, putative, expressed
Npp.01A031570.1	Sspon.01G0040950-3D	Sobic.001G315600.1.p	lectin-like receptor kinase, putative, expressed
Npp.01A031580.1	Sspon.01G0013460-3C	Sobic.001G315700.1.p	CGMC_MAPKCMGC_2_ERK.14 - CGMC includes CDA, MAPK, GSK3, and CLKC kinases, expressed
Npp.03B002830.1	Sspon.02G0010940-4D	Sobic.002G256500.1.p	expressed protein
Npp.03B002820.1	Sspon.03G0008930-1A	Sobic.003G033400.1.p	3-5 exonuclease domain-containing protein, putative, expressed
Npp.03B002810.1	Sspon.03G0022940-3C	Sobic.003G033200.1.p	F-box/LRR-repeat protein, putative, expressed
Npp.01B036510.1	Sspon.01G0014070-1A	Sobic.001G112200.1.p	LTPL118 - Protease inhibitor/seed storage/LTP family protein precursor, expressed
Npp.01B036500.1	Sspon.01G0056920-2D	Sobic.001G112100.1.p	retrotransposon protein, putative, Ty1-copia subclass, expressed
Npp.01B036530.1	Sspon.01G0027420-2B	Sobic.001G110600.1.p	HEAT repeat family protein, putative, expressed
Npp.01B036520.1	Sspon.02G0004610-1A	Sobic.008G056800.1.p	expressed protein
Npp.01C008860.1	Sspon.02G0052320-1C	Sobic.005G193900.1.p	DNA binding protein, putative, expressed
Npp.01C008850.1	Sspon.01G0013180-1A	Sobic.004G025900.1.p	glycosyl hydrolases family 16, putative, expressed
Npp.01C008880.1	Sspon.01G0027430-3C	Sobic.001G110500.1.p	expressed protein
Npp.01C008870.1	Sspon.01G0027440-3C	Sobic.001G110300.1.p	fb27, putative, expressed
Npp.06C007350.1	Sspon.05G0012400-1A	Sobic.006G058300.1.p	expressed protein
Npp.06C007340.1	Sspon.05G0012370-1T	Sobic.006G058100.1.p	ATP-dependent Clp protease ATP-binding subunit clpA homolog CD4B,chloroplast precursor, putative, expressed
Npp.01C008840.1	Sspon.01G0046580-1B	Sobic.001G110100.1.p	expressed protein
Npp.01C008830.1	Sspon.01G0027450-3C	Sobic.001G110000.1.p	Core histone H2A/H2B/H3/H4 domain containing protein, putative, expressed
Npp.06C007310.1	Sspon.05G0012430-4D	Sobic.006G058000.1.p	OsSCP24 - Putative Serine Carboxypeptidase homologue, expressed
Npp.10C021370.1	Sspon.01G0000070-1A	Sobic.001G544600.2.p	phosphoribosyl transferase, putative, expressed
Npp.10C021360.1	Sspon.01G0000080-1P	Sobic.001G544500.1.p	expressed protein
Npp.10C021350.1	Sspon.05G0005940-2C	Sobic.001G544400.1.p	oleosin, putative, expressed
Npp.08B011000.1	Sspon.07G0002700-2C	Sobic.008G108700.1.p	OsFBX3 - F-box domain containing protein, expressed
Npp.09A019340.1	Sspon.07G0000790-2C	Sobic.009G191500.1.p	pseudouridylate synthase, putative, expressed
Npp.09A019350.1	Sspon.07G0000810-2B	Sobic.009G191600.1.p	tesmin/TSO1-like CXC domain containing protein, expressed
Npp.09A019320.1	Sspon.07G0000830-2B	Sobic.009G191400.1.p	NADH dehydrogenase flavoprotein 2, mitochondrial precursor, putative, expressed
Npp.09A019330.1	Sspon.07G0000820-1A	Sobic.009G191500.1.p	pseudouridylate synthase, putative, expressed
Npp.09A019380.1	Sspon.07G0022830-1B	Sobic.009G191900.1.p	expressed protein
Npp.09A019390.1	Sspon.07G0000870-3C	Sobic.009G191800.4.p	single-stranded DNA-binding protein, putative, expressed
Npp.09A019360.1	Sspon.02G0047520-1C	Sobic.002G098300.1.p	expressed protein
Npp.09A019370.1	Sspon.07G0000860-2C	Sobic.009G191700.1.p	signal recognition particle 54 kDa protein, putative, expressed
Npp.09A019300.1	Sspon.07G0000850-3D	Sobic.009G191200.1.p	40S ribosomal protein S15, putative, expressed
Npp.09A019310.1	Sspon.07G0000840-1A	Sobic.009G191300.1.p	photosystem II reaction center W protein, chloroplast precursor, putative, expressed
Npp.04A027500.1	Sspon.04G0023310-2C	Sobic.004G269900.2.p	growth-regulating factor, putative, expressed
Npp.04A027510.1	Sspon.01G0048960-1B	Sobic.001G057200.1.p	pyruvate kinase, putative, expressed
Npp.08D011120.1	Sspon.07G0021380-2C	Sobic.001G370750.1.p	expressed protein
Npp.04A027540.1	Sspon.04G0005530-3C	Sobic.004G269600.1.p	PPR repeat domain containing protein, putative, expressed
Npp.04A027550.1	Sspon.04G0005520-1A	Sobic.004G269500.1.p	transcription factor TF2, putative, expressed
Npp.04A027520.1	Sspon.04G0005540-1P	Sobic.004G269800.1.p	Cyclopropane-fatty-acyl-phospholipid synthase, putative, expressed
Npp.04A027530.1	Sspon.04G0005540-3D	Sobic.004G269700.1.p	oxidoreductase, short chain dehydrogenase/reductase family, putative, expressed
Npp.04A027580.1	Sspon.04G0005490-2B	Sobic.004G269100.4.p	ATROPGEF7/ROPGEF7, putative, expressed
Npp.04A027590.1	Sspon.04G0005480-1A	-
Npp.04A027560.1	Sspon.04G0005510-1A	Sobic.004G269400.1.p	pectinacetylesterase domain containing protein, expressed
Npp.04A027570.1	Sspon.04G0005500-3D	Sobic.004G269200.1.p	protein kinase, putative, expressed
Npp.09B002520.1	Sspon.06G0032290-1C	Sobic.005G141000.1.p	plant protein of unknown function domain containing protein, expressed
Npp.06C006380.1	Sspon.05G0012940-1P	Sobic.004G068700.1.p	cytochrome P450, putative, expressed
Npp.08D014760.1	Sspon.02G0030200-2D	Sobic.008G149650.1.p	MYB family transcription factor, putative, expressed
Npp.07B014160.1	Sspon.01G0036470-1B	-	expressed protein
Npp.08C007130.1	Sspon.01G0058180-1D	Sobic.001G392400.1.p	expressed protein
Npp.10B018200.1	Sspon.08G0005990-3D	Sobic.010G189500.3.p	MONOCULM 1, putative, expressed
Npp.10B018210.1	Sspon.08G0005970-2B	Sobic.010G189600.1.p	MLO domain containing protein, putative, expressed
Npp.10B018180.1	Sspon.08G0006010-3C	Sobic.010G189300.1.p	chlorophyll A-B binding protein, putative, expressed
Npp.10B018190.1	Sspon.06G0021320-1P	Sobic.010G189366.1.p	bifunctional monodehydroascorbate reductase and carbonic anhydrasenectarin-3 precursor, putative, expressed
Npp.10B018240.1	Sspon.08G0005950-4D	Sobic.010G189800.1.p	microtubule associated protein, putative, expressed
Npp.10B018250.1	Sspon.08G0005940-2B	Sobic.010G189900.1.p	IQ calmodulin-binding motif family protein, putative, expressed
Npp.10B018220.1	Sspon.08G0005970-2B	Sobic.010G189600.1.p	MLO domain containing protein, putative, expressed
Npp.10B018230.1	Sspon.08G0005960-1A	Sobic.010G189700.1.p	aspartic proteinase, putative, expressed
Npp.10D011590.1	Sspon.08G0029530-1D	Sobic.010G105000.1.p	caleosin related protein, putative, expressed
Npp.10D011580.1	Sspon.08G0029530-1D	Sobic.010G104900.3.p	caleosin related protein, putative, expressed
Npp.10B018260.1	Sspon.08G0005930-4D	Sobic.010G190001.1.p	polygalacturonase, putative, expressed
Npp.10B018270.1	Sspon.08G0005930-4D	Sobic.010G190001.1.p	polygalacturonase, putative, expressed
Npp.03C026850.1	Sspon.03G0007130-2B	Sobic.003G286400.1.p	DUF623 domain containing protein, expressed
Npp.03C026840.1	Sspon.03G0007130-1A	Sobic.003G286300.2.p	GTPase of unknown function domain containing protein, putative, expressed
Npp.03C026830.1	Sspon.03G0005960-1A	Sobic.003G286100.1.p	mitochondrial import receptor subunit TOM7-1, putative, expressed
Npp.03C026820.1	Sspon.03G0007140-3C	Sobic.003G286000.2.p	zinc finger, C3HC4 type domain containing protein, expressed
Npp.08D002550.1	Sspon.05G0020680-3P	Sobic.008G021900.1.p	nucleoside-triphosphatase, putative, expressed
Npp.09B002510.1	Sspon.07G0027220-1B	Sobic.009G015100.2.p	ACT domain containing protein, expressed
Npp.04D012170.1	Sspon.02G0026150-1A	Sobic.002G005100.1.p	dirigent, putative, expressed
Npp.04D012180.1	Sspon.04G0011760-2C	Sobic.004G154800.2.p	expressed protein
Npp.ctg059359	Sspon.05G0002830-1P	Sobic.006G219300.2.p	ABC transporter family protein, putative, expressed
Npp.ctg059358	Sspon.04G0010010-1P	Sobic.006G100600.1.p	histone H3, putative, expressed
Npp.06C006370.1	Sspon.05G0012940-1P	Sobic.004G068700.1.p	cytochrome P450, putative, expressed
Npp.02D038670.1	Sspon.02G0034780-1B	Sobic.002G349500.1.p	inactive receptor kinase At2g26730 precursor, putative, expressed
Npp.02D038680.1	Sspon.02G0012540-2B	Sobic.002G349100.1.p	pyridoxamine 5\'-phosphate oxidase family protein, putative, expressed
Npp.02D038650.1	Sspon.04G0000630-1A	Sobic.008G140050.1.p	OsFBX286 - F-box domain containing protein, expressed
Npp.02D038660.1	Sspon.02G0034770-2C	Sobic.002G349800.1.p	ubiquitin-like protein SMT3, putative, expressed
Npp.02D038710.1	Sspon.02G0034800-1B	Sobic.002G348700.1.p	carboxyl-terminal peptidase, putative, expressed
Npp.04D012220.1	Sspon.05G0012900-2B	Sobic.004G155300.1.p	expressed protein
Npp.02D038690.1	Sspon.02G0012530-1A	Sobic.002G349000.1.p	UAA transporter family domain containing protein, expressed
Npp.02D038700.1	Sspon.02G0012520-4D	Sobic.002G348900.1.p	cytochrome P450, putative, expressed
Npp.09D017600.1	Sspon.07G0006220-1P	Sobic.009G165100.1.p	glycine-rich cell wall structural protein 2 precursor, putative, expressed
Npp.09D017540.1	Sspon.07G0006250-1A	Sobic.009G164400.1.p	expressed protein
Npp.04B016860.1	Sspon.04G0000070-3C	Sobic.004G199700.1.p	expressed protein
Npp.04B016870.1	Sspon.04G0009300-1A	-
Npp.09B018360.1	Sspon.03G0007150-3D	Sobic.009G207400.1.p	ATP binding protein, putative, expressed
Npp.04B016940.1	Sspon.04G0009170-2D	Sobic.004G200400.1.p	protein kinase domain containing protein, expressed
Npp.04B016950.1	Sspon.04G0011360-1P	Sobic.004G200700.1.p	AP2 domain containing protein, expressed
Npp.04B016920.1	Sspon.01G0040520-3D	Sobic.001G336200.1.p	cytochrome P450, putative, expressed
Npp.04B016930.1	Sspon.04G0015520-2B	Sobic.004G084400.1.p	methyltransferase domain containing protein, expressed
Npp.04B016900.1	Sspon.04G0017690-1A	Sobic.004G200100.1.p	leucine-rich repeat family protein, putative, expressed
Npp.04B016910.1	Sspon.04G0017700-3D	Sobic.004G200200.1.p	joka2, putative, expressed
Npp.04B016880.1	Sspon.04G0009300-2D	Sobic.004G199900.1.p	inorganic phosphate transporter 2-1, chloroplast precursor, putative, expressed
Npp.04B016890.1	Sspon.04G0036290-1D	Sobic.004G200000.2.p	expressed protein
Npp.03A004860.1	Sspon.03G0022200-2B	Sobic.003G042400.1.p	DSHCT domain containing protein, expressed
Npp.03A004870.1	Sspon.03G0022190-2B	Sobic.003G042700.4.p	TMS membrane protein/tumour differentially expressed protein, putative, expressed
Npp.03A004800.1	Sspon.03G0022230-3C	Sobic.003G041900.2.p	DUF581 domain containing protein, expressed
Npp.03A004810.1	Sspon.03G0000440-1A	Sobic.003G404700.1.p	regulatory protein, putative, expressed
Npp.03A004780.1	Sspon.03G0044070-2D	-
Npp.03A004790.1	Sspon.03G0022240-1A	Sobic.003G041700.1.p	DNA mismatch repair protein MSH6-2, putative, expressed
Npp.03A004840.1	Sspon.01G0017840-1A	Sobic.006G059150.1.p	expressed protein
Npp.03A004850.1	Sspon.03G0029190-1B	-	POLA1 - Putative DNA polymerase alpha catalytic subunit, expressed
Npp.03A004820.1	Sspon.03G0022220-2B	Sobic.003G042100.3.p	MAR-binding filament-like protein 1, putative, expressed
Npp.03A004830.1	Sspon.02G0059810-1D	-	OsFBO6 - F-box and other domain containing protein, expressed
Npp.10B011100.1	Sspon.08G0009900-1P	Sobic.010G118700.1.p	microtubule-associated protein, putative, expressed
Npp.10B011090.1	Sspon.08G0009910-2C	Sobic.002G234500.1.p	beta-expansin precursor, putative, expressed
Npp.10B011160.1	Sspon.04G0033720-1C	Sobic.001G347001.1.p	expressed protein
Npp.10B011150.1	Sspon.08G0009750-2B	Sobic.010G121800.1.p	expansin precursor, putative, expressed
Npp.10B011180.1	Sspon.08G0027130-1C	Sobic.010G121700.1.p	plastocyanin-like domain containing protein, putative, expressed
Npp.10B011170.1	Sspon.02G0021240-1A	Sobic.003G099100.1.p	transposon protein, putative, unclassified, expressed
Npp.10B011120.1	Sspon.08G0009880-2B	Sobic.010G119300.1.p	expressed protein
Npp.10B011110.1	Sspon.08G0009890-2B	Sobic.010G119200.1.p	histone-like transcription factor and archaeal histone, putative, expressed
Npp.10B011140.1	Sspon.08G0027140-2D	Sobic.010G120000.1.p	embryogenesis transmembrane protein, putative, expressed
Npp.10B011130.1	Sspon.08G0009870-1A	Sobic.010G119600.1.p	embryogenesis transmembrane protein, putative, expressed
Npp.01A029570.1	Sspon.08G0001650-1A	-
Npp.06A018850.1	Sspon.05G0003480-1A	Sobic.006G227200.1.p	leucoanthocyanidin reductase, putative, expressed
Npp.06A018860.1	Sspon.05G0003480-1A	Sobic.006G227100.1.p	leucoanthocyanidin reductase, putative, expressed
Npp.06A018870.1	Sspon.05G0003500-2C	Sobic.006G227900.2.p	organic cation transporter protein, putative, expressed
Npp.06A018880.1	Sspon.05G0003530-2C	Sobic.001G179400.1.p	glycosyl hydrolases family 16 protein, protein, expressed
Npp.06A018890.1	Sspon.05G0003540-1A	Sobic.006G228200.1.p	receptor-like kinase, putative, expressed
Npp.06A018900.1	Sspon.05G0003540-3C	Sobic.006G228200.1.p	receptor-like kinase, putative, expressed
Npp.06A018910.1	Sspon.05G0003550-3D	Sobic.006G228300.1.p	ethylene-responsive protein related, putative, expressed
Npp.06A018920.1	Sspon.05G0003570-3D	Sobic.006G229600.1.p	serine/threonine-protein kinase receptor precursor, putative, expressed
Npp.06A018930.1	Sspon.05G0003640-2D	Sobic.006G229600.1.p	serine/threonine-protein kinase receptor precursor, putative, expressed
Npp.01B008600.1	Sspon.03G0022500-1A	Sobic.001G331401.1.p	expressed protein
Npp.01B008590.1	Sspon.01G0028930-2B	Sobic.001G075300.1.p	MYB family transcription factor, putative, expressed
Npp.01B008570.1	Sspon.01G0028940-1A	Sobic.001G075101.1.p	Homeobox domain containing protein, expressed
Npp.06B020210.1	Sspon.05G0002930-1A	Sobic.006G219801.1.p	NBS-LRR disease resistance protein, putative, expressed
Npp.06B020220.1	Sspon.02G0029410-1P	Sobic.008G140900.1.p	hypothetical protein
Npp.06B020230.1	Sspon.02G0029410-1P	Sobic.006G219950.1.p	hypothetical protein
Npp.06B020240.1	Sspon.05G0002940-3C	Sobic.006G220000.3.p	bromodomain containing protein, expressed
Npp.06C006400.1	Sspon.05G0012940-2P	Sobic.004G068700.1.p	cytochrome P450, putative, expressed
Npp.08A012740.1	Sspon.02G0028810-3D	Sobic.008G132600.1.p	expressed protein
Npp.06C020500.1	Sspon.02G0013340-1A	Sobic.008G148300.1.p	kinesin motor domain containing protein, putative, expressed
Npp.09B014280.1	Sspon.07G0007010-2B	Sobic.009G153700.1.p	histone deacetylase, putative, expressed
Npp.09B005560.1	Sspon.07G0013140-2D	Sobic.009G043600.1.p	glutathione S-transferase, putative, expressed
Npp.01A029580.1	Sspon.08G0001660-1A	-
Npp.08A012730.1	Sspon.02G0044600-1B	Sobic.008G132500.2.p	pleiotropic drug resistance protein, putative, expressed
Npp.09B005540.1	Sspon.07G0013120-2C	Sobic.009G043600.1.p	glutathione S-transferase, putative, expressed
Npp.02A026380.1	Sspon.02G0005510-1A	Sobic.002G335700.1.p	OsFBX252 - F-box domain containing protein, expressed
Npp.02A026390.1	-	-
Npp.09B005530.1	Sspon.06G0020760-2C	-
Npp.02A026300.1	Sspon.02G0005590-4D	Sobic.002G335000.1.p	UPF0041 domain containing protein, putative, expressed
Npp.04D016830.1	Sspon.04G0008620-4D	Sobic.004G209900.1.p	non-receptor tyrosine kinase spore lysis A, putative, expressed
Npp.02A026320.1	Sspon.02G0005570-3D	Sobic.002G335300.2.p	uncharacterized Cys-rich domain containing protein, putative, expressed
Npp.02A026330.1	Sspon.02G0005530-2D	Sobic.002G335400.1.p	OsFBX250 - F-box domain containing protein, expressed
Npp.02A026340.1	Sspon.02G0005530-2D	Sobic.002G335500.1.p	OsFBX254 - F-box domain containing protein, expressed
[truncated: 120,946 more rows]
