# Supplementary material for: Genomic insights into the recent chromosome reduction and polyploidization of complex autopolyploid sugarcane S. spontaneum
Source: Research Square preprint supplement (doi:10.21203/rs.3.rs-494691/v1), 2021-05-14
Supplement: Supplementary file 5 [file d681fb10038d49b8d133a00c.xlsx]

## Sheet: Np-X_Anno
#geneID	Nr	SwissProt	Trembl	KOG	GO	Interpro	KEGG
Npp.01A000010.1	serine/arginine repetitive matrix protein 1	-	-	-	-	-	-
Npp.01A000020.1	acetylajmalan esterase	GDSL esterase/lipase At1g28570	GDSL esterase/lipase At1g28570	-	GO:0016788: hydrolase activity, acting on ester bonds	IPR001087: GDSL lipase/esterase; IPR035669: GDSL lipase/esterase-like, plant; IPR036514: SGNH hydrolase superfamily	-
Npp.01A000030.1	-	-	-	-	-	IPR043128: Reverse transcriptase/Diguanylate cyclase domain; IPR043502: DNA/RNA polymerase superfamily	-
Npp.01A000040.1	uncharacterized protein LOC8083320	-	-	-	GO:0005509: calcium ion binding	IPR002048: EF-hand domain; IPR011992: EF-hand domain pair; IPR018247: EF-Hand 1, calcium-binding site	-
Npp.01A000050.1	vesicle-associated protein 1-2 isoform X1	Vesicle-associated protein 1-2	Vesicle-associated protein 1-2	-	-	-	-
Npp.01A000060.1	uncharacterized protein LOC8063054; hypothetical protein BAE44_0011850	-	-	-	-	IPR001876: Zinc finger, RanBP2-type; IPR005135: Endonuclease/exonuclease/phosphatase; IPR036443: Zinc finger, RanBP2-type superfamily; IPR036691: Endonuclease/exonuclease/phosphatase superfamily	K19619: TDP2;tyrosyl-DNA phosphodiesterase 2 [EC:3.1.4.-]
Npp.01A000070.1	regulator of MON1-CCZ1 complex isoform X1; uncharacterized protein C18orf8	Regulator of MON1-CCZ1 complex	Regulator of MON1-CCZ1 complex	KOG2377: Uncharacterized conserved protein	GO:0010506: regulation of autophagy; GO:0035658: Mon1-Ccz1 complex	IPR009755: Regulator of MON1-CCZ1 complex, C-terminal; IPR040371: Regulator of MON1-CCZ1 complex	-
Npp.01A000080.1	uncharacterized protein LOC9270452 isoform X5; hypothetical protein SORBI_3003G319050	-	-	-	-	-	-
Npp.01A000090.1	pentatricopeptide repeat-containing protein At2g22410, mitochondrial	Pentatricopeptide repeat-containing protein At2g22410, mitochondrial	Pentatricopeptide repeat-containing protein At2g22410, mitochondrial	-	GO:0005515: protein binding	IPR002885: Pentatricopeptide repeat; IPR011990: Tetratricopeptide-like helical domain superfamily	-
Npp.01A000100.1	Nudix hydrolase 14 chloroplastic	-	-	-	-	-	-
Npp.01A000110.1	retrotransposon protein, putative, Ty1-copia subclass	-	-	-	-	IPR012337: Ribonuclease H-like superfamily	-
Npp.01A000120.1	retrotransposon protein, putative, Ty1-copia subclass; polyprotein	-	-	-	GO:0003676: nucleic acid binding; GO:0015074: DNA integration	IPR001584: Integrase, catalytic core; IPR012337: Ribonuclease H-like superfamily; IPR025724: GAG-pre-integrase domain; IPR036397: Ribonuclease H superfamily	-
Npp.01A000130.1	pentatricopeptide repeat-containing protein At2g22410, mitochondrial	Pentatricopeptide repeat-containing protein At2g22410, mitochondrial	Pentatricopeptide repeat-containing protein At2g22410, mitochondrial	-	GO:0005515: protein binding	IPR002885: Pentatricopeptide repeat; IPR011990: Tetratricopeptide-like helical domain superfamily	-
Npp.01A000140.1	probable methionine--tRNA ligase	Probable methionine--tRNA ligase	Probable methionine--tRNA ligase	KOG1247: Methionyl-tRNA synthetase	GO:0004825: methionine-tRNA ligase activity; GO:0005524: ATP binding; GO:0006431: methionyl-tRNA aminoacylation	IPR001412: Aminoacyl-tRNA synthetase, class I, conserved site; IPR009080: Aminoacyl-tRNA synthetase, class Ia, anticodon-binding; IPR014729: Rossmann-like alpha/beta/alpha sandwich fold; IPR014758: Methionyl-tRNA synthetase; IPR015413: Methionyl/Leucyl tRNA synthetase; IPR023458: Methionine-tRNA ligase, type 1; IPR029038: Methionyl-tRNA synthetase, Zn-domain; IPR033911: Methioninyl-tRNA synthetas…	K01874: MARS,metG;methionyl-tRNA synthetase [EC:6.1.1.10]
Npp.01A000150.1	retrotransposon protein, putative, Ty1-copia subclass	Retrovirus-related Pol polyprotein from transposon RE2	Retrovirus-related Pol polyprotein from transposon RE2	-	-	IPR013103: Reverse transcriptase, RNA-dependent DNA polymerase; IPR043502: DNA/RNA polymerase superfamily	-
Npp.01A000160.1	probable cystathionine gamma-synthase 2	Cystathionine gamma-synthase 1, chloroplastic	Cystathionine gamma-synthase 1, chloroplastic	KOG0053: Cystathionine beta-lyases/cystathionine gamma-synthases	GO:0003824: catalytic activity; GO:0019346: transsulfuration; GO:0030170: pyridoxal phosphate binding	IPR000277: Cys/Met metabolism, pyridoxal phosphate-dependent enzyme; IPR015421: Pyridoxal phosphate-dependent transferase, major domain; IPR015422: Pyridoxal phosphate-dependent transferase domain 1; IPR015424: Pyridoxal phosphate-dependent transferase	K01739: metB;cystathionine gamma-synthase [EC:2.5.1.48]
Npp.01A000170.1	uncharacterized protein LOC103655498	-	-	-	-	IPR024752: Myb/SANT-like domain; IPR027806: Harbinger transposase-derived nuclease domain	-
Npp.01A000180.1	adenylate kinase 4	Adenylate kinase 4	Adenylate kinase 4	KOG3078: Adenylate kinase	GO:0004017: adenylate kinase activity; GO:0005524: ATP binding; GO:0006139: nucleobase-containing compound metabolic process	IPR000850: Adenylate kinase/UMP-CMP kinase; IPR006259: Adenylate kinase subfamily; IPR007862: Adenylate kinase, active site lid domain; IPR027417: P-loop containing nucleoside triphosphate hydrolase; IPR033690: Adenylate kinase, conserved site	K00939: adk,AK;adenylate kinase [EC:2.7.4.3]
Npp.01A000190.1	uncharacterized protein LOC8054250	-	-	-	-	IPR012871: Protein of unknown function DUF1677, Oryza sativa	-
Npp.01A000200.1	putative polyol transporter 1	Polyol transporter 5	Polyol transporter 5	-	GO:0016020: membrane; GO:0016021: integral component of membrane; GO:0022857: transmembrane transporter activity; GO:0055085: transmembrane transport	IPR003663: Sugar/inositol transporter; IPR005828: Major facilitator, sugar transporter-like; IPR005829: Sugar transporter, conserved site; IPR020846: Major facilitator superfamily domain; IPR036259: MFS transporter superfamily	-
Npp.01A000210.1	dehydrodolichyl diphosphate synthase complex subunit NUS1-like isoform X2	Dehydrodolichyl diphosphate synthase complex subunit NUS1	Dehydrodolichyl diphosphate synthase complex subunit NUS1	-	GO:0016765: transferase activity, transferring alkyl or aryl (other than methyl) groups; GO:0019408: dolichol biosynthetic process; GO:1904423: dehydrodolichyl diphosphate synthase complex	IPR036424: Decaprenyl diphosphate synthase-like superfamily; IPR038887: Dehydrodolichyl diphosphate synthase complex subunit Nus1	K11778: DHDDS,RER2,SRT1;ditrans,polycis-polyprenyl diphosphate synthase [EC:2.5.1.87]
Npp.01A000220.1	plant-specific TFIIB-related protein 1	Transcription initiation factor IIB	Transcription initiation factor IIB	KOG1597: Transcription initiation factor TFIIB	GO:0006352: DNA-templated transcription, initiation; GO:0017025: TBP-class protein binding; GO:0070897: DNA-templated transcriptional preinitiation complex assembly	IPR000812: Transcription factor TFIIB; IPR013150: Transcription factor TFIIB, cyclin-like domain; IPR013763: Cyclin-like; IPR036915: Cyclin-like superfamily	K03124: TFIIB,GTF2B,SUA7,tfb;transcription initiation factor TFIIB
Npp.01A000230.1	uncharacterized protein LOC8066205; hypothetical protein SETIT_1G326900v2	-	-	-	-	-	-
Npp.01A000240.1	LMBR1 domain-containing protein 2 homolog A isoform X1; LMBR1-like membrane protein	LMBR1 domain-containing protein 2 homolog A	LMBR1 domain-containing protein 2 homolog A	-	-	IPR006876: LMBR1-like membrane protein	-
Npp.01A000250.1	serine/threonine-protein phosphatase PP1	Serine/threonine-protein phosphatase PP1	Serine/threonine-protein phosphatase PP1	-	GO:0016787: hydrolase activity	IPR004843: Calcineurin-like phosphoesterase domain, ApaH type; IPR006186: Serine/threonine-specific protein phosphatase/bis(5-nucleosyl)-tetraphosphatase; IPR029052: Metallo-dependent phosphatase-like; IPR031675: Serine-threonine protein phosphatase, N-terminal	K06269: PPP1C;serine/threonine-protein phosphatase PP1 catalytic subunit [EC:3.1.3.16]
Npp.01A000260.1	transcription factor bHLH78	Transcription factor SPATULA	Transcription factor SPATULA	-	GO:0046983: protein dimerization activity	IPR011598: Myc-type, basic helix-loop-helix (bHLH) domain; IPR036638: Helix-loop-helix DNA-binding domain superfamily	-
Npp.01A000270.1	hypothetical protein SORBI_3010G051900; uncharacterized protein LOC101756885	-	-	-	-	-	-
Npp.01A000280.1	tubulin beta-3 chain	Tubulin beta-3 chain	Tubulin beta-3 chain	-	GO:0003924: GTPase activity; GO:0005200: structural constituent of cytoskeleton; GO:0005525: GTP binding; GO:0005874: microtubule; GO:0007017: microtubule-based process	IPR000217: Tubulin; IPR002453: Beta tubulin; IPR003008: Tubulin/FtsZ, GTPase domain; IPR008280: Tubulin/FtsZ, C-terminal; IPR013838: Beta tubulin, autoregulation binding site; IPR017975: Tubulin, conserved site; IPR018316: Tubulin/FtsZ, 2-layer sandwich domain; IPR023123: Tubulin, C-terminal; IPR036525: Tubulin/FtsZ, GTPase domain superfamily; IPR037103: Tubulin/FtsZ, C-terminal domain superfamily	K07375: TUBB;tubulin beta
Npp.01A000290.1	hypothetical protein SORBI_3002G161100	-	-	-	-	IPR038765: Papain-like cysteine peptidase superfamily	-
Npp.01A000300.1	hypothetical protein; retrotransposon protein, putative, unclassified	-	-	-	-	-	-
Npp.01A000310.1	subtilisin-like protease SBT1.6	Subtilisin-like protease SBT1.6	Subtilisin-like protease SBT1.6	-	GO:0004252: serine-type endopeptidase activity; GO:0006508: proteolysis	IPR000209: Peptidase S8/S53 domain; IPR003137: PA domain; IPR010259: Peptidase S8 propeptide/proteinase inhibitor I9; IPR015500: Peptidase S8, subtilisin-related; IPR023828: Peptidase S8, subtilisin, Ser-active site; IPR034197: Cucumisin-like catalytic domain; IPR036852: Peptidase S8/S53 domain superfamily; IPR037045: Peptidase S8 propeptide/proteinase inhibitor I9 superfamily; IPR041469: Subtili…	-
Npp.01A000320.1	actin-depolymerizing factor 5 isoform X3	Actin-depolymerizing factor 5	Actin-depolymerizing factor 5	KOG1735: Actin depolymerizing factor	GO:0003779: actin binding; GO:0015629: actin cytoskeleton; GO:0030042: actin filament depolymerization	IPR002108: Actin-depolymerising factor homology domain; IPR017904: ADF/Cofilin; IPR029006: ADF-H/Gelsolin-like domain superfamily	K05765: CFL;cofilin
Npp.01A000340.1	26S proteasome non-ATPase regulatory subunit 4 homolog	26S proteasome non-ATPase regulatory subunit 4 homolog	26S proteasome non-ATPase regulatory subunit 4 homolog	KOG2884: 26S proteasome regulatory complex, subunit RPN10/PSMD4	-	IPR002035: von Willebrand factor, type A; IPR003903: Ubiquitin interacting motif; IPR036465: von Willebrand factor A-like domain superfamily	K03029: PSMD4,RPN10;26S proteasome regulatory subunit N10
Npp.01A000350.1	uncharacterized protein LOC8078859	Acyl-CoA-binding domain-containing protein 5	Acyl-CoA-binding domain-containing protein 5	-	GO:0000062: fatty-acyl-CoA binding	IPR000582: Acyl-CoA-binding protein, ACBP; IPR014352: FERM/acyl-CoA-binding protein superfamily; IPR035984: Acyl-CoA binding protein superfamily	-
Npp.01A000360.1	uncharacterized protein LOC8078858	Endo-1,4-beta-xylanase 5	Endo-1,4-beta-xylanase 5	-	GO:0004553: hydrolase activity, hydrolyzing O-glycosyl compounds; GO:0005975: carbohydrate metabolic process	IPR001000: Glycoside hydrolase family 10 domain; IPR017853: Glycoside hydrolase superfamily; IPR031158: Glycosyl hydrolases family 10, active site	-
Npp.01A000380.1	cinnamate 4-hydroxylase 2	Trans-cinnamate 4-monooxygenase	Trans-cinnamate 4-monooxygenase	-	-	-	-
Npp.01A000390.1	uncharacterized protein LOC110430433	-	-	-	-	-	-
Npp.01A000400.1	HVA22-like protein e	HVA22-like protein d	HVA22-like protein d	KOG1725: Protein involved in membrane traffic (YOP1/TB2/DP1/HVA22 family)	-	IPR004345: TB2/DP1/HVA22-related protein	K17279: REEP5_6;receptor expression-enhancing protein 5/6
Npp.01A000410.1	HVA22-like protein e	Protein HVA22; Receptor expression-enhancing protein 6	Protein HVA22; Receptor expression-enhancing protein 6	KOG1725: Protein involved in membrane traffic (YOP1/TB2/DP1/HVA22 family)	-	IPR004345: TB2/DP1/HVA22-related protein	K17279: REEP5_6;receptor expression-enhancing protein 5/6
Npp.01A000420.1	zinc finger protein 511; hypothetical protein GQ55_8G161900	Zinc finger protein 511	Zinc finger protein 511	KOG4173: Alpha-SNAP protein	-	IPR013087: Zinc finger C2H2-type; IPR039258: Zinc finger protein 511	-
Npp.01A000430.1	hypothetical protein SORBI_3005G120900; uncharacterized protein LOC103649370	-	-	-	-	-	-
Npp.01A000440.1	hypothetical protein SETIT_8G125200v2; uncharacterized protein LOC103649370	-	-	-	-	IPR007658: Protein of unknown function DUF594	-
Npp.01A000450.1	kinesin-like protein KIN-12A isoform X1	Kinesin-like protein KIN-12A	Kinesin-like protein KIN-12A	KOG0241: Kinesin-like protein	GO:0003777: microtubule motor activity; GO:0005524: ATP binding; GO:0007018: microtubule-based movement; GO:0008017: microtubule binding	IPR001752: Kinesin motor domain; IPR019821: Kinesin motor domain, conserved site; IPR027417: P-loop containing nucleoside triphosphate hydrolase; IPR027640: Kinesin-like protein; IPR036961: Kinesin motor domain superfamily	K10400: KIF15;kinesin family member 15
Npp.01A000460.1	receptor-like protein kinase HSL1 precursor	Receptor protein-tyrosine kinase CEPR2	Receptor protein-tyrosine kinase CEPR2	-	-	-	-
Npp.01A000470.1	probable calcium-transporting ATPase 9, plasma membrane-type	Probable calcium-transporting ATPase 9, plasma membrane-type	Probable calcium-transporting ATPase 9, plasma membrane-type	KOG0204: Calcium transporting ATPase	GO:0005388: calcium-transporting ATPase activity; GO:0005516: calmodulin binding; GO:0005524: ATP binding; GO:0016020: membrane; GO:0016021: integral component of membrane; GO:0070588: calcium ion transmembrane transport	IPR001757: P-type ATPase; IPR004014: Cation-transporting P-type ATPase, N-terminal; IPR006068: Cation-transporting P-type ATPase, C-terminal; IPR006408: P-type ATPase, subfamily IIB; IPR008250: P-type ATPase, A domain superfamily; IPR018303: P-type ATPase, phosphorylation site; IPR023214: HAD superfamily; IPR023298: P-type ATPase, transmembrane domain superfamily; IPR023299: P-type ATPase, cytopl…	-
Npp.01A000480.1	-	-	-	-	-	IPR001199: Cytochrome b5-like heme/steroid binding domain; IPR036400: Cytochrome b5-like heme/steroid binding domain superfamily	-
Npp.01A000490.1	NDR1/HIN1-like protein 2; hypothetical protein SORBI_3001G000100	-	-	-	-	IPR004864: Late embryogenesis abundant protein, LEA_2 subgroup	-
Npp.01A000500.1	glutathione S-transferase T2-like	-	-	-	-	IPR009057: Homeobox-like domain superfamily; IPR017877: Myb-like domain	-
Npp.01A000510.1	TBC1 domain family member 15	TBC1 domain family member 15; GTPase-activating protein GYP7	TBC1 domain family member 15; GTPase-activating protein GYP7	KOG2197: Ypt/Rab-specific GTPase-activating protein GYP7 and related proteins	-	IPR000195: Rab-GTPase-TBC domain; IPR035969: Rab-GTPase-TBC domain superfamily	-
Npp.01A000530.1	ABC transporter G family member 48 isoform X1	ABC transporter G family member 48	ABC transporter G family member 48	KOG0065: Pleiotropic drug resistance proteins (PDR1-15), ABC superfamily	GO:0005524: ATP binding; GO:0016020: membrane; GO:0016887: ATPase activity	IPR003439: ABC transporter-like; IPR003593: AAA+ ATPase domain; IPR013525: ABC-2 type transporter; IPR013581: Plant PDR ABC transporter associated; IPR027417: P-loop containing nucleoside triphosphate hydrolase; IPR034001: ATP-binding cassette transporter, PDR-like subfamily G, domain 1; IPR034003: ATP-binding cassette transporter, PDR-like subfamily G, domain 2	-
Npp.01A000540.1	-	-	-	-	-	IPR029481: ABC-transporter N-terminal domain	-
Npp.01A000550.1	glutathione S-transferase T1 isoform X1	Glutathione S-transferase T1	Glutathione S-transferase T1	-	GO:0005515: protein binding	IPR004045: Glutathione S-transferase, N-terminal; IPR010987: Glutathione S-transferase, C-terminal-like; IPR036249: Thioredoxin-like superfamily; IPR036282: Glutathione S-transferase, C-terminal domain superfamily; IPR040075: Glutathione S-transferase Theta, N-terminal; IPR040077: Glutathione S-transferase Theta, C-terminal; IPR040079: Glutathione Transferase family; IPR043377: Glutathione S-tran…	K00799: GST,gst;glutathione S-transferase [EC:2.5.1.18]
Npp.01A000560.1	-	-	-	-	-	IPR029481: ABC-transporter N-terminal domain	-
Npp.01A000570.1	uncharacterized protein LOC8059237 isoform X2; hypothetical protein SORBI_3001G002800	-	-	-	-	IPR006869: Domain of unknown function DUF547; IPR025757: Ternary complex factor MIP1, leucine-zipper	-
Npp.01A000580.1	putative inorganic phosphate transporter 1-8	Probable inorganic phosphate transporter 1-8	Probable inorganic phosphate transporter 1-8	KOG0252: Inorganic phosphate transporter	GO:0005315: inorganic phosphate transmembrane transporter activity; GO:0006817: phosphate ion transport; GO:0016021: integral component of membrane; GO:0055085: transmembrane transport	IPR004738: Phosphate permease; IPR005828: Major facilitator, sugar transporter-like; IPR020846: Major facilitator superfamily domain; IPR036259: MFS transporter superfamily	K08176: PHO84;MFS transporter,PHS family,inorganic phosphate transporter
Npp.01A000590.1	serine/threonine-protein phosphatase PP1	Serine/threonine-protein phosphatase PP1 isozyme 1	Serine/threonine-protein phosphatase PP1 isozyme 1	-	GO:0016787: hydrolase activity	IPR004843: Calcineurin-like phosphoesterase domain, ApaH type; IPR006186: Serine/threonine-specific protein phosphatase/bis(5-nucleosyl)-tetraphosphatase; IPR029052: Metallo-dependent phosphatase-like; IPR031675: Serine-threonine protein phosphatase, N-terminal	K06269: PPP1C;serine/threonine-protein phosphatase PP1 catalytic subunit [EC:3.1.3.16]
Npp.01A000600.1	uncharacterized protein LOC110431931 isoform X1	Activating signal cointegrator 1	Activating signal cointegrator 1	-	-	IPR007374: ASCH domain; IPR015947: PUA-like superfamily; IPR039128: Activating signal cointegrator 1-like	K23398: TRIP4;activating signal cointegrator 1
Npp.01A000610.1	putative AP2/EREBP transcription factor superfamily protein; hypothetical protein BAE44_0008792	Ethylene-response factor C3	Ethylene-response factor C3	-	GO:0003677: DNA binding; GO:0003700: DNA binding transcription factor activity; GO:0006355: regulation of transcription, DNA-templated	IPR001471: AP2/ERF domain; IPR016177: DNA-binding domain superfamily; IPR036955: AP2/ERF domain superfamily	K14516: ERF1;ethylene-responsive transcription factor 1
Npp.01A000620.1	subtilisin-like protease SBT5.3; hypothetical protein SETIT_6G113300v2	Subtilisin-like protease SBT5.3	Subtilisin-like protease SBT5.3	-	GO:0004252: serine-type endopeptidase activity; GO:0006508: proteolysis	IPR000209: Peptidase S8/S53 domain; IPR003137: PA domain; IPR010259: Peptidase S8 propeptide/proteinase inhibitor I9; IPR015500: Peptidase S8, subtilisin-related; IPR023828: Peptidase S8, subtilisin, Ser-active site; IPR034197: Cucumisin-like catalytic domain; IPR036852: Peptidase S8/S53 domain superfamily; IPR037045: Peptidase S8 propeptide/proteinase inhibitor I9 superfamily; IPR041469: Subtili…	-
Npp.01A000630.1	anthocyanidin 3-O-glucoside 6&apos;&apos;-O-acyltransferase	Phenolic glucoside malonyltransferase 1	Phenolic glucoside malonyltransferase 1	-	GO:0016747: transferase activity, transferring acyl groups other than amino-acyl groups	IPR003480: Transferase; IPR023213: Chloramphenicol acetyltransferase-like domain superfamily	-
Npp.01A000640.1	myosin-6 isoform X2	Myosin-8	Myosin-8	-	GO:0003774: motor activity; GO:0005515: protein binding; GO:0005524: ATP binding; GO:0007015: actin filament organization; GO:0016459: myosin complex	IPR000048: IQ motif, EF-hand binding site; IPR001609: Myosin head, motor domain; IPR002710: Dilute domain; IPR004009: Myosin, N-terminal, SH3-like; IPR027417: P-loop containing nucleoside triphosphate hydrolase; IPR036018: Plant myosin, class XI, motor domain; IPR036961: Kinesin motor domain superfamily; IPR037975: Class XI myosin, cargo binding domain	K10357: MYO5;myosin V
Npp.01A000660.1	uncharacterized protein LOC100839142	Probable serine/threonine-protein kinase SIS8; Mitogen-activated protein kinase kinase kinase 13-A	Probable serine/threonine-protein kinase SIS8; Mitogen-activated protein kinase kinase kinase 13-A	-	GO:0004672: protein kinase activity; GO:0005515: protein binding; GO:0005524: ATP binding; GO:0006468: protein phosphorylation	IPR000270: PB1 domain; IPR000719: Protein kinase domain; IPR001245: Serine-threonine/tyrosine-protein kinase, catalytic domain; IPR008271: Serine/threonine-protein kinase, active site; IPR011009: Protein kinase-like domain superfamily; IPR017441: Protein kinase, ATP binding site	-
Npp.01A000670.1	leunig-related3; hypothetical protein GQ55_9G001500	Nuclear distribution protein PAC1	Nuclear distribution protein PAC1	-	GO:0005515: protein binding	IPR001680: WD40 repeat; IPR006594: LIS1 homology motif; IPR015943: WD40/YVTN repeat-like-containing domain superfamily; IPR017986: WD40-repeat-containing domain; IPR019775: WD40 repeat, conserved site; IPR036322: WD40-repeat-containing domain superfamily	-
Npp.01A000680.1	COP1-interacting protein-related	-	-	-	-	-	-
Npp.01A000690.1	serine/threonine-protein phosphatase PP1	Serine/threonine-protein phosphatase PP1 isozyme 1	Serine/threonine-protein phosphatase PP1 isozyme 1	-	GO:0016787: hydrolase activity	IPR004843: Calcineurin-like phosphoesterase domain, ApaH type; IPR006186: Serine/threonine-specific protein phosphatase/bis(5-nucleosyl)-tetraphosphatase; IPR029052: Metallo-dependent phosphatase-like; IPR031675: Serine-threonine protein phosphatase, N-terminal	-
Npp.01A000700.1	uncharacterized protein LOC110431931 isoform X1	Activating signal cointegrator 1	Activating signal cointegrator 1	-	-	-	K23398: TRIP4;activating signal cointegrator 1
Npp.01A000710.1	hypothetical protein SORBI_3001G250800, partial	-	-	-	-	-	-
Npp.01A000720.1	subtilisin-like protease SBT5.3; hypothetical protein SETIT_6G113300v2	Subtilisin-like protease SBT5.3	Subtilisin-like protease SBT5.3	-	GO:0004252: serine-type endopeptidase activity; GO:0006508: proteolysis	IPR000209: Peptidase S8/S53 domain; IPR003137: PA domain; IPR010259: Peptidase S8 propeptide/proteinase inhibitor I9; IPR015500: Peptidase S8, subtilisin-related; IPR023828: Peptidase S8, subtilisin, Ser-active site; IPR034197: Cucumisin-like catalytic domain; IPR036852: Peptidase S8/S53 domain superfamily; IPR037045: Peptidase S8 propeptide/proteinase inhibitor I9 superfamily; IPR041469: Subtili…	-
Npp.01A000730.1	anthocyanidin 3-O-glucoside 6&apos;&apos;-O-acyltransferase	Malonyl-CoA:anthocyanidin 5-O-glucoside-6&apos;&apos;-O-malonyltransferase; Agmatine coumaroyltransferase	Malonyl-CoA:anthocyanidin 5-O-glucoside-6&apos;&apos;-O-malonyltransferase; Agmatine coumaroyltransferase	-	GO:0016747: transferase activity, transferring acyl groups other than amino-acyl groups	IPR003480: Transferase; IPR023213: Chloramphenicol acetyltransferase-like domain superfamily	-
Npp.01A000740.1	myosin-6 isoform X2; hypothetical protein SETIT_9G002200v2	Myosin-8	Myosin-8	-	-	-	-
Npp.01A000750.1	uncharacterized protein LOC8061372	OTU domain-containing protein 5-A; OVARIAN TUMOR DOMAIN-containing deubiquitinating enzyme 9	OTU domain-containing protein 5-A; OVARIAN TUMOR DOMAIN-containing deubiquitinating enzyme 9	KOG2605: OTU (ovarian tumor)-like cysteine protease	-	IPR003323: OTU domain; IPR038765: Papain-like cysteine peptidase superfamily	-
Npp.01A000760.1	ruBisCO large subunit-binding protein subunit alpha	60 kDa chaperonin 1; RuBisCO large subunit-binding protein subunit alpha, chloroplastic	60 kDa chaperonin 1; RuBisCO large subunit-binding protein subunit alpha, chloroplastic	KOG0356: Mitochondrial chaperonin, Cpn60/Hsp60p	GO:0005524: ATP binding; GO:0042026: protein refolding	IPR001844: Chaperonin Cpn60; IPR002423: Chaperonin Cpn60/TCP-1 family; IPR018370: Chaperonin Cpn60, conserved site; IPR027409: GroEL-like apical domain superfamily; IPR027410: TCP-1-like chaperonin intermediate domain superfamily; IPR027413: GroEL-like equatorial domain superfamily	-
Npp.01A000770.1	RNA polymerase sigma factor sigF, chloroplastic isoform X3	RNA polymerase sigma factor sigF, chloroplastic	RNA polymerase sigma factor sigF, chloroplastic	-	GO:0003700: DNA binding transcription factor activity; GO:0006352: DNA-templated transcription, initiation; GO:0006355: regulation of transcription, DNA-templated	IPR000943: RNA polymerase sigma-70; IPR007624: RNA polymerase sigma-70 region 3; IPR007627: RNA polymerase sigma-70 region 2; IPR007630: RNA polymerase sigma-70 region 4; IPR013324: RNA polymerase sigma factor, region 3/4-like; IPR013325: RNA polymerase sigma factor, region 2; IPR014284: RNA polymerase sigma-70 like domain; IPR016262: RNA polymerase sigma factor, SigB/C/D/F, plastid; IPR036388: W…	-
Npp.01A000780.1	protein DETOXIFICATION 56	Protein DETOXIFICATION 56	Protein DETOXIFICATION 56	-	GO:0015297: antiporter activity; GO:0016020: membrane; GO:0042910: xenobiotic transmembrane transporter activity; GO:0055085: transmembrane transport	IPR002528: Multi antimicrobial extrusion protein	K03327: TC.MATE,SLC47A,norM,mdtK,dinF;multidrug resistance protein,MATE family
Npp.01A000790.1	pentatricopeptide repeat-containing protein At4g18840	Pentatricopeptide repeat-containing protein At4g14820	Pentatricopeptide repeat-containing protein At4g14820	-	GO:0005515: protein binding	IPR002885: Pentatricopeptide repeat; IPR011990: Tetratricopeptide-like helical domain superfamily	-
Npp.01A000810.1	CASP-like protein 1U2; hypothetical protein SHCRBa_133_K20_R_180	CASP-like protein 1U2	CASP-like protein 1U2	-	-	IPR006702: Casparian strip membrane protein domain	-
Npp.01A000820.1	phosphoglycolate phosphatase 2 isoform X1	Phosphoglycolate phosphatase 2	Phosphoglycolate phosphatase 2	KOG2882: p-Nitrophenyl phosphatase	GO:0016791: phosphatase activity	IPR006349: 2-phosphoglycolate phosphatase, eukaryotic; IPR006357: HAD-superfamily hydrolase, subfamily IIA; IPR023214: HAD superfamily; IPR036412: HAD-like superfamily	K19269: PGP,PGLP;phosphoglycolate phosphatase [EC:3.1.3.18 3.1.3.48]
Npp.01A000830.1	CASP-like protein 1U2; hypothetical protein SHCRBa_133_K20_R_180	CASP-like protein 1U2	CASP-like protein 1U2	-	-	IPR006702: Casparian strip membrane protein domain	-
Npp.01A000850.1	probable xyloglucan endotransglucosylase/hydrolase protein 30	Probable xyloglucan endotransglucosylase/hydrolase protein 30	Probable xyloglucan endotransglucosylase/hydrolase protein 30	-	GO:0004553: hydrolase activity, hydrolyzing O-glycosyl compounds; GO:0005618: cell wall; GO:0010411: xyloglucan metabolic process; GO:0016762: xyloglucan:xyloglucosyl transferase activity; GO:0042546: cell wall biogenesis; GO:0048046: apoplast	IPR000757: Glycoside hydrolase family 16; IPR010713: Xyloglucan endo-transglycosylase, C-terminal; IPR013320: Concanavalin A-like lectin/glucanase domain superfamily; IPR016455: Xyloglucan endotransglucosylase/hydrolase	K08235: E2.4.1.207;xyloglucan:xyloglucosyl transferase [EC:2.4.1.207]
Npp.01A000870.1	inactive poly	Probable inactive poly [ADP-ribose] polymerase SRO1	Probable inactive poly [ADP-ribose] polymerase SRO1	-	GO:0003950: NAD+ ADP-ribosyltransferase activity	IPR012317: Poly(ADP-ribose) polymerase, catalytic domain; IPR022003: RST domain of plant C-terminal	-
Npp.01A000890.1	probable WRKY transcription factor 35 isoform X1	WRKY transcription factor 22	WRKY transcription factor 22	-	GO:0003700: DNA binding transcription factor activity; GO:0006355: regulation of transcription, DNA-templated; GO:0043565: sequence-specific DNA binding	IPR003657: WRKY domain; IPR036576: WRKY domain superfamily	-
Npp.01A000900.1	uncharacterized protein LOC8061386 isoform X1; hypothetical protein BAE44_0015078	-	-	-	GO:0005515: protein binding	IPR001810: F-box domain; IPR005174: Domain unknown function DUF295; IPR036047: F-box-like domain superfamily	-
Npp.01A000910.1	outer envelope pore protein 24, chloroplastic isoform X2	Outer envelope pore protein 24, chloroplastic	Outer envelope pore protein 24, chloroplastic	-	-	-	-
Npp.01A000920.1	S-norcoclaurine synthase 1	Feruloyl CoA ortho-hydroxylase F6H1-1	Feruloyl CoA ortho-hydroxylase F6H1-1	-	-	-	-
Npp.01A000930.1	S-norcoclaurine synthase 1	-	-	-	GO:0016491: oxidoreductase activity; GO:0055114: oxidation-reduction process	IPR005123: Oxoglutarate/iron-dependent dioxygenase; IPR026992: Non-haem dioxygenase N-terminal domain; IPR027443: Isopenicillin N synthase-like	-
Npp.01A000940.1	Pentatricopeptide repeat-containing protein	Pentatricopeptide repeat-containing protein At5g46580, chloroplastic	Pentatricopeptide repeat-containing protein At5g46580, chloroplastic	-	GO:0005515: protein binding	IPR002625: Smr domain; IPR002885: Pentatricopeptide repeat; IPR011990: Tetratricopeptide-like helical domain superfamily	-
Npp.01A000950.1	ATP-dependent DNA helicase 2 subunit KU80; hypothetical protein GQ55_9G004500	ATP-dependent DNA helicase 2 subunit KU80; X-ray repair cross-complementing protein 5	ATP-dependent DNA helicase 2 subunit KU80; X-ray repair cross-complementing protein 5	-	GO:0003677: DNA binding; GO:0006303: double-strand break repair via nonhomologous end joining	IPR005161: Ku70/Ku80, N-terminal alpha/beta; IPR006164: Ku70/Ku80 beta-barrel domain; IPR016194: SPOC-like, C-terminal domain superfamily; IPR036465: von Willebrand factor A-like domain superfamily	-
Npp.01A000970.1	TRF-like 10; uncharacterized protein LOC103626481 isoform X1	-	-	-	-	IPR011011: Zinc finger, FYVE/PHD-type; IPR013083: Zinc finger, RING/FYVE/PHD-type; IPR017877: Myb-like domain; IPR019787: Zinc finger, PHD-finger	-
Npp.01A000980.1	heat stress transcription factor A-1	Heat stress transcription factor A-1	Heat stress transcription factor A-1	-	GO:0003700: DNA binding transcription factor activity; GO:0006355: regulation of transcription, DNA-templated; GO:0042025: host cell nucleus; GO:0043565: sequence-specific DNA binding	IPR000232: Heat shock factor (HSF)-type, DNA-binding; IPR027725: Heat shock transcription factor family; IPR036388: Winged helix-like DNA-binding domain superfamily; IPR036390: Winged helix DNA-binding domain superfamily	K09419: HSFF;heat shock transcription factor,other eukaryote
Npp.01A000990.1	protein NUCLEAR FUSION DEFECTIVE 2; hypothetical protein Zm00014a_034450	-	-	-	GO:0004525: ribonuclease III activity; GO:0006396: RNA processing	IPR000999: Ribonuclease III domain; IPR036389: Ribonuclease III, endonuclease domain superfamily	-
Npp.01A001000.1	RNA-binding protein 34	Nucleolar protein 12	Nucleolar protein 12	-	GO:0003676: nucleic acid binding	IPR000504: RNA recognition motif domain; IPR012677: Nucleotide-binding alpha-beta plait domain superfamily; IPR034220: RBM34, RNA recognition motif 1; IPR035979: RNA-binding domain superfamily	K14837: NOP12;nucleolar protein 12
Npp.01A001010.1	exosome complex exonuclease RRP46 homolog	Exosome complex exonuclease RRP46 homolog	Exosome complex exonuclease RRP46 homolog	KOG1069: Exosomal 3'-5' exoribonuclease complex, subunit Rrp46	-	IPR001247: Exoribonuclease, phosphorolytic domain 1; IPR020568: Ribosomal protein S5 domain 2-type fold; IPR027408: PNPase/RNase PH domain superfamily; IPR036345: Exoribonuclease, PH domain 2 superfamily	K12590: RRP46,EXOSC5;exosome complex component RRP46
Npp.01A001020.1	probable ADP-ribosylation factor GTPase-activating protein AGD8	Probable ADP-ribosylation factor GTPase-activating protein AGD8	Probable ADP-ribosylation factor GTPase-activating protein AGD8	KOG0704: ADP-ribosylation factor GTPase activator; KOG0706: Predicted GTPase-activating protein	GO:0005096: GTPase activator activity	IPR001164: Arf GTPase activating protein; IPR037278: ARFGAP/RecO-like zinc finger; IPR038508: ArfGAP domain superfamily	K12493: ARFGAP2_3;ADP-ribosylation factor GTPase-activating protein 2/3
Npp.01A001030.1	putative gamma-glutamylcyclotransferase At3g02910; hypothetical protein SORBI_3001G007700	Putative gamma-glutamylcyclotransferase At3g02910	Putative gamma-glutamylcyclotransferase At3g02910	KOG4450: Uncharacterized conserved protein	GO:0061929: gamma-glutamylaminecyclotransferase activity	IPR009288: Gamma-glutamylcyclotransferase, AIG2-like; IPR013024: Gamma-glutamyl cyclotransferase-like; IPR036568: Gamma-glutamyl cyclotransferase-like superfamily; IPR039126: Gamma-glutamylaminecyclotransferase	K19761: GGACT;gamma-glutamylaminecyclotransferase [EC:2.3.2.-]
Npp.01A001040.1	DDB1- and CUL4-associated factor 13; protein SOF1	DDB1- and CUL4-associated factor 13	DDB1- and CUL4-associated factor 13	KOG0268: Sof1-like rRNA processing protein (contains WD40 repeats); KOG0278: Serine/threonine kinase receptor-associated protein	GO:0005515: protein binding	IPR001680: WD40 repeat; IPR007287: Sof1-like protein; IPR015943: WD40/YVTN repeat-like-containing domain superfamily; IPR017986: WD40-repeat-containing domain; IPR019775: WD40 repeat, conserved site; IPR020472: G-protein beta WD-40 repeat; IPR036322: WD40-repeat-containing domain superfamily	K11806: DCAF13,WDSOF1;DDB1- and CUL4-associated factor 13
Npp.01A001050.1	hypothetical protein C2845_PM09G10140; protein BCCIP homolog isoform X2	Protein BCCIP homolog	Protein BCCIP homolog	KOG3034: Isoamyl acetate-hydrolyzing esterase and related enzymes	GO:0005515: protein binding	IPR002885: Pentatricopeptide repeat; IPR011990: Tetratricopeptide-like helical domain superfamily; IPR025602: BCP1 family	-
Npp.01A001060.1	uncharacterized protein LOC8060854	-	-	-	-	IPR009724: TMEM70 family	K17966: TMEM70;transmembrane protein 70,mitochondrial
Npp.01A001070.1	transcriptional repressor ILP1	PAX3- and PAX7-binding protein 1	PAX3- and PAX7-binding protein 1	KOG2136: Transcriptional regulators binding to the GC-rich sequences	GO:0003677: DNA binding; GO:0005634: nucleus; GO:0006355: regulation of transcription, DNA-templated	IPR012890: GC-rich sequence DNA-binding factor; IPR022783: GC-rich sequence DNA-binding factor-like domain	K13211: GCFC;GC-rich sequence DNA-binding factor
Npp.01A001080.1	uncharacterized protein LOC8060855	-	-	-	-	-	-
Npp.01A001090.1	protein Brevis radix-like 4	Protein Brevis radix-like 4	Protein Brevis radix-like 4	-	-	IPR013591: Brevis radix (BRX) domain	-
Npp.01A001100.1	cleavage and polyadenylation specificity factor subunit 3-I	Endoribonuclease ysh1; Cleavage and polyadenylation specificity factor subunit 3-I	Endoribonuclease ysh1; Cleavage and polyadenylation specificity factor subunit 3-I	KOG1135: mRNA cleavage and polyadenylation factor II complex, subunit CFT2 (CPSF subunit); KOG1136: Predicted cleavage and polyadenylation specificity factor (CPSF subunit); KOG1137: mRNA cleavage and polyadenylation factor II complex, BRR5 (CPSF subunit)	-	IPR001279: Metallo-beta-lactamase; IPR011108: Zn-dependent metallo-hydrolase, RNA specificity domain; IPR021718: Pre-mRNA 3'-end-processing endonuclease polyadenylation factor C-term; IPR022712: Beta-Casp domain; IPR036866: Ribonuclease Z/Hydroxyacylglutathione hydrolase-like	K14403: CPSF3,YSH1;cleavage and polyadenylation specificity factor subunit 3 [EC:3.1.27.-]
Npp.01A001110.1	cleavage and polyadenylation specificity factor subunit 3-I	Endoribonuclease ysh1; Cleavage and polyadenylation specificity factor subunit 3-I	Endoribonuclease ysh1; Cleavage and polyadenylation specificity factor subunit 3-I	KOG1136: Predicted cleavage and polyadenylation specificity factor (CPSF subunit); KOG1137: mRNA cleavage and polyadenylation factor II complex, BRR5 (CPSF subunit)	-	IPR021718: Pre-mRNA 3'-end-processing endonuclease polyadenylation factor C-term; IPR022712: Beta-Casp domain; IPR036866: Ribonuclease Z/Hydroxyacylglutathione hydrolase-like	-
Npp.01A001120.1	non-specific phospholipase C4	Non-specific phospholipase C4	Non-specific phospholipase C4	-	GO:0016788: hydrolase activity, acting on ester bonds	IPR007312: Phosphoesterase; IPR017850: Alkaline-phosphatase-like, core domain superfamily	K01114: plc;phospholipase C [EC:3.1.4.3]
Npp.01A001130.1	LOW QUALITY PROTEIN: uncharacterized protein ycf20	Ycf20-like protein	Ycf20-like protein	-	-	IPR007572: Uncharacterised protein family Ycf20	-
Npp.01A001140.1	uncharacterized protein LOC8061398; hypothetical protein SHCRBa_261_M16_R_310	-	-	-	-	-	-
Npp.01A001150.1	hypothetical protein GQ55_9G007100	-	-	-	-	-	-
Npp.01A001160.1	hypothetical protein BAE44_0010580	-	-	-	-	-	-
Npp.01A001170.1	uncharacterized protein LOC8060860; hypothetical protein SORBI_3001G009100	-	-	-	-	-	-
Npp.01A001180.1	uncharacterized protein LOC8064466; hypothetical protein SORBI_3009G170600	-	-	-	-	-	-
Npp.01A001190.1	5-oxoprolinase; hypothetical protein GQ55_9G426200	5-oxoprolinase	5-oxoprolinase	KOG1939: Oxoprolinase	GO:0016787: hydrolase activity	IPR002821: Hydantoinase A/oxoprolinase; IPR008040: Hydantoinaseoxoprolinase, N-terminal	K01469: OPLAH,OXP1,oplAH;5-oxoprolinase (ATP-hydrolysing) [EC:3.5.2.9]
Npp.01A001200.1	5-oxoprolinase	-	-	KOG1939: Oxoprolinase	GO:0003824: catalytic activity	IPR003692: Hydantoinase B/oxoprolinase	-
Npp.01A001210.1	uncharacterized protein At5g65660 isoform X1; hypothetical protein GQ55_9G007500	-	-	-	-	IPR037699: Uncharacterized protein At5g65660-like	-
Npp.01A001220.1	uncharacterized protein LOC101784037; hypothetical protein ZEAMMB73_Zm00001d027597	-	-	-	-	-	-
Npp.01A001230.1	uncharacterized protein LOC8080596	-	-	-	-	IPR021916: Protein of unknown function DUF3527	-
Npp.01A001240.1	hypothetical protein GQ55_7G051600	-	-	-	-	-	-
Npp.01A001250.1	protein NRT1/ PTR FAMILY 5.2	Protein NRT1/ PTR FAMILY 5.2	Protein NRT1/ PTR FAMILY 5.2	-	GO:0016020: membrane; GO:0022857: transmembrane transporter activity; GO:0055085: transmembrane transport	IPR000109: Proton-dependent oligopeptide transporter family; IPR036259: MFS transporter superfamily	-
Npp.01A001260.1	protein BZR1 homolog 4	Protein BZR1 homolog 3	Protein BZR1 homolog 3	-	GO:0003700: DNA binding transcription factor activity; GO:0006351: transcription, DNA-templated; GO:0009742: brassinosteroid mediated signaling pathway	IPR008540: BES1/BZR1 plant transcription factor, N-terminal; IPR033264: BZR family	-
Npp.01A001270.1	hypothetical protein BAE44_0011766; splicing factor U2af large subunit A	Splicing factor U2AF 50 kDa subunit	Splicing factor U2AF 50 kDa subunit	KOG0120: Splicing factor U2AF, large subunit (RRM superfamily)	GO:0003676: nucleic acid binding	IPR000504: RNA recognition motif domain; IPR012677: Nucleotide-binding alpha-beta plait domain superfamily; IPR035979: RNA-binding domain superfamily	K12837: U2AF2;splicing factor U2AF 65 kDa subunit
Npp.01A001280.1	very-long-chain 3-oxoacyl-CoA reductase 1	Very-long-chain 3-oxoacyl-CoA reductase 1	Very-long-chain 3-oxoacyl-CoA reductase 1	KOG1014: 17 beta-hydroxysteroid dehydrogenase type 3, HSD17B3	-	IPR002347: Short-chain dehydrogenase/reductase SDR; IPR036291: NAD(P)-binding domain superfamily	-
Npp.01A001290.1	Cytochrome P450 86B1; noroxomaritidine synthase	Cytochrome P450 86B1	Cytochrome P450 86B1	-	GO:0005506: iron ion binding; GO:0016705: oxidoreductase activity, acting on paired donors, with incorporation or reduction of molecular oxygen; GO:0020037: heme binding; GO:0055114: oxidation-reduction process	IPR001128: Cytochrome P450; IPR002401: Cytochrome P450, E-class, group I; IPR017972: Cytochrome P450, conserved site; IPR036396: Cytochrome P450 superfamily	-
Npp.01A001300.1	alkane hydroxylase MAH1	Cytochrome P450 86B1	Cytochrome P450 86B1	-	GO:0005506: iron ion binding; GO:0016705: oxidoreductase activity, acting on paired donors, with incorporation or reduction of molecular oxygen; GO:0020037: heme binding; GO:0055114: oxidation-reduction process	IPR001128: Cytochrome P450; IPR002401: Cytochrome P450, E-class, group I; IPR017972: Cytochrome P450, conserved site; IPR036396: Cytochrome P450 superfamily	-
Npp.01A001310.1	Cytochrome P450 86B1; noroxomaritidine synthase	Cytochrome P450 86B1	Cytochrome P450 86B1	-	GO:0005506: iron ion binding; GO:0016705: oxidoreductase activity, acting on paired donors, with incorporation or reduction of molecular oxygen; GO:0020037: heme binding; GO:0055114: oxidation-reduction process	IPR001128: Cytochrome P450; IPR002401: Cytochrome P450, E-class, group I; IPR036396: Cytochrome P450 superfamily	-
Npp.01A001320.1	U2 small nuclear ribonucleoprotein A&apos;	U2 small nuclear ribonucleoprotein A&apos;	U2 small nuclear ribonucleoprotein A&apos;	KOG1644: U2-associated snRNP A' protein	GO:0005515: protein binding	IPR001611: Leucine-rich repeat; IPR032675: Leucine-rich repeat domain superfamily	K11092: SNRPA1;U2 small nuclear ribonucleoprotein A'
Npp.01A001330.1	probable acyl-activating enzyme 16, chloroplastic	-	-	-	GO:0003824: catalytic activity	IPR000873: AMP-dependent synthetase/ligase; IPR042099: AMP-dependent synthetase-like superfamily	-
Npp.01A001340.1	hypothetical protein SORBI_3001G014300; probable F-box protein At4g22165 isoform X4	-	-	-	-	-	-
Npp.01A001350.1	cyclin-dependent kinase F-3; hypothetical protein C2845_PM01G48690	Serine/threonine-protein kinase MHK; Cyclin-dependent kinase F-3	Serine/threonine-protein kinase MHK; Cyclin-dependent kinase F-3	KOG0661: MAPK related serine/threonine protein kinase	GO:0004672: protein kinase activity; GO:0005524: ATP binding; GO:0006468: protein phosphorylation	IPR000719: Protein kinase domain; IPR008271: Serine/threonine-protein kinase, active site; IPR011009: Protein kinase-like domain superfamily	K08829: MAK;male germ cell-associated kinase [EC:2.7.11.22]
Npp.01A001360.1	uncharacterized protein At1g28695	Uncharacterized protein At4g15970	Uncharacterized protein At4g15970	-	-	IPR005069: Nucleotide-diphospho-sugar transferase	-
Npp.01A001370.1	uncharacterized protein At4g15970-like	Uncharacterized protein At4g15970	Uncharacterized protein At4g15970	-	-	IPR005069: Nucleotide-diphospho-sugar transferase	-
Npp.01A001380.1	conserved oligomeric Golgi complex subunit 2	Conserved oligomeric Golgi complex subunit 2	Conserved oligomeric Golgi complex subunit 2	KOG2307: Low density lipoprotein receptor	GO:0007030: Golgi organization; GO:0015031: protein transport; GO:0016020: membrane	IPR009316: COG complex component, COG2; IPR024602: Conserved oligomeric Golgi complex, subunit 2, N-terminal; IPR024603: COG complex component, COG2, C-terminal	K20289: COG2;conserved oligomeric Golgi complex subunit 2
Npp.01A001390.1	RPM1-interacting protein 4-like isoform X1	-	-	-	-	IPR008700: RIN4, pathogenic type III effector avirulence factor Avr cleavage site; IPR040387: RPM1-interacting protein 4/NOI4	K13456: RIN4;RPM1-interacting protein 4
Npp.01A001400.1	B-cell receptor-associated protein 31	-	-	-	GO:0005783: endoplasmic reticulum; GO:0006886: intracellular protein transport; GO:0016021: integral component of membrane	IPR008417: B-cell receptor-associated protein 29/31	K14009: BCAP31,BAP31;B-cell receptor-associated protein 31
Npp.01A001410.1	PREDICTED: actin-related protein 2/3 complex subunit 4 isoform X1	Actin-related protein 2/3 complex subunit 4	Actin-related protein 2/3 complex subunit 4	KOG1876: Actin-related protein Arp2/3 complex, subunit ARPC4	GO:0005885: Arp2/3 protein complex; GO:0015629: actin cytoskeleton; GO:0030041: actin filament polymerization; GO:0034314: Arp2/3 complex-mediated actin nucleation	IPR008384: Actin-related protein 2/3 complex subunit 4; IPR034666: Arp2/3 complex subunit 2/4	K05755: ARPC4;actin related protein 2/3 complex,subunit 4
Npp.01A001420.1	uncharacterized protein LOC8080151	-	-	-	GO:0008270: zinc ion binding	IPR007527: Zinc finger, SWIM-type	-
Npp.01A001430.1	kinetochore protein nuf2	Kinetochore protein NUF2 homolog	Kinetochore protein NUF2 homolog	-	GO:0000776: kinetochore; GO:0031262: Ndc80 complex	IPR005549: Kinetochore protein Nuf2; IPR038275: Nuf2, N-terminal domain superfamily	K11548: NUF2,CDCA1;kinetochore protein Nuf2
Npp.01A001440.1	uncharacterized protein LOC8080155	-	-	-	-	-	-
Npp.01A001450.1	RecName: Full=4-hydroxyphenylacetaldehyde oxime monooxygenase; AltName: Full=Cytochrome P450 71E1 &gt;AAC39318.1 cytochrome P450 CYP71E1; hypothetical protein PAHAL_9G010900	Cytochrome P450 71B7	Cytochrome P450 71B7	-	GO:0005506: iron ion binding; GO:0016705: oxidoreductase activity, acting on paired donors, with incorporation or reduction of molecular oxygen; GO:0020037: heme binding; GO:0055114: oxidation-reduction process	IPR001128: Cytochrome P450; IPR002401: Cytochrome P450, E-class, group I; IPR017972: Cytochrome P450, conserved site; IPR036396: Cytochrome P450 superfamily	-
Npp.01A001460.1	uncharacterized protein LOC8060879; hypothetical protein SORBI_3001G013900	Arginine decarboxylase	Arginine decarboxylase	-	GO:0003824: catalytic activity	IPR000310: Orn/Lys/Arg decarboxylase, major domain; IPR008286: Orn/Lys/Arg decarboxylase, C-terminal; IPR015421: Pyridoxal phosphate-dependent transferase, major domain; IPR015424: Pyridoxal phosphate-dependent transferase; IPR036633: Orn/Lys/Arg decarboxylase, C-terminal domain superfamily	-
Npp.01A001470.1	CRIB domain-containing protein RIC4 isoform X3	-	-	-	-	IPR000095: CRIB domain	-
Npp.01A001480.1	myb-like protein X isoform X1; hypothetical protein Zm00014a_034404	-	-	-	-	-	-
Npp.01A001490.1	cyclin-dependent kinase F-3; hypothetical protein C2845_PM01G48690	Serine/threonine-protein kinase MHK; Cyclin-dependent kinase F-3	Serine/threonine-protein kinase MHK; Cyclin-dependent kinase F-3	KOG0661: MAPK related serine/threonine protein kinase	GO:0004672: protein kinase activity; GO:0005524: ATP binding; GO:0006468: protein phosphorylation	IPR000719: Protein kinase domain; IPR008271: Serine/threonine-protein kinase, active site; IPR011009: Protein kinase-like domain superfamily	K08829: MAK;male germ cell-associated kinase [EC:2.7.11.22]
Npp.01A001500.1	cyclin-dependent kinase F-3; hypothetical protein SORBI_3001G014300	Serine/threonine-protein kinase MHK	Serine/threonine-protein kinase MHK	KOG0661: MAPK related serine/threonine protein kinase	GO:0004672: protein kinase activity; GO:0005515: protein binding; GO:0005524: ATP binding; GO:0006468: protein phosphorylation	IPR000719: Protein kinase domain; IPR001810: F-box domain; IPR008271: Serine/threonine-protein kinase, active site; IPR011009: Protein kinase-like domain superfamily; IPR036047: F-box-like domain superfamily	-
Npp.01A001510.1	DNA-directed RNA polymerases II, IV and V subunit 8B isoform X1	DNA-directed RNA polymerases II, IV and V subunit 8B	DNA-directed RNA polymerases II, IV and V subunit 8B	KOG3400: RNA polymerase subunit 8	GO:0006351: transcription, DNA-templated	IPR005570: RNA polymerase, Rpb8; IPR012340: Nucleic acid-binding, OB-fold	K03016: RPB8,POLR2H;DNA-directed RNA polymerases I,II,and III subunit RPABC3
Npp.01A001520.1	probable glucan endo-1,3-beta-glucosidase A6	Probable glucan endo-1,3-beta-glucosidase A6	Probable glucan endo-1,3-beta-glucosidase A6	-	GO:0004553: hydrolase activity, hydrolyzing O-glycosyl compounds; GO:0005975: carbohydrate metabolic process	IPR000490: Glycoside hydrolase family 17; IPR012946: X8 domain; IPR017853: Glycoside hydrolase superfamily	-
Npp.01A001530.1	ER membrane protein complex subunit 2-A	ER membrane protein complex subunit 2-A	ER membrane protein complex subunit 2-A	KOG3060: Uncharacterized conserved protein	GO:0005515: protein binding	IPR011990: Tetratricopeptide-like helical domain superfamily; IPR013026: Tetratricopeptide repeat-containing domain; IPR039856: ER membrane protein complex subunit 2-like	K23563: EMC2,TTC35;ER membrane protein complex subunit 2
Npp.01A001540.1	probable acyl-activating enzyme 16, chloroplastic	Long-chain-fatty-acid--[acyl-carrier-protein] ligase AEE15, chloroplastic	Long-chain-fatty-acid--[acyl-carrier-protein] ligase AEE15, chloroplastic	KOG1180: Acyl-CoA synthetase	GO:0003824: catalytic activity	IPR000873: AMP-dependent synthetase/ligase; IPR020845: AMP-binding, conserved site; IPR042099: AMP-dependent synthetase-like superfamily	K01897: ACSL,fadD;long-chain acyl-CoA synthetase [EC:6.2.1.3]
Npp.01A001550.1	hypothetical protein Zm00014a_021727; uncharacterized protein LOC103645732	-	-	-	GO:0003723: RNA binding	IPR039764: RNA binding protein HABP4/SERBP1	-
Npp.01A001560.1	Pirin-like protein	Pirin-like protein; Putative quercetin 2,3-dioxygenase PA3240	Pirin-like protein; Putative quercetin 2,3-dioxygenase PA3240	-	-	IPR003829: Pirin, N-terminal domain; IPR008778: Pirin, C-terminal domain; IPR011051: RmlC-like cupin domain superfamily; IPR014710: RmlC-like jelly roll fold	K06911: PIR;quercetin 2,3-dioxygenase [EC:1.13.11.24]
Npp.01A001570.1	hypothetical protein SORBI_3005G110418, partial	-	-	-	-	IPR025558: Domain of unknown function DUF4283; IPR040256: Uncharacterized protein At4g02000-like	-
Npp.01A001580.1	-	30S ribosomal protein S1	30S ribosomal protein S1	-	GO:0003676: nucleic acid binding	IPR003029: S1 domain; IPR012340: Nucleic acid-binding, OB-fold; IPR022967: RNA-binding domain, S1	-
Npp.01A001590.1	hypothetical protein SORBI_3001G015300	-	-	-	-	IPR025322: Protein of unknown function DUF4228, plant	-
Npp.01A001600.1	glutathione S-transferase T3-like isoform X1	-	-	-	-	IPR029466: No apical meristem-associated, C-terminal domain	-
Npp.01A001620.1	mitochondrial elongation factor	Elongation factor G, mitochondrial	Elongation factor G, mitochondrial	KOG0464: Elongation factor G; KOG0465: Mitochondrial elongation factor; KOG0469: Elongation factor 2	GO:0003746: translation elongation factor activity; GO:0003924: GTPase activity; GO:0005525: GTP binding; GO:0006414: translational elongation	IPR000640: Elongation factor EFG, domain V-like; IPR000795: Transcription factor, GTP-binding domain; IPR004161: Translation elongation factor EFTu-like, domain 2; IPR004540: Translation elongation factor EFG/EF2; IPR005225: Small GTP-binding protein domain; IPR005517: Translation elongation factor EFG/EF2, domain IV; IPR009000: Translation protein, beta-barrel domain superfamily; IPR009022: Elon…	K02355: fusA,GFM,EFG;elongation factor G
Npp.01A001640.1	hypothetical protein SETIT_7G303200v2	-	-	-	GO:0003676: nucleic acid binding; GO:0008270: zinc ion binding	IPR001878: Zinc finger, CCHC-type; IPR036875: Zinc finger, CCHC-type superfamily	-
Npp.01A001650.1	ALBINO3-like protein 1, chloroplastic	Membrane protein insertase YidC	Membrane protein insertase YidC	-	GO:0016021: integral component of membrane; GO:0032977: membrane insertase activity	IPR001708: Membrane insertase YidC/ALB3/OXA1/COX18; IPR028055: Membrane insertase YidC/Oxa1, C-terminal	K03217: yidC,spoIIIJ,OXA1,ccfA;YidC/Oxa1 family membrane protein insertase
Npp.01A001660.1	GDSL esterase/lipase At3g48460	GDSL esterase/lipase At3g48460	GDSL esterase/lipase At3g48460	-	-	-	-
Npp.01A001670.1	serine/threonine protein phosphatase 2A 57 kDa regulatory subunit B&apos; theta isoform	Serine/threonine protein phosphatase 2A 59 kDa regulatory subunit B&apos; eta isoform	Serine/threonine protein phosphatase 2A 59 kDa regulatory subunit B&apos; eta isoform	KOG2085: Serine/threonine protein phosphatase 2A, regulatory subunit	GO:0000159: protein phosphatase type 2A complex; GO:0007165: signal transduction; GO:0019888: protein phosphatase regulator activity	IPR002554: Protein phosphatase 2A, regulatory B subunit, B56; IPR011989: Armadillo-like helical; IPR016024: Armadillo-type fold	K11584: PPP2R5;serine/threonine-protein phosphatase 2A regulatory subunit B'
Npp.01A001680.1	hypothetical protein GQ55_9G013300; uncharacterized protein LOC100825065 isoform X1	-	-	-	-	-	-
Npp.01A001690.1	poly(ADP-ribose) glycohydrolase 1	Poly(ADP-ribose) glycohydrolase 1	Poly(ADP-ribose) glycohydrolase 1	KOG2064: Poly(ADP-ribose) glycohydrolase	GO:0004649: poly(ADP-ribose) glycohydrolase activity; GO:0005975: carbohydrate metabolic process	IPR007724: Poly(ADP-ribose) glycohydrolase	K07759: PARG;poly(ADP-ribose) glycohydrolase [EC:3.2.1.143]
Npp.01A001700.1	probable thiol methyltransferase 2 isoform X1	Probable thiol methyltransferase 2	Probable thiol methyltransferase 2	-	GO:0008757: S-adenosylmethionine-dependent methyltransferase activity	IPR008854: TPMT family; IPR029063: S-adenosyl-L-methionine-dependent methyltransferase	K21552: HOL;methyl halide transferase [EC:2.1.1.165]
Npp.01A001710.1	pentatricopeptide repeat-containing protein At2g27610 isoform X1	Pentatricopeptide repeat-containing protein At4g13650	Pentatricopeptide repeat-containing protein At4g13650	-	GO:0005515: protein binding	IPR002885: Pentatricopeptide repeat; IPR011990: Tetratricopeptide-like helical domain superfamily	-
Npp.01A001720.1	kinetochore protein nuf2	Kinetochore protein NUF2 homolog	Kinetochore protein NUF2 homolog	-	GO:0000776: kinetochore; GO:0031262: Ndc80 complex	IPR005549: Kinetochore protein Nuf2; IPR038275: Nuf2, N-terminal domain superfamily	K11548: NUF2,CDCA1;kinetochore protein Nuf2
Npp.01A001730.1	60S ribosomal protein L17 isoform X1	60S ribosomal protein L17	60S ribosomal protein L17	KOG3353: 60S ribosomal protein L22	GO:0003735: structural constituent of ribosome; GO:0005840: ribosome; GO:0006412: translation; GO:0015934: large ribosomal subunit	IPR001063: Ribosomal protein L22/L17; IPR005721: Ribosomal protein L22/L17, eukaryotic/archaeal; IPR018260: Ribosomal protein L22/L17, conserved site; IPR036394: Ribosomal protein L22/L17 superfamily	K02880: RP-L17e,RPL17;large subunit ribosomal protein L17e
Npp.01A001740.1	protein FAR1-RELATED SEQUENCE 6	Protein FAR1-RELATED SEQUENCE 8	Protein FAR1-RELATED SEQUENCE 8	-	GO:0006355: regulation of transcription, DNA-templated; GO:0008270: zinc ion binding	IPR004330: FAR1 DNA binding domain; IPR006564: Zinc finger, PMZ-type; IPR007527: Zinc finger, SWIM-type; IPR018289: MULE transposase domain; IPR031052: FHY3/FAR1 family	-
Npp.01A001750.1	probable ion channel CASTOR isoform X2	Probable ion channel CASTOR	Probable ion channel CASTOR	-	-	IPR010420: CASTOR/POLLUX/SYM8 ion channels	K21866: POLLUX,DMI1,CASTOR;ion channel POLLUX/CASTOR
Npp.01A001760.1	sister chromatid cohesion protein DCC1; hypothetical protein C2845_PM01G25930	Sister chromatid cohesion protein DCC1	Sister chromatid cohesion protein DCC1	KOG0798: Uncharacterized conserved protein	GO:0007064: mitotic sister chromatid cohesion; GO:0031390: Ctf18 RFC-like complex	IPR019128: Sister chromatid cohesion protein Dcc1	K11271: DSCC1,DCC1;sister chromatid cohesion protein DCC1
Npp.01A001770.1	putative RNA-binding protein Luc7-like 1 isoform X1	Putative RNA-binding protein Luc7-like 1	Putative RNA-binding protein Luc7-like 1	KOG0796: Spliceosome subunit	GO:0003729: mRNA binding; GO:0005685: U1 snRNP; GO:0006376: mRNA splice site selection	IPR004882: Luc7-related	-
Npp.01A001780.1	30S ribosomal protein S6 alpha, chloroplastic	30S ribosomal protein S6 alpha, chloroplastic	30S ribosomal protein S6 alpha, chloroplastic	-	GO:0003735: structural constituent of ribosome; GO:0005840: ribosome; GO:0006412: translation; GO:0019843: rRNA binding	IPR000529: Ribosomal protein S6; IPR014717: Translation elongation factor EF1B/ribosomal protein S6; IPR020814: Ribosomal protein S6, plastid/chloroplast; IPR035980: Ribosomal protein S6 superfamily	K02990: RP-S6,MRPS6,rpsF;small subunit ribosomal protein S6
Npp.01A001790.1	uncharacterized protein LOC110437391 isoform X2	-	-	-	-	IPR015947: PUA-like superfamily	-
Npp.01A001800.1	11-beta-hydroxysteroid dehydrogenase-like 5	11-beta-hydroxysteroid dehydrogenase-like 5	11-beta-hydroxysteroid dehydrogenase-like 5	-	GO:0016491: oxidoreductase activity	IPR002347: Short-chain dehydrogenase/reductase SDR; IPR020904: Short-chain dehydrogenase/reductase, conserved site; IPR036291: NAD(P)-binding domain superfamily	K22418: HSD1;11beta/17beta-hydroxysteroid dehydrogenase [EC:1.1.1.146 1.1.1.-]
Npp.01A001810.1	putative RNA-binding protein Luc7-like 1 isoform X1	Putative RNA-binding protein Luc7-like 1	Putative RNA-binding protein Luc7-like 1	KOG0796: Spliceosome subunit	GO:0003729: mRNA binding; GO:0005685: U1 snRNP; GO:0006376: mRNA splice site selection	IPR004882: Luc7-related	-
Npp.01A001820.1	sister chromatid cohesion protein DCC1; hypothetical protein C2845_PM01G25930	Sister chromatid cohesion protein DCC1	Sister chromatid cohesion protein DCC1	KOG0798: Uncharacterized conserved protein	GO:0007064: mitotic sister chromatid cohesion; GO:0031390: Ctf18 RFC-like complex	IPR019128: Sister chromatid cohesion protein Dcc1	K11271: DSCC1,DCC1;sister chromatid cohesion protein DCC1
Npp.01A001830.1	probable ion channel CASTOR isoform X2	Probable ion channel CASTOR	Probable ion channel CASTOR	-	-	-	-
Npp.01A001840.1	LUC7 related protein	-	-	-	GO:0003729: mRNA binding; GO:0005685: U1 snRNP; GO:0006376: mRNA splice site selection	IPR004882: Luc7-related	-
Npp.01A001850.1	LUC7 related protein	-	-	KOG0796: Spliceosome subunit	GO:0003729: mRNA binding; GO:0005685: U1 snRNP; GO:0006376: mRNA splice site selection	IPR004882: Luc7-related	-
Npp.01A001860.1	30S ribosomal protein S6 alpha, chloroplastic	30S ribosomal protein S6 alpha, chloroplastic	30S ribosomal protein S6 alpha, chloroplastic	-	GO:0003735: structural constituent of ribosome; GO:0005840: ribosome; GO:0006412: translation; GO:0019843: rRNA binding	IPR000529: Ribosomal protein S6; IPR014717: Translation elongation factor EF1B/ribosomal protein S6; IPR020814: Ribosomal protein S6, plastid/chloroplast; IPR035980: Ribosomal protein S6 superfamily	K02990: RP-S6,MRPS6,rpsF;small subunit ribosomal protein S6
Npp.01A001870.1	uncharacterized protein LOC100191638	Desiccation protectant protein Lea14 homolog	Desiccation protectant protein Lea14 homolog	-	GO:0009269: response to desiccation	IPR004864: Late embryogenesis abundant protein, LEA_2 subgroup; IPR013990: Water stress and hypersensitive response domain	-
Npp.01A001880.1	glutathione S-transferase T3-like	-	-	-	-	-	-
Npp.01A001890.1	uncharacterized protein LOC8080166	-	-	-	GO:0015031: protein transport; GO:0030176: integral component of endoplasmic reticulum membrane	IPR004728: Translocation protein Sec62	-
Npp.01A001900.1	uncharacterized protein LOC8061642	-	-	-	-	IPR010298: Protein of unknown function DUF901	K06962: K06962;uncharacterized protein
Npp.01A001910.1	Ras-related protein RABA2a	Ras-related protein Rab-11A	Ras-related protein Rab-11A	-	GO:0003924: GTPase activity; GO:0005525: GTP binding	IPR001806: Small GTPase; IPR005225: Small GTP-binding protein domain; IPR027417: P-loop containing nucleoside triphosphate hydrolase	K07904: RAB11A;Ras-related protein Rab-11A
Npp.01A001920.1	11-beta-hydroxysteroid dehydrogenase-like 5	11-beta-hydroxysteroid dehydrogenase-like 5	11-beta-hydroxysteroid dehydrogenase-like 5	-	GO:0016491: oxidoreductase activity	IPR002347: Short-chain dehydrogenase/reductase SDR; IPR020904: Short-chain dehydrogenase/reductase, conserved site; IPR036291: NAD(P)-binding domain superfamily	K22418: HSD1;11beta/17beta-hydroxysteroid dehydrogenase [EC:1.1.1.146 1.1.1.-]
Npp.01A001930.1	uncharacterized protein LOC110437391 isoform X2	-	-	-	-	IPR015947: PUA-like superfamily	-
Npp.01A001940.1	diphthamide synthesis DPH2 family protein; 2-(3-amino-3-carboxypropyl)histidine synthase subunit 2	2-(3-amino-3-carboxypropyl)histidine synthase subunit 2	2-(3-amino-3-carboxypropyl)histidine synthase subunit 2	KOG2648: Diphthamide biosynthesis protein	GO:0017183: peptidyl-diphthamide biosynthetic process from peptidyl-histidine	IPR010014: Diphthamide synthesis DHP2; IPR016435: Diphthamide synthesis DPH1/DPH2; IPR042263: Diphthamide synthesis DPH1/DPH2, domain 1; IPR042265: Diphthamide synthesis DPH1/DPH2, domain 3	K17866: DPH2;diphthamide biosynthesis protein 2
Npp.01A001950.1	vacuolar protein sorting-associated protein 9A isoform X1	Vacuolar protein sorting-associated protein 9A; Rab5 GDP/GTP exchange factor	Vacuolar protein sorting-associated protein 9A; Rab5 GDP/GTP exchange factor	KOG2319: Vacuolar assembly/sorting protein VPS9	-	IPR003123: VPS9 domain; IPR037191: VPS9 domain superfamily; IPR041545: RABX5, catalytic core helical domain	K20131: RABGEF1;Rab5 GDP/GTP exchange factor
Npp.01A001960.1	uncharacterized protein LOC8080168; hypothetical protein ZEAMMB73_Zm00001d012867	-	-	-	-	-	-
Npp.01A001970.1	prolycopene isomerase 1, chloroplastic	All-trans-retinol 13,14-reductase; Phytoene desaturase (neurosporene-forming)	All-trans-retinol 13,14-reductase; Phytoene desaturase (neurosporene-forming)	KOG4254: Phytoene desaturase	GO:0016491: oxidoreductase activity; GO:0055114: oxidation-reduction process	IPR002937: Amine oxidase; IPR036188: FAD/NAD(P)-binding domain superfamily	-
Npp.01A001980.1	shaggy-related protein kinase kappa	Shaggy-related protein kinase kappa	Shaggy-related protein kinase kappa	KOG0658: Glycogen synthase kinase-3	GO:0004672: protein kinase activity; GO:0005524: ATP binding; GO:0006468: protein phosphorylation	IPR000719: Protein kinase domain; IPR011009: Protein kinase-like domain superfamily; IPR017441: Protein kinase, ATP binding site; IPR039192: Glycogen synthase kinase 3, catalytic domain	K03083: GSK3B;glycogen synthase kinase 3 beta [EC:2.7.11.26]
Npp.01A001990.1	prohibitin-1, mitochondrial	Prohibitin-1, mitochondrial	Prohibitin-1, mitochondrial	KOG3083: Prohibitin; KOG3090: Prohibitin-like protein	GO:0016020: membrane	IPR000163: Prohibitin; IPR001107: Band 7 domain; IPR036013: Band 7/SPFH domain superfamily	K17081: PHB2;prohibitin 2
Npp.01A002000.1	4-hydroxyphenylacetaldehyde oxime monooxygenase-like	Cytochrome P450 71B10	Cytochrome P450 71B10	-	GO:0005506: iron ion binding; GO:0016705: oxidoreductase activity, acting on paired donors, with incorporation or reduction of molecular oxygen; GO:0020037: heme binding; GO:0055114: oxidation-reduction process	IPR001128: Cytochrome P450; IPR036396: Cytochrome P450 superfamily	-
Npp.01A002010.1	phospholipase D delta-like	Phospholipase D delta	Phospholipase D delta	KOG1329: Phospholipase D1	GO:0004630: phospholipase D activity; GO:0005509: calcium ion binding; GO:0016020: membrane; GO:0046470: phosphatidylcholine metabolic process	IPR000008: C2 domain; IPR001736: Phospholipase D/Transphosphatidylase; IPR011402: Phospholipase D, plant; IPR015679: Phospholipase D family; IPR024632: Phospholipase D, C-terminal; IPR035892: C2 domain superfamily	K01115: PLD1_2;phospholipase D1/2 [EC:3.1.4.4]
Npp.01A002020.1	vacuolar protein sorting-associated protein 9A isoform X1	Vacuolar protein sorting-associated protein 9A; Rab5 GDP/GTP exchange factor	Vacuolar protein sorting-associated protein 9A; Rab5 GDP/GTP exchange factor	KOG2319: Vacuolar assembly/sorting protein VPS9	-	IPR003123: VPS9 domain; IPR037191: VPS9 domain superfamily; IPR041545: RABX5, catalytic core helical domain	K20131: RABGEF1;Rab5 GDP/GTP exchange factor
Npp.01A002030.1	uncharacterized protein LOC8080168; hypothetical protein ZEAMMB73_Zm00001d012867	-	-	-	-	-	-
Npp.01A002040.1	prolycopene isomerase 1, chloroplastic	All-trans-retinol 13,14-reductase; Phytoene desaturase (neurosporene-forming)	All-trans-retinol 13,14-reductase; Phytoene desaturase (neurosporene-forming)	KOG4254: Phytoene desaturase	GO:0016491: oxidoreductase activity; GO:0055114: oxidation-reduction process	IPR002937: Amine oxidase; IPR036188: FAD/NAD(P)-binding domain superfamily	-
Npp.01A002050.1	shaggy-related protein kinase kappa	Shaggy-related protein kinase kappa	Shaggy-related protein kinase kappa	KOG0658: Glycogen synthase kinase-3	GO:0004672: protein kinase activity; GO:0005524: ATP binding; GO:0006468: protein phosphorylation	IPR000719: Protein kinase domain; IPR008271: Serine/threonine-protein kinase, active site; IPR011009: Protein kinase-like domain superfamily; IPR017441: Protein kinase, ATP binding site; IPR039192: Glycogen synthase kinase 3, catalytic domain	K03083: GSK3B;glycogen synthase kinase 3 beta [EC:2.7.11.26]
Npp.01A002060.1	prohibitin-1, mitochondrial	Prohibitin-1, mitochondrial	Prohibitin-1, mitochondrial	KOG3083: Prohibitin; KOG3090: Prohibitin-like protein	GO:0016020: membrane	IPR000163: Prohibitin; IPR001107: Band 7 domain; IPR036013: Band 7/SPFH domain superfamily	K17081: PHB2;prohibitin 2
Npp.01A002070.1	4-hydroxyphenylacetaldehyde oxime monooxygenase-like; hypothetical protein SORBI_3001G018350	Cytochrome P450 71B10	Cytochrome P450 71B10	-	GO:0003677: DNA binding; GO:0005506: iron ion binding; GO:0006355: regulation of transcription, DNA-templated; GO:0016705: oxidoreductase activity, acting on paired donors, with incorporation or reduction of molecular oxygen; GO:0020037: heme binding; GO:0055114: oxidation-reduction process	IPR001128: Cytochrome P450; IPR002401: Cytochrome P450, E-class, group I; IPR003441: NAC domain; IPR036093: NAC domain superfamily; IPR036396: Cytochrome P450 superfamily	-
Npp.01A002080.1	phospholipase D delta-like	Phospholipase D delta	Phospholipase D delta	KOG1329: Phospholipase D1	GO:0004630: phospholipase D activity; GO:0005509: calcium ion binding; GO:0016020: membrane; GO:0046470: phosphatidylcholine metabolic process	IPR000008: C2 domain; IPR001736: Phospholipase D/Transphosphatidylase; IPR011402: Phospholipase D, plant; IPR015679: Phospholipase D family; IPR024632: Phospholipase D, C-terminal; IPR035892: C2 domain superfamily	K01115: PLD1_2;phospholipase D1/2 [EC:3.1.4.4]
Npp.01A002090.1	uncharacterized protein LOC103625728	-	-	-	GO:0005743: mitochondrial inner membrane; GO:0061617: MICOS complex	IPR007512: MICOS complex subunit Mic10	K17784: MINOS1,MOS1;mitochondrial inner membrane organizing system protein 1
Npp.01A002100.1	hypothetical protein SORBI_3001G018700	-	-	-	GO:0003677: DNA binding; GO:0006355: regulation of transcription, DNA-templated	IPR003441: NAC domain; IPR036093: NAC domain superfamily	-
Npp.01A002110.1	hypothetical protein TRIUR3_22423; uncharacterized protein LOC8079651	-	-	-	-	-	-
Npp.01A002120.1	40S ribosomal protein S4-1	40S ribosomal protein S4	40S ribosomal protein S4	KOG0378: 40S ribosomal protein S4	GO:0003735: structural constituent of ribosome; GO:0005840: ribosome; GO:0006412: translation	IPR000876: Ribosomal protein S4e; IPR013843: Ribosomal protein S4e, N-terminal; IPR018199: Ribosomal protein S4e, N-terminal, conserved site	-
Npp.01A002130.1	BTB/POZ domain-containing protein At2g13690	BTB/POZ domain-containing protein At2g13690	BTB/POZ domain-containing protein At2g13690	-	-	IPR038920: BTB/POZ domain-containing protein	-
Npp.01A002140.1	uncharacterized protein LOC8079653; hypothetical protein GQ55_9G016200	-	-	-	-	IPR011042: Six-bladed beta-propeller, TolB-like; IPR011659: WD40-like Beta Propeller	-
Npp.01A002150.1	uncharacterized protein C2845_PM02G42030	Receptor-like cytosolic serine/threonine-protein kinase RBK1	Receptor-like cytosolic serine/threonine-protein kinase RBK1	-	GO:0004672: protein kinase activity; GO:0005524: ATP binding; GO:0006468: protein phosphorylation	IPR000719: Protein kinase domain; IPR008271: Serine/threonine-protein kinase, active site; IPR011009: Protein kinase-like domain superfamily; IPR017441: Protein kinase, ATP binding site	-
Npp.01A002160.1	protein DETOXIFICATION 54	Protein DETOXIFICATION 54	Protein DETOXIFICATION 54	-	GO:0015297: antiporter activity; GO:0016020: membrane; GO:0042910: xenobiotic transmembrane transporter activity; GO:0055085: transmembrane transport	IPR002528: Multi antimicrobial extrusion protein	K03327: TC.MATE,SLC47A,norM,mdtK,dinF;multidrug resistance protein,MATE family
Npp.01A002170.1	ubiquinone biosynthesis monooxygenase COQ6, mitochondrial isoform X1	Ubiquinone biosynthesis monooxygenase COQ6, mitochondrial	Ubiquinone biosynthesis monooxygenase COQ6, mitochondrial	KOG3855: Monooxygenase involved in coenzyme Q (ubiquinone) biosynthesis	GO:0006744: ubiquinone biosynthetic process; GO:0016709: oxidoreductase activity, acting on paired donors, with incorporation or reduction of molecular oxygen, NAD(P)H as one donor, and incorporation of one atom of oxygen; GO:0055114: oxidation-reduction process; GO:0071949: FAD binding	IPR000689: Ubiquinone biosynthesis monooxygenase COQ6; IPR002938: FAD-binding domain; IPR010971: Ubiquinone biosynthesis hydroxylase UbiH/COQ6; IPR018168: Ubiquinone biosynthesis hydroxylase, UbiH/UbiF/VisC/COQ6, conserved site; IPR036188: FAD/NAD(P)-binding domain superfamily	K06126: COQ6;ubiquinone biosynthesis monooxygenase Coq6 [EC:1.14.13.-]
Npp.01A002180.1	E3 ubiquitin-protein ligase RNF170-like	E3 ubiquitin-protein ligase RNF170	E3 ubiquitin-protein ligase RNF170	-	-	IPR001841: Zinc finger, RING-type; IPR010652: Domain of unknown function DUF1232; IPR013083: Zinc finger, RING/FYVE/PHD-type; IPR017907: Zinc finger, RING-type, conserved site	K15707: RNF170;RING finger protein 170 [EC:2.3.2.27]
Npp.01A002190.1	uncharacterized protein LOC8080178; hypothetical protein BAE44_0002032	-	-	-	GO:0003690: double-stranded DNA binding; GO:0006355: regulation of transcription, DNA-templated	IPR003690: Transcription termination factor, mitochondrial/chloroplastic; IPR038538: MTERF superfamily, mitochondrial/chloroplastic	-
Npp.01A002200.1	hypothetical protein SORBI_3003G384500, partial	-	-	-	-	-	-
Npp.01A002220.1	cleavage and polyadenylation specificity factor subunit 2 isoform X1	Cleavage and polyadenylation specificity factor subunit 2; Integrator complex subunit 11	Cleavage and polyadenylation specificity factor subunit 2; Integrator complex subunit 11	KOG1135: mRNA cleavage and polyadenylation factor II complex, subunit CFT2 (CPSF subunit); KOG1136: Predicted cleavage and polyadenylation specificity factor (CPSF subunit); KOG1137: mRNA cleavage and polyadenylation factor II complex, BRR5 (CPSF subunit)	GO:0005847: mRNA cleavage and polyadenylation specificity factor complex; GO:0006378: mRNA polyadenylation; GO:0006379: mRNA cleavage	IPR001279: Metallo-beta-lactamase; IPR011108: Zn-dependent metallo-hydrolase, RNA specificity domain; IPR022712: Beta-Casp domain; IPR025069: Cleavage and polyadenylation specificity factor 2, C-terminal; IPR027075: Cleavage and polyadenylation specificity factor subunit 2; IPR035639: CPSF2, metallo-hydrolase domain; IPR036866: Ribonuclease Z/Hydroxyacylglutathione hydrolase-like	K14402: CPSF2,CFT2;cleavage and polyadenylation specificity factor subunit 2
Npp.01A002230.1	zinc finger protein STOP1 homolog	Zinc finger protein STOP1 homolog	Zinc finger protein STOP1 homolog	-	-	IPR013087: Zinc finger C2H2-type; IPR036236: Zinc finger C2H2 superfamily	-
Npp.01A002240.1	hypothetical protein SORBI_3008G181900	-	-	-	-	-	-
Npp.01A002250.1	ammonium transporter 3 member 2	Ammonium transporter 3 member 2; Ammonia channel	Ammonium transporter 3 member 2; Ammonia channel	KOG0682: Ammonia permease	GO:0005887: integral component of plasma membrane; GO:0008519: ammonium transmembrane transporter activity; GO:0016020: membrane; GO:0072488: ammonium transmembrane transport	IPR001905: Ammonium transporter; IPR002229: Blood group Rhesus C/E/D polypeptide; IPR024041: Ammonium transporter AmtB-like domain; IPR029020: Ammonium/urea transporter	K03320: amt,AMT,MEP;ammonium transporter,Amt family
Npp.01A002260.1	G-type lectin S-receptor-like serine/threonine-protein kinase At1g34300; hypothetical protein SORBI_3001G020500	G-type lectin S-receptor-like serine/threonine-protein kinase At1g34300	G-type lectin S-receptor-like serine/threonine-protein kinase At1g34300	-	GO:0004674: protein serine/threonine kinase activity; GO:0005524: ATP binding; GO:0006468: protein phosphorylation; GO:0048544: recognition of pollen	IPR000719: Protein kinase domain; IPR000858: S-locus glycoprotein domain; IPR001480: Bulb-type lectin domain; IPR003609: PAN/Apple domain; IPR008271: Serine/threonine-protein kinase, active site; IPR011009: Protein kinase-like domain superfamily; IPR017441: Protein kinase, ATP binding site; IPR024171: S-receptor-like serine/threonine-protein kinase; IPR036426: Bulb-type lectin domain superfamily	-
Npp.01A002270.1	uncharacterized protein LOC8079659; hypothetical protein ZEAMMB73_Zm00001d034779	-	-	-	-	IPR005031: Coenzyme Q-binding protein COQ10, START domain; IPR023393: START-like domain superfamily	-
Npp.01A002280.1	uncharacterized protein LOC8079660; hypothetical protein GQ55_9G017800	-	-	-	-	-	-
Npp.01A002300.1	glyceraldehyde-3-phosphate dehydrogenase B, chloroplastic	Glyceraldehyde-3-phosphate dehydrogenase B, chloroplastic (Fragment)	Glyceraldehyde-3-phosphate dehydrogenase B, chloroplastic (Fragment)	-	GO:0016620: oxidoreductase activity, acting on the aldehyde or oxo group of donors, NAD or NADP as acceptor; GO:0055114: oxidation-reduction process	IPR020828: Glyceraldehyde 3-phosphate dehydrogenase, NAD(P) binding domain; IPR036291: NAD(P)-binding domain superfamily	-
Npp.01A002310.1	hypothetical protein SORBI_3001G020900	-	-	-	-	IPR001623: DnaJ domain; IPR036869: Chaperone J-domain superfamily	-
Npp.01A002320.1	nicotinate phosphoribosyltransferase 1	Nicotinate phosphoribosyltransferase 2	Nicotinate phosphoribosyltransferase 2	KOG2511: Nicotinic acid phosphoribosyltransferase	GO:0004514: nicotinate-nucleotide diphosphorylase (carboxylating) activity; GO:0004516: nicotinate phosphoribosyltransferase activity; GO:0009435: NAD biosynthetic process	IPR006405: Nicotinate phosphoribosyltransferase pncB-type; IPR007229: Nicotinate phosphoribosyltransferase family; IPR013785: Aldolase-type TIM barrel; IPR036068: Nicotinate phosphoribosyltransferase-like, C-terminal; IPR040727: Nicotinate phosphoribosyltransferase, N-terminal domain; IPR041525: Nicotinate/nicotinamide phosphoribosyltransferase; IPR041619: Nicotinate phosphoribosyltransferase C-t…	K00763: pncB,NAPRT1;nicotinate phosphoribosyltransferase [EC:6.3.4.21]
Npp.01A002330.1	MDIS1-interacting receptor like kinase 2-like	Probable leucine-rich repeat receptor-like protein kinase At1g35710	Probable leucine-rich repeat receptor-like protein kinase At1g35710	-	GO:0004672: protein kinase activity; GO:0005515: protein binding; GO:0005524: ATP binding; GO:0006468: protein phosphorylation	IPR000719: Protein kinase domain; IPR001611: Leucine-rich repeat; IPR003591: Leucine-rich repeat, typical subtype; IPR008266: Tyrosine-protein kinase, active site; IPR011009: Protein kinase-like domain superfamily; IPR017441: Protein kinase, ATP binding site; IPR032675: Leucine-rich repeat domain superfamily	-
Npp.01A002340.1	elongation factor 2	Elongation factor 2	Elongation factor 2	KOG0467: Translation elongation factor 2/ribosome biogenesis protein RIA1 and related proteins; KOG0468: U5 snRNP-specific protein; KOG0469: Elongation factor 2	GO:0003924: GTPase activity; GO:0005525: GTP binding	IPR000640: Elongation factor EFG, domain V-like; IPR000795: Transcription factor, GTP-binding domain; IPR004161: Translation elongation factor EFTu-like, domain 2; IPR005225: Small GTP-binding protein domain; IPR005517: Translation elongation factor EFG/EF2, domain IV; IPR009000: Translation protein, beta-barrel domain superfamily; IPR014721: Ribosomal protein S5 domain 2-type fold, subgroup; IPR…	K03234: EEF2;elongation factor 2
Npp.01A002350.1	elongation factor 2	Elongation factor 2	Elongation factor 2	KOG0467: Translation elongation factor 2/ribosome biogenesis protein RIA1 and related proteins; KOG0468: U5 snRNP-specific protein; KOG0469: Elongation factor 2	GO:0003924: GTPase activity; GO:0005525: GTP binding	IPR000640: Elongation factor EFG, domain V-like; IPR000795: Transcription factor, GTP-binding domain; IPR004161: Translation elongation factor EFTu-like, domain 2; IPR005225: Small GTP-binding protein domain; IPR005517: Translation elongation factor EFG/EF2, domain IV; IPR009000: Translation protein, beta-barrel domain superfamily; IPR014721: Ribosomal protein S5 domain 2-type fold, subgroup; IPR…	K03234: EEF2;elongation factor 2
Npp.01A002360.1	LOW QUALITY PROTEIN: NADPH-dependent diflavin oxidoreductase 1	NADPH-dependent diflavin oxidoreductase 1	NADPH-dependent diflavin oxidoreductase 1	KOG0560: Sulfite reductase (ferredoxin); KOG1159: NADP-dependent flavoprotein reductase	GO:0010181: FMN binding; GO:0016491: oxidoreductase activity; GO:0055114: oxidation-reduction process	IPR001094: Flavodoxin-like; IPR001433: Oxidoreductase FAD/NAD(P)-binding; IPR001709: Flavoprotein pyridine nucleotide cytochrome reductase; IPR003097: Sulfite reductase [NADPH] flavoprotein alpha-component-like, FAD-binding; IPR008254: Flavodoxin/nitric oxide synthase; IPR017938: Riboflavin synthase-like beta-barrel; IPR023173: NADPH-cytochrome p450 reductase, FAD-binding, alpha-helical domain su…	-
Npp.01A002370.1	probable cellulose synthase A catalytic subunit 5	Probable cellulose synthase A catalytic subunit 5 [UDP-forming]	Probable cellulose synthase A catalytic subunit 5 [UDP-forming]	-	GO:0016020: membrane; GO:0016760: cellulose synthase (UDP-forming) activity; GO:0030244: cellulose biosynthetic process	IPR001841: Zinc finger, RING-type; IPR005150: Cellulose synthase; IPR013083: Zinc finger, RING/FYVE/PHD-type; IPR027934: Cellulose synthase, RING-type zinc finger; IPR029044: Nucleotide-diphospho-sugar transferases	K10999: CESA;cellulose synthase A [EC:2.4.1.12]
Npp.01A002390.1	disease resistance protein RGA2 isoform X1; hypothetical protein PAHAL_9G131300	Disease resistance protein RGA2	Disease resistance protein RGA2	-	GO:0043531: ADP binding	IPR002182: NB-ARC; IPR027417: P-loop containing nucleoside triphosphate hydrolase; IPR032675: Leucine-rich repeat domain superfamily; IPR038005: Virus X resistance protein-like, coiled-coil domain; IPR041118: Rx, N-terminal	-
Npp.01A002400.1	hydroquinone glucosyltransferase-like; hypothetical protein SETIT_1G021100v2	Hydroquinone glucosyltransferase	Hydroquinone glucosyltransferase	-	-	-	-
Npp.01A002410.1	IAA-amino acid hydrolase ILR1-like 3	IAA-amino acid hydrolase ILR1-like 3	IAA-amino acid hydrolase ILR1-like 3	-	GO:0016787: hydrolase activity	IPR002933: Peptidase M20; IPR011650: Peptidase M20, dimerisation domain; IPR017439: Amidohydrolase; IPR036264: Bacterial exopeptidase dimerisation domain	K14664: ILR1;IAA-amino acid hydrolase [EC:3.5.1.-]
Npp.01A002420.1	IAA-amino acid hydrolase ILR1-like 3; hypothetical protein SORBI_3001G022000	IAA-amino acid hydrolase ILR1-like 3	IAA-amino acid hydrolase ILR1-like 3	-	GO:0016787: hydrolase activity	IPR002933: Peptidase M20; IPR011650: Peptidase M20, dimerisation domain; IPR017439: Amidohydrolase; IPR036264: Bacterial exopeptidase dimerisation domain	-
Npp.01A002430.1	calreticulin-like	Calreticulin	Calreticulin	KOG0674: Calreticulin; KOG0675: Calnexin	GO:0005509: calcium ion binding; GO:0005783: endoplasmic reticulum; GO:0006457: protein folding; GO:0051082: unfolded protein binding	IPR001580: Calreticulin/calnexin; IPR009033: Calreticulin/calnexin, P domain superfamily; IPR009169: Calreticulin; IPR013320: Concanavalin A-like lectin/glucanase domain superfamily; IPR018124: Calreticulin/calnexin, conserved site	K08057: CALR;calreticulin
Npp.01A002440.1	acylpyruvase FAHD1, mitochondrial	Probable acylpyruvase FAHD2, mitochondrial; Uncharacterized protein PH0643	Probable acylpyruvase FAHD2, mitochondrial; Uncharacterized protein PH0643	KOG1535: Predicted fumarylacetoacetate hydralase	GO:0003824: catalytic activity	IPR011234: Fumarylacetoacetase-like, C-terminal; IPR036663: Fumarylacetoacetase-like, C-terminal domain superfamily	K01557: FAHD1;acylpyruvate hydrolase [EC:3.7.1.5]
Npp.01A002450.1	FACT complex subunit SPT16; hypothetical protein SORBI_3001G025000	FACT complex subunit SPT16	FACT complex subunit SPT16	KOG1189: Global transcriptional regulator, cell division control protein	GO:0035101: FACT complex	IPR000994: Peptidase M24; IPR011993: PH-like domain superfamily; IPR013719: Domain of unknown function DUF1747; IPR013953: FACT complex subunit Spt16 domain; IPR029148: FACT complex subunit Spt16, N-terminal lobe domain; IPR029149: Creatinase/Aminopeptidase P/Spt16, N-terminal; IPR033825: FACT complex subunit Spt16, peptidase M24-like domain; IPR036005: Creatinase/aminopeptidase-like; IPR040258: …	-
Npp.01A002460.1	uncharacterized protein LOC110433542; epoxide hydrolase 2	Epoxide hydrolase A	Epoxide hydrolase A	KOG4178: Soluble epoxide hydrolase	GO:0003824: catalytic activity	IPR000073: Alpha/beta hydrolase fold-1; IPR000639: Epoxide hydrolase-like; IPR029058: Alpha/Beta hydrolase fold	-
Npp.01A002470.1	Epoxide hydrolase A; uncharacterized protein LOC110433542	Epoxide hydrolase A	Epoxide hydrolase A	KOG4178: Soluble epoxide hydrolase	GO:0003824: catalytic activity	IPR000639: Epoxide hydrolase-like; IPR029058: Alpha/Beta hydrolase fold	-
Npp.01A002480.1	hypothetical protein TRIUR3_00178	Probable nucleolar protein 5-1	Probable nucleolar protein 5-1	-	-	IPR012974: NOP5, N-terminal	K14565: NOP58;nucleolar protein 58
Npp.01A002490.1	acylpyruvase FAHD1, mitochondrial	Probable acylpyruvase FAHD2, mitochondrial; Uncharacterized protein PH0643	Probable acylpyruvase FAHD2, mitochondrial; Uncharacterized protein PH0643	KOG1535: Predicted fumarylacetoacetate hydralase	GO:0003824: catalytic activity	IPR011234: Fumarylacetoacetase-like, C-terminal; IPR036663: Fumarylacetoacetase-like, C-terminal domain superfamily	K01557: FAHD1;acylpyruvate hydrolase [EC:3.7.1.5]
Npp.01A002500.1	calreticulin-like	Calreticulin	Calreticulin	KOG0674: Calreticulin; KOG0675: Calnexin	GO:0005509: calcium ion binding; GO:0005783: endoplasmic reticulum; GO:0006457: protein folding; GO:0051082: unfolded protein binding	IPR001580: Calreticulin/calnexin; IPR009033: Calreticulin/calnexin, P domain superfamily; IPR009169: Calreticulin; IPR013320: Concanavalin A-like lectin/glucanase domain superfamily; IPR018124: Calreticulin/calnexin, conserved site	K08057: CALR;calreticulin
Npp.01A002510.1	acylpyruvase FAHD1, mitochondrial	Probable acylpyruvase FAHD2, mitochondrial; Uncharacterized protein PH0643	Probable acylpyruvase FAHD2, mitochondrial; Uncharacterized protein PH0643	KOG1535: Predicted fumarylacetoacetate hydralase	GO:0003824: catalytic activity	IPR011234: Fumarylacetoacetase-like, C-terminal; IPR036663: Fumarylacetoacetase-like, C-terminal domain superfamily	K01557: FAHD1;acylpyruvate hydrolase [EC:3.7.1.5]
Npp.01A002520.1	calreticulin-like	Calreticulin	Calreticulin	KOG0674: Calreticulin; KOG0675: Calnexin	-	-	K08057: CALR;calreticulin
Npp.01A002530.1	probable protein phosphatase 2C 36	Probable protein phosphatase 2C 36	Probable protein phosphatase 2C 36	KOG0700: Protein phosphatase 2C/pyruvate dehydrogenase (lipoamide) phosphatase	GO:0004722: protein serine/threonine phosphatase activity; GO:0006470: protein dephosphorylation; GO:0043169: cation binding	IPR000222: PPM-type phosphatase, divalent cation binding; IPR001932: PPM-type phosphatase domain; IPR015655: Protein phosphatase 2C family; IPR036457: PPM-type phosphatase domain superfamily	K01102: PDP;pyruvate dehydrogenase phosphatase [EC:3.1.3.43]
Npp.01A002540.1	pentatricopeptide repeat-containing protein At1g11290, chloroplastic	Pentatricopeptide repeat-containing protein At1g11290, chloroplastic	Pentatricopeptide repeat-containing protein At1g11290, chloroplastic	-	GO:0005515: protein binding; GO:0008270: zinc ion binding	IPR002885: Pentatricopeptide repeat; IPR011990: Tetratricopeptide-like helical domain superfamily; IPR032867: DYW domain	-
Npp.01A002550.1	uncharacterized protein LOC8079680; hypothetical protein PAHAL_9G022700	-	-	-	-	IPR012340: Nucleic acid-binding, OB-fold; IPR035200: Cell division control protein 24, OB domain 2; IPR035201: Cell division control protein 24, OB domain 1; IPR035203: Cell division control protein 24, OB domain 3	-
Npp.01A002560.1	galactokinase	Galactokinase	Galactokinase	KOG0631: Galactokinase	GO:0004335: galactokinase activity; GO:0005524: ATP binding; GO:0005737: cytoplasm; GO:0006012: galactose metabolic process; GO:0046835: carbohydrate phosphorylation	IPR000705: Galactokinase; IPR006203: GHMP kinase, ATP-binding, conserved site; IPR006204: GHMP kinase N-terminal domain; IPR006206: Mevalonate/galactokinase; IPR013750: GHMP kinase, C-terminal domain; IPR014721: Ribosomal protein S5 domain 2-type fold, subgroup; IPR019539: Galactokinase, N-terminal domain; IPR019741: Galactokinase, conserved site; IPR020568: Ribosomal protein S5 domain 2-type fol…	K18674: GALK2;N-acetylgalactosamine kinase [EC:2.7.1.157]
Npp.01A002570.1	putative disease resistance RPP13-like protein 3 isoform X2; hypothetical protein GQ55_3G438000	Disease resistance protein RGA5	Disease resistance protein RGA5	-	GO:0043531: ADP binding	IPR002182: NB-ARC; IPR027417: P-loop containing nucleoside triphosphate hydrolase	-
Npp.01A002580.1	Glycerol-3-phosphate acyltransferase 1	Probable glycerol-3-phosphate acyltransferase 2	Probable glycerol-3-phosphate acyltransferase 2	-	GO:0016746: transferase activity, transferring acyl groups	IPR002123: Phospholipid/glycerol acyltransferase	K13508: GPAT;glycerol-3-phosphate acyltransferase [EC:2.3.1.15 2.3.1.198]
Npp.01A002590.1	uncharacterized protein LOC103625739	-	-	KOG0720: Molecular chaperone (DnaJ superfamily)	-	IPR001623: DnaJ domain; IPR018253: DnaJ domain, conserved site; IPR032843: Cleavage inducing molecular chaperone, Jiv; IPR036869: Chaperone J-domain superfamily	-
Npp.01A002600.1	short-chain dehydrogenase reductase 3b	Short-chain dehydrogenase reductase 5	Short-chain dehydrogenase reductase 5	KOG1199: Short-chain alcohol dehydrogenase/3-hydroxyacyl-CoA dehydrogenase	-	IPR002347: Short-chain dehydrogenase/reductase SDR; IPR036291: NAD(P)-binding domain superfamily	-
Npp.01A002610.1	tRNA:m(4)X modification enzyme TRM13 homolog; hypothetical protein	tRNA:m(4)X modification enzyme TRM13	tRNA:m(4)X modification enzyme TRM13	KOG2811: Uncharacterized conserved protein	GO:0030488: tRNA methylation; GO:0106050: tRNA 2'-O-methyltransferase activity	IPR007871: Methyltransferase TRM13; IPR021721: Zinc finger, CCCH-type, TRM13; IPR022776: TRM13/UPF0224 family, U11-48K-like CHHC zinc finger domain; IPR039044: tRNA:m(4)X modification enzyme Trm13	K15446: TRM13,CCDC76;tRNA:m4X modification enzyme [EC:2.1.1.225]
Npp.01A002620.1	squamosa promoter-binding-like protein 6	Squamosa promoter-binding-like protein 6	Squamosa promoter-binding-like protein 6	-	GO:0003677: DNA binding; GO:0005515: protein binding; GO:0005634: nucleus; GO:0042025: host cell nucleus	IPR002110: Ankyrin repeat; IPR004333: SBP domain; IPR020683: Ankyrin repeat-containing domain; IPR036770: Ankyrin repeat-containing domain superfamily; IPR036893: SBP domain superfamily	-
Npp.01A002630.1	uncharacterized protein LOC100274879 isoform X1	-	-	-	-	IPR012946: X8 domain	-
Npp.01A002640.1	probable polygalacturonase	Probable polygalacturonase	Probable polygalacturonase	-	GO:0004650: polygalacturonase activity; GO:0005975: carbohydrate metabolic process	IPR000743: Glycoside hydrolase, family 28; IPR006626: Parallel beta-helix repeat; IPR011050: Pectin lyase fold/virulence factor; IPR012334: Pectin lyase fold	-
Npp.01A002650.1	putative cytidine/deoxycytidylate deaminase family protein; uncharacterized protein LOC8079687 isoform X2	Guanosine deaminase	Guanosine deaminase	KOG1018: Cytosine deaminase FCY1 and related enzymes	GO:0008270: zinc ion binding; GO:0016787: hydrolase activity	IPR002125: Cytidine and deoxycytidylate deaminase domain; IPR016192: APOBEC/CMP deaminase, zinc-binding; IPR016193: Cytidine deaminase-like	-
Npp.01A002660.1	RecName: Full=Flap endonuclease 1-B; Short=FEN-1-B; AltName: Full=Flap structure-specific endonuclease 1-B &gt;EER90588.3 hypothetical protein SORBI_3001G027100; flap endonuclease 1-B isoform X1	Flap endonuclease 1-B	Flap endonuclease 1-B	KOG2518: 5'-3' exonuclease; KOG2519: 5'-3' exonuclease	GO:0003677: DNA binding; GO:0004518: nuclease activity	IPR006084: XPG/Rad2 endonuclease; IPR006085: XPG N-terminal; IPR006086: XPG-I domain; IPR008918: Helix-hairpin-helix motif, class 2; IPR019974: XPG conserved site; IPR023426: Flap endonuclease 1; IPR029060: PIN-like domain superfamily; IPR036279: 5'-3' exonuclease, C-terminal domain superfamily	K04799: FEN1,RAD2;flap endonuclease-1 [EC:3.-.-.-]
Npp.01A002670.1	uncharacterized protein LOC8079688 isoform X2	-	-	KOG3109: Haloacid dehalogenase-like hydrolase	GO:0016787: hydrolase activity	IPR006439: HAD hydrolase, subfamily IA; IPR010237: Pyrimidine 5-nucleotidase; IPR036412: HAD-like superfamily	K18551: SDT1;pyrimidine and pyridine-specific 5'-nucleotidase [EC:3.1.3.-]
Npp.01A002680.1	50S ribosomal protein L18, chloroplastic	50S ribosomal protein L18, chloroplastic	50S ribosomal protein L18, chloroplastic	-	GO:0003735: structural constituent of ribosome; GO:0005840: ribosome; GO:0006412: translation	IPR004389: Ribosomal protein L18, bacterial-type; IPR005484: Ribosomal protein L18	K02881: RP-L18,MRPL18,rplR;large subunit ribosomal protein L18
Npp.01A002690.1	mannan endo-1,4-beta-mannosidase 3; hypothetical protein SORBI_3001G027800	Mannan endo-1,4-beta-mannosidase 3	Mannan endo-1,4-beta-mannosidase 3	-	GO:0004553: hydrolase activity, hydrolyzing O-glycosyl compounds; GO:0005975: carbohydrate metabolic process	IPR001547: Glycoside hydrolase, family 5; IPR017853: Glycoside hydrolase superfamily; IPR018087: Glycoside hydrolase, family 5, conserved site	K19355: MAN;mannan endo-1,4-beta-mannosidase [EC:3.2.1.78]
Npp.01A002700.1	cation/H(+) antiporter 19; hypothetical protein C2845_PM01G24980	Cation/H(+) antiporter 19	Cation/H(+) antiporter 19	KOG1650: Predicted K+/H+-antiporter	GO:0006812: cation transport; GO:0015299: solute:proton antiporter activity; GO:0016021: integral component of membrane; GO:0055085: transmembrane transport	IPR006153: Cation/H+ exchanger; IPR038770: Sodium/solute symporter superfamily	-
Npp.01A002710.1	scarecrow-like protein 34	Scarecrow-like protein 14; Protein SCARECROW	Scarecrow-like protein 14; Protein SCARECROW	-	-	IPR005202: Transcription factor GRAS	-
Npp.01A002720.1	scarecrow-like protein 34; hypothetical protein SORBI_3005G229400	Scarecrow-like protein 34	Scarecrow-like protein 34	-	-	IPR005202: Transcription factor GRAS	-
Npp.01A002730.1	DEAD-box ATP-dependent RNA helicase 3A, chloroplastic	DEAD-box ATP-dependent RNA helicase 3A, chloroplastic	DEAD-box ATP-dependent RNA helicase 3A, chloroplastic	KOG0331: ATP-dependent RNA helicase	GO:0003723: RNA binding; GO:0004386: helicase activity; GO:0005524: ATP binding; GO:0005634: nucleus; GO:0008270: zinc ion binding	IPR001650: Helicase, C-terminal; IPR001878: Zinc finger, CCHC-type; IPR011545: DEAD/DEAH box helicase domain; IPR012562: GUCT; IPR014001: Helicase superfamily 1/2, ATP-binding domain; IPR014014: RNA helicase, DEAD-box type, Q motif; IPR027417: P-loop containing nucleoside triphosphate hydrolase; IPR036875: Zinc finger, CCHC-type superfamily	K16911: DDX21;ATP-dependent RNA helicase DDX21 [EC:3.6.4.13]
Npp.01A002740.1	-	-	-	KOG0951: RNA helicase BRR2, DEAD-box superfamily; KOG4434: Molecular chaperone SEC63, endoplasmic reticulum translocon component	-	IPR004179: Sec63 domain; IPR014756: Immunoglobulin E-set; IPR035892: C2 domain superfamily	-
Npp.01A002750.1	DExH-box ATP-dependent RNA helicase DExH12	Activating signal cointegrator 1 complex subunit 3-like	Activating signal cointegrator 1 complex subunit 3-like	KOG0951: RNA helicase BRR2, DEAD-box superfamily; KOG0952: DNA/RNA helicase MER3/SLH1, DEAD-box superfamily	-	-	-
Npp.01A002760.1	-	-	-	KOG0951: RNA helicase BRR2, DEAD-box superfamily; KOG0952: DNA/RNA helicase MER3/SLH1, DEAD-box superfamily	GO:0003676: nucleic acid binding; GO:0005524: ATP binding	IPR004179: Sec63 domain; IPR011545: DEAD/DEAH box helicase domain; IPR014001: Helicase superfamily 1/2, ATP-binding domain; IPR027417: P-loop containing nucleoside triphosphate hydrolase; IPR035892: C2 domain superfamily	-
Npp.01A002770.1	-	-	-	KOG0951: RNA helicase BRR2, DEAD-box superfamily; KOG0952: DNA/RNA helicase MER3/SLH1, DEAD-box superfamily	-	IPR004179: Sec63 domain	-
Npp.01A002780.1	DExH-box ATP-dependent RNA helicase DExH12	Activating signal cointegrator 1 complex subunit 3-like; Putative U5 small nuclear ribonucleoprotein 200 kDa helicase	Activating signal cointegrator 1 complex subunit 3-like; Putative U5 small nuclear ribonucleoprotein 200 kDa helicase	KOG0951: RNA helicase BRR2, DEAD-box superfamily; KOG0952: DNA/RNA helicase MER3/SLH1, DEAD-box superfamily	GO:0003676: nucleic acid binding; GO:0005524: ATP binding	IPR003593: AAA+ ATPase domain; IPR011545: DEAD/DEAH box helicase domain; IPR014001: Helicase superfamily 1/2, ATP-binding domain; IPR027417: P-loop containing nucleoside triphosphate hydrolase; IPR041094: Brr2, N-terminal helicase PWI domain	-
Npp.01A002790.1	transmembrane protein 184A	Transmembrane protein 184A	Transmembrane protein 184A	KOG2641: Predicted seven transmembrane receptor - rhodopsin family	-	IPR005178: Organic solute transporter subunit alpha/Transmembrane protein 184	-
Npp.01A002800.1	SPX domain-containing protein 4	SPX domain-containing protein 4	SPX domain-containing protein 4	-	GO:0016036: cellular response to phosphate starvation	IPR004331: SPX domain; IPR031142: SPX domain-containing protein	-
Npp.01A002810.1	hypothetical protein C2845_PM02G42670; uncharacterized protein LOC8080213	-	-	-	-	-	-
Npp.01A002820.1	protein N-terminal and lysine N-methyltransferase EFM7	-	-	-	-	IPR019410: Lysine methyltransferase; IPR029063: S-adenosyl-L-methionine-dependent methyltransferase	-
Npp.01A002830.1	putative protein phosphatase 2C 24	Putative protein phosphatase 2C 24	Putative protein phosphatase 2C 24	KOG1379: Serine/threonine protein phosphatase	GO:0003824: catalytic activity	IPR001932: PPM-type phosphatase domain; IPR036457: PPM-type phosphatase domain superfamily; IPR039123: Protein phosphatase 2C	K17508: PTC7,PPTC7;protein phosphatase PTC7 [EC:3.1.3.16]
Npp.01A002840.1	uncharacterized protein LOC8079700	-	-	-	GO:0006729: tetrahydrobiopterin biosynthetic process; GO:0008124: 4-alpha-hydroxytetrahydrobiopterin dehydratase activity	IPR001533: Pterin 4 alpha carbinolamine dehydratase; IPR036428: Pterin 4 alpha carbinolamine dehydratase superfamily	K01724: PCBD,phhB;4a-hydroxytetrahydrobiopterin dehydratase [EC:4.2.1.96]
Npp.01A002850.1	non-specific phospholipase C1	Non-specific phospholipase C1	Non-specific phospholipase C1	-	GO:0016788: hydrolase activity, acting on ester bonds	IPR007312: Phosphoesterase; IPR017850: Alkaline-phosphatase-like, core domain superfamily	K01114: plc;phospholipase C [EC:3.1.4.3]
Npp.01A002860.1	anthranilate synthase alpha subunit 1, chloroplastic	Anthranilate synthase alpha subunit 1, chloroplastic	Anthranilate synthase alpha subunit 1, chloroplastic	KOG1223: Isochorismate synthase; KOG1224: Para-aminobenzoate (PABA) synthase ABZ1	GO:0000162: tryptophan biosynthetic process; GO:0004049: anthranilate synthase activity	IPR005256: Anthranilate synthase component I, PabB-like; IPR005801: ADC synthase; IPR006805: Anthranilate synthase component I, N-terminal; IPR015890: Chorismate-utilising enzyme, C-terminal; IPR019999: Anthranilate synthase component I-like	K01657: trpE;anthranilate synthase component I [EC:4.1.3.27]
Npp.01A002870.1	uncharacterized protein LOC103644279	-	-	-	-	IPR032675: Leucine-rich repeat domain superfamily	-
Npp.01A002890.1	uncharacterized protein LOC103644279; hypothetical protein ZEAMMB73_Zm00001d034711	-	-	-	-	IPR032675: Leucine-rich repeat domain superfamily	-
Npp.01A002900.1	zinc finger CCCH domain-containing protein 25	RNA-binding motif protein, X-linked 2	RNA-binding motif protein, X-linked 2	KOG0126: Predicted RNA-binding protein (RRM superfamily)	GO:0003676: nucleic acid binding; GO:0046872: metal ion binding	IPR000504: RNA recognition motif domain; IPR000571: Zinc finger, CCCH-type; IPR012677: Nucleotide-binding alpha-beta plait domain superfamily; IPR035979: RNA-binding domain superfamily; IPR036855: Zinc finger, CCCH-type superfamily	K13107: RBMX2,IST3;RNA-binding motif protein,X-linked 2
Npp.01A002910.1	GDP-mannose transporter GONST1; hypothetical protein GQ55_9G025000	GDP-mannose transporter GONST2	GDP-mannose transporter GONST2	-	-	-	K15356: VRG4,GONST1;GDP-mannose transporter
Npp.01A002920.1	hypothetical protein PAHAL_9G026400; uncharacterized protein LOC8080219	-	-	-	-	-	-
Npp.01A002930.1	uncharacterized protein LOC8079703 isoform X5; hypothetical protein SORBI_3001G029800	-	-	-	-	-	-
Npp.01A002940.1	calmodulin-binding receptor-like cytoplasmic kinase 2 isoform X1	Calmodulin-binding receptor-like cytoplasmic kinase 1	Calmodulin-binding receptor-like cytoplasmic kinase 1	-	GO:0004672: protein kinase activity; GO:0005524: ATP binding; GO:0006468: protein phosphorylation	IPR000719: Protein kinase domain; IPR001245: Serine-threonine/tyrosine-protein kinase, catalytic domain; IPR011009: Protein kinase-like domain superfamily	-
Npp.01A002950.1	protein DEFECTIVE IN EXINE FORMATION 1	-	-	-	GO:0005515: protein binding	IPR013517: FG-GAP repeat; IPR015943: WD40/YVTN repeat-like-containing domain superfamily	-
Npp.01A002960.1	uncharacterized protein LOC8080221	-	-	-	GO:0009639: response to red or far red light; GO:0009959: negative gravitropism	IPR006943: Domain of unknown function DUF641, plant; IPR040225: Protein gravitropic in the light 1-like	-
Npp.01A002970.1	uncharacterized protein LOC8079705	Transcription termination/antitermination protein NusG	Transcription termination/antitermination protein NusG	-	GO:0006355: regulation of transcription, DNA-templated	IPR005824: KOW; IPR006645: NusG, N-terminal; IPR008991: Translation protein SH3-like domain superfamily; IPR014722: Ribosomal protein L2, domain 2; IPR036735: NusG, N-terminal domain superfamily; IPR043425: NusG-like	-
Npp.01A002980.1	probable serine/threonine-protein kinase BSK3	Serine/threonine-protein kinase BSK5	Serine/threonine-protein kinase BSK5	-	GO:0004672: protein kinase activity; GO:0005515: protein binding; GO:0005524: ATP binding; GO:0006468: protein phosphorylation	IPR000719: Protein kinase domain; IPR001245: Serine-threonine/tyrosine-protein kinase, catalytic domain; IPR011009: Protein kinase-like domain superfamily; IPR011990: Tetratricopeptide-like helical domain superfamily	-
Npp.01A002990.1	DIMBOA UDP-glucosyltransferase BX8	DIMBOA UDP-glucosyltransferase BX8	DIMBOA UDP-glucosyltransferase BX8	-	GO:0008194: UDP-glycosyltransferase activity	IPR002213: UDP-glucuronosyl/UDP-glucosyltransferase	-
Npp.01A003000.1	DIMBOA UDP-glucosyltransferase BX8	DIMBOA UDP-glucosyltransferase BX9	DIMBOA UDP-glucosyltransferase BX9	-	GO:0008194: UDP-glycosyltransferase activity	IPR002213: UDP-glucuronosyl/UDP-glucosyltransferase	-
Npp.01A003010.1	hypothetical protein SORBI_3001G031000; Putative NAC domain transcription factor superfamily protein	-	-	-	-	-	-
Npp.01A003020.1	DIMBOA UDP-glucosyltransferase BX8	DIMBOA UDP-glucosyltransferase BX8	DIMBOA UDP-glucosyltransferase BX8	-	-	-	-
Npp.01A003030.1	hypothetical protein SORBI_3001G030800	-	-	-	GO:0003677: DNA binding; GO:0006355: regulation of transcription, DNA-templated	IPR003441: NAC domain; IPR036093: NAC domain superfamily	-
Npp.01A003040.1	dolichol-phosphate mannosyltransferase subunit 1	Dolichol-phosphate mannosyltransferase subunit 1	Dolichol-phosphate mannosyltransferase subunit 1	KOG2977: Glycosyltransferase; KOG2978: Dolichol-phosphate mannosyltransferase	GO:0004582: dolichyl-phosphate beta-D-mannosyltransferase activity	IPR001173: Glycosyltransferase 2-like; IPR029044: Nucleotide-diphospho-sugar transferases; IPR039528: DPM1-like	K00721: DPM1;dolichol-phosphate mannosyltransferase [EC:2.4.1.83]
Npp.01A003050.1	hemK methyltransferase family member 2	Methyltransferase N6AMT1	Methyltransferase N6AMT1	KOG3191: Predicted N6-DNA-methyltransferase	GO:0003676: nucleic acid binding; GO:0008168: methyltransferase activity; GO:0032259: methylation	IPR002052: DNA methylase, N-6 adenine-specific, conserved site; IPR007848: Methyltransferase small domain; IPR029063: S-adenosyl-L-methionine-dependent methyltransferase	K19589: N6AMT1;release factor glutamine methyltransferase [EC:2.1.1.297]
Npp.01A003060.1	pentatricopeptide repeat-containing protein At1g74850, chloroplastic	Pentatricopeptide repeat-containing protein At1g74850, chloroplastic	Pentatricopeptide repeat-containing protein At1g74850, chloroplastic	-	GO:0005515: protein binding	IPR002625: Smr domain; IPR002885: Pentatricopeptide repeat; IPR011990: Tetratricopeptide-like helical domain superfamily; IPR033443: Pentacotripeptide-repeat region of PRORP	-
Npp.01A003070.1	mitotic-spindle organizing protein 1B	Mitotic-spindle organizing protein 1B	Mitotic-spindle organizing protein 1B	-	GO:0008274: gamma-tubulin ring complex; GO:0033566: gamma-tubulin complex localization	IPR022214: Mitotic-spindle organizing protein 1	K18633: MZT1,GIP1,GIP2;mitotic-spindle organizing protein 1
Npp.01A003080.1	calmodulin-binding protein 60 A isoform X1	Calmodulin-binding protein 60 B	Calmodulin-binding protein 60 B	-	GO:0005516: calmodulin binding	IPR012416: CALMODULIN-BINDING PROTEIN60	-
Npp.01A003090.1	nucleobase-ascorbate transporter 6	Nucleobase-ascorbate transporter 6; Solute carrier family 23 member 2	Nucleobase-ascorbate transporter 6; Solute carrier family 23 member 2	KOG1292: Xanthine/uracil transporters	GO:0016020: membrane; GO:0022857: transmembrane transporter activity; GO:0055085: transmembrane transport	IPR006043: Xanthine/uracil/vitamin C permease	-
Npp.01A003100.1	uncharacterized protein LOC8079713	-	-	-	GO:0003735: structural constituent of ribosome; GO:0006412: translation; GO:0015934: large ribosomal subunit	IPR005996: Ribosomal protein L30, bacterial-type; IPR016082: Ribosomal protein L30, ferredoxin-like fold domain; IPR036919: Ribosomal protein L30, ferredoxin-like fold domain superfamily	K02907: RP-L30,MRPL30,rpmD;large subunit ribosomal protein L30
Npp.01A003110.1	ras-related protein Rab11C	Ras-related protein Rab11C	Ras-related protein Rab11C	-	GO:0003924: GTPase activity; GO:0005525: GTP binding	IPR001806: Small GTPase; IPR005225: Small GTP-binding protein domain; IPR027417: P-loop containing nucleoside triphosphate hydrolase	K07904: RAB11A;Ras-related protein Rab-11A
Npp.01A003120.1	protein NRT1/ PTR FAMILY 5.6	Protein NRT1/ PTR FAMILY 5.6	Protein NRT1/ PTR FAMILY 5.6	-	GO:0006857: oligopeptide transport; GO:0016020: membrane; GO:0022857: transmembrane transporter activity; GO:0055085: transmembrane transport	IPR000109: Proton-dependent oligopeptide transporter family; IPR018456: PTR2 family proton/oligopeptide symporter, conserved site; IPR036259: MFS transporter superfamily	-
Npp.01A003130.1	uncharacterized protein LOC103651381 isoform X1	-	-	-	-	IPR024752: Myb/SANT-like domain	-
Npp.01A003140.1	hypothetical protein ZEAMMB73_Zm00001d043416	-	-	-	-	IPR009027: Ribosomal protein L9/RNase H1, N-terminal; IPR011320: Ribonuclease H1, N-terminal; IPR037056: Ribonuclease H1, N-terminal domain superfamily	-
Npp.01A003150.1	Bowman-Birk type trypsin inhibitor isoform X2	-	-	-	GO:0004867: serine-type endopeptidase inhibitor activity; GO:0005576: extracellular region	IPR000877: Proteinase inhibitor I12, Bowman-Birk; IPR035995: Bowman-Birk type proteinase inhibitor	-
Npp.01A003160.1	D-xylose-proton symporter-like 3 chloroplastic	Polyol transporter 5; D-xylose-proton symporter-like 3, chloroplastic	Polyol transporter 5; D-xylose-proton symporter-like 3, chloroplastic	-	GO:0016020: membrane; GO:0016021: integral component of membrane; GO:0022857: transmembrane transporter activity; GO:0055085: transmembrane transport	IPR003663: Sugar/inositol transporter; IPR005828: Major facilitator, sugar transporter-like; IPR005829: Sugar transporter, conserved site; IPR020846: Major facilitator superfamily domain; IPR036259: MFS transporter superfamily	-
Npp.01A003170.1	uncharacterized protein LOC110436290; hypothetical protein BAE44_0011034	-	-	-	-	IPR025558: Domain of unknown function DUF4283; IPR025836: Zinc knuckle CX2CX4HX4C; IPR040256: Uncharacterized protein At4g02000-like	-
Npp.01A003180.1	L-type lectin-domain containing receptor kinase IV.1; hypothetical protein SORBI_3001G032300	L-type lectin-domain containing receptor kinase IV.1	L-type lectin-domain containing receptor kinase IV.1	-	GO:0004672: protein kinase activity; GO:0005524: ATP binding; GO:0006468: protein phosphorylation; GO:0030246: carbohydrate binding	IPR000719: Protein kinase domain; IPR001220: Legume lectin domain; IPR008271: Serine/threonine-protein kinase, active site; IPR011009: Protein kinase-like domain superfamily; IPR013320: Concanavalin A-like lectin/glucanase domain superfamily; IPR017441: Protein kinase, ATP binding site	-
Npp.01A003190.1	glutathione S-transferase T3	-	-	-	-	IPR029466: No apical meristem-associated, C-terminal domain	-
Npp.01A003200.1	uncharacterized protein LOC8155651	-	-	-	GO:0016788: hydrolase activity, acting on ester bonds	IPR006912: Harbinger transposase-derived protein	-
Npp.01A003210.1	lectin-like receptor kinase 7; hypothetical protein GQ55_9G028100	L-type lectin-domain containing receptor kinase IV.1	L-type lectin-domain containing receptor kinase IV.1	-	GO:0004672: protein kinase activity; GO:0005524: ATP binding; GO:0006468: protein phosphorylation; GO:0030246: carbohydrate binding	IPR000719: Protein kinase domain; IPR001220: Legume lectin domain; IPR008271: Serine/threonine-protein kinase, active site; IPR011009: Protein kinase-like domain superfamily; IPR013320: Concanavalin A-like lectin/glucanase domain superfamily; IPR017441: Protein kinase, ATP binding site	-
Npp.01A003220.1	uncharacterized protein LOC8057039 isoform X1	-	-	-	GO:0003677: DNA binding; GO:0046983: protein dimerization activity	IPR003656: Zinc finger, BED-type; IPR007021: Domain of unknown function DUF659; IPR008906: HAT, C-terminal dimerisation domain; IPR012337: Ribonuclease H-like superfamily	-
Npp.01A003230.1	uncharacterized protein LOC8057363	-	-	-	GO:0003690: double-stranded DNA binding; GO:0006355: regulation of transcription, DNA-templated	IPR003690: Transcription termination factor, mitochondrial/chloroplastic; IPR038538: MTERF superfamily, mitochondrial/chloroplastic	-
Npp.01A003240.1	hypothetical protein SORBI_3001G034000; uncharacterized protein LOC8079699 isoform X1	-	-	-	GO:0003690: double-stranded DNA binding; GO:0006355: regulation of transcription, DNA-templated	IPR003690: Transcription termination factor, mitochondrial/chloroplastic; IPR038538: MTERF superfamily, mitochondrial/chloroplastic	K15032: MTERFD;mTERF domain-containing protein,mitochondrial
Npp.01A003250.1	protein NRT1/ PTR FAMILY 5.6	Protein NRT1/ PTR FAMILY 5.6	Protein NRT1/ PTR FAMILY 5.6	-	GO:0006857: oligopeptide transport; GO:0016020: membrane; GO:0022857: transmembrane transporter activity; GO:0055085: transmembrane transport	IPR000109: Proton-dependent oligopeptide transporter family; IPR018456: PTR2 family proton/oligopeptide symporter, conserved site; IPR036259: MFS transporter superfamily	-
Npp.01A003260.1	uncharacterized protein LOC103651381 isoform X1	-	-	-	-	-	-
Npp.01A003270.1	hypothetical protein ZEAMMB73_Zm00001d043416	-	-	-	-	IPR009027: Ribosomal protein L9/RNase H1, N-terminal; IPR011320: Ribonuclease H1, N-terminal; IPR037056: Ribonuclease H1, N-terminal domain superfamily	-
Npp.01A003280.1	IAA-amino acid hydrolase ILR1-like 3	IAA-amino acid hydrolase ILR1-like 3	IAA-amino acid hydrolase ILR1-like 3	-	GO:0016787: hydrolase activity	IPR002933: Peptidase M20; IPR011650: Peptidase M20, dimerisation domain; IPR017439: Amidohydrolase; IPR036264: Bacterial exopeptidase dimerisation domain	K14664: ILR1;IAA-amino acid hydrolase [EC:3.5.1.-]
Npp.01A003290.1	IAA-amino acid hydrolase ILR1-like 3; hypothetical protein SORBI_3001G022000	IAA-amino acid hydrolase ILR1-like 3	IAA-amino acid hydrolase ILR1-like 3	-	GO:0016787: hydrolase activity	IPR002933: Peptidase M20; IPR011650: Peptidase M20, dimerisation domain; IPR017439: Amidohydrolase; IPR036264: Bacterial exopeptidase dimerisation domain	-
Npp.01A003300.1	NDR1/HIN1-like protein 3	-	-	-	-	-	-
Npp.01A003310.1	NDR1/HIN1-like protein 10	-	-	-	-	IPR004864: Late embryogenesis abundant protein, LEA_2 subgroup	-
Npp.01A003320.1	uncharacterized protein LOC8080191	-	-	-	-	IPR004864: Late embryogenesis abundant protein, LEA_2 subgroup	-
Npp.01A003330.1	CASP-like protein 4B3	CASP-like protein 4B3	CASP-like protein 4B3	-	-	IPR006702: Casparian strip membrane protein domain	-
Npp.01A003340.1	SCAR-like protein 1 isoform X1	SCAR-like protein 1	SCAR-like protein 1	-	GO:0003779: actin binding; GO:0005856: cytoskeleton; GO:0030036: actin cytoskeleton organization	IPR003124: WH2 domain; IPR028288: SCAR/WAVE family	-
Npp.01A003350.1	protein LURP-one-related 15; hypothetical protein SHCRBa_063_N24_R_80	Protein LURP-one-related 15	Protein LURP-one-related 15	-	-	IPR007612: LURP-one-related; IPR025659: Tubby-like, C-terminal; IPR038595: LURP-one-related superfamily	-
Npp.01A003360.1	protein LURP-one-related 15; hypothetical protein OsI_14067	Protein LURP-one-related 15	Protein LURP-one-related 15	-	-	IPR007612: LURP-one-related; IPR025659: Tubby-like, C-terminal; IPR038595: LURP-one-related superfamily	-
Npp.01A003370.1	hypothetical protein SORBI_3001G039100; uncharacterized protein LOC8057069	Alpha-ketoglutarate-dependent dioxygenase AlkB; Nucleic acid dioxygenase ALKBH1	Alpha-ketoglutarate-dependent dioxygenase AlkB; Nucleic acid dioxygenase ALKBH1	KOG2731: DNA alkylation damage repair protein	GO:0055114: oxidation-reduction process	IPR004574: Alkylated DNA repair protein AlkB; IPR027450: Alpha-ketoglutarate-dependent dioxygenase AlkB-like; IPR037151: Alpha-ketoglutarate-dependent dioxygenase AlkB-like superfamily	-
Npp.01A003380.1	uncharacterized protein LOC8057387	Probable GTP-binding protein EngB	Probable GTP-binding protein EngB	KOG2486: Predicted GTPase	GO:0005525: GTP binding	IPR005225: Small GTP-binding protein domain; IPR006073: GTP binding domain; IPR019987: GTP-binding protein, ribosome biogenesis, YsxC; IPR027417: P-loop containing nucleoside triphosphate hydrolase; IPR030393: EngB-type guanine nucleotide-binding (G) domain	-
Npp.01A003390.1	40S ribosomal protein S26	40S ribosomal protein S26	40S ribosomal protein S26	KOG1768: 40s ribosomal protein S26	GO:0003735: structural constituent of ribosome; GO:0005840: ribosome; GO:0006412: translation	IPR000892: Ribosomal protein S26e; IPR038551: Ribosomal protein S26e superfamily	K02976: RP-S26e,RPS26;small subunit ribosomal protein S26e
Npp.01A003400.1	serine/threonine-protein kinase HT1	Serine/threonine-protein kinase STY13; Mitogen-activated protein kinase kinase kinase	Serine/threonine-protein kinase STY13; Mitogen-activated protein kinase kinase kinase	-	GO:0004672: protein kinase activity; GO:0005524: ATP binding; GO:0006468: protein phosphorylation	IPR000719: Protein kinase domain; IPR001245: Serine-threonine/tyrosine-protein kinase, catalytic domain; IPR008271: Serine/threonine-protein kinase, active site; IPR011009: Protein kinase-like domain superfamily; IPR017441: Protein kinase, ATP binding site	-
Npp.01A003410.1	hypothetical protein SETIT_9G038500v2; U-box domain-containing protein 62 isoform X1	U-box domain-containing protein 62	U-box domain-containing protein 62	-	-	IPR013083: Zinc finger, RING/FYVE/PHD-type	-
Npp.01A003420.1	Transcription elongation factor TFIIS	Transcription elongation factor TFIIS	Transcription elongation factor TFIIS	KOG1105: Transcription elongation factor TFIIS/Cofactor of enhancer-binding protein Sp1	GO:0003676: nucleic acid binding; GO:0005634: nucleus; GO:0006351: transcription, DNA-templated; GO:0006355: regulation of transcription, DNA-templated; GO:0008270: zinc ion binding	IPR001222: Zinc finger, TFIIS-type; IPR003617: Transcription elongation factor, TFIIS/CRSP70, N-terminal, sub-type; IPR003618: Transcription elongation factor S-II, central domain; IPR006289: Transcription elongation factor, TFIIS; IPR017923: Transcription factor IIS, N-terminal; IPR035100: Transcription elongation factor, IIS-type; IPR035441: TFIIS/LEDGF domain superfamily; IPR036575: Transcript…	K03145: TFIIS;transcription elongation factor S-II
Npp.01A003430.1	ethylene-responsive transcription factor CRF4; hypothetical protein Zm00014a_018881	Ethylene-responsive transcription factor ERF110	Ethylene-responsive transcription factor ERF110	-	-	-	-
Npp.01A003440.1	uncharacterized protein LOC109945893; retrotransposon protein, putative, unclassified	-	-	-	-	IPR005162: Retrotransposon gag domain	-
Npp.01A003450.1	KH domain-containing protein SPIN1	Protein quaking-A; KH domain-containing protein SPIN1	Protein quaking-A; KH domain-containing protein SPIN1	KOG0119: Splicing factor 1/branch point binding protein (RRM superfamily); KOG1588: RNA-binding protein Sam68 and related KH domain proteins	GO:0003723: RNA binding	IPR004087: K Homology domain; IPR004088: K Homology domain, type 1; IPR031149: KH domain containing protein, SPIN1; IPR032377: STAR protein, homodimerisation region; IPR036612: K Homology domain, type 1 superfamily	K14945: QKI;protein quaking
Npp.01A003460.1	50S ribosomal protein L17	50S ribosomal protein L17, chloroplastic	50S ribosomal protein L17, chloroplastic	KOG3280: Mitochondrial/chloroplast ribosomal protein L17	GO:0003735: structural constituent of ribosome; GO:0005840: ribosome; GO:0006412: translation	IPR000456: Ribosomal protein L17; IPR036373: Ribosomal protein L17 superfamily	K02879: RP-L17,MRPL17,rplQ;large subunit ribosomal protein L17
Npp.01A003470.1	methylenetetrahydrofolate reductase 1	Methylenetetrahydrofolate reductase 1	Methylenetetrahydrofolate reductase 1	KOG0564: 5,10-methylenetetrahydrofolate reductase	GO:0004489: methylenetetrahydrofolate reductase (NAD(P)H) activity; GO:0006555: methionine metabolic process; GO:0055114: oxidation-reduction process	IPR003171: Methylenetetrahydrofolate reductase; IPR004621: Eukaryotic-type methylenetetrahydrofolate reductase; IPR029041: FAD-linked oxidoreductase-like	K00297: metF,MTHFR;methylenetetrahydrofolate reductase (NADPH) [EC:1.5.1.20]
Npp.01A003480.1	stress-induced NAc protein 1 SNAC1	NAC domain-containing protein 2	NAC domain-containing protein 2	-	-	-	-
Npp.01A003490.1	uncharacterized protein LOC100277618; hypothetical protein Zm00014a_018875	-	-	-	-	IPR025749: Sphingomyelin synthase-like domain	-
Npp.01A003500.1	vacuolar protein-sorting-associated protein 11 homolog	Vacuolar protein-sorting-associated protein 11 homolog	Vacuolar protein-sorting-associated protein 11 homolog	KOG2114: Vacuolar assembly/sorting protein PEP5/VPS11	GO:0005515: protein binding; GO:0006886: intracellular protein transport; GO:0016192: vesicle-mediated transport	IPR000547: Clathrin, heavy chain/VPS, 7-fold repeat; IPR001841: Zinc finger, RING-type; IPR011990: Tetratricopeptide-like helical domain superfamily; IPR016528: Vacuolar protein sorting-associated protein 11; IPR024763: Vacuolar protein sorting protein 11, C-terminal; IPR036322: WD40-repeat-containing domain superfamily	K20179: VPS11,PEP5;vacuolar protein sorting-associated protein 11
Npp.01A003510.1	probable calcium-binding protein CML32	Probable calcium-binding protein CML21	Probable calcium-binding protein CML21	-	GO:0005509: calcium ion binding	IPR002048: EF-hand domain; IPR011992: EF-hand domain pair; IPR018247: EF-Hand 1, calcium-binding site; IPR039647: EF-hand domain pair protein CML-like	-
Npp.01A003520.1	E3 ubiquitin-protein ligase RZF1-like	E3 ubiquitin-protein ligase SIRP1	E3 ubiquitin-protein ligase SIRP1	-	GO:0061630: ubiquitin protein ligase activity	IPR001841: Zinc finger, RING-type; IPR013083: Zinc finger, RING/FYVE/PHD-type; IPR039525: E3 ubiquitin-protein ligase RNF126-like, zinc-ribbon; IPR039738: E3 ubiquitin-protein ligase SIRP1	K11982: RNF115_126;E3 ubiquitin-protein ligase RNF115/126 [EC:2.3.2.27]
Npp.01A003530.1	probable DNA gyrase subunit A, chloroplastic/mitochondrial isoform X2	Probable DNA gyrase subunit A, chloroplastic/mitochondrial	Probable DNA gyrase subunit A, chloroplastic/mitochondrial	-	GO:0003677: DNA binding; GO:0003918: DNA topoisomerase type II (ATP-hydrolyzing) activity; GO:0005524: ATP binding; GO:0005694: chromosome; GO:0006265: DNA topological change	IPR002205: DNA topoisomerase, type IIA, subunit A/C-terminal; IPR005743: DNA gyrase, subunit A; IPR006691: DNA gyrase/topoisomerase IV, subunit A, C-terminal repeat; IPR013757: Type IIA DNA topoisomerase subunit A, alpha-helical domain superfamily; IPR013758: DNA topoisomerase, type IIA, subunit A/ C-terminal, alpha-beta; IPR013760: DNA topoisomerase, type IIA-like domain superfamily; IPR035516: …	K02469: gyrA;DNA gyrase subunit A [EC:5.6.2.2]
Npp.01A003540.1	ADP-ribosylation factor homolog1	ADP-ribosylation factor	ADP-ribosylation factor	KOG0071: GTP-binding ADP-ribosylation factor Arf6 (dArf3)	-	-	-
Npp.01A003550.1	hypothetical protein SORBI_3001G040900	NAC domain-containing protein 1	NAC domain-containing protein 1	-	GO:0003677: DNA binding; GO:0006355: regulation of transcription, DNA-templated	IPR003441: NAC domain; IPR036093: NAC domain superfamily	-
Npp.01A003560.1	splicing factor 3B subunit 6-like protein	Serine/arginine-rich splicing factor SR34B; Splicing factor 3B subunit 6-like protein	Serine/arginine-rich splicing factor SR34B; Splicing factor 3B subunit 6-like protein	KOG0114: Predicted RNA-binding protein (RRM superfamily)	GO:0003676: nucleic acid binding	IPR000504: RNA recognition motif domain; IPR012677: Nucleotide-binding alpha-beta plait domain superfamily; IPR034150: SF3B6, RNA recognition motif; IPR035979: RNA-binding domain superfamily	K12833: SF3B14;pre-mRNA branch site protein p14
Npp.01A003570.1	peptidyl-prolyl cis-trans isomerase CYP22	Peptidyl-prolyl cis-trans isomerase CYP22	Peptidyl-prolyl cis-trans isomerase CYP22	KOG0879: U-snRNP-associated cyclophilin type peptidyl-prolyl cis-trans isomerase	GO:0000413: protein peptidyl-prolyl isomerization; GO:0003755: peptidyl-prolyl cis-trans isomerase activity; GO:0006457: protein folding	IPR002130: Cyclophilin-type peptidyl-prolyl cis-trans isomerase domain; IPR020892: Cyclophilin-type peptidyl-prolyl cis-trans isomerase, conserved site; IPR024936: Cyclophilin-type peptidyl-prolyl cis-trans isomerase; IPR029000: Cyclophilin-like domain superfamily	K09567: PPIH,CYPH;peptidyl-prolyl isomerase H (cyclophilin H) [EC:5.2.1.8]
Npp.01A003580.1	protein MIZU-KUSSEI 1-like; hypothetical protein C2845_PM02G43830	-	-	-	GO:0010274: hydrotropism	IPR006460: Protein MIZU-KUSSEI 1-like, plant	-
Npp.01A003590.1	uncharacterized protein LOC8057081	-	-	-	-	-	-
Npp.01A003600.1	uncharacterized protein LOC8057397 isoform X2	-	-	KOG0934: Clathrin adaptor complex, small subunit; KOG0935: Clathrin adaptor complex, small subunit	GO:0006886: intracellular protein transport; GO:0016192: vesicle-mediated transport; GO:0030117: membrane coat	IPR000804: Clathrin adaptor complex, small chain; IPR001357: BRCT domain; IPR011012: Longin-like domain superfamily; IPR022775: AP complex, mu/sigma subunit; IPR036420: BRCT domain superfamily	-
Npp.01A003610.1	magnesium-chelatase subunit ChlD, chloroplastic isoform X1	Magnesium-chelatase subunit ChlD, chloroplastic	Magnesium-chelatase subunit ChlD, chloroplastic	-	GO:0005524: ATP binding; GO:0015995: chlorophyll biosynthetic process; GO:0016851: magnesium chelatase activity	IPR000523: Magnesium chelatase ChlI domain; IPR002035: von Willebrand factor, type A; IPR003593: AAA+ ATPase domain; IPR011776: Magnesium chelatase, ATPase subunit D; IPR027417: P-loop containing nucleoside triphosphate hydrolase; IPR036465: von Willebrand factor A-like domain superfamily; IPR041628: ChlI/MoxR, AAA lid domain; IPR041702: Magnesium-chelatase BchD/ChlD, VWA domain	K03404: chlD,bchD;magnesium chelatase subunit D [EC:6.6.1.1]
Npp.01A003620.1	triacylglycerol lipase SDP1	Patatin-like phospholipase domain-containing protein CNBE2340	Patatin-like phospholipase domain-containing protein CNBE2340	KOG2214: Predicted esterase of the alpha-beta hydrolase superfamily	GO:0004806: triglyceride lipase activity; GO:0006629: lipid metabolic process	IPR002641: Patatin-like phospholipase domain; IPR016035: Acyl transferase/acyl hydrolase/lysophospholipase; IPR021771: Triacylglycerol lipase	K14674: TGL4;TAG lipase / steryl ester hydrolase / phospholipase A2 / LPA acyltransferase [EC:3.1.1.3 3.1.1.13 3.1.1.4 2.3.1.51]
Npp.01A003630.1	zerumbone synthase	Xanthoxin dehydrogenase	Xanthoxin dehydrogenase	KOG1199: Short-chain alcohol dehydrogenase/3-hydroxyacyl-CoA dehydrogenase	-	IPR002347: Short-chain dehydrogenase/reductase SDR; IPR036291: NAD(P)-binding domain superfamily	K09841: ABA2;xanthoxin dehydrogenase [EC:1.1.1.288]
Npp.01A003640.1	mitochondrial Rho GTPase 1	Mitochondrial Rho GTPase 1	Mitochondrial Rho GTPase 1	KOG1707: Predicted Ras related/Rac-GTP binding protein	GO:0003924: GTPase activity; GO:0005509: calcium ion binding; GO:0005525: GTP binding; GO:0007005: mitochondrion organization; GO:0031307: integral component of mitochondrial outer membrane	IPR001806: Small GTPase; IPR002048: EF-hand domain; IPR011992: EF-hand domain pair; IPR013566: EF hand associated, type-1; IPR013567: EF hand associated, type-2; IPR018247: EF-Hand 1, calcium-binding site; IPR020860: MIRO domain; IPR021181: Mitochondrial Rho GTPase; IPR027417: P-loop containing nucleoside triphosphate hydrolase	K07870: RHOT1,ARHT1;mitochondrial Rho GTPase 1 [EC:3.6.5.-]
Npp.01A003660.1	protein CDI	-	-	-	-	IPR029044: Nucleotide-diphospho-sugar transferases	-
Npp.01A003670.1	nudix hydrolase 16, mitochondrial	Diphosphoinositol polyphosphate phosphohydrolase 1; Nudix hydrolase 16, mitochondrial	Diphosphoinositol polyphosphate phosphohydrolase 1; Nudix hydrolase 16, mitochondrial	KOG2839: Diadenosine and diphosphoinositol polyphosphate phosphohydrolase	GO:0016787: hydrolase activity	IPR000086: NUDIX hydrolase domain; IPR015797: NUDIX hydrolase-like domain superfamily; IPR020084: NUDIX hydrolase, conserved site	K07766: E3.6.1.52;diphosphoinositol-polyphosphate diphosphatase [EC:3.6.1.52]
Npp.01A003690.1	adenylate isopentenyltransferase 5, chloroplastic	Adenylate isopentenyltransferase 5, chloroplastic	Adenylate isopentenyltransferase 5, chloroplastic	KOG1384: tRNA delta(2)-isopentenylpyrophosphate transferase	-	IPR027417: P-loop containing nucleoside triphosphate hydrolase; IPR039657: Dimethylallyltransferase	K10760: IPT;adenylate dimethylallyltransferase (cytokinin synthase) [EC:2.5.1.27 2.5.1.112]
Npp.01A003700.1	Lariat debranching enzyme	Lariat debranching enzyme	Lariat debranching enzyme	KOG2863: RNA lariat debranching enzyme	GO:0006397: mRNA processing; GO:0016788: hydrolase activity, acting on ester bonds	IPR007708: Lariat debranching enzyme, C-terminal	K18328: DBR1;lariat debranching enzyme [EC:3.1.-.-]
Npp.01A003720.1	Protein GLE1	-	-	-	GO:0005643: nuclear pore; GO:0016973: poly(A)+ mRNA export from nucleus	IPR012476: GLE1-like	-
Npp.01A003730.1	uncharacterized protein LOC8057087	-	-	-	-	-	-
Npp.01A003740.1	uncharacterized protein LOC8057090 isoform X2; hypothetical protein ZEAMMB73_Zm00001d034581	-	-	-	-	IPR006927: Protein of unknown function DUF639	-
Npp.01A003750.1	uncharacterized protein C2845_PM02G43970; hypothetical protein SETIT_9G042700v2	-	-	-	GO:0046872: metal ion binding	IPR001841: Zinc finger, RING-type; IPR013083: Zinc finger, RING/FYVE/PHD-type; IPR017907: Zinc finger, RING-type, conserved site; IPR018957: Zinc finger, C3HC4 RING-type	-
Npp.01A003760.1	hypothetical protein Zm00014a_018855	-	-	-	-	-	-
Npp.01A003770.1	hypothetical protein SORBI_3002G143600; uncharacterized protein C2845_PM05G18820	-	-	-	-	-	-
Npp.01A003780.1	probable protein phosphatase 2C 55	Probable protein phosphatase 2C 55	Probable protein phosphatase 2C 55	KOG1379: Serine/threonine protein phosphatase	GO:0003824: catalytic activity	IPR001932: PPM-type phosphatase domain; IPR036457: PPM-type phosphatase domain superfamily; IPR039123: Protein phosphatase 2C	K17508: PTC7,PPTC7;protein phosphatase PTC7 [EC:3.1.3.16]
Npp.01A003790.1	hypothetical protein SORBI_3001G034000	-	-	-	GO:0003690: double-stranded DNA binding; GO:0006355: regulation of transcription, DNA-templated	IPR003690: Transcription termination factor, mitochondrial/chloroplastic; IPR038538: MTERF superfamily, mitochondrial/chloroplastic	K15032: MTERFD;mTERF domain-containing protein,mitochondrial
Npp.01A003800.1	TLC domain-containing protein	-	-	-	GO:0016021: integral component of membrane	IPR006634: TRAM/LAG1/CLN8 homology domain; IPR040327: TLC domain-containing protein At5g14285-like	-
Npp.01A003810.1	protein synthesis inhibitor II	Ribosome-inactivating protein charybdin	Ribosome-inactivating protein charybdin	-	GO:0017148: negative regulation of translation; GO:0030598: rRNA N-glycosylase activity	IPR001574: Ribosome-inactivating protein; IPR016138: Ribosome-inactivating protein, subdomain 1; IPR017989: Ribosome-inactivating protein type 1/2; IPR036041: Ribosome-inactivating protein superfamily	-
Npp.01A003820.1	DNA-binding protein EMBP-1 isoform X2; hypothetical protein SORBI_3001G044300	-	-	-	GO:0003700: DNA binding transcription factor activity; GO:0006355: regulation of transcription, DNA-templated	IPR004827: Basic-leucine zipper domain	K09060: GBF;plant G-box-binding factor
Npp.01A003830.1	cytokinin-O-glucosyltransferase 2	UDP-glycosyltransferase 83A1; Linamarin synthase 2	UDP-glycosyltransferase 83A1; Linamarin synthase 2	-	-	-	-
Npp.01A003840.1	UDP-glycosyltransferase 83A1	UDP-glycosyltransferase 83A1	UDP-glycosyltransferase 83A1	-	GO:0008194: UDP-glycosyltransferase activity	IPR002213: UDP-glucuronosyl/UDP-glucosyltransferase; IPR035595: UDP-glycosyltransferase family, conserved site	-
Npp.01A003850.1	uncharacterized protein LOC112873796; hypothetical protein GQ55_9G038900	-	-	-	GO:0022857: transmembrane transporter activity; GO:0055085: transmembrane transport	IPR011701: Major facilitator superfamily; IPR020846: Major facilitator superfamily domain; IPR036259: MFS transporter superfamily	-
Npp.01A003860.1	protein ROOT PRIMORDIUM DEFECTIVE 1	Protein WHAT&apos;S THIS FACTOR 1, chloroplastic	Protein WHAT&apos;S THIS FACTOR 1, chloroplastic	-	-	-	-
Npp.01A003870.1	probable galactinol--sucrose galactosyltransferase 2	Probable galactinol--sucrose galactosyltransferase 2	Probable galactinol--sucrose galactosyltransferase 2	-	GO:0003824: catalytic activity	IPR008811: Glycosyl hydrolases 36; IPR013785: Aldolase-type TIM barrel; IPR017853: Glycoside hydrolase superfamily	K06617: E2.4.1.82;raffinose synthase [EC:2.4.1.82]
Npp.01A003880.1	probable tRNA (guanine(26)-N(2))-dimethyltransferase 1	Probable tRNA (guanine(26)-N(2))-dimethyltransferase 1	Probable tRNA (guanine(26)-N(2))-dimethyltransferase 1	KOG1253: tRNA methyltransferase	GO:0003723: RNA binding; GO:0004809: tRNA (guanine-N2-)-methyltransferase activity; GO:0008033: tRNA processing	IPR002905: tRNA methyltransferase, Trm1; IPR029063: S-adenosyl-L-methionine-dependent methyltransferase; IPR042296: tRNA methyltransferase, Trm1, C-terminal	-
Npp.01A003890.1	calcium-dependent protein kinase 8	Calcium-dependent protein kinase 20	Calcium-dependent protein kinase 20	-	GO:0004672: protein kinase activity; GO:0005509: calcium ion binding; GO:0005524: ATP binding; GO:0006468: protein phosphorylation	IPR000719: Protein kinase domain; IPR002048: EF-hand domain; IPR008271: Serine/threonine-protein kinase, active site; IPR011009: Protein kinase-like domain superfamily; IPR011992: EF-hand domain pair; IPR017441: Protein kinase, ATP binding site; IPR018247: EF-Hand 1, calcium-binding site	K13412: CPK;calcium-dependent protein kinase [EC:2.7.11.1]
Npp.01A003900.1	cationic peroxidase 2	Cationic peroxidase 2	Cationic peroxidase 2	-	GO:0004601: peroxidase activity; GO:0006979: response to oxidative stress; GO:0020037: heme binding; GO:0042744: hydrogen peroxide catabolic process; GO:0055114: oxidation-reduction process	IPR000823: Plant peroxidase; IPR002016: Haem peroxidase; IPR010255: Haem peroxidase superfamily; IPR019793: Peroxidases heam-ligand binding site; IPR019794: Peroxidase, active site; IPR033905: Secretory peroxidase	K00430: E1.11.1.7;peroxidase [EC:1.11.1.7]
Npp.01A003910.1	uncharacterized protein LOC100384285 isoform X2; hypothetical protein SORBI_3001G045300	Ubiquitin-60S ribosomal protein L40	Ubiquitin-60S ribosomal protein L40	-	GO:0005515: protein binding	IPR000626: Ubiquitin-like domain; IPR024752: Myb/SANT-like domain; IPR029071: Ubiquitin-like domain superfamily	-
Npp.01A003920.1	polygalacturonase ADPG2	Polygalacturonase	Polygalacturonase	-	GO:0004650: polygalacturonase activity; GO:0005975: carbohydrate metabolic process	IPR000743: Glycoside hydrolase, family 28; IPR006626: Parallel beta-helix repeat; IPR011050: Pectin lyase fold/virulence factor; IPR012334: Pectin lyase fold	K01184: E3.2.1.15;polygalacturonase [EC:3.2.1.15]
Npp.01A003930.1	hypothetical protein SORBI_3001G045500	NAC domain-containing protein 7	NAC domain-containing protein 7	-	GO:0003677: DNA binding; GO:0006355: regulation of transcription, DNA-templated	IPR003441: NAC domain; IPR036093: NAC domain superfamily	-
Npp.01A003940.1	remorin 4.1	Remorin 4.1	Remorin 4.1	-	-	IPR005516: Remorin, C-terminal	-
Npp.01A003950.1	uncharacterized protein LOC8061417	-	-	-	-	-	-
Npp.01A003960.1	Disease resistance protein RPM1	Disease resistance protein RPP13	Disease resistance protein RPP13	-	GO:0043531: ADP binding	IPR002182: NB-ARC; IPR027417: P-loop containing nucleoside triphosphate hydrolase	-
Npp.01A003970.1	Disease resistance protein RPM1	Cysteine-rich receptor-like protein kinase 41	Cysteine-rich receptor-like protein kinase 41	-	GO:0004672: protein kinase activity; GO:0005524: ATP binding; GO:0006468: protein phosphorylation	IPR000719: Protein kinase domain; IPR008271: Serine/threonine-protein kinase, active site; IPR011009: Protein kinase-like domain superfamily; IPR017441: Protein kinase, ATP binding site	K17302: COPB2,SEC27;coatomer subunit beta'
Npp.01A003980.1	probable protein phosphatase 2C 68	Probable protein phosphatase 2C 68	Probable protein phosphatase 2C 68	-	GO:0004722: protein serine/threonine phosphatase activity; GO:0006470: protein dephosphorylation	IPR001932: PPM-type phosphatase domain; IPR015655: Protein phosphatase 2C family; IPR036457: PPM-type phosphatase domain superfamily	-
Npp.01A003990.1	cellulose synthase catalytic subunit 5	Probable cellulose synthase A catalytic subunit 2 [UDP-forming]	Probable cellulose synthase A catalytic subunit 2 [UDP-forming]	-	-	-	K10999: CESA;cellulose synthase A [EC:2.4.1.12]
Npp.01A004000.1	polygalacturonase	Polygalacturonase	Polygalacturonase	-	GO:0004650: polygalacturonase activity; GO:0005975: carbohydrate metabolic process	IPR000743: Glycoside hydrolase, family 28; IPR006626: Parallel beta-helix repeat; IPR011050: Pectin lyase fold/virulence factor; IPR012334: Pectin lyase fold	K01184: E3.2.1.15;polygalacturonase [EC:3.2.1.15]
Npp.01A004010.1	polygalacturonase	Polygalacturonase	Polygalacturonase	-	GO:0004650: polygalacturonase activity; GO:0005975: carbohydrate metabolic process	IPR000743: Glycoside hydrolase, family 28; IPR006626: Parallel beta-helix repeat; IPR011050: Pectin lyase fold/virulence factor; IPR012334: Pectin lyase fold	K01184: E3.2.1.15;polygalacturonase [EC:3.2.1.15]
Npp.01A004020.1	polygalacturonase ADPG2	Polygalacturonase ADPG2	Polygalacturonase ADPG2	-	GO:0004650: polygalacturonase activity; GO:0005975: carbohydrate metabolic process	IPR000743: Glycoside hydrolase, family 28; IPR006626: Parallel beta-helix repeat; IPR011050: Pectin lyase fold/virulence factor; IPR012334: Pectin lyase fold	K01184: E3.2.1.15;polygalacturonase [EC:3.2.1.15]
Npp.01A004030.1	polygalacturonase	Polygalacturonase	Polygalacturonase	-	GO:0004650: polygalacturonase activity; GO:0005975: carbohydrate metabolic process	IPR000743: Glycoside hydrolase, family 28; IPR011050: Pectin lyase fold/virulence factor; IPR012334: Pectin lyase fold	K01184: E3.2.1.15;polygalacturonase [EC:3.2.1.15]
Npp.01A004040.1	polygalacturonase	Polygalacturonase	Polygalacturonase	-	-	-	K01184: E3.2.1.15;polygalacturonase [EC:3.2.1.15]
Npp.01A004050.1	polygalacturonase	Polygalacturonase	Polygalacturonase	-	GO:0004650: polygalacturonase activity; GO:0005975: carbohydrate metabolic process	IPR000743: Glycoside hydrolase, family 28; IPR006626: Parallel beta-helix repeat; IPR011050: Pectin lyase fold/virulence factor; IPR012334: Pectin lyase fold	K01184: E3.2.1.15;polygalacturonase [EC:3.2.1.15]
Npp.01A004060.1	chaperonin-like RbcX protein 2, chloroplastic	-	-	-	-	IPR003435: Chaperonin-like RbcX; IPR038052: Chaperonin-like RbcX superfamily	-
Npp.01A004070.1	40S ribosomal protein S2-3	40S ribosomal protein S2-4	40S ribosomal protein S2-4	KOG0877: 40S ribosomal protein S2/30S ribosomal protein S5	GO:0003723: RNA binding; GO:0003735: structural constituent of ribosome; GO:0005840: ribosome; GO:0006412: translation; GO:0015935: small ribosomal subunit	IPR000851: Ribosomal protein S5; IPR005324: Ribosomal protein S5, C-terminal; IPR005711: Ribosomal protein S5, eukaryotic/archaeal; IPR013810: Ribosomal protein S5, N-terminal; IPR014721: Ribosomal protein S5 domain 2-type fold, subgroup; IPR018192: Ribosomal protein S5, N-terminal, conserved site; IPR020568: Ribosomal protein S5 domain 2-type fold	K02981: RP-S2e,RPS2;small subunit ribosomal protein S2e
Npp.01A004080.1	uncharacterized protein LOC8081206; hypothetical protein Zm00014a_016573	-	-	-	-	IPR006946: Domain of unknown function DUF642; IPR008979: Galactose-binding-like domain superfamily	-
Npp.01A004090.1	cycloartenol-C-24-methyltransferase 1 isoform X2	Cycloartenol-C-24-methyltransferase 1	Cycloartenol-C-24-methyltransferase 1	KOG1269: SAM-dependent methyltransferases	GO:0006694: steroid biosynthetic process; GO:0008168: methyltransferase activity	IPR013216: Methyltransferase type 11; IPR013705: Sterol methyltransferase C-terminal; IPR029063: S-adenosyl-L-methionine-dependent methyltransferase; IPR030384: SAM-dependent methyltransferase SMT-type	K00559: SMT1,ERG6;sterol 24-C-methyltransferase [EC:2.1.1.41]
Npp.01A004100.1	blue copper protein	Mavicyanin; Blue copper protein	Mavicyanin; Blue copper protein	-	GO:0009055: electron transfer activity	IPR003245: Phytocyanin domain; IPR008972: Cupredoxin; IPR039391: Phytocyanin	-
Npp.01A004110.1	photosystem I reaction center subunit II	Photosystem I reaction center subunit II, chloroplastic	Photosystem I reaction center subunit II, chloroplastic	-	GO:0009522: photosystem I; GO:0009538: photosystem I reaction center; GO:0015979: photosynthesis	IPR003685: Photosystem I PsaD; IPR036579: Photosystem I, reaction centre subunit PsaD superfamily	K02692: psaD;photosystem I subunit II
Npp.01A004120.1	uncharacterized protein LOC8081209 isoform X1	-	-	-	-	IPR012438: Protein of unknown function DUF1639	-
Npp.01A004130.1	OTU domain-containing protein 6B	Deubiquitinase OTUD6B	Deubiquitinase OTUD6B	KOG2606: OTU (ovarian tumor)-like cysteine protease	-	IPR003323: OTU domain; IPR038765: Papain-like cysteine peptidase superfamily	K18342: OTUD6;OTU domain-containing protein 6 [EC:3.4.19.12]
Npp.01A004140.1	uncharacterized protein C2845_PM01G22830; hypothetical protein SORBI_3001G047200	-	-	-	-	IPR004314: Neprosin; IPR025521: Neprosin activation peptide	-
Npp.01A004170.1	vacuolar protein sorting-associated protein 32 homolog 2	Charged multivesicular body protein 4b; Vacuolar protein sorting-associated protein 32 homolog 1	Charged multivesicular body protein 4b; Vacuolar protein sorting-associated protein 32 homolog 1	KOG1656: Protein involved in glucose derepression and pre-vacuolar endosome protein sorting	GO:0007034: vacuolar transport	IPR005024: Snf7 family	K12194: CHMP4,SNF7,VPS32;charged multivesicular body protein 4
Npp.01A004190.1	uncharacterized protein LOC8063854 isoform X1; retrotransposon protein, putative, Ty1-copia subclass	Retrovirus-related Pol polyprotein from transposon RE1	Retrovirus-related Pol polyprotein from transposon RE1	-	-	IPR013103: Reverse transcriptase, RNA-dependent DNA polymerase; IPR043502: DNA/RNA polymerase superfamily	-
Npp.01A004200.1	Retrotransposon-like protein; hypothetical protein Zm00014a_014180	-	-	-	-	IPR025476: Helitron helicase-like domain	-
Npp.01A004210.1	hypothetical protein ZEAMMB73_Zm00001d037977	-	-	-	GO:0000723: telomere maintenance; GO:0003678: DNA helicase activity; GO:0006281: DNA repair	IPR010285: DNA helicase Pif1-like; IPR012340: Nucleic acid-binding, OB-fold; IPR013955: Replication factor A, C-terminal	-
Npp.01A004220.1	PREDICTED: uncharacterized protein LOC102704740 isoform X1	-	-	-	-	-	-
Npp.01A004230.1	uncharacterized protein LOC8081212	-	-	-	-	IPR008586: Protein of unknown function DUF868, plant	-
Npp.01A004250.1	uncharacterized protein LOC101783775 isoform X1; hypothetical protein SETIT_9G046400v2	-	-	-	-	-	-
Npp.01A004260.1	5&apos;-adenylylsulfate reductase-like 5 isoform X1	5&apos;-adenylylsulfate reductase-like 5	5&apos;-adenylylsulfate reductase-like 5	KOG2640: Thioredoxin	-	IPR013766: Thioredoxin domain; IPR036249: Thioredoxin-like superfamily	-
Npp.01A004270.1	uncharacterized protein LOC8081215; elongation factor P	Elongation factor P	Elongation factor P	-	GO:0003746: translation elongation factor activity; GO:0005737: cytoplasm; GO:0006414: translational elongation; GO:0043043: peptide biosynthetic process	IPR001059: Translation elongation factor P/YeiP, central; IPR008991: Translation protein SH3-like domain superfamily; IPR011768: Translation elongation factor P; IPR012340: Nucleic acid-binding, OB-fold; IPR013185: Translation elongation factor, KOW-like; IPR014722: Ribosomal protein L2, domain 2; IPR015365: Elongation factor P, C-terminal; IPR020599: Translation elongation factor P/YeiP	-
Npp.01A004280.1	protochlorophyllide-dependent translocon component 52, chloroplastic; hypothetical protein SORBI_3001G048400	Protochlorophyllide-dependent translocon component 52, chloroplastic; Dicamba O-demethylase, oxygenase component	Protochlorophyllide-dependent translocon component 52, chloroplastic; Dicamba O-demethylase, oxygenase component	-	GO:0010277: chlorophyllide a oxygenase [overall] activity; GO:0051537: 2 iron, 2 sulfur cluster binding; GO:0055114: oxidation-reduction process	IPR013626: Pheophorbide a oxygenase; IPR017941: Rieske [2Fe-2S] iron-sulphur domain; IPR036922: Rieske [2Fe-2S] iron-sulphur domain superfamily	-
Npp.01A004290.1	uncharacterized protein LOC110431719	-	-	-	-	-	-
Npp.01A004300.1	protochlorophyllide-dependent translocon component 52, chloroplastic-like	Protochlorophyllide-dependent translocon component 52, chloroplastic	Protochlorophyllide-dependent translocon component 52, chloroplastic	-	GO:0010277: chlorophyllide a oxygenase [overall] activity; GO:0051537: 2 iron, 2 sulfur cluster binding; GO:0055114: oxidation-reduction process	IPR013626: Pheophorbide a oxygenase; IPR017941: Rieske [2Fe-2S] iron-sulphur domain; IPR036922: Rieske [2Fe-2S] iron-sulphur domain superfamily	-
Npp.01A004310.1	EVI5-like protein	EVI5-like protein	EVI5-like protein	KOG2221: PDZ-domain interacting protein EPI64, contains TBC domain; KOG4436: Predicted GTPase activator NB4S/EVI5 (contains TBC domain)/Calmodulin-binding protein Pollux (contains PTB and TBC domains)	-	IPR000195: Rab-GTPase-TBC domain; IPR035969: Rab-GTPase-TBC domain superfamily	K19944: TBC1D10;TBC1 domain family member 10
Npp.01A004320.1	mitochondrial pyruvate carrier 1 isoform X2	Mitochondrial pyruvate carrier 1	Mitochondrial pyruvate carrier 1	KOG1589: Uncharacterized conserved protein; KOG1590: Uncharacterized conserved protein	GO:0005743: mitochondrial inner membrane; GO:0006850: mitochondrial pyruvate transmembrane transport	IPR005336: Mitochondrial pyruvate carrier	K22138: MPC1;mitochondrial pyruvate carrier 1
Npp.01A004330.1	mitochondrial pyruvate carrier 1 isoform X2	Mitochondrial pyruvate carrier 1	Mitochondrial pyruvate carrier 1	KOG1589: Uncharacterized conserved protein; KOG1590: Uncharacterized conserved protein	GO:0005743: mitochondrial inner membrane; GO:0006850: mitochondrial pyruvate transmembrane transport	IPR005336: Mitochondrial pyruvate carrier	K22138: MPC1;mitochondrial pyruvate carrier 1
Npp.01A004340.1	uncharacterized LOC100282246	-	-	-	-	-	-
Npp.01A004350.1	hypothetical protein C2845_PM01G33420	-	-	-	-	IPR024752: Myb/SANT-like domain	-
Npp.01A004360.1	calcium-dependent protein kinase 8	Calcium-dependent protein kinase 20	Calcium-dependent protein kinase 20	-	GO:0004672: protein kinase activity; GO:0005509: calcium ion binding; GO:0005524: ATP binding; GO:0006468: protein phosphorylation	IPR000719: Protein kinase domain; IPR002048: EF-hand domain; IPR008271: Serine/threonine-protein kinase, active site; IPR011009: Protein kinase-like domain superfamily; IPR011992: EF-hand domain pair; IPR017441: Protein kinase, ATP binding site; IPR018247: EF-Hand 1, calcium-binding site	K13412: CPK;calcium-dependent protein kinase [EC:2.7.11.1]
Npp.01A004370.1	putative tRNA (guanine(26)-N(2))-dimethyltransferase 2	Probable tRNA (guanine(26)-N(2))-dimethyltransferase 1	Probable tRNA (guanine(26)-N(2))-dimethyltransferase 1	KOG1253: tRNA methyltransferase	GO:0003723: RNA binding; GO:0004809: tRNA (guanine-N2-)-methyltransferase activity; GO:0008033: tRNA processing	IPR002905: tRNA methyltransferase, Trm1; IPR029063: S-adenosyl-L-methionine-dependent methyltransferase; IPR042296: tRNA methyltransferase, Trm1, C-terminal	K00555: TRMT1,trm1;tRNA (guanine26-N2/guanine27-N2)-dimethyltransferase [EC:2.1.1.215 2.1.1.216]
Npp.01A004380.1	probable acyl-activating enzyme 18, peroxisomal isoform X1	Acetyl-coenzyme A synthetase	Acetyl-coenzyme A synthetase	-	GO:0003824: catalytic activity	IPR000873: AMP-dependent synthetase/ligase; IPR020845: AMP-binding, conserved site; IPR042099: AMP-dependent synthetase-like superfamily	-
Npp.01A004400.1	probable acyl-activating enzyme 18, peroxisomal isoform X1	Acetyl-coenzyme A synthetase	Acetyl-coenzyme A synthetase	-	GO:0003824: catalytic activity	IPR000873: AMP-dependent synthetase/ligase; IPR020845: AMP-binding, conserved site; IPR042099: AMP-dependent synthetase-like superfamily	-
Npp.01A004410.1	lipid phosphate phosphatase delta	Lipid phosphate phosphatase delta	Lipid phosphate phosphatase delta	KOG2822: Sphingoid base-phosphate phosphatase	-	IPR000326: Phosphatidic acid phosphatase type 2/haloperoxidase; IPR036938: Phosphatidic acid phosphatase type 2/haloperoxidase superfamily	-
Npp.01A004420.1	putative serine/threonine protein phosphatase superfamily protein	Serine/threonine-protein phosphatase PP2A-2 catalytic subunit	Serine/threonine-protein phosphatase PP2A-2 catalytic subunit	KOG0371: Serine/threonine protein phosphatase 2A, catalytic subunit	GO:0016787: hydrolase activity	IPR004843: Calcineurin-like phosphoesterase domain, ApaH type; IPR006186: Serine/threonine-specific protein phosphatase/bis(5-nucleosyl)-tetraphosphatase; IPR029052: Metallo-dependent phosphatase-like	K04382: PPP2C;serine/threonine-protein phosphatase 2A catalytic subunit [EC:3.1.3.16]
Npp.01A004430.1	DEAD-box ATP-dependent RNA helicase 37-like	DEAD-box ATP-dependent RNA helicase 52B	DEAD-box ATP-dependent RNA helicase 52B	KOG0335: ATP-dependent RNA helicase	GO:0003676: nucleic acid binding; GO:0005524: ATP binding	IPR001650: Helicase, C-terminal; IPR011545: DEAD/DEAH box helicase domain; IPR014001: Helicase superfamily 1/2, ATP-binding domain; IPR014014: RNA helicase, DEAD-box type, Q motif; IPR027417: P-loop containing nucleoside triphosphate hydrolase	K11594: DDX3X,bel;ATP-dependent RNA helicase DDX3X [EC:3.6.4.13]
Npp.01A004440.1	squalene synthase	Squalene synthase 1	Squalene synthase 1	KOG1459: Squalene synthetase	GO:0004310: farnesyl-diphosphate farnesyltransferase activity; GO:0008610: lipid biosynthetic process; GO:0016021: integral component of membrane; GO:0051996: squalene synthase activity	IPR002060: Squalene/phytoene synthase; IPR006449: Squalene synthase-like; IPR008949: Isoprenoid synthase domain superfamily; IPR019845: Squalene/phytoene synthase, conserved site; IPR033904: Trans-Isoprenyl Diphosphate Synthases, head-to-head	K00801: FDFT1;farnesyl-diphosphate farnesyltransferase [EC:2.5.1.21]
Npp.01A004450.1	putative UDP-rhamnose:rhamnosyltransferase 1	Putative UDP-rhamnose:rhamnosyltransferase 1	Putative UDP-rhamnose:rhamnosyltransferase 1	-	GO:0008194: UDP-glycosyltransferase activity	IPR002213: UDP-glucuronosyl/UDP-glucosyltransferase	-
Npp.01A004460.1	hypothetical protein SORBI_3001G053100, partial	-	-	-	-	IPR011676: Domain of unknown function DUF1618	-
Npp.01A004470.1	homeobox-DDT domain protein RLT3; hypothetical protein SETIT_9G470200v2	Homeobox-DDT domain protein RLT3	Homeobox-DDT domain protein RLT3	-	GO:0003677: DNA binding	IPR001356: Homeobox domain; IPR009057: Homeobox-like domain superfamily; IPR018501: DDT domain; IPR028941: WHIM2 domain; IPR028942: WHIM1 domain	-
Npp.01A004480.1	putative UDP-rhamnose:rhamnosyltransferase 1	Putative UDP-rhamnose:rhamnosyltransferase 1	Putative UDP-rhamnose:rhamnosyltransferase 1	-	GO:0008194: UDP-glycosyltransferase activity	IPR002213: UDP-glucuronosyl/UDP-glucosyltransferase; IPR035595: UDP-glycosyltransferase family, conserved site	-
Npp.01A004490.1	germin-like protein 3-7	Germin-like protein 3-7	Germin-like protein 3-7	-	-	-	-
Npp.01A004500.1	exocyst complex component EXO84B	Exocyst complex component EXO84B	Exocyst complex component EXO84B	-	GO:0000145: exocyst; GO:0006887: exocytosis	IPR016159: Cullin repeat-like-containing domain superfamily; IPR032403: Exocyst component Exo84, C-terminal; IPR033961: Exocyst complex component Exo84	K19986: EXOC8,SEC84;exocyst complex component 8
Npp.01A004510.1	protein YLS3	Non-specific lipid transfer protein GPI-anchored 1	Non-specific lipid transfer protein GPI-anchored 1	-	-	IPR016140: Bifunctional inhibitor/plant lipid transfer protein/seed storage helical domain; IPR036312: Bifunctional inhibitor/plant lipid transfer protein/seed storage helical domain superfamily; IPR043325: Alpha-Amylase Inhibitors (AAI), Lipid Transfer (LT) and Seed Storage (SS) Protein	-
Npp.01A004520.1	uncharacterized protein LOC100275981 precursor; hypothetical protein ZEAMMB73_Zm00001d034512	-	-	-	-	-	-
Npp.01A004530.1	hydroxyproline O-galactosyltransferase GALT6	Hydroxyproline O-galactosyltransferase GALT6	Hydroxyproline O-galactosyltransferase GALT6	-	GO:0006486: protein glycosylation; GO:0016020: membrane; GO:0030246: carbohydrate binding	IPR001079: Galectin, carbohydrate recognition domain; IPR002659: Glycosyl transferase, family 31; IPR013320: Concanavalin A-like lectin/glucanase domain superfamily	K20843: GALT2S;hydroxyproline O-galactosyltransferase 2/3/4/5/6 [EC:2.4.1.-]
Npp.01A004540.1	uncharacterized protein LOC8061137; hypothetical protein SORBI_3001G050600	-	-	-	-	IPR024975: Domain of unknown function DUF3883; IPR036890: Histidine kinase/HSP90-like ATPase superfamily	-
Npp.01A004550.1	uncharacterized protein LOC8061138 isoform X1	50S ribosomal protein L4	50S ribosomal protein L4	KOG1624: Mitochondrial/chloroplast ribosomal protein L4	GO:0003735: structural constituent of ribosome; GO:0005840: ribosome; GO:0006412: translation	IPR002136: Ribosomal protein L4/L1e; IPR013005: 50S ribosomal protein uL4; IPR023574: Ribosomal protein L4 domain superfamily	K02926: RP-L4,MRPL4,rplD;large subunit ribosomal protein L4
Npp.01A004560.1	hydroxyproline O-galactosyltransferase GALT6	Hydroxyproline O-galactosyltransferase GALT5	Hydroxyproline O-galactosyltransferase GALT5	-	GO:0006486: protein glycosylation; GO:0016020: membrane; GO:0030246: carbohydrate binding	IPR001079: Galectin, carbohydrate recognition domain; IPR002659: Glycosyl transferase, family 31; IPR013320: Concanavalin A-like lectin/glucanase domain superfamily	K20843: GALT2S;hydroxyproline O-galactosyltransferase 2/3/4/5/6 [EC:2.4.1.-]
Npp.01A004570.1	probable prolyl 4-hydroxylase 6	Probable prolyl 4-hydroxylase 7	Probable prolyl 4-hydroxylase 7	KOG1591: Prolyl 4-hydroxylase alpha subunit	-	-	K00472: P4HA;prolyl 4-hydroxylase [EC:1.14.11.2]
Npp.01A004590.1	vesicle-associated membrane protein 725	Vesicle-associated membrane protein 725	Vesicle-associated membrane protein 725	KOG0859: Synaptobrevin/VAMP-like protein	GO:0016021: integral component of membrane; GO:0016192: vesicle-mediated transport	IPR001388: Synaptobrevin; IPR010908: Longin domain; IPR011012: Longin-like domain superfamily; IPR042855: v-SNARE, coiled-coil homology domain	K08511: ATVAMP72;vesicle-associated membrane protein 72
Npp.01A004600.1	transcription factor bHLH79	Transcription factor BHLH094	Transcription factor BHLH094	-	GO:0006355: regulation of transcription, DNA-templated; GO:0046983: protein dimerization activity	IPR011598: Myc-type, basic helix-loop-helix (bHLH) domain; IPR024097: Basic helix-loop-helix leucine zipper transcription factor; IPR036638: Helix-loop-helix DNA-binding domain superfamily	-
Npp.01A004610.1	DDT domain-containing protein DDR4 isoform X1	-	-	-	-	IPR018501: DDT domain	-
Npp.01A004620.1	DEAD-box ATP-dependent RNA helicase 27	DEAD-box ATP-dependent RNA helicase 27	DEAD-box ATP-dependent RNA helicase 27	KOG0343: RNA Helicase; KOG0348: ATP-dependent RNA helicase	GO:0003676: nucleic acid binding; GO:0005524: ATP binding	IPR000629: ATP-dependent RNA helicase DEAD-box, conserved site; IPR001650: Helicase, C-terminal; IPR011545: DEAD/DEAH box helicase domain; IPR014001: Helicase superfamily 1/2, ATP-binding domain; IPR014014: RNA helicase, DEAD-box type, Q motif; IPR025313: Domain of unknown function DUF4217; IPR027417: P-loop containing nucleoside triphosphate hydrolase	K13179: DDX18,HAS1;ATP-dependent RNA helicase DDX18/HAS1 [EC:3.6.4.13]
Npp.01A004630.1	AAA-ATPase At3g28580	AAA-ATPase ASD, mitochondrial	AAA-ATPase ASD, mitochondrial	KOG0743: AAA+-type ATPase	GO:0005524: ATP binding	IPR003593: AAA+ ATPase domain; IPR003959: ATPase, AAA-type, core; IPR003960: ATPase, AAA-type, conserved site; IPR025753: AAA-type ATPase, N-terminal domain; IPR027417: P-loop containing nucleoside triphosphate hydrolase	-
Npp.01A004640.1	AAA-ATPase At3g28580	AAA-ATPase ASD, mitochondrial	AAA-ATPase ASD, mitochondrial	KOG0743: AAA+-type ATPase	GO:0005524: ATP binding	IPR003593: AAA+ ATPase domain; IPR003959: ATPase, AAA-type, core; IPR003960: ATPase, AAA-type, conserved site; IPR025753: AAA-type ATPase, N-terminal domain; IPR027417: P-loop containing nucleoside triphosphate hydrolase	-
Npp.01A004650.1	putative polyprotein	-	-	-	-	-	-
Npp.01A004660.1	uncharacterized protein LOC9269993; hypothetical protein OsI_29728	-	-	-	-	IPR022059: Protein of unknown function DUF3615	-
Npp.01A004670.1	pentatricopeptide repeat-containing protein At5g08510	Pentatricopeptide repeat-containing protein At1g08070, chloroplastic	Pentatricopeptide repeat-containing protein At1g08070, chloroplastic	-	GO:0005515: protein binding	IPR002885: Pentatricopeptide repeat; IPR011990: Tetratricopeptide-like helical domain superfamily	-
Npp.01A004680.1	LEAF RUST 10 DISEASE-RESISTANCE LOCUS RECEPTOR-LIKE PROTEIN KINASE-like 1.5	Probable LRR receptor-like serine/threonine-protein kinase At5g48740; Wall-associated receptor kinase-like 14	Probable LRR receptor-like serine/threonine-protein kinase At5g48740; Wall-associated receptor kinase-like 14	-	GO:0004672: protein kinase activity; GO:0005524: ATP binding; GO:0006468: protein phosphorylation	IPR000719: Protein kinase domain; IPR001245: Serine-threonine/tyrosine-protein kinase, catalytic domain; IPR008266: Tyrosine-protein kinase, active site; IPR011009: Protein kinase-like domain superfamily	-
Npp.01A004700.1	uncharacterized protein LOC9269993; hypothetical protein OsI_29728	-	-	-	-	IPR022059: Protein of unknown function DUF3615	-
Npp.01A004710.1	pentatricopeptide repeat-containing protein At5g08510	Pentatricopeptide repeat-containing protein At1g08070, chloroplastic	Pentatricopeptide repeat-containing protein At1g08070, chloroplastic	-	GO:0005515: protein binding	IPR002885: Pentatricopeptide repeat; IPR011990: Tetratricopeptide-like helical domain superfamily	-
Npp.01A004720.1	LEAF RUST 10 DISEASE-RESISTANCE LOCUS RECEPTOR-LIKE PROTEIN KINASE-like 1.5	Wall-associated receptor kinase-like 14	Wall-associated receptor kinase-like 14	-	GO:0004672: protein kinase activity; GO:0005524: ATP binding; GO:0006468: protein phosphorylation	IPR000719: Protein kinase domain; IPR008266: Tyrosine-protein kinase, active site; IPR011009: Protein kinase-like domain superfamily; IPR017441: Protein kinase, ATP binding site	-
Npp.01A004730.1	uncharacterized protein LOC110431735	-	-	-	-	IPR019275: Protein of unknown function DUF2301	-
Npp.01A004740.1	aspartokinase 2, chloroplastic	Aspartokinase 1, chloroplastic	Aspartokinase 1, chloroplastic	KOG0456: Aspartate kinase	GO:0004072: aspartate kinase activity; GO:0008652: cellular amino acid biosynthetic process	IPR001048: Aspartate/glutamate/uridylate kinase; IPR001341: Aspartate kinase; IPR002912: ACT domain; IPR018042: Aspartate kinase, conserved site; IPR036393: Acetylglutamate kinase-like superfamily; IPR042199: Aspartokinase/Bifunctional aspartokinase/homoserine dehydrogenase, catalytic domain	-
Npp.01A004750.1	-	-	-	-	GO:0005515: protein binding	IPR001660: Sterile alpha motif domain; IPR013761: Sterile alpha motif/pointed domain superfamily	-
Npp.01A004760.1	random slug protein 5	SEC14-like protein 2	SEC14-like protein 2	KOG1470: Phosphatidylinositol transfer protein PDR16 and related proteins	-	IPR001251: CRAL-TRIO lipid binding domain; IPR011074: CRAL/TRIO, N-terminal domain; IPR036273: CRAL/TRIO, N-terminal domain superfamily; IPR036865: CRAL-TRIO lipid binding domain superfamily	-
Npp.01A004780.1	uncharacterized protein LOC100277542 precursor	-	-	-	-	IPR038941: At4g14100-like	-
Npp.01A004790.1	basic transcription factor 3; Protein LURP-one-related 8	Basic transcription factor 3; Nascent polypeptide-associated complex subunit beta	Basic transcription factor 3; Nascent polypeptide-associated complex subunit beta	KOG2240: RNA polymerase II general transcription factor BTF3 and related proteins	-	IPR002715: Nascent polypeptide-associated complex NAC domain; IPR007612: LURP-one-related; IPR025659: Tubby-like, C-terminal; IPR038187: NAC A/B domain superfamily; IPR038595: LURP-one-related superfamily; IPR039370: Transcription factor BTF3	K01527: EGD1,BTF3;nascent polypeptide-associated complex subunit beta
Npp.01A004800.1	hypothetical protein SORBI_3001G011100	-	-	-	-	-	-
Npp.01A004810.1	elongation factor Tu, mitochondrial	Elongation factor Tu, mitochondrial	Elongation factor Tu, mitochondrial	KOG0460: Mitochondrial translation elongation factor Tu	-	-	K02358: tuf,TUFM;elongation factor Tu
Npp.01A004820.1	monothiol glutaredoxin-S7, chloroplastic	Monothiol glutaredoxin-S7, chloroplastic	Monothiol glutaredoxin-S7, chloroplastic	KOG0911: Glutaredoxin-related protein	GO:0009055: electron transfer activity; GO:0015035: protein disulfide oxidoreductase activity	IPR002109: Glutaredoxin; IPR004480: Monothiol glutaredoxin-related; IPR033658: Glutaredoxin, PICOT-like; IPR036249: Thioredoxin-like superfamily	K07390: grxD,GLRX5;monothiol glutaredoxin
Npp.01A004830.1	26S proteasome non-ATPase regulatory subunit 12 homolog A; hypothetical protein GQ55_9G008600	26S proteasome non-ATPase regulatory subunit 12 homolog A	26S proteasome non-ATPase regulatory subunit 12 homolog A	KOG1498: 26S proteasome regulatory complex, subunit RPN5/PSMD12	-	IPR000717: Proteasome component (PCI) domain; IPR001005: SANT/Myb domain; IPR009057: Homeobox-like domain superfamily; IPR017930: Myb domain; IPR036388: Winged helix-like DNA-binding domain superfamily; IPR036390: Winged helix DNA-binding domain superfamily; IPR040134: 26S Proteasome non-ATPase regulatory subunit 12/COP9 signalosome complex subunit 4; IPR040896: 26S proteasome regulatory subunit …	K03035: PSMD12,RPN5;26S proteasome regulatory subunit N5
Npp.01A004840.1	E3 ubiquitin protein ligase DRIP2	E3 ubiquitin protein ligase DRIP2; Polycomb group RING finger protein 1	E3 ubiquitin protein ligase DRIP2; Polycomb group RING finger protein 1	KOG2660: Locus-specific chromosome binding proteins	GO:0046872: metal ion binding	IPR001841: Zinc finger, RING-type; IPR013083: Zinc finger, RING/FYVE/PHD-type; IPR017907: Zinc finger, RING-type, conserved site; IPR018957: Zinc finger, C3HC4 RING-type	K16277: DRIP;E3 ubiquitin-protein ligase DRIP [EC:2.3.2.27]
Npp.01A004850.1	DNA (cytosine-5)-methyltransferase 1A	DNA (cytosine-5)-methyltransferase 1A	DNA (cytosine-5)-methyltransferase 1A	-	GO:0003682: chromatin binding; GO:0003886: DNA (cytosine-5-)-methyltransferase activity; GO:0005634: nucleus; GO:0090116: C-5 methylation of cytosine	IPR001025: Bromo adjacent homology (BAH) domain; IPR001525: C-5 cytosine methyltransferase; IPR017198: DNA (cytosine-5)-methyltransferase 1-like; IPR018117: DNA methylase, C-5 cytosine-specific, active site; IPR022702: DNA (cytosine-5)-methyltransferase 1, replication foci domain; IPR029063: S-adenosyl-L-methionine-dependent methyltransferase; IPR031303: DNA methylase, C-5 cytosine-specific, cons…	-
Npp.01A004860.1	PRA1 family protein E	PRA1 family protein E	PRA1 family protein E	KOG3142: Prenylated rab acceptor 1	-	IPR004895: Prenylated rab acceptor PRA1	K20359: RABAC1,PRAF1;PRA1 family protein 1
Npp.01A004870.1	protein WRKY1	Probable WRKY transcription factor 7	Probable WRKY transcription factor 7	-	GO:0003700: DNA binding transcription factor activity; GO:0006355: regulation of transcription, DNA-templated; GO:0043565: sequence-specific DNA binding	IPR003657: WRKY domain; IPR018872: Zn-cluster domain; IPR036576: WRKY domain superfamily	-
Npp.01A004880.1	hypothetical protein SORBI_3001G055300	-	-	-	-	-	-
Npp.01A004890.1	hypothetical protein SORBI_3001G055100	-	-	-	-	-	-
Npp.01A004900.1	40S ribosomal protein S15	40S ribosomal protein S15	40S ribosomal protein S15	KOG0898: 40S ribosomal protein S15	GO:0003723: RNA binding; GO:0003735: structural constituent of ribosome; GO:0005840: ribosome; GO:0006412: translation; GO:0015935: small ribosomal subunit	IPR002222: Ribosomal protein S19/S15; IPR005713: Ribosomal protein S19A/S15e; IPR020934: Ribosomal protein S19 conserved site; IPR023575: Ribosomal protein S19, superfamily	K02958: RP-S15e,RPS15;small subunit ribosomal protein S15e
Npp.01A004910.1	histone H1	-	-	-	GO:0000786: nucleosome; GO:0003677: DNA binding; GO:0006334: nucleosome assembly; GO:0042025: host cell nucleus	IPR005818: Linker histone H1/H5, domain H15; IPR005819: Linker histone H1/H5; IPR036388: Winged helix-like DNA-binding domain superfamily; IPR036390: Winged helix DNA-binding domain superfamily	K11275: H1_5;histone H1/5
Npp.01A004920.1	protein WVD2-like 1 isoform X1	Protein WVD2-like 3	Protein WVD2-like 3	-	-	IPR027329: TPX2, C-terminal	-
Npp.01A004930.1	probable myosin-binding protein 5	Probable myosin-binding protein 5	Probable myosin-binding protein 5	-	GO:0017022: myosin binding	IPR007656: GTD-binding domain; IPR039306: Myosin-binding protein	-
Npp.01A004950.1	protein RTE1-HOMOLOG	Transmembrane protein 222	Transmembrane protein 222	KOG3150: Uncharacterized conserved protein	-	IPR008496: TMEM222/RTE1	K20726: TMEM222;transmembrane protein 222
Npp.01A004960.1	probable GTP-binding protein OBGC2	GTPase Obg	GTPase Obg	KOG1489: Predicted GTP-binding protein (ODN superfamily); KOG1491: Predicted GTP-binding protein (ODN superfamily)	GO:0005525: GTP binding	IPR005225: Small GTP-binding protein domain; IPR006073: GTP binding domain; IPR006074: GTP1/OBG, conserved site; IPR006169: GTP1/OBG domain; IPR027417: P-loop containing nucleoside triphosphate hydrolase; IPR031167: OBG-type guanine nucleotide-binding (G) domain; IPR036726: GTP1/OBG domain superfamily	-
Npp.01A004970.1	histone H1	-	-	-	GO:0000786: nucleosome; GO:0003677: DNA binding; GO:0006334: nucleosome assembly; GO:0042025: host cell nucleus	IPR005818: Linker histone H1/H5, domain H15; IPR005819: Linker histone H1/H5; IPR036388: Winged helix-like DNA-binding domain superfamily; IPR036390: Winged helix DNA-binding domain superfamily	K11275: H1_5;histone H1/5
Npp.01A004980.1	probable GTP-binding protein OBGC2	GTPase Obg	GTPase Obg	KOG1489: Predicted GTP-binding protein (ODN superfamily); KOG1491: Predicted GTP-binding protein (ODN superfamily)	GO:0005525: GTP binding	IPR005225: Small GTP-binding protein domain; IPR006073: GTP binding domain; IPR006074: GTP1/OBG, conserved site; IPR006169: GTP1/OBG domain; IPR027417: P-loop containing nucleoside triphosphate hydrolase; IPR031167: OBG-type guanine nucleotide-binding (G) domain; IPR036726: GTP1/OBG domain superfamily	-
Npp.01A004990.1	SEC12-like protein 1	Prolactin regulatory element-binding protein; SEC12-like protein 1	Prolactin regulatory element-binding protein; SEC12-like protein 1	KOG0771: Prolactin regulatory element-binding protein/Protein transport protein SEC12p	GO:0005515: protein binding	IPR001680: WD40 repeat; IPR015943: WD40/YVTN repeat-like-containing domain superfamily; IPR017986: WD40-repeat-containing domain; IPR019775: WD40 repeat, conserved site; IPR036322: WD40-repeat-containing domain superfamily	K14003: PREB,SEC12;prolactin regulatory element-binding protein
Npp.01A005000.1	IAA14 - auxin-responsive Aux/IAA family member	Auxin-responsive protein IAA14	Auxin-responsive protein IAA14	-	GO:0005515: protein binding; GO:0005634: nucleus; GO:0006355: regulation of transcription, DNA-templated	IPR000270: PB1 domain; IPR003311: AUX/IAA protein; IPR033389: AUX/IAA domain	K14484: IAA;auxin-responsive protein IAA
Npp.01A005010.1	rRNA-processing protein EFG1	-	-	KOG4484: Uncharacterized conserved protein	GO:0006364: rRNA processing	IPR019310: rRNA-processing protein Efg1	-
Npp.01A005020.1	uncharacterized protein LOC101757873 isoform X2; hypothetical protein SETIT_8G204400v2	-	-	-	-	IPR009003: Peptidase S1, PA clan; IPR043504: Peptidase S1, PA clan, chymotrypsin-like fold	-
Npp.01A005030.1	uncharacterized protein LOC107278842	-	-	-	-	-	-
Npp.01A005040.1	uncharacterized protein LOC101757873 isoform X1	-	-	-	-	IPR009003: Peptidase S1, PA clan	-
Npp.01A005050.1	transcription factor UNE12-like isoform X2	Transcription factor UNE12	Transcription factor UNE12	-	GO:0046983: protein dimerization activity	IPR011598: Myc-type, basic helix-loop-helix (bHLH) domain; IPR036638: Helix-loop-helix DNA-binding domain superfamily	-
Npp.01A005060.1	indole-3-glycerol phosphate lyase, chloroplastic	Tryptophan synthase alpha chain, chloroplastic	Tryptophan synthase alpha chain, chloroplastic	KOG4175: Tryptophan synthase alpha chain	GO:0004834: tryptophan synthase activity; GO:0006568: tryptophan metabolic process	IPR002028: Tryptophan synthase, alpha chain; IPR011060: Ribulose-phosphate binding barrel; IPR013785: Aldolase-type TIM barrel; IPR018204: Tryptophan synthase, alpha chain, active site	K13222: BX1,IGL;indole-3-glycerol-phosphate lyase [EC:4.1.2.8]
Npp.01A005070.1	Indole-3-glycerol phosphate lyase, chloroplastic	Tryptophan synthase alpha chain	Tryptophan synthase alpha chain	KOG4175: Tryptophan synthase alpha chain	GO:0004834: tryptophan synthase activity; GO:0006568: tryptophan metabolic process	IPR002028: Tryptophan synthase, alpha chain; IPR011060: Ribulose-phosphate binding barrel; IPR013785: Aldolase-type TIM barrel; IPR018204: Tryptophan synthase, alpha chain, active site	K13222: BX1,IGL;indole-3-glycerol-phosphate lyase [EC:4.1.2.8]
Npp.01A005090.1	tryptophan synthase alpha chain, chloroplastic isoform X2	Tryptophan synthase alpha chain, chloroplastic	Tryptophan synthase alpha chain, chloroplastic	KOG4175: Tryptophan synthase alpha chain	GO:0004834: tryptophan synthase activity; GO:0006568: tryptophan metabolic process	IPR002028: Tryptophan synthase, alpha chain; IPR011060: Ribulose-phosphate binding barrel; IPR013785: Aldolase-type TIM barrel; IPR018204: Tryptophan synthase, alpha chain, active site	K01695: trpA;tryptophan synthase alpha chain [EC:4.2.1.20]
Npp.01A005100.1	opaque-2 heterodimerizing protein 1b	bZIP transcription factor RISBZ2; Basic leucine zipper 63	bZIP transcription factor RISBZ2; Basic leucine zipper 63	-	GO:0003700: DNA binding transcription factor activity; GO:0006355: regulation of transcription, DNA-templated	IPR004827: Basic-leucine zipper domain; IPR020983: Basic leucine-zipper, C-terminal	-
Npp.01A005110.1	guanylate-binding protein 4 isoform X2	Guanylate-binding protein 4	Guanylate-binding protein 4	KOG2037: Guanylate-binding protein	GO:0003924: GTPase activity; GO:0005525: GTP binding	IPR003191: Guanylate-binding protein/Atlastin, C-terminal; IPR015894: Guanylate-binding protein, N-terminal; IPR027417: P-loop containing nucleoside triphosphate hydrolase; IPR030386: GB1/RHD3-type guanine nucleotide-binding (G) domain; IPR036543: Guanylate-binding protein, C-terminal domain superfamily	-
Npp.01A005120.1	hypothetical protein C2845_PM17G06120; uncharacterized protein LOC112903102	-	-	-	GO:0006508: proteolysis; GO:0008234: cysteine-type peptidase activity	IPR003653: Ulp1 protease family, C-terminal catalytic domain; IPR038765: Papain-like cysteine peptidase superfamily	-
Npp.01A005130.1	protein FAR1-RELATED SEQUENCE 5; hypothetical protein SORBI_3003G198000, partial	Protein FAR1-RELATED SEQUENCE 5	Protein FAR1-RELATED SEQUENCE 5	-	GO:0006355: regulation of transcription, DNA-templated; GO:0008270: zinc ion binding	IPR004330: FAR1 DNA binding domain; IPR006564: Zinc finger, PMZ-type; IPR007527: Zinc finger, SWIM-type; IPR018289: MULE transposase domain; IPR031052: FHY3/FAR1 family	-
Npp.01A005140.1	uncharacterized protein LOC8081257	-	-	-	-	IPR006502: Protein of unknown function PDDEXK-like	-
Npp.01A005160.1	pyruvate kinase isozyme A, chloroplastic	Pyruvate kinase isozyme A, chloroplastic	Pyruvate kinase isozyme A, chloroplastic	KOG2323: Pyruvate kinase	GO:0000287: magnesium ion binding; GO:0004743: pyruvate kinase activity; GO:0006096: glycolytic process; GO:0030955: potassium ion binding	IPR001697: Pyruvate kinase; IPR006660: Arsenate reductase-like; IPR011037: Pyruvate kinase-like, insert domain superfamily; IPR015793: Pyruvate kinase, barrel; IPR015795: Pyruvate kinase, C-terminal; IPR015806: Pyruvate kinase, insert domain superfamily; IPR015813: Pyruvate/Phosphoenolpyruvate kinase-like domain superfamily; IPR018209: Pyruvate kinase, active site; IPR036918: Pyruvate kinase, C-t…	K00873: PK,pyk;pyruvate kinase [EC:2.7.1.40]
Npp.01A005170.1	60S ribosomal protein L4-1	60S ribosomal protein L4	60S ribosomal protein L4	KOG1475: Ribosomal protein RPL1/RPL2/RL4L4	GO:0003735: structural constituent of ribosome; GO:0005840: ribosome; GO:0006412: translation	IPR002136: Ribosomal protein L4/L1e; IPR023574: Ribosomal protein L4 domain superfamily; IPR025755: 60S ribosomal protein L4, C-terminal domain	K02930: RP-L4e,RPL4;large subunit ribosomal protein L4e
Npp.01A005180.1	uncharacterized protein LOC8061171	-	-	-	-	IPR005491: ENT domain; IPR036142: ENT domain-like superfamily	-
Npp.01A005190.1	WW domain-binding protein 11; hypothetical protein BAE44_0002655	-	-	-	-	-	-
Npp.01A005200.1	hypothetical protein SORBI_3003G344050, partial	-	-	-	-	IPR029466: No apical meristem-associated, C-terminal domain	-
Npp.01A005210.1	stem-specific protein TSJT1-like	-	-	-	-	IPR024286: Domain of unknown function DUF3700; IPR029055: Nucleophile aminohydrolases, N-terminal	-
Npp.01A005230.1	BI1-like protein	Protein lifeguard 4	Protein lifeguard 4	KOG2322: N-methyl-D-aspartate receptor glutamate-binding subunit	-	IPR006214: Bax inhibitor 1-related	K24205: TMBIM,LFG;protein lifeguard
Npp.01A005240.1	BI1-like protein	Protein lifeguard 1; Protein LIFEGUARD 4	Protein lifeguard 1; Protein LIFEGUARD 4	KOG2322: N-methyl-D-aspartate receptor glutamate-binding subunit	-	IPR006214: Bax inhibitor 1-related	K24205: TMBIM,LFG;protein lifeguard
Npp.01A005250.1	PITH domain-containing protein At3g04780	PITH domain-containing protein At3g04780; Thioredoxin-like protein 1	PITH domain-containing protein At3g04780; Thioredoxin-like protein 1	KOG0908: Thioredoxin-like protein; KOG1730: Thioredoxin-like protein	-	IPR008979: Galactose-binding-like domain superfamily; IPR010400: PITH domain; IPR037047: PITH domain superfamily	-
Npp.01A005260.1	pentatricopeptide repeat-containing protein At1g63130, mitochondrial	-	-	-	GO:0005515: protein binding	IPR002885: Pentatricopeptide repeat; IPR011990: Tetratricopeptide-like helical domain superfamily	-
Npp.01A005270.1	uncharacterized protein LOC8063854 isoform X1	Retrovirus-related Pol polyprotein from transposon RE1	Retrovirus-related Pol polyprotein from transposon RE1	-	-	IPR043502: DNA/RNA polymerase superfamily	-
Npp.01A005280.1	DNA primase small subunit-like; hypothetical protein GQ55_5G173500	DNA primase small subunit	DNA primase small subunit	KOG2851: Eukaryotic-type DNA primase, catalytic (small) subunit	GO:0003896: DNA primase activity; GO:0006269: DNA replication, synthesis of RNA primer	IPR002755: DNA primase, small subunit; IPR014052: DNA primase, small subunit, eukaryotic/archaeal	-
Npp.01A005290.1	leucine-rich repeat extensin-like protein 6	Leucine-rich repeat extensin-like protein 6	Leucine-rich repeat extensin-like protein 6	-	-	-	-
Npp.01A005300.1	pentatricopeptide repeat-containing protein At2g02980, chloroplastic	Pentatricopeptide repeat-containing protein At2g02980, chloroplastic	Pentatricopeptide repeat-containing protein At2g02980, chloroplastic	-	GO:0005515: protein binding; GO:0008270: zinc ion binding	IPR002885: Pentatricopeptide repeat; IPR011990: Tetratricopeptide-like helical domain superfamily; IPR032867: DYW domain	-
Npp.01A005310.1	folate-biopterin transporter 1, chloroplastic	Folate-biopterin transporter 1, chloroplastic	Folate-biopterin transporter 1, chloroplastic	-	GO:0016021: integral component of membrane	IPR004324: Folate-biopterin transporter; IPR036259: MFS transporter superfamily; IPR039309: Biopterin transporter family	-
Npp.01A005320.1	5&apos;-3&apos; exoribonuclease 4; hypothetical protein GQ55_9G053000	5&apos;-3&apos; exoribonuclease 4	5&apos;-3&apos; exoribonuclease 4	KOG2044: 5'-3' exonuclease HKE1/RAT1; KOG2045: 5'-3' exonuclease XRN1/KEM1/SEP1 involved in DNA strand exchange and mRNA turnover	GO:0003676: nucleic acid binding; GO:0004534: 5'-3' exoribonuclease activity; GO:0005634: nucleus; GO:0006139: nucleobase-containing compound metabolic process; GO:0008270: zinc ion binding	IPR001878: Zinc finger, CCHC-type; IPR004859: Putative 5-3 exonuclease; IPR017151: 5'-3' exoribonuclease type 2; IPR027073: 5'-3' exoribonuclease; IPR036875: Zinc finger, CCHC-type superfamily; IPR041412: Xrn1, helical domain	K20553: XRN4;5'-3' exoribonuclease 4 [EC:3.1.13.-]
Npp.01A005350.1	uncharacterized protein LOC110433110; hypothetical protein SORBI_3007G112832	-	-	-	-	-	-
Npp.01A005370.1	uncharacterized protein LOC110433110; hypothetical protein SORBI_3007G112832	-	-	-	-	-	-
Npp.01A005380.1	uncharacterized protein LOC8062730; hypothetical protein SORBI_3002G212900, partial	-	-	-	-	-	-
Npp.01A005390.1	Cysteine proteinase EP-B 2	Cysteine proteinase EP-B 2	Cysteine proteinase EP-B 2	-	GO:0006508: proteolysis; GO:0008234: cysteine-type peptidase activity	IPR000169: Cysteine peptidase, cysteine active site; IPR000668: Peptidase C1A, papain C-terminal; IPR013201: Cathepsin propeptide inhibitor domain (I29); IPR025660: Cysteine peptidase, histidine active site; IPR025661: Cysteine peptidase, asparagine active site; IPR038765: Papain-like cysteine peptidase superfamily; IPR039417: Papain-like cysteine endopeptidase	-
Npp.01A005400.1	tetratricopeptide repeat protein 1	Mitochondrial import receptor subunit TOM34; Tetratricopeptide repeat protein 1	Mitochondrial import receptor subunit TOM34; Tetratricopeptide repeat protein 1	KOG0547: Translocase of outer mitochondrial membrane complex, subunit TOM70/TOM72; KOG4234: TPR repeat-containing protein	-	-	-
Npp.01A005410.1	40S ribosomal protein S18	40S ribosomal protein S18	40S ribosomal protein S18	KOG3311: Ribosomal protein S18	GO:0003723: RNA binding; GO:0003735: structural constituent of ribosome; GO:0005840: ribosome; GO:0006412: translation	IPR001892: Ribosomal protein S13; IPR010979: Ribosomal protein S13-like, H2TH; IPR018269: Ribosomal protein S13, conserved site; IPR027437: 30s ribosomal protein S13, C-terminal	K02964: RP-S18e,RPS18;small subunit ribosomal protein S18e
Npp.01A005420.1	glutamate dehydrogenase	Glutamate dehydrogenase	Glutamate dehydrogenase	KOG2250: Glutamate/leucine/phenylalanine/valine dehydrogenases	GO:0006520: cellular amino acid metabolic process; GO:0016639: oxidoreductase activity, acting on the CH-NH2 group of donors, NAD or NADP as acceptor; GO:0055114: oxidation-reduction process	IPR006095: Glutamate/phenylalanine/leucine/valine dehydrogenase; IPR006096: Glutamate/phenylalanine/leucine/valine dehydrogenase, C-terminal; IPR006097: Glutamate/phenylalanine/leucine/valine dehydrogenase, dimerisation domain; IPR014362: Glutamate dehydrogenase; IPR033524: Leu/Phe/Val dehydrogenases active site; IPR033922: NAD(P) binding domain of glutamate dehydrogenase; IPR036291: NAD(P)-bindi…	K00261: GLUD1_2,gdhA;glutamate dehydrogenase (NAD(P)+) [EC:1.4.1.3]
Npp.01A005430.1	uncharacterized protein LOC8081267; hypothetical protein GQ55_9G053300	Uncharacterized N-acetyltransferase p20	Uncharacterized N-acetyltransferase p20	-	GO:0008080: N-acetyltransferase activity	IPR000182: GNAT domain; IPR016181: Acyl-CoA N-acyltransferase	-
Npp.01A005440.1	uncharacterized protein LOC103625815	Uncharacterized N-acetyltransferase p20	Uncharacterized N-acetyltransferase p20	-	-	-	-
Npp.01A005450.1	uncharacterized protein LOC8081268	Uncharacterized N-acetyltransferase p20	Uncharacterized N-acetyltransferase p20	-	GO:0008080: N-acetyltransferase activity	IPR000182: GNAT domain; IPR016181: Acyl-CoA N-acyltransferase	-
Npp.01A005460.1	non-specific lipid transfer protein GPI-anchored 2	-	-	-	-	IPR016140: Bifunctional inhibitor/plant lipid transfer protein/seed storage helical domain; IPR036312: Bifunctional inhibitor/plant lipid transfer protein/seed storage helical domain superfamily; IPR043325: Alpha-Amylase Inhibitors (AAI), Lipid Transfer (LT) and Seed Storage (SS) Protein	-
Npp.01A005470.1	protein FLUORESCENT IN BLUE LIGHT, chloroplastic isoform X1	-	-	-	-	-	-
Npp.01A005480.1	non-specific lipid-transfer protein-like protein At2g13820; hypothetical protein GQ55_9G053900	-	-	-	-	IPR016140: Bifunctional inhibitor/plant lipid transfer protein/seed storage helical domain; IPR036312: Bifunctional inhibitor/plant lipid transfer protein/seed storage helical domain superfamily; IPR043325: Alpha-Amylase Inhibitors (AAI), Lipid Transfer (LT) and Seed Storage (SS) Protein	-
Npp.01A005490.1	non-specific lipid-transfer protein-like protein At2g13820	Non-specific lipid transfer protein GPI-anchored 2	Non-specific lipid transfer protein GPI-anchored 2	-	GO:0006869: lipid transport; GO:0008289: lipid binding	IPR000528: Plant lipid transfer protein/Par allergen; IPR016140: Bifunctional inhibitor/plant lipid transfer protein/seed storage helical domain; IPR036312: Bifunctional inhibitor/plant lipid transfer protein/seed storage helical domain superfamily; IPR043325: Alpha-Amylase Inhibitors (AAI), Lipid Transfer (LT) and Seed Storage (SS) Protein	-
Npp.01A005500.1	cupincin	Conglutin beta 3	Conglutin beta 3	-	GO:0045735: nutrient reservoir activity	IPR006045: Cupin 1; IPR011051: RmlC-like cupin domain superfamily; IPR014710: RmlC-like jelly roll fold	-
Npp.01A005510.1	cupincin	-	-	-	GO:0045735: nutrient reservoir activity	IPR006045: Cupin 1; IPR011051: RmlC-like cupin domain superfamily; IPR014710: RmlC-like jelly roll fold	-
Npp.01A005520.1	type I inositol polyphosphate 5-phosphatase 4	Type I inositol polyphosphate 5-phosphatase 4	Type I inositol polyphosphate 5-phosphatase 4	KOG0566: Inositol-1,4,5-triphosphate 5-phosphatase (synaptojanin), INP51/INP52/INP53 family	-	-	-
Npp.01A005530.1	uncharacterized protein C2845_PM01G23900; hypothetical protein BAE44_0002675	-	-	-	-	IPR012871: Protein of unknown function DUF1677, Oryza sativa	K13427: NOA1;nitric-oxide synthase,plant [EC:1.14.13.39]
Npp.01A005540.1	hypothetical protein C2845_PM02G45200; uncharacterized protein C2845_PM01G23900	-	-	-	-	IPR012871: Protein of unknown function DUF1677, Oryza sativa	-
Npp.01A005550.1	hypothetical protein BAE44_0002675	-	-	-	-	IPR012871: Protein of unknown function DUF1677, Oryza sativa	-
Npp.01A005560.1	casein kinase 1-like protein HD16	Casein kinase 1-like protein HD16	Casein kinase 1-like protein HD16	-	GO:0004672: protein kinase activity; GO:0005524: ATP binding; GO:0006468: protein phosphorylation	IPR000719: Protein kinase domain; IPR008271: Serine/threonine-protein kinase, active site; IPR011009: Protein kinase-like domain superfamily; IPR017441: Protein kinase, ATP binding site	-
Npp.01A005570.1	casein kinase 1-like protein HD16	Casein kinase 1-like protein HD16	Casein kinase 1-like protein HD16	-	GO:0004672: protein kinase activity; GO:0005524: ATP binding; GO:0006468: protein phosphorylation	IPR000719: Protein kinase domain; IPR008271: Serine/threonine-protein kinase, active site; IPR011009: Protein kinase-like domain superfamily; IPR017441: Protein kinase, ATP binding site	-
Npp.01A005580.1	uncharacterized protein LOC8081273; hypothetical protein Zm00014a_029664	-	-	-	-	-	-
Npp.01A005590.1	uncharacterized protein LOC110433757 isoform X1	-	-	-	GO:0005515: protein binding	IPR001810: F-box domain; IPR032675: Leucine-rich repeat domain superfamily; IPR036047: F-box-like domain superfamily	-
Npp.01A005600.1	hypothetical protein; uncharacterized protein LOC110433661	-	-	-	-	IPR004252: Probable transposase, Ptta/En/Spm, plant	-
Npp.01A005610.1	YTH domain-containing family protein 2, partial	YTH domain-containing protein ECT4	YTH domain-containing protein ECT4	KOG1901: Uncharacterized high-glucose-regulated protein; KOG1902: Putative signal transduction protein involved in RNA splicing	GO:0003723: RNA binding	IPR007275: YTH domain	K20102: YTHDF;YTH domain-containing family protein
Npp.01A005620.1	putative cyclin-dependent kinase F-2	Putative cyclin-dependent kinase F-2	Putative cyclin-dependent kinase F-2	KOG0663: Protein kinase PITSLRE and related kinases	GO:0004672: protein kinase activity; GO:0005524: ATP binding; GO:0006468: protein phosphorylation	IPR000719: Protein kinase domain; IPR008271: Serine/threonine-protein kinase, active site; IPR011009: Protein kinase-like domain superfamily	-
Npp.01A005630.1	hypothetical protein ZEAMMB73_Zm00001d010547; uncharacterized protein LOC8068106	-	-	-	GO:0003676: nucleic acid binding; GO:0008270: zinc ion binding	IPR001878: Zinc finger, CCHC-type; IPR026960: Reverse transcriptase zinc-binding domain; IPR036875: Zinc finger, CCHC-type superfamily	-
Npp.01A005640.1	putative cyclin-dependent kinase F-2	Putative cyclin-dependent kinase F-2	Putative cyclin-dependent kinase F-2	-	GO:0004672: protein kinase activity; GO:0005524: ATP binding; GO:0006468: protein phosphorylation	IPR000719: Protein kinase domain; IPR008271: Serine/threonine-protein kinase, active site; IPR011009: Protein kinase-like domain superfamily; IPR017441: Protein kinase, ATP binding site	K02206: CDK2;cyclin-dependent kinase 2 [EC:2.7.11.22]
Npp.01A005650.1	mavicyanin-like; basic blue protein-like	Uclacyanin 1; Early nodulin-like protein 2	Uclacyanin 1; Early nodulin-like protein 2	-	GO:0009055: electron transfer activity	IPR003245: Phytocyanin domain; IPR008972: Cupredoxin; IPR039391: Phytocyanin	-
Npp.01A005660.1	basic blue protein; Mavicyanin	Uclacyanin 1	Uclacyanin 1	-	GO:0009055: electron transfer activity	IPR003245: Phytocyanin domain; IPR008972: Cupredoxin; IPR039391: Phytocyanin	-
Npp.01A005670.1	25.3 kDa vesicle transport protein	25.3 kDa vesicle transport protein	25.3 kDa vesicle transport protein	KOG0861: SNARE protein YKT6, synaptobrevin/VAMP syperfamily; KOG0862: Synaptobrevin/VAMP-like protein SEC22	-	-	K08517: SEC22;vesicle transport protein SEC22
Npp.01A005690.1	probable inactive leucine-rich repeat receptor-like protein kinase At3g03770; hypothetical protein PAHAL_9G056700	Probable inactive leucine-rich repeat receptor-like protein kinase At3g03770	Probable inactive leucine-rich repeat receptor-like protein kinase At3g03770	-	GO:0004672: protein kinase activity; GO:0005515: protein binding; GO:0005524: ATP binding; GO:0006468: protein phosphorylation	IPR000719: Protein kinase domain; IPR001245: Serine-threonine/tyrosine-protein kinase, catalytic domain; IPR001611: Leucine-rich repeat; IPR011009: Protein kinase-like domain superfamily; IPR032675: Leucine-rich repeat domain superfamily	-
Npp.01A005700.1	PREDICTED: ubiquitin-conjugating enzyme E2 2	Ubiquitin-conjugating enzyme E2 2	Ubiquitin-conjugating enzyme E2 2	KOG0419: Ubiquitin-protein ligase	-	IPR000608: Ubiquitin-conjugating enzyme E2; IPR016135: Ubiquitin-conjugating enzyme/RWD-like; IPR023313: Ubiquitin-conjugating enzyme, active site	K10573: UBE2A,UBC2,RAD6A;ubiquitin-conjugating enzyme E2 A [EC:2.3.2.23]
Npp.01A005710.1	putative zinc metalloprotease EGY1 chloroplastic	Probable zinc metalloprotease EGY1, chloroplastic	Probable zinc metalloprotease EGY1, chloroplastic	-	-	-	-
Npp.01A005720.1	BTB/POZ and MATH domain-containing protein 5	Speckle-type POZ protein; BTB/POZ and MATH domain-containing protein 4	Speckle-type POZ protein; BTB/POZ and MATH domain-containing protein 4	KOG4350: Uncharacterized conserved protein, contains BTB/POZ domain	GO:0005515: protein binding	IPR000210: BTB/POZ domain; IPR002083: MATH/TRAF domain; IPR008974: TRAF-like; IPR011333: SKP1/BTB/POZ domain superfamily; IPR034090: BPM, C-terminal	K10523: SPOP;speckle-type POZ protein
Npp.01A005730.1	replication factor C subunit 5	Replication factor C subunit 5	Replication factor C subunit 5	KOG0991: Replication factor C, subunit RFC2; KOG2035: Replication factor C, subunit RFC3	GO:0003677: DNA binding; GO:0006260: DNA replication	IPR003593: AAA+ ATPase domain; IPR008921: DNA polymerase III, clamp loader complex, gamma/delta/delta subunit, C-terminal; IPR027417: P-loop containing nucleoside triphosphate hydrolase	K10756: RFC3_5;replication factor C subunit 3/5
Npp.01A005740.1	glucan endo-1,3-beta-glucosidase 8	Glucan endo-1,3-beta-glucosidase 8	Glucan endo-1,3-beta-glucosidase 8	-	GO:0004553: hydrolase activity, hydrolyzing O-glycosyl compounds; GO:0005975: carbohydrate metabolic process	IPR000490: Glycoside hydrolase family 17; IPR012946: X8 domain; IPR017853: Glycoside hydrolase superfamily	-
Npp.01A005750.1	basic blue protein; hypothetical protein SORBI_3001G062066	Uclacyanin-3	Uclacyanin-3	-	GO:0009055: electron transfer activity	IPR003245: Phytocyanin domain; IPR008972: Cupredoxin; IPR039391: Phytocyanin	-
Npp.01A005760.1	basic blue protein; hypothetical protein SORBI_3001G062066	Chemocyanin	Chemocyanin	-	GO:0009055: electron transfer activity	IPR003245: Phytocyanin domain; IPR008972: Cupredoxin; IPR039391: Phytocyanin	-
Npp.01A005770.1	basic blue protein; hypothetical protein SORBI_3001G062132	Uclacyanin-3; Basic blue protein	Uclacyanin-3; Basic blue protein	-	GO:0009055: electron transfer activity	IPR003245: Phytocyanin domain; IPR008972: Cupredoxin; IPR039391: Phytocyanin	-
Npp.01A005790.1	basic blue protein; hypothetical protein SORBI_3001G062132	Chemocyanin; Basic blue protein	Chemocyanin; Basic blue protein	-	GO:0009055: electron transfer activity	IPR003245: Phytocyanin domain; IPR006311: Twin-arginine translocation pathway, signal sequence; IPR008972: Cupredoxin; IPR039391: Phytocyanin	-
Npp.01A005800.1	hypothetical protein SORBI_3006G107332	-	-	-	-	-	-
Npp.01A005810.1	zinc finger A20 and AN1 domain-containing stress-associated protein 7; hypothetical protein GQ55_9G055900	Zinc finger A20 and AN1 domain-containing stress-associated protein 7	Zinc finger A20 and AN1 domain-containing stress-associated protein 7	KOG3173: Predicted Zn-finger protein	GO:0003677: DNA binding; GO:0008270: zinc ion binding	IPR000058: Zinc finger, AN1-type; IPR002653: Zinc finger, A20-type; IPR035896: AN1-like Zinc finger	-
Npp.01A005820.1	indole-3-acetaldehyde oxidase isoform X1	Indole-3-acetaldehyde oxidase; Xanthine dehydrogenase/oxidase	Indole-3-acetaldehyde oxidase; Xanthine dehydrogenase/oxidase	KOG0430: Xanthine dehydrogenase	GO:0005506: iron ion binding; GO:0009055: electron transfer activity; GO:0051537: 2 iron, 2 sulfur cluster binding; GO:0055114: oxidation-reduction process; GO:0071949: FAD binding	IPR000674: Aldehyde oxidase/xanthine dehydrogenase, a/b hammerhead; IPR001041: 2Fe-2S ferredoxin-type iron-sulfur binding domain; IPR002346: Molybdopterin dehydrogenase, FAD-binding; IPR002888: [2Fe-2S]-binding; IPR005107: CO dehydrogenase flavoprotein, C-terminal; IPR006058: 2Fe-2S ferredoxin, iron-sulphur binding site; IPR008274: Aldehyde oxidase/xanthine dehydrogenase, molybdopterin binding; I…	K11817: AAO1_2;indole-3-acetaldehyde oxidase [EC:1.2.3.7]
Npp.01A005830.1	indole-3-acetaldehyde oxidase	Indole-3-acetaldehyde oxidase; Xanthine dehydrogenase/oxidase	Indole-3-acetaldehyde oxidase; Xanthine dehydrogenase/oxidase	KOG0430: Xanthine dehydrogenase	GO:0005506: iron ion binding; GO:0009055: electron transfer activity; GO:0051537: 2 iron, 2 sulfur cluster binding; GO:0055114: oxidation-reduction process; GO:0071949: FAD binding	IPR000674: Aldehyde oxidase/xanthine dehydrogenase, a/b hammerhead; IPR001041: 2Fe-2S ferredoxin-type iron-sulfur binding domain; IPR002346: Molybdopterin dehydrogenase, FAD-binding; IPR002888: [2Fe-2S]-binding; IPR005107: CO dehydrogenase flavoprotein, C-terminal; IPR006058: 2Fe-2S ferredoxin, iron-sulphur binding site; IPR008274: Aldehyde oxidase/xanthine dehydrogenase, molybdopterin binding; I…	K11817: AAO1_2;indole-3-acetaldehyde oxidase [EC:1.2.3.7]
Npp.01A005840.1	indole-3-acetaldehyde oxidase	Indole-3-acetaldehyde oxidase; Xanthine dehydrogenase/oxidase	Indole-3-acetaldehyde oxidase; Xanthine dehydrogenase/oxidase	KOG0430: Xanthine dehydrogenase	GO:0005506: iron ion binding; GO:0009055: electron transfer activity; GO:0051537: 2 iron, 2 sulfur cluster binding; GO:0055114: oxidation-reduction process; GO:0071949: FAD binding	IPR000674: Aldehyde oxidase/xanthine dehydrogenase, a/b hammerhead; IPR001041: 2Fe-2S ferredoxin-type iron-sulfur binding domain; IPR002346: Molybdopterin dehydrogenase, FAD-binding; IPR002888: [2Fe-2S]-binding; IPR005107: CO dehydrogenase flavoprotein, C-terminal; IPR006058: 2Fe-2S ferredoxin, iron-sulphur binding site; IPR008274: Aldehyde oxidase/xanthine dehydrogenase, molybdopterin binding; I…	K11817: AAO1_2;indole-3-acetaldehyde oxidase [EC:1.2.3.7]
Npp.01A005850.1	indole-3-acetaldehyde oxidase	Indole-3-acetaldehyde oxidase; Xanthine dehydrogenase/oxidase	Indole-3-acetaldehyde oxidase; Xanthine dehydrogenase/oxidase	KOG0430: Xanthine dehydrogenase	GO:0005506: iron ion binding; GO:0009055: electron transfer activity; GO:0051537: 2 iron, 2 sulfur cluster binding; GO:0055114: oxidation-reduction process; GO:0071949: FAD binding	IPR000674: Aldehyde oxidase/xanthine dehydrogenase, a/b hammerhead; IPR001041: 2Fe-2S ferredoxin-type iron-sulfur binding domain; IPR002346: Molybdopterin dehydrogenase, FAD-binding; IPR002888: [2Fe-2S]-binding; IPR005107: CO dehydrogenase flavoprotein, C-terminal; IPR006058: 2Fe-2S ferredoxin, iron-sulphur binding site; IPR008274: Aldehyde oxidase/xanthine dehydrogenase, molybdopterin binding; I…	K11817: AAO1_2;indole-3-acetaldehyde oxidase [EC:1.2.3.7]
Npp.01A005870.1	GATA transcription factor 2	GATA transcription factor 4	GATA transcription factor 4	-	GO:0006355: regulation of transcription, DNA-templated; GO:0008270: zinc ion binding; GO:0043565: sequence-specific DNA binding	IPR000679: Zinc finger, GATA-type; IPR013088: Zinc finger, NHR/GATA-type	-
Npp.01A005880.1	indole-3-acetaldehyde oxidase	Indole-3-acetaldehyde oxidase; Xanthine dehydrogenase/oxidase	Indole-3-acetaldehyde oxidase; Xanthine dehydrogenase/oxidase	KOG0430: Xanthine dehydrogenase	GO:0003676: nucleic acid binding; GO:0004523: RNA-DNA hybrid ribonuclease activity; GO:0005506: iron ion binding; GO:0009055: electron transfer activity; GO:0051536: iron-sulfur cluster binding; GO:0055114: oxidation-reduction process; GO:0071949: FAD binding	IPR000674: Aldehyde oxidase/xanthine dehydrogenase, a/b hammerhead; IPR002156: Ribonuclease H domain; IPR002346: Molybdopterin dehydrogenase, FAD-binding; IPR002888: [2Fe-2S]-binding; IPR005107: CO dehydrogenase flavoprotein, C-terminal; IPR008274: Aldehyde oxidase/xanthine dehydrogenase, molybdopterin binding; IPR012675: Beta-grasp domain superfamily; IPR016166: FAD-binding domain, PCMH-type; IP…	K11817: AAO1_2;indole-3-acetaldehyde oxidase [EC:1.2.3.7]
Npp.01A005890.1	aldehyde oxidase4	-	-	KOG0430: Xanthine dehydrogenase	GO:0016491: oxidoreductase activity; GO:0046872: metal ion binding; GO:0055114: oxidation-reduction process	IPR002888: [2Fe-2S]-binding; IPR036884: [2Fe-2S]-binding domain superfamily	-
Npp.01A005900.1	indole-3-acetaldehyde oxidase	Indole-3-acetaldehyde oxidase; Xanthine dehydrogenase/oxidase	Indole-3-acetaldehyde oxidase; Xanthine dehydrogenase/oxidase	KOG0430: Xanthine dehydrogenase	GO:0005506: iron ion binding; GO:0009055: electron transfer activity; GO:0051537: 2 iron, 2 sulfur cluster binding; GO:0055114: oxidation-reduction process; GO:0071949: FAD binding	IPR000674: Aldehyde oxidase/xanthine dehydrogenase, a/b hammerhead; IPR001041: 2Fe-2S ferredoxin-type iron-sulfur binding domain; IPR002346: Molybdopterin dehydrogenase, FAD-binding; IPR002888: [2Fe-2S]-binding; IPR005107: CO dehydrogenase flavoprotein, C-terminal; IPR006058: 2Fe-2S ferredoxin, iron-sulphur binding site; IPR008274: Aldehyde oxidase/xanthine dehydrogenase, molybdopterin binding; I…	K11817: AAO1_2;indole-3-acetaldehyde oxidase [EC:1.2.3.7]
Npp.01A005910.1	indole-3-acetaldehyde oxidase	Indole-3-acetaldehyde oxidase; Xanthine dehydrogenase/oxidase	Indole-3-acetaldehyde oxidase; Xanthine dehydrogenase/oxidase	KOG0430: Xanthine dehydrogenase	GO:0005506: iron ion binding; GO:0009055: electron transfer activity; GO:0051537: 2 iron, 2 sulfur cluster binding; GO:0055114: oxidation-reduction process; GO:0071949: FAD binding	IPR000674: Aldehyde oxidase/xanthine dehydrogenase, a/b hammerhead; IPR001041: 2Fe-2S ferredoxin-type iron-sulfur binding domain; IPR002346: Molybdopterin dehydrogenase, FAD-binding; IPR002888: [2Fe-2S]-binding; IPR005107: CO dehydrogenase flavoprotein, C-terminal; IPR006058: 2Fe-2S ferredoxin, iron-sulphur binding site; IPR008274: Aldehyde oxidase/xanthine dehydrogenase, molybdopterin binding; I…	K11817: AAO1_2;indole-3-acetaldehyde oxidase [EC:1.2.3.7]
Npp.01A005930.1	GATA transcription factor 2	GATA transcription factor 4	GATA transcription factor 4	-	GO:0006355: regulation of transcription, DNA-templated; GO:0008270: zinc ion binding; GO:0043565: sequence-specific DNA binding	IPR000679: Zinc finger, GATA-type; IPR013088: Zinc finger, NHR/GATA-type	-
Npp.01A005940.1	LOB domain-containing protein 24; hypothetical protein C2845_PM02G45480	LOB domain-containing protein 4	LOB domain-containing protein 4	-	-	IPR004883: Lateral organ boundaries, LOB	-
Npp.01A005950.1	probable glutamate carboxypeptidase VP8	Probable glutamate carboxypeptidase VP8	Probable glutamate carboxypeptidase VP8	KOG2195: Transferrin receptor and related proteins containing the protease-associated (PA) domain	-	IPR007365: Transferrin receptor-like, dimerisation domain; IPR007484: Peptidase M28; IPR036757: Transferrin receptor-like, dimerisation domain superfamily; IPR039373: Glutamate carboxypeptidase 2-like	K01301: NAALAD;N-acetylated-alpha-linked acidic dipeptidase [EC:3.4.17.21]
Npp.01A005960.1	probable carboxylesterase 15	Probable carboxylesterase 15; Tuliposide A-converting enzyme 2, chloroplastic	Probable carboxylesterase 15; Tuliposide A-converting enzyme 2, chloroplastic	KOG1515: Arylacetamide deacetylase	GO:0016787: hydrolase activity	IPR013094: Alpha/beta hydrolase fold-3; IPR029058: Alpha/Beta hydrolase fold; IPR033140: Lipase, GDXG, putative serine active site	-
Npp.01A005970.1	myosin-binding protein 7; uncharacterized protein LOC100277002	-	-	-	-	IPR007656: GTD-binding domain	-
Npp.01A005980.1	protein MKS1-like; hypothetical protein SORBI_3001G063200	-	-	-	-	IPR008889: VQ; IPR039607: VQ motif-containing protein 8/17/18/20/21/25	-
Npp.01A005990.1	calcium-dependent protein kinase 11	Calcium-dependent protein kinase 11	Calcium-dependent protein kinase 11	-	GO:0004672: protein kinase activity; GO:0005509: calcium ion binding; GO:0005524: ATP binding; GO:0006468: protein phosphorylation	IPR000719: Protein kinase domain; IPR001841: Zinc finger, RING-type; IPR002048: EF-hand domain; IPR008271: Serine/threonine-protein kinase, active site; IPR011009: Protein kinase-like domain superfamily; IPR011992: EF-hand domain pair; IPR013083: Zinc finger, RING/FYVE/PHD-type; IPR017441: Protein kinase, ATP binding site; IPR018247: EF-Hand 1, calcium-binding site	K13412: CPK;calcium-dependent protein kinase [EC:2.7.11.1]
Npp.01A006000.1	fasciclin domain	Fasciclin-like arabinogalactan protein 17	Fasciclin-like arabinogalactan protein 17	-	-	IPR000782: FAS1 domain; IPR036378: FAS1 domain superfamily	-
Npp.01A006010.1	calcium-dependent protein kinase 10	Calcium-dependent protein kinase 10	Calcium-dependent protein kinase 10	-	GO:0004672: protein kinase activity; GO:0005509: calcium ion binding; GO:0005524: ATP binding; GO:0006468: protein phosphorylation	IPR000719: Protein kinase domain; IPR002048: EF-hand domain; IPR008271: Serine/threonine-protein kinase, active site; IPR011009: Protein kinase-like domain superfamily; IPR011992: EF-hand domain pair; IPR017441: Protein kinase, ATP binding site; IPR018247: EF-Hand 1, calcium-binding site	K13412: CPK;calcium-dependent protein kinase [EC:2.7.11.1]
Npp.01A006020.1	nuclear pore complex protein NUP1; hypothetical protein SORBI_3001G063700	-	-	-	-	IPR011049: Serralysin-like metalloprotease, C-terminal	-
Npp.01A006030.1	putative phosphatidylglycerol/phosphatidylinositol transfer protein DDB_G0282179; hypothetical protein SORBI_3001G063800	Putative phosphatidylglycerol/phosphatidylinositol transfer protein DDB_G0282179	Putative phosphatidylglycerol/phosphatidylinositol transfer protein DDB_G0282179	KOG4680: Uncharacterized conserved protein, contains ML domain	GO:0032366: intracellular sterol transport	IPR003172: MD-2-related lipid-recognition domain; IPR006311: Twin-arginine translocation pathway, signal sequence; IPR014756: Immunoglobulin E-set; IPR033917: ML domain, phosphatidylinositol/phosphatidylglycerol transfer protein; IPR039670: Sterol transport protein NPC2-like	-
Npp.01A006040.1	RING-H2 finger protein ATL70	Putative RING-H2 finger protein ATL71	Putative RING-H2 finger protein ATL71	-	-	IPR001841: Zinc finger, RING-type; IPR013083: Zinc finger, RING/FYVE/PHD-type	-
Npp.01A006050.1	transferase	-	-	-	GO:0016747: transferase activity, transferring acyl groups other than amino-acyl groups	IPR003480: Transferase; IPR023213: Chloramphenicol acetyltransferase-like domain superfamily	-
Npp.01A006060.1	Alkaline/neutral invertase CINV2	-	-	-	GO:0033926: glycopeptide alpha-N-acetylgalactosaminidase activity	IPR024746: Glycosyl hydrolase family 100	-
Npp.01A006070.1	probable carboxylesterase 15	Probable carboxylesterase 15; Tuliposide A-converting enzyme 1, chloroplastic	Probable carboxylesterase 15; Tuliposide A-converting enzyme 1, chloroplastic	KOG1515: Arylacetamide deacetylase	GO:0016787: hydrolase activity	IPR001623: DnaJ domain; IPR013094: Alpha/beta hydrolase fold-3; IPR029058: Alpha/Beta hydrolase fold; IPR036869: Chaperone J-domain superfamily	-
Npp.01A006080.1	hypothetical protein GQ55_2G360800; uncharacterized protein LOC8079546 isoform X3	-	-	-	GO:0005515: protein binding	IPR032675: Leucine-rich repeat domain superfamily; IPR036047: F-box-like domain superfamily	-
Npp.01A006090.1	dnaJ protein homolog	DnaJ protein homolog	DnaJ protein homolog	-	GO:0005524: ATP binding; GO:0006457: protein folding; GO:0009408: response to heat; GO:0031072: heat shock protein binding; GO:0051082: unfolded protein binding	IPR001305: Heat shock protein DnaJ, cysteine-rich domain; IPR001623: DnaJ domain; IPR002939: Chaperone DnaJ, C-terminal; IPR008971: HSP40/DnaJ peptide-binding; IPR012724: Chaperone DnaJ; IPR018253: DnaJ domain, conserved site; IPR036410: Heat shock protein DnaJ, cysteine-rich domain superfamily; IPR036869: Chaperone J-domain superfamily	K09503: DNAJA2;DnaJ homolog subfamily A member 2
Npp.01A006100.1	IQ-domain 5	Protein IQ-DOMAIN 1	Protein IQ-DOMAIN 1	-	GO:0005515: protein binding	IPR000048: IQ motif, EF-hand binding site	-
Npp.01A006110.1	uncharacterized protein LOC8083910; hypothetical protein SORBI_3001G064800	-	-	-	-	-	-
Npp.01A006120.1	syntaxin-121	Syntaxin-121	Syntaxin-121	KOG0810: SNARE protein Syntaxin 1 and related proteins	GO:0005484: SNAP receptor activity; GO:0006886: intracellular protein transport; GO:0016020: membrane; GO:0016192: vesicle-mediated transport	IPR000727: Target SNARE coiled-coil homology domain; IPR006011: Syntaxin, N-terminal domain; IPR006012: Syntaxin/epimorphin, conserved site; IPR010989: SNARE	K08486: STX1B_2_3;syntaxin 1B/2/3
Npp.01A006130.1	trafficking protein particle complex subunit 8 isoform X1	Trafficking protein particle complex subunit 8	Trafficking protein particle complex subunit 8	KOG1938: Protein with predicted involvement in meiosis (GSG1)	GO:0005515: protein binding	IPR011990: Tetratricopeptide-like helical domain superfamily; IPR024420: TRAPP III complex, Trs85	K20305: TRAPPC8,TRS85;trafficking protein particle complex subunit 8
Npp.01A006140.1	cullin-4	Cullin-4	Cullin-4	KOG2166: Cullins; KOG2167: Cullins	GO:0006511: ubiquitin-dependent protein catabolic process; GO:0031461: cullin-RING ubiquitin ligase complex; GO:0031625: ubiquitin protein ligase binding	IPR001373: Cullin, N-terminal; IPR016157: Cullin, conserved site; IPR016158: Cullin homology domain; IPR016159: Cullin repeat-like-containing domain superfamily; IPR019559: Cullin protein, neddylation domain; IPR033044: Cullin-4B; IPR036317: Cullin homology domain superfamily; IPR036388: Winged helix-like DNA-binding domain superfamily; IPR036390: Winged helix DNA-binding domain superfamily	K10609: CUL4;cullin 4
Npp.01A006150.1	protein ROOT PRIMORDIUM DEFECTIVE 1; hypothetical protein	Protein WHAT&apos;S THIS FACTOR 9, mitochondrial	Protein WHAT&apos;S THIS FACTOR 9, mitochondrial	-	-	IPR021099: Plant organelle RNA recognition domain	-
Npp.01A006160.1	DNA-binding protein HEXBP	-	-	-	GO:0003676: nucleic acid binding; GO:0008270: zinc ion binding	IPR001878: Zinc finger, CCHC-type; IPR010666: Zinc finger, GRF-type; IPR036875: Zinc finger, CCHC-type superfamily	-
Npp.01A006180.1	peroxisomal (S)-2-hydroxy-acid oxidase GLO1 isoform X1	Peroxisomal (S)-2-hydroxy-acid oxidase GLO1	Peroxisomal (S)-2-hydroxy-acid oxidase GLO1	KOG0538: Glycolate oxidase	GO:0010181: FMN binding; GO:0016491: oxidoreductase activity; GO:0055114: oxidation-reduction process	IPR000262: FMN-dependent dehydrogenase; IPR008259: FMN-dependent alpha-hydroxy acid dehydrogenase, active site; IPR012133: Alpha-hydroxy acid dehydrogenase, FMN-dependent; IPR013785: Aldolase-type TIM barrel; IPR037396: FMN hydroxy acid dehydrogenase domain	K11517: HAO;(S)-2-hydroxy-acid oxidase [EC:1.1.3.15]
Npp.01A006190.1	peroxisomal membrane protein 13	-	-	-	GO:0005777: peroxisome; GO:0016021: integral component of membrane; GO:0016560: protein import into peroxisome matrix, docking	IPR035463: Peroxin 13	K13344: PEX13;peroxin-13
Npp.01A006200.1	probable glutathione S-transferase GSTU1	Probable glutathione S-transferase GSTU1	Probable glutathione S-transferase GSTU1	-	GO:0005515: protein binding	IPR004045: Glutathione S-transferase, N-terminal; IPR010987: Glutathione S-transferase, C-terminal-like; IPR036249: Thioredoxin-like superfamily; IPR036282: Glutathione S-transferase, C-terminal domain superfamily; IPR040079: Glutathione Transferase family	K00799: GST,gst;glutathione S-transferase [EC:2.5.1.18]
Npp.01A006210.1	probable glutathione S-transferase GSTU1	Probable glutathione S-transferase GSTU1	Probable glutathione S-transferase GSTU1	-	GO:0005515: protein binding	IPR004045: Glutathione S-transferase, N-terminal; IPR004046: Glutathione S-transferase, C-terminal; IPR010987: Glutathione S-transferase, C-terminal-like; IPR036249: Thioredoxin-like superfamily; IPR036282: Glutathione S-transferase, C-terminal domain superfamily	-
Npp.01A006220.1	transcription factor PCF6	Transcription factor PCF6	Transcription factor PCF6	-	GO:0003700: DNA binding transcription factor activity	IPR005333: Transcription factor, TCP; IPR017887: Transcription factor TCP subgroup	-
Npp.01A006230.1	putative ALA-interacting subunit 2	Cell cycle control protein 50A	Cell cycle control protein 50A	KOG2952: Cell cycle control protein	GO:0016020: membrane	IPR005045: CDC50/LEM3 family	-
Npp.01A006240.1	uncharacterized LOC103644136 isoform X1	-	-	-	GO:0008270: zinc ion binding; GO:0042025: host cell nucleus	IPR012935: Zinc finger, C3HC-like	-
Npp.01A006250.1	transcription termination factor MTEF1, chloroplastic; hypothetical protein GQ55_9G059500	-	-	-	GO:0003690: double-stranded DNA binding; GO:0006355: regulation of transcription, DNA-templated	IPR003690: Transcription termination factor, mitochondrial/chloroplastic; IPR038538: MTERF superfamily, mitochondrial/chloroplastic	K15032: MTERFD;mTERF domain-containing protein,mitochondrial
Npp.01A006260.1	accelerated cell death 11	-	-	KOG4189: Uncharacterized conserved protein	GO:0005737: cytoplasm; GO:0120009: intermembrane lipid transfer; GO:0120013: intermembrane lipid transfer activity	IPR014830: Glycolipid transfer protein domain; IPR036497: Glycolipid transfer protein superfamily	-
Npp.01A006270.1	putative serpin-Z6C	Putative serpin-Z6C	Putative serpin-Z6C	-	GO:0005615: extracellular space	IPR000215: Serpin family; IPR023796: Serpin domain; IPR036186: Serpin superfamily; IPR042178: Serpin superfamily, domain 1	-
Npp.01A006280.1	putative serpin-Z6C	Putative serpin-Z6C	Putative serpin-Z6C	-	GO:0005615: extracellular space	IPR000215: Serpin family; IPR023796: Serpin domain; IPR036186: Serpin superfamily; IPR042178: Serpin superfamily, domain 1; IPR042185: Serpin superfamily, domain 2	-
Npp.01A006290.1	putative serpin-Z6C; hypothetical protein SORBI_3001G066800	Putative serpin-Z6C	Putative serpin-Z6C	-	GO:0005615: extracellular space	IPR000215: Serpin family; IPR023796: Serpin domain; IPR036186: Serpin superfamily; IPR042185: Serpin superfamily, domain 2	-
Npp.01A006300.1	hypothetical protein SORBI_3001G066800; putative serpin-Z6C	Serpin-Z2B	Serpin-Z2B	-	GO:0005615: extracellular space	IPR000215: Serpin family; IPR023796: Serpin domain; IPR036186: Serpin superfamily; IPR042178: Serpin superfamily, domain 1	-
Npp.01A006310.1	putative mannan endo-1,4-beta-mannosidase 5	Putative mannan endo-1,4-beta-mannosidase 5	Putative mannan endo-1,4-beta-mannosidase 5	-	GO:0004553: hydrolase activity, hydrolyzing O-glycosyl compounds; GO:0005975: carbohydrate metabolic process	IPR001547: Glycoside hydrolase, family 5; IPR017853: Glycoside hydrolase superfamily; IPR018087: Glycoside hydrolase, family 5, conserved site	K19355: MAN;mannan endo-1,4-beta-mannosidase [EC:3.2.1.78]
Npp.01A006320.1	CCR4-NOT transcription complex subunit 9; hypothetical protein C2845_PM02G45840	CCR4-NOT transcription complex subunit 9	CCR4-NOT transcription complex subunit 9	KOG3036: Protein involved in cell differentiation/sexual development	-	IPR011989: Armadillo-like helical; IPR016024: Armadillo-type fold	K12606: RCD1,CNOT9,CAF40;CCR4-NOT transcription complex subunit 9
Npp.01A006330.1	ferredoxin--NADP reductase, root isozyme, chloroplastic	Ferredoxin--NADP reductase, root isozyme, chloroplastic	Ferredoxin--NADP reductase, root isozyme, chloroplastic	KOG1158: NADP/FAD dependent oxidoreductase	GO:0016491: oxidoreductase activity; GO:0055114: oxidation-reduction process	IPR001433: Oxidoreductase FAD/NAD(P)-binding; IPR001709: Flavoprotein pyridine nucleotide cytochrome reductase; IPR015701: Ferredoxin--NADP reductase; IPR017927: FAD-binding domain, ferredoxin reductase-type; IPR017938: Riboflavin synthase-like beta-barrel; IPR035442: Ferredoxin--NADP reductase, plant and Cyanobacteria type; IPR039261: Ferredoxin-NADP reductase (FNR), nucleotide-binding domain	K02641: petH;ferredoxin--NADP+ reductase [EC:1.18.1.2]
Npp.01A006340.1	WPP domain-associated protein	WPP domain-associated protein (Fragment)	WPP domain-associated protein (Fragment)	-	-	IPR037490: WPP domain-associated protein	-
Npp.01A006350.1	histidinol dehydrogenase, chloroplastic isoform X1	Histidinol dehydrogenase, chloroplastic; Histidine biosynthesis trifunctional protein	Histidinol dehydrogenase, chloroplastic; Histidine biosynthesis trifunctional protein	KOG2697: Histidinol dehydrogenase	GO:0000105: histidine biosynthetic process; GO:0004399: histidinol dehydrogenase activity; GO:0046872: metal ion binding; GO:0051287: NAD binding; GO:0055114: oxidation-reduction process	IPR001692: Histidinol dehydrogenase, conserved site; IPR012131: Histidinol dehydrogenase; IPR016161: Aldehyde/histidinol dehydrogenase; IPR022695: Histidinol dehydrogenase, monofunctional	K00013: hisD;histidinol dehydrogenase [EC:1.1.1.23]
Npp.01A006360.1	protein arv1 homolog	Protein ARV 2	Protein ARV 2	KOG3134: Predicted membrane protein	GO:0032366: intracellular sterol transport	IPR007290: Arv1 protein	K21848: ARV1;lipid intermediate transporter
Npp.01A006370.1	patatin-like protein 3	Patatin-like protein 3	Patatin-like protein 3	KOG0513: Ca2+-independent phospholipase A2	GO:0004865: protein serine/threonine phosphatase inhibitor activity; GO:0006629: lipid metabolic process; GO:0032515: negative regulation of phosphoprotein phosphatase activity	IPR002641: Patatin-like phospholipase domain; IPR011107: Type 1 protein phosphatase inhibitor; IPR016035: Acyl transferase/acyl hydrolase/lysophospholipase	-
Npp.01A006380.1	uncharacterized protein LOC8083928	Renalase	Renalase	-	-	IPR036188: FAD/NAD(P)-binding domain superfamily	K18208: RNLS;renalase [EC:1.6.3.5]
Npp.01A006390.1	DEAD-box ATP-dependent RNA helicase 21	DEAD-box ATP-dependent RNA helicase 21	DEAD-box ATP-dependent RNA helicase 21	KOG0333: U5 snRNP-like RNA helicase subunit	GO:0003676: nucleic acid binding; GO:0005524: ATP binding	IPR000629: ATP-dependent RNA helicase DEAD-box, conserved site; IPR001650: Helicase, C-terminal; IPR011545: DEAD/DEAH box helicase domain; IPR014001: Helicase superfamily 1/2, ATP-binding domain; IPR027417: P-loop containing nucleoside triphosphate hydrolase	-
Npp.01A006400.1	zinc transporter ZTP29; hypothetical protein GQ55_6G000300	Zinc transporter ZTP29	Zinc transporter ZTP29	-	GO:0016020: membrane; GO:0030001: metal ion transport; GO:0046873: metal ion transmembrane transporter activity; GO:0055085: transmembrane transport	IPR003689: Zinc/iron permease	K07238: TC.ZIP,zupT,ZRT3,ZIP2;zinc transporter,ZIP family
Npp.01A006410.1	glutathione S-transferase T3; hypothetical protein SORBI_3004G043400	-	-	-	-	IPR029466: No apical meristem-associated, C-terminal domain	-
Npp.01A006420.1	AP-1 complex subunit sigma-1	AP-1 complex subunit sigma-1	AP-1 complex subunit sigma-1	KOG0934: Clathrin adaptor complex, small subunit; KOG0935: Clathrin adaptor complex, small subunit	GO:0006886: intracellular protein transport; GO:0016192: vesicle-mediated transport; GO:0030117: membrane coat	IPR000804: Clathrin adaptor complex, small chain; IPR011012: Longin-like domain superfamily; IPR016635: Adaptor protein complex, sigma subunit; IPR022775: AP complex, mu/sigma subunit	K12394: AP1S1_2;AP-1 complex subunit sigma 1/2
Npp.01A006430.1	transcription factor PIF5 isoform X2	Transcription factor PHYTOCHROME INTERACTING FACTOR-LIKE 13	Transcription factor PHYTOCHROME INTERACTING FACTOR-LIKE 13	-	GO:0046983: protein dimerization activity	IPR011598: Myc-type, basic helix-loop-helix (bHLH) domain; IPR036638: Helix-loop-helix DNA-binding domain superfamily	K16189: PIF4;phytochrome-interacting factor 4
Npp.01A006450.1	carboxyl-terminal-processing peptidase 1, chloroplastic	-	-	-	-	-	-
Npp.01A006460.1	hypothetical protein SORBI_3006G107332	-	-	-	GO:0003676: nucleic acid binding; GO:0008270: zinc ion binding	IPR001878: Zinc finger, CCHC-type; IPR036875: Zinc finger, CCHC-type superfamily	-
Npp.01A006480.1	reticulon-like protein B8	Reticulon-like protein B8	Reticulon-like protein B8	KOG1792: Reticulon	-	IPR003388: Reticulon	-
Npp.01A006490.1	hypothetical protein SORBI_3001G068800	-	-	-	-	-	-
Npp.01A006500.1	probable ribose-5-phosphate isomerase 4, chloroplastic	Probable ribose-5-phosphate isomerase 4, chloroplastic	Probable ribose-5-phosphate isomerase 4, chloroplastic	-	GO:0003735: structural constituent of ribosome; GO:0004751: ribose-5-phosphate isomerase activity; GO:0005840: ribosome; GO:0006412: translation; GO:0009052: pentose-phosphate shunt, non-oxidative branch	IPR004788: Ribose 5-phosphate isomerase, type A; IPR007836: Ribosomal protein L41; IPR037171: NagB/RpiA transferase-like	-
Npp.01A006510.1	pentatricopeptide repeat-containing protein At4g21300	Pentatricopeptide repeat-containing protein At4g21300	Pentatricopeptide repeat-containing protein At4g21300	-	GO:0005515: protein binding	IPR002885: Pentatricopeptide repeat; IPR011990: Tetratricopeptide-like helical domain superfamily	-
Npp.01A006520.1	uncharacterized protein LOC8084155	-	-	-	GO:0006355: regulation of transcription, DNA-templated	IPR007592: GLABROUS1 enhancer-binding protein family	-
Npp.01A006530.1	uncharacterized protein LOC8084156	Ribosome-binding ATPase YchF; Obg-like ATPase 1	Ribosome-binding ATPase YchF; Obg-like ATPase 1	KOG1489: Predicted GTP-binding protein (ODN superfamily); KOG1491: Predicted GTP-binding protein (ODN superfamily)	GO:0005525: GTP binding	IPR004396: Ribosome-binding ATPase YchF/Obg-like ATPase 1; IPR006073: GTP binding domain; IPR012675: Beta-grasp domain superfamily; IPR012676: TGS-like; IPR013029: YchF, C-terminal domain; IPR023192: TGS-like domain superfamily; IPR027417: P-loop containing nucleoside triphosphate hydrolase; IPR031167: OBG-type guanine nucleotide-binding (G) domain; IPR041706: YchF, N-terminal	K19788: OLA1;obg-like ATPase 1
Npp.01A006540.1	alpha N-terminal protein methyltransferase 1	Alpha N-terminal protein methyltransferase 1	Alpha N-terminal protein methyltransferase 1	-	GO:0006480: N-terminal protein amino acid methylation; GO:0008168: methyltransferase activity	IPR008576: Alpha-N-methyltransferase NTM1; IPR029063: S-adenosyl-L-methionine-dependent methyltransferase	K16219: NTMT1,METTL11A,NTM1;protein N-terminal methyltransferase [EC:2.1.1.244]
Npp.01A006550.1	dihydroceramide fatty acyl 2-hydroxylase FAH1	Dihydroceramide fatty acyl 2-hydroxylase FAH1	Dihydroceramide fatty acyl 2-hydroxylase FAH1	KOG0539: Sphingolipid fatty acid hydroxylase	GO:0005506: iron ion binding; GO:0008610: lipid biosynthetic process; GO:0016491: oxidoreductase activity; GO:0055114: oxidation-reduction process	IPR006694: Fatty acid hydroxylase	K19706: FAH;dihydroceramide fatty acyl 2-hydroxylase [EC:1.14.18.7]
Npp.01A006560.1	hypothetical protein SORBI_3006G107332	-	-	-	GO:0003676: nucleic acid binding; GO:0008270: zinc ion binding	IPR001878: Zinc finger, CCHC-type; IPR036875: Zinc finger, CCHC-type superfamily	-
Npp.01A006570.1	5&apos;-nucleotidase domain-containing protein 4 isoform X3; hypothetical protein SORBI_3001G073500	Cytosolic purine 5&apos;-nucleotidase	Cytosolic purine 5&apos;-nucleotidase	KOG2469: IMP-GMP specific 5'-nucleotidase; KOG2470: Similar to IMP-GMP specific 5'-nucleotidase	-	IPR008380: HAD-superfamily hydrolase, subfamily IG, 5'-nucleotidase; IPR016695: Purine 5'-nucleotidase; IPR023214: HAD superfamily; IPR036412: HAD-like superfamily	-
Npp.01A006580.1	inosine-5&apos;-monophosphate dehydrogenase	Inosine-5&apos;-monophosphate dehydrogenase 2	Inosine-5&apos;-monophosphate dehydrogenase 2	KOG2550: IMP dehydrogenase/GMP reductase	GO:0003938: IMP dehydrogenase activity; GO:0006164: purine nucleotide biosynthetic process; GO:0055114: oxidation-reduction process	IPR000644: CBS domain; IPR001093: IMP dehydrogenase/GMP reductase; IPR005990: Inosine-5'-monophosphate dehydrogenase; IPR013785: Aldolase-type TIM barrel; IPR015875: IMP dehydrogenase / GMP reductase, conserved site	K00088: IMPDH,guaB;IMP dehydrogenase [EC:1.1.1.205]
Npp.01A006590.1	actin-depolymerizing factor 2	Actin-depolymerizing factor 2	Actin-depolymerizing factor 2	KOG1735: Actin depolymerizing factor	GO:0003779: actin binding; GO:0015629: actin cytoskeleton; GO:0030042: actin filament depolymerization	IPR002108: Actin-depolymerising factor homology domain; IPR017904: ADF/Cofilin; IPR029006: ADF-H/Gelsolin-like domain superfamily	K05765: CFL;cofilin
Npp.01A006600.1	hypothetical protein SORBI_3001G070100	Auxin-responsive protein SAUR40	Auxin-responsive protein SAUR40	-	GO:0009733: response to auxin	IPR003676: Small auxin-up RNA	K14488: SAUR;SAUR family protein
Npp.01A006610.1	uncharacterized protein LOC8083937	-	-	-	-	-	-
Npp.01A006620.1	hypothetical protein SORBI_3001G070100	Auxin-responsive protein SAUR40	Auxin-responsive protein SAUR40	-	GO:0009733: response to auxin	IPR003676: Small auxin-up RNA	K14488: SAUR;SAUR family protein
Npp.01A006630.1	uncharacterized protein LOC8083937	-	-	-	-	-	-
Npp.01A006640.1	glutathione S-transferase T3	-	-	-	-	-	-
Npp.01A006650.1	hypothetical protein BAE44_0025042	-	-	-	-	-	-
Npp.01A006660.1	hypothetical protein SORBI_3001G070100	Auxin-responsive protein SAUR40	Auxin-responsive protein SAUR40	-	GO:0009733: response to auxin	IPR003676: Small auxin-up RNA	-
Npp.01A006670.1	uncharacterized protein LOC8083937	-	-	-	-	-	-
Npp.01A006680.1	glutathione S-transferase T3	-	-	-	-	-	-
Npp.01A006690.1	photosystem I reaction center subunit III, chloroplastic	Photosystem I reaction center subunit III, chloroplastic	Photosystem I reaction center subunit III, chloroplastic	-	GO:0009522: photosystem I; GO:0009538: photosystem I reaction center; GO:0015979: photosynthesis	IPR003666: Photosystem I PsaF, reaction centre subunit III; IPR036577: Photosystem I PsaF, reaction centre subunit III superfamily	K02694: psaF;photosystem I subunit III
Npp.01A006700.1	putative tubulin alpha-3 chain	Tubulin alpha-3 chain	Tubulin alpha-3 chain	-	GO:0003924: GTPase activity; GO:0005200: structural constituent of cytoskeleton; GO:0005525: GTP binding; GO:0005874: microtubule; GO:0007017: microtubule-based process	IPR000217: Tubulin; IPR002452: Alpha tubulin; IPR003008: Tubulin/FtsZ, GTPase domain; IPR008280: Tubulin/FtsZ, C-terminal; IPR017975: Tubulin, conserved site; IPR018316: Tubulin/FtsZ, 2-layer sandwich domain; IPR023123: Tubulin, C-terminal; IPR036525: Tubulin/FtsZ, GTPase domain superfamily; IPR037103: Tubulin/FtsZ, C-terminal domain superfamily	K07374: TUBA;tubulin alpha
Npp.01A006710.1	probable protein phosphatase 2C 68	Probable protein phosphatase 2C 68	Probable protein phosphatase 2C 68	-	GO:0004722: protein serine/threonine phosphatase activity; GO:0006470: protein dephosphorylation	IPR001932: PPM-type phosphatase domain; IPR015655: Protein phosphatase 2C family; IPR036457: PPM-type phosphatase domain superfamily	-
Npp.01A006720.1	NADH-ubiquinone oxidoreductase 23 kDa subunit	NADH dehydrogenase [ubiquinone] iron-sulfur protein 8, mitochondrial; NADH-ubiquinone oxidoreductase subunit 8	NADH dehydrogenase [ubiquinone] iron-sulfur protein 8, mitochondrial; NADH-ubiquinone oxidoreductase subunit 8	KOG3256: NADH:ubiquinone oxidoreductase, NDUFS8/23 kDa subunit	GO:0016020: membrane; GO:0016651: oxidoreductase activity, acting on NAD(P)H; GO:0051539: 4 iron, 4 sulfur cluster binding; GO:0055114: oxidation-reduction process	IPR010226: NADH-quinone oxidoreductase, chain I; IPR017896: 4Fe-4S ferredoxin-type, iron-sulphur binding domain; IPR017900: 4Fe-4S ferredoxin, iron-sulphur binding, conserved site	K03941: NDUFS8;NADH dehydrogenase (ubiquinone) Fe-S protein 8 [EC:7.1.1.2]
Npp.01A006730.1	5&apos;-nucleotidase domain-containing protein 4 isoform X1; hypothetical protein SORBI_3001G073500	Cytosolic purine 5&apos;-nucleotidase	Cytosolic purine 5&apos;-nucleotidase	KOG2469: IMP-GMP specific 5'-nucleotidase; KOG2470: Similar to IMP-GMP specific 5'-nucleotidase	-	IPR008380: HAD-superfamily hydrolase, subfamily IG, 5'-nucleotidase; IPR016695: Purine 5'-nucleotidase; IPR023214: HAD superfamily; IPR036412: HAD-like superfamily	-
Npp.01A006740.1	5&apos;-nucleotidase domain-containing protein 4 isoform X3; hypothetical protein SORBI_3001G073500	Cytosolic purine 5&apos;-nucleotidase	Cytosolic purine 5&apos;-nucleotidase	KOG2469: IMP-GMP specific 5'-nucleotidase; KOG2470: Similar to IMP-GMP specific 5'-nucleotidase	-	IPR008380: HAD-superfamily hydrolase, subfamily IG, 5'-nucleotidase; IPR016695: Purine 5'-nucleotidase; IPR023214: HAD superfamily; IPR036412: HAD-like superfamily	-
Npp.01A006750.1	uncharacterized protein LOC8083951; hypothetical protein ZEAMMB73_Zm00001d034248	-	-	-	-	-	-
Npp.01A006760.1	uncharacterized protein LOC112877107	Putative S-adenosyl-L-methionine-dependent methyltransferase MAB_3787	Putative S-adenosyl-L-methionine-dependent methyltransferase MAB_3787	-	GO:0008168: methyltransferase activity; GO:0032259: methylation	IPR007213: Methyltransferase Ppm1/Ppm2/Tcmp; IPR029063: S-adenosyl-L-methionine-dependent methyltransferase	-
Npp.01A006770.1	uncharacterized protein LOC8083950; hypothetical protein SORBI_3001G073150	Probable methyltransferase PMT28	Probable methyltransferase PMT28	-	GO:0008168: methyltransferase activity	IPR004159: Putative S-adenosyl-L-methionine-dependent methyltransferase; IPR029063: S-adenosyl-L-methionine-dependent methyltransferase	K15449: TYW1;tRNA wybutosine-synthesizing protein 1 [EC:4.1.3.44]
Npp.01A006780.1	hypothetical protein SORBI_3001G073150; uncharacterized LOC111828523	S-adenosyl-L-methionine-dependent tRNA 4-demethylwyosine synthase	S-adenosyl-L-methionine-dependent tRNA 4-demethylwyosine synthase	KOG1160: Fe-S oxidoreductase	GO:0008033: tRNA processing; GO:0010181: FMN binding; GO:0016829: lyase activity; GO:0051539: 4 iron, 4 sulfur cluster binding; GO:0055114: oxidation-reduction process	IPR001094: Flavodoxin-like; IPR007197: Radical SAM; IPR008254: Flavodoxin/nitric oxide synthase; IPR013785: Aldolase-type TIM barrel; IPR013917: tRNA wybutosine-synthesis; IPR023993: S-adenosyl-L-methionine-dependent tRNA 4-demethylwyosine synthase, archaea; IPR029039: Flavoprotein-like superfamily; IPR034556: S-adenosyl-L-methionine-dependent tRNA 4-demethylwyosine synthase	K15449: TYW1;tRNA wybutosine-synthesizing protein 1 [EC:4.1.3.44]
Npp.01A006790.1	uncharacterized protein LOC110433196; transposon protein, putative, mutator sub-class	-	-	-	GO:0006486: protein glycosylation	IPR013174: Dolichol-phosphate mannosyltransferase subunit 3; IPR018289: MULE transposase domain	K09659: DPM3;dolichol-phosphate mannosyltransferase subunit 3
Npp.01A006800.1	pentatricopeptide repeat-containing protein At2g22070 isoform X1; hypothetical protein SETIT_9G072300v2	Pentatricopeptide repeat-containing protein At2g22070	Pentatricopeptide repeat-containing protein At2g22070	-	GO:0005515: protein binding; GO:0008270: zinc ion binding	IPR002885: Pentatricopeptide repeat; IPR011990: Tetratricopeptide-like helical domain superfamily; IPR032867: DYW domain	-
Npp.01A006810.1	uncharacterized protein LOC109940452	Secreted RxLR effector protein 161	Secreted RxLR effector protein 161	-	-	IPR002744: MIP18 family-like; IPR034904: Fe-S cluster assembly domain superfamily; IPR043502: DNA/RNA polymerase superfamily	-
Npp.01A006830.1	uncharacterized protein At1g01500	-	-	-	-	-	-
Npp.01A006840.1	uncharacterized protein LOC8083947	-	-	-	-	IPR032795: DUF3741-associated sequence motif	-
Npp.01A006850.1	hypothetical protein C2845_PM02G42420; uncharacterized protein LOC8084168	-	-	-	-	IPR022059: Protein of unknown function DUF3615	-
Npp.01A006860.1	protein ALP1-like	-	-	KOG4585: Predicted transposase	-	IPR027806: Harbinger transposase-derived nuclease domain; IPR038765: Papain-like cysteine peptidase superfamily	-
Npp.01A006870.1	hypothetical protein ZEAMMB73_Zm00001d050432; uncharacterized protein LOC106804421	-	-	-	-	IPR024752: Myb/SANT-like domain	-
Npp.01A006880.1	hypothetical protein SORBI_3006G107332	-	-	-	GO:0003676: nucleic acid binding; GO:0008270: zinc ion binding	IPR001878: Zinc finger, CCHC-type; IPR036875: Zinc finger, CCHC-type superfamily	-
Npp.01A006890.1	succinate dehydrogenase; hypothetical protein PAHAL_9G067400	Succinate dehydrogenase [ubiquinone] flavoprotein subunit, mitochondrial	Succinate dehydrogenase [ubiquinone] flavoprotein subunit, mitochondrial	KOG2403: Succinate dehydrogenase, flavoprotein subunit	GO:0016491: oxidoreductase activity; GO:0055114: oxidation-reduction process	IPR003953: FAD-dependent oxidoreductase 2, FAD binding domain; IPR015939: Fumarate reductase/succinate dehydrogenase flavoprotein-like, C-terminal; IPR027477: Succinate dehydrogenase/fumarate reductase flavoprotein, catalytic domain superfamily; IPR036188: FAD/NAD(P)-binding domain superfamily; IPR037099: Fumarate reductase/succinate dehydrogenase flavoprotein-like, C-terminal domain superfamily	-
Npp.01A006900.1	-	-	-	KOG2403: Succinate dehydrogenase, flavoprotein subunit	-	IPR003953: FAD-dependent oxidoreductase 2, FAD binding domain; IPR036188: FAD/NAD(P)-binding domain superfamily	-
Npp.01A006910.1	glucose-6-phosphate isomerase	Glucose-6-phosphate isomerase, cytosolic	Glucose-6-phosphate isomerase, cytosolic	KOG2446: Glucose-6-phosphate isomerase	GO:0004347: glucose-6-phosphate isomerase activity; GO:0006094: gluconeogenesis; GO:0006096: glycolytic process	IPR001672: Phosphoglucose isomerase (PGI); IPR018189: Phosphoglucose isomerase, conserved site; IPR035476: Phosphoglucose isomerase, SIS domain 1	K01810: GPI,pgi;glucose-6-phosphate isomerase [EC:5.3.1.9]
Npp.01A006920.1	glucose-6-phosphate isomerase, cytosolic	Glucose-6-phosphate isomerase, cytosolic	Glucose-6-phosphate isomerase, cytosolic	KOG2446: Glucose-6-phosphate isomerase	GO:0004347: glucose-6-phosphate isomerase activity; GO:0006094: gluconeogenesis; GO:0006096: glycolytic process	IPR001672: Phosphoglucose isomerase (PGI); IPR001792: Acylphosphatase-like domain; IPR018189: Phosphoglucose isomerase, conserved site; IPR023096: Phosphoglucose isomerase, C-terminal; IPR035482: Phosphoglucose isomerase, SIS domain 2; IPR036046: Acylphosphatase-like domain superfamily	K01810: GPI,pgi;glucose-6-phosphate isomerase [EC:5.3.1.9]
Npp.01A006930.1	proline-rich receptor-like protein kinase PERK4	Proline-rich receptor-like protein kinase PERK4	Proline-rich receptor-like protein kinase PERK4	-	GO:0004672: protein kinase activity; GO:0005524: ATP binding; GO:0006468: protein phosphorylation	IPR000719: Protein kinase domain; IPR001245: Serine-threonine/tyrosine-protein kinase, catalytic domain; IPR008271: Serine/threonine-protein kinase, active site; IPR011009: Protein kinase-like domain superfamily; IPR017441: Protein kinase, ATP binding site	-
Npp.01A006940.1	uncharacterized protein LOC8083944; hypothetical protein SORBI_3001G071600	-	-	-	GO:0005515: protein binding	IPR003169: GYF domain; IPR035445: GYF-like domain superfamily	-
Npp.01A006950.1	hypothetical protein SORBI_3001G071500, partial	-	-	-	-	-	-
Npp.01A006960.1	hypothetical protein ZEAMMB73_Zm00001d013153; uncharacterized protein LOC8084166	-	-	-	-	IPR039204: Magnesium transporter MRS2-like	-
Npp.01A006970.1	protein HIRA	Protein HIRA	Protein HIRA	KOG0973: Histone transcription regulator HIRA, WD repeat superfamily	GO:0005515: protein binding; GO:0005634: nucleus; GO:0006325: chromatin organization; GO:0006351: transcription, DNA-templated; GO:0006355: regulation of transcription, DNA-templated	IPR001680: WD40 repeat; IPR011494: TUP1-like enhancer of split; IPR015943: WD40/YVTN repeat-like-containing domain superfamily; IPR017986: WD40-repeat-containing domain; IPR019775: WD40 repeat, conserved site; IPR031120: WD repeat HIR1; IPR036322: WD40-repeat-containing domain superfamily	K11293: HIRA,HIR1;protein HIRA/HIR1
Npp.01A006980.1	hypothetical protein SORBI_3001G071250	-	-	-	-	-	-
Npp.01A006990.1	hypothetical protein SORBI_3001G071250	-	-	-	GO:0005515: protein binding	IPR036047: F-box-like domain superfamily	-
Npp.01A007000.1	-	-	-	-	GO:0003676: nucleic acid binding; GO:0008270: zinc ion binding	IPR001878: Zinc finger, CCHC-type; IPR036875: Zinc finger, CCHC-type superfamily	-
Npp.01A007010.1	mitochondrial import inner membrane translocase subunit TIM14-3	Mitochondrial import inner membrane translocase subunit TIM14-3	Mitochondrial import inner membrane translocase subunit TIM14-3	KOG0723: Molecular chaperone (DnaJ superfamily)	-	IPR001623: DnaJ domain; IPR036869: Chaperone J-domain superfamily	K09539: DNAJC19;DnaJ homolog subfamily C member 19
Npp.01A007020.1	hypothetical protein PAHAL_7G146900; G-type lectin S-receptor-like serine/threonine-protein kinase	-	-	-	-	IPR011009: Protein kinase-like domain superfamily	-
Npp.01A007030.1	transcription factor JUNGBRUNNEN 1	Protein FEZ; Transcription factor JUNGBRUNNEN 1	Protein FEZ; Transcription factor JUNGBRUNNEN 1	-	GO:0003677: DNA binding; GO:0006355: regulation of transcription, DNA-templated	IPR003441: NAC domain; IPR036093: NAC domain superfamily	-
Npp.01A007040.1	protein JASON	-	-	-	-	-	-
Npp.01A007050.1	protein HIRA	Protein HIRA	Protein HIRA	KOG0973: Histone transcription regulator HIRA, WD repeat superfamily	GO:0005515: protein binding; GO:0005634: nucleus; GO:0006325: chromatin organization; GO:0006351: transcription, DNA-templated	IPR001680: WD40 repeat; IPR015943: WD40/YVTN repeat-like-containing domain superfamily; IPR017986: WD40-repeat-containing domain; IPR019775: WD40 repeat, conserved site; IPR020472: G-protein beta WD-40 repeat; IPR031120: WD repeat HIR1; IPR036322: WD40-repeat-containing domain superfamily	-
Npp.01A007060.1	hypothetical protein ZEAMMB73_Zm00001d013153; uncharacterized protein LOC8084166	-	-	-	-	-	-
Npp.01A007070.1	hypothetical protein SORBI_3001G071500, partial	-	-	-	-	-	-
Npp.01A007080.1	uncharacterized protein LOC8083939; hypothetical protein Zm00014a_039243	-	-	-	-	IPR029044: Nucleotide-diphospho-sugar transferases	-
Npp.01A007090.1	Protein FAR1-RELATED SEQUENCE 5	L-type lectin-domain containing receptor kinase IX.1	L-type lectin-domain containing receptor kinase IX.1	-	GO:0003700: DNA binding transcription factor activity; GO:0004672: protein kinase activity; GO:0005524: ATP binding; GO:0006355: regulation of transcription, DNA-templated; GO:0006468: protein phosphorylation; GO:0008270: zinc ion binding; GO:0030246: carbohydrate binding	IPR000719: Protein kinase domain; IPR001220: Legume lectin domain; IPR001289: Nuclear transcription factor Y subunit A; IPR004330: FAR1 DNA binding domain; IPR006564: Zinc finger, PMZ-type; IPR007527: Zinc finger, SWIM-type; IPR008271: Serine/threonine-protein kinase, active site; IPR011009: Protein kinase-like domain superfamily; IPR013320: Concanavalin A-like lectin/glucanase domain superfamily…	-
Npp.01A007100.1	glutathione S-transferase T3	Glutathione S-transferase T3	Glutathione S-transferase T3	-	-	IPR029466: No apical meristem-associated, C-terminal domain	-
Npp.01A007110.1	Malate dehydrogenase	Malate dehydrogenase, glyoxysomal	Malate dehydrogenase, glyoxysomal	KOG1494: NAD-dependent malate dehydrogenase	GO:0005975: carbohydrate metabolic process; GO:0006099: tricarboxylic acid cycle; GO:0006108: malate metabolic process; GO:0030060: L-malate dehydrogenase activity; GO:0055114: oxidation-reduction process	IPR001236: Lactate/malate dehydrogenase, N-terminal; IPR001252: Malate dehydrogenase, active site; IPR001557: L-lactate/malate dehydrogenase; IPR010097: Malate dehydrogenase, type 1; IPR015955: Lactate dehydrogenase/glycoside hydrolase, family 4, C-terminal; IPR022383: Lactate/malate dehydrogenase, C-terminal; IPR036291: NAD(P)-binding domain superfamily	K00026: MDH2;malate dehydrogenase [EC:1.1.1.37]
Npp.01A007120.1	leucine-rich repeat receptor-like serine/threonine-protein kinase BAM1	Leucine-rich repeat receptor-like serine/threonine-protein kinase BAM1	Leucine-rich repeat receptor-like serine/threonine-protein kinase BAM1	-	GO:0004672: protein kinase activity; GO:0005515: protein binding; GO:0005524: ATP binding; GO:0006468: protein phosphorylation	IPR000719: Protein kinase domain; IPR001245: Serine-threonine/tyrosine-protein kinase, catalytic domain; IPR001611: Leucine-rich repeat; IPR003591: Leucine-rich repeat, typical subtype; IPR008271: Serine/threonine-protein kinase, active site; IPR011009: Protein kinase-like domain superfamily; IPR013210: Leucine-rich repeat-containing N-terminal, plant-type; IPR032675: Leucine-rich repeat domain s…	-
Npp.01A007130.1	kinesin-like protein KIN-8B; hypothetical protein SORBI_3001G074100	Kinesin-like protein KIN-8B	Kinesin-like protein KIN-8B	-	GO:0003777: microtubule motor activity; GO:0005524: ATP binding; GO:0007018: microtubule-based movement; GO:0008017: microtubule binding	IPR001752: Kinesin motor domain; IPR019821: Kinesin motor domain, conserved site; IPR027417: P-loop containing nucleoside triphosphate hydrolase; IPR027640: Kinesin-like protein; IPR036961: Kinesin motor domain superfamily	K10401: KIF18_19;kinesin family member 18/19
Npp.01A007140.1	probable LRR receptor-like serine/threonine-protein kinase At2g16250	Probable LRR receptor-like serine/threonine-protein kinase At2g16250	Probable LRR receptor-like serine/threonine-protein kinase At2g16250	-	GO:0004672: protein kinase activity; GO:0005524: ATP binding; GO:0006468: protein phosphorylation	IPR000719: Protein kinase domain; IPR001245: Serine-threonine/tyrosine-protein kinase, catalytic domain; IPR011009: Protein kinase-like domain superfamily; IPR025875: Leucine rich repeat 4; IPR032675: Leucine-rich repeat domain superfamily	-
Npp.01A007150.1	uncharacterized protein LOC8083956; hypothetical protein	-	-	-	-	-	-
Npp.01A007170.1	L-type lectin-domain containing receptor kinase IV.1	L-type lectin-domain containing receptor kinase IV.1	L-type lectin-domain containing receptor kinase IV.1	-	GO:0004672: protein kinase activity; GO:0005524: ATP binding; GO:0006468: protein phosphorylation; GO:0030246: carbohydrate binding	IPR000719: Protein kinase domain; IPR001220: Legume lectin domain; IPR008271: Serine/threonine-protein kinase, active site; IPR011009: Protein kinase-like domain superfamily; IPR013320: Concanavalin A-like lectin/glucanase domain superfamily; IPR017441: Protein kinase, ATP binding site	-
Npp.01A007180.1	L-type lectin-domain containing receptor kinase IV.1; hypothetical protein SETIT_2G365200v2	L-type lectin-domain containing receptor kinase IV.1	L-type lectin-domain containing receptor kinase IV.1	-	GO:0004672: protein kinase activity; GO:0005524: ATP binding; GO:0006468: protein phosphorylation; GO:0030246: carbohydrate binding	IPR000719: Protein kinase domain; IPR001220: Legume lectin domain; IPR008271: Serine/threonine-protein kinase, active site; IPR011009: Protein kinase-like domain superfamily; IPR013320: Concanavalin A-like lectin/glucanase domain superfamily; IPR017441: Protein kinase, ATP binding site; IPR019825: Legume lectin, beta chain, Mn/Ca-binding site	-
Npp.01A007190.1	L-type lectin-domain containing receptor kinase IV.1; hypothetical protein SORBI_3001G074900	L-type lectin-domain containing receptor kinase IV.1	L-type lectin-domain containing receptor kinase IV.1	-	GO:0004672: protein kinase activity; GO:0005524: ATP binding; GO:0006468: protein phosphorylation; GO:0030246: carbohydrate binding	IPR000719: Protein kinase domain; IPR001220: Legume lectin domain; IPR008271: Serine/threonine-protein kinase, active site; IPR011009: Protein kinase-like domain superfamily; IPR013320: Concanavalin A-like lectin/glucanase domain superfamily; IPR017441: Protein kinase, ATP binding site	-
Npp.01A007200.1	L-type lectin-domain containing receptor kinase IV.1; hypothetical protein SORBI_3001G075000	L-type lectin-domain containing receptor kinase IV.1	L-type lectin-domain containing receptor kinase IV.1	-	GO:0004672: protein kinase activity; GO:0005524: ATP binding; GO:0006468: protein phosphorylation; GO:0030246: carbohydrate binding	IPR000719: Protein kinase domain; IPR001220: Legume lectin domain; IPR008271: Serine/threonine-protein kinase, active site; IPR011009: Protein kinase-like domain superfamily; IPR013320: Concanavalin A-like lectin/glucanase domain superfamily; IPR017441: Protein kinase, ATP binding site	-
Npp.01A007210.1	homeobox protein rough sheath 1	Homeobox protein knotted-1-like 12	Homeobox protein knotted-1-like 12	-	GO:0000981: RNA polymerase II transcription factor activity, sequence-specific DNA binding; GO:0003677: DNA binding; GO:0006355: regulation of transcription, DNA-templated	IPR001356: Homeobox domain; IPR005539: ELK domain; IPR008422: Homeobox KN domain; IPR009057: Homeobox-like domain superfamily; IPR017970: Homeobox, conserved site	-
Npp.01A007220.1	ethylene-responsive transcription factor 1; hypothetical protein C2845_PM02G35440	Ethylene-responsive transcription factor ERF073	Ethylene-responsive transcription factor ERF073	-	GO:0003677: DNA binding; GO:0003700: DNA binding transcription factor activity; GO:0006355: regulation of transcription, DNA-templated	IPR001471: AP2/ERF domain; IPR016177: DNA-binding domain superfamily; IPR036955: AP2/ERF domain superfamily	K09286: EREBP;EREBP-like factor
Npp.01A007230.1	hypothetical protein SORBI_3005G226600	RING-H2 finger protein ATL72	RING-H2 finger protein ATL72	-	-	IPR001841: Zinc finger, RING-type; IPR013083: Zinc finger, RING/FYVE/PHD-type	-
Npp.01A007240.1	putative AP2/EREBP transcription factor superfamily protein	Ethylene-responsive transcription factor 1	Ethylene-responsive transcription factor 1	-	-	-	K09286: EREBP;EREBP-like factor
Npp.01A007250.1	Osmotin-like protein	Osmotin-like protein	Osmotin-like protein	-	-	IPR001938: Thaumatin family; IPR037176: Osmotin/thaumatin-like superfamily	-
Npp.01A007270.1	pumilio homolog 1, partial; hypothetical protein SORBI_3005G227151	Pumilio homolog 12; Pumilio domain-containing protein C6G9.14	Pumilio homolog 12; Pumilio domain-containing protein C6G9.14	-	GO:0003723: RNA binding	IPR001313: Pumilio RNA-binding repeat; IPR011989: Armadillo-like helical; IPR016024: Armadillo-type fold; IPR033133: Pumilio homology domain; IPR033712: Pumilio, RNA binding domain	K17943: PUM;pumilio RNA-binding family
Npp.01A007280.1	putative disease resistance protein	Putative disease resistance protein At1g50180	Putative disease resistance protein At1g50180	-	GO:0043531: ADP binding	IPR002182: NB-ARC; IPR027417: P-loop containing nucleoside triphosphate hydrolase; IPR038005: Virus X resistance protein-like, coiled-coil domain; IPR041118: Rx, N-terminal	-
Npp.01A007290.1	ervatamin-B	Cysteine proteinase EP-B 1	Cysteine proteinase EP-B 1	-	GO:0006508: proteolysis; GO:0008234: cysteine-type peptidase activity	IPR000668: Peptidase C1A, papain C-terminal; IPR013201: Cathepsin propeptide inhibitor domain (I29); IPR025660: Cysteine peptidase, histidine active site; IPR025661: Cysteine peptidase, asparagine active site; IPR038765: Papain-like cysteine peptidase superfamily; IPR039417: Papain-like cysteine endopeptidase	-
Npp.01A007300.1	-	RING-H2 finger protein ATL32	RING-H2 finger protein ATL32	-	-	-	-
Npp.01A007310.1	hypothetical protein SORBI_3005G227700; RING-H2 finger protein ATL33-like isoform X1; E3 ubiquitin-protein ligase EL5	Putative RING-H2 finger protein ATL61	Putative RING-H2 finger protein ATL61	-	-	IPR001841: Zinc finger, RING-type; IPR013083: Zinc finger, RING/FYVE/PHD-type	-
Npp.01A007320.1	hypothetical protein SORBI_3005G227700; E3 ubiquitin-protein ligase EL5	-	-	-	-	IPR001841: Zinc finger, RING-type; IPR013083: Zinc finger, RING/FYVE/PHD-type	-
Npp.01A007340.1	uncharacterized protein LOC100193058 isoform X1	Uncharacterized mitochondrial protein AtMg00810	Uncharacterized mitochondrial protein AtMg00810	-	-	IPR043502: DNA/RNA polymerase superfamily	-
Npp.01A007350.1	RING-H2 finger protein ATL39; hypothetical protein SORBI_3005G227300	RING-H2 finger protein ATL22	RING-H2 finger protein ATL22	-	-	IPR001841: Zinc finger, RING-type; IPR013083: Zinc finger, RING/FYVE/PHD-type	-
Npp.01A007360.1	protein STIG1	-	-	-	-	IPR006969: Stigma-specific protein Stig1	-
Npp.01A007370.1	RING-H2 finger protein ATL39; hypothetical protein GQ55_8G260300; E3 ubiquitin-protein ligase EL5	RING-H2 finger protein ATL64	RING-H2 finger protein ATL64	-	-	IPR001841: Zinc finger, RING-type; IPR013083: Zinc finger, RING/FYVE/PHD-type	-
Npp.01A007380.1	Vacuolar protein sorting-associated protein 2 homolog 1	Charged multivesicular body protein 2a homolog 2	Charged multivesicular body protein 2a homolog 2	KOG3230: Vacuolar assembly/sorting protein DID4; KOG3231: Predicted assembly/vacuolar sorting protein	GO:0007034: vacuolar transport	IPR005024: Snf7 family	K12191: CHMP2A;charged multivesicular body protein 2A
Npp.01A007390.1	uncharacterized protein LOC8086027	-	-	-	-	-	-
Npp.01A007400.1	BTB/POZ domain-containing protein At3g50780	BTB/POZ domain-containing protein At3g50780	BTB/POZ domain-containing protein At3g50780	-	GO:0005515: protein binding	IPR000210: BTB/POZ domain; IPR011333: SKP1/BTB/POZ domain superfamily; IPR038920: BTB/POZ domain-containing protein	-
Npp.01A007410.1	putative calcium-binding protein CML41	Probable calcium-binding protein CML41; Calmodulin-like protein 2	Probable calcium-binding protein CML41; Calmodulin-like protein 2	-	GO:0005509: calcium ion binding	IPR002048: EF-hand domain; IPR011992: EF-hand domain pair; IPR018247: EF-Hand 1, calcium-binding site	K13448: CML;calcium-binding protein CML
Npp.01A007420.1	cytochrome c biogenesis protein CCS1, chloroplastic	Cytochrome c biogenesis protein CCS1, chloroplastic	Cytochrome c biogenesis protein CCS1, chloroplastic	-	-	IPR007816: ResB-like domain; IPR023494: Cytochrome c biogenesis protein Ccs1/CcsB	K07399: resB,ccs1;cytochrome c biogenesis protein
Npp.01A007430.1	ocs element-binding factor 1; hypothetical protein BAE44_0003606	-	-	-	GO:0003700: DNA binding transcription factor activity; GO:0006355: regulation of transcription, DNA-templated	IPR004827: Basic-leucine zipper domain	-
Npp.01A007450.1	heterogeneous nuclear ribonucleoprotein 1 isoform X1	RNA-binding protein Musashi homolog 2; Heterogeneous nuclear ribonucleoprotein 1	RNA-binding protein Musashi homolog 2; Heterogeneous nuclear ribonucleoprotein 1	-	GO:0003676: nucleic acid binding	IPR000504: RNA recognition motif domain; IPR012677: Nucleotide-binding alpha-beta plait domain superfamily; IPR035979: RNA-binding domain superfamily	-
Npp.01A007460.1	AP2-like ethylene-responsive transcription factor ANT	AP2-like ethylene-responsive transcription factor CRL5	AP2-like ethylene-responsive transcription factor CRL5	-	GO:0003677: DNA binding; GO:0003700: DNA binding transcription factor activity; GO:0006355: regulation of transcription, DNA-templated	IPR001471: AP2/ERF domain; IPR016177: DNA-binding domain superfamily; IPR036955: AP2/ERF domain superfamily	K09285: OVM,ANT;AP2-like factor,ANT lineage
Npp.01A007470.1	probable xyloglucan glycosyltransferase 9	Probable xyloglucan glycosyltransferase 9	Probable xyloglucan glycosyltransferase 9	-	-	IPR001173: Glycosyltransferase 2-like; IPR029044: Nucleotide-diphospho-sugar transferases	-
Npp.01A007480.1	uncharacterized protein LOC100191920	-	-	-	-	-	-
Npp.01A007490.1	transcription factor MYB4; myb-related protein Hv1	Transcription factor MYB36	Transcription factor MYB36	-	-	IPR001005: SANT/Myb domain; IPR009057: Homeobox-like domain superfamily; IPR017930: Myb domain	K09422: MYBP;transcription factor MYB,plant
Npp.01A007500.1	BTB/POZ domain-containing protein At3g50780	BTB/POZ domain-containing protein At3g50780	BTB/POZ domain-containing protein At3g50780	-	GO:0005515: protein binding	IPR000210: BTB/POZ domain; IPR011333: SKP1/BTB/POZ domain superfamily; IPR038920: BTB/POZ domain-containing protein	-
Npp.01A007510.1	30S ribosomal protein S9	30S ribosomal protein S9, chloroplastic	30S ribosomal protein S9, chloroplastic	KOG1697: Mitochondrial/chloroplast ribosomal protein S9	GO:0003735: structural constituent of ribosome; GO:0005840: ribosome; GO:0006412: translation	IPR000754: Ribosomal protein S9; IPR014721: Ribosomal protein S5 domain 2-type fold, subgroup; IPR020568: Ribosomal protein S5 domain 2-type fold; IPR020574: Ribosomal protein S9, conserved site; IPR023035: Ribosomal protein S9, bacterial/plastid	K02996: RP-S9,MRPS9,rpsI;small subunit ribosomal protein S9
Npp.01A007530.1	uncharacterized protein LOC8083965 isoform X1	-	-	-	-	IPR006852: Protein of unknown function DUF616	-
Npp.01A007540.1	30S ribosomal protein S9	30S ribosomal protein S9, chloroplastic	30S ribosomal protein S9, chloroplastic	KOG1697: Mitochondrial/chloroplast ribosomal protein S9	-	-	K02996: RP-S9,MRPS9,rpsI;small subunit ribosomal protein S9
Npp.01A007550.1	uncharacterized protein LOC8083965 isoform X1	-	-	-	-	IPR006852: Protein of unknown function DUF616	-
Npp.01A007560.1	uncharacterized protein LOC8083966 isoform X1	-	-	-	-	IPR006869: Domain of unknown function DUF547; IPR025757: Ternary complex factor MIP1, leucine-zipper	-
Npp.01A007570.1	CASP-like protein 5C1 isoform X1; hypothetical protein	CASP-like protein 5C1	CASP-like protein 5C1	-	-	IPR006702: Casparian strip membrane protein domain	-
Npp.01A007580.1	cold-regulated 413 plasma membrane protein 2	Cold-regulated 413 plasma membrane protein 2	Cold-regulated 413 plasma membrane protein 2	-	GO:0016021: integral component of membrane	IPR008892: Cold-regulated 413 protein	-
Npp.01A007590.1	putative pentatricopeptide repeat-containing protein At5g52630	Pentatricopeptide repeat-containing protein DWY1, chloroplastic	Pentatricopeptide repeat-containing protein DWY1, chloroplastic	-	GO:0008270: zinc ion binding	IPR032867: DYW domain	-
Npp.01A007600.1	BTB/POZ domain-containing protein At5g66560	BTB/POZ domain-containing protein At5g66560	BTB/POZ domain-containing protein At5g66560	-	-	-	-
Npp.01A007610.1	hypothetical protein Zm00014a_035105; thioredoxin-like protein HCF164, chloroplastic	-	-	-	-	-	-
Npp.01A007620.1	allene oxide synthase 1, chloroplastic	Allene oxide synthase 1, chloroplastic	Allene oxide synthase 1, chloroplastic	-	GO:0004497: monooxygenase activity; GO:0005506: iron ion binding; GO:0016705: oxidoreductase activity, acting on paired donors, with incorporation or reduction of molecular oxygen; GO:0020037: heme binding; GO:0055114: oxidation-reduction process	IPR001128: Cytochrome P450; IPR002403: Cytochrome P450, E-class, group IV; IPR036396: Cytochrome P450 superfamily	K01723: AOS;hydroperoxide dehydratase [EC:4.2.1.92]
Npp.01A007630.1	proteasome assembly chaperone 2	Proteasome assembly chaperone 2	Proteasome assembly chaperone 2	KOG3112: Uncharacterized conserved protein	-	IPR016562: Proteasome assembly chaperone 2, eukaryotic; IPR019151: Proteasome assembly chaperone 2	K11876: PSMG2,PAC2;proteasome assembly chaperone 2
Npp.01A007640.1	probable transcription factor GLK2	Probable transcription factor KAN4	Probable transcription factor KAN4	-	-	IPR001005: SANT/Myb domain; IPR006447: Myb domain, plants; IPR009057: Homeobox-like domain superfamily	-
Npp.01A007650.1	transmembrane protein 147	Transmembrane protein 147	Transmembrane protein 147	KOG3236: Predicted membrane protein	-	IPR019164: Transmembrane protein 147	-
Npp.01A007660.1	uncharacterized protein LOC8083970	-	-	-	-	-	-
Npp.01A007680.1	uncharacterized protein LOC8086188	Molybdenum cofactor sulfurase	Molybdenum cofactor sulfurase	KOG2142: Molybdenum cofactor sulfurase	GO:0003824: catalytic activity	IPR015421: Pyridoxal phosphate-dependent transferase, major domain; IPR015422: Pyridoxal phosphate-dependent transferase domain 1; IPR015424: Pyridoxal phosphate-dependent transferase	-
Npp.01A007690.1	hypothetical protein SHCRBa_028_E10_F_330; CCG-binding protein 1	-	-	-	GO:0010183: pollen tube guidance; GO:0036033: mediator complex binding	IPR037502: CCG-binding protein 1	-
Npp.01A007700.1	nuclear pore complex protein NUP58 isoform X1	-	-	-	GO:0005643: nuclear pore; GO:0006913: nucleocytoplasmic transport; GO:0008139: nuclear localization sequence binding; GO:0017056: structural constituent of nuclear pore	IPR024882: Nucleoporin p58/p45	-
Npp.01A007710.1	probable thylakoidal processing peptidase 2, chloroplastic	Probable signal peptidase I-1	Probable signal peptidase I-1	KOG0171: Mitochondrial inner membrane protease, subunit IMP1	GO:0004252: serine-type endopeptidase activity; GO:0006508: proteolysis; GO:0016020: membrane; GO:0016021: integral component of membrane	IPR000223: Peptidase S26A, signal peptidase I; IPR019533: Peptidase S26; IPR019757: Peptidase S26A, signal peptidase I, lysine active site; IPR019758: Peptidase S26A, signal peptidase I, conserved site; IPR036286: LexA/Signal peptidase-like superfamily	K03100: lepB;signal peptidase I [EC:3.4.21.89]
Npp.01A007720.1	uncharacterized protein LOC8083973	-	-	-	-	-	-
Npp.01A007730.1	serine/threonine-protein kinase	Serine/threonine-protein kinase Aurora-3	Serine/threonine-protein kinase Aurora-3	KOG0580: Serine/threonine protein kinase	GO:0000226: microtubule cytoskeleton organization; GO:0000278: mitotic cell cycle; GO:0004672: protein kinase activity; GO:0005524: ATP binding; GO:0006468: protein phosphorylation; GO:0007059: chromosome segregation; GO:0032465: regulation of cytokinesis	IPR000719: Protein kinase domain; IPR008271: Serine/threonine-protein kinase, active site; IPR011009: Protein kinase-like domain superfamily; IPR017441: Protein kinase, ATP binding site; IPR030614: Serine/threonine-protein kinase Aurora-3; IPR030616: Aurora kinase	K08850: AURKX;aurora kinase,other [EC:2.7.11.1]
Npp.01A007740.1	Dof-type zinc finger protein	-	-	-	GO:0003677: DNA binding; GO:0006355: regulation of transcription, DNA-templated	IPR003851: Zinc finger, Dof-type	-
Npp.01A007750.1	serine/threonine-protein kinase SAPK8	Serine/threonine-protein kinase SAPK8	Serine/threonine-protein kinase SAPK8	-	GO:0004672: protein kinase activity; GO:0005524: ATP binding; GO:0006468: protein phosphorylation	IPR000719: Protein kinase domain; IPR008271: Serine/threonine-protein kinase, active site; IPR011009: Protein kinase-like domain superfamily; IPR017441: Protein kinase, ATP binding site	K14498: SNRK2;serine/threonine-protein kinase SRK2 [EC:2.7.11.1]
Npp.01A007760.1	transcription factor HHO5-like	Transcription factor NIGTH1	Transcription factor NIGTH1	-	-	IPR001005: SANT/Myb domain; IPR006447: Myb domain, plants; IPR009057: Homeobox-like domain superfamily; IPR017930: Myb domain	-
Npp.01A007780.1	upstream activation factor subunit spp27; SWIB/MDM2 domain containing protein	Upstream activation factor subunit spp27	Upstream activation factor subunit spp27	KOG1946: RNA polymerase I transcription factor UAF	-	-	K15223: UAF30,SPP27;upstream activation factor subunit UAF30
Npp.01A007790.1	zinc finger protein 1	Zinc finger protein 1	Zinc finger protein 1	-	-	IPR013087: Zinc finger C2H2-type; IPR036236: Zinc finger C2H2 superfamily	-
Npp.01A007810.1	glutamyl-tRNA(Gln) amidotransferase subunit B, chloroplastic/mitochondrial	Glutamyl-tRNA(Gln) amidotransferase subunit B, chloroplastic/mitochondrial	Glutamyl-tRNA(Gln) amidotransferase subunit B, chloroplastic/mitochondrial	KOG2438: Glutamyl-tRNA amidotransferase subunit B	GO:0016884: carbon-nitrogen ligase activity, with glutamine as amido-N-donor	IPR003789: Aspartyl/glutamyl-tRNA amidotransferase subunit B-like; IPR004413: Aspartyl/glutamyl-tRNA(Asn/Gln) amidotransferase, B subunit; IPR006075: Aspartyl/Glutamyl-tRNA(Gln) amidotransferase, subunit B/E, catalytic; IPR014746: Glutamine synthetase/guanido kinase, catalytic domain; IPR017958: Glutamyl-tRNA(Gln) amidotransferase, subunit B, conserved site; IPR017959: Aspartyl/glutamyl-tRNA(Asn/…	K02434: gatB,PET112;aspartyl-tRNA(Asn)/glutamyl-tRNA(Gln) amidotransferase subunit B [EC:6.3.5.6 6.3.5.7]
Npp.01A007820.1	dr1-associated corepressor	Transcription regulator complex subunit bur6	Transcription regulator complex subunit bur6	KOG1659: Class 2 transcription repressor NC2, alpha subunit (DRAP1)	GO:0046982: protein heterodimerization activity	IPR003958: Transcription factor CBF/NF-Y/archaeal histone domain; IPR009072: Histone-fold	K21752: DRAP1,NC2-alpha;Dr1-associated corepressor
Npp.01A007830.1	hypothetical protein Zm00014a_029437	-	-	-	-	IPR019098: Histone chaperone domain CHZ; IPR037647: HIRA-interacting protein 3	-
Npp.01A007840.1	hypothetical protein Zm00014a_044360; uncharacterized protein LOC100279750	-	-	-	-	IPR033371: Arginine and glutamate-rich protein 1	K13173: ARGLU1;arginine and glutamate-rich protein 1
Npp.01A007850.1	uncharacterized protein At3g49140-like	-	-	-	-	IPR037119: Haem oxygenase HugZ-like superfamily	-
Npp.01A007860.1	transportin MOS14 isoform X2	Transportin-3	Transportin-3	-	-	IPR011989: Armadillo-like helical; IPR013598: Exportin-1/Importin-beta-like; IPR016024: Armadillo-type fold	K15436: TRPO3,MTR10;transportin-3
Npp.01A007870.1	probable N-acetyltransferase HLS1	Probable N-acetyltransferase HLS1	Probable N-acetyltransferase HLS1	-	GO:0008080: N-acetyltransferase activity	IPR000182: GNAT domain; IPR016181: Acyl-CoA N-acyltransferase	-
Npp.01A007880.1	hypothetical protein C2845_PM11G15090	-	-	-	GO:0003676: nucleic acid binding; GO:0004523: RNA-DNA hybrid ribonuclease activity	IPR002156: Ribonuclease H domain; IPR012337: Ribonuclease H-like superfamily; IPR036397: Ribonuclease H superfamily	-
Npp.01A007890.1	PREDICTED: protein transport protein Sec61 subunit alpha-like isoform X1	Protein transport protein Sec61 subunit alpha	Protein transport protein Sec61 subunit alpha	KOG1373: Transport protein Sec61, alpha subunit	GO:0015031: protein transport; GO:0016020: membrane	IPR002208: SecY/SEC61-alpha family; IPR019561: Translocon Sec61/SecY, plug domain; IPR023201: SecY domain superfamily; IPR030659: SecY conserved site	K10956: SEC61A;protein transport protein SEC61 subunit alpha
Npp.01A007900.1	Casein kinase II subunit alpha-4 chloroplastic	Casein kinase II subunit alpha-4, chloroplastic	Casein kinase II subunit alpha-4, chloroplastic	KOG0668: Casein kinase II, alpha subunit	GO:0004672: protein kinase activity; GO:0005524: ATP binding; GO:0006468: protein phosphorylation	IPR000719: Protein kinase domain; IPR008271: Serine/threonine-protein kinase, active site; IPR011009: Protein kinase-like domain superfamily; IPR017441: Protein kinase, ATP binding site	K03097: CSNK2A;casein kinase II subunit alpha [EC:2.7.11.1]
Npp.01A007910.1	thaumatin-like protein 1b	Thaumatin-like protein 1	Thaumatin-like protein 1	-	-	IPR001938: Thaumatin family; IPR037176: Osmotin/thaumatin-like superfamily	-
Npp.01A007920.1	serine/threonine-protein phosphatase 7 long form homolog isoform X1; uncharacterized protein LOC112876334 isoform X2	-	-	-	-	IPR019557: Aminotransferase-like, plant mobile domain	-
Npp.01A007930.1	QWRF motif-containing protein 2	QWRF motif-containing protein 2	QWRF motif-containing protein 2	-	-	IPR007573: QWRF family	-
Npp.01A007940.1	hypothetical protein PAHAL_6G095500	-	-	-	-	IPR026960: Reverse transcriptase zinc-binding domain	-
Npp.01A007960.1	uncharacterized protein LOC8086197	-	-	-	GO:0070461: SAGA-type complex	IPR024738: Transcriptional coactivator Hfi1/Transcriptional adapter 1	-
Npp.01A007970.1	peroxidase 35	Peroxidase 35	Peroxidase 35	-	GO:0004601: peroxidase activity; GO:0006979: response to oxidative stress; GO:0020037: heme binding; GO:0042744: hydrogen peroxide catabolic process; GO:0055114: oxidation-reduction process	IPR000823: Plant peroxidase; IPR002016: Haem peroxidase; IPR010255: Haem peroxidase superfamily; IPR019793: Peroxidases heam-ligand binding site; IPR019794: Peroxidase, active site; IPR033905: Secretory peroxidase	K00430: E1.11.1.7;peroxidase [EC:1.11.1.7]
Npp.01A007980.1	peroxidase 50	Peroxidase 50	Peroxidase 50	-	GO:0004601: peroxidase activity; GO:0006979: response to oxidative stress; GO:0020037: heme binding; GO:0042744: hydrogen peroxide catabolic process; GO:0055114: oxidation-reduction process	IPR000823: Plant peroxidase; IPR002016: Haem peroxidase; IPR010255: Haem peroxidase superfamily; IPR019793: Peroxidases heam-ligand binding site; IPR019794: Peroxidase, active site; IPR033905: Secretory peroxidase	K00430: E1.11.1.7;peroxidase [EC:1.11.1.7]
Npp.01A007990.1	uncharacterized protein LOC8060586	-	-	-	-	-	-
Npp.01A008000.1	uncharacterized protein LOC8083980; hypothetical protein GQ55_9G075000	-	-	-	-	-	-
Npp.01A008010.1	-	-	-	-	GO:0003676: nucleic acid binding; GO:0008270: zinc ion binding	IPR001878: Zinc finger, CCHC-type; IPR036875: Zinc finger, CCHC-type superfamily	-
Npp.01A008020.1	casein kinase II subunit alpha-2	Casein kinase II subunit alpha-2	Casein kinase II subunit alpha-2	KOG0668: Casein kinase II, alpha subunit	GO:0004672: protein kinase activity; GO:0005524: ATP binding; GO:0006468: protein phosphorylation	IPR000719: Protein kinase domain; IPR008271: Serine/threonine-protein kinase, active site; IPR011009: Protein kinase-like domain superfamily; IPR017441: Protein kinase, ATP binding site	K03097: CSNK2A;casein kinase II subunit alpha [EC:2.7.11.1]
Npp.01A008030.1	probable prolyl 4-hydroxylase 9	Probable prolyl 4-hydroxylase 9	Probable prolyl 4-hydroxylase 9	KOG1591: Prolyl 4-hydroxylase alpha subunit	GO:0005506: iron ion binding; GO:0016705: oxidoreductase activity, acting on paired donors, with incorporation or reduction of molecular oxygen; GO:0031418: L-ascorbic acid binding; GO:0055114: oxidation-reduction process	IPR005123: Oxoglutarate/iron-dependent dioxygenase; IPR006620: Prolyl 4-hydroxylase, alpha subunit	K00472: P4HA;prolyl 4-hydroxylase [EC:1.14.11.2]
Npp.01A008040.1	uncharacterized protein LOC8086202	-	-	-	-	-	-
Npp.01A008050.1	subtilisin-like protease SBT1.7	Subtilisin-like protease SBT1.7	Subtilisin-like protease SBT1.7	-	GO:0004252: serine-type endopeptidase activity; GO:0006508: proteolysis	IPR000209: Peptidase S8/S53 domain; IPR003137: PA domain; IPR010259: Peptidase S8 propeptide/proteinase inhibitor I9; IPR015500: Peptidase S8, subtilisin-related; IPR023828: Peptidase S8, subtilisin, Ser-active site; IPR034197: Cucumisin-like catalytic domain; IPR036852: Peptidase S8/S53 domain superfamily; IPR037045: Peptidase S8 propeptide/proteinase inhibitor I9 superfamily; IPR041469: Subtili…	-
Npp.01A008060.1	subtilisin-like protease SBT1.7	Subtilisin-like protease SBT1.7	Subtilisin-like protease SBT1.7	-	GO:0004252: serine-type endopeptidase activity; GO:0006508: proteolysis	IPR000209: Peptidase S8/S53 domain; IPR003137: PA domain; IPR010259: Peptidase S8 propeptide/proteinase inhibitor I9; IPR015500: Peptidase S8, subtilisin-related; IPR023828: Peptidase S8, subtilisin, Ser-active site; IPR034197: Cucumisin-like catalytic domain; IPR036852: Peptidase S8/S53 domain superfamily; IPR037045: Peptidase S8 propeptide/proteinase inhibitor I9 superfamily; IPR041469: Subtili…	-
Npp.01A008070.1	hypothetical protein C2845_PM14G02490	-	-	-	-	-	-
Npp.01A008080.1	hypothetical protein SORBI_3003G077001; uncharacterized protein LOC112896852	-	-	-	-	IPR011989: Armadillo-like helical; IPR016024: Armadillo-type fold	-
Npp.01A008090.1	Unknown protein	-	-	KOG4585: Predicted transposase	-	IPR027806: Harbinger transposase-derived nuclease domain	-
Npp.01A008100.1	hypothetical protein OsJ_26506; uncharacterized protein LOC103652464	-	-	-	-	IPR004332: Transposase, MuDR, plant	-
Npp.01A008110.1	transcription initiation factor TFIID	Transcription initiation factor TFIID subunit 6	Transcription initiation factor TFIID subunit 6	KOG2549: Transcription initiation factor TFIID, subunit TAF6 (also component of histone acetyltransferase SAGA)	GO:0000124: SAGA complex; GO:0005669: transcription factor TFIID complex; GO:0006367: transcription initiation from RNA polymerase II promoter; GO:0046695: SLIK (SAGA-like) complex; GO:0046982: protein heterodimerization activity	IPR004823: TATA box binding protein associated factor (TAF); IPR009072: Histone-fold; IPR011442: TAF6, C-terminal HEAT repeat domain; IPR016024: Armadillo-type fold; IPR037796: Transcription initiation factor TFIID subunit 6	K03131: TAF6;transcription initiation factor TFIID subunit 6
Npp.01A008120.1	pentatricopeptide repeat-containing protein At1g77360, mitochondrial	Pentatricopeptide repeat-containing protein At1g77360, mitochondrial	Pentatricopeptide repeat-containing protein At1g77360, mitochondrial	-	GO:0005515: protein binding	IPR002885: Pentatricopeptide repeat; IPR011990: Tetratricopeptide-like helical domain superfamily	-
Npp.01A008130.1	protein arginine N-methyltransferase 2	Protein arginine N-methyltransferase 2	Protein arginine N-methyltransferase 2	KOG1709: Guanidinoacetate methyltransferase and related proteins	GO:0005515: protein binding; GO:0016274: protein-arginine N-methyltransferase activity	IPR002110: Ankyrin repeat; IPR017408: Arginine N-methyltransferase 2; IPR020683: Ankyrin repeat-containing domain; IPR026480: Arginine N-methyltransferase 2-like domain; IPR029063: S-adenosyl-L-methionine-dependent methyltransferase; IPR036770: Ankyrin repeat-containing domain superfamily	K18477: RMT2;type IV protein arginine methyltransferase [EC:2.1.1.322]
Npp.01A008160.1	probable protein phosphatase 2C 34	Probable protein phosphatase 2C 34	Probable protein phosphatase 2C 34	KOG0700: Protein phosphatase 2C/pyruvate dehydrogenase (lipoamide) phosphatase	GO:0004722: protein serine/threonine phosphatase activity; GO:0006470: protein dephosphorylation; GO:0043169: cation binding	IPR000222: PPM-type phosphatase, divalent cation binding; IPR001932: PPM-type phosphatase domain; IPR015655: Protein phosphatase 2C family; IPR036457: PPM-type phosphatase domain superfamily	K01102: PDP;pyruvate dehydrogenase phosphatase [EC:3.1.3.43]
Npp.01A008170.1	-	Gibberellin-regulated protein 8	Gibberellin-regulated protein 8	KOG1946: RNA polymerase I transcription factor UAF	GO:0005515: protein binding	IPR003121: SWIB/MDM2 domain; IPR003854: Gibberellin regulated protein; IPR019835: SWIB domain; IPR036885: SWIB/MDM2 domain superfamily	-
Npp.01A008180.1	uncharacterized protein LOC8085911; aspartate-semialdehyde dehydrogenase	Aspartate-semialdehyde dehydrogenase	Aspartate-semialdehyde dehydrogenase	KOG4777: Aspartate-semialdehyde dehydrogenase	GO:0004073: aspartate-semialdehyde dehydrogenase activity; GO:0009086: methionine biosynthetic process; GO:0009088: threonine biosynthetic process; GO:0009089: lysine biosynthetic process via diaminopimelate; GO:0009097: isoleucine biosynthetic process; GO:0046983: protein dimerization activity; GO:0050661: NADP binding; GO:0051287: NAD binding; GO:0055114: oxidation-reduction process	IPR000534: Semialdehyde dehydrogenase, NAD-binding; IPR005986: Aspartate-semialdehyde dehydrogenase, beta-type; IPR012080: Aspartate-semialdehyde dehydrogenase; IPR012280: Semialdehyde dehydrogenase, dimerisation domain; IPR036291: NAD(P)-binding domain superfamily	K00133: asd;aspartate-semialdehyde dehydrogenase [EC:1.2.1.11]
Npp.01A008190.1	zinc finger protein ZPR1	Zinc finger protein ZPR1	Zinc finger protein ZPR1	KOG2703: C4-type Zn-finger protein	GO:0008270: zinc ion binding	IPR004457: Zinc finger, ZPR1-type; IPR040141: ZPR1 family; IPR042451: ZPR1, A/B domain; IPR042452: ZPR1, zinc finger domain	K06874: K06874;zinc finger protein
Npp.01A008200.1	TIP41-like protein	TIP41-like protein	TIP41-like protein	KOG3224: Uncharacterized conserved protein	GO:0043666: regulation of phosphoprotein phosphatase activity	IPR007303: TIP41-like protein	K17607: TIPRL,TIP41;type 2A phosphatase activator TIP41
Npp.01A008210.1	isoflavone 2&apos;-hydroxylase	Cytochrome P450 81Q32	Cytochrome P450 81Q32	-	GO:0005506: iron ion binding; GO:0016705: oxidoreductase activity, acting on paired donors, with incorporation or reduction of molecular oxygen; GO:0020037: heme binding; GO:0055114: oxidation-reduction process	IPR001128: Cytochrome P450; IPR002401: Cytochrome P450, E-class, group I; IPR017972: Cytochrome P450, conserved site; IPR036396: Cytochrome P450 superfamily	-
Npp.01A008220.1	isoflavone 2&apos;-hydroxylase	Cytochrome P450 81Q32	Cytochrome P450 81Q32	-	GO:0005506: iron ion binding; GO:0016705: oxidoreductase activity, acting on paired donors, with incorporation or reduction of molecular oxygen; GO:0020037: heme binding; GO:0055114: oxidation-reduction process	IPR001128: Cytochrome P450; IPR002401: Cytochrome P450, E-class, group I; IPR017972: Cytochrome P450, conserved site; IPR036396: Cytochrome P450 superfamily	-
Npp.01A008230.1	isoflavone 2&apos;-hydroxylase	Cytochrome P450 81Q32	Cytochrome P450 81Q32	-	GO:0005506: iron ion binding; GO:0016705: oxidoreductase activity, acting on paired donors, with incorporation or reduction of molecular oxygen; GO:0020037: heme binding; GO:0055114: oxidation-reduction process	IPR001128: Cytochrome P450; IPR002401: Cytochrome P450, E-class, group I; IPR017972: Cytochrome P450, conserved site; IPR036396: Cytochrome P450 superfamily	-
Npp.01A008240.1	isoflavone 3&apos;-hydroxylase; cytochrome P450 CYP81A4	Cytochrome P450 81F3	Cytochrome P450 81F3	-	GO:0005506: iron ion binding; GO:0016705: oxidoreductase activity, acting on paired donors, with incorporation or reduction of molecular oxygen; GO:0020037: heme binding; GO:0055114: oxidation-reduction process	IPR001128: Cytochrome P450; IPR002401: Cytochrome P450, E-class, group I; IPR036396: Cytochrome P450 superfamily	-
Npp.01A008250.1	isoflavone 3&apos;-hydroxylase; cytochrome P450 CYP81A4	Cytochrome P450 81C13	Cytochrome P450 81C13	-	GO:0005506: iron ion binding; GO:0016705: oxidoreductase activity, acting on paired donors, with incorporation or reduction of molecular oxygen; GO:0020037: heme binding; GO:0055114: oxidation-reduction process	IPR001128: Cytochrome P450; IPR002401: Cytochrome P450, E-class, group I; IPR017972: Cytochrome P450, conserved site; IPR036396: Cytochrome P450 superfamily	-
Npp.01A008260.1	isoflavone 2&apos;-hydroxylase	Cytochrome P450 81Q32	Cytochrome P450 81Q32	-	GO:0005506: iron ion binding; GO:0016705: oxidoreductase activity, acting on paired donors, with incorporation or reduction of molecular oxygen; GO:0020037: heme binding; GO:0055114: oxidation-reduction process	IPR001128: Cytochrome P450; IPR002401: Cytochrome P450, E-class, group I; IPR017972: Cytochrome P450, conserved site; IPR036396: Cytochrome P450 superfamily	-
Npp.01A008270.1	transcription factor bHLH123 isoform X1; hypothetical protein Zm00014a_029380	Transcription factor bHLH113	Transcription factor bHLH113	-	GO:0046983: protein dimerization activity	IPR011598: Myc-type, basic helix-loop-helix (bHLH) domain; IPR036638: Helix-loop-helix DNA-binding domain superfamily	-
Npp.01A008280.1	probable receptor-like protein kinase At5g61350	Probable receptor-like protein kinase At5g61350	Probable receptor-like protein kinase At5g61350	-	GO:0004672: protein kinase activity; GO:0005524: ATP binding; GO:0006468: protein phosphorylation	IPR000719: Protein kinase domain; IPR001245: Serine-threonine/tyrosine-protein kinase, catalytic domain; IPR008271: Serine/threonine-protein kinase, active site; IPR011009: Protein kinase-like domain superfamily; IPR017441: Protein kinase, ATP binding site; IPR024788: Malectin-like domain	-
Npp.01A008290.1	origin of replication complex subunit 1; hypothetical protein SORBI_3001G082800	Origin of replication complex subunit 1	Origin of replication complex subunit 1	KOG2543: Origin recognition complex, subunit 5	GO:0000808: origin recognition complex; GO:0005634: nucleus; GO:0006260: DNA replication	IPR020796: Origin recognition complex, subunit 5; IPR027417: P-loop containing nucleoside triphosphate hydrolase; IPR041664: Orc1-like, AAA ATPase domain	K02607: ORC5;origin recognition complex subunit 5
Npp.01A008300.1	uncharacterized protein LOC8086210; hypothetical protein ZEAMMB73_Zm00001d013239	Protein ENHANCED DISEASE RESISTANCE 2	Protein ENHANCED DISEASE RESISTANCE 2	-	-	IPR009769: Protein ENHANCED DISEASE RESISTANCE 2, C-terminal	-
Npp.01A008310.1	uncharacterized protein LOC110430089	-	-	-	GO:0032955: regulation of division septum assembly; GO:0051301: cell division	IPR005527: Cell division topological specificity factor MinE; IPR012674: Calycin; IPR022017: Domain of unknown function DUF3598	-
Npp.01A008320.1	PREDICTED: eukaryotic translation initiation factor 5A	Eukaryotic translation initiation factor 5A	Eukaryotic translation initiation factor 5A	KOG3271: Translation initiation factor 5A (eIF-5A)	GO:0003746: translation elongation factor activity; GO:0043022: ribosome binding; GO:0045901: positive regulation of translational elongation; GO:0045905: positive regulation of translational termination	IPR001884: Translation elongation factor IF5A-like; IPR008991: Translation protein SH3-like domain superfamily; IPR012340: Nucleic acid-binding, OB-fold; IPR014722: Ribosomal protein L2, domain 2; IPR019769: Translation elongation factor, IF5A, hypusine site; IPR020189: Translation elongation factor, IF5A C-terminal	K03263: EIF5A;translation initiation factor 5A
Npp.01A008330.1	mitotic checkpoint protein BUB3.3 isoform X1	Mitotic checkpoint protein BUB3.3	Mitotic checkpoint protein BUB3.3	KOG1036: Mitotic spindle checkpoint protein BUB3, WD repeat superfamily	GO:0005515: protein binding	IPR001680: WD40 repeat; IPR015943: WD40/YVTN repeat-like-containing domain superfamily; IPR017986: WD40-repeat-containing domain; IPR019775: WD40 repeat, conserved site; IPR036322: WD40-repeat-containing domain superfamily	K02180: BUB3;cell cycle arrest protein BUB3
Npp.01A008340.1	hypothetical protein Zm00014a_021688; uncharacterized protein LOC8086212 isoform X2	-	-	-	-	-	-
Npp.01A008360.1	uncharacterized protein LOC110432002	-	-	-	-	-	-
Npp.01A008370.1	26S proteasome non-ATPase regulatory subunit 10	-	-	-	GO:0005515: protein binding	IPR002110: Ankyrin repeat; IPR020683: Ankyrin repeat-containing domain; IPR036770: Ankyrin repeat-containing domain superfamily	K06694: PSMD10;26S proteasome non-ATPase regulatory subunit 10
Npp.01A008380.1	uncharacterized protein LOC103645210	-	-	-	-	-	-
Npp.01A008390.1	cyclic nucleotide-gated ion channel 2	Cyclic nucleotide-gated ion channel 2	Cyclic nucleotide-gated ion channel 2	-	GO:0005216: ion channel activity; GO:0006811: ion transport; GO:0016020: membrane; GO:0055085: transmembrane transport	IPR000595: Cyclic nucleotide-binding domain; IPR005821: Ion transport domain; IPR014710: RmlC-like jelly roll fold; IPR018490: Cyclic nucleotide-binding-like	K05391: CNGC;cyclic nucleotide gated channel,plant
Npp.01A008400.1	alpha-1,4 glucan phosphorylase L isozyme, chloroplastic/amyloplastic	Alpha-1,4 glucan phosphorylase L isozyme, chloroplastic/amyloplastic; Glycogen phosphorylase, muscle form	Alpha-1,4 glucan phosphorylase L isozyme, chloroplastic/amyloplastic; Glycogen phosphorylase, muscle form	KOG2099: Glycogen phosphorylase	GO:0005975: carbohydrate metabolic process; GO:0008184: glycogen phosphorylase activity	IPR000811: Glycosyl transferase, family 35; IPR035090: Phosphorylase pyridoxal-phosphate attachment site	K00688: PYG,glgP;glycogen phosphorylase [EC:2.4.1.1]
Npp.01A008410.1	UDP-glucose 6-dehydrogenase 5	UDP-glucose 6-dehydrogenase 4	UDP-glucose 6-dehydrogenase 4	KOG2666: UDP-glucose/GDP-mannose dehydrogenase	GO:0003979: UDP-glucose 6-dehydrogenase activity; GO:0051287: NAD binding; GO:0055114: oxidation-reduction process	IPR001732: UDP-glucose/GDP-mannose dehydrogenase, N-terminal; IPR008927: 6-phosphogluconate dehydrogenase-like, C-terminal domain superfamily; IPR014026: UDP-glucose/GDP-mannose dehydrogenase, dimerisation; IPR014027: UDP-glucose/GDP-mannose dehydrogenase, C-terminal; IPR017476: UDP-glucose/GDP-mannose dehydrogenase; IPR028356: UDP-glucose 6-dehydrogenase, eukaryotic type; IPR036220: UDP-glucose/…	K00012: UGDH,ugd;UDPglucose 6-dehydrogenase [EC:1.1.1.22]
Npp.01A008420.1	UDP-glycosyltransferase 83A1	UDP-glycosyltransferase 83A1	UDP-glycosyltransferase 83A1	-	GO:0008194: UDP-glycosyltransferase activity	IPR002213: UDP-glucuronosyl/UDP-glucosyltransferase	-
Npp.01A008430.1	hypothetical protein SORBI_3001G084400; putative glucosyl transferase	-	-	-	-	-	-
Npp.01A008440.1	putative glucosyl transferase; hypothetical protein SORBI_3001G084500	UDP-glycosyltransferase 83A1	UDP-glycosyltransferase 83A1	-	GO:0008194: UDP-glycosyltransferase activity	IPR002213: UDP-glucuronosyl/UDP-glucosyltransferase; IPR035595: UDP-glycosyltransferase family, conserved site	-
Npp.01A008450.1	hypothetical protein SORBI_3001G084700; putative glucosyl transferase	UDP-glycosyltransferase 83A1	UDP-glycosyltransferase 83A1	-	GO:0008194: UDP-glycosyltransferase activity	IPR002213: UDP-glucuronosyl/UDP-glucosyltransferase	-
Npp.01A008450.2	hypothetical protein SETIT_9G086400v2; putative glucosyl transferase	UDP-glycosyltransferase 83A1	UDP-glycosyltransferase 83A1	-	-	-	-
Npp.01A008460.1	protein Asterix	Protein Asterix	Protein Asterix	KOG3462: Predicted membrane protein	-	IPR005351: Uncharacterised protein family UPF0139	-
Npp.01A008470.1	uncharacterized protein LOC8086222 isoform X2; hypothetical protein ZEAMMB73_Zm00001d013247	-	-	-	-	-	-
Npp.01A008480.1	transmembrane protein adipocyte-associated 1 homolog; hypothetical protein	Protein CANDIDATE G-PROTEIN COUPLED RECEPTOR 2	Protein CANDIDATE G-PROTEIN COUPLED RECEPTOR 2	KOG4536: Predicted membrane protein	-	IPR018781: Transmembrane protein TPRA1/CAND2/CAND8	K22988: TPRA1,GPR175;transmembrane protein adipocyte-associated 1
Npp.01A008490.1	PLASMODESMATA CALLOSE-BINDING PROTEIN 3 isoform X1; hypothetical protein SORBI_3001G085200	PLASMODESMATA CALLOSE-BINDING PROTEIN 2; Glucan endo-1,3-beta-glucosidase 2	PLASMODESMATA CALLOSE-BINDING PROTEIN 2; Glucan endo-1,3-beta-glucosidase 2	-	-	IPR012946: X8 domain	-
Npp.01A008500.1	LRR receptor-like serine/threonine-protein kinase RPK2	LRR receptor-like serine/threonine-protein kinase RPK2	LRR receptor-like serine/threonine-protein kinase RPK2	-	GO:0004672: protein kinase activity; GO:0005515: protein binding; GO:0005524: ATP binding; GO:0006468: protein phosphorylation	IPR000719: Protein kinase domain; IPR001611: Leucine-rich repeat; IPR003591: Leucine-rich repeat, typical subtype; IPR008271: Serine/threonine-protein kinase, active site; IPR011009: Protein kinase-like domain superfamily; IPR013210: Leucine-rich repeat-containing N-terminal, plant-type; IPR017441: Protein kinase, ATP binding site; IPR032675: Leucine-rich repeat domain superfamily	-
Npp.01A008510.1	60S ribosomal protein L13a-4	60S ribosomal protein L13a-4	60S ribosomal protein L13a-4	KOG3204: 60S ribosomal protein L13a	GO:0003735: structural constituent of ribosome; GO:0005840: ribosome; GO:0006412: translation; GO:0015934: large ribosomal subunit	IPR005755: Ribosomal protein L13, eukaryotic/archaeal; IPR005822: Ribosomal protein L13; IPR036899: Ribosomal protein L13 superfamily	K02872: RP-L13Ae,RPL13A;large subunit ribosomal protein L13Ae
Npp.01A008520.1	uncharacterized protein LOC112873358	-	-	KOG2027: Spindle pole body protein	-	-	K19476: IST1;vacuolar protein sorting-associated protein IST1
Npp.01A008530.1	uncharacterized protein LOC8086224 isoform X1; Haloacid dehalogenase-like hydrolase (HAD) superfamily protein	-	-	-	-	IPR004274: FCP1 homology domain; IPR023214: HAD superfamily; IPR036412: HAD-like superfamily	-
Npp.01A008540.1	ABC transporter B family member 25	ATP-binding cassette sub-family B member 10, mitochondrial; ABC transporter B family member 25	ATP-binding cassette sub-family B member 10, mitochondrial; ABC transporter B family member 25	KOG0058: Peptide exporter, ABC superfamily	GO:0005524: ATP binding; GO:0016021: integral component of membrane; GO:0042626: ATPase activity, coupled to transmembrane movement of substances; GO:0055085: transmembrane transport	IPR003439: ABC transporter-like; IPR003593: AAA+ ATPase domain; IPR011527: ABC transporter type 1, transmembrane domain; IPR017871: ABC transporter, conserved site; IPR027417: P-loop containing nucleoside triphosphate hydrolase; IPR036640: ABC transporter type 1, transmembrane domain superfamily; IPR039421: Type I protein exporter	-
Npp.01A008550.1	serine/threonine-protein kinase TAO3	Serine/threonine-protein kinase dst1	Serine/threonine-protein kinase dst1	KOG0574: STE20-like serine/threonine kinase MST; KOG0576: Mitogen-activated protein kinase kinase kinase kinase (MAP4K), germinal center kinase family	GO:0004672: protein kinase activity; GO:0005524: ATP binding; GO:0006468: protein phosphorylation	IPR000719: Protein kinase domain; IPR011009: Protein kinase-like domain superfamily; IPR017441: Protein kinase, ATP binding site	-
Npp.01A008560.1	Cleavage stimulation factor subunit 50	Nuclear distribution protein nudF	Nuclear distribution protein nudF	KOG0640: mRNA cleavage stimulating factor complex;subunit 1	GO:0005515: protein binding	IPR001680: WD40 repeat; IPR015943: WD40/YVTN repeat-like-containing domain superfamily; IPR017986: WD40-repeat-containing domain; IPR019775: WD40 repeat, conserved site; IPR036322: WD40-repeat-containing domain superfamily	K14406: CSTF1;cleavage stimulation factor subunit 1
Npp.01A008570.1	-	Mitochondrial substrate carrier family protein J	Mitochondrial substrate carrier family protein J	KOG0751: Mitochondrial aspartate/glutamate carrier protein Aralar/Citrin (contains EF-hand Ca2+-binding domains); KOG0765: Predicted mitochondrial carrier protein	GO:0005347: ATP transmembrane transporter activity; GO:0055085: transmembrane transport	IPR002067: Mitochondrial carrier protein; IPR018108: Mitochondrial substrate/solute carrier; IPR023395: Mitochondrial carrier domain superfamily	K15121: SLC25A44;solute carrier family 25,member 44
Npp.01A008580.1	hypothetical protein LOC_Os11g08730	-	-	-	-	IPR004312: Arabidopsis retrotransposon Orf1	-
Npp.01A008590.1	protein MAIN-LIKE 1	-	-	-	-	IPR019557: Aminotransferase-like, plant mobile domain	-
Npp.01A008600.1	COBRA-like protein 3	COBRA-like protein 3	COBRA-like protein 3	-	GO:0010215: cellulose microfibril organization; GO:0031225: anchored component of membrane	IPR006918: COBRA, plant	-
Npp.01A008610.1	COBRA-like protein 3	COBRA-like protein 3	COBRA-like protein 3	-	GO:0010215: cellulose microfibril organization; GO:0031225: anchored component of membrane	IPR006918: COBRA, plant	-
Npp.01A008620.1	cytochrome b5	Cytochrome b5 isoform A	Cytochrome b5 isoform A	KOG0537: Cytochrome b5	GO:0020037: heme binding	IPR001199: Cytochrome b5-like heme/steroid binding domain; IPR018506: Cytochrome b5, heme-binding site; IPR036400: Cytochrome b5-like heme/steroid binding domain superfamily	K23490: CYB5;cytochrome b5
Npp.01A008640.1	uncharacterized protein LOC103644017; hypothetical protein SHCRBa_019_K12_R_90	-	-	-	-	IPR036869: Chaperone J-domain superfamily	-
Npp.01A008650.1	uncharacterized protein LOC8054242 isoform X1	-	-	-	-	-	-
Npp.01A008660.1	senescence-specific cysteine protease SAG39	Senescence-specific cysteine protease SAG39	Senescence-specific cysteine protease SAG39	-	GO:0006508: proteolysis; GO:0008234: cysteine-type peptidase activity	IPR000169: Cysteine peptidase, cysteine active site; IPR000668: Peptidase C1A, papain C-terminal; IPR013201: Cathepsin propeptide inhibitor domain (I29); IPR025660: Cysteine peptidase, histidine active site; IPR025661: Cysteine peptidase, asparagine active site; IPR038765: Papain-like cysteine peptidase superfamily; IPR039417: Papain-like cysteine endopeptidase	-
Npp.01A008670.1	putative calcium-activated outward-rectifying potassium channel 5, chloroplastic KCO1	Two pore potassium channel a	Two pore potassium channel a	-	GO:0005887: integral component of plasma membrane; GO:0009705: plant-type vacuole membrane; GO:0022841: potassium ion leak channel activity; GO:0030007: cellular potassium ion homeostasis; GO:0071805: potassium ion transmembrane transport	IPR003280: Two pore domain potassium channel; IPR013099: Potassium channel domain; IPR018247: EF-Hand 1, calcium-binding site; IPR031144: Two pore domain potassium channel, plant	K05389: KCNKF;potassium channel subfamily K,other eukaryote
Npp.01A008680.1	initiator of meiotic double stranded breaks SPO11-1	Meiotic recombination protein SPO11-1	Meiotic recombination protein SPO11-1	KOG2795: Catalytic subunit of the meiotic double strand break transesterase	GO:0000737: DNA catabolic process, endonucleolytic; GO:0003677: DNA binding; GO:0005524: ATP binding; GO:0005694: chromosome; GO:0016889: endodeoxyribonuclease activity, producing 3'-phosphomonoesters	IPR002815: Spo11/DNA topoisomerase VI subunit A; IPR013049: Spo11/DNA topoisomerase VI, subunit A, N-terminal; IPR036078: Spo11/DNA topoisomerase VI subunit A superfamily	K10878: SPO11;meiotic recombination protein SPO11
Npp.01A008690.1	Two pore potassium channel a	Two pore potassium channel a	Two pore potassium channel a	-	GO:0005887: integral component of plasma membrane; GO:0009705: plant-type vacuole membrane; GO:0022841: potassium ion leak channel activity; GO:0030007: cellular potassium ion homeostasis; GO:0071805: potassium ion transmembrane transport	IPR013099: Potassium channel domain; IPR031144: Two pore domain potassium channel, plant	-
Npp.01A008700.1	phytochrome C	Phytochrome C	Phytochrome C	-	GO:0000155: phosphorelay sensor kinase activity; GO:0006355: regulation of transcription, DNA-templated; GO:0009584: detection of visible light; GO:0009585: red, far-red light phototransduction; GO:0009881: photoreceptor activity; GO:0017006: protein-tetrapyrrole linkage; GO:0018298: protein-chromophore linkage; GO:0042803: protein homodimerization activity	IPR000014: PAS domain; IPR001294: Phytochrome; IPR003018: GAF domain; IPR003594: Histidine kinase/HSP90-like ATPase; IPR003661: Signal transduction histidine kinase, dimerisation/phosphoacceptor domain; IPR005467: Histidine kinase domain; IPR012129: Phytochrome A/B/C/D/E; IPR013515: Phytochrome, central region; IPR013654: PAS fold-2; IPR013767: PAS fold; IPR016132: Phytochrome chromophore attachm…	-
Npp.01A008710.1	hypothetical protein Sh173M11_g0250; protein PYRICULARIA ORYZAE RESISTANCE 21	Protein PYRICULARIA ORYZAE RESISTANCE 21	Protein PYRICULARIA ORYZAE RESISTANCE 21	-	GO:0030001: metal ion transport; GO:0046872: metal ion binding	IPR036163: Heavy metal-associated domain superfamily	-
Npp.01A008730.1	polycomb group protein EMBRYONIC FLOWER 2 isoform X1	Polycomb group protein EMF2B	Polycomb group protein EMF2B	KOG2350: Zn-finger protein joined to JAZF1 (predicted suppressor)	-	IPR019135: Polycomb protein, VEFS-Box	-
Npp.01A008740.1	Oligopeptide transporter 2	Oligopeptide transporter 3	Oligopeptide transporter 3	KOG2262: Sexual differentiation process protein ISP4	GO:0055085: transmembrane transport	IPR004648: Tetrapeptide transporter, OPT1/isp4; IPR004813: Oligopeptide transporter, OPT superfamily	-
Npp.01A008750.1	protein TORNADO 1; hypothetical protein Sh173M11_g0450	-	-	-	GO:0005515: protein binding	IPR001611: Leucine-rich repeat; IPR027417: P-loop containing nucleoside triphosphate hydrolase; IPR032171: C-terminal of Roc (COR) domain; IPR032675: Leucine-rich repeat domain superfamily	-
Npp.01A008760.1	transmembrane protein 256 homolog; hypothetical protein SORBI_3001G087900	Transmembrane protein 256 homolog	Transmembrane protein 256 homolog	KOG3472: Predicted small membrane protein	-	IPR006696: Protein of unknown function DUF423	-
Npp.01A008770.1	uncharacterized protein LOC110431719	-	-	-	-	-	-
Npp.01A008780.1	Transcriptional adapter ADA2	Transcriptional adapter ADA2	Transcriptional adapter ADA2	KOG0457: Histone acetyltransferase complex SAGA/ADA, subunit ADA2	GO:0003713: transcription coactivator activity; GO:0005515: protein binding; GO:0006357: regulation of transcription by RNA polymerase II; GO:0008270: zinc ion binding; GO:0035065: regulation of histone acetylation	IPR000433: Zinc finger, ZZ-type; IPR001005: SANT/Myb domain; IPR007526: SWIRM domain; IPR009057: Homeobox-like domain superfamily; IPR017884: SANT domain; IPR034318: Transcriptional adapter ADA2, plants; IPR041983: ADA2-like, zinc finger, ZZ-type; IPR043145: Zinc finger, ZZ-type superfamily	K11314: TADA2A,ADA2;transcriptional adapter 2-alpha
Npp.01A008790.1	protein STRICTOSIDINE SYNTHASE-LIKE 3	Protein STRICTOSIDINE SYNTHASE-LIKE 3; Adipocyte plasma membrane-associated protein	Protein STRICTOSIDINE SYNTHASE-LIKE 3; Adipocyte plasma membrane-associated protein	KOG1520: Predicted alkaloid synthase/Surface mucin Hemomucin	GO:0009058: biosynthetic process; GO:0016844: strictosidine synthase activity	IPR011042: Six-bladed beta-propeller, TolB-like; IPR018119: Strictosidine synthase, conserved region	-
Npp.01A008810.1	kinesin-like protein KIN-12G	Kinesin-like protein KIN-12G	Kinesin-like protein KIN-12G	-	GO:0003777: microtubule motor activity; GO:0005524: ATP binding; GO:0007018: microtubule-based movement; GO:0008017: microtubule binding	IPR001752: Kinesin motor domain; IPR027417: P-loop containing nucleoside triphosphate hydrolase; IPR036961: Kinesin motor domain superfamily	K10400: KIF15;kinesin family member 15
Npp.01A008820.1	Tetratricopeptide repeat (TPR)-like superfamily protein; hypothetical protein SORBI_3001G088500	-	-	-	GO:0005515: protein binding	IPR011990: Tetratricopeptide-like helical domain superfamily	-
Npp.01A008830.1	ethylene-responsive protein isoform X2	-	-	-	-	IPR006016: UspA; IPR014729: Rossmann-like alpha/beta/alpha sandwich fold	-
Npp.01A008840.1	protein DCL homolog, chloroplastic	Protein DCL homolog, chloroplastic	Protein DCL homolog, chloroplastic	-	-	-	-
Npp.01A008850.1	LOW QUALITY PROTEIN: EEF1A lysine methyltransferase 1	EEF1A lysine methyltransferase 1	EEF1A lysine methyltransferase 1	KOG3350: Uncharacterized conserved protein	GO:0003676: nucleic acid binding; GO:0016279: protein-lysine N-methyltransferase activity; GO:0032259: methylation	IPR002052: DNA methylase, N-6 adenine-specific, conserved site; IPR019369: Protein-lysine N-methyltransferase Efm5/EEF1AKMT1; IPR041370: Methyltransferase EEF1AKMT1/ZCCHC4	K22855: EEF1AKMT1,EFM5;EEF1A lysine methyltransferase 1 [EC:2.1.1.-]
Npp.01A008860.1	serine/threonine-protein kinase TOUSLED isoform X2	Serine/threonine-protein kinase TOUSLED	Serine/threonine-protein kinase TOUSLED	KOG1151: Tousled-like protein kinase	GO:0004672: protein kinase activity; GO:0005524: ATP binding; GO:0006468: protein phosphorylation	IPR000719: Protein kinase domain; IPR008271: Serine/threonine-protein kinase, active site; IPR011009: Protein kinase-like domain superfamily; IPR017441: Protein kinase, ATP binding site	K08864: TLK;tousled-like kinase [EC:2.7.11.1]
Npp.01A008870.1	uncharacterized protein LOC110431790 isoform X1	Beta-glucosidase BoGH3B	Beta-glucosidase BoGH3B	-	GO:0004553: hydrolase activity, hydrolyzing O-glycosyl compounds; GO:0005975: carbohydrate metabolic process	IPR001764: Glycoside hydrolase, family 3, N-terminal; IPR002772: Glycoside hydrolase family 3 C-terminal domain; IPR017853: Glycoside hydrolase superfamily; IPR036881: Glycoside hydrolase family 3 C-terminal domain superfamily; IPR036962: Glycoside hydrolase, family 3, N-terminal domain superfamily	K05349: bglX;beta-glucosidase [EC:3.2.1.21]
Npp.01A008880.1	uncharacterized protein LOC110437359	Beta-glucosidase BoGH3B	Beta-glucosidase BoGH3B	-	GO:0004553: hydrolase activity, hydrolyzing O-glycosyl compounds; GO:0005975: carbohydrate metabolic process	IPR001764: Glycoside hydrolase, family 3, N-terminal; IPR002772: Glycoside hydrolase family 3 C-terminal domain; IPR017853: Glycoside hydrolase superfamily; IPR036881: Glycoside hydrolase family 3 C-terminal domain superfamily; IPR036962: Glycoside hydrolase, family 3, N-terminal domain superfamily	K05349: bglX;beta-glucosidase [EC:3.2.1.21]
Npp.01A008890.1	uncharacterized protein LOC8085936	Beta-glucosidase BoGH3B; Putative beta-xylosidase	Beta-glucosidase BoGH3B; Putative beta-xylosidase	-	GO:0004553: hydrolase activity, hydrolyzing O-glycosyl compounds; GO:0005975: carbohydrate metabolic process	IPR001764: Glycoside hydrolase, family 3, N-terminal; IPR002772: Glycoside hydrolase family 3 C-terminal domain; IPR017853: Glycoside hydrolase superfamily; IPR036881: Glycoside hydrolase family 3 C-terminal domain superfamily; IPR036962: Glycoside hydrolase, family 3, N-terminal domain superfamily	K05349: bglX;beta-glucosidase [EC:3.2.1.21]
Npp.01A008900.1	putative ammonium transporter 4 member 1	Ammonium transporter 3 member 1	Ammonium transporter 3 member 1	KOG0682: Ammonia permease	GO:0005887: integral component of plasma membrane; GO:0008519: ammonium transmembrane transporter activity; GO:0016020: membrane; GO:0072488: ammonium transmembrane transport	IPR001905: Ammonium transporter; IPR002229: Blood group Rhesus C/E/D polypeptide; IPR018047: Ammonium transporter, conserved site; IPR024041: Ammonium transporter AmtB-like domain; IPR029020: Ammonium/urea transporter	K03320: amt,AMT,MEP;ammonium transporter,Amt family
Npp.01A008910.1	binding partner of ACD11 1	-	-	-	GO:0003676: nucleic acid binding	IPR000504: RNA recognition motif domain; IPR012677: Nucleotide-binding alpha-beta plait domain superfamily; IPR035979: RNA-binding domain superfamily	-
Npp.01A008920.1	DExH-box ATP-dependent RNA helicase DExH3; DEA(D/H)-box RNA helicase family protein	DExH-box ATP-dependent RNA helicase DExH3	DExH-box ATP-dependent RNA helicase DExH3	KOG0920: ATP-dependent RNA helicase A	GO:0003676: nucleic acid binding; GO:0004386: helicase activity; GO:0005524: ATP binding	IPR001650: Helicase, C-terminal; IPR007502: Helicase-associated domain; IPR011545: DEAD/DEAH box helicase domain; IPR011709: Domain of unknown function DUF1605; IPR014001: Helicase superfamily 1/2, ATP-binding domain; IPR014720: Double-stranded RNA-binding domain; IPR027417: P-loop containing nucleoside triphosphate hydrolase	K14442: DHX36,RHAU;ATP-dependent RNA helicase DHX36 [EC:3.6.4.13]
Npp.01A008930.1	protein NAR1	Cytosolic Fe-S cluster assembly factor narfl	Cytosolic Fe-S cluster assembly factor narfl	KOG2439: Nuclear architecture related protein	-	IPR003149: Iron hydrogenase, small subunit; IPR004108: Iron hydrogenase, large subunit, C-terminal; IPR009016: Iron hydrogenase	-
Npp.01A008940.1	putative ammonium transporter 4 member 1	Ammonium transporter 3 member 1; Ammonia channel	Ammonium transporter 3 member 1; Ammonia channel	KOG0682: Ammonia permease	GO:0005887: integral component of plasma membrane; GO:0008519: ammonium transmembrane transporter activity; GO:0016020: membrane; GO:0072488: ammonium transmembrane transport	IPR002229: Blood group Rhesus C/E/D polypeptide; IPR018047: Ammonium transporter, conserved site; IPR024041: Ammonium transporter AmtB-like domain; IPR029020: Ammonium/urea transporter	-
Npp.01A008950.1	hypothetical protein	-	-	-	GO:0005515: protein binding	IPR001810: F-box domain; IPR015915: Kelch-type beta propeller; IPR036047: F-box-like domain superfamily	-
Npp.01A008970.1	uncharacterized protein LOC100276954; hypothetical protein SORBI_3001G090000	-	-	-	-	-	-
Npp.01A008980.1	SRSF protein kinase 1	Serine/threonine-protein kinase SRPK	Serine/threonine-protein kinase SRPK	KOG1290: Serine/threonine protein kinase	GO:0004672: protein kinase activity; GO:0005524: ATP binding; GO:0006468: protein phosphorylation	IPR000719: Protein kinase domain; IPR008271: Serine/threonine-protein kinase, active site; IPR011009: Protein kinase-like domain superfamily; IPR017441: Protein kinase, ATP binding site	K08832: SRPK3,STK23;serine/threonine-protein kinase SRPK3 [EC:2.7.11.1]
Npp.01A008990.1	uncharacterized protein LOC8057372 isoform X3	-	-	-	GO:0005515: protein binding	IPR001680: WD40 repeat; IPR015943: WD40/YVTN repeat-like-containing domain superfamily; IPR024764: Transcription factor IIIC, putative zinc-finger; IPR036322: WD40-repeat-containing domain superfamily	-
Npp.01A009010.1	protein NDH-DEPENDENT CYCLIC ELECTRON FLOW 5 isoform X2	-	-	-	GO:0003824: catalytic activity; GO:0005975: carbohydrate metabolic process; GO:0030246: carbohydrate binding	IPR011013: Galactose mutarotase-like domain superfamily; IPR014718: Glycoside hydrolase-type carbohydrate-binding	-
Npp.01A009020.1	probable helicase MAGATAMA 3	Regulator of nonsense transcripts 1 homolog	Regulator of nonsense transcripts 1 homolog	KOG1801: tRNA-splicing endonuclease positive effector (SEN1); KOG1802: RNA helicase nonsense mRNA reducing factor (pNORF1)	-	IPR027417: P-loop containing nucleoside triphosphate hydrolase; IPR041677: DNA2/NAM7 helicase, AAA domain; IPR041679: DNA2/NAM7 helicase-like, AAA domain	K10706: SETX,ALS4;senataxin [EC:3.6.4.-]
Npp.01A009030.1	uncharacterized protein LOC110437622	Copia protein; Uncharacterized mitochondrial protein AtMg00810	Copia protein; Uncharacterized mitochondrial protein AtMg00810	-	-	IPR043502: DNA/RNA polymerase superfamily	-
Npp.01A009040.1	probable helicase MAGATAMA 3	-	-	-	-	-	K10706: SETX,ALS4;senataxin [EC:3.6.4.-]
Npp.01A009050.1	PHD finger protein ING2	Inhibitor of growth protein 5	Inhibitor of growth protein 5	KOG1973: Chromatin remodeling protein, contains PHD Zn-finger	-	IPR001965: Zinc finger, PHD-type; IPR011011: Zinc finger, FYVE/PHD-type; IPR013083: Zinc finger, RING/FYVE/PHD-type; IPR019787: Zinc finger, PHD-finger; IPR024610: Inhibitor of growth protein, N-terminal histone-binding; IPR028651: ING family	K11346: ING4;inhibitor of growth protein 4
Npp.01A009060.1	YTH domain-containing family protein 2 isoform X1	YTH domain-containing protein ECT2	YTH domain-containing protein ECT2	KOG1901: Uncharacterized high-glucose-regulated protein; KOG1902: Putative signal transduction protein involved in RNA splicing	GO:0003723: RNA binding	IPR007275: YTH domain	K20102: YTHDF;YTH domain-containing family protein
Npp.01A009070.1	myosin-12 isoform X2	Myosin-12	Myosin-12	-	GO:0003774: motor activity; GO:0005515: protein binding; GO:0005524: ATP binding; GO:0007015: actin filament organization; GO:0016459: myosin complex	IPR000048: IQ motif, EF-hand binding site; IPR001609: Myosin head, motor domain; IPR002710: Dilute domain; IPR004009: Myosin, N-terminal, SH3-like; IPR027417: P-loop containing nucleoside triphosphate hydrolase; IPR036018: Plant myosin, class XI, motor domain; IPR036961: Kinesin motor domain superfamily; IPR037975: Class XI myosin, cargo binding domain	K10357: MYO5;myosin V
Npp.01A009090.1	photosystem II D1 precursor processing protein PSB27-H2, chloroplastic isoform X2	-	-	-	GO:0010207: photosystem II assembly	IPR025585: Photosystem II Pbs27; IPR038450: Photosystem II Pbs27 superfamily	-
Npp.01A009100.1	Acyl-CoA N-acyltransferase with RING/FYVE/PHD-type zinc finger protein	-	-	-	GO:0003714: transcription corepressor activity; GO:0045892: negative regulation of transcription, DNA-templated	IPR001965: Zinc finger, PHD-type; IPR011011: Zinc finger, FYVE/PHD-type; IPR013083: Zinc finger, RING/FYVE/PHD-type; IPR019786: Zinc finger, PHD-type, conserved site; IPR019787: Zinc finger, PHD-finger; IPR032308: Jas TPL-binding domain; IPR042163: PHD finger protein 12	-
Npp.01A009110.1	serine hydroxymethyltransferase, mitochondrial	Serine hydroxymethyltransferase, mitochondrial	Serine hydroxymethyltransferase, mitochondrial	KOG2467: Glycine/serine hydroxymethyltransferase	GO:0004372: glycine hydroxymethyltransferase activity; GO:0019264: glycine biosynthetic process from serine; GO:0030170: pyridoxal phosphate binding; GO:0035999: tetrahydrofolate interconversion	IPR001085: Serine hydroxymethyltransferase; IPR015421: Pyridoxal phosphate-dependent transferase, major domain; IPR015422: Pyridoxal phosphate-dependent transferase domain 1; IPR015424: Pyridoxal phosphate-dependent transferase; IPR019798: Serine hydroxymethyltransferase, pyridoxal phosphate binding site; IPR039429: Serine hydroxymethyltransferase-like domain	K00600: glyA,SHMT;glycine hydroxymethyltransferase [EC:2.1.2.1]
Npp.01A009120.1	protein JINGUBANG	-	-	-	GO:0005515: protein binding	IPR001680: WD40 repeat; IPR015943: WD40/YVTN repeat-like-containing domain superfamily; IPR017986: WD40-repeat-containing domain; IPR020472: G-protein beta WD-40 repeat; IPR036322: WD40-repeat-containing domain superfamily	-
Npp.01A009130.1	BTB/POZ domain-containing protein At5g66560-like	BTB/POZ domain-containing protein At5g66560	BTB/POZ domain-containing protein At5g66560	-	-	IPR011333: SKP1/BTB/POZ domain superfamily; IPR027356: NPH3 domain; IPR043454: NPH3/RPT2-like family	-
Npp.01A009140.1	uncharacterized protein LOC8085968; hypothetical protein BAE44_0009220	-	-	-	-	-	-
Npp.01A009150.1	uncharacterized protein LOC8060499; hypothetical protein GQ55_9G091400	-	-	-	-	IPR004265: Dirigent protein	-
Npp.01A009160.1	deoxyhypusine synthase isoform X2	Deoxyhypusine synthase	Deoxyhypusine synthase	KOG2924: Deoxyhypusine synthase	GO:0008612: peptidyl-lysine modification to peptidyl-hypusine	IPR002773: Deoxyhypusine synthase; IPR029035: DHS-like NAD/FAD-binding domain superfamily; IPR036982: Deoxyhypusine synthase superfamily	K00809: DHPS,dys;deoxyhypusine synthase [EC:2.5.1.46]
Npp.01A009170.1	hypothetical protein SORBI_3001G096200; ribosomal protein S10	Ribosomal protein S10, mitochondrial	Ribosomal protein S10, mitochondrial	-	GO:0003735: structural constituent of ribosome; GO:0005840: ribosome; GO:0006412: translation	IPR001848: Ribosomal protein S10; IPR027486: Ribosomal protein S10 domain; IPR036838: Ribosomal protein S10 domain superfamily	K02946: RP-S10,MRPS10,rpsJ;small subunit ribosomal protein S10
Npp.01A009180.1	CWF19-like protein 2	CWF19-like protein 2	CWF19-like protein 2	KOG2476: Uncharacterized conserved protein; KOG2477: Uncharacterized conserved protein	-	IPR006767: Cwf19-like protein, C-terminal domain-2; IPR006768: Cwf19-like, C-terminal domain-1; IPR036265: HIT-like superfamily; IPR040194: Cwf19-like protein	-
Npp.01A009190.1	DNA repair protein XRCC4	DNA repair protein XRCC4	DNA repair protein XRCC4	-	GO:0003677: DNA binding; GO:0005634: nucleus; GO:0006302: double-strand break repair; GO:0006310: DNA recombination	IPR010585: DNA repair protein XRCC4	K10886: XRCC4;DNA-repair protein XRCC4
Npp.01A009200.1	telomerase Cajal body protein 1; hypothetical protein C2845_PM01G28830	Telomerase Cajal body protein 1	Telomerase Cajal body protein 1	KOG2919: Guanine nucleotide-binding protein	GO:0005515: protein binding	IPR001680: WD40 repeat; IPR015943: WD40/YVTN repeat-like-containing domain superfamily; IPR017986: WD40-repeat-containing domain; IPR036322: WD40-repeat-containing domain superfamily	K23314: WRAP53,TCAB1;telomerase Cajal body protein 1
Npp.01A009210.1	uncharacterized protein LOC112877901; hypothetical protein GQ55_9G092500	-	-	-	-	-	-
Npp.01A009220.1	alcohol dehydrogenase	Alcohol dehydrogenase 1	Alcohol dehydrogenase 1	KOG0022: Alcohol dehydrogenase, class III	GO:0008270: zinc ion binding; GO:0016491: oxidoreductase activity; GO:0055114: oxidation-reduction process	IPR002328: Alcohol dehydrogenase, zinc-type, conserved site; IPR011032: GroES-like superfamily; IPR013149: Alcohol dehydrogenase, C-terminal; IPR013154: Alcohol dehydrogenase, N-terminal; IPR036291: NAD(P)-binding domain superfamily	K18857: ADH1;alcohol dehydrogenase class-P [EC:1.1.1.1]
Npp.01A009230.1	Conserved hypothetical protein 4/5	-	-	-	-	IPR014812: Vacuolar protein sorting-associated protein 51	K20296: ANG2,VPS51;vacuolar protein sorting-associated protein 51
Npp.01A009240.1	inositol 3-kinase	Inositol 3-kinase	Inositol 3-kinase	-	GO:0005524: ATP binding; GO:0010264: myo-inositol hexakisphosphate biosynthetic process; GO:0019140: inositol 3-kinase activity	IPR002173: Carbohydrate/purine kinase, PfkB, conserved site; IPR011611: Carbohydrate kinase PfkB; IPR029056: Ribokinase-like; IPR031094: Inositol 3-kinase	K19517: MIK;1D-myo-inositol 3-kinase [EC:2.7.1.64]
Npp.01A009250.1	Cyclin-H1-1	Cyclin-H1-1	Cyclin-H1-1	KOG0794: CDK8 kinase-activating protein cyclin C; KOG2496: Cdk activating kinase (CAK)/RNA polymerase II transcription initiation/nucleotide excision repair factor TFIIH/TFIIK, cyclin H subunit	GO:0006357: regulation of transcription by RNA polymerase II; GO:0016538: cyclin-dependent protein serine/threonine kinase regulator activity; GO:0042025: host cell nucleus	IPR006671: Cyclin, N-terminal; IPR013763: Cyclin-like; IPR031658: Cyclin, C-terminal domain 2; IPR036915: Cyclin-like superfamily; IPR043198: Cyclin/Cyclin-like subunit Ssn8	K06634: CCNH;cyclin H
Npp.01A009260.1	uncharacterized protein LOC110432728	-	-	-	-	IPR023214: HAD superfamily; IPR036412: HAD-like superfamily; IPR043502: DNA/RNA polymerase superfamily	K17619: MDP1;magnesium-dependent phosphatase 1 [EC:3.1.3.48 3.1.3.-]
Npp.01A009270.1	Magnesium-dependent phosphatase 1	Magnesium-dependent phosphatase 1	Magnesium-dependent phosphatase 1	KOG4549: Magnesium-dependent phosphatase	GO:0016791: phosphatase activity	IPR010036: Magnesium-dependent phosphatase-1, eukaryotic/archaeal-type; IPR023214: HAD superfamily; IPR036412: HAD-like superfamily	K17619: MDP1;magnesium-dependent phosphatase 1 [EC:3.1.3.48 3.1.3.-]
Npp.01A009280.1	E3 ubiquitin-protein ligase HOS1	-	-	-	-	IPR000644: CBS domain; IPR013083: Zinc finger, RING/FYVE/PHD-type; IPR025151: ELYS-like domain	-
Npp.01A009290.1	Conserved hypothetical protein 12; uncharacterized protein LOC8085974	-	-	-	-	-	-
Npp.01A009300.1	GEM-like protein 1	GEM-like protein 1	GEM-like protein 1	-	-	IPR004182: GRAM domain; IPR011993: PH-like domain superfamily; IPR037848: GEM-like protein	-
Npp.01A009310.1	ATP synthase	ATP synthase subunit delta, chloroplastic	ATP synthase subunit delta, chloroplastic	-	GO:0015986: ATP synthesis coupled proton transport; GO:0046933: proton-transporting ATP synthase activity, rotational mechanism	IPR000711: ATPase, OSCP/delta subunit	-
Npp.01A009320.1	Oryza sativa protein similar to cytokinesis-specific syntaxin-related protein AAP03411	Syntaxin-related protein KNOLLE	Syntaxin-related protein KNOLLE	KOG0810: SNARE protein Syntaxin 1 and related proteins	GO:0005484: SNAP receptor activity; GO:0006886: intracellular protein transport; GO:0016020: membrane; GO:0016192: vesicle-mediated transport	IPR000727: Target SNARE coiled-coil homology domain; IPR006011: Syntaxin, N-terminal domain; IPR006012: Syntaxin/epimorphin, conserved site; IPR010989: SNARE	K08486: STX1B_2_3;syntaxin 1B/2/3
Npp.01A009330.1	uncharacterized protein LOC8060510; Conserved hypothetical protein 16	Putative rRNA methyltransferase YlbH	Putative rRNA methyltransferase YlbH	-	-	IPR029063: S-adenosyl-L-methionine-dependent methyltransferase	-
Npp.01A009340.1	Endoglucanase 10	Endoglucanase 10	Endoglucanase 10	-	GO:0004553: hydrolase activity, hydrolyzing O-glycosyl compounds; GO:0005975: carbohydrate metabolic process	IPR001701: Glycoside hydrolase family 9; IPR008928: Six-hairpin glycosidase superfamily; IPR012341: Six-hairpin glycosidase-like superfamily; IPR018221: Glycoside hydrolase family 9, His active site; IPR033126: Glycosyl hydrolases family 9, Asp/Glu active sites	K01179: E3.2.1.4;endoglucanase [EC:3.2.1.4]
Npp.01A009350.1	pentatricopeptide repeat-containing protein At1g77405	-	-	-	GO:0005515: protein binding	IPR002885: Pentatricopeptide repeat; IPR011990: Tetratricopeptide-like helical domain superfamily	-
Npp.01A009360.1	glycerol-3-phosphate 2-O-acyltransferase 6	Glycerol-3-phosphate acyltransferase RAM2	Glycerol-3-phosphate acyltransferase RAM2	-	GO:0016746: transferase activity, transferring acyl groups	IPR002123: Phospholipid/glycerol acyltransferase; IPR023214: HAD superfamily; IPR036412: HAD-like superfamily	-
Npp.01A009370.1	retrotransposon protein	-	-	-	GO:0003676: nucleic acid binding	IPR016197: Chromo-like domain superfamily; IPR036397: Ribonuclease H superfamily	-
Npp.01A009380.1	protein NRT1/ PTR FAMILY 2.12	Protein NRT1/ PTR FAMILY 2.13	Protein NRT1/ PTR FAMILY 2.13	-	GO:0016020: membrane; GO:0022857: transmembrane transporter activity; GO:0055085: transmembrane transport	IPR000109: Proton-dependent oligopeptide transporter family; IPR036259: MFS transporter superfamily	-
Npp.01A009390.1	ankyrin-2; hypothetical protein SHCRBa_119_J13_F_10	-	-	-	GO:0005515: protein binding	IPR002110: Ankyrin repeat; IPR020683: Ankyrin repeat-containing domain; IPR026961: PGG domain; IPR036770: Ankyrin repeat-containing domain superfamily	-
Npp.01A009400.1	ankyrin-2; hypothetical protein SHCRBa_119_J13_F_20	NF-kappa-B inhibitor beta	NF-kappa-B inhibitor beta	-	GO:0005515: protein binding	IPR002110: Ankyrin repeat; IPR020683: Ankyrin repeat-containing domain; IPR026961: PGG domain; IPR036770: Ankyrin repeat-containing domain superfamily	-
Npp.01A009410.1	beta-fructofuranosidase; hypothetical protein SORBI_3001G099700	Beta-fructofuranosidase, insoluble isoenzyme 3	Beta-fructofuranosidase, insoluble isoenzyme 3	KOG0228: Beta-fructofuranosidase (invertase)	GO:0004553: hydrolase activity, hydrolyzing O-glycosyl compounds; GO:0005975: carbohydrate metabolic process	IPR001362: Glycoside hydrolase, family 32; IPR013148: Glycosyl hydrolase family 32, N-terminal; IPR013189: Glycosyl hydrolase family 32, C-terminal; IPR013320: Concanavalin A-like lectin/glucanase domain superfamily; IPR018053: Glycoside hydrolase, family 32, active site; IPR023296: Glycosyl hydrolase, five-bladed beta-propellor domain superfamily	K01193: INV,sacA;beta-fructofuranosidase [EC:3.2.1.26]
Npp.01A009420.1	hypothetical protein SHCRBa_119_J13_F_480	Ribonuclease P protein subunit p25-like protein	Ribonuclease P protein subunit p25-like protein	KOG2567: Uncharacterized conserved protein	GO:0003676: nucleic acid binding	IPR002775: DNA/RNA-binding protein Alba-like; IPR036882: Alba-like domain superfamily	-
Npp.01A009430.1	U3 small nucleolar RNA-associated protein 4	U3 small nucleolar RNA-associated protein 4 homolog	U3 small nucleolar RNA-associated protein 4 homolog	KOG2048: WD40 repeat protein	GO:0005515: protein binding	IPR001680: WD40 repeat; IPR011047: Quinoprotein alcohol dehydrogenase-like superfamily; IPR015943: WD40/YVTN repeat-like-containing domain superfamily; IPR017986: WD40-repeat-containing domain; IPR036322: WD40-repeat-containing domain superfamily	K14548: UTP4,CIRH1A;U3 small nucleolar RNA-associated protein 4
Npp.01A009440.1	glucose-1-phosphate adenylyltransferase; plastid ADP-glucose pyrophosphorylase large subunit	Glucose-1-phosphate adenylyltransferase large subunit 1, chloroplastic/amyloplastic	Glucose-1-phosphate adenylyltransferase large subunit 1, chloroplastic/amyloplastic	-	GO:0005978: glycogen biosynthetic process; GO:0008878: glucose-1-phosphate adenylyltransferase activity	IPR005835: Nucleotidyl transferase domain; IPR005836: ADP-glucose pyrophosphorylase, conserved site; IPR011004: Trimeric LpxA-like superfamily; IPR011831: Glucose-1-phosphate adenylyltransferase; IPR029044: Nucleotide-diphospho-sugar transferases	K00975: glgC;glucose-1-phosphate adenylyltransferase [EC:2.7.7.27]
Npp.01A009450.1	GATA transcription factor	GATA transcription factor 19	GATA transcription factor 19	-	GO:0005515: protein binding; GO:0006355: regulation of transcription, DNA-templated; GO:0008270: zinc ion binding; GO:0043565: sequence-specific DNA binding	IPR000679: Zinc finger, GATA-type; IPR010399: Tify domain; IPR010402: CCT domain; IPR013088: Zinc finger, NHR/GATA-type	-
Npp.01A009460.1	50S ribosomal protein L12-2; uncharacterized protein LOC8059939	50S ribosomal protein L7/L12	50S ribosomal protein L7/L12	KOG1715: Mitochondrial/chloroplast ribosomal protein L12	GO:0003735: structural constituent of ribosome; GO:0005840: ribosome; GO:0006412: translation	IPR000206: Ribosomal protein L7/L12; IPR008932: Ribosomal protein L7/L12, oligomerisation; IPR013823: Ribosomal protein L7/L12, C-terminal; IPR014719: Ribosomal protein L7/L12, C-terminal/adaptor protein ClpS-like; IPR036235: Ribosomal protein L7/L12, oligomerisation domain superfamily	K02935: RP-L7,MRPL12,rplL;large subunit ribosomal protein L7/L12
Npp.01A009470.1	uncharacterized protein LOC8075287; hypothetical protein C2845_PM08G22310	-	-	-	GO:0003676: nucleic acid binding; GO:0008270: zinc ion binding	IPR001878: Zinc finger, CCHC-type; IPR024752: Myb/SANT-like domain	-
Npp.01A009480.1	Folate transporter 1 chloroplastic; hypothetical protein SHCRBa_073_J10_R_50	Mitochondrial substrate carrier family protein W; Folate transporter 1, chloroplastic	Mitochondrial substrate carrier family protein W; Folate transporter 1, chloroplastic	KOG0764: Mitochondrial FAD carrier protein	-	IPR018108: Mitochondrial substrate/solute carrier; IPR023395: Mitochondrial carrier domain superfamily	K15115: SLC25A32,MFT;solute carrier family 25 (mitochondrial folate transporter),member 32
Npp.01A009490.1	endoplasmic oxidoreductin-1	ERO1-like protein beta; Endoplasmic reticulum oxidoreductin-1	ERO1-like protein beta; Endoplasmic reticulum oxidoreductin-1	KOG2608: Endoplasmic reticulum membrane-associated oxidoreductin involved in disulfide bond formation	GO:0003756: protein disulfide isomerase activity; GO:0005783: endoplasmic reticulum; GO:0016671: oxidoreductase activity, acting on a sulfur group of donors, disulfide as acceptor; GO:0055114: oxidation-reduction process	IPR007266: Endoplasmic reticulum oxidoreductin 1; IPR037192: ERO1-like superfamily	K10950: ERO1L;ERO1-like protein alpha [EC:1.8.4.-]
Npp.01A009500.1	hypothetical protein C2845_PM13G06880	-	-	-	GO:0003676: nucleic acid binding; GO:0008270: zinc ion binding	IPR001878: Zinc finger, CCHC-type; IPR036875: Zinc finger, CCHC-type superfamily	-
Npp.01A009510.1	GRF1-interacting factor 1	GRF-interacting factor 1	GRF-interacting factor 1	KOG3227: Calcium-responsive transcription coactivator	GO:0003713: transcription coactivator activity	IPR007726: SS18 family	-
Npp.01A009520.1	STS14 protein	STS14 protein	STS14 protein	-	-	IPR001283: Cysteine-rich secretory protein-related; IPR014044: CAP domain; IPR035940: CAP superfamily	-
Npp.01A009530.1	hypothetical protein C2845_PM01G29270; protein MIZU-KUSSEI 1	-	-	-	GO:0010274: hydrotropism	IPR006460: Protein MIZU-KUSSEI 1-like, plant	-
Npp.01A009540.1	ATP-dependent DNA helicase PIF1; uncharacterized protein LOC8071841	-	-	-	GO:0000723: telomere maintenance; GO:0003678: DNA helicase activity; GO:0006281: DNA repair	IPR010285: DNA helicase Pif1-like; IPR027417: P-loop containing nucleoside triphosphate hydrolase	-
Npp.01A009550.1	BEL1-like homeodomain protein 4	BEL1-like homeodomain protein 2	BEL1-like homeodomain protein 2	-	GO:0003677: DNA binding; GO:0006355: regulation of transcription, DNA-templated	IPR001356: Homeobox domain; IPR006563: POX domain; IPR008422: Homeobox KN domain; IPR009057: Homeobox-like domain superfamily	-
Npp.01A009560.1	4-hydroxy-3-methylbut-2-enyl diphosphate reductase, chloroplastic	4-hydroxy-3-methylbut-2-enyl diphosphate reductase, chloroplastic	4-hydroxy-3-methylbut-2-enyl diphosphate reductase, chloroplastic	-	GO:0019288: isopentenyl diphosphate biosynthetic process, methylerythritol 4-phosphate pathway; GO:0046872: metal ion binding; GO:0050992: dimethylallyl diphosphate biosynthetic process; GO:0051745: 4-hydroxy-3-methylbut-2-en-1-yl diphosphate reductase activity	IPR003451: 4-hydroxy-3-methylbut-2-enyl diphosphate reductase	K03527: ispH,lytB;4-hydroxy-3-methylbut-2-en-1-yl diphosphate reductase [EC:1.17.7.4]
Npp.01A009570.1	uncharacterized protein At1g28695; hypothetical protein SETIT_9G105700v2	Uncharacterized protein At1g28695	Uncharacterized protein At1g28695	-	-	IPR005069: Nucleotide-diphospho-sugar transferase	-
Npp.01A009580.1	uncharacterized protein LOC8060533	-	-	-	GO:0006364: rRNA processing; GO:0008168: methyltransferase activity	IPR006700: Ribosomal RNA small subunit methyltransferase E; IPR015947: PUA-like superfamily; IPR029026: tRNA (guanine-N1-)-methyltransferase, N-terminal; IPR029028: Alpha/beta knot methyltransferases	K09761: rsmE;16S rRNA (uracil1498-N3)-methyltransferase [EC:2.1.1.193]
Npp.01A009590.1	ACT domain-containing protein ACR3	ACT domain-containing protein ACR3	ACT domain-containing protein ACR3	-	-	IPR002912: ACT domain; IPR040217: ACT domain-containing protein ACR1-12	-
Npp.01A009600.1	uncharacterized protein LOC8059956	-	-	-	-	IPR005607: BSD domain	-
Npp.01A009610.1	signal peptide peptidase 1-like	Signal peptide peptidase 1	Signal peptide peptidase 1	KOG2442: Uncharacterized conserved protein, contains PA domain; KOG2443: Uncharacterized conserved protein	GO:0004190: aspartic-type endopeptidase activity; GO:0016021: integral component of membrane	IPR006639: Presenilin/signal peptide peptidase; IPR007369: Peptidase A22B, signal peptide peptidase	K09595: HM13;minor histocompatibility antigen H13 [EC:3.4.23.-]
Npp.01A009620.1	uncharacterized protein LOC8059955; hypothetical protein BAE44_0004498	-	-	-	-	IPR016972: Uncharacterised conserved protein UCP031279	-
Npp.01A009630.1	uncharacterized protein LOC8060531; hypothetical protein GQ55_6G111800	-	-	-	GO:0008168: methyltransferase activity	IPR011205: Uncharacterised conserved protein UCP015417, vWA; IPR035996: Tetrapyrrole methylase superfamily	-
Npp.01A009640.1	uncharacterized protein LOC8059954	-	-	-	-	IPR011205: Uncharacterised conserved protein UCP015417, vWA; IPR036465: von Willebrand factor A-like domain superfamily	-
Npp.01A009650.1	peptidyl-prolyl cis-trans isomerase FKBP62-like	Peptidyl-prolyl cis-trans isomerase FKBP65	Peptidyl-prolyl cis-trans isomerase FKBP65	-	GO:0005515: protein binding	IPR011990: Tetratricopeptide-like helical domain superfamily; IPR013026: Tetratricopeptide repeat-containing domain; IPR013105: Tetratricopeptide repeat 2; IPR019734: Tetratricopeptide repeat	-
Npp.01A009660.1	Serine carboxypeptidase-like 18	Serine carboxypeptidase-like 18	Serine carboxypeptidase-like 18	-	GO:0004185: serine-type carboxypeptidase activity; GO:0006508: proteolysis	IPR001563: Peptidase S10, serine carboxypeptidase; IPR029058: Alpha/Beta hydrolase fold	K16296: SCPL-I;serine carboxypeptidase-like clade I [EC:3.4.16.-]
Npp.01A009670.1	serine carboxypeptidase-like 18	Serine carboxypeptidase-like 3	Serine carboxypeptidase-like 3	-	GO:0004185: serine-type carboxypeptidase activity; GO:0006508: proteolysis	IPR001563: Peptidase S10, serine carboxypeptidase; IPR029058: Alpha/Beta hydrolase fold	-
Npp.01A009680.1	ABC transporter F family member 4; FHA domain-containing protein At4g14490	-	-	-	GO:0005515: protein binding	IPR000253: Forkhead-associated (FHA) domain; IPR008984: SMAD/FHA domain superfamily	-
Npp.01A009700.1	Serine carboxypeptidase-like 18	Serine carboxypeptidase-like 3	Serine carboxypeptidase-like 3	-	GO:0004185: serine-type carboxypeptidase activity; GO:0006508: proteolysis	IPR001563: Peptidase S10, serine carboxypeptidase; IPR029058: Alpha/Beta hydrolase fold	K16296: SCPL-I;serine carboxypeptidase-like clade I [EC:3.4.16.-]
Npp.01A009710.1	prostamide/prostaglandin F synthase	Prostamide/prostaglandin F synthase	Prostamide/prostaglandin F synthase	-	GO:0055114: oxidation-reduction process	IPR032801: Peroxiredoxin-like 2A/B/C; IPR036249: Thioredoxin-like superfamily	-
Npp.01A009720.1	thioredoxin-like protein AAED1, chloroplastic	Prostamide/prostaglandin F synthase	Prostamide/prostaglandin F synthase	-	GO:0055114: oxidation-reduction process	IPR032801: Peroxiredoxin-like 2A/B/C; IPR036249: Thioredoxin-like superfamily	-
Npp.01A009730.1	hypothetical protein; uncharacterized protein LOC8059959	-	-	-	-	IPR021414: Protein of unknown function DUF3054	-
Npp.01A009740.1	probable zinc metalloprotease EGY3, chloroplastic	Probable zinc metalloprotease EGY3, chloroplastic	Probable zinc metalloprotease EGY3, chloroplastic	-	-	-	-
Npp.01A009760.1	transcription factor bHLH49 isoform X2	Transcription factor bHLH74	Transcription factor bHLH74	-	GO:0006355: regulation of transcription, DNA-templated; GO:0046983: protein dimerization activity	IPR011598: Myc-type, basic helix-loop-helix (bHLH) domain; IPR024097: Basic helix-loop-helix leucine zipper transcription factor; IPR036638: Helix-loop-helix DNA-binding domain superfamily	-
Npp.01A009770.1	ER membrane protein complex subunit 8/9 homolog; hypothetical protein SORBI_3001G105100	ER membrane protein complex subunit 8/9 homolog	ER membrane protein complex subunit 8/9 homolog	KOG3289: Uncharacterized conserved protein encoded by sequence overlapping the COX4 gene	GO:0072546: ER membrane protein complex	IPR005366: ER membrane protein complex subunit 8/9	K23569: EMC8_9;ER membrane protein complex subunit 8/9
Npp.01A009780.1	DEAD-box ATP-dependent RNA helicase 16; hypothetical protein SORBI_3001G105200	DEAD-box ATP-dependent RNA helicase 16	DEAD-box ATP-dependent RNA helicase 16	KOG0330: ATP-dependent RNA helicase; KOG0346: RNA helicase	GO:0003676: nucleic acid binding; GO:0005524: ATP binding	IPR001650: Helicase, C-terminal; IPR011545: DEAD/DEAH box helicase domain; IPR014001: Helicase superfamily 1/2, ATP-binding domain; IPR014014: RNA helicase, DEAD-box type, Q motif; IPR027417: P-loop containing nucleoside triphosphate hydrolase	K14810: DDX56,DBP9;ATP-dependent RNA helicase DDX56/DBP9 [EC:3.6.4.13]
Npp.01A009790.1	uncharacterized protein LOC8060537 isoform X1	-	-	-	-	-	-
Npp.01A009800.1	pentatricopeptide repeat-containing protein At3g49730; hypothetical protein SORBI_3001G105400	Pentatricopeptide repeat-containing protein At3g49730	Pentatricopeptide repeat-containing protein At3g49730	-	GO:0005515: protein binding	IPR002885: Pentatricopeptide repeat; IPR011990: Tetratricopeptide-like helical domain superfamily	-
Npp.01A009810.1	uncharacterized protein LOC8060538 isoform X1	-	-	-	-	IPR001623: DnaJ domain; IPR036869: Chaperone J-domain superfamily	-
Npp.01A009820.1	uncharacterized protein LOC8060540; hypothetical protein BAE44_0015025	-	-	-	GO:0005515: protein binding	IPR001810: F-box domain; IPR036047: F-box-like domain superfamily	-
Npp.01A009830.1	GTP-binding protein At3g49725, chloroplastic	GTPase HflX	GTPase HflX	KOG0410: Predicted GTP binding protein	GO:0005525: GTP binding	IPR006073: GTP binding domain; IPR016496: GTPase HflX; IPR025121: GTPase HflX, N-terminal; IPR027417: P-loop containing nucleoside triphosphate hydrolase; IPR030394: HflX-type guanine nucleotide-binding (G) domain; IPR032305: GTP-binding protein, middle domain; IPR042108: GTPase HflX, N-terminal domain superfamily	-
Npp.01A009840.1	uncharacterized protein LOC8059966; hypothetical protein Zm00014a_010514	-	-	-	GO:0005515: protein binding	IPR001810: F-box domain; IPR036047: F-box-like domain superfamily	-
Npp.01A009850.1	1-aminocyclopropane-1-carboxylate synthase 1	1-aminocyclopropane-1-carboxylate synthase 1	1-aminocyclopropane-1-carboxylate synthase 1	KOG0256: 1-aminocyclopropane-1-carboxylate synthase, and related proteins	GO:0003824: catalytic activity; GO:0009058: biosynthetic process; GO:0030170: pyridoxal phosphate binding	IPR004838: Aminotransferases, class-I, pyridoxal-phosphate-binding site; IPR004839: Aminotransferase, class I/classII; IPR015421: Pyridoxal phosphate-dependent transferase, major domain; IPR015422: Pyridoxal phosphate-dependent transferase domain 1; IPR015424: Pyridoxal phosphate-dependent transferase	K01762: ACS;1-aminocyclopropane-1-carboxylate synthase [EC:4.4.1.14]
Npp.01A009860.1	probable L-type lectin-domain containing receptor kinase S.5	-	-	-	GO:0030246: carbohydrate binding	IPR001220: Legume lectin domain; IPR013320: Concanavalin A-like lectin/glucanase domain superfamily	-
Npp.01A009870.1	Knotted 1-type homeobox protein 3	Homeobox protein knotted-1-like 7	Homeobox protein knotted-1-like 7	-	GO:0000981: RNA polymerase II transcription factor activity, sequence-specific DNA binding; GO:0003677: DNA binding; GO:0005634: nucleus; GO:0006355: regulation of transcription, DNA-templated	IPR001356: Homeobox domain; IPR005539: ELK domain; IPR005541: KNOX2; IPR008422: Homeobox KN domain; IPR009057: Homeobox-like domain superfamily; IPR017970: Homeobox, conserved site	-
Npp.01A009880.1	uncharacterized protein LOC110433583; hypothetical protein SORBI_3001G106100	-	-	-	-	-	-
Npp.01A009890.1	knotted1-like homeobox protein	Homeotic protein knotted-1	Homeotic protein knotted-1	-	GO:0003677: DNA binding; GO:0005634: nucleus	IPR005540: KNOX1	-
Npp.01A009900.1	knotted1-like homeobox protein	Homeotic protein knotted-1	Homeotic protein knotted-1	KOG3268: Predicted E3 ubiquitin ligase	GO:0000981: RNA polymerase II transcription factor activity, sequence-specific DNA binding; GO:0003677: DNA binding; GO:0005634: nucleus; GO:0006355: regulation of transcription, DNA-templated	IPR001356: Homeobox domain; IPR005539: ELK domain; IPR005541: KNOX2; IPR008422: Homeobox KN domain; IPR009057: Homeobox-like domain superfamily; IPR013083: Zinc finger, RING/FYVE/PHD-type; IPR016135: Ubiquitin-conjugating enzyme/RWD-like; IPR017970: Homeobox, conserved site; IPR026850: FANCL C-terminal domain	-
Npp.01A009910.1	hypothetical protein SORBI_3001G106400; uncharacterized protein LOC8059969	Putative lipase ROG1	Putative lipase ROG1	KOG4372: Predicted alpha/beta hydrolase	-	IPR007751: Domain of unknown function DUF676, lipase-like; IPR029058: Alpha/Beta hydrolase fold	-
Npp.01A009930.1	18S rRNA (guanine-N(7))-methyltransferase	-	-	-	-	-	-
Npp.01A009940.1	sulfite exporter TauE/SafE family protein 4	Sulfite exporter TauE/SafE family protein 4	Sulfite exporter TauE/SafE family protein 4	-	GO:0016021: integral component of membrane	IPR002781: Transmembrane protein TauE-like	-
Npp.01A009950.1	sulfite exporter TauE/SafE family protein 4	Sulfite exporter TauE/SafE family protein 4	Sulfite exporter TauE/SafE family protein 4	-	GO:0016021: integral component of membrane	IPR002781: Transmembrane protein TauE-like	-
Npp.01A009960.1	uncharacterized protein DDB_G0290803; hypothetical protein	-	-	-	-	-	-
Npp.01A009970.1	CSC1-like protein RXW8	CSC1-like protein At1g10090	CSC1-like protein At1g10090	KOG1134: Uncharacterized conserved protein	GO:0016020: membrane	IPR003864: Calcium-dependent channel, 7TM region, putative phosphate; IPR027815: 10TM putative phosphate transporter, cytosolic domain; IPR032880: Calcium permeable stress-gated cation channel 1, N-terminal transmembrane domain	K21989: TMEM63;calcium permeable stress-gated cation channel
Npp.01A009980.1	inositol-tetrakisphosphate 1-kinase 3	Inositol-tetrakisphosphate 1-kinase 3	Inositol-tetrakisphosphate 1-kinase 3	-	GO:0000287: magnesium ion binding; GO:0005524: ATP binding; GO:0032957: inositol trisphosphate metabolic process; GO:0047325: inositol tetrakisphosphate 1-kinase activity; GO:0052725: inositol-1,3,4-trisphosphate 6-kinase activity; GO:0052726: inositol-1,3,4-trisphosphate 5-kinase activity	IPR008656: Inositol-tetrakisphosphate 1-kinase; IPR040464: Inositol 1,3,4-trisphosphate 5/6-kinase, ATP-grasp domain; IPR041429: Inositol-tetrakisphosphate 1-kinase, N-terminal	K00913: ITPK1;inositol-1,3,4-trisphosphate 5/6-kinase / inositol-tetrakisphosphate 1-kinase [EC:2.7.1.159 2.7.1.134]
Npp.01A009990.1	tubulin alpha-3 chain	Tubulin alpha-3 chain	Tubulin alpha-3 chain	-	GO:0003924: GTPase activity; GO:0005200: structural constituent of cytoskeleton; GO:0005525: GTP binding; GO:0005874: microtubule; GO:0007017: microtubule-based process	IPR000217: Tubulin; IPR002452: Alpha tubulin; IPR003008: Tubulin/FtsZ, GTPase domain; IPR008280: Tubulin/FtsZ, C-terminal; IPR017975: Tubulin, conserved site; IPR018316: Tubulin/FtsZ, 2-layer sandwich domain; IPR023123: Tubulin, C-terminal; IPR036525: Tubulin/FtsZ, GTPase domain superfamily; IPR037103: Tubulin/FtsZ, C-terminal domain superfamily	K07374: TUBA;tubulin alpha
Npp.01A010000.1	tubulin alpha-3 chain	Tubulin alpha-3 chain	Tubulin alpha-3 chain	-	GO:0003924: GTPase activity; GO:0005200: structural constituent of cytoskeleton; GO:0005525: GTP binding; GO:0005874: microtubule; GO:0007017: microtubule-based process	IPR000217: Tubulin; IPR002452: Alpha tubulin; IPR003008: Tubulin/FtsZ, GTPase domain; IPR008280: Tubulin/FtsZ, C-terminal; IPR017975: Tubulin, conserved site; IPR018316: Tubulin/FtsZ, 2-layer sandwich domain; IPR023123: Tubulin, C-terminal; IPR036525: Tubulin/FtsZ, GTPase domain superfamily; IPR037103: Tubulin/FtsZ, C-terminal domain superfamily	K07374: TUBA;tubulin alpha
Npp.01A010010.1	26S protease regulatory subunit 6B homolog	26S proteasome regulatory subunit 6B homolog	26S proteasome regulatory subunit 6B homolog	KOG0727: 26S proteasome regulatory complex, ATPase RPT3	GO:0005524: ATP binding; GO:0005737: cytoplasm; GO:0030163: protein catabolic process; GO:0036402: proteasome-activating ATPase activity	IPR003593: AAA+ ATPase domain; IPR003959: ATPase, AAA-type, core; IPR003960: ATPase, AAA-type, conserved site; IPR005937: 26S proteasome regulatory subunit P45-like; IPR027417: P-loop containing nucleoside triphosphate hydrolase; IPR032501: Proteasomal ATPase OB C-terminal domain; IPR035256: 26S Proteasome regulatory subunit 6B; IPR041569: AAA ATPase, AAA+ lid domain	K03063: PSMC4,RPT3;26S proteasome regulatory subunit T3
Npp.01A010020.1	COMPASS-like H3K4 histone methylase component WDR5A	-	-	-	GO:0005515: protein binding	IPR001680: WD40 repeat; IPR015943: WD40/YVTN repeat-like-containing domain superfamily; IPR017986: WD40-repeat-containing domain; IPR019775: WD40 repeat, conserved site; IPR020472: G-protein beta WD-40 repeat; IPR036322: WD40-repeat-containing domain superfamily; IPR037783: Transcription initiation factor TFIID subunit 5	K14963: WDR5,SWD3,CPS30;COMPASS component SWD3
Npp.01A010030.1	transcription factor bHLH18	Transcription factor bHLH25	Transcription factor bHLH25	-	GO:0046983: protein dimerization activity	IPR011598: Myc-type, basic helix-loop-helix (bHLH) domain; IPR036638: Helix-loop-helix DNA-binding domain superfamily	-
Npp.01A010040.1	cyclin-dependent kinase; hypothetical protein SORBI_3001G107500	Cyclin-dependent kinase C-2	Cyclin-dependent kinase C-2	KOG0600: Cdc2-related protein kinase	GO:0004672: protein kinase activity; GO:0005524: ATP binding; GO:0006468: protein phosphorylation	IPR000719: Protein kinase domain; IPR008271: Serine/threonine-protein kinase, active site; IPR011009: Protein kinase-like domain superfamily; IPR017441: Protein kinase, ATP binding site	K08819: CDK12_13;cyclin-dependent kinase 12/13 [EC:2.7.11.22 2.7.11.23]
Npp.01A010050.1	lariat debranching enzyme	Lariat debranching enzyme	Lariat debranching enzyme	KOG2863: RNA lariat debranching enzyme	GO:0006397: mRNA processing; GO:0016788: hydrolase activity, acting on ester bonds	IPR004843: Calcineurin-like phosphoesterase domain, ApaH type; IPR007708: Lariat debranching enzyme, C-terminal; IPR029052: Metallo-dependent phosphatase-like; IPR041816: Lariat debranching enzyme, N-terminal metallophosphatase domain	K18328: DBR1;lariat debranching enzyme [EC:3.1.-.-]
Npp.01A010060.1	hypothetical protein C2845_PM15G10270	-	-	-	-	-	-
Npp.01A010070.1	hypothetical protein Zm00014a_024956; putative B3 domain-containing protein, partial	B3 domain-containing protein LOC_Os12g40080	B3 domain-containing protein LOC_Os12g40080	-	GO:0003677: DNA binding	IPR003340: B3 DNA binding domain; IPR015300: DNA-binding pseudobarrel domain superfamily	-
Npp.01A010080.1	uncharacterized protein LOC8059977; hypothetical protein	-	-	-	-	-	-
Npp.01A010090.1	maf-like protein DDB_G0281937 isoform X1; hypothetical protein BAE44_0008563	7-methyl-GTP pyrophosphatase	7-methyl-GTP pyrophosphatase	-	GO:0047429: nucleoside-triphosphate diphosphatase activity	IPR003697: Nucleoside triphosphate pyrophosphatase Maf-like protein; IPR029001: Inosine triphosphate pyrophosphatase-like	K06287: maf;septum formation protein
Npp.01A010100.1	transcription factor MYB52-like isoform X2	Transcription factor MYB52	Transcription factor MYB52	-	-	IPR001005: SANT/Myb domain; IPR009057: Homeobox-like domain superfamily; IPR017930: Myb domain	K09422: MYBP;transcription factor MYB,plant
Npp.01A010110.1	transcription factor MYB52-like isoform X2	Transcription factor MYB52	Transcription factor MYB52	-	-	IPR001005: SANT/Myb domain; IPR009057: Homeobox-like domain superfamily; IPR017930: Myb domain	K09422: MYBP;transcription factor MYB,plant
Npp.01A010120.1	glutamate decarboxylase 1	Glutamate decarboxylase 1	Glutamate decarboxylase 1	KOG1383: Glutamate decarboxylase/sphingosine phosphate lyase	GO:0004351: glutamate decarboxylase activity; GO:0006536: glutamate metabolic process; GO:0030170: pyridoxal phosphate binding	IPR002129: Pyridoxal phosphate-dependent decarboxylase; IPR010107: Glutamate decarboxylase; IPR015421: Pyridoxal phosphate-dependent transferase, major domain; IPR015424: Pyridoxal phosphate-dependent transferase	K01580: E4.1.1.15,gadB,gadA,GAD;glutamate decarboxylase [EC:4.1.1.15]
Npp.01A010130.1	protein NRT1/ PTR FAMILY 8.3	Protein NRT1/ PTR FAMILY 8.3	Protein NRT1/ PTR FAMILY 8.3	-	GO:0016020: membrane; GO:0022857: transmembrane transporter activity; GO:0055085: transmembrane transport	IPR000109: Proton-dependent oligopeptide transporter family; IPR036259: MFS transporter superfamily	K14638: SLC15A3_4,PHT;solute carrier family 15 (peptide/histidine transporter),member 3/4
Npp.01A010140.1	protein NRT1/ PTR FAMILY 8.3	Protein NRT1/ PTR FAMILY 8.3	Protein NRT1/ PTR FAMILY 8.3	-	GO:0006857: oligopeptide transport; GO:0016020: membrane; GO:0022857: transmembrane transporter activity; GO:0055085: transmembrane transport	IPR000109: Proton-dependent oligopeptide transporter family; IPR018456: PTR2 family proton/oligopeptide symporter, conserved site; IPR036259: MFS transporter superfamily	K14638: SLC15A3_4,PHT;solute carrier family 15 (peptide/histidine transporter),member 3/4
Npp.01A010150.1	probable protein kinase At2g41970	PTI1-like tyrosine-protein kinase 3	PTI1-like tyrosine-protein kinase 3	-	GO:0004713: protein tyrosine kinase activity; GO:0005524: ATP binding; GO:0006468: protein phosphorylation	IPR000719: Protein kinase domain; IPR001245: Serine-threonine/tyrosine-protein kinase, catalytic domain; IPR008266: Tyrosine-protein kinase, active site; IPR011009: Protein kinase-like domain superfamily; IPR017441: Protein kinase, ATP binding site; IPR020635: Tyrosine-protein kinase, catalytic domain	-
Npp.01A010160.1	retrotransposon protein, putative, unclassified	-	-	-	-	IPR013103: Reverse transcriptase, RNA-dependent DNA polymerase	-
Npp.01A010170.1	Protein kinase superfamily protein; uncharacterized protein LOC8059994	Putative dual specificity tyrosine-phosphorylation-regulated kinase 3 homolog	Putative dual specificity tyrosine-phosphorylation-regulated kinase 3 homolog	KOG0667: Dual-specificity tyrosine-phosphorylation regulated kinase	GO:0004672: protein kinase activity; GO:0005524: ATP binding; GO:0006468: protein phosphorylation	IPR000719: Protein kinase domain; IPR008271: Serine/threonine-protein kinase, active site; IPR011009: Protein kinase-like domain superfamily	-
Npp.01A010180.1	putative 3,4-dihydroxy-2-butanone kinase isoform X1	Putative 3,4-dihydroxy-2-butanone kinase	Putative 3,4-dihydroxy-2-butanone kinase	KOG1455: Lysophospholipase; KOG2426: Dihydroxyacetone kinase/glycerone kinase	-	-	-
Npp.01A010190.1	putative 3,4-dihydroxy-2-butanone kinase	Putative 3,4-dihydroxy-2-butanone kinase	Putative 3,4-dihydroxy-2-butanone kinase	KOG2426: Dihydroxyacetone kinase/glycerone kinase	GO:0004371: glycerone kinase activity; GO:0006071: glycerol metabolic process	IPR004006: DhaK domain; IPR004007: DhaL domain; IPR036117: DhaL domain superfamily	-
Npp.01A010200.1	65-kDa microtubule-associated protein 6	65-kDa microtubule-associated protein 6	65-kDa microtubule-associated protein 6	KOG4302: Microtubule-associated protein essential for anaphase spindle elongation	GO:0000226: microtubule cytoskeleton organization; GO:0008017: microtubule binding	IPR007145: Microtubule-associated protein, MAP65/Ase1/PRC1	K16732: PRC1;protein regulator of cytokinesis 1
Npp.01A010210.1	cortical cell-delineating protein	pEARLI1-like lipid transfer protein 1; Putative lipid-binding protein AIR1	pEARLI1-like lipid transfer protein 1; Putative lipid-binding protein AIR1	-	-	IPR016140: Bifunctional inhibitor/plant lipid transfer protein/seed storage helical domain; IPR027923: Hydrophobic seed protein domain; IPR036312: Bifunctional inhibitor/plant lipid transfer protein/seed storage helical domain superfamily	-
Npp.01A010220.1	hypothetical protein OsJ_28076; uncharacterized protein LOC4346152	-	-	-	-	IPR022059: Protein of unknown function DUF3615	-
Npp.01A010230.1	ILITYHIA	-	-	-	GO:0006417: regulation of translation; GO:0019887: protein kinase regulator activity; GO:0019901: protein kinase binding; GO:0033674: positive regulation of kinase activity; GO:0043022: ribosome binding	IPR011989: Armadillo-like helical; IPR016024: Armadillo-type fold; IPR033173: Translational activator Gcn1	-
Npp.01A010240.1	65-kDa microtubule-associated protein 6	65-kDa microtubule-associated protein 6	65-kDa microtubule-associated protein 6	KOG4302: Microtubule-associated protein essential for anaphase spindle elongation	GO:0000226: microtubule cytoskeleton organization; GO:0008017: microtubule binding	IPR007145: Microtubule-associated protein, MAP65/Ase1/PRC1	-
Npp.01A010250.1	cortical cell-delineating protein	pEARLI1-like lipid transfer protein 1; Putative lipid-binding protein AIR1	pEARLI1-like lipid transfer protein 1; Putative lipid-binding protein AIR1	-	-	IPR016140: Bifunctional inhibitor/plant lipid transfer protein/seed storage helical domain; IPR027923: Hydrophobic seed protein domain; IPR036312: Bifunctional inhibitor/plant lipid transfer protein/seed storage helical domain superfamily	-
Npp.01A010260.1	hypothetical protein OsJ_28076; uncharacterized protein LOC4346152	-	-	-	-	-	-
Npp.01A010270.1	hypothetical protein DCAR_018971; Calmodulin-1	Calmodulin-like protein 4	Calmodulin-like protein 4	-	GO:0005509: calcium ion binding; GO:0019722: calcium-mediated signaling	IPR002048: EF-hand domain; IPR011992: EF-hand domain pair; IPR018247: EF-Hand 1, calcium-binding site; IPR039030: Calmodulin	-
Npp.01A010280.1	cytochrome c oxidase assembly protein ctaG	Cytochrome c oxidase assembly protein COX11, mitochondrial	Cytochrome c oxidase assembly protein COX11, mitochondrial	KOG2540: Cytochrome oxidase assembly factor COX11	GO:0005507: copper ion binding	IPR007533: Cytochrome c oxidase assembly protein CtaG/Cox11; IPR023471: Cytochrome c oxidase assembly protein CtaG/Cox11, domain superfamily	K02258: COX11,ctaG;cytochrome c oxidase assembly protein subunit 11
Npp.01A010310.1	Putative clathrin assembly protein	-	-	-	GO:0005543: phospholipid binding	IPR008942: ENTH/VHS; IPR011417: AP180 N-terminal homology (ANTH) domain; IPR013809: ENTH domain	-
Npp.01A010320.1	actin, other eukaryote; PREDICTED: actin-1	Actin-1	Actin-1	-	-	IPR004000: Actin family; IPR004001: Actin, conserved site; IPR020902: Actin/actin-like conserved site; IPR043129: ATPase, nucleotide binding domain	K10355: ACTF;actin,other eukaryote
Npp.01A010330.1	uncharacterized protein LOC103651125	-	-	-	-	IPR036691: Endonuclease/exonuclease/phosphatase superfamily	-
Npp.01A010340.1	anthranilate synthase beta subunit 2, chloroplastic isoform X2	Anthranilate synthase beta subunit 2, chloroplastic	Anthranilate synthase beta subunit 2, chloroplastic	KOG0026: Anthranilate synthase, beta chain; KOG1224: Para-aminobenzoate (PABA) synthase ABZ1	-	IPR017926: Glutamine amidotransferase; IPR029062: Class I glutamine amidotransferase-like	K01658: trpG;anthranilate synthase component II [EC:4.1.3.27]
Npp.01A010350.1	UV-B-induced protein At3g17800, chloroplastic-like	-	-	-	-	IPR008479: Protein of unknown function DUF760; IPR038925: UV-B-induced protein At3g17800-like	-
Npp.01A010360.1	probable histidine kinase 4	Probable histidine kinase 4	Probable histidine kinase 4	KOG0519: Sensory transduction histidine kinase	GO:0000155: phosphorelay sensor kinase activity; GO:0000160: phosphorelay signal transduction system; GO:0016310: phosphorylation	IPR001789: Signal transduction response regulator, receiver domain; IPR003594: Histidine kinase/HSP90-like ATPase; IPR003661: Signal transduction histidine kinase, dimerisation/phosphoacceptor domain; IPR004358: Signal transduction histidine kinase-related protein, C-terminal; IPR005467: Histidine kinase domain; IPR006189: CHASE domain; IPR011006: CheY-like superfamily; IPR036097: Signal transduc…	K14489: AHK2_3_4;arabidopsis histidine kinase 2/3/4 (cytokinin receptor) [EC:2.7.13.3]
Npp.01A010380.1	uncharacterized protein LOC8060005	-	-	-	GO:0008270: zinc ion binding	IPR011016: Zinc finger, RING-CH-type; IPR013083: Zinc finger, RING/FYVE/PHD-type	-
Npp.01A010390.1	probable transmembrane ascorbate ferrireductase 3	Cytochrome b561; Probable transmembrane ascorbate ferrireductase 3	Cytochrome b561; Probable transmembrane ascorbate ferrireductase 3	KOG1619: Cytochrome b	GO:0016491: oxidoreductase activity	IPR006593: Cytochrome b561/ferric reductase transmembrane; IPR043205: Cytochrome b561/Cytochrome b reductase 1-like	K08360: CYB561;cytochrome b-561 [EC:7.2.1.3]
Npp.01A010400.1	Receptor protein kinase TMK1	Receptor protein kinase TMK1	Receptor protein kinase TMK1	-	GO:0004672: protein kinase activity; GO:0005524: ATP binding; GO:0006468: protein phosphorylation	IPR000719: Protein kinase domain; IPR001245: Serine-threonine/tyrosine-protein kinase, catalytic domain; IPR003591: Leucine-rich repeat, typical subtype; IPR008271: Serine/threonine-protein kinase, active site; IPR011009: Protein kinase-like domain superfamily; IPR013210: Leucine-rich repeat-containing N-terminal, plant-type; IPR017441: Protein kinase, ATP binding site; IPR032675: Leucine-rich re…	-
Npp.01A010410.1	hypothetical protein SETIT_9G116800v2	-	-	-	-	-	-
Npp.01A010420.1	hypothetical protein C2845_PM02G15010; protein FAR1-RELATED SEQUENCE 5-like	Protein FAR1-RELATED SEQUENCE 5	Protein FAR1-RELATED SEQUENCE 5	-	GO:0006355: regulation of transcription, DNA-templated; GO:0008270: zinc ion binding	IPR007527: Zinc finger, SWIM-type; IPR031052: FHY3/FAR1 family	-
Npp.01A010430.1	protein FAR1-RELATED SEQUENCE 5-like isoform X2; hypothetical protein SORBI_3005G106366	-	-	-	-	-	-
Npp.01A010440.1	hypothetical protein BAE44_0025693	-	-	-	-	-	-
Npp.01A010450.1	uncharacterized protein LOC101785361	-	-	-	GO:0005769: early endosome; GO:0034314: Arp2/3 complex-mediated actin nucleation; GO:0043014: alpha-tubulin binding; GO:0071203: WASH complex	IPR021854: WASH1, WAHD domain; IPR028290: WASH1	-
Npp.01A010460.1	binding partner of ACD11 1 isoform X1	-	-	-	GO:0003676: nucleic acid binding	IPR000504: RNA recognition motif domain; IPR012677: Nucleotide-binding alpha-beta plait domain superfamily; IPR034360: Vip1-like, RNA recognition motif, plant; IPR035979: RNA-binding domain superfamily	-
Npp.01A010470.1	hypothetical protein OsI_33725; BTB/POZ and MATH domain-containing protein 2	BTB/POZ and MATH domain-containing protein 3	BTB/POZ and MATH domain-containing protein 3	-	-	-	-
Npp.01A010480.1	mitogen-activated protein kinase kinase 9-like	Mitogen-activated protein kinase kinase 9	Mitogen-activated protein kinase kinase 9	KOG0579: Ste20-like serine/threonine protein kinase; KOG0581: Mitogen-activated protein kinase kinase (MAP2K)	GO:0004672: protein kinase activity; GO:0005524: ATP binding; GO:0006468: protein phosphorylation	IPR000719: Protein kinase domain; IPR008271: Serine/threonine-protein kinase, active site; IPR011009: Protein kinase-like domain superfamily; IPR017441: Protein kinase, ATP binding site	K20604: MKK9;mitogen-activated protein kinase kinase 9 [EC:2.7.12.2]
Npp.01A010490.1	mitogen-activated protein kinase kinase 9-like	Mitogen-activated protein kinase kinase 9	Mitogen-activated protein kinase kinase 9	KOG0581: Mitogen-activated protein kinase kinase (MAP2K)	GO:0004672: protein kinase activity; GO:0005524: ATP binding; GO:0006468: protein phosphorylation	IPR000719: Protein kinase domain; IPR011009: Protein kinase-like domain superfamily; IPR017441: Protein kinase, ATP binding site	-
Npp.01A010500.1	Mitogen-activated protein kinase kinase 7	Mitogen-activated protein kinase kinase 9	Mitogen-activated protein kinase kinase 9	KOG0581: Mitogen-activated protein kinase kinase (MAP2K)	GO:0004672: protein kinase activity; GO:0005524: ATP binding; GO:0006468: protein phosphorylation	IPR000719: Protein kinase domain; IPR008271: Serine/threonine-protein kinase, active site; IPR011009: Protein kinase-like domain superfamily; IPR017441: Protein kinase, ATP binding site	K20604: MKK9;mitogen-activated protein kinase kinase 9 [EC:2.7.12.2]
Npp.01A010510.1	exportin-2	Exportin-2	Exportin-2	KOG1992: Nuclear export receptor CSE1/CAS (importin beta superfamily)	GO:0008536: Ran GTPase binding	IPR005043: Exportin-2, C-terminal; IPR011989: Armadillo-like helical; IPR016024: Armadillo-type fold	-
Npp.01A010520.1	Phosphatidylinositol 4-kinase alpha 1	Phosphatidylinositol 4-kinase alpha 2	Phosphatidylinositol 4-kinase alpha 2	KOG0902: Phosphatidylinositol 4-kinase; KOG0903: Phosphatidylinositol 4-kinase, involved in intracellular trafficking and secretion	GO:0016301: kinase activity; GO:0046854: phosphatidylinositol phosphorylation; GO:0048015: phosphatidylinositol-mediated signaling	IPR000403: Phosphatidylinositol 3-/4-kinase, catalytic domain; IPR011009: Protein kinase-like domain superfamily; IPR015433: Phosphatidylinositol kinase; IPR036940: Phosphatidylinositol 3-/4-kinase, catalytic domain superfamily	K19801: PI4KB;phosphatidylinositol 4-kinase B [EC:2.7.1.67]
Npp.01A010530.1	zinc finger protein CONSTANS-LIKE 16	Zinc finger protein CONSTANS-LIKE 16	Zinc finger protein CONSTANS-LIKE 16	-	GO:0005515: protein binding; GO:0008270: zinc ion binding	IPR000315: B-box-type zinc finger; IPR010402: CCT domain	-
Npp.01A010540.1	protein CASP	Protein CASP; Homeobox protein cut-like 1	Protein CASP; Homeobox protein cut-like 1	KOG0963: Transcription factor/CCAAT displacement protein CDP1	GO:0006891: intra-Golgi vesicle-mediated transport; GO:0030173: integral component of Golgi membrane	IPR012955: CASP, C-terminal	K09313: CUTL;homeobox protein cut-like
Npp.01A010560.1	-	-	-	KOG2263: Methionine synthase II (cobalamin-independent)	GO:0003871: 5-methyltetrahydropteroyltriglutamate-homocysteine S-methyltransferase activity; GO:0008270: zinc ion binding; GO:0008652: cellular amino acid biosynthetic process	IPR013215: Cobalamin-independent methionine synthase MetE, N-terminal; IPR038071: UROD/MetE-like superfamily	-
Npp.01A010570.1	ACD11 homolog protein; hypothetical protein ZEAMMB73_Zm00001d013445	-	-	-	GO:0005737: cytoplasm; GO:0120009: intermembrane lipid transfer; GO:0120013: intermembrane lipid transfer activity	IPR014830: Glycolipid transfer protein domain; IPR036497: Glycolipid transfer protein superfamily	-
Npp.01A010580.1	hypothetical protein PAHAL_9G073900; uncharacterized protein C2845_PM12G21620	-	-	-	-	IPR011047: Quinoprotein alcohol dehydrogenase-like superfamily; IPR012871: Protein of unknown function DUF1677, Oryza sativa	-
Npp.01A010590.1	kinase	Probable inactive receptor kinase At1g48480	Probable inactive receptor kinase At1g48480	-	GO:0004672: protein kinase activity; GO:0005515: protein binding; GO:0005524: ATP binding; GO:0006468: protein phosphorylation	IPR000719: Protein kinase domain; IPR001611: Leucine-rich repeat; IPR011009: Protein kinase-like domain superfamily; IPR013210: Leucine-rich repeat-containing N-terminal, plant-type; IPR017441: Protein kinase, ATP binding site; IPR032675: Leucine-rich repeat domain superfamily	-
Npp.01A010600.1	protein POLLEN DEFECTIVE IN GUIDANCE 1; hypothetical protein SORBI_3001G114200	Protein TAPT1 homolog	Protein TAPT1 homolog	KOG2490: Predicted membrane protein	-	IPR008010: Tapt1 family	-
Npp.01A010610.1	vam6/Vps39-like protein; vacuolar sorting protein 39	Transforming growth factor-beta receptor-associated protein 1 homolog; Vacuolar sorting protein 39	Transforming growth factor-beta receptor-associated protein 1 homolog; Vacuolar sorting protein 39	KOG2063: Vacuolar assembly/sorting proteins VPS39/VAM6/VPS3	-	-	K20183: VPS39,VAM6;Vam6/Vps39-like protein vacuolar protein sorting-associated protein 39
Npp.01A010640.1	BTB/POZ domain-containing protein At1g63850	BTB/POZ domain-containing protein At1g63850	BTB/POZ domain-containing protein At1g63850	-	-	IPR021109: Aspartic peptidase domain superfamily; IPR038920: BTB/POZ domain-containing protein	-
Npp.01A010650.1	uncharacterized protein LOC8063354	-	-	-	-	-	-
Npp.01A010660.1	Scarecrow-like protein 4	DELLA protein RGL2; Scarecrow-like protein 4	DELLA protein RGL2; Scarecrow-like protein 4	-	-	IPR005202: Transcription factor GRAS	-
Npp.01A010670.1	hypothetical protein SORBI_3006G139200	-	-	-	-	-	-
Npp.01A010680.1	cyclase-associated protein 1	Cyclase-associated protein 1	Cyclase-associated protein 1	KOG2675: Adenylate cyclase-associated protein (CAP/Srv2p)	GO:0000902: cell morphogenesis; GO:0003779: actin binding; GO:0007010: cytoskeleton organization	IPR001837: Adenylate cyclase-associated CAP; IPR006599: CARP motif; IPR013912: Adenylate cyclase-associated CAP, C-terminal; IPR013992: Adenylate cyclase-associated CAP, N-terminal; IPR016098: Cyclase-associated protein CAP/septum formation inhibitor MinC, C-terminal; IPR017901: C-CAP/cofactor C-like domain; IPR018106: CAP, conserved site, N-terminal; IPR036222: Adenylate cyclase-associated CAP, …	K17261: CAP1_2,SRV2;adenylyl cyclase-associated protein
Npp.01A010690.1	glucan endo-1,3-beta-glucosidase 7	Glucan endo-1,3-beta-glucosidase 7	Glucan endo-1,3-beta-glucosidase 7	-	GO:0004553: hydrolase activity, hydrolyzing O-glycosyl compounds; GO:0005975: carbohydrate metabolic process	IPR000490: Glycoside hydrolase family 17; IPR017853: Glycoside hydrolase superfamily	-
Npp.01A010700.1	ATP-dependent DNA helicase DDM1	ISWI chromatin-remodeling complex ATPase CHR17; Probable global transcription activator SNF2L1	ISWI chromatin-remodeling complex ATPase CHR17; Probable global transcription activator SNF2L1	KOG0385: Chromatin remodeling complex WSTF-ISWI, small subunit; KOG0386: Chromatin remodeling complex SWI/SNF, component SWI2 and related ATPases (DNA/RNA helicase superfamily)	GO:0005524: ATP binding	IPR000330: SNF2-related, N-terminal domain; IPR001650: Helicase, C-terminal; IPR014001: Helicase superfamily 1/2, ATP-binding domain; IPR027417: P-loop containing nucleoside triphosphate hydrolase; IPR038718: SNF2-like, N-terminal domain superfamily	K19001: HELLS,DDM1;ATP-dependent DNA helicase
Npp.01A010710.1	serine/threonine-protein kinase ATG1c isoform X2	Serine/threonine-protein kinase ATG1c	Serine/threonine-protein kinase ATG1c	KOG0595: Serine/threonine-protein kinase involved in autophagy	GO:0004672: protein kinase activity; GO:0005524: ATP binding; GO:0006468: protein phosphorylation	IPR000719: Protein kinase domain; IPR008271: Serine/threonine-protein kinase, active site; IPR011009: Protein kinase-like domain superfamily; IPR017441: Protein kinase, ATP binding site	K08269: ULK2,ATG1;serine/threonine-protein kinase ULK2 [EC:2.7.11.1]
Npp.01A010730.1	serine/threonine-protein phosphatase PP1 isoform X2	Serine/threonine-protein phosphatase PP1	Serine/threonine-protein phosphatase PP1	-	GO:0016787: hydrolase activity	IPR004843: Calcineurin-like phosphoesterase domain, ApaH type; IPR006186: Serine/threonine-specific protein phosphatase/bis(5-nucleosyl)-tetraphosphatase; IPR029052: Metallo-dependent phosphatase-like; IPR031675: Serine-threonine protein phosphatase, N-terminal	-
Npp.01A010740.1	LOW QUALITY PROTEIN: serine/threonine-protein phosphatase PP1	Serine/threonine-protein phosphatase PP1	Serine/threonine-protein phosphatase PP1	-	GO:0016787: hydrolase activity	IPR006186: Serine/threonine-specific protein phosphatase/bis(5-nucleosyl)-tetraphosphatase; IPR029052: Metallo-dependent phosphatase-like; IPR031675: Serine-threonine protein phosphatase, N-terminal	-
Npp.01A010750.1	LOW QUALITY PROTEIN: protein STRICTOSIDINE SYNTHASE-LIKE 13	Protein STRICTOSIDINE SYNTHASE-LIKE 13; Adipocyte plasma membrane-associated protein	Protein STRICTOSIDINE SYNTHASE-LIKE 13; Adipocyte plasma membrane-associated protein	KOG1520: Predicted alkaloid synthase/Surface mucin Hemomucin	GO:0009058: biosynthetic process; GO:0016844: strictosidine synthase activity	IPR011042: Six-bladed beta-propeller, TolB-like; IPR018119: Strictosidine synthase, conserved region	-
Npp.01A010760.1	splicing factor 3A subunit 2	Splicing factor 3A subunit 2	Splicing factor 3A subunit 2	KOG0227: Splicing factor 3a, subunit 2	GO:0003676: nucleic acid binding; GO:0005634: nucleus; GO:0008270: zinc ion binding	IPR000690: Matrin/U1-C, C2H2-type zinc finger; IPR003604: Matrin/U1-C-like, C2H2-type zinc finger; IPR031781: SF3A2 domain; IPR036236: Zinc finger C2H2 superfamily	K12826: SF3A2,SAP62;splicing factor 3A subunit 2
Npp.01A010770.1	mitochondrial phosphate carrier protein 3, mitochondrial	Mitochondrial phosphate carrier protein 3, mitochondrial	Mitochondrial phosphate carrier protein 3, mitochondrial	KOG0767: Mitochondrial phosphate carrier protein	-	IPR018108: Mitochondrial substrate/solute carrier; IPR023395: Mitochondrial carrier domain superfamily	K15102: SLC25A3,PHC,PIC;solute carrier family 25 (mitochondrial phosphate transporter),member 3
Npp.01A010780.1	nodulation-signaling pathway 2 protein; hypothetical protein SORBI_3001G428600	Protein SCARECROW; GRAS family protein RAM1	Protein SCARECROW; GRAS family protein RAM1	-	-	IPR005202: Transcription factor GRAS; IPR030028: Scarecrow-like protein 26/nodulation signalling pathway 2	-
Npp.01A010790.1	ethylene-responsive transcription factor ERF014; hypothetical protein GQ55_9G533300	Ethylene-responsive transcription factor ERF013	Ethylene-responsive transcription factor ERF013	-	GO:0003677: DNA binding; GO:0003700: DNA binding transcription factor activity; GO:0006355: regulation of transcription, DNA-templated	IPR001471: AP2/ERF domain; IPR016177: DNA-binding domain superfamily; IPR036955: AP2/ERF domain superfamily	-
Npp.01A010800.1	vacuolar protein sorting-associated protein 9A	Vacuolar protein sorting-associated protein 9A; Rab5 GDP/GTP exchange factor	Vacuolar protein sorting-associated protein 9A; Rab5 GDP/GTP exchange factor	KOG2319: Vacuolar assembly/sorting protein VPS9	-	IPR003123: VPS9 domain; IPR037191: VPS9 domain superfamily; IPR041545: RABX5, catalytic core helical domain	K20131: RABGEF1;Rab5 GDP/GTP exchange factor
Npp.01A010810.1	G-type lectin S-receptor-like serine/threonine-protein kinase At2g19130	G-type lectin S-receptor-like serine/threonine-protein kinase At2g19130	G-type lectin S-receptor-like serine/threonine-protein kinase At2g19130	-	GO:0004674: protein serine/threonine kinase activity; GO:0005524: ATP binding; GO:0006468: protein phosphorylation; GO:0048544: recognition of pollen	IPR000719: Protein kinase domain; IPR000858: S-locus glycoprotein domain; IPR001480: Bulb-type lectin domain; IPR003609: PAN/Apple domain; IPR008271: Serine/threonine-protein kinase, active site; IPR011009: Protein kinase-like domain superfamily; IPR017441: Protein kinase, ATP binding site; IPR024171: S-receptor-like serine/threonine-protein kinase; IPR036426: Bulb-type lectin domain superfamily	-
Npp.01A010820.1	uncharacterized protein LOC8054297	-	-	-	-	-	-
Npp.01A010830.1	eukaryotic translation initiation factor NCBP	Eukaryotic translation initiation factor NCBP	Eukaryotic translation initiation factor NCBP	KOG1669: Predicted mRNA cap-binding protein related to eIF-4E; KOG1670: Translation initiation factor 4F, cap-binding subunit (eIF-4E) and related cap-binding proteins	GO:0003743: translation initiation factor activity; GO:0005737: cytoplasm; GO:0006413: translational initiation	IPR001040: Translation Initiation factor eIF- 4e; IPR019770: Eukaryotic translation initiation factor 4E (eIF-4E), conserved site; IPR023398: Translation Initiation factor eIF- 4e-like	K03259: EIF4E;translation initiation factor 4E
Npp.01A010840.1	P-loop containing nucleoside triphosphate hydrolase superfamily protein; uncharacterized protein LOC8054300 isoform X2	-	-	KOG1969: DNA replication checkpoint protein CHL12/CTF18	GO:0006281: DNA repair; GO:0042025: host cell nucleus	IPR004582: Checkpoint protein Rad17/Rad24; IPR027417: P-loop containing nucleoside triphosphate hydrolase	-
Npp.01A010850.1	ATPase family AAA domain-containing protein 5; uncharacterized protein LOC8054300 isoform X1	-	-	-	GO:0006281: DNA repair; GO:0042025: host cell nucleus	IPR004582: Checkpoint protein Rad17/Rad24; IPR027417: P-loop containing nucleoside triphosphate hydrolase	-
Npp.01A010860.1	mitogen-activated protein kinase kinase kinase 1	Mitogen-activated protein kinase kinase kinase 1	Mitogen-activated protein kinase kinase kinase 1	-	GO:0004672: protein kinase activity; GO:0005524: ATP binding; GO:0006468: protein phosphorylation	IPR000719: Protein kinase domain; IPR008271: Serine/threonine-protein kinase, active site; IPR011009: Protein kinase-like domain superfamily; IPR017441: Protein kinase, ATP binding site	K13414: MEKK1;mitogen-activated protein kinase kinase kinase 1 [EC:2.7.11.25]
Npp.01A010870.1	BTB/POZ domain-containing protein At3g09030	BTB/POZ domain-containing protein At3g09030	BTB/POZ domain-containing protein At3g09030	-	GO:0005515: protein binding	IPR011044: Quinoprotein amine dehydrogenase, beta chain-like; IPR011333: SKP1/BTB/POZ domain superfamily; IPR015943: WD40/YVTN repeat-like-containing domain superfamily	-
Npp.01A010890.1	uncharacterized protein LOC8054291; hypothetical protein BAE44_0024056	-	-	-	-	IPR013087: Zinc finger C2H2-type	-
Npp.01A010910.1	anthranilate synthase alpha subunit 2, chloroplastic	Anthranilate synthase alpha subunit 2, chloroplastic	Anthranilate synthase alpha subunit 2, chloroplastic	KOG1223: Isochorismate synthase; KOG1224: Para-aminobenzoate (PABA) synthase ABZ1	GO:0000162: tryptophan biosynthetic process; GO:0004049: anthranilate synthase activity	IPR005256: Anthranilate synthase component I, PabB-like; IPR005801: ADC synthase; IPR006805: Anthranilate synthase component I, N-terminal; IPR015890: Chorismate-utilising enzyme, C-terminal; IPR019999: Anthranilate synthase component I-like	K01657: trpE;anthranilate synthase component I [EC:4.1.3.27]
Npp.01A010920.1	sulfoquinovosyl transferase SQD2	Sulfoquinovosyl transferase SQD2	Sulfoquinovosyl transferase SQD2	-	-	-	K06119: SQD2;sulfoquinovosyltransferase [EC:2.4.1.-]
Npp.01A010930.1	josephin-like protein	Josephin-like protein	Josephin-like protein	KOG2934: Uncharacterized conserved protein, contains Josephin domain	GO:0004843: thiol-dependent ubiquitin-specific protease activity; GO:0016579: protein deubiquitination	IPR006155: Josephin domain; IPR040053: Josephin-1/2	-
Npp.01A010940.1	serine/arginine-rich splicing factor SR45a isoform X2	31 kDa ribonucleoprotein, chloroplastic	31 kDa ribonucleoprotein, chloroplastic	KOG4661: Hsp27-ERE-TATA-binding protein/Scaffold attachment factor (SAF-B)	GO:0003676: nucleic acid binding	IPR000504: RNA recognition motif domain; IPR012677: Nucleotide-binding alpha-beta plait domain superfamily; IPR035979: RNA-binding domain superfamily	-
Npp.01A010950.1	uncharacterized protein LOC8081533; SH3 domain-containing protein	-	-	-	GO:0005515: protein binding	IPR001452: SH3 domain; IPR011989: Armadillo-like helical; IPR016024: Armadillo-type fold; IPR036028: SH3-like domain superfamily	-
Npp.01A010960.1	uncharacterized protein LOC8054288; hypothetical protein Zm00014a_019249	-	-	-	-	IPR009305: 2-hydroxy-palmitic acid dioxygenase Mpo1-like	-
Npp.01A010970.1	uncharacterized protein LOC8081532; hypothetical protein Zm00014a_019257	-	-	-	-	-	-
Npp.01A010980.1	OTU domain-containing protein At3g57810	OVARIAN TUMOR DOMAIN-containing deubiquitinating enzyme 3	OVARIAN TUMOR DOMAIN-containing deubiquitinating enzyme 3	-	GO:0004843: thiol-dependent ubiquitin-specific protease activity; GO:0016579: protein deubiquitination; GO:0030433: ubiquitin-dependent ERAD pathway	IPR003323: OTU domain; IPR038765: Papain-like cysteine peptidase superfamily; IPR039138: Ubiquitin thioesterase OTU1/2/3	-
Npp.01A010990.1	LIM domain-containing protein WLIM2a	LIM domain-containing protein WLIM2a; Cysteine and glycine-rich protein 3	LIM domain-containing protein WLIM2a; Cysteine and glycine-rich protein 3	KOG1700: Regulatory protein MLP and related LIM proteins	-	IPR001781: Zinc finger, LIM-type	K09377: CSRP;cysteine and glycine-rich protein
Npp.01A011000.1	cytosolic enolase 3	Cytosolic enolase 3	Cytosolic enolase 3	KOG2670: Enolase	GO:0000015: phosphopyruvate hydratase complex; GO:0000287: magnesium ion binding; GO:0004634: phosphopyruvate hydratase activity; GO:0006096: glycolytic process	IPR000941: Enolase; IPR020809: Enolase, conserved site; IPR020810: Enolase, C-terminal TIM barrel domain; IPR020811: Enolase, N-terminal; IPR029017: Enolase-like, N-terminal; IPR036849: Enolase-like, C-terminal domain superfamily	K01689: ENO,eno;enolase [EC:4.2.1.11]
Npp.01A011010.1	17.9 kDa class I heat shock protein	17.9 kDa class I heat shock protein	17.9 kDa class I heat shock protein	KOG0710: Molecular chaperone (small heat-shock protein Hsp26/Hsp42)	-	IPR002068: Alpha crystallin/Hsp20 domain; IPR008978: HSP20-like chaperone; IPR031107: Small heat shock protein HSP20	K13993: HSP20;HSP20 family protein
Npp.01A011020.1	protein ENHANCED DOWNY MILDEW 2	-	-	-	-	IPR001965: Zinc finger, PHD-type; IPR011011: Zinc finger, FYVE/PHD-type; IPR013083: Zinc finger, RING/FYVE/PHD-type	-
Npp.01A011030.1	hypothetical protein LOC_Os12g26020; uncharacterized protein LOC112939022	-	-	-	GO:0003677: DNA binding	IPR003656: Zinc finger, BED-type; IPR007021: Domain of unknown function DUF659; IPR012337: Ribonuclease H-like superfamily	-
Npp.01A011040.1	LRR receptor-like serine/threonine-protein kinase FEI 1	LRR receptor-like serine/threonine-protein kinase FEI 1	LRR receptor-like serine/threonine-protein kinase FEI 1	-	GO:0004672: protein kinase activity; GO:0005515: protein binding; GO:0005524: ATP binding; GO:0006468: protein phosphorylation	IPR000719: Protein kinase domain; IPR001611: Leucine-rich repeat; IPR008271: Serine/threonine-protein kinase, active site; IPR011009: Protein kinase-like domain superfamily; IPR013210: Leucine-rich repeat-containing N-terminal, plant-type; IPR017441: Protein kinase, ATP binding site; IPR032675: Leucine-rich repeat domain superfamily	-
Npp.01A011050.1	17.9 kDa class I heat shock protein	17.9 kDa class I heat shock protein	17.9 kDa class I heat shock protein	KOG0710: Molecular chaperone (small heat-shock protein Hsp26/Hsp42)	-	IPR002068: Alpha crystallin/Hsp20 domain; IPR008978: HSP20-like chaperone; IPR031107: Small heat shock protein HSP20	K13993: HSP20;HSP20 family protein
Npp.01A011060.1	17.9 kDa class I heat shock protein	18.1 kDa class I heat shock protein	18.1 kDa class I heat shock protein	KOG0710: Molecular chaperone (small heat-shock protein Hsp26/Hsp42)	-	IPR002068: Alpha crystallin/Hsp20 domain; IPR008978: HSP20-like chaperone; IPR031107: Small heat shock protein HSP20	K13993: HSP20;HSP20 family protein
Npp.01A011070.1	fructose-1,6-bisphosphatase, chloroplastic	Fructose-1,6-bisphosphatase, chloroplastic	Fructose-1,6-bisphosphatase, chloroplastic	KOG1458: Fructose-1,6-bisphosphatase	GO:0005975: carbohydrate metabolic process; GO:0042132: fructose 1,6-bisphosphate 1-phosphatase activity	IPR000146: Fructose-1,6-bisphosphatase class 1; IPR020548: Fructose-1,6-bisphosphatase, active site; IPR028343: Fructose-1,6-bisphosphatase; IPR033391: Fructose-1-6-bisphosphatase class I, N-terminal	K03841: FBP,fbp;fructose-1,6-bisphosphatase I [EC:3.1.3.11]
Npp.01A011080.1	uncharacterized protein LOC8085601; hypothetical protein Zm00014a_019256	-	-	-	-	IPR006873: Protein of unknown function DUF620	-
Npp.01A011090.1	uncharacterized protein LOC8081524; hypothetical protein Zm00014a_019262	-	-	-	-	IPR021916: Protein of unknown function DUF3527	-
Npp.01A011100.1	mitochondrial substrate carrier family protein B	Mitochondrial substrate carrier family protein B	Mitochondrial substrate carrier family protein B	KOG0036: Predicted mitochondrial carrier protein	GO:0005347: ATP transmembrane transporter activity; GO:0055085: transmembrane transport	IPR002067: Mitochondrial carrier protein; IPR018108: Mitochondrial substrate/solute carrier; IPR023395: Mitochondrial carrier domain superfamily	K14684: SLC25A23S;solute carrier family 25 (mitochondrial phosphate transporter),member 23/24/25/41
Npp.01A011110.1	protein DA1-related 2 isoform X1	Protein DA1-related 2	Protein DA1-related 2	-	-	IPR001781: Zinc finger, LIM-type; IPR003903: Ubiquitin interacting motif; IPR022087: Protein DA1-like	-
Npp.01A011120.1	uncharacterized protein LOC8081520	-	-	-	-	IPR006740: Protein of unknown function DUF604	-
Npp.01A011130.1	hydroxymethylpyrimidine phosphate synthase1	Phosphomethylpyrimidine synthase, chloroplastic	Phosphomethylpyrimidine synthase, chloroplastic	-	-	-	K03147: thiC;phosphomethylpyrimidine synthase [EC:4.1.99.17]
Npp.01A011140.1	cytochrome P450 89A2; hypothetical protein GQ55_7G025700	Cytochrome P450 77A1 (Fragment)	Cytochrome P450 77A1 (Fragment)	-	GO:0005506: iron ion binding; GO:0016705: oxidoreductase activity, acting on paired donors, with incorporation or reduction of molecular oxygen; GO:0020037: heme binding; GO:0055114: oxidation-reduction process	IPR001128: Cytochrome P450; IPR002401: Cytochrome P450, E-class, group I; IPR017972: Cytochrome P450, conserved site; IPR036396: Cytochrome P450 superfamily	-
Npp.01A011150.1	tankyrase-1	Stress-induced-phosphoprotein 1	Stress-induced-phosphoprotein 1	KOG0548: Molecular co-chaperone STI1	-	-	-
Npp.01A011160.1	hypothetical protein SETIT_9G217800v2; uncharacterized protein LOC105915122	-	-	-	-	-	-
Npp.01A011170.1	hypothetical protein PAHAL_7G239600; GATA transcription factor 26	GATA transcription factor 26	GATA transcription factor 26	-	GO:0006355: regulation of transcription, DNA-templated; GO:0008270: zinc ion binding; GO:0043565: sequence-specific DNA binding	IPR000679: Zinc finger, GATA-type; IPR013088: Zinc finger, NHR/GATA-type	-
Npp.01A011180.1	BEL1-like homeodomain protein 11	BEL1-like homeodomain protein 11	BEL1-like homeodomain protein 11	-	GO:0003677: DNA binding; GO:0006355: regulation of transcription, DNA-templated	IPR001356: Homeobox domain; IPR006563: POX domain; IPR008422: Homeobox KN domain; IPR009057: Homeobox-like domain superfamily	-
Npp.01A011190.1	BEL1-like homeodomain protein 7	BEL1-like homeodomain protein 7	BEL1-like homeodomain protein 7	-	GO:0003677: DNA binding; GO:0006355: regulation of transcription, DNA-templated	IPR001356: Homeobox domain; IPR006563: POX domain; IPR008422: Homeobox KN domain; IPR009057: Homeobox-like domain superfamily	-
Npp.01A011220.1	protein SABRE isoform X1	Protein SABRE	Protein SABRE	-	-	IPR019441: FMP27, GFWDK domain; IPR019443: FMP27, C-terminal	-
Npp.01A011230.1	probable ubiquitin-conjugating enzyme E2 18	Probable ubiquitin-conjugating enzyme E2 18	Probable ubiquitin-conjugating enzyme E2 18	KOG0427: Ubiquitin conjugating enzyme	-	IPR000608: Ubiquitin-conjugating enzyme E2; IPR016135: Ubiquitin-conjugating enzyme/RWD-like	K10688: UBE2W,UBC16;ubiquitin-conjugating enzyme E2 W [EC:2.3.2.25]
Npp.01A011240.1	dual specificity protein phosphatase 1B	Dual specificity protein phosphatase 1	Dual specificity protein phosphatase 1	KOG1717: Dual specificity phosphatase	GO:0006470: protein dephosphorylation; GO:0008138: protein tyrosine/serine/threonine phosphatase activity	IPR000340: Dual specificity phosphatase, catalytic domain; IPR000387: Tyrosine specific protein phosphatases domain; IPR020422: Dual specificity protein phosphatase domain; IPR029021: Protein-tyrosine phosphatase-like	-
Npp.01A011250.1	serine/threonine protein phosphatase 2A 57 kDa regulatory subunit B&apos; alpha isoform-like isoform X1	Serine/threonine protein phosphatase 2A 57 kDa regulatory subunit B&apos; beta isoform	Serine/threonine protein phosphatase 2A 57 kDa regulatory subunit B&apos; beta isoform	KOG2085: Serine/threonine protein phosphatase 2A, regulatory subunit	GO:0000159: protein phosphatase type 2A complex; GO:0007165: signal transduction; GO:0019888: protein phosphatase regulator activity	IPR002554: Protein phosphatase 2A, regulatory B subunit, B56; IPR011989: Armadillo-like helical; IPR016024: Armadillo-type fold	K11584: PPP2R5;serine/threonine-protein phosphatase 2A regulatory subunit B'
Npp.01A011260.1	glycine-rich RNA-binding protein RZ1C-like isoform X1	Glycine-rich RNA-binding protein RZ1C	Glycine-rich RNA-binding protein RZ1C	-	GO:0003676: nucleic acid binding; GO:0008270: zinc ion binding	IPR000504: RNA recognition motif domain; IPR001878: Zinc finger, CCHC-type; IPR012677: Nucleotide-binding alpha-beta plait domain superfamily; IPR035979: RNA-binding domain superfamily; IPR036875: Zinc finger, CCHC-type superfamily	K12885: RBMX,HNRNPG;heterogeneous nuclear ribonucleoprotein G
Npp.01A011270.1	flavonol 4-sulfotransferase	Cytosolic sulfotransferase 18	Cytosolic sulfotransferase 18	KOG1584: Sulfotransferase	GO:0008146: sulfotransferase activity	IPR000863: Sulfotransferase domain; IPR027417: P-loop containing nucleoside triphosphate hydrolase	-
Npp.01A011280.1	protein NUCLEAR FUSION DEFECTIVE 4-like	-	-	-	-	IPR010658: Nodulin-like; IPR036259: MFS transporter superfamily	-
Npp.01A011290.1	hypothetical protein C2845_PM10G18540	-	-	-	-	IPR026960: Reverse transcriptase zinc-binding domain	-
Npp.01A011300.1	protein argonaute 12; hypothetical protein GQ55_9G131000	Protein argonaute 12	Protein argonaute 12	-	-	-	K11593: ELF2C,AGO;eukaryotic translation initiation factor 2C
Npp.01A011310.1	protein argonaute 12; hypothetical protein SORBI_3001G136000	Protein argonaute 12	Protein argonaute 12	-	GO:0003676: nucleic acid binding; GO:0005515: protein binding	IPR003100: PAZ domain; IPR003165: Piwi domain; IPR012337: Ribonuclease H-like superfamily; IPR014811: Argonaute, linker 1 domain; IPR032472: Argonaute linker 2 domain; IPR036085: PAZ domain superfamily; IPR036397: Ribonuclease H superfamily	-
Npp.01A011320.1	agmatine coumaroyltransferase-2	Agmatine coumaroyltransferase-2	Agmatine coumaroyltransferase-2	-	GO:0016747: transferase activity, transferring acyl groups other than amino-acyl groups	IPR003480: Transferase; IPR023213: Chloramphenicol acetyltransferase-like domain superfamily	-
Npp.01A011330.1	receptor-like protein EIX1; hypothetical protein SETIT_4G233400v2	Receptor-like protein EIX1	Receptor-like protein EIX1	-	-	IPR013210: Leucine-rich repeat-containing N-terminal, plant-type; IPR032675: Leucine-rich repeat domain superfamily	-
Npp.01A011340.1	GDSL esterase/lipase At3g53100	GDSL esterase/lipase At5g03810	GDSL esterase/lipase At5g03810	-	-	-	-
Npp.01A011350.1	E3 ubiquitin-protein ligase UPL7	E3 ubiquitin-protein ligase UPL7	E3 ubiquitin-protein ligase UPL7	KOG0942: E3 ubiquitin protein ligase; KOG4427: E3 ubiquitin protein ligase	GO:0004842: ubiquitin-protein transferase activity	IPR000569: HECT domain; IPR035983: HECT, E3 ligase catalytic domain	K10588: UBE3B;ubiquitin-protein ligase E3 B [EC:2.3.2.26]
Npp.01A011360.1	GATA transcription factor 18	GATA transcription factor 18	GATA transcription factor 18	-	GO:0005515: protein binding; GO:0006355: regulation of transcription, DNA-templated; GO:0008270: zinc ion binding; GO:0043565: sequence-specific DNA binding	IPR000679: Zinc finger, GATA-type; IPR010399: Tify domain; IPR010402: CCT domain; IPR013088: Zinc finger, NHR/GATA-type	-
Npp.01A011370.1	uncharacterized protein LOC8054166; hypothetical protein Zm00014a_022015	Protein saal1	Protein saal1	-	-	IPR011989: Armadillo-like helical; IPR016024: Armadillo-type fold	-
Npp.01A011380.1	uncharacterized protein LOC100382562; hypothetical protein Zm00014a_022020	-	-	-	-	IPR032245: RecQ-mediated genome instability protein 2	K15365: RMI2;RecQ-mediated genome instability protein 2
Npp.01A011390.1	magnesium transporter MRS2-A, chloroplastic	Magnesium transporter MRS2-A, chloroplastic	Magnesium transporter MRS2-A, chloroplastic	KOG2662: Magnesium transporters: CorA family	-	IPR039204: Magnesium transporter MRS2-like	K16075: MRS2,MFM1;magnesium transporter
Npp.01A011400.1	hypothetical protein SORBI_3001G133200; uncharacterized protein LOC8077630 isoform X1	-	-	-	GO:0005515: protein binding	IPR001810: F-box domain; IPR036047: F-box-like domain superfamily	-
Npp.01A011410.1	glycine-rich RNA-binding protein RZ1C-like isoform X1	Glycine-rich RNA-binding protein RZ1C	Glycine-rich RNA-binding protein RZ1C	-	GO:0003676: nucleic acid binding; GO:0008270: zinc ion binding	IPR000504: RNA recognition motif domain; IPR001878: Zinc finger, CCHC-type; IPR012677: Nucleotide-binding alpha-beta plait domain superfamily; IPR035979: RNA-binding domain superfamily; IPR036875: Zinc finger, CCHC-type superfamily	K12885: RBMX,HNRNPG;heterogeneous nuclear ribonucleoprotein G
Npp.01A011420.1	serine/threonine protein phosphatase 2A 57 kDa regulatory subunit B&apos; alpha isoform-like isoform X1	Serine/threonine protein phosphatase 2A 57 kDa regulatory subunit B&apos; beta isoform	Serine/threonine protein phosphatase 2A 57 kDa regulatory subunit B&apos; beta isoform	KOG2085: Serine/threonine protein phosphatase 2A, regulatory subunit	GO:0000159: protein phosphatase type 2A complex; GO:0007165: signal transduction; GO:0019888: protein phosphatase regulator activity	IPR002554: Protein phosphatase 2A, regulatory B subunit, B56; IPR011989: Armadillo-like helical; IPR016024: Armadillo-type fold	K11584: PPP2R5;serine/threonine-protein phosphatase 2A regulatory subunit B'
Npp.01A011430.1	hypothetical protein SORBI_3005G226500; Osmotin-like protein	-	-	-	-	IPR001938: Thaumatin family; IPR037176: Osmotin/thaumatin-like superfamily	-
Npp.01A011440.1	-	-	-	-	-	IPR019443: FMP27, C-terminal	-
Npp.01A011450.1	probable ubiquitin-conjugating enzyme E2 18	Probable ubiquitin-conjugating enzyme E2 18	Probable ubiquitin-conjugating enzyme E2 18	KOG0427: Ubiquitin conjugating enzyme	-	IPR000608: Ubiquitin-conjugating enzyme E2; IPR016135: Ubiquitin-conjugating enzyme/RWD-like	K10688: UBE2W,UBC16;ubiquitin-conjugating enzyme E2 W [EC:2.3.2.25]
Npp.01A011460.1	probable galacturonosyltransferase-like 1	Probable galacturonosyltransferase-like 1; Glycosyltransferase 8 domain-containing protein 1	Probable galacturonosyltransferase-like 1; Glycosyltransferase 8 domain-containing protein 1	-	GO:0016757: transferase activity, transferring glycosyl groups	IPR002495: Glycosyl transferase, family 8; IPR029044: Nucleotide-diphospho-sugar transferases	K20893: PARVUS,GLZ1,GATL1;probable galacturonosyltransferase-like 1 [EC:2.4.1.-]
Npp.01A011470.1	flavonol 4-sulfotransferase	Cytosolic sulfotransferase 18	Cytosolic sulfotransferase 18	KOG1584: Sulfotransferase	GO:0008146: sulfotransferase activity	IPR000863: Sulfotransferase domain; IPR027417: P-loop containing nucleoside triphosphate hydrolase	-
Npp.01A011490.1	glycine-rich RNA-binding protein RZ1C isoform X1	Glycine-rich RNA-binding protein RZ1C	Glycine-rich RNA-binding protein RZ1C	-	-	-	K12885: RBMX,HNRNPG;heterogeneous nuclear ribonucleoprotein G
Npp.01A011500.1	serine/threonine protein phosphatase 2A 57 kDa regulatory subunit B&apos; alpha isoform-like isoform X1	Serine/threonine protein phosphatase 2A 57 kDa regulatory subunit B&apos; beta isoform	Serine/threonine protein phosphatase 2A 57 kDa regulatory subunit B&apos; beta isoform	KOG2085: Serine/threonine protein phosphatase 2A, regulatory subunit	GO:0000159: protein phosphatase type 2A complex; GO:0007165: signal transduction; GO:0019888: protein phosphatase regulator activity	IPR002554: Protein phosphatase 2A, regulatory B subunit, B56; IPR011989: Armadillo-like helical; IPR016024: Armadillo-type fold	K11584: PPP2R5;serine/threonine-protein phosphatase 2A regulatory subunit B'
Npp.01A011510.1	dual specificity protein phosphatase 1B	Dual specificity protein phosphatase 1	Dual specificity protein phosphatase 1	KOG1717: Dual specificity phosphatase	GO:0006470: protein dephosphorylation; GO:0008138: protein tyrosine/serine/threonine phosphatase activity	IPR000340: Dual specificity phosphatase, catalytic domain; IPR000387: Tyrosine specific protein phosphatases domain; IPR020422: Dual specificity protein phosphatase domain; IPR029021: Protein-tyrosine phosphatase-like	-
Npp.01A011520.1	probable ubiquitin-conjugating enzyme E2 18	Probable ubiquitin-conjugating enzyme E2 18	Probable ubiquitin-conjugating enzyme E2 18	KOG0427: Ubiquitin conjugating enzyme	-	-	K10688: UBE2W,UBC16;ubiquitin-conjugating enzyme E2 W [EC:2.3.2.25]
Npp.01A011530.1	-	-	-	-	-	IPR019443: FMP27, C-terminal	-
Npp.01A011540.1	Osmotin-like protein	Osmotin-like protein	Osmotin-like protein	-	-	-	-
Npp.01A011550.1	-	-	-	-	-	IPR019443: FMP27, C-terminal	-
Npp.01A011560.1	protein SABRE isoform X3; Golgi-body localization protein domain	Protein SABRE	Protein SABRE	-	-	IPR019441: FMP27, GFWDK domain; IPR019443: FMP27, C-terminal	-
Npp.01A011590.1	BEL1-like homeodomain protein 7	BEL1-like homeodomain protein 7	BEL1-like homeodomain protein 7	-	GO:0003677: DNA binding; GO:0006355: regulation of transcription, DNA-templated	IPR001356: Homeobox domain; IPR006563: POX domain; IPR008422: Homeobox KN domain; IPR009057: Homeobox-like domain superfamily	-
Npp.01A011600.1	BEL1-like homeodomain protein 11	BEL1-like homeodomain protein 11	BEL1-like homeodomain protein 11	-	GO:0003677: DNA binding; GO:0006355: regulation of transcription, DNA-templated	IPR001356: Homeobox domain; IPR006563: POX domain; IPR008422: Homeobox KN domain; IPR009057: Homeobox-like domain superfamily	-
Npp.01A011630.1	GATA transcription factor 26; hypothetical protein SETIT_2G158000v2	GATA transcription factor 26	GATA transcription factor 26	-	GO:0006355: regulation of transcription, DNA-templated; GO:0008270: zinc ion binding; GO:0043565: sequence-specific DNA binding	IPR000679: Zinc finger, GATA-type; IPR013088: Zinc finger, NHR/GATA-type; IPR028020: ASX homology domain	-
Npp.01A011640.1	hypothetical protein BAE44_0017234, partial; ankyrin-1	-	-	-	GO:0005515: protein binding	IPR002110: Ankyrin repeat; IPR011990: Tetratricopeptide-like helical domain superfamily; IPR013026: Tetratricopeptide repeat-containing domain; IPR020683: Ankyrin repeat-containing domain; IPR036770: Ankyrin repeat-containing domain superfamily	-
Npp.01A011650.1	ankyrin repeat and protein kinase domain-containing protein 1-like isoform X2	Small glutamine-rich tetratricopeptide repeat-containing protein 2	Small glutamine-rich tetratricopeptide repeat-containing protein 2	KOG0548: Molecular co-chaperone STI1	GO:0005515: protein binding	IPR002110: Ankyrin repeat; IPR011990: Tetratricopeptide-like helical domain superfamily; IPR013026: Tetratricopeptide repeat-containing domain; IPR013105: Tetratricopeptide repeat 2; IPR019734: Tetratricopeptide repeat; IPR020683: Ankyrin repeat-containing domain; IPR036770: Ankyrin repeat-containing domain superfamily	-
Npp.01A011660.1	U4/U6 small nuclear ribonucleoprotein Prp31 homolog	-	-	-	GO:0000244: spliceosomal tri-snRNP complex assembly; GO:0000398: mRNA splicing, via spliceosome; GO:0046540: U4/U6 x U5 tri-snRNP complex	IPR002687: Nop domain; IPR027105: U4/U6 small nuclear ribonucleoprotein Prp31; IPR036070: Nop domain superfamily; IPR042239: Nop, C-terminal domain	-
Npp.01A011670.1	hypothetical protein SETIT_9G139900v2	-	-	-	GO:0005515: protein binding	IPR002110: Ankyrin repeat; IPR011990: Tetratricopeptide-like helical domain superfamily; IPR013026: Tetratricopeptide repeat-containing domain; IPR020683: Ankyrin repeat-containing domain; IPR036770: Ankyrin repeat-containing domain superfamily	-
Npp.01A011680.1	hypothetical protein SETIT_9G217900v2	-	-	-	GO:0017148: negative regulation of translation; GO:0030598: rRNA N-glycosylase activity	IPR001574: Ribosome-inactivating protein; IPR016138: Ribosome-inactivating protein, subdomain 1; IPR036041: Ribosome-inactivating protein superfamily	-
Npp.01A011690.1	hypothetical protein SETIT_7G303200v2	-	-	-	-	-	-
Npp.01A011700.1	hypothetical protein SETIT_9G217800v2; uncharacterized protein LOC105915122	-	-	-	GO:0005515: protein binding	IPR036047: F-box-like domain superfamily	-
Npp.01A011710.1	hypothetical protein SETIT_9G139900v2	Heat shock protein sti1 homolog; Stress-induced-phosphoprotein 1; Serine/threonine-protein phosphatase 5	Heat shock protein sti1 homolog; Stress-induced-phosphoprotein 1; Serine/threonine-protein phosphatase 5	KOG0548: Molecular co-chaperone STI1	GO:0005515: protein binding	IPR001440: Tetratricopeptide repeat 1; IPR002110: Ankyrin repeat; IPR011990: Tetratricopeptide-like helical domain superfamily; IPR013026: Tetratricopeptide repeat-containing domain; IPR019734: Tetratricopeptide repeat; IPR020683: Ankyrin repeat-containing domain; IPR036770: Ankyrin repeat-containing domain superfamily	K09553: STIP1;stress-induced-phosphoprotein 1
Npp.01A011720.1	cytochrome P450 89A2; LOW QUALITY PROTEIN: hypothetical protein SETIT_7G015600v2	-	-	-	GO:0005506: iron ion binding; GO:0016705: oxidoreductase activity, acting on paired donors, with incorporation or reduction of molecular oxygen; GO:0020037: heme binding; GO:0055114: oxidation-reduction process	IPR036396: Cytochrome P450 superfamily	-
Npp.01A011730.1	cytochrome P450 89A2	Cytochrome P450 89A2	Cytochrome P450 89A2	-	GO:0005506: iron ion binding; GO:0016705: oxidoreductase activity, acting on paired donors, with incorporation or reduction of molecular oxygen; GO:0020037: heme binding; GO:0055114: oxidation-reduction process	IPR001128: Cytochrome P450; IPR002401: Cytochrome P450, E-class, group I; IPR036396: Cytochrome P450 superfamily	-
Npp.01A011740.1	phosphomethylpyrimidine synthase, chloroplastic	Phosphomethylpyrimidine synthase, chloroplastic	Phosphomethylpyrimidine synthase, chloroplastic	-	GO:0009228: thiamine biosynthetic process; GO:0016830: carbon-carbon lyase activity; GO:0051536: iron-sulfur cluster binding	IPR002817: Phosphomethylpyrimidine synthase ThiC/5-hydroxybenzimidazole synthase BzaA/B; IPR037509: Phosphomethylpyrimidine synthase; IPR038521: ThiC/Bza superfamily	K03147: thiC;phosphomethylpyrimidine synthase [EC:4.1.99.17]
Npp.01A011750.1	probable galacturonosyltransferase-like 1	Probable galacturonosyltransferase-like 1; Glycosyltransferase 8 domain-containing protein 1	Probable galacturonosyltransferase-like 1; Glycosyltransferase 8 domain-containing protein 1	-	GO:0016757: transferase activity, transferring glycosyl groups	IPR002495: Glycosyl transferase, family 8; IPR029044: Nucleotide-diphospho-sugar transferases	K20893: PARVUS,GLZ1,GATL1;probable galacturonosyltransferase-like 1 [EC:2.4.1.-]
Npp.01A011760.1	E3 ubiquitin-protein ligase RNF5; putative RING zinc finger domain superfamily protein	E3 ubiquitin ligase rnf-5	E3 ubiquitin ligase rnf-5	KOG0823: Predicted E3 ubiquitin ligase	-	IPR001841: Zinc finger, RING-type; IPR013083: Zinc finger, RING/FYVE/PHD-type; IPR017907: Zinc finger, RING-type, conserved site	K10666: RNF5;E3 ubiquitin-protein ligase RNF5 [EC:2.3.2.27]
Npp.01A011770.1	crooked neck-like protein 1	Pre-mRNA-splicing factor CLF1	Pre-mRNA-splicing factor CLF1	KOG1915: Cell cycle control protein (crooked neck)	GO:0005515: protein binding; GO:0006396: RNA processing	IPR003107: HAT (Half-A-TPR) repeat; IPR011990: Tetratricopeptide-like helical domain superfamily; IPR013026: Tetratricopeptide repeat-containing domain	K12869: CRN,CRNKL1,CLF1,SYF3;crooked neck
Npp.01A011780.1	uncharacterized protein LOC110435878	-	-	-	-	IPR005162: Retrotransposon gag domain	-
Npp.01A011790.1	thymocyte nuclear protein 1; hypothetical protein SORBI_3001G138900	Thymocyte nuclear protein 1	Thymocyte nuclear protein 1	KOG3383: Uncharacterized conserved protein	-	IPR002740: EVE domain; IPR015947: PUA-like superfamily	-
Npp.01A011800.1	hypothetical protein SORBI_3001G139200, partial; ocs element-binding factor 1	-	-	-	GO:0003700: DNA binding transcription factor activity; GO:0006355: regulation of transcription, DNA-templated	IPR004827: Basic-leucine zipper domain	-
Npp.01A011810.1	uncharacterized protein LOC8056726; hypothetical protein GQ55_9G133500	-	-	-	-	-	-
Npp.01A011820.1	hypothetical protein SORBI_3003G232332	-	-	-	GO:0003676: nucleic acid binding; GO:0008270: zinc ion binding	IPR001878: Zinc finger, CCHC-type; IPR036875: Zinc finger, CCHC-type superfamily	-
Npp.01A011830.1	uncharacterized protein LOC100277915	-	-	-	-	-	-
Npp.01A011840.1	-	-	-	-	GO:0003676: nucleic acid binding; GO:0015074: DNA integration	IPR001584: Integrase, catalytic core; IPR012337: Ribonuclease H-like superfamily; IPR036397: Ribonuclease H superfamily	-
Npp.01A011850.1	uncharacterized protein LOC100277915; hypothetical protein Zm00014a_032992	-	-	-	-	-	-
Npp.01A011870.1	growth-regulating factor 9	Growth-regulating factor 9	Growth-regulating factor 9	-	GO:0005524: ATP binding; GO:0005634: nucleus; GO:0006351: transcription, DNA-templated; GO:0006355: regulation of transcription, DNA-templated; GO:0032502: developmental process	IPR014977: WRC domain; IPR014978: Glutamine-Leucine-Glutamine, QLQ; IPR031137: Growth-regulating factor	-
Npp.01A011880.1	CBS domain containing protein	Metal transporter CNNM4; DUF21 domain-containing protein At2g14520	Metal transporter CNNM4; DUF21 domain-containing protein At2g14520	KOG2118: Predicted membrane protein, contains two CBS domains	-	IPR000644: CBS domain; IPR002550: CNNM, transmembrane domain	K16302: CNNM;metal transporter CNNM
Npp.01A011890.1	UDP-sulfoquinovose synthase, chloroplastic	UDP-glucose 4-epimerase	UDP-glucose 4-epimerase	-	GO:0003824: catalytic activity	IPR001509: NAD-dependent epimerase/dehydratase; IPR036291: NAD(P)-binding domain superfamily	K06118: SQD1,sqdB;UDP-sulfoquinovose synthase [EC:3.13.1.1]
Npp.01A011900.1	CSC1-like protein RXW8	CSC1-like protein RXW8	CSC1-like protein RXW8	KOG1134: Uncharacterized conserved protein	GO:0016020: membrane	IPR003864: Calcium-dependent channel, 7TM region, putative phosphate; IPR027815: 10TM putative phosphate transporter, cytosolic domain; IPR032880: Calcium permeable stress-gated cation channel 1, N-terminal transmembrane domain	K21989: TMEM63;calcium permeable stress-gated cation channel
Npp.01A011910.1	hypothetical protein	-	-	-	-	-	-
Npp.01A011920.1	hypothetical protein ZEAMMB73_Zm00001d010854; uncharacterized protein LOC103635891 isoform X2	-	-	-	-	-	-
Npp.01A011940.1	uncharacterized protein LOC103637274; conserved hypothetical protein	-	-	-	-	-	-
Npp.01A011950.1	uncharacterized protein LOC112887116; hypothetical protein GQ55_3G082000	-	-	-	-	-	-
Npp.01A011960.1	homeobox protein knotted-1-like 4	Homeobox protein knotted-1-like 4	Homeobox protein knotted-1-like 4	-	GO:0000981: RNA polymerase II transcription factor activity, sequence-specific DNA binding; GO:0003677: DNA binding; GO:0005634: nucleus; GO:0006355: regulation of transcription, DNA-templated	IPR001356: Homeobox domain; IPR005539: ELK domain; IPR005540: KNOX1; IPR005541: KNOX2; IPR008422: Homeobox KN domain; IPR009057: Homeobox-like domain superfamily; IPR017970: Homeobox, conserved site	-
Npp.01A011970.1	uncharacterized protein LOC103625996	Endo-1,4-beta-xylanase 1	Endo-1,4-beta-xylanase 1	-	GO:0004553: hydrolase activity, hydrolyzing O-glycosyl compounds; GO:0005975: carbohydrate metabolic process	IPR001000: Glycoside hydrolase family 10 domain; IPR003305: Carbohydrate-binding, CenC-like; IPR008979: Galactose-binding-like domain superfamily; IPR017853: Glycoside hydrolase superfamily	-
Npp.01A011980.1	disease resistance protein RGA5-like; hypothetical protein OsI_19026	Disease resistance protein RGA5	Disease resistance protein RGA5	-	GO:0043531: ADP binding	IPR002182: NB-ARC; IPR027417: P-loop containing nucleoside triphosphate hydrolase; IPR038005: Virus X resistance protein-like, coiled-coil domain; IPR041118: Rx, N-terminal	-
Npp.01A012000.1	uncharacterized protein LOC8056730; hypothetical protein GQ55_9G135200	-	-	-	-	-	-
Npp.01A012010.1	Pyruvate kinase	Pyruvate kinase isozyme A, chloroplastic	Pyruvate kinase isozyme A, chloroplastic	-	GO:0000287: magnesium ion binding; GO:0004743: pyruvate kinase activity; GO:0006096: glycolytic process; GO:0030955: potassium ion binding	IPR001697: Pyruvate kinase; IPR011037: Pyruvate kinase-like, insert domain superfamily; IPR015793: Pyruvate kinase, barrel; IPR015806: Pyruvate kinase, insert domain superfamily; IPR015813: Pyruvate/Phosphoenolpyruvate kinase-like domain superfamily; IPR040442: Pyruvate kinase-like domain superfamily	-
Npp.01A012020.1	sugar transporter SWEET15	Bidirectional sugar transporter SWEET15	Bidirectional sugar transporter SWEET15	KOG1623: Multitransmembrane protein	GO:0016021: integral component of membrane	IPR004316: SWEET sugar transporter	K15382: SLC50A,SWEET;solute carrier family 50 (sugar transporter)
Npp.01A012030.1	serine/threonine-protein kinase PBS1	Serine/threonine-protein kinase PBS1	Serine/threonine-protein kinase PBS1	-	GO:0004672: protein kinase activity; GO:0005524: ATP binding; GO:0006468: protein phosphorylation	IPR000719: Protein kinase domain; IPR008271: Serine/threonine-protein kinase, active site; IPR011009: Protein kinase-like domain superfamily; IPR017441: Protein kinase, ATP binding site	K13430: PBS1;serine/threonine-protein kinase PBS1 [EC:2.7.11.1]
Npp.01A012050.1	hypothetical protein ZEAMMB73_Zm00001d046598; uncharacterized protein LOC103635891 isoform X1	-	-	-	-	-	-
Npp.01A012070.1	-	-	-	-	GO:0003676: nucleic acid binding; GO:0008270: zinc ion binding	IPR001878: Zinc finger, CCHC-type; IPR036875: Zinc finger, CCHC-type superfamily	-
Npp.01A012080.1	homeobox protein knotted-1-like 4	Homeobox protein knotted-1-like 4	Homeobox protein knotted-1-like 4	-	GO:0000981: RNA polymerase II transcription factor activity, sequence-specific DNA binding; GO:0003677: DNA binding; GO:0005634: nucleus; GO:0006355: regulation of transcription, DNA-templated	IPR001356: Homeobox domain; IPR005539: ELK domain; IPR005540: KNOX1; IPR005541: KNOX2; IPR008422: Homeobox KN domain; IPR009057: Homeobox-like domain superfamily; IPR017970: Homeobox, conserved site	-
Npp.01A012090.1	uncharacterized protein LOC103625996	Endo-1,4-beta-xylanase 1	Endo-1,4-beta-xylanase 1	-	GO:0004553: hydrolase activity, hydrolyzing O-glycosyl compounds; GO:0005975: carbohydrate metabolic process	IPR001000: Glycoside hydrolase family 10 domain; IPR003305: Carbohydrate-binding, CenC-like; IPR008979: Galactose-binding-like domain superfamily; IPR017853: Glycoside hydrolase superfamily	-
Npp.01A012110.1	disease resistance protein RGA5-like; hypothetical protein OsI_19026	Disease resistance protein PIK6-NP	Disease resistance protein PIK6-NP	-	GO:0043531: ADP binding	IPR002182: NB-ARC; IPR027417: P-loop containing nucleoside triphosphate hydrolase; IPR038005: Virus X resistance protein-like, coiled-coil domain; IPR041118: Rx, N-terminal	-
Npp.01A012120.1	uncharacterized protein LOC8056730; hypothetical protein GQ55_9G135200	-	-	-	-	-	-
Npp.01A012130.1	pyruvate kinase isozyme A, chloroplastic	Plastidial pyruvate kinase 1, chloroplastic	Plastidial pyruvate kinase 1, chloroplastic	KOG2323: Pyruvate kinase	GO:0000287: magnesium ion binding; GO:0004743: pyruvate kinase activity; GO:0006096: glycolytic process; GO:0030955: potassium ion binding	IPR001697: Pyruvate kinase; IPR011037: Pyruvate kinase-like, insert domain superfamily; IPR015793: Pyruvate kinase, barrel; IPR015795: Pyruvate kinase, C-terminal; IPR015806: Pyruvate kinase, insert domain superfamily; IPR015813: Pyruvate/Phosphoenolpyruvate kinase-like domain superfamily; IPR036918: Pyruvate kinase, C-terminal domain superfamily; IPR040442: Pyruvate kinase-like domain superfamily	K00873: PK,pyk;pyruvate kinase [EC:2.7.1.40]
Npp.01A012140.1	transcription factor NAI1	Transcription factor bHLH25	Transcription factor bHLH25	-	GO:0046983: protein dimerization activity	IPR011598: Myc-type, basic helix-loop-helix (bHLH) domain; IPR036638: Helix-loop-helix DNA-binding domain superfamily	-
Npp.01A012150.1	Zinc knuckle family protein	-	-	-	GO:0003676: nucleic acid binding; GO:0008270: zinc ion binding	IPR001878: Zinc finger, CCHC-type; IPR036875: Zinc finger, CCHC-type superfamily	-
Npp.01A012160.1	hypothetical protein	-	-	-	-	-	-
Npp.01A012170.1	hypothetical protein BAE44_0007409	-	-	-	-	-	-
Npp.01A012180.1	CSC1-like protein RXW8	CSC1-like protein RXW8	CSC1-like protein RXW8	KOG1134: Uncharacterized conserved protein	GO:0016020: membrane	IPR003864: Calcium-dependent channel, 7TM region, putative phosphate; IPR027815: 10TM putative phosphate transporter, cytosolic domain; IPR032880: Calcium permeable stress-gated cation channel 1, N-terminal transmembrane domain	K21989: TMEM63;calcium permeable stress-gated cation channel
Npp.01A012190.1	Zinc knuckle family protein	-	-	-	GO:0003676: nucleic acid binding; GO:0008270: zinc ion binding	IPR001878: Zinc finger, CCHC-type; IPR036875: Zinc finger, CCHC-type superfamily	-
Npp.01A012200.1	-	-	-	-	GO:0003676: nucleic acid binding	IPR012337: Ribonuclease H-like superfamily; IPR036397: Ribonuclease H superfamily	-
Npp.01A012210.1	transcription factor bHLH18	Transcription factor bHLH25	Transcription factor bHLH25	-	GO:0046983: protein dimerization activity	IPR011598: Myc-type, basic helix-loop-helix (bHLH) domain; IPR036638: Helix-loop-helix DNA-binding domain superfamily	-
Npp.01A012220.1	Fe(2+) transport protein 1	Fe(2+) transport protein 2	Fe(2+) transport protein 2	-	GO:0005385: zinc ion transmembrane transporter activity; GO:0016020: membrane; GO:0016021: integral component of membrane; GO:0071577: zinc ion transmembrane transport	IPR003689: Zinc/iron permease; IPR004698: Zinc/iron permease, fungal/plant	K14709: SLC39A1_2_3,ZIP1_2_3;solute carrier family 39 (zinc transporter),member 1/2/3
Npp.01A012230.1	uncharacterized protein LOC100382143; hypothetical protein Zm00014a_015186	-	-	-	-	-	-
Npp.01A012240.1	uncharacterized protein LOC8056463; hypothetical protein SORBI_3001G142501	-	-	-	GO:0005515: protein binding	IPR001810: F-box domain; IPR036047: F-box-like domain superfamily	-
Npp.01A012250.1	hypothetical protein SORBI_3001G142501; uncharacterized protein LOC8056463	-	-	-	GO:0005515: protein binding	IPR001810: F-box domain; IPR036047: F-box-like domain superfamily	-
Npp.01A012260.1	hypothetical protein OsJ_35851	-	-	-	GO:0003676: nucleic acid binding; GO:0004523: RNA-DNA hybrid ribonuclease activity	IPR002156: Ribonuclease H domain; IPR012337: Ribonuclease H-like superfamily; IPR025558: Domain of unknown function DUF4283; IPR025836: Zinc knuckle CX2CX4HX4C; IPR036397: Ribonuclease H superfamily; IPR040256: Uncharacterized protein At4g02000-like	-
Npp.01A012270.1	hypothetical protein SORBI_3001G142501; uncharacterized protein LOC4333673 isoform X1	-	-	-	GO:0005515: protein binding	IPR001810: F-box domain; IPR036047: F-box-like domain superfamily	-
Npp.01A012280.1	putative cyclin-dependent kinase F-2	Putative cyclin-dependent kinase F-2	Putative cyclin-dependent kinase F-2	-	GO:0004672: protein kinase activity; GO:0005524: ATP binding; GO:0006468: protein phosphorylation	IPR000719: Protein kinase domain; IPR008271: Serine/threonine-protein kinase, active site; IPR011009: Protein kinase-like domain superfamily; IPR017441: Protein kinase, ATP binding site	-
Npp.01A012290.1	glucan endo-1,3-beta-glucosidase 7 isoform X1	Glucan endo-1,3-beta-glucosidase 7	Glucan endo-1,3-beta-glucosidase 7	-	GO:0004553: hydrolase activity, hydrolyzing O-glycosyl compounds; GO:0005975: carbohydrate metabolic process	IPR000490: Glycoside hydrolase family 17; IPR012946: X8 domain; IPR017853: Glycoside hydrolase superfamily	-
Npp.01A012300.1	guanine nucleotide-binding protein subunit beta	Guanine nucleotide-binding protein subunit beta	Guanine nucleotide-binding protein subunit beta	KOG0286: G-protein beta subunit	GO:0005515: protein binding; GO:0007165: signal transduction	IPR001632: G-protein, beta subunit; IPR001680: WD40 repeat; IPR015943: WD40/YVTN repeat-like-containing domain superfamily; IPR016346: Guanine nucleotide-binding protein, beta subunit; IPR017986: WD40-repeat-containing domain; IPR019775: WD40 repeat, conserved site; IPR020472: G-protein beta WD-40 repeat; IPR036322: WD40-repeat-containing domain superfamily	K04536: GNB1;guanine nucleotide-binding protein G(I)/G(S)/G(T) subunit beta-1
Npp.01A012310.1	Deoxyuridine 5&apos;-triphosphate nucleotidohydrolase; hypothetical protein C2845_PM02G03080	Deoxyuridine 5&apos;-triphosphate nucleotidohydrolase	Deoxyuridine 5&apos;-triphosphate nucleotidohydrolase	KOG3370: dUTPase	GO:0000287: magnesium ion binding; GO:0004170: dUTP diphosphatase activity; GO:0006226: dUMP biosynthetic process; GO:0046081: dUTP catabolic process	IPR008181: Deoxyuridine triphosphate nucleotidohydrolase; IPR029054: dUTPase-like; IPR033704: dUTPase, trimeric; IPR036157: dUTPase-like superfamily	K01520: dut,DUT;dUTP pyrophosphatase [EC:3.6.1.23]
Npp.01A012320.1	putative receptor-like protein kinase At4g00960	Cysteine-rich receptor-like protein kinase 6	Cysteine-rich receptor-like protein kinase 6	-	GO:0004672: protein kinase activity; GO:0005524: ATP binding; GO:0006468: protein phosphorylation	IPR000719: Protein kinase domain; IPR002902: Gnk2-homologous domain; IPR008271: Serine/threonine-protein kinase, active site; IPR011009: Protein kinase-like domain superfamily; IPR017441: Protein kinase, ATP binding site; IPR038408: Gnk2-homologous domain superfamily	-
Npp.01A012330.1	putative receptor-like protein kinase At4g00960	Cysteine-rich receptor-like protein kinase 6	Cysteine-rich receptor-like protein kinase 6	-	GO:0004672: protein kinase activity; GO:0005524: ATP binding; GO:0006468: protein phosphorylation	IPR000719: Protein kinase domain; IPR002902: Gnk2-homologous domain; IPR008271: Serine/threonine-protein kinase, active site; IPR011009: Protein kinase-like domain superfamily; IPR017441: Protein kinase, ATP binding site; IPR038408: Gnk2-homologous domain superfamily	-
Npp.01A012350.1	putative BOI-related E3 ubiquitin-protein ligase 3	Probable BOI-related E3 ubiquitin-protein ligase 2	Probable BOI-related E3 ubiquitin-protein ligase 2	-	-	IPR001841: Zinc finger, RING-type; IPR013083: Zinc finger, RING/FYVE/PHD-type; IPR017066: E3 ubiquitin-protein ligase BOI-like	K19042: BOI;E3 ubiquitin-protein ligase BOI and related proteins [EC:2.3.2.27]
Npp.01A012380.1	protein ROOT PRIMORDIUM DEFECTIVE 1	Protein WHAT&apos;S THIS FACTOR 1 homolog, chloroplastic	Protein WHAT&apos;S THIS FACTOR 1 homolog, chloroplastic	-	-	IPR021099: Plant organelle RNA recognition domain	-
Npp.01A012400.1	ADP-ribosylation factor-like protein 2 isoform X2	ADP-ribosylation factor-like protein 2	ADP-ribosylation factor-like protein 2	KOG0073: GTP-binding ADP-ribosylation factor-like protein ARL2; KOG0074: GTP-binding ADP-ribosylation factor-like protein ARL3	GO:0005525: GTP binding	IPR005225: Small GTP-binding protein domain; IPR006689: Small GTPase superfamily, ARF/SAR type; IPR027417: P-loop containing nucleoside triphosphate hydrolase	K07943: ARL2;ADP-ribosylation factor-like protein 2
Npp.01A012410.1	uncharacterized protein LOC8056751 isoform X1	-	-	-	-	IPR011989: Armadillo-like helical; IPR016024: Armadillo-type fold	-
Npp.01A012420.1	uncharacterized protein LOC8057187	-	-	-	-	IPR012876: Protein of unknown function DUF1677, plant	-
Npp.01A012430.1	protein MARD1	FCS-Like Zinc finger 8	FCS-Like Zinc finger 8	-	-	IPR007650: Zf-FLZ domain	-
Npp.01A012440.1	uncharacterized protein LOC8056752	Uncharacterized N-acetyltransferase YoaA	Uncharacterized N-acetyltransferase YoaA	-	GO:0008080: N-acetyltransferase activity	IPR000182: GNAT domain; IPR016181: Acyl-CoA N-acyltransferase	-
Npp.01A012450.1	uncharacterized protein LOC103651557	Uncharacterized N-acetyltransferase YoaA	Uncharacterized N-acetyltransferase YoaA	-	GO:0008080: N-acetyltransferase activity	IPR000182: GNAT domain; IPR016181: Acyl-CoA N-acyltransferase	-
Npp.01A012460.1	protein CDC73 homolog	Parafibromin; Cell division cycle protein 73	Parafibromin; Cell division cycle protein 73	KOG3786: RNA polymerase II assessory factor Cdc73p	GO:0006368: transcription elongation from RNA polymerase II promoter; GO:0016570: histone modification; GO:0016593: Cdc73/Paf1 complex	IPR007852: Cdc73/Parafibromin; IPR031336: Cell division control protein 73, C-terminal; IPR032041: Paf1 complex subunit Cdc73, N-terminal domain; IPR038103: Cell division control protein 73, C-terminal domain superfamily	K15175: CDC73;parafibromin
Npp.01A012470.1	non-specific lipid-transfer protein-like protein At5g64080	-	-	-	-	IPR016140: Bifunctional inhibitor/plant lipid transfer protein/seed storage helical domain; IPR036312: Bifunctional inhibitor/plant lipid transfer protein/seed storage helical domain superfamily; IPR043325: Alpha-Amylase Inhibitors (AAI), Lipid Transfer (LT) and Seed Storage (SS) Protein	-
Npp.01A012480.1	globulin-1 S allele	-	-	-	GO:0045735: nutrient reservoir activity	IPR006045: Cupin 1; IPR011051: RmlC-like cupin domain superfamily; IPR014710: RmlC-like jelly roll fold	-
Npp.01A012490.1	nuclear poly(A) polymerase 1	Nuclear poly(A) polymerase 1	Nuclear poly(A) polymerase 1	KOG2245: Poly(A) polymerase and related nucleotidyltransferases	GO:0003723: RNA binding; GO:0004652: polynucleotide adenylyltransferase activity; GO:0031123: RNA 3'-end processing; GO:0043631: RNA polyadenylation	IPR002934: Polymerase, nucleotidyl transferase domain; IPR007010: Poly(A) polymerase, RNA-binding domain; IPR007012: Poly(A) polymerase, central domain; IPR011068: Nucleotidyltransferase, class I-like, C-terminal; IPR043519: Nucleotidyltransferase superfamily	K14376: PAP;poly(A) polymerase [EC:2.7.7.19]
Npp.01A012500.1	putative cyclin-dependent kinase F-2	Putative cyclin-dependent kinase F-2	Putative cyclin-dependent kinase F-2	-	-	-	K02206: CDK2;cyclin-dependent kinase 2 [EC:2.7.11.22]
Npp.01A012510.1	type IV inositol polyphosphate 5-phosphatase 7	Type IV inositol polyphosphate 5-phosphatase 7	Type IV inositol polyphosphate 5-phosphatase 7	KOG0566: Inositol-1,4,5-triphosphate 5-phosphatase (synaptojanin), INP51/INP52/INP53 family	GO:0046856: phosphatidylinositol dephosphorylation	IPR000300: Inositol polyphosphate-related phosphatase; IPR005135: Endonuclease/exonuclease/phosphatase; IPR036691: Endonuclease/exonuclease/phosphatase superfamily	-
Npp.01A012520.1	1-aminocyclopropane-1-carboxylate synthase 7	1-aminocyclopropane-1-carboxylate synthase 7	1-aminocyclopropane-1-carboxylate synthase 7	-	GO:0003824: catalytic activity; GO:0009058: biosynthetic process; GO:0030170: pyridoxal phosphate binding	IPR004839: Aminotransferase, class I/classII; IPR015421: Pyridoxal phosphate-dependent transferase, major domain; IPR015424: Pyridoxal phosphate-dependent transferase	-
Npp.01A012530.1	threonine--tRNA ligase, mitochondrial 1	Threonine--tRNA ligase, mitochondrial 1	Threonine--tRNA ligase, mitochondrial 1	KOG1637: Threonyl-tRNA synthetase	-	-	K01868: TARS,thrS;threonyl-tRNA synthetase [EC:6.1.1.3]
Npp.01A012540.1	putative cyclin-dependent kinase F-2	Putative cyclin-dependent kinase F-2	Putative cyclin-dependent kinase F-2	-	GO:0004672: protein kinase activity; GO:0005524: ATP binding; GO:0006468: protein phosphorylation	IPR000719: Protein kinase domain; IPR008271: Serine/threonine-protein kinase, active site; IPR011009: Protein kinase-like domain superfamily; IPR017441: Protein kinase, ATP binding site	K02206: CDK2;cyclin-dependent kinase 2 [EC:2.7.11.22]
Npp.01A012550.1	trafficking protein particle complex subunit 1	Trafficking protein particle complex subunit 1	Trafficking protein particle complex subunit 1	KOG3368: Transport protein particle (TRAPP) complex subunit; KOG3369: Transport protein particle (TRAPP) complex subunit	GO:0016192: vesicle-mediated transport; GO:0030008: TRAPP complex	IPR007233: Trafficking protein particle complex subunit; IPR011012: Longin-like domain superfamily	K20300: TRAPPC1,BET5;trafficking protein particle complex subunit 1
Npp.01A012560.1	auxin-responsive protein SAUR40; hypothetical protein Zm00014a_032841	-	-	-	GO:0009733: response to auxin	IPR003676: Small auxin-up RNA	K14488: SAUR;SAUR family protein
Npp.01A012570.1	auxin-responsive protein SAUR71-like	-	-	-	GO:0009733: response to auxin	IPR003676: Small auxin-up RNA	-
Npp.01A012580.1	auxin-responsive protein SAUR71-like	Auxin-responsive protein SAUR40	Auxin-responsive protein SAUR40	-	GO:0009733: response to auxin	IPR003676: Small auxin-up RNA	-
Npp.01A012590.1	uncharacterized protein LOC8057205 isoform X2; hypothetical protein ZEAMMB73_Zm00001d013620	Membralin-like protein At1g60995	Membralin-like protein At1g60995	KOG2092: Uncharacterized conserved protein	-	IPR019144: Membralin	-
Npp.01A012600.1	uncharacterized protein At4g15545; hypothetical protein SORBI_3001G146900	-	-	-	-	-	-
Npp.01A012610.1	LOB domain-containing protein 4	LOB domain-containing protein 4	LOB domain-containing protein 4	-	-	-	-
Npp.01A012620.1	uncharacterized protein LOC8057210; hypothetical protein GQ55_9G142200	Transcription antitermination protein NusB	Transcription antitermination protein NusB	-	GO:0003723: RNA binding; GO:0006353: DNA-templated transcription, termination; GO:0006355: regulation of transcription, DNA-templated	IPR006027: NusB/RsmB/TIM44; IPR011605: NusB antitermination factor; IPR035926: NusB-like superfamily	-
Npp.01A012630.1	TATA-binding protein2	TATA-box-binding protein 2	TATA-box-binding protein 2	KOG3302: TATA-box binding protein (TBP), component of TFIID and TFIIIB	GO:0003677: DNA binding; GO:0006352: DNA-templated transcription, initiation	IPR000814: TATA-box binding protein; IPR012295: TBP domain superfamily; IPR030491: TATA-box binding protein, conserved site; IPR033710: TATA-box binding protein, eukaryotic	K03120: TBP,tbp;transcription initiation factor TFIID TATA-box-binding protein
[truncated: 113,991 more rows]
