# Supplementary material for: Genomic insights into the recent chromosome reduction and polyploidization of complex autopolyploid sugarcane S. spontaneum
Source: Research Square preprint supplement (doi:10.21203/rs.3.rs-494691/v1), 2021-05-14
Supplement: Supplementary file 6 [file 261f134c1f99dd17666e5d4f.xlsx]

## Sheet: Sheet3
NP-X GENE ID	TAIR GENE ID	KO	KO function	GO	GO function	Osativa GENE ID	KO	KO function	GO	GO function	Sbicolor GENE ID	KO	KO function	GO	GO function	Zmays GENE ID	KO	KO function	GO	GO function
Npp.01B003160.1	AT3G05940.1					LOC_Os03g61210.1					Sobic.001G028400.1.p					Zm00008a005697_P01
Npp.01B003520.1						LOC_Os03g61319.1			GO:0003677,GO:0006355	DNA binding,regulation of transcription, DNA-templated	Sobic.001G030800.1.p			GO:0003677,GO:0006355	DNA binding,regulation of transcription, DNA-templated	Zm00008a016344_P01
Npp.01B003530.1	AT1G20575.1	K00721	DPM1; dolichol-phosphate mannosyltransferase [EC:2.4.1.83]			LOC_Os03g60939.1	K00721	DPM1; dolichol-phosphate mannosyltransferase [EC:2.4.1.83]			Sobic.001G031100.1.p	K00721	DPM1; dolichol-phosphate mannosyltransferase [EC:2.4.1.83]			Zm00008a005671_P01	K00721	DPM1; dolichol-phosphate mannosyltransferase [EC:2.4.1.83]
Npp.01B003600.1	AT2G37900.1			GO:0005215,GO:0006810,GO:0016020	transporter activity,transport,membrane	LOC_Os03g60850.1			GO:0005215,GO:0006810,GO:0006857,GO:0016020	transporter activity,transport,oligopeptide transport,membrane	Sobic.001G032000.1.p			GO:0005215,GO:0006810,GO:0016020	transporter activity,transport,membrane	Zm00008a019097_P01			GO:0005215,GO:0006810,GO:0016020	transporter activity,transport,membrane
Npp.01B004540.1	AT4G23160.1			GO:0004672,GO:0005524,GO:0006468	protein kinase activity,ATP binding,protein phosphorylation											Zm00008a039257_P01			GO:0003676,GO:0008270,GO:0015074	nucleic acid binding,zinc ion binding,DNA integration
Npp.01B004650.1						LOC_Os03g61319.1			GO:0003677,GO:0006355	DNA binding,regulation of transcription, DNA-templated	Sobic.001G018700.1.p			GO:0003677,GO:0006355	DNA binding,regulation of transcription, DNA-templated	Zm00008a016344_P01
Npp.01B005030.1											Sobic.002G098300.1.p
Npp.01B008750.1	AT4G07960.1					LOC_Os07g03260.1					Sobic.001G075600.1.p					Zm00008a005334_P01
Npp.01B008760.1	AT4G37750.1	K09285	OVM, ANT; AP2-like factor, ANT lineage	GO:0003700,GO:0006355,GO:0007275	DNA-binding transcription factor activity,regulation of transcription, DNA-templated,multicellular organism development	LOC_Os03g56050.1			GO:0003700,GO:0006355	DNA-binding transcription factor activity,regulation of transcription, DNA-templated	Sobic.001G075700.1.p	K09285	OVM, ANT; AP2-like factor, ANT lineage	GO:0003700,GO:0006355,GO:0007275	DNA-binding transcription factor activity,regulation of transcription, DNA-templated,multicellular organism development	Zm00008a005333_P01	K09285	OVM, ANT; AP2-like factor, ANT lineage	GO:0003700,GO:0006355,GO:0007275	DNA-binding transcription factor activity,regulation of transcription, DNA-templated,multicellular organism development
Npp.01B009730.1	AT3G02100.1			GO:0008152,GO:0016758	metabolic process,transferase activity, transferring hexosyl groups	LOC_Os03g55050.1			GO:0008152,GO:0016758	metabolic process,transferase activity, transferring hexosyl groups	Sobic.001G084200.2.p			GO:0008152,GO:0016758	metabolic process,transferase activity, transferring hexosyl groups	Zm00008a005237_P01			GO:0008152,GO:0016758	metabolic process,transferase activity, transferring hexosyl groups
Npp.01B009740.1	AT3G02100.1			GO:0008152,GO:0016758	metabolic process,transferase activity, transferring hexosyl groups	LOC_Os03g55040.1			GO:0008152,GO:0016758	metabolic process,transferase activity, transferring hexosyl groups	Sobic.001G084300.1.p			GO:0008152,GO:0016758	metabolic process,transferase activity, transferring hexosyl groups	Zm00008a005238_P01			GO:0008152,GO:0016758	metabolic process,transferase activity, transferring hexosyl groups
Npp.01B009760.1	AT3G02100.1			GO:0008152,GO:0016758	metabolic process,transferase activity, transferring hexosyl groups	LOC_Os03g55040.1			GO:0008152,GO:0016758	metabolic process,transferase activity, transferring hexosyl groups	Sobic.001G084400.1.p			GO:0008152,GO:0016758	metabolic process,transferase activity, transferring hexosyl groups	Zm00008a005237_P01			GO:0008152,GO:0016758	metabolic process,transferase activity, transferring hexosyl groups
Npp.01B009770.1	AT3G02100.1			GO:0008152,GO:0016758	metabolic process,transferase activity, transferring hexosyl groups	LOC_Os03g55030.1			GO:0008152,GO:0016758	metabolic process,transferase activity, transferring hexosyl groups	Sobic.001G084600.1.p			GO:0008152,GO:0016758	metabolic process,transferase activity, transferring hexosyl groups	Zm00008a019373_P01			GO:0008152,GO:0016758	metabolic process,transferase activity, transferring hexosyl groups
Npp.01B009780.1	AT3G02100.1			GO:0008152,GO:0016758	metabolic process,transferase activity, transferring hexosyl groups	LOC_Os03g55010.1			GO:0008152,GO:0016758	metabolic process,transferase activity, transferring hexosyl groups	Sobic.001G084600.1.p			GO:0008152,GO:0016758	metabolic process,transferase activity, transferring hexosyl groups	Zm00008a019373_P01			GO:0008152,GO:0016758	metabolic process,transferase activity, transferring hexosyl groups
Npp.01B009790.1	AT3G02100.1			GO:0008152,GO:0016758	metabolic process,transferase activity, transferring hexosyl groups	LOC_Os03g55020.1			GO:0008152,GO:0016758	metabolic process,transferase activity, transferring hexosyl groups	Sobic.001G084500.1.p			GO:0008152,GO:0016758	metabolic process,transferase activity, transferring hexosyl groups	Zm00008a005236_P01			GO:0008152,GO:0016758	metabolic process,transferase activity, transferring hexosyl groups
Npp.01B010000.1	AT5G48050.1															Zm00008a029430_P01
Npp.01B010440.1	AT5G35840.1			GO:0005515,GO:0006355,GO:0009584,GO:0018298	protein binding,regulation of transcription, DNA-templated,detection of visible light,protein-chromophore linkage	LOC_Os03g54084.1			GO:0000155,GO:0004871,GO:0005515,GO:0005524,GO:0006355,GO:0007165,GO:0009584,GO:0016020,GO:0018298	phosphorelay sensor kinase activity,obsolete signal transducer activity,protein binding,ATP binding,regulation of transcription, DNA-templated,signal transduction,detection of visible light,membrane,protein-chromophore linkage	Sobic.001G087100.1.p			GO:0000155,GO:0005515,GO:0006355,GO:0007165,GO:0009584,GO:0018298	phosphorelay sensor kinase activity,protein binding,regulation of transcription, DNA-templated,signal transduction,detection of visible light,protein-chromophore linkage	Zm00008a005207_P01			GO:0000155,GO:0005515,GO:0006355,GO:0007165,GO:0009584,GO:0018298	phosphorelay sensor kinase activity,protein binding,regulation of transcription, DNA-templated,signal transduction,detection of visible light,protein-chromophore linkage
Npp.01B010480.1	AT5G45890.1			GO:0006508,GO:0008234	proteolysis,cysteine-type peptidase activity	LOC_Os03g54130.1			GO:0006508,GO:0008234	proteolysis,cysteine-type peptidase activity	Sobic.001G086800.1.p			GO:0006508,GO:0008234	proteolysis,cysteine-type peptidase activity	Zm00008a019391_P01			GO:0006508,GO:0008234	proteolysis,cysteine-type peptidase activity
Npp.01B012480.1	AT4G08170.2	K00913	ITPK1; inositol-1,3,4-trisphosphate 5/6-kinase / inositol-tetrakisphosphate 1-kinase [EC:2.7.1.159 2.7.1.134]	GO:0000287,GO:0005524,GO:0005622,GO:0032957,GO:0047325,GO:0052725,GO:0052726	magnesium ion binding,ATP binding,intracellular anatomical structure,inositol trisphosphate metabolic process,inositol tetrakisphosphate 1-kinase activity,inositol-1,3,4-trisphosphate 6-kinase activity,inositol-1,3,4-trisphosphate 5-kinase activity	LOC_Os03g51610.1	K00913	ITPK1; inositol-1,3,4-trisphosphate 5/6-kinase / inositol-tetrakisphosphate 1-kinase [EC:2.7.1.159 2.7.1.134]	GO:0000287,GO:0005524,GO:0005622,GO:0032957,GO:0047325,GO:0052725,GO:0052726	magnesium ion binding,ATP binding,intracellular anatomical structure,inositol trisphosphate metabolic process,inositol tetrakisphosphate 1-kinase activity,inositol-1,3,4-trisphosphate 6-kinase activity,inositol-1,3,4-trisphosphate 5-kinase activity	Sobic.001G106900.3.p	K00913	ITPK1; inositol-1,3,4-trisphosphate 5/6-kinase / inositol-tetrakisphosphate 1-kinase [EC:2.7.1.159 2.7.1.134]	GO:0000287,GO:0005524,GO:0005622,GO:0032957,GO:0047325,GO:0052725,GO:0052726	magnesium ion binding,ATP binding,intracellular anatomical structure,inositol trisphosphate metabolic process,inositol tetrakisphosphate 1-kinase activity,inositol-1,3,4-trisphosphate 6-kinase activity,inositol-1,3,4-trisphosphate 5-kinase activity	Zm00008a005049_P01	K00913	ITPK1; inositol-1,3,4-trisphosphate 5/6-kinase / inositol-tetrakisphosphate 1-kinase [EC:2.7.1.159 2.7.1.134]	GO:0000287,GO:0005524,GO:0005622,GO:0032957,GO:0047325,GO:0052725,GO:0052726	magnesium ion binding,ATP binding,intracellular anatomical structure,inositol trisphosphate metabolic process,inositol tetrakisphosphate 1-kinase activity,inositol-1,3,4-trisphosphate 6-kinase activity,inositol-1,3,4-trisphosphate 5-kinase activity
Npp.01B012490.1	AT4G14960.2	K07374	TUBA; tubulin alpha	GO:0003924	GTPase activity	LOC_Os11g14220.1	K07374	TUBA; tubulin alpha	GO:0003924,GO:0005200,GO:0005525,GO:0005874,GO:0006184,GO:0007017,GO:0043234,GO:0051258	GTPase activity,structural constituent of cytoskeleton,GTP binding,microtubule,obsolete GTP catabolic process,microtubule-based process,,protein polymerization	Sobic.001G107200.1.p	K07374	TUBA; tubulin alpha	GO:0003924,GO:0005874,GO:0007017	GTPase activity,microtubule,microtubule-based process	Zm00008a035818_P01	K07374	TUBA; tubulin alpha	GO:0003924,GO:0005874,GO:0007017	GTPase activity,microtubule,microtubule-based process
Npp.01B012500.1	AT4G14960.2	K07374	TUBA; tubulin alpha	GO:0003924	GTPase activity	LOC_Os11g14220.1	K07374	TUBA; tubulin alpha	GO:0003924,GO:0005200,GO:0005525,GO:0005874,GO:0006184,GO:0007017,GO:0043234,GO:0051258	GTPase activity,structural constituent of cytoskeleton,GTP binding,microtubule,obsolete GTP catabolic process,microtubule-based process,,protein polymerization	Sobic.001G107100.1.p	K07374	TUBA; tubulin alpha	GO:0003924,GO:0005874,GO:0007017	GTPase activity,microtubule,microtubule-based process	Zm00008a035818_P01	K07374	TUBA; tubulin alpha	GO:0003924,GO:0005874,GO:0007017	GTPase activity,microtubule,microtubule-based process
Npp.01B012570.1	AT5G58040.1					LOC_Os03g51520.1					Sobic.001G107900.1.p					Zm00008a005044_P01
Npp.01B012760.1																Zm00008a039107_P01			GO:0003676,GO:0008270	nucleic acid binding,zinc ion binding
Npp.01B012770.1						LOC_Os03g50420.1					Sobic.001G116900.2.p					Zm00008a004983_P01
Npp.01B012840.1	AT4G22760.1					LOC_Os08g06490.2			GO:0005515	protein binding	Sobic.001G117600.1.p					Zm00008a004978_P01			GO:0009733	response to auxin
Npp.01B012850.1						LOC_Os12g08030.1					Sobic.001G117701.1.p
Npp.01B012860.1	AT1G62020.1	K05236	COPA, RET1; coatomer subunit alpha	GO:0005198,GO:0005515,GO:0006886,GO:0016192,GO:0030117,GO:0030126	structural molecule activity,protein binding,intracellular protein transport,vesicle-mediated transport,membrane coat,COPI vesicle coat	LOC_Os09g04110.1			GO:0005198,GO:0005515,GO:0006886,GO:0016192,GO:0030117,GO:0030126	structural molecule activity,protein binding,intracellular protein transport,vesicle-mediated transport,membrane coat,COPI vesicle coat	Sobic.001G117800.1.p	K05236	COPA, RET1; coatomer subunit alpha	GO:0005198,GO:0005515,GO:0006886,GO:0016192,GO:0030117,GO:0030126	structural molecule activity,protein binding,intracellular protein transport,vesicle-mediated transport,membrane coat,COPI vesicle coat	Zm00008a004981_P01	K05236	COPA, RET1; coatomer subunit alpha	GO:0005198,GO:0005515,GO:0006886,GO:0016192,GO:0030117,GO:0030126	structural molecule activity,protein binding,intracellular protein transport,vesicle-mediated transport,membrane coat,COPI vesicle coat
Npp.01B018240.1	AT5G67320.1	K04508	TBL1; transducin (beta)-like 1	GO:0005515	protein binding	LOC_Os07g22220.1			GO:0005515	protein binding	Sobic.001G169600.2.p			GO:0005515	protein binding	Zm00008a004688_P01			GO:0005515	protein binding
Npp.01B018310.1																Zm00008a039215_P01			GO:0003676,GO:0008270,GO:0015074	nucleic acid binding,zinc ion binding,DNA integration
Npp.01B018360.1	AT1G48120.1			GO:0016787	hydrolase activity	LOC_Os03g24630.1					Sobic.001G170900.2.p					Zm00008a004554_P01
Npp.01B018370.1	AT1G45248.5			GO:0018024	histone-lysine N-methyltransferase activity	LOC_Os09g02690.1			GO:0018024	histone-lysine N-methyltransferase activity	Sobic.001G171100.1.p			GO:0018024	histone-lysine N-methyltransferase activity	Zm00008a004552_P01			GO:0018024	histone-lysine N-methyltransferase activity
Npp.01B020310.1	AT1G13080.1			GO:0005506,GO:0016705,GO:0020037,GO:0055114	iron ion binding,oxidoreductase activity, acting on paired donors, with incorporation or reduction of molecular oxygen,heme binding,obsolete oxidation-reduction process	LOC_Os03g39650.1	K00517	CYP81F; indol-3-yl-methylglucosinolate hydroxylase [EC:1.14.-.-]	GO:0005506,GO:0016705,GO:0020037,GO:0055114	iron ion binding,oxidoreductase activity, acting on paired donors, with incorporation or reduction of molecular oxygen,heme binding,obsolete oxidation-reduction process	Sobic.001G176600.1.p			GO:0005506,GO:0016705,GO:0020037,GO:0055114	iron ion binding,oxidoreductase activity, acting on paired donors, with incorporation or reduction of molecular oxygen,heme binding,obsolete oxidation-reduction process	Zm00008a004517_P01			GO:0005506,GO:0016705,GO:0020037,GO:0055114	iron ion binding,oxidoreductase activity, acting on paired donors, with incorporation or reduction of molecular oxygen,heme binding,obsolete oxidation-reduction process
Npp.01B020500.1	AT3G15480.1					LOC_Os10g35294.1					Sobic.001G206400.1.p					Zm00008a004079_P01
Npp.01B020510.1	AT5G60200.1			GO:0003677,GO:0006355	DNA binding,regulation of transcription, DNA-templated	LOC_Os10g35300.2			GO:0003677,GO:0006355	DNA binding,regulation of transcription, DNA-templated	Sobic.001G206300.1.p			GO:0003677,GO:0006355	DNA binding,regulation of transcription, DNA-templated	Zm00008a004078_P01			GO:0003677,GO:0006355	DNA binding,regulation of transcription, DNA-templated
Npp.01B021760.1	AT5G62600.1	K15436	TRPO3, MTR10; transportin-3			LOC_Os10g33770.1			GO:0006886,GO:0008536	intracellular protein transport,	Sobic.001G219600.1.p	K15436	TRPO3, MTR10; transportin-3
Npp.01B024520.1											Sobic.010G026100.1.p					Zm00008a039445_P01
Npp.01B025350.1																Zm00008a039211_P01			GO:0003676,GO:0008270	nucleic acid binding,zinc ion binding
Npp.01B025360.1	AT3G24503.1	K12355	REF1; coniferyl-aldehyde dehydrogenase [EC:1.2.1.68]	GO:0008152,GO:0016491,GO:0055114	metabolic process,oxidoreductase activity,obsolete oxidation-reduction process	LOC_Os01g40870.1	K12355	REF1; coniferyl-aldehyde dehydrogenase [EC:1.2.1.68]	GO:0008152,GO:0016491,GO:0016620,GO:0055114	metabolic process,oxidoreductase activity,oxidoreductase activity, acting on the aldehyde or oxo group of donors, NAD or NADP as acceptor,obsolete oxidation-reduction process	Sobic.003G203600.1.p	K12355	REF1; coniferyl-aldehyde dehydrogenase [EC:1.2.1.68]	GO:0008152,GO:0016491,GO:0055114	metabolic process,oxidoreductase activity,obsolete oxidation-reduction process	Zm00008a014526_P01	K12355	REF1; coniferyl-aldehyde dehydrogenase [EC:1.2.1.68]	GO:0008152,GO:0016491,GO:0055114	metabolic process,oxidoreductase activity,obsolete oxidation-reduction process
Npp.01B025460.1	AT1G28590.1			GO:0016788	hydrolase activity, acting on ester bonds	LOC_Os10g25400.1			GO:0006629,GO:0016788	lipid metabolic process,hydrolase activity, acting on ester bonds	Sobic.001G258300.1.p			GO:0016788	hydrolase activity, acting on ester bonds	Zm00008a020188_P01			GO:0016788	hydrolase activity, acting on ester bonds
Npp.01B025780.1	AT5G07990.1	K05280	CYP75B1; flavonoid 3'-monooxygenase [EC:1.14.14.82]	GO:0005506,GO:0016705,GO:0020037,GO:0055114	iron ion binding,oxidoreductase activity, acting on paired donors, with incorporation or reduction of molecular oxygen,heme binding,obsolete oxidation-reduction process	LOC_Os10g16974.1	K05280	CYP75B1; flavonoid 3'-monooxygenase [EC:1.14.14.82]	GO:0005506,GO:0016705,GO:0020037,GO:0055114	iron ion binding,oxidoreductase activity, acting on paired donors, with incorporation or reduction of molecular oxygen,heme binding,obsolete oxidation-reduction process	Sobic.009G162500.1.p	K05280	CYP75B1; flavonoid 3'-monooxygenase [EC:1.14.14.82]	GO:0005506,GO:0016705,GO:0020037,GO:0055114	iron ion binding,oxidoreductase activity, acting on paired donors, with incorporation or reduction of molecular oxygen,heme binding,obsolete oxidation-reduction process	Zm00008a031477_P01	K05280	CYP75B1; flavonoid 3'-monooxygenase [EC:1.14.14.82]	GO:0005506,GO:0016705,GO:0020037,GO:0055114	iron ion binding,oxidoreductase activity, acting on paired donors, with incorporation or reduction of molecular oxygen,heme binding,obsolete oxidation-reduction process
Npp.01B029100.1											Sobic.010G132900.1.p
Npp.01B030040.1	AT1G30825.1	K05758	ARPC2; actin related protein 2/3 complex, subunit 2	GO:0005885,GO:0015629,GO:0030833,GO:0034314	Arp2/3 protein complex,actin cytoskeleton,regulation of actin filament polymerization,Arp2/3 complex-mediated actin nucleation	LOC_Os01g46580.1	K05758	ARPC2; actin related protein 2/3 complex, subunit 2	GO:0005856,GO:0030833	cytoskeleton,regulation of actin filament polymerization	Sobic.001G289700.1.p	K05758	ARPC2; actin related protein 2/3 complex, subunit 2	GO:0005885,GO:0015629,GO:0030833,GO:0034314	Arp2/3 protein complex,actin cytoskeleton,regulation of actin filament polymerization,Arp2/3 complex-mediated actin nucleation	Zm00008a010444_P01	K05758	ARPC2; actin related protein 2/3 complex, subunit 2	GO:0005885,GO:0015629,GO:0030833,GO:0034314	Arp2/3 protein complex,actin cytoskeleton,regulation of actin filament polymerization,Arp2/3 complex-mediated actin nucleation
Npp.01B030050.1	AT3G48060.1			GO:0003677,GO:0003682,GO:0005634,GO:0006351	DNA binding,chromatin binding,nucleus,transcription, DNA-templated	LOC_Os02g50840.2			GO:0003677,GO:0003682,GO:0005634,GO:0006351	DNA binding,chromatin binding,nucleus,transcription, DNA-templated	Sobic.001G289800.2.p			GO:0003677,GO:0003682,GO:0005634,GO:0006351	DNA binding,chromatin binding,nucleus,transcription, DNA-templated	Zm00008a034948_P01			GO:0003677,GO:0003682,GO:0005634,GO:0006351	DNA binding,chromatin binding,nucleus,transcription, DNA-templated
Npp.01B030220.1	AT5G45610.1										Sobic.004G027400.1.p					Zm00008a018841_P01
Npp.01B030230.1	AT4G33510.1	K01626	E2.5.1.54, aroF, aroG, aroH; 3-deoxy-7-phosphoheptulonate synthase [EC:2.5.1.54]	GO:0003849,GO:0009073	3-deoxy-7-phosphoheptulonate synthase activity,aromatic amino acid family biosynthetic process	LOC_Os10g41480.1	K01626	E2.5.1.54, aroF, aroG, aroH; 3-deoxy-7-phosphoheptulonate synthase [EC:2.5.1.54]	GO:0003849,GO:0009073	3-deoxy-7-phosphoheptulonate synthase activity,aromatic amino acid family biosynthetic process	Sobic.001G294500.1.p	K01626	E2.5.1.54, aroF, aroG, aroH; 3-deoxy-7-phosphoheptulonate synthase [EC:2.5.1.54]	GO:0003849,GO:0009073	3-deoxy-7-phosphoheptulonate synthase activity,aromatic amino acid family biosynthetic process	Zm00008a009798_P01	K01626	E2.5.1.54, aroF, aroG, aroH; 3-deoxy-7-phosphoheptulonate synthase [EC:2.5.1.54]	GO:0003849,GO:0009073	3-deoxy-7-phosphoheptulonate synthase activity,aromatic amino acid family biosynthetic process
Npp.01B030420.1	AT5G51190.1			GO:0003700,GO:0006355	DNA-binding transcription factor activity,regulation of transcription, DNA-templated	LOC_Os10g41330.1			GO:0003700,GO:0006355	DNA-binding transcription factor activity,regulation of transcription, DNA-templated	Sobic.001G296300.1.p	K09286	EREBP; EREBP-like factor	GO:0003700,GO:0006355	DNA-binding transcription factor activity,regulation of transcription, DNA-templated	Zm00008a002083_P01	K09286	EREBP; EREBP-like factor	GO:0003700,GO:0006355	DNA-binding transcription factor activity,regulation of transcription, DNA-templated
Npp.01B030430.1	AT3G60340.1	K01074	PPT; palmitoyl-protein thioesterase [EC:3.1.2.22]	GO:0098599	palmitoyl hydrolase activity	LOC_Os10g41340.1	K01074	PPT; palmitoyl-protein thioesterase [EC:3.1.2.22]	GO:0006464,GO:0008474	cellular protein modification process,palmitoyl-(protein) hydrolase activity	Sobic.001G296400.4.p	K01074	PPT; palmitoyl-protein thioesterase [EC:3.1.2.22]	GO:0098599	palmitoyl hydrolase activity	Zm00008a000024_P01	K01074	PPT; palmitoyl-protein thioesterase [EC:3.1.2.22]	GO:0098599	palmitoyl hydrolase activity
Npp.01B031240.1	AT1G76630.2	K12600	SKI3, TTC37; superkiller protein 3			LOC_Os01g68680.1	K09667	OGT; protein O-GlcNAc transferase [EC:2.4.1.255]	GO:0005515	protein binding	Sobic.001G306900.1.p	K12600	SKI3, TTC37; superkiller protein 3			Zm00008a002006_P01	K12600	SKI3, TTC37; superkiller protein 3	GO:0005515	protein binding
Npp.01B031250.1	AT5G52420.1					LOC_Os10g40040.1					Sobic.001G307000.1.p					Zm00008a002007_P01
Npp.01B031390.1	AT4G37340.1	K00517	CYP81F; indol-3-yl-methylglucosinolate hydroxylase [EC:1.14.-.-]	GO:0005506,GO:0016705,GO:0020037,GO:0055114	iron ion binding,oxidoreductase activity, acting on paired donors, with incorporation or reduction of molecular oxygen,heme binding,obsolete oxidation-reduction process	LOC_Os02g30090.1	K00517	CYP81F; indol-3-yl-methylglucosinolate hydroxylase [EC:1.14.-.-]	GO:0005506,GO:0016705,GO:0020037,GO:0055114	iron ion binding,oxidoreductase activity, acting on paired donors, with incorporation or reduction of molecular oxygen,heme binding,obsolete oxidation-reduction process	Sobic.001G369600.3.p			GO:0005506,GO:0016705,GO:0020037,GO:0055114	iron ion binding,oxidoreductase activity, acting on paired donors, with incorporation or reduction of molecular oxygen,heme binding,obsolete oxidation-reduction process	Zm00008a001502_P01			GO:0005506,GO:0016705,GO:0020037,GO:0055114	iron ion binding,oxidoreductase activity, acting on paired donors, with incorporation or reduction of molecular oxygen,heme binding,obsolete oxidation-reduction process
Npp.01B038560.1	AT2G47510.1	K01679	E4.2.1.2B, fumC, FH; fumarate hydratase, class II [EC:4.2.1.2]	GO:0006099,GO:0016829	tricarboxylic acid cycle,lyase activity	LOC_Os03g21950.1	K01679	E4.2.1.2B, fumC, FH; fumarate hydratase, class II [EC:4.2.1.2]	GO:0003824,GO:0004333,GO:0006099,GO:0006106,GO:0016829,GO:0045239	catalytic activity,fumarate hydratase activity,tricarboxylic acid cycle,fumarate metabolic process,lyase activity,tricarboxylic acid cycle enzyme complex	Sobic.001G378800.3.p	K01679	E4.2.1.2B, fumC, FH; fumarate hydratase, class II [EC:4.2.1.2]	GO:0006099,GO:0016829	tricarboxylic acid cycle,lyase activity	Zm00008a001436_P01	K01679	E4.2.1.2B, fumC, FH; fumarate hydratase, class II [EC:4.2.1.2]	GO:0006099,GO:0016829	tricarboxylic acid cycle,lyase activity
Npp.01B038570.1	AT2G47510.1	K01679	E4.2.1.2B, fumC, FH; fumarate hydratase, class II [EC:4.2.1.2]	GO:0006099,GO:0016829	tricarboxylic acid cycle,lyase activity	LOC_Os03g21950.1	K01679	E4.2.1.2B, fumC, FH; fumarate hydratase, class II [EC:4.2.1.2]	GO:0003824,GO:0004333,GO:0006099,GO:0006106,GO:0016829,GO:0045239	catalytic activity,fumarate hydratase activity,tricarboxylic acid cycle,fumarate metabolic process,lyase activity,tricarboxylic acid cycle enzyme complex	Sobic.001G378800.3.p	K01679	E4.2.1.2B, fumC, FH; fumarate hydratase, class II [EC:4.2.1.2]	GO:0006099,GO:0016829	tricarboxylic acid cycle,lyase activity	Zm00008a001436_P01	K01679	E4.2.1.2B, fumC, FH; fumarate hydratase, class II [EC:4.2.1.2]	GO:0006099,GO:0016829	tricarboxylic acid cycle,lyase activity
Npp.01B038580.1	AT3G53120.1	K12185	VPS37; ESCRT-I complex subunit VPS37			LOC_Os03g08770.1					Sobic.001G478300.1.p	K12185	VPS37; ESCRT-I complex subunit VPS37			Zm00008a000563_P01	K12185	VPS37; ESCRT-I complex subunit VPS37
Npp.01B038590.1	AT3G08860.1	K00827	AGXT2; alanine-glyoxylate transaminase / (R)-3-amino-2-methylpropionate-pyruvate transaminase [EC:2.6.1.44 2.6.1.40]	GO:0008483,GO:0030170	transaminase activity,pyridoxal phosphate binding	LOC_Os03g21960.1	K00827	AGXT2; alanine-glyoxylate transaminase / (R)-3-amino-2-methylpropionate-pyruvate transaminase [EC:2.6.1.44 2.6.1.40]	GO:0003824,GO:0008483,GO:0030170	catalytic activity,transaminase activity,pyridoxal phosphate binding	Sobic.001G379000.1.p	K00827	AGXT2; alanine-glyoxylate transaminase / (R)-3-amino-2-methylpropionate-pyruvate transaminase [EC:2.6.1.44 2.6.1.40]	GO:0008483,GO:0030170	transaminase activity,pyridoxal phosphate binding	Zm00008a001432_P01	K00827	AGXT2; alanine-glyoxylate transaminase / (R)-3-amino-2-methylpropionate-pyruvate transaminase [EC:2.6.1.44 2.6.1.40]	GO:0008483,GO:0030170	transaminase activity,pyridoxal phosphate binding
Npp.01B038870.1	AT2G38650.1	K13648	GAUT; alpha-1,4-galacturonosyltransferase [EC:2.4.1.43]	GO:0016757,GO:0047262	transferase activity, transferring glycosyl groups,polygalacturonate 4-alpha-galacturonosyltransferase activity	LOC_Os03g21250.1	K13648	GAUT; alpha-1,4-galacturonosyltransferase [EC:2.4.1.43]	GO:0016757	transferase activity, transferring glycosyl groups	Sobic.001G384200.1.p	K13648	GAUT; alpha-1,4-galacturonosyltransferase [EC:2.4.1.43]	GO:0016757,GO:0047262	transferase activity, transferring glycosyl groups,polygalacturonate 4-alpha-galacturonosyltransferase activity	Zm00008a001390_P01	K13648	GAUT; alpha-1,4-galacturonosyltransferase [EC:2.4.1.43]	GO:0016757,GO:0047262	transferase activity, transferring glycosyl groups,polygalacturonate 4-alpha-galacturonosyltransferase activity
Npp.01B039040.1						LOC_Os11g44890.1					Sobic.006G107332.1.p
Npp.01B039050.1	AT5G18270.1			GO:0003677,GO:0006355	DNA binding,regulation of transcription, DNA-templated	LOC_Os03g21030.1			GO:0003677,GO:0006355	DNA binding,regulation of transcription, DNA-templated	Sobic.001G386000.1.p			GO:0003677,GO:0006355	DNA binding,regulation of transcription, DNA-templated	Zm00008a001371_P01
Npp.01B042750.1	AT2G29690.1	K01657	trpE; anthranilate synthase component I [EC:4.1.3.27]	GO:0009058,GO:0016833	biosynthetic process,oxo-acid-lyase activity	LOC_Os03g15780.1	K01657	trpE; anthranilate synthase component I [EC:4.1.3.27]	GO:0000162,GO:0004049,GO:0009058,GO:0016833	tryptophan biosynthetic process,anthranilate synthase activity,biosynthetic process,oxo-acid-lyase activity	Sobic.001G427700.1.p	K01657	trpE; anthranilate synthase component I [EC:4.1.3.27]	GO:0009058,GO:0016833	biosynthetic process,oxo-acid-lyase activity	Zm00008a001024_P01	K01657	trpE; anthranilate synthase component I [EC:4.1.3.27]	GO:0009058,GO:0016833	biosynthetic process,oxo-acid-lyase activity
Npp.01B042770.1	AT3G09010.1			GO:0004672,GO:0006468	protein kinase activity,protein phosphorylation	LOC_Os03g15770.2			GO:0004672,GO:0004674,GO:0004713,GO:0005524,GO:0006468	protein kinase activity,protein serine/threonine kinase activity,protein tyrosine kinase activity,ATP binding,protein phosphorylation	Sobic.001G427800.1.p			GO:0004672,GO:0005524,GO:0006468	protein kinase activity,ATP binding,protein phosphorylation	Zm00008a001023_P01	K04733	IRAK4; interleukin-1 receptor-associated kinase 4 [EC:2.7.11.1]	GO:0004672,GO:0005524,GO:0006468	protein kinase activity,ATP binding,protein phosphorylation
Npp.01B042970.1	AT4G08250.1					LOC_Os03g15680.1					Sobic.001G428600.2.p					Zm00008a001015_P01
Npp.01B043090.1	AT5G22090.1					LOC_Os03g15530.1					Sobic.001G429700.1.p					Zm00008a035646_P01
Npp.01B043100.1	AT5G22080.1	K09528	DNAJC8; DnaJ homolog subfamily C member 8			LOC_Os03g15480.1	K09528	DNAJC8; DnaJ homolog subfamily C member 8			Sobic.001G429800.1.p	K09528	DNAJC8; DnaJ homolog subfamily C member 8			Zm00008a001005_P01	K09528	DNAJC8; DnaJ homolog subfamily C member 8
Npp.01B043190.1	AT1G70130.1			GO:0004672,GO:0005524,GO:0006468,GO:0030246	protein kinase activity,ATP binding,protein phosphorylation,carbohydrate binding	LOC_Os04g44910.1			GO:0004672,GO:0004674,GO:0004713,GO:0005524,GO:0006468,GO:0030246	protein kinase activity,protein serine/threonine kinase activity,protein tyrosine kinase activity,ATP binding,protein phosphorylation,carbohydrate binding	Sobic.001G431600.1.p			GO:0004672,GO:0005524,GO:0006468,GO:0030246	protein kinase activity,ATP binding,protein phosphorylation,carbohydrate binding	Zm00008a000991_P01			GO:0004672,GO:0005524,GO:0006468,GO:0030246	protein kinase activity,ATP binding,protein phosphorylation,carbohydrate binding
Npp.01B043200.1	AT3G53810.1			GO:0004672,GO:0005524,GO:0006468,GO:0030246	protein kinase activity,ATP binding,protein phosphorylation,carbohydrate binding	LOC_Os03g15250.1			GO:0004672,GO:0004674,GO:0004713,GO:0005524,GO:0006468,GO:0030246	protein kinase activity,protein serine/threonine kinase activity,protein tyrosine kinase activity,ATP binding,protein phosphorylation,carbohydrate binding	Sobic.001G431600.1.p			GO:0004672,GO:0005524,GO:0006468,GO:0030246	protein kinase activity,ATP binding,protein phosphorylation,carbohydrate binding	Zm00008a000991_P01			GO:0004672,GO:0005524,GO:0006468,GO:0030246	protein kinase activity,ATP binding,protein phosphorylation,carbohydrate binding
Npp.01B043210.1	AT5G22080.1	K09528	DNAJC8; DnaJ homolog subfamily C member 8			LOC_Os03g15480.1	K09528	DNAJC8; DnaJ homolog subfamily C member 8			Sobic.001G429800.1.p	K09528	DNAJC8; DnaJ homolog subfamily C member 8			Zm00008a001005_P01	K09528	DNAJC8; DnaJ homolog subfamily C member 8
Npp.01B049440.1	AT2G36810.1					LOC_Os03g05330.1					Sobic.001G504200.1.p					Zm00008a000354_P01
Npp.01B053020.1	AT4G10130.1	K17867	DPH4, DNAJC24; diphthamide biosynthesis protein 4			LOC_Os09g28590.3					Sobic.001G537900.1.p	K17867	DPH4, DNAJC24; diphthamide biosynthesis protein 4			Zm00008a009034_P01	K17867	DPH4, DNAJC24; diphthamide biosynthesis protein 4
Npp.01B053060.1						LOC_Os09g38360.1					Sobic.006G202900.1.p					Zm00008a010875_P01
Npp.02C000140.1											Sobic.003G372950.1.p
Npp.02C000340.1	AT4G38180.1			GO:0006355,GO:0008270	regulation of transcription, DNA-templated,zinc ion binding	LOC_Os05g40680.1					Sobic.001G195550.1.p			GO:0006355	regulation of transcription, DNA-templated	Zm00008a035670_P01			GO:0006355	regulation of transcription, DNA-templated
Npp.02C000350.1	AT4G15880.1	K08592	SENP1; sentrin-specific protease 1 [EC:3.4.22.68]	GO:0006508,GO:0008234	proteolysis,cysteine-type peptidase activity	LOC_Os01g16730.1			GO:0006508,GO:0008234	proteolysis,cysteine-type peptidase activity	Sobic.002G097601.1.p			GO:0006508,GO:0008234	proteolysis,cysteine-type peptidase activity	Zm00008a002514_P01			GO:0006508,GO:0008234	proteolysis,cysteine-type peptidase activity
Npp.02C000360.1	AT5G14870.1	K05391	CNGC; cyclic nucleotide gated channel, plant	GO:0005216,GO:0006811,GO:0016020,GO:0055085	ion channel activity,ion transport,membrane,transmembrane transport	LOC_Os12g06570.1	K05391	CNGC; cyclic nucleotide gated channel, plant	GO:0005216,GO:0005249,GO:0006811,GO:0006813,GO:0016020,GO:0055085	ion channel activity,voltage-gated potassium channel activity,ion transport,potassium ion transport,membrane,transmembrane transport	Sobic.002G000200.1.p	K05391	CNGC; cyclic nucleotide gated channel, plant	GO:0005216,GO:0006811,GO:0016020,GO:0055085	ion channel activity,ion transport,membrane,transmembrane transport	Zm00008a010529_P01	K05391	CNGC; cyclic nucleotide gated channel, plant	GO:0005216,GO:0006811,GO:0016020,GO:0055085	ion channel activity,ion transport,membrane,transmembrane transport
Npp.02C001750.1	AT5G45460.1					LOC_Os03g24410.1					Sobic.008G158000.1.p					Zm00008a010555_P01
Npp.02C001760.1						LOC_Os03g24410.1					Sobic.008G183100.2.p					Zm00008a009003_P01
Npp.02C001770.1	AT5G45480.1					LOC_Os07g02480.1					Sobic.002G011100.1.p					Zm00008a010555_P01
Npp.02C001900.1	AT4G05050.1	K04551,K08770	UBB; ubiquitin B,UBC; ubiquitin C			LOC_Os05g42424.1	K08770	UBC; ubiquitin C	GO:0005515	protein binding	Sobic.002G013550.1.p	K08770	UBC; ubiquitin C	GO:0005515	protein binding	Zm00008a018740_P01	K04551,K08770	UBB; ubiquitin B,UBC; ubiquitin C	GO:0005515	protein binding
Npp.02C002160.1											Sobic.002G098300.1.p
Npp.02C002180.1																Zm00008a039035_P01
Npp.02C004270.1	AT2G18470.1			GO:0004672,GO:0006468	protein kinase activity,protein phosphorylation	LOC_Os07g04520.1			GO:0004672,GO:0004674,GO:0004713,GO:0005524,GO:0006468	protein kinase activity,protein serine/threonine kinase activity,protein tyrosine kinase activity,ATP binding,protein phosphorylation	Sobic.002G029000.1.p			GO:0004672,GO:0005524,GO:0006468	protein kinase activity,ATP binding,protein phosphorylation	Zm00008a010585_P01
Npp.02C006390.1	AT2G29200.1	K17943	PUM; pumilio RNA-binding family	GO:0003723	RNA binding	LOC_Os02g57390.1			GO:0003723	RNA binding	Sobic.002G049800.1.p	K17943	PUM; pumilio RNA-binding family	GO:0003723	RNA binding	Zm00008a026907_P01	K17943	PUM; pumilio RNA-binding family	GO:0003723	RNA binding
Npp.02C006400.1						LOC_Os03g01490.1					Sobic.002G050000.1.p					Zm00008a010868_P01
Npp.02C006410.1						LOC_Os11g02230.1					Sobic.002G050000.1.p					Zm00008a010868_P01
Npp.02C006420.1						LOC_Os05g03490.1					Sobic.002G050000.1.p					Zm00008a010875_P01
Npp.02C015290.1	AT3G01410.1															Zm00008a039164_P01
Npp.02C015310.1	AT2G39830.1			GO:0008270	zinc ion binding	LOC_Os03g16090.1			GO:0008270	zinc ion binding	Sobic.001G425100.1.p			GO:0008270	zinc ion binding	Zm00008a035617_P01			GO:0008270	zinc ion binding
Npp.02C015320.1	AT1G03495.1			GO:0016747	transferase activity, transferring acyl groups other than amino-acyl groups	LOC_Os02g57480.1			GO:0016747	transferase activity, transferring acyl groups other than amino-acyl groups	Sobic.002G139200.1.p			GO:0016747	transferase activity, transferring acyl groups other than amino-acyl groups	Zm00008a008577_P01			GO:0016747	transferase activity, transferring acyl groups other than amino-acyl groups
Npp.02C015610.1	AT1G55860.1	K10592	HUWE1, MULE, ARF-BP1; E3 ubiquitin-protein ligase HUWE1 [EC:2.3.2.26]	GO:0004842	ubiquitin-protein transferase activity	LOC_Os09g07900.1	K10592	HUWE1, MULE, ARF-BP1; E3 ubiquitin-protein ligase HUWE1 [EC:2.3.2.26]	GO:0004842,GO:0005515	ubiquitin-protein transferase activity,protein binding	Sobic.002G147600.1.p	K10592	HUWE1, MULE, ARF-BP1; E3 ubiquitin-protein ligase HUWE1 [EC:2.3.2.26]	GO:0004842	ubiquitin-protein transferase activity	Zm00008a008450_P01	K10592	HUWE1, MULE, ARF-BP1; E3 ubiquitin-protein ligase HUWE1 [EC:2.3.2.26]	GO:0004842	ubiquitin-protein transferase activity
Npp.02C028640.1	AT3G06190.1	K10523	SPOP; speckle-type POZ protein	GO:0005515	protein binding	LOC_Os10g29310.1			GO:0005515	protein binding	Sobic.002G086300.1.p	K10523	SPOP; speckle-type POZ protein	GO:0005515	protein binding	Zm00008a004482_P01	K10523	SPOP; speckle-type POZ protein	GO:0005515	protein binding
Npp.02C028650.1	AT4G34260.1	K15923	AXY8, FUC95A, afcA; alpha-L-fucosidase 2 [EC:3.2.1.51]			LOC_Os10g19334.1			GO:0004553,GO:0005975	hydrolase activity, hydrolyzing O-glycosyl compounds,carbohydrate metabolic process	Sobic.002G086500.1.p	K15923	AXY8, FUC95A, afcA; alpha-L-fucosidase 2 [EC:3.2.1.51]			Zm00008a002508_P01	K15923	AXY8, FUC95A, afcA; alpha-L-fucosidase 2 [EC:3.2.1.51]
Npp.02C028660.1	AT2G16385.1					LOC_Os11g21804.1					Sobic.002G086800.2.p					Zm00008a027148_P01
Npp.02C032860.1	AT2G36200.2	K10398	KIF11, EG5; kinesin family member 11	GO:0003777,GO:0005524,GO:0005871,GO:0007018,GO:0008017	microtubule motor activity,ATP binding,kinesin complex,microtubule-based movement,microtubule binding						Sobic.007G168900.1.p	K10398	KIF11, EG5; kinesin family member 11	GO:0003777,GO:0005524,GO:0005871,GO:0007018,GO:0008017	microtubule motor activity,ATP binding,kinesin complex,microtubule-based movement,microtubule binding	Zm00008a015866_P01	K10398	KIF11, EG5; kinesin family member 11	GO:0003777,GO:0005524,GO:0005871,GO:0007018,GO:0008017	microtubule motor activity,ATP binding,kinesin complex,microtubule-based movement,microtubule binding
Npp.02C033090.1											Sobic.008G029700.1.p					Zm00008a039516_P01			GO:0003676,GO:0008270,GO:0015074	nucleic acid binding,zinc ion binding,DNA integration
Npp.02C033100.1	AT2G32780.1	K11844	USP16_45; ubiquitin carboxyl-terminal hydrolase 16/45 [EC:3.4.19.12]	GO:0008270	zinc ion binding	LOC_Os09g32740.1			GO:0006511,GO:0008270	ubiquitin-dependent protein catabolic process,zinc ion binding	Sobic.002G256700.1.p	K11844	USP16_45; ubiquitin carboxyl-terminal hydrolase 16/45 [EC:3.4.19.12]	GO:0008270	zinc ion binding	Zm00008a009166_P01	K11844	USP16_45; ubiquitin carboxyl-terminal hydrolase 16/45 [EC:3.4.19.12]	GO:0008270	zinc ion binding
Npp.02C033150.1						LOC_Os01g71630.4					Sobic.009G078200.1.p
Npp.02C035130.1						LOC_Os04g46980.1			GO:0008152,GO:0016758	metabolic process,transferase activity, transferring hexosyl groups	Sobic.006G174500.1.p	K13495	CISZOG; cis-zeatin O-glucosyltransferase [EC:2.4.1.215]	GO:0008152,GO:0016758	metabolic process,transferase activity, transferring hexosyl groups	Zm00008a032863_P01	K13495	CISZOG; cis-zeatin O-glucosyltransferase [EC:2.4.1.215]	GO:0008152,GO:0016758	metabolic process,transferase activity, transferring hexosyl groups
Npp.02C035140.1	AT3G22600.1					LOC_Os07g39640.1					Sobic.009G180300.1.p					Zm00008a028718_P01
Npp.02C035150.1	AT5G03610.1			GO:0016788	hydrolase activity, acting on ester bonds	LOC_Os04g55660.1			GO:0006629,GO:0016788	lipid metabolic process,hydrolase activity, acting on ester bonds	Sobic.003G217900.2.p			GO:0016788	hydrolase activity, acting on ester bonds	Zm00008a009598_P01
Npp.02C035470.1	AT3G49930.1					LOC_Os07g39960.1			GO:0046872	metal ion binding	Sobic.002G359300.2.p					Zm00008a014169_P01
Npp.02C035480.1	AT1G25360.1					LOC_Os07g39910.1			GO:0005515	protein binding	Sobic.002G358900.3.p					Zm00008a029237_P01
Npp.02C037300.1	AT4G37050.1			GO:0006629	lipid metabolic process	LOC_Os03g27610.1			GO:0006629	lipid metabolic process	Sobic.002G377600.1.p			GO:0006629	lipid metabolic process	Zm00008a001671_P01			GO:0006629	lipid metabolic process
Npp.02C037310.1	AT1G52950.1	K07466	RFA1, RPA1, rpa; replication factor A1			LOC_Os01g73070.2					Sobic.009G086600.2.p					Zm00008a022305_P01	K07466	RFA1, RPA1, rpa; replication factor A1
Npp.02C037320.1	AT4G37050.1			GO:0006629	lipid metabolic process	LOC_Os03g27610.1			GO:0006629	lipid metabolic process	Sobic.002G377600.1.p			GO:0006629	lipid metabolic process	Zm00008a001671_P01			GO:0006629	lipid metabolic process
Npp.03C001270.1	AT4G18960.1	K09264	K09264; MADS-box transcription factor, plant	GO:0003677,GO:0003700,GO:0005634,GO:0006355,GO:0046983	DNA binding,DNA-binding transcription factor activity,nucleus,regulation of transcription, DNA-templated,protein dimerization activity	LOC_Os01g10504.1	K09264	K09264; MADS-box transcription factor, plant	GO:0003677,GO:0003700,GO:0005634,GO:0006355,GO:0046983	DNA binding,DNA-binding transcription factor activity,nucleus,regulation of transcription, DNA-templated,protein dimerization activity	Sobic.003G027000.1.p	K09264	K09264; MADS-box transcription factor, plant	GO:0003677,GO:0003700,GO:0005634,GO:0006355,GO:0046983	DNA binding,DNA-binding transcription factor activity,nucleus,regulation of transcription, DNA-templated,protein dimerization activity	Zm00008a010776_P01	K09264	K09264; MADS-box transcription factor, plant	GO:0003677,GO:0003700,GO:0005634,GO:0006355,GO:0046983	DNA binding,DNA-binding transcription factor activity,nucleus,regulation of transcription, DNA-templated,protein dimerization activity
Npp.03C001280.1	AT4G20520.1															Zm00008a033536_P01
Npp.03C001320.1	AT3G58770.1					LOC_Os01g10530.2					Sobic.003G026900.2.p					Zm00008a010777_P01
Npp.03C001330.1											Sobic.008G114401.1.p					Zm00008a005668_P01
Npp.03C001340.1	AT2G42840.1					LOC_Os01g10490.1					Sobic.003G027100.1.p					Zm00008a010775_P01
Npp.03C010250.1	AT5G62810.1	K13343	PEX14; peroxin-14	GO:0005515,GO:0005778,GO:0016560	protein binding,peroxisomal membrane,protein import into peroxisome matrix, docking	LOC_Os01g01720.1	K13343	PEX14; peroxin-14			Sobic.003G103200.1.p	K13343	PEX14; peroxin-14	GO:0005515,GO:0005778,GO:0016560	protein binding,peroxisomal membrane,protein import into peroxisome matrix, docking	Zm00008a011330_P01	K13343	PEX14; peroxin-14	GO:0005515,GO:0005778,GO:0016560	protein binding,peroxisomal membrane,protein import into peroxisome matrix, docking
Npp.03C010260.1	AT5G62790.2	K00099	dxr; 1-deoxy-D-xylulose-5-phosphate reductoisomerase [EC:1.1.1.267]	GO:0005515,GO:0008299,GO:0030604,GO:0046872,GO:0055114,GO:0070402	protein binding,isoprenoid biosynthetic process,1-deoxy-D-xylulose-5-phosphate reductoisomerase activity,metal ion binding,obsolete oxidation-reduction process,NADPH binding	LOC_Os01g01710.1	K00099	dxr; 1-deoxy-D-xylulose-5-phosphate reductoisomerase [EC:1.1.1.267]	GO:0005515,GO:0008299,GO:0030604,GO:0046872,GO:0055114,GO:0070402	protein binding,isoprenoid biosynthetic process,1-deoxy-D-xylulose-5-phosphate reductoisomerase activity,metal ion binding,obsolete oxidation-reduction process,NADPH binding	Sobic.003G103300.1.p	K00099	dxr; 1-deoxy-D-xylulose-5-phosphate reductoisomerase [EC:1.1.1.267]	GO:0005515,GO:0008299,GO:0030604,GO:0046872,GO:0055114,GO:0070402	protein binding,isoprenoid biosynthetic process,1-deoxy-D-xylulose-5-phosphate reductoisomerase activity,metal ion binding,obsolete oxidation-reduction process,NADPH binding	Zm00008a011331_P01	K00099	dxr; 1-deoxy-D-xylulose-5-phosphate reductoisomerase [EC:1.1.1.267]	GO:0005515,GO:0008299,GO:0030604,GO:0046872,GO:0055114,GO:0070402	protein binding,isoprenoid biosynthetic process,1-deoxy-D-xylulose-5-phosphate reductoisomerase activity,metal ion binding,obsolete oxidation-reduction process,NADPH binding
Npp.03C016120.1	AT2G32680.1			GO:0005515	protein binding	LOC_Os04g40440.1			GO:0005515	protein binding	Sobic.003G162600.1.p			GO:0005515	protein binding	Zm00008a011026_P01
Npp.03C016130.1											Sobic.010G026100.1.p					Zm00008a038956_P01
Npp.03C016840.1	AT1G66670.1	K01358	clpP, CLPP; ATP-dependent Clp protease, protease subunit [EC:3.4.21.92]			LOC_Os01g32350.1	K01358	clpP, CLPP; ATP-dependent Clp protease, protease subunit [EC:3.4.21.92]	GO:0004252,GO:0006508	serine-type endopeptidase activity,proteolysis	Sobic.003G170200.1.p	K01358	clpP, CLPP; ATP-dependent Clp protease, protease subunit [EC:3.4.21.92]			Zm00008a030608_P01	K01358	clpP, CLPP; ATP-dependent Clp protease, protease subunit [EC:3.4.21.92]
Npp.03C016940.1	AT3G47680.1					LOC_Os08g15530.1					Sobic.001G318432.1.p					Zm00008a037271_P01
Npp.03C016990.1																Zm00008a003632_P01
Npp.03C017000.1	ATMG00860.1										Sobic.008G088836.1.p					Zm00008a038975_P01
Npp.03C017070.1											Sobic.001G255001.1.p					Zm00008a039154_P01			GO:0015074	DNA integration
Npp.03C021910.1	AT1G70410.2	K01673	cynT, can; carbonic anhydrase [EC:4.2.1.1]	GO:0004089,GO:0008270	carbonate dehydratase activity,zinc ion binding	LOC_Os01g45274.1	K01673	cynT, can; carbonic anhydrase [EC:4.2.1.1]	GO:0004089,GO:0008270,GO:0015976	carbonate dehydratase activity,zinc ion binding,carbon utilization	Sobic.003G234200.6.p	K01673	cynT, can; carbonic anhydrase [EC:4.2.1.1]	GO:0004089,GO:0008270	carbonate dehydratase activity,zinc ion binding	Zm00008a014325_P01	K01673	cynT, can; carbonic anhydrase [EC:4.2.1.1]	GO:0004089,GO:0008270	carbonate dehydratase activity,zinc ion binding
Npp.03C022140.1																Zm00008a036751_P01
Npp.03C022150.1	AT2G15480.1			GO:0008152,GO:0016758	metabolic process,transferase activity, transferring hexosyl groups	LOC_Os01g45110.1			GO:0008152,GO:0016758	metabolic process,transferase activity, transferring hexosyl groups	Sobic.003G232900.1.p			GO:0008152,GO:0016758	metabolic process,transferase activity, transferring hexosyl groups	Zm00008a014332_P01			GO:0008152,GO:0016758	metabolic process,transferase activity, transferring hexosyl groups
Npp.03C022160.1	AT2G15490.1			GO:0008152,GO:0016758	metabolic process,transferase activity, transferring hexosyl groups	LOC_Os01g45110.1			GO:0008152,GO:0016758	metabolic process,transferase activity, transferring hexosyl groups	Sobic.003G233000.1.p			GO:0008152,GO:0016758	metabolic process,transferase activity, transferring hexosyl groups	Zm00008a014332_P01			GO:0008152,GO:0016758	metabolic process,transferase activity, transferring hexosyl groups
Npp.03C024550.1						LOC_Os01g49560.1					Sobic.003G263001.1.p			GO:0004672,GO:0006468,GO:0030247	protein kinase activity,protein phosphorylation,polysaccharide binding	Zm00008a032303_P01			GO:0004672,GO:0006468	protein kinase activity,protein phosphorylation
Npp.03C024560.1	AT1G18390.2			GO:0004672,GO:0006468,GO:0030247	protein kinase activity,protein phosphorylation,polysaccharide binding	LOC_Os01g49614.1			GO:0004672,GO:0004674,GO:0004713,GO:0005524,GO:0006468	protein kinase activity,protein serine/threonine kinase activity,protein tyrosine kinase activity,ATP binding,protein phosphorylation	Sobic.003G262600.3.p			GO:0004672,GO:0005524,GO:0006468	protein kinase activity,ATP binding,protein phosphorylation	Zm00008a032303_P01			GO:0004672,GO:0006468	protein kinase activity,protein phosphorylation
Npp.03C024570.1	AT1G67000.1			GO:0004672,GO:0006468	protein kinase activity,protein phosphorylation	LOC_Os01g49614.1			GO:0004672,GO:0004674,GO:0004713,GO:0005524,GO:0006468	protein kinase activity,protein serine/threonine kinase activity,protein tyrosine kinase activity,ATP binding,protein phosphorylation	Sobic.003G263300.1.p			GO:0004672,GO:0006468	protein kinase activity,protein phosphorylation	Zm00008a032303_P01			GO:0004672,GO:0006468	protein kinase activity,protein phosphorylation
Npp.03C024600.1	AT1G18390.2			GO:0004672,GO:0006468,GO:0030247	protein kinase activity,protein phosphorylation,polysaccharide binding	LOC_Os01g49580.1			GO:0004672,GO:0004674,GO:0004713,GO:0005524,GO:0006468	protein kinase activity,protein serine/threonine kinase activity,protein tyrosine kinase activity,ATP binding,protein phosphorylation	Sobic.003G262700.1.p					Zm00008a014101_P01			GO:0030247	polysaccharide binding
Npp.03C030060.1	AT4G03240.1	K19054	FXN; frataxin [EC:1.16.3.1]	GO:0008199,GO:0016226	ferric iron binding,iron-sulfur cluster assembly	LOC_Os01g57460.1			GO:0004322,GO:0005739,GO:0008199,GO:0016226,GO:0055114	ferroxidase activity,mitochondrion,ferric iron binding,iron-sulfur cluster assembly,obsolete oxidation-reduction process	Sobic.003G319100.1.p	K19054	FXN; frataxin [EC:1.16.3.1]	GO:0008199,GO:0016226	ferric iron binding,iron-sulfur cluster assembly	Zm00008a013653_P01	K19054	FXN; frataxin [EC:1.16.3.1]	GO:0008199,GO:0016226	ferric iron binding,iron-sulfur cluster assembly
Npp.03C030070.1	AT5G54490.1					LOC_Os01g57470.1			GO:0005509	calcium ion binding	Sobic.003G319200.1.p					Zm00008a003207_P01
Npp.03C032750.1	AT3G58090.1					LOC_Os01g61890.1			GO:0003677	DNA binding	Sobic.003G347560.1.p			GO:0003677	DNA binding	Zm00008a013398_P01
Npp.03C032760.1	AT5G41380.1			GO:0005515	protein binding	LOC_Os01g61900.1			GO:0005515	protein binding	Sobic.003G347680.1.p			GO:0005515	protein binding	Zm00008a013395_P01			GO:0005515	protein binding
Npp.03C032770.1	AT1G09720.1					LOC_Os01g61910.1					Sobic.003G347800.1.p					Zm00008a032956_P01
Npp.03C033080.1	AT5G02250.1					LOC_Os01g62440.1					Sobic.003G352500.1.p					Zm00008a013351_P01
Npp.03C033090.1						LOC_Os03g52960.1					Sobic.008G184300.1.p
Npp.03C033230.1											Sobic.003G353900.1.p
Npp.03C033240.1	AT2G29380.1	K14497	PP2C; protein phosphatase 2C [EC:3.1.3.16]	GO:0004722,GO:0006470	protein serine/threonine phosphatase activity,protein dephosphorylation	LOC_Os01g62760.1	K14497	PP2C; protein phosphatase 2C [EC:3.1.3.16]	GO:0003824,GO:0004722,GO:0006470	catalytic activity,protein serine/threonine phosphatase activity,protein dephosphorylation	Sobic.003G354000.1.p	K14497	PP2C; protein phosphatase 2C [EC:3.1.3.16]	GO:0003824,GO:0004722,GO:0006470	catalytic activity,protein serine/threonine phosphatase activity,protein dephosphorylation	Zm00008a013339_P01	K14497	PP2C; protein phosphatase 2C [EC:3.1.3.16]	GO:0003824,GO:0004722,GO:0006470	catalytic activity,protein serine/threonine phosphatase activity,protein dephosphorylation
Npp.03C037480.1	AT2G24700.1			GO:0003677	DNA binding	LOC_Os01g67830.1			GO:0003677	DNA binding	Sobic.003G393600.3.p			GO:0003677	DNA binding	Zm00008a013014_P01			GO:0003677	DNA binding
Npp.03C037490.1	AT5G50380.1	K07195	EXOC7, EXO70; exocyst complex component 7	GO:0000145,GO:0006887	exocyst,exocytosis	LOC_Os01g67820.1	K07195	EXOC7, EXO70; exocyst complex component 7	GO:0000145,GO:0006887	exocyst,exocytosis	Sobic.003G393500.1.p			GO:0000145,GO:0006887	exocyst,exocytosis	Zm00008a013015_P01			GO:0000145,GO:0006887	exocyst,exocytosis
Npp.03C037500.1	AT5G50380.1	K07195	EXOC7, EXO70; exocyst complex component 7	GO:0000145,GO:0006887	exocyst,exocytosis	LOC_Os01g67820.1	K07195	EXOC7, EXO70; exocyst complex component 7	GO:0000145,GO:0006887	exocyst,exocytosis	Sobic.003G393400.2.p			GO:0000145,GO:0006887	exocyst,exocytosis	Zm00008a013015_P01			GO:0000145,GO:0006887	exocyst,exocytosis
Npp.03C038580.1	AT3G23230.1			GO:0003700,GO:0006355	DNA-binding transcription factor activity,regulation of transcription, DNA-templated	LOC_Os03g05590.1			GO:0003700,GO:0006355	DNA-binding transcription factor activity,regulation of transcription, DNA-templated	Sobic.001G234500.1.p			GO:0003700,GO:0006355	DNA-binding transcription factor activity,regulation of transcription, DNA-templated	Zm00008a020087_P01			GO:0003700,GO:0006355	DNA-binding transcription factor activity,regulation of transcription, DNA-templated
Npp.03C038880.1											Sobic.004G172000.1.p
Npp.03C038890.1						LOC_Os07g35960.1					Sobic.005G008001.1.p					Zm00008a001555_P01
Npp.03C038910.1	AT5G59560.1					LOC_Os05g02690.1					Sobic.003G402200.2.p					Zm00008a040126_P01
Npp.03C039010.1	AT3G08040.1			GO:0006855,GO:0015238,GO:0015297,GO:0016020,GO:0055085	drug transmembrane transport,,antiporter activity,membrane,transmembrane transport	LOC_Os03g11734.2			GO:0006855,GO:0015238,GO:0015297,GO:0016020,GO:0055085	drug transmembrane transport,,antiporter activity,membrane,transmembrane transport	Sobic.003G403000.1.p			GO:0006855,GO:0015238,GO:0015297,GO:0016020,GO:0055085	drug transmembrane transport,,antiporter activity,membrane,transmembrane transport	Zm00008a000777_P01			GO:0006855,GO:0015238,GO:0015297,GO:0016020,GO:0055085	drug transmembrane transport,,antiporter activity,membrane,transmembrane transport
Npp.03C039020.1	AT1G04920.1	K00696	E2.4.1.14; sucrose-phosphate synthase [EC:2.4.1.14]	GO:0005985,GO:0016157	sucrose metabolic process,sucrose synthase activity	LOC_Os01g69030.4	K00696	E2.4.1.14; sucrose-phosphate synthase [EC:2.4.1.14]	GO:0005985,GO:0009058,GO:0046524	sucrose metabolic process,biosynthetic process,sucrose-phosphate synthase activity	Sobic.003G403300.1.p	K00696	E2.4.1.14; sucrose-phosphate synthase [EC:2.4.1.14]	GO:0005985,GO:0016157	sucrose metabolic process,sucrose synthase activity	Zm00008a032643_P01	K00696	E2.4.1.14; sucrose-phosphate synthase [EC:2.4.1.14]	GO:0005985,GO:0016157	sucrose metabolic process,sucrose synthase activity
Npp.03C039350.1						LOC_Os05g18970.1					Sobic.004G338701.1.p					Zm00008a039107_P01			GO:0003676,GO:0008270	nucleic acid binding,zinc ion binding
Npp.03C039380.1	AT5G53150.1					LOC_Os01g69930.1					Sobic.003G407700.1.p					Zm00008a032606_P01
Npp.03C039390.1	AT3G05060.1	K14565	NOP58; nucleolar protein 58			LOC_Os03g22730.1	K14565	NOP58; nucleolar protein 58			Sobic.003G407800.1.p	K14565	NOP58; nucleolar protein 58			Zm00008a001482_P01	K14565	NOP58; nucleolar protein 58
Npp.03C039410.1	AT1G27340.1			GO:0005515	protein binding	LOC_Os01g69940.1			GO:0005515	protein binding	Sobic.003G407900.1.p			GO:0005515	protein binding	Zm00008a012892_P01			GO:0005515	protein binding
Npp.03C041160.1	AT2G05642.1					LOC_Os01g73070.2					Sobic.004G230300.1.p	K07466	RFA1, RPA1, rpa; replication factor A1			Zm00008a004135_P01
Npp.03C041170.1	AT1G24620.1	K13448	CML; calcium-binding protein CML			LOC_Os01g72100.1			GO:0005509	calcium ion binding	Sobic.003G425500.1.p	K13448	CML; calcium-binding protein CML			Zm00008a012738_P01	K13448	CML; calcium-binding protein CML
Npp.03C041460.1	AT1G09560.1					LOC_Os03g44880.1			GO:0030145,GO:0045735	manganese ion binding,nutrient reservoir activity	Sobic.003G427700.1.p					Zm00008a032492_P01
Npp.03C041480.1	AT1G48120.1			GO:0016787	hydrolase activity	LOC_Os03g24630.1
Npp.03C041490.1	AT3G62020.1					LOC_Os01g72300.1			GO:0030145,GO:0045735	manganese ion binding,nutrient reservoir activity	Sobic.003G427900.1.p					Zm00008a032492_P01
Npp.03C041500.1						LOC_Os04g46980.1			GO:0008152,GO:0016758	metabolic process,transferase activity, transferring hexosyl groups	Sobic.006G174500.1.p	K13495	CISZOG; cis-zeatin O-glucosyltransferase [EC:2.4.1.215]	GO:0008152,GO:0016758	metabolic process,transferase activity, transferring hexosyl groups
Npp.04A000090.1	AT2G26640.1	K15397	KCS; 3-ketoacyl-CoA synthase [EC:2.3.1.199]	GO:0006633,GO:0008610,GO:0016020,GO:0016747	fatty acid biosynthetic process,lipid biosynthetic process,membrane,transferase activity, transferring acyl groups other than amino-acyl groups	LOC_Os10g28060.1			GO:0003824,GO:0006633,GO:0008152,GO:0008610,GO:0016020,GO:0016747	catalytic activity,fatty acid biosynthetic process,metabolic process,lipid biosynthetic process,membrane,transferase activity, transferring acyl groups other than amino-acyl groups	Sobic.001G247700.1.p	K15397	KCS; 3-ketoacyl-CoA synthase [EC:2.3.1.199]	GO:0006633,GO:0008610,GO:0016020,GO:0016747	fatty acid biosynthetic process,lipid biosynthetic process,membrane,transferase activity, transferring acyl groups other than amino-acyl groups	Zm00008a020130_P01	K15397	KCS; 3-ketoacyl-CoA synthase [EC:2.3.1.199]	GO:0006633,GO:0008610,GO:0016020,GO:0016747	fatty acid biosynthetic process,lipid biosynthetic process,membrane,transferase activity, transferring acyl groups other than amino-acyl groups
Npp.04A000400.1	AT1G22370.2			GO:0008152,GO:0016758	metabolic process,transferase activity, transferring hexosyl groups	LOC_Os02g51910.1			GO:0008152,GO:0016758	metabolic process,transferase activity, transferring hexosyl groups	Sobic.004G230200.1.p			GO:0008152,GO:0016758	metabolic process,transferase activity, transferring hexosyl groups	Zm00008a017578_P01			GO:0008152,GO:0016758	metabolic process,transferase activity, transferring hexosyl groups
Npp.04A002000.1	AT1G08060.1					LOC_Os02g02050.1			GO:0003676,GO:0003677,GO:0004386,GO:0005524	nucleic acid binding,DNA binding,helicase activity,ATP binding	Sobic.004G007900.1.p	K11643	CHD4, MI2B; chromodomain-helicase-DNA-binding protein 4 [EC:3.6.4.12]			Zm00008a020731_P01	K11643	CHD4, MI2B; chromodomain-helicase-DNA-binding protein 4 [EC:3.6.4.12]
Npp.04A002010.1	AT5G14850.1	K05286	PIGB; GPI mannosyltransferase 3 [EC:2.4.1.-]	GO:0016757	transferase activity, transferring glycosyl groups	LOC_Os01g39810.1	K05286	PIGB; GPI mannosyltransferase 3 [EC:2.4.1.-]	GO:0016757	transferase activity, transferring glycosyl groups	Sobic.009G194000.1.p	K05286	PIGB; GPI mannosyltransferase 3 [EC:2.4.1.-]	GO:0016757	transferase activity, transferring glycosyl groups	Zm00008a020732_P01	K05286	PIGB; GPI mannosyltransferase 3 [EC:2.4.1.-]	GO:0016757	transferase activity, transferring glycosyl groups
Npp.04A002020.1	AT1G21240.1			GO:0004672,GO:0005509,GO:0006468,GO:0030247	protein kinase activity,calcium ion binding,protein phosphorylation,polysaccharide binding	LOC_Os02g02120.1			GO:0004672,GO:0004674,GO:0004713,GO:0005509,GO:0005524,GO:0006468	protein kinase activity,protein serine/threonine kinase activity,protein tyrosine kinase activity,calcium ion binding,ATP binding,protein phosphorylation	Sobic.004G008100.1.p			GO:0004672,GO:0005509,GO:0005524,GO:0006468,GO:0030247	protein kinase activity,calcium ion binding,ATP binding,protein phosphorylation,polysaccharide binding	Zm00008a023297_P01			GO:0004672,GO:0006468,GO:0030247	protein kinase activity,protein phosphorylation,polysaccharide binding
Npp.04A002170.1	AT1G08090.1	K02575	NRT, narK, nrtP, nasA; MFS transporter, NNP family, nitrate/nitrite transporter	GO:0016021,GO:0055085	integral component of membrane,transmembrane transport	LOC_Os02g02170.1			GO:0016021,GO:0055085	integral component of membrane,transmembrane transport	Sobic.004G009500.1.p	K02575	NRT, narK, nrtP, nasA; MFS transporter, NNP family, nitrate/nitrite transporter	GO:0016021,GO:0055085	integral component of membrane,transmembrane transport	Zm00008a018912_P01	K02575	NRT, narK, nrtP, nasA; MFS transporter, NNP family, nitrate/nitrite transporter	GO:0016021,GO:0055085	integral component of membrane,transmembrane transport
Npp.04A002740.1						LOC_Os08g04590.1					Sobic.004G014900.1.p					Zm00008a038895_P01
Npp.04A004090.1						LOC_Os02g02900.1					Sobic.004G018500.1.p
Npp.04A012210.1	AT5G25930.1	K00924	E2.7.1.-; kinase [EC:2.7.1.-]	GO:0004672,GO:0005515,GO:0005524,GO:0006468	protein kinase activity,protein binding,ATP binding,protein phosphorylation	LOC_Os02g13510.1	K00924	E2.7.1.-; kinase [EC:2.7.1.-]	GO:0004672,GO:0004674,GO:0004713,GO:0005515,GO:0005524,GO:0006468	protein kinase activity,protein serine/threonine kinase activity,protein tyrosine kinase activity,protein binding,ATP binding,protein phosphorylation	Sobic.004G099700.1.p			GO:0004672,GO:0005515,GO:0005524,GO:0006468	protein kinase activity,protein binding,ATP binding,protein phosphorylation	Zm00008a018457_P01			GO:0004672,GO:0005515,GO:0006468	protein kinase activity,protein binding,protein phosphorylation
Npp.04A014820.1	AT5G44950.1			GO:0005515	protein binding	LOC_Os12g31340.1			GO:0005515	protein binding	Sobic.004G118300.2.p					Zm00008a027235_P01
Npp.04A014830.1	AT4G11220.1					LOC_Os02g16620.1					Sobic.004G118200.3.p					Zm00008a021468_P01
Npp.04A014840.1	AT4G11220.1					LOC_Os02g16620.1					Sobic.004G118200.3.p					Zm00008a021468_P01
Npp.04A014870.1	AT2G29120.1			GO:0004970,GO:0016020	ionotropic glutamate receptor activity,membrane	LOC_Os09g25980.1			GO:0004930,GO:0004970,GO:0005215,GO:0005234,GO:0006810,GO:0007186,GO:0016020,GO:0016021	G protein-coupled receptor activity,ionotropic glutamate receptor activity,transporter activity,extracellularly glutamate-gated ion channel activity,transport,G protein-coupled receptor signaling pathway,membrane,integral component of membrane	Sobic.004G118000.2.p	K05387	GRIP; glutamate receptor, ionotropic, plant	GO:0004970,GO:0016020	ionotropic glutamate receptor activity,membrane	Zm00008a028132_P01	K05387	GRIP; glutamate receptor, ionotropic, plant	GO:0004970,GO:0016020	ionotropic glutamate receptor activity,membrane
Npp.04A014880.1											Sobic.010G026100.1.p					Zm00008a039445_P01
Npp.04A015340.1	AT4G13240.1			GO:0005089		LOC_Os02g17240.1			GO:0005089		Sobic.004G123100.2.p			GO:0005089		Zm00008a021438_P01			GO:0005089
Npp.04A015350.1	AT5G11510.1					LOC_Os12g13570.1			GO:0003682	chromatin binding	Sobic.004G123200.1.p					Zm00008a010669_P01
Npp.04A015360.1	AT4G29400.1					LOC_Os01g37820.1					Sobic.004G123300.1.p					Zm00008a031948_P01
Npp.04A015560.1	AT2G03220.1	K13681	FUT; xyloglucan fucosyltransferase [EC:2.4.1.-]	GO:0008107,GO:0016020,GO:0042546	galactoside 2-alpha-L-fucosyltransferase activity,membrane,cell wall biogenesis	LOC_Os02g17534.1	K13681	FUT; xyloglucan fucosyltransferase [EC:2.4.1.-]	GO:0008107,GO:0016020,GO:0042546	galactoside 2-alpha-L-fucosyltransferase activity,membrane,cell wall biogenesis	Sobic.004G125300.1.p	K13681	FUT; xyloglucan fucosyltransferase [EC:2.4.1.-]	GO:0008107,GO:0016020,GO:0042546	galactoside 2-alpha-L-fucosyltransferase activity,membrane,cell wall biogenesis	Zm00008a018395_P01	K13681	FUT; xyloglucan fucosyltransferase [EC:2.4.1.-]	GO:0008107,GO:0016020,GO:0042546	galactoside 2-alpha-L-fucosyltransferase activity,membrane,cell wall biogenesis
Npp.04A015590.1	AT2G03220.1	K13681	FUT; xyloglucan fucosyltransferase [EC:2.4.1.-]	GO:0008107,GO:0016020,GO:0042546	galactoside 2-alpha-L-fucosyltransferase activity,membrane,cell wall biogenesis	LOC_Os02g17534.1	K13681	FUT; xyloglucan fucosyltransferase [EC:2.4.1.-]	GO:0008107,GO:0016020,GO:0042546	galactoside 2-alpha-L-fucosyltransferase activity,membrane,cell wall biogenesis	Sobic.004G124800.1.p	K13681	FUT; xyloglucan fucosyltransferase [EC:2.4.1.-]	GO:0008107,GO:0016020,GO:0042546	galactoside 2-alpha-L-fucosyltransferase activity,membrane,cell wall biogenesis	Zm00008a018395_P01	K13681	FUT; xyloglucan fucosyltransferase [EC:2.4.1.-]	GO:0008107,GO:0016020,GO:0042546	galactoside 2-alpha-L-fucosyltransferase activity,membrane,cell wall biogenesis
Npp.04A015600.1	AT2G03220.1	K13681	FUT; xyloglucan fucosyltransferase [EC:2.4.1.-]	GO:0008107,GO:0016020,GO:0042546	galactoside 2-alpha-L-fucosyltransferase activity,membrane,cell wall biogenesis	LOC_Os02g17534.1	K13681	FUT; xyloglucan fucosyltransferase [EC:2.4.1.-]	GO:0008107,GO:0016020,GO:0042546	galactoside 2-alpha-L-fucosyltransferase activity,membrane,cell wall biogenesis	Sobic.004G124800.1.p	K13681	FUT; xyloglucan fucosyltransferase [EC:2.4.1.-]	GO:0008107,GO:0016020,GO:0042546	galactoside 2-alpha-L-fucosyltransferase activity,membrane,cell wall biogenesis	Zm00008a018395_P01	K13681	FUT; xyloglucan fucosyltransferase [EC:2.4.1.-]	GO:0008107,GO:0016020,GO:0042546	galactoside 2-alpha-L-fucosyltransferase activity,membrane,cell wall biogenesis
Npp.04A015610.1	AT2G03220.1	K13681	FUT; xyloglucan fucosyltransferase [EC:2.4.1.-]	GO:0008107,GO:0016020,GO:0042546	galactoside 2-alpha-L-fucosyltransferase activity,membrane,cell wall biogenesis	LOC_Os02g17534.1	K13681	FUT; xyloglucan fucosyltransferase [EC:2.4.1.-]	GO:0008107,GO:0016020,GO:0042546	galactoside 2-alpha-L-fucosyltransferase activity,membrane,cell wall biogenesis	Sobic.004G125300.1.p	K13681	FUT; xyloglucan fucosyltransferase [EC:2.4.1.-]	GO:0008107,GO:0016020,GO:0042546	galactoside 2-alpha-L-fucosyltransferase activity,membrane,cell wall biogenesis	Zm00008a018395_P01	K13681	FUT; xyloglucan fucosyltransferase [EC:2.4.1.-]	GO:0008107,GO:0016020,GO:0042546	galactoside 2-alpha-L-fucosyltransferase activity,membrane,cell wall biogenesis
Npp.04A016530.1	AT4G10850.1	K15382	SLC50A, SWEET; solute carrier family 50 (sugar transporter)			LOC_Os02g19820.1			GO:0016021	integral component of membrane	Sobic.004G133600.2.p					Zm00008a021370_P01	K15382	SLC50A, SWEET; solute carrier family 50 (sugar transporter)
Npp.04A016540.1											Sobic.010G125900.1.p
Npp.04A016600.1																Zm00008a039134_P01
Npp.04A016610.1	ATMG00820.1															Zm00008a039350_P01			GO:0015074	DNA integration
Npp.04A016650.1	AT5G40740.1			GO:0051225,GO:0051297,GO:0070652	spindle assembly,,HAUS complex	LOC_Os02g22370.1					Sobic.004G135400.1.p			GO:0051225,GO:0051297,GO:0070652	spindle assembly,,HAUS complex	Zm00008a021226_P01			GO:0051225,GO:0051297,GO:0070652	spindle assembly,,HAUS complex
Npp.04A021240.1	AT1G61690.1			GO:0046872	metal ion binding	LOC_Os03g46710.1			GO:0005515,GO:0046872	protein binding,metal ion binding	Sobic.004G196700.1.p			GO:0046872	metal ion binding	Zm00008a022171_P01			GO:0046872	metal ion binding
Npp.04A021250.1	AT3G14110.3					LOC_Os02g37470.1			GO:0005515	protein binding	Sobic.004G196800.1.p					Zm00008a022173_P01
Npp.04A021330.1	AT1G77760.1	K10534	NR; nitrate reductase (NAD(P)H) [EC:1.7.1.1 1.7.1.2 1.7.1.3]	GO:0016491,GO:0030151,GO:0042128,GO:0055114	oxidoreductase activity,molybdenum ion binding,nitrate assimilation,obsolete oxidation-reduction process	LOC_Os08g36480.1	K00360	nasB; assimilatory nitrate reductase electron transfer subunit [EC:1.7.99.-]	GO:0009055,GO:0016491,GO:0020037,GO:0030151,GO:0043546,GO:0046872,GO:0055114	electron transfer activity,oxidoreductase activity,heme binding,molybdenum ion binding,molybdopterin cofactor binding,metal ion binding,obsolete oxidation-reduction process	Sobic.004G196101.1.p	K10534	NR; nitrate reductase (NAD(P)H) [EC:1.7.1.1 1.7.1.2 1.7.1.3]	GO:0016491,GO:0030151,GO:0042128,GO:0055114	oxidoreductase activity,molybdenum ion binding,nitrate assimilation,obsolete oxidation-reduction process	Zm00008a022169_P01	K10534	NR; nitrate reductase (NAD(P)H) [EC:1.7.1.1 1.7.1.2 1.7.1.3]	GO:0016491,GO:0030151,GO:0042128,GO:0055114	oxidoreductase activity,molybdenum ion binding,nitrate assimilation,obsolete oxidation-reduction process
Npp.04A021340.1	AT3G50660.1	K09587	CYP90B1, DWF4; steroid 22-alpha-hydroxylase [EC:1.14.13.-]	GO:0005506,GO:0016705,GO:0020037,GO:0055114	iron ion binding,oxidoreductase activity, acting on paired donors, with incorporation or reduction of molecular oxygen,heme binding,obsolete oxidation-reduction process	LOC_Os04g39430.1	K09587	CYP90B1, DWF4; steroid 22-alpha-hydroxylase [EC:1.14.13.-]	GO:0005506,GO:0006826,GO:0006879,GO:0008199,GO:0016705,GO:0020037,GO:0055114	iron ion binding,iron ion transport,cellular iron ion homeostasis,ferric iron binding,oxidoreductase activity, acting on paired donors, with incorporation or reduction of molecular oxygen,heme binding,obsolete oxidation-reduction process	Sobic.006G114600.1.p	K12639	CYP724B1, D11; cytochrome P450 family 724 subfamily B1 [EC:1.14.13.-]	GO:0005506,GO:0016705,GO:0020037,GO:0055114	iron ion binding,oxidoreductase activity, acting on paired donors, with incorporation or reduction of molecular oxygen,heme binding,obsolete oxidation-reduction process	Zm00008a007127_P01	K12639	CYP724B1, D11; cytochrome P450 family 724 subfamily B1 [EC:1.14.13.-]	GO:0005506,GO:0016705,GO:0020037,GO:0055114	iron ion binding,oxidoreductase activity, acting on paired donors, with incorporation or reduction of molecular oxygen,heme binding,obsolete oxidation-reduction process
Npp.04A032610.1	AT2G13840.1	K07053	E3.1.3.97; 3',5'-nucleoside bisphosphate phosphatase [EC:3.1.3.97]	GO:0003824	catalytic activity	LOC_Os02g51660.1	K07053	E3.1.3.97; 3',5'-nucleoside bisphosphate phosphatase [EC:3.1.3.97]	GO:0003677,GO:0003824,GO:0003887,GO:0006260	DNA binding,catalytic activity,DNA-directed DNA polymerase activity,DNA replication	Sobic.004G233500.1.p	K07053	E3.1.3.97; 3',5'-nucleoside bisphosphate phosphatase [EC:3.1.3.97]	GO:0003824	catalytic activity	Zm00008a000616_P01	K07053	E3.1.3.97; 3',5'-nucleoside bisphosphate phosphatase [EC:3.1.3.97]
Npp.04A032860.1	AT4G38180.1			GO:0006355,GO:0008270	regulation of transcription, DNA-templated,zinc ion binding	LOC_Os10g06860.1					Sobic.002G397650.1.p			GO:0006355	regulation of transcription, DNA-templated	Zm00008a022278_P01			GO:0006355,GO:0008270	regulation of transcription, DNA-templated,zinc ion binding
Npp.04A032870.1	AT4G38180.1			GO:0006355,GO:0008270	regulation of transcription, DNA-templated,zinc ion binding	LOC_Os12g24810.1					Sobic.003G198000.2.p			GO:0006355,GO:0008270	regulation of transcription, DNA-templated,zinc ion binding	Zm00008a022278_P01			GO:0006355,GO:0008270	regulation of transcription, DNA-templated,zinc ion binding
Npp.04A032880.1						LOC_Os08g27759.1					Sobic.001G243901.1.p					Zm00008a004915_P01			GO:0006508,GO:0008234	proteolysis,cysteine-type peptidase activity
Npp.04A033090.1	AT1G72210.1			GO:0046983	protein dimerization activity	LOC_Os02g52190.1			GO:0046983	protein dimerization activity	Sobic.004G228400.1.p			GO:0046983	protein dimerization activity	Zm00008a017562_P01			GO:0046983	protein dimerization activity
Npp.04A035570.1	AT1G71820.2	K06110	EXOC3, SEC6; exocyst complex component 3	GO:0000145,GO:0006887	exocyst,exocytosis	LOC_Os02g51430.1			GO:0000145,GO:0006887	exocyst,exocytosis	Sobic.004G236200.1.p	K06110	EXOC3, SEC6; exocyst complex component 3	GO:0000145,GO:0006887	exocyst,exocytosis	Zm00008a023004_P01	K06110	EXOC3, SEC6; exocyst complex component 3	GO:0000145,GO:0006887	exocyst,exocytosis
Npp.05D000430.1	AT5G48930.1	K13065	E2.3.1.133, HCT; shikimate O-hydroxycinnamoyltransferase [EC:2.3.1.133]	GO:0016747	transferase activity, transferring acyl groups other than amino-acyl groups	LOC_Os09g37180.1	K13065	E2.3.1.133, HCT; shikimate O-hydroxycinnamoyltransferase [EC:2.3.1.133]	GO:0016747	transferase activity, transferring acyl groups other than amino-acyl groups	Sobic.002G283000.1.p			GO:0016747	transferase activity, transferring acyl groups other than amino-acyl groups	Zm00008a039776_P01			GO:0016747	transferase activity, transferring acyl groups other than amino-acyl groups
Npp.05D000440.1											Sobic.002G080900.1.p					Zm00008a039258_P01
Npp.05D013200.1	AT1G04910.1					LOC_Os11g29120.1					Sobic.005G114500.2.p					Zm00008a015318_P01
Npp.05D013290.1	AT5G63460.4					LOC_Os12g25640.1			GO:0003676	nucleic acid binding	Sobic.005G108801.1.p					Zm00008a015305_P01
Npp.05D013410.1						LOC_Os10g38890.1					Sobic.004G066401.1.p					Zm00008a012973_P01
Npp.05D013420.1	AT5G13930.1	K00660	CHS; chalcone synthase [EC:2.3.1.74]	GO:0008610,GO:0016747	lipid biosynthetic process,transferase activity, transferring acyl groups other than amino-acyl groups	LOC_Os11g32610.1	K00660	CHS; chalcone synthase [EC:2.3.1.74]	GO:0003824,GO:0008152,GO:0009058,GO:0016746	catalytic activity,metabolic process,biosynthetic process,transferase activity, transferring acyl groups	Sobic.002G310500.1.p			GO:0008610,GO:0016747	lipid biosynthetic process,transferase activity, transferring acyl groups other than amino-acyl groups	Zm00008a010376_P01			GO:0004315,GO:0006633,GO:0008610,GO:0016747	3-oxoacyl-[acyl-carrier-protein] synthase activity,fatty acid biosynthetic process,lipid biosynthetic process,transferase activity, transferring acyl groups other than amino-acyl groups
Npp.05D013430.1	AT4G35160.1			GO:0008171,GO:0046983	O-methyltransferase activity,protein dimerization activity	LOC_Os06g16960.1			GO:0008171,GO:0046983	O-methyltransferase activity,protein dimerization activity	Sobic.007G170500.1.p			GO:0008171,GO:0046983	O-methyltransferase activity,protein dimerization activity	Zm00008a026186_P01			GO:0008171,GO:0046983	O-methyltransferase activity,protein dimerization activity
Npp.05D013440.1	AT1G03670.1					LOC_Os11g24780.1			GO:0005515	protein binding	Sobic.005G115300.1.p					Zm00008a008146_P01
Npp.05D013620.1						LOC_Os05g44120.1					Sobic.005G118700.1.p
Npp.05D013630.1	AT3G14470.1			GO:0005515,GO:0043531	protein binding,ADP binding	LOC_Os11g10550.1			GO:0005515,GO:0006952,GO:0043531	protein binding,defense response,ADP binding	Sobic.005G118800.1.p					Zm00008a018270_P01
Npp.05D015880.1																Zm00008a039107_P01			GO:0003676,GO:0008270	nucleic acid binding,zinc ion binding
Npp.05D018200.1	AT1G53140.1					LOC_Os01g54420.1			GO:0003924,GO:0005525	GTPase activity,GTP binding	Sobic.003G294500.1.p					Zm00008a013815_P01
Npp.05D018210.1	AT5G22220.2	K06620	E2F3; transcription factor E2F3	GO:0003700,GO:0005667,GO:0006355	DNA-binding transcription factor activity,transcription regulator complex,regulation of transcription, DNA-templated	LOC_Os12g06200.1			GO:0003700,GO:0005667,GO:0006355	DNA-binding transcription factor activity,transcription regulator complex,regulation of transcription, DNA-templated	Sobic.006G008800.1.p	K06620	E2F3; transcription factor E2F3	GO:0003700,GO:0005667,GO:0006355	DNA-binding transcription factor activity,transcription regulator complex,regulation of transcription, DNA-templated	Zm00008a007992_P01	K06620	E2F3; transcription factor E2F3	GO:0003700,GO:0005667,GO:0006355	DNA-binding transcription factor activity,transcription regulator complex,regulation of transcription, DNA-templated
Npp.05D022690.1	AT2G47870.1	K03676	grxC, GLRX, GLRX2; glutaredoxin 3	GO:0009055,GO:0015035,GO:0045454	electron transfer activity,protein disulfide oxidoreductase activity,cell redox homeostasis	LOC_Os11g43520.1			GO:0009055,GO:0015035,GO:0045454	electron transfer activity,protein disulfide oxidoreductase activity,cell redox homeostasis	Sobic.005G204000.1.p	K03676	grxC, GLRX, GLRX2; glutaredoxin 3	GO:0009055,GO:0015035,GO:0045454	electron transfer activity,protein disulfide oxidoreductase activity,cell redox homeostasis	Zm00008a014950_P01	K03676	grxC, GLRX, GLRX2; glutaredoxin 3	GO:0009055,GO:0015035,GO:0045454	electron transfer activity,protein disulfide oxidoreductase activity,cell redox homeostasis
Npp.05D024590.1																Zm00008a039134_P01
Npp.05D024600.1	AT3G16770.1	K09286	EREBP; EREBP-like factor	GO:0003700,GO:0006355	DNA-binding transcription factor activity,regulation of transcription, DNA-templated	LOC_Os06g09390.1	K09286	EREBP; EREBP-like factor	GO:0003700,GO:0006355	DNA-binding transcription factor activity,regulation of transcription, DNA-templated	Sobic.001G481300.1.p			GO:0003700,GO:0006355	DNA-binding transcription factor activity,regulation of transcription, DNA-templated	Zm00008a025603_P01			GO:0003700,GO:0006355	DNA-binding transcription factor activity,regulation of transcription, DNA-templated
Npp.05D024640.1	AT2G22850.1			GO:0003700,GO:0006355,GO:0043565	DNA-binding transcription factor activity,regulation of transcription, DNA-templated,sequence-specific DNA binding	LOC_Os12g37415.1			GO:0003700,GO:0006355,GO:0043565	DNA-binding transcription factor activity,regulation of transcription, DNA-templated,sequence-specific DNA binding	Sobic.001G075900.1.p			GO:0003700,GO:0006355,GO:0043565	DNA-binding transcription factor activity,regulation of transcription, DNA-templated,sequence-specific DNA binding	Zm00008a039035_P01
Npp.05D024650.1	AT1G72360.2			GO:0003700,GO:0006355	DNA-binding transcription factor activity,regulation of transcription, DNA-templated	LOC_Os02g54160.2			GO:0003700,GO:0006355	DNA-binding transcription factor activity,regulation of transcription, DNA-templated	Sobic.001G481300.1.p			GO:0003700,GO:0006355	DNA-binding transcription factor activity,regulation of transcription, DNA-templated	Zm00008a000540_P01			GO:0003700,GO:0006355	DNA-binding transcription factor activity,regulation of transcription, DNA-templated
Npp.05D024720.1	AT4G37340.1	K00517	CYP81F; indol-3-yl-methylglucosinolate hydroxylase [EC:1.14.-.-]	GO:0005506,GO:0016705,GO:0020037,GO:0055114	iron ion binding,oxidoreductase activity, acting on paired donors, with incorporation or reduction of molecular oxygen,heme binding,obsolete oxidation-reduction process	LOC_Os12g39300.1	K00517	CYP81F; indol-3-yl-methylglucosinolate hydroxylase [EC:1.14.-.-]	GO:0005506,GO:0016705,GO:0020037,GO:0055114	iron ion binding,oxidoreductase activity, acting on paired donors, with incorporation or reduction of molecular oxygen,heme binding,obsolete oxidation-reduction process	Sobic.008G144300.1.p			GO:0005506,GO:0016705,GO:0020037,GO:0055114	iron ion binding,oxidoreductase activity, acting on paired donors, with incorporation or reduction of molecular oxygen,heme binding,obsolete oxidation-reduction process	Zm00008a002785_P01			GO:0005506,GO:0016705,GO:0020037,GO:0055114	iron ion binding,oxidoreductase activity, acting on paired donors, with incorporation or reduction of molecular oxygen,heme binding,obsolete oxidation-reduction process
Npp.05D024780.1	AT1G50180.1			GO:0043531	ADP binding	LOC_Os05g15040.1			GO:0005515,GO:0006952,GO:0043531	protein binding,defense response,ADP binding	Sobic.005G226400.1.p			GO:0043531	ADP binding	Zm00008a010522_P01			GO:0043531	ADP binding
Npp.05D024790.1	AT1G49030.1					LOC_Os02g18540.1					Sobic.006G107900.1.p					Zm00008a020942_P01
Npp.05D024800.1	AT1G49030.1					LOC_Os02g18540.1					Sobic.006G107900.1.p					Zm00008a020942_P01
Npp.05D024810.1	AT3G46710.1			GO:0043531	ADP binding	LOC_Os01g24820.1			GO:0006952,GO:0043531	defense response,ADP binding	Sobic.005G076500.2.p			GO:0043531	ADP binding	Zm00008a010524_P01			GO:0043531	ADP binding
Npp.05D025810.1	AT3G55350.1			GO:0016788	hydrolase activity, acting on ester bonds	LOC_Os05g51520.1										Zm00008a014872_P01			GO:0016788	hydrolase activity, acting on ester bonds
Npp.05D025820.1	AT1G19640.1	K08241	E2.1.1.141; jasmonate O-methyltransferase [EC:2.1.1.141]	GO:0008168	methyltransferase activity	LOC_Os06g20790.1			GO:0008168	methyltransferase activity	Sobic.005G226200.1.p	K08241	E2.1.1.141; jasmonate O-methyltransferase [EC:2.1.1.141]	GO:0008168	methyltransferase activity	Zm00008a024253_P01			GO:0008168	methyltransferase activity
Npp.05D025830.1	AT5G04370.2			GO:0008168	methyltransferase activity	LOC_Os06g20920.1			GO:0008168	methyltransferase activity	Sobic.005G226200.1.p	K08241	E2.1.1.141; jasmonate O-methyltransferase [EC:2.1.1.141]	GO:0008168	methyltransferase activity	Zm00008a024253_P01			GO:0008168	methyltransferase activity
Npp.05D025880.1	AT2G28790.1					LOC_Os11g47670.1					Sobic.005G226500.1.p					Zm00008a014871_P01
Npp.05D025900.1	AT4G33565.1			GO:0005515,GO:0008270	protein binding,zinc ion binding	LOC_Os11g47700.1			GO:0005515,GO:0008270,GO:0046872	protein binding,zinc ion binding,metal ion binding	Sobic.005G226700.1.p			GO:0005515,GO:0008270	protein binding,zinc ion binding	Zm00008a026233_P01			GO:0005515,GO:0008270	protein binding,zinc ion binding
Npp.05D025910.1	AT2G29140.1	K17943	PUM; pumilio RNA-binding family	GO:0003723	RNA binding	LOC_Os01g74030.1			GO:0003723	RNA binding	Sobic.002G049800.1.p	K17943	PUM; pumilio RNA-binding family	GO:0003723	RNA binding	Zm00008a026907_P01	K17943	PUM; pumilio RNA-binding family	GO:0003723	RNA binding
Npp.05D026080.1	AT3G14470.1			GO:0005515,GO:0043531	protein binding,ADP binding	LOC_Os09g13820.1			GO:0006952,GO:0043531	defense response,ADP binding	Sobic.005G228250.1.p			GO:0043531	ADP binding	Zm00008a037161_P01			GO:0043531	ADP binding
Npp.05D026570.1	AT1G21250.1			GO:0004672,GO:0005509,GO:0006468,GO:0030247	protein kinase activity,calcium ion binding,protein phosphorylation,polysaccharide binding	LOC_Os11g47140.1			GO:0004672,GO:0004674,GO:0004713,GO:0005509,GO:0005515,GO:0005524,GO:0006468	protein kinase activity,protein serine/threonine kinase activity,protein tyrosine kinase activity,calcium ion binding,protein binding,ATP binding,protein phosphorylation	Sobic.005G220300.1.p			GO:0004672,GO:0006468,GO:0030247	protein kinase activity,protein phosphorylation,polysaccharide binding	Zm00008a014882_P01	K04733	IRAK4; interleukin-1 receptor-associated kinase 4 [EC:2.7.11.1]	GO:0004672,GO:0005509,GO:0006468,GO:0030247	protein kinase activity,calcium ion binding,protein phosphorylation,polysaccharide binding
Npp.05D026580.1	AT1G21250.1			GO:0004672,GO:0005509,GO:0006468,GO:0030247	protein kinase activity,calcium ion binding,protein phosphorylation,polysaccharide binding	LOC_Os11g46900.1			GO:0004672,GO:0004674,GO:0004713,GO:0005509,GO:0005515,GO:0005524,GO:0006468	protein kinase activity,protein serine/threonine kinase activity,protein tyrosine kinase activity,calcium ion binding,protein binding,ATP binding,protein phosphorylation	Sobic.005G220300.1.p			GO:0004672,GO:0006468,GO:0030247	protein kinase activity,protein phosphorylation,polysaccharide binding	Zm00008a014882_P01	K04733	IRAK4; interleukin-1 receptor-associated kinase 4 [EC:2.7.11.1]	GO:0004672,GO:0005509,GO:0006468,GO:0030247	protein kinase activity,calcium ion binding,protein phosphorylation,polysaccharide binding
Npp.06C000780.1	AT4G02360.1					LOC_Os03g27580.1					Sobic.006G006200.1.p					Zm00008a011800_P01
Npp.06C002070.1																Zm00008a039069_P01
Npp.06C002140.1	AT1G65480.1	K16223	FT; protein FLOWERING LOCUS T	GO:0008429,GO:0009909,GO:0048573	phosphatidylethanolamine binding,regulation of flower development,photoperiodism, flowering	LOC_Os06g35940.1					Sobic.010G164200.1.p	K16223	FT; protein FLOWERING LOCUS T			Zm00008a034434_P01	K16223	FT; protein FLOWERING LOCUS T
Npp.06C004560.1	AT2G01150.1	K16282	RHA2; E3 ubiquitin-protein ligase RHA2 [EC:2.3.2.27]	GO:0005515,GO:0008270	protein binding,zinc ion binding	LOC_Os04g16970.1			GO:0005515,GO:0008270,GO:0046872	protein binding,zinc ion binding,metal ion binding	Sobic.006G036400.1.p			GO:0005515,GO:0008270	protein binding,zinc ion binding	Zm00008a007780_P01			GO:0005515,GO:0008270	protein binding,zinc ion binding
Npp.06C004570.1	AT1G40087.1					LOC_Os05g11260.2					Sobic.001G271700.2.p					Zm00008a031650_P01
Npp.06C005040.1	AT2G14120.3	K17065	DNM1L; dynamin 1-like protein [EC:3.6.5.5]	GO:0003924,GO:0005525	GTPase activity,GTP binding	LOC_Os04g31190.1	K01528	DNM1_3; dynamin 1/3 [EC:3.6.5.5]	GO:0003924,GO:0005525	GTPase activity,GTP binding	Sobic.006G047900.1.p	K17065	DNM1L; dynamin 1-like protein [EC:3.6.5.5]	GO:0003924,GO:0005525	GTPase activity,GTP binding	Zm00008a007637_P01			GO:0005525	GTP binding
Npp.06C005110.1	AT4G32850.8	K14376	PAP; poly(A) polymerase [EC:2.7.7.19]	GO:0003723,GO:0004652,GO:0005634,GO:0016779,GO:0043631	RNA binding,polynucleotide adenylyltransferase activity,nucleus,nucleotidyltransferase activity,RNA polyadenylation	LOC_Os06g36360.2	K14376	PAP; poly(A) polymerase [EC:2.7.7.19]	GO:0003723,GO:0004652,GO:0005634,GO:0016779,GO:0043631	RNA binding,polynucleotide adenylyltransferase activity,nucleus,nucleotidyltransferase activity,RNA polyadenylation	Sobic.010G167900.4.p	K14376	PAP; poly(A) polymerase [EC:2.7.7.19]	GO:0003723,GO:0004652,GO:0005634,GO:0016779,GO:0043631	RNA binding,polynucleotide adenylyltransferase activity,nucleus,nucleotidyltransferase activity,RNA polyadenylation	Zm00008a034408_P01	K14376	PAP; poly(A) polymerase [EC:2.7.7.19]	GO:0003723,GO:0004652,GO:0005634,GO:0016779,GO:0043631	RNA binding,polynucleotide adenylyltransferase activity,nucleus,nucleotidyltransferase activity,RNA polyadenylation
Npp.06C005500.1	AT3G59580.1			GO:0005515	protein binding	LOC_Os04g41850.1			GO:0005515	protein binding	Sobic.006G133900.1.p			GO:0005515	protein binding	Zm00008a006984_P01			GO:0005515	protein binding
Npp.06C005670.1	AT4G31920.1	K14491	ARR-B; two-component response regulator ARR-B family	GO:0000160	phosphorelay signal transduction system	LOC_Os04g28130.1			GO:0000156,GO:0000160	phosphorelay response regulator activity,phosphorelay signal transduction system	Sobic.006G035700.1.p			GO:0000160	phosphorelay signal transduction system	Zm00008a007707_P01			GO:0000160	phosphorelay signal transduction system
Npp.06C005740.1																Zm00008a039367_P01			GO:0003676,GO:0008270,GO:0015074	nucleic acid binding,zinc ion binding,DNA integration
Npp.06C005860.1											Sobic.004G138850.1.p			GO:0003676,GO:0008270	nucleic acid binding,zinc ion binding	Zm00008a039215_P01			GO:0003676,GO:0008270,GO:0015074	nucleic acid binding,zinc ion binding,DNA integration
Npp.06C007400.1	AT5G61890.1			GO:0003700,GO:0006355	DNA-binding transcription factor activity,regulation of transcription, DNA-templated	LOC_Os04g32620.1			GO:0003700,GO:0006355	DNA-binding transcription factor activity,regulation of transcription, DNA-templated	Sobic.006G058732.1.p			GO:0003700,GO:0006355	DNA-binding transcription factor activity,regulation of transcription, DNA-templated	Zm00008a007545_P01
Npp.06C007880.1						LOC_Os10g24954.1			GO:0006508,GO:0008234	proteolysis,cysteine-type peptidase activity	Sobic.009G245200.2.p			GO:0006508,GO:0008234	proteolysis,cysteine-type peptidase activity	Zm00008a002393_P01
Npp.06C007920.1						LOC_Os04g32860.1					Sobic.006G060400.1.p					Zm00008a032065_P01
Npp.06C007950.1						LOC_Os04g32860.1					Sobic.006G060900.1.p					Zm00008a007529_P01
Npp.06C016490.1	AT1G21240.1			GO:0004672,GO:0005509,GO:0006468,GO:0030247	protein kinase activity,calcium ion binding,protein phosphorylation,polysaccharide binding	LOC_Os03g62430.1			GO:0004672,GO:0004674,GO:0004713,GO:0005509,GO:0005524,GO:0006468	protein kinase activity,protein serine/threonine kinase activity,protein tyrosine kinase activity,calcium ion binding,ATP binding,protein phosphorylation	Sobic.006G152200.1.p			GO:0004672,GO:0005509,GO:0005524,GO:0006468,GO:0030247	protein kinase activity,calcium ion binding,ATP binding,protein phosphorylation,polysaccharide binding	Zm00008a006833_P01			GO:0004672,GO:0005509,GO:0005524,GO:0006468,GO:0030247	protein kinase activity,calcium ion binding,ATP binding,protein phosphorylation,polysaccharide binding
Npp.06C016500.1	AT4G34860.1			GO:0033926	glycopeptide alpha-N-acetylgalactosaminidase activity	LOC_Os02g34560.1					Sobic.005G124700.1.p			GO:0004672,GO:0005524,GO:0006468,GO:0030247	protein kinase activity,ATP binding,protein phosphorylation,polysaccharide binding	Zm00008a016459_P01			GO:0033926	glycopeptide alpha-N-acetylgalactosaminidase activity
Npp.06C016510.1																Zm00008a016200_P01
Npp.06C016710.1	AT5G08350.1					LOC_Os04g44500.1					Sobic.006G154400.1.p					Zm00008a006810_P01
Npp.06C016720.1	AT5G08350.1					LOC_Os04g44510.1					Sobic.006G154500.1.p					Zm00008a006809_P01
Npp.06C016730.1	AT3G53150.1			GO:0008152,GO:0016758	metabolic process,transferase activity, transferring hexosyl groups	LOC_Os04g44240.1			GO:0008152,GO:0016758	metabolic process,transferase activity, transferring hexosyl groups	Sobic.007G028200.1.p			GO:0008152,GO:0016758	metabolic process,transferase activity, transferring hexosyl groups	Zm00008a038265_P01			GO:0008152,GO:0016758	metabolic process,transferase activity, transferring hexosyl groups
Npp.06C023040.1						LOC_Os11g10670.1					Sobic.010G198400.1.p					Zm00008a040091_P01
Npp.06C028160.1	AT1G74450.1					LOC_Os12g06780.1					Sobic.006G277300.1.p					Zm00008a038910_P01
Npp.06C028170.1	AT1G71695.1	K00430	E1.11.1.7; peroxidase [EC:1.11.1.7]	GO:0004601,GO:0006979,GO:0020037,GO:0055114	peroxidase activity,response to oxidative stress,heme binding,obsolete oxidation-reduction process	LOC_Os04g59150.1	K00430	E1.11.1.7; peroxidase [EC:1.11.1.7]	GO:0004601,GO:0006979,GO:0020037,GO:0055114	peroxidase activity,response to oxidative stress,heme binding,obsolete oxidation-reduction process	Sobic.006G277500.1.p	K00430	E1.11.1.7; peroxidase [EC:1.11.1.7]	GO:0004601,GO:0006979,GO:0020037,GO:0055114	peroxidase activity,response to oxidative stress,heme binding,obsolete oxidation-reduction process	Zm00008a006743_P01	K00430	E1.11.1.7; peroxidase [EC:1.11.1.7]	GO:0004601,GO:0006979,GO:0020037,GO:0055114	peroxidase activity,response to oxidative stress,heme binding,obsolete oxidation-reduction process
Npp.06C028200.1	AT1G52950.1	K07466	RFA1, RPA1, rpa; replication factor A1			LOC_Os03g63870.1					Sobic.009G035400.2.p	K07466	RFA1, RPA1, rpa; replication factor A1			Zm00008a022305_P01	K07466	RFA1, RPA1, rpa; replication factor A1
Npp.06C028210.1	AT4G16270.1	K00430	E1.11.1.7; peroxidase [EC:1.11.1.7]	GO:0004601,GO:0006979,GO:0020037,GO:0055114	peroxidase activity,response to oxidative stress,heme binding,obsolete oxidation-reduction process	LOC_Os04g59200.1	K00430	E1.11.1.7; peroxidase [EC:1.11.1.7]	GO:0004601,GO:0006979,GO:0020037,GO:0055114	peroxidase activity,response to oxidative stress,heme binding,obsolete oxidation-reduction process	Sobic.006G277700.1.p	K00430	E1.11.1.7; peroxidase [EC:1.11.1.7]	GO:0004601,GO:0006979,GO:0020037,GO:0055114	peroxidase activity,response to oxidative stress,heme binding,obsolete oxidation-reduction process	Zm00008a006746_P01	K00430	E1.11.1.7; peroxidase [EC:1.11.1.7]	GO:0004601,GO:0006979,GO:0020037,GO:0055114	peroxidase activity,response to oxidative stress,heme binding,obsolete oxidation-reduction process
Npp.06C028510.1											Sobic.005G095166.1.p					Zm00008a007047_P01	K07466	RFA1, RPA1, rpa; replication factor A1
Npp.06C028520.1	AT2G43060.1					LOC_Os04g56500.1			GO:0046983	protein dimerization activity	Sobic.006G250500.1.p					Zm00008a006055_P01
Npp.06C028530.1	AT4G27650.1	K06965	PELO, DOM34, pelA; protein pelota			LOC_Os04g56480.1	K06965	PELO, DOM34, pelA; protein pelota			Sobic.006G250300.1.p	K06965	PELO, DOM34, pelA; protein pelota	GO:0070481,GO:0070966,GO:0071025	nuclear-transcribed mRNA catabolic process, non-stop decay,nuclear-transcribed mRNA catabolic process, no-go decay,RNA surveillance	Zm00008a006056_P01	K06965	PELO, DOM34, pelA; protein pelota	GO:0070481,GO:0070966,GO:0071025	nuclear-transcribed mRNA catabolic process, non-stop decay,nuclear-transcribed mRNA catabolic process, no-go decay,RNA surveillance
Npp.07B002030.1						LOC_Os04g10890.1			GO:0003676,GO:0008270	nucleic acid binding,zinc ion binding	Sobic.001G028301.1.p					Zm00008a023797_P01
Npp.07B002170.1	AT5G67150.1			GO:0016747	transferase activity, transferring acyl groups other than amino-acyl groups	LOC_Os08g01950.1			GO:0016747	transferase activity, transferring acyl groups other than amino-acyl groups	Sobic.007G012700.1.p			GO:0016747	transferase activity, transferring acyl groups other than amino-acyl groups	Zm00008a015684_P01			GO:0016747	transferase activity, transferring acyl groups other than amino-acyl groups
Npp.07B002180.1																Zm00008a039338_P01
Npp.07B002380.1	AT2G01720.1	K12666	OST1, RPN1; oligosaccharyltransferase complex subunit alpha (ribophorin I)	GO:0004579,GO:0005783,GO:0006486,GO:0016021	dolichyl-diphosphooligosaccharide-protein glycotransferase activity,endoplasmic reticulum,protein glycosylation,integral component of membrane	LOC_Os05g23600.1	K12666	OST1, RPN1; oligosaccharyltransferase complex subunit alpha (ribophorin I)	GO:0004579,GO:0005783,GO:0006486,GO:0016021	dolichyl-diphosphooligosaccharide-protein glycotransferase activity,endoplasmic reticulum,protein glycosylation,integral component of membrane	Sobic.006G282200.1.p	K12666	OST1, RPN1; oligosaccharyltransferase complex subunit alpha (ribophorin I)	GO:0004579,GO:0005783,GO:0006486,GO:0016021	dolichyl-diphosphooligosaccharide-protein glycotransferase activity,endoplasmic reticulum,protein glycosylation,integral component of membrane	Zm00008a006797_P01	K12666	OST1, RPN1; oligosaccharyltransferase complex subunit alpha (ribophorin I)	GO:0004579,GO:0005783,GO:0006486,GO:0016021	dolichyl-diphosphooligosaccharide-protein glycotransferase activity,endoplasmic reticulum,protein glycosylation,integral component of membrane
Npp.07B002390.1	AT2G01720.1	K12666	OST1, RPN1; oligosaccharyltransferase complex subunit alpha (ribophorin I)	GO:0004579,GO:0005783,GO:0006486,GO:0016021	dolichyl-diphosphooligosaccharide-protein glycotransferase activity,endoplasmic reticulum,protein glycosylation,integral component of membrane	LOC_Os05g23600.1	K12666	OST1, RPN1; oligosaccharyltransferase complex subunit alpha (ribophorin I)	GO:0004579,GO:0005783,GO:0006486,GO:0016021	dolichyl-diphosphooligosaccharide-protein glycotransferase activity,endoplasmic reticulum,protein glycosylation,integral component of membrane	Sobic.006G282200.1.p	K12666	OST1, RPN1; oligosaccharyltransferase complex subunit alpha (ribophorin I)	GO:0004579,GO:0005783,GO:0006486,GO:0016021	dolichyl-diphosphooligosaccharide-protein glycotransferase activity,endoplasmic reticulum,protein glycosylation,integral component of membrane	Zm00008a006797_P01	K12666	OST1, RPN1; oligosaccharyltransferase complex subunit alpha (ribophorin I)	GO:0004579,GO:0005783,GO:0006486,GO:0016021	dolichyl-diphosphooligosaccharide-protein glycotransferase activity,endoplasmic reticulum,protein glycosylation,integral component of membrane
Npp.07B013690.1											Sobic.007G123850.1.p			GO:0015074	DNA integration	Zm00008a039112_P01
Npp.07B013750.1	AT2G07599.2
Npp.07B013760.1																Zm00008a039360_P01
Npp.07B013820.1	AT3G09850.1	K17569	GPATCH2; G patch domain-containing protein 2	GO:0003676	nucleic acid binding	LOC_Os08g19170.1			GO:0003676	nucleic acid binding	Sobic.004G327400.1.p			GO:0003676	nucleic acid binding	Zm00008a002592_P01	K17569	GPATCH2; G patch domain-containing protein 2
Npp.07B013830.1	AT3G04740.1	K15156	MED14, RGR1; mediator of RNA polymerase II transcription subunit 14	GO:0001104,GO:0006357,GO:0016592	,regulation of transcription by RNA polymerase II,mediator complex	LOC_Os09g10960.1			GO:0001104,GO:0006357,GO:0016592	,regulation of transcription by RNA polymerase II,mediator complex	Sobic.007G103100.1.p	K15156	MED14, RGR1; mediator of RNA polymerase II transcription subunit 14	GO:0001104,GO:0006357,GO:0016592	,regulation of transcription by RNA polymerase II,mediator complex	Zm00008a008717_P01	K15156	MED14, RGR1; mediator of RNA polymerase II transcription subunit 14	GO:0001104,GO:0006357,GO:0016592	,regulation of transcription by RNA polymerase II,mediator complex
Npp.07B013840.1	AT3G04740.1	K15156	MED14, RGR1; mediator of RNA polymerase II transcription subunit 14	GO:0001104,GO:0006357,GO:0016592	,regulation of transcription by RNA polymerase II,mediator complex	LOC_Os08g24400.1			GO:0001104,GO:0006357,GO:0016592	,regulation of transcription by RNA polymerase II,mediator complex	Sobic.007G103100.1.p	K15156	MED14, RGR1; mediator of RNA polymerase II transcription subunit 14	GO:0001104,GO:0006357,GO:0016592	,regulation of transcription by RNA polymerase II,mediator complex	Zm00008a008717_P01	K15156	MED14, RGR1; mediator of RNA polymerase II transcription subunit 14	GO:0001104,GO:0006357,GO:0016592	,regulation of transcription by RNA polymerase II,mediator complex
Npp.07B013930.1	AT2G05990.1	K00208	fabI; enoyl-[acyl-carrier protein] reductase I [EC:1.3.1.9 1.3.1.10]			LOC_Os08g23810.1	K00208	fabI; enoyl-[acyl-carrier protein] reductase I [EC:1.3.1.9 1.3.1.10]			Sobic.007G112100.1.p	K00208	fabI; enoyl-[acyl-carrier protein] reductase I [EC:1.3.1.9 1.3.1.10]	GO:0008152,GO:0016491	metabolic process,oxidoreductase activity	Zm00008a027608_P01	K00208	fabI; enoyl-[acyl-carrier protein] reductase I [EC:1.3.1.9 1.3.1.10]
Npp.07B014520.1											Sobic.010G026100.1.p					Zm00008a039445_P01
Npp.07B015140.1	AT2G37410.1	K17795	TIM17; mitochondrial import inner membrane translocase subunit TIM17	GO:0005744,GO:0006886,GO:0015450	TIM23 mitochondrial import inner membrane translocase complex,intracellular protein transport,P-P-bond-hydrolysis-driven protein transmembrane transporter activity	LOC_Os07g41330.1					Sobic.009G178700.1.p					Zm00008a009750_P01	K17795	TIM17; mitochondrial import inner membrane translocase subunit TIM17	GO:0005744,GO:0006886,GO:0015450	TIM23 mitochondrial import inner membrane translocase complex,intracellular protein transport,P-P-bond-hydrolysis-driven protein transmembrane transporter activity
Npp.07B015160.1	AT1G06410.1	K16055	TPS; trehalose 6-phosphate synthase/phosphatase [EC:2.4.1.15 3.1.3.12]	GO:0003824,GO:0005992	catalytic activity,trehalose biosynthetic process	LOC_Os08g34580.1			GO:0003824,GO:0005992,GO:0008152	catalytic activity,trehalose biosynthetic process,metabolic process	Sobic.007G144300.1.p	K16055	TPS; trehalose 6-phosphate synthase/phosphatase [EC:2.4.1.15 3.1.3.12]	GO:0003824,GO:0005992	catalytic activity,trehalose biosynthetic process	Zm00008a003710_P01	K16055	TPS; trehalose 6-phosphate synthase/phosphatase [EC:2.4.1.15 3.1.3.12]	GO:0003824,GO:0005992	catalytic activity,trehalose biosynthetic process
Npp.07B021970.1											Sobic.002G120601.1.p					Zm00008a006120_P01
Npp.07B021980.1											Sobic.007G091301.1.p					Zm00008a015901_P01
Npp.07B022170.1	AT3G24550.1			GO:0004672,GO:0006468	protein kinase activity,protein phosphorylation	LOC_Os01g12720.1			GO:0004672,GO:0004674,GO:0004713,GO:0005524,GO:0006468	protein kinase activity,protein serine/threonine kinase activity,protein tyrosine kinase activity,ATP binding,protein phosphorylation	Sobic.003G010500.1.p			GO:0004672,GO:0006468	protein kinase activity,protein phosphorylation	Zm00008a010674_P01			GO:0004672,GO:0006468	protein kinase activity,protein phosphorylation
Npp.07B022180.1	AT1G52280.1	K07897	RAB7A; Ras-related protein Rab-7A	GO:0005525	GTP binding	LOC_Os01g12730.1	K07976	RAB; Rab family, other	GO:0003924,GO:0005525,GO:0005622,GO:0006184,GO:0006886,GO:0006913,GO:0007165,GO:0007264,GO:0015031	GTPase activity,GTP binding,intracellular anatomical structure,obsolete GTP catabolic process,intracellular protein transport,nucleocytoplasmic transport,signal transduction,small GTPase mediated signal transduction,protein transport	Sobic.003G010400.1.p	K07897	RAB7A; Ras-related protein Rab-7A	GO:0005525	GTP binding	Zm00008a030362_P01	K07897	RAB7A; Ras-related protein Rab-7A	GO:0005525	GTP binding
Npp.07B022190.1						LOC_Os01g12750.1			GO:0005506,GO:0016705,GO:0020037,GO:0055114	iron ion binding,oxidoreductase activity, acting on paired donors, with incorporation or reduction of molecular oxygen,heme binding,obsolete oxidation-reduction process	Sobic.003G010300.1.p			GO:0005506,GO:0016705,GO:0020037,GO:0055114	iron ion binding,oxidoreductase activity, acting on paired donors, with incorporation or reduction of molecular oxygen,heme binding,obsolete oxidation-reduction process	Zm00008a030363_P01			GO:0005506,GO:0016705,GO:0020037,GO:0055114	iron ion binding,oxidoreductase activity, acting on paired donors, with incorporation or reduction of molecular oxygen,heme binding,obsolete oxidation-reduction process
Npp.07B024110.1	AT3G11480.1			GO:0008168	methyltransferase activity	LOC_Os02g48770.1			GO:0008168	methyltransferase activity	Sobic.007G220700.1.p			GO:0008168	methyltransferase activity	Zm00008a018012_P01			GO:0008168	methyltransferase activity
Npp.07B024450.1	AT5G15120.1	K10712	ADO; cysteamine dioxygenase [EC:1.13.11.19]	GO:0016702,GO:0055114	oxidoreductase activity, acting on single donors with incorporation of molecular oxygen, incorporation of two atoms of oxygen,obsolete oxidation-reduction process	LOC_Os08g37470.1	K10712	ADO; cysteamine dioxygenase [EC:1.13.11.19]	GO:0047800,GO:0055114	cysteamine dioxygenase activity,obsolete oxidation-reduction process	Sobic.007G226000.2.p	K10712	ADO; cysteamine dioxygenase [EC:1.13.11.19]	GO:0016702,GO:0055114	oxidoreductase activity, acting on single donors with incorporation of molecular oxygen, incorporation of two atoms of oxygen,obsolete oxidation-reduction process	Zm00008a003098_P01	K10712	ADO; cysteamine dioxygenase [EC:1.13.11.19]	GO:0016702,GO:0055114	oxidoreductase activity, acting on single donors with incorporation of molecular oxygen, incorporation of two atoms of oxygen,obsolete oxidation-reduction process
Npp.07B024460.1	AT5G15120.1	K10712	ADO; cysteamine dioxygenase [EC:1.13.11.19]	GO:0016702,GO:0055114	oxidoreductase activity, acting on single donors with incorporation of molecular oxygen, incorporation of two atoms of oxygen,obsolete oxidation-reduction process	LOC_Os08g37470.1	K10712	ADO; cysteamine dioxygenase [EC:1.13.11.19]	GO:0047800,GO:0055114	cysteamine dioxygenase activity,obsolete oxidation-reduction process	Sobic.007G226000.2.p	K10712	ADO; cysteamine dioxygenase [EC:1.13.11.19]	GO:0016702,GO:0055114	oxidoreductase activity, acting on single donors with incorporation of molecular oxygen, incorporation of two atoms of oxygen,obsolete oxidation-reduction process	Zm00008a003098_P01	K10712	ADO; cysteamine dioxygenase [EC:1.13.11.19]	GO:0016702,GO:0055114	oxidoreductase activity, acting on single donors with incorporation of molecular oxygen, incorporation of two atoms of oxygen,obsolete oxidation-reduction process
Npp.08D007850.1						LOC_Os12g36000.1					Sobic.002G304801.1.p
Npp.08D007860.1	AT1G18090.1	K10746	EXO1; exonuclease 1 [EC:3.1.-.-]	GO:0004518,GO:0006281	nuclease activity,DNA repair	LOC_Os01g56940.1			GO:0003677,GO:0003824,GO:0004518,GO:0006281,GO:0016788	DNA binding,catalytic activity,nuclease activity,DNA repair,hydrolase activity, acting on ester bonds	Sobic.003G314900.1.p	K10746	EXO1; exonuclease 1 [EC:3.1.-.-]	GO:0004518,GO:0006281	nuclease activity,DNA repair	Zm00008a013681_P01	K10746	EXO1; exonuclease 1 [EC:3.1.-.-]	GO:0004518,GO:0006281	nuclease activity,DNA repair
Npp.08D008040.1	AT1G13170.2					LOC_Os12g18770.1					Sobic.008G090000.1.p					Zm00008a002603_P01
Npp.08D008310.1	AT3G48440.1			GO:0046872	metal ion binding	LOC_Os12g18120.1			GO:0046872	metal ion binding	Sobic.008G092300.3.p			GO:0046872	metal ion binding	Zm00008a036606_P01			GO:0046872	metal ion binding
Npp.08D008320.1	ATMG00810.1															Zm00008a039051_P01
Npp.08D008330.1	AT4G23160.1			GO:0004672,GO:0005524,GO:0006468	protein kinase activity,ATP binding,protein phosphorylation											Zm00008a039257_P01			GO:0003676,GO:0008270,GO:0015074	nucleic acid binding,zinc ion binding,DNA integration
Npp.08D008340.1	AT2G47850.1			GO:0046872	metal ion binding	LOC_Os12g18120.1			GO:0046872	metal ion binding	Sobic.008G092300.3.p			GO:0046872	metal ion binding	Zm00008a036606_P01			GO:0046872	metal ion binding
Npp.08D008850.1	AT3G27120.1			GO:0005524,GO:0016887	ATP binding,ATPase activity	LOC_Os12g25720.1					Sobic.008G092800.1.p			GO:0005524	ATP binding	Zm00008a012144_P01			GO:0005524	ATP binding
Npp.08D008860.1	AT3G27120.1			GO:0005524,GO:0016887	ATP binding,ATPase activity	LOC_Os06g03940.1			GO:0000166,GO:0005524,GO:0017111	nucleotide binding,ATP binding,nucleoside-triphosphatase activity	Sobic.008G092800.1.p			GO:0005524	ATP binding	Zm00008a012144_P01			GO:0005524	ATP binding
Npp.09C000340.1	AT1G70060.1	K11644	SIN3A; paired amphipathic helix protein Sin3a	GO:0006355	regulation of transcription, DNA-templated	LOC_Os05g01020.2	K11644	SIN3A; paired amphipathic helix protein Sin3a	GO:0005634,GO:0006355	nucleus,regulation of transcription, DNA-templated	Sobic.009G000100.1.p	K11644	SIN3A; paired amphipathic helix protein Sin3a	GO:0006355	regulation of transcription, DNA-templated	Zm00008a024006_P01	K11644	SIN3A; paired amphipathic helix protein Sin3a	GO:0006355	regulation of transcription, DNA-templated
Npp.09C000350.1	AT1G68710.1	K01530	E7.6.2.1; phospholipid-translocating ATPase [EC:7.6.2.1]	GO:0000166,GO:0000287,GO:0004012,GO:0005524,GO:0015914,GO:0016021,GO:0046872	nucleotide binding,magnesium ion binding,,ATP binding,phospholipid transport,integral component of membrane,metal ion binding	LOC_Os05g01030.1	K01530	E7.6.2.1; phospholipid-translocating ATPase [EC:7.6.2.1]	GO:0000166,GO:0000287,GO:0004012,GO:0005524,GO:0006812,GO:0015914,GO:0016021,GO:0019829,GO:0046872	nucleotide binding,magnesium ion binding,,ATP binding,cation transport,phospholipid transport,integral component of membrane,ATPase-coupled cation transmembrane transporter activity,metal ion binding	Sobic.009G000200.1.p	K01530	E7.6.2.1; phospholipid-translocating ATPase [EC:7.6.2.1]	GO:0000166,GO:0000287,GO:0004012,GO:0005524,GO:0015914,GO:0016021,GO:0046872	nucleotide binding,magnesium ion binding,,ATP binding,phospholipid transport,integral component of membrane,metal ion binding	Zm00008a024005_P01	K01530	E7.6.2.1; phospholipid-translocating ATPase [EC:7.6.2.1]	GO:0000166,GO:0000287,GO:0004012,GO:0005524,GO:0015914,GO:0016021,GO:0046872	nucleotide binding,magnesium ion binding,,ATP binding,phospholipid transport,integral component of membrane,metal ion binding
Npp.09C000360.1	AT3G48190.1	K04728	ATM, TEL1; serine-protein kinase ATM [EC:2.7.11.1]	GO:0005515,GO:0016773	protein binding,phosphotransferase activity, alcohol group as acceptor	LOC_Os12g44130.1					Sobic.009G000600.1.p					Zm00008a011342_P01
Npp.09C000380.1	AT1G19630.1			GO:0005506,GO:0016705,GO:0020037,GO:0055114	iron ion binding,oxidoreductase activity, acting on paired donors, with incorporation or reduction of molecular oxygen,heme binding,obsolete oxidation-reduction process	LOC_Os05g01120.1			GO:0005506,GO:0016705,GO:0020037,GO:0055114	iron ion binding,oxidoreductase activity, acting on paired donors, with incorporation or reduction of molecular oxygen,heme binding,obsolete oxidation-reduction process	Sobic.009G000700.1.p			GO:0005506,GO:0016705,GO:0020037,GO:0055114	iron ion binding,oxidoreductase activity, acting on paired donors, with incorporation or reduction of molecular oxygen,heme binding,obsolete oxidation-reduction process	Zm00008a031909_P01			GO:0005506,GO:0016705,GO:0020037,GO:0055114	iron ion binding,oxidoreductase activity, acting on paired donors, with incorporation or reduction of molecular oxygen,heme binding,obsolete oxidation-reduction process
Npp.09C010280.1						LOC_Os05g39490.1					Sobic.008G109100.1.p
Npp.09C010310.1											Sobic.004G127650.1.p			GO:0003676,GO:0008270	nucleic acid binding,zinc ion binding	Zm00008a039215_P01			GO:0003676,GO:0008270,GO:0015074	nucleic acid binding,zinc ion binding,DNA integration
Npp.10B000940.1	AT5G45480.1					LOC_Os07g08290.1					Sobic.007G037700.2.p					Zm00008a033956_P01
Npp.10B000960.1	AT3G47680.1					LOC_Os02g19460.1					Sobic.009G007500.1.p					Zm00008a024612_P01
Npp.10B000970.1	AT2G13770.1			GO:0016788	hydrolase activity, acting on ester bonds
Npp.10B005760.1	AT5G58030.1					LOC_Os01g51220.1					Sobic.003G366500.1.p					Zm00008a024313_P01
Npp.10B005770.1	AT5G10390.1	K11253	H3; histone H3	GO:0000786,GO:0003677	nucleosome,DNA binding	LOC_Os11g05730.1	K11253	H3; histone H3	GO:0000786,GO:0003677,GO:0006334,GO:0046982	nucleosome,DNA binding,nucleosome assembly,protein heterodimerization activity	Sobic.006G076400.1.p	K11253	H3; histone H3	GO:0000786,GO:0003677	nucleosome,DNA binding	Zm00008a021967_P01	K11253	H3; histone H3	GO:0000786,GO:0003677	nucleosome,DNA binding
Npp.10B005780.1											Sobic.001G216001.1.p			GO:0003676,GO:0008270	nucleic acid binding,zinc ion binding	Zm00008a039380_P01
Npp.10B005850.1	AT5G24300.1	K00703	glgA; starch synthase [EC:2.4.1.21]			LOC_Os06g06560.1	K00703	glgA; starch synthase [EC:2.4.1.21]	GO:0009011,GO:0009058,GO:0009250	starch synthase activity,biosynthetic process,glucan biosynthetic process	Sobic.010G047700.1.p	K00703	glgA; starch synthase [EC:2.4.1.21]			Zm00008a039131_P01	K00703	glgA; starch synthase [EC:2.4.1.21]
Npp.10B005860.1	AT1G06800.1			GO:0006629	lipid metabolic process	LOC_Os05g32380.1			GO:0004806,GO:0006629	triglyceride lipase activity,lipid metabolic process	Sobic.010G047800.1.p			GO:0006629	lipid metabolic process	Zm00008a024322_P01			GO:0006629	lipid metabolic process
Npp.10B005870.1	AT4G17565.1			GO:0005515	protein binding	LOC_Os06g05580.1					Sobic.010G047900.2.p					Zm00008a015091_P01			GO:0005515	protein binding
Npp.10B009570.1	AT1G19640.1	K08241	E2.1.1.141; jasmonate O-methyltransferase [EC:2.1.1.141]	GO:0008168	methyltransferase activity	LOC_Os06g13560.1			GO:0008168	methyltransferase activity	Sobic.010G100100.1.p			GO:0008168	methyltransferase activity	Zm00008a033289_P01			GO:0008168	methyltransferase activity
Npp.10B010490.1	AT5G15230.1					LOC_Os06g15620.1					Sobic.010G111200.1.p					Zm00008a034013_P01
Npp.10B011680.1	AT1G05260.1	K00430	E1.11.1.7; peroxidase [EC:1.11.1.7]	GO:0004601,GO:0006979,GO:0020037,GO:0055114	peroxidase activity,response to oxidative stress,heme binding,obsolete oxidation-reduction process	LOC_Os06g20150.1	K00430	E1.11.1.7; peroxidase [EC:1.11.1.7]	GO:0004601,GO:0006979,GO:0020037,GO:0055114	peroxidase activity,response to oxidative stress,heme binding,obsolete oxidation-reduction process	Sobic.010G128300.1.p	K00430	E1.11.1.7; peroxidase [EC:1.11.1.7]	GO:0004601,GO:0006979,GO:0020037,GO:0055114	peroxidase activity,response to oxidative stress,heme binding,obsolete oxidation-reduction process	Zm00008a036247_P01	K00430	E1.11.1.7; peroxidase [EC:1.11.1.7]	GO:0004601,GO:0006979,GO:0020037,GO:0055114	peroxidase activity,response to oxidative stress,heme binding,obsolete oxidation-reduction process
Npp.10B011690.1	AT1G05260.1	K00430	E1.11.1.7; peroxidase [EC:1.11.1.7]	GO:0004601,GO:0006979,GO:0020037,GO:0055114	peroxidase activity,response to oxidative stress,heme binding,obsolete oxidation-reduction process	LOC_Os06g20150.1	K00430	E1.11.1.7; peroxidase [EC:1.11.1.7]	GO:0004601,GO:0006979,GO:0020037,GO:0055114	peroxidase activity,response to oxidative stress,heme binding,obsolete oxidation-reduction process	Sobic.K026900.1.p	K00430	E1.11.1.7; peroxidase [EC:1.11.1.7]	GO:0004601,GO:0006979,GO:0020037,GO:0055114	peroxidase activity,response to oxidative stress,heme binding,obsolete oxidation-reduction process	Zm00008a036247_P01	K00430	E1.11.1.7; peroxidase [EC:1.11.1.7]	GO:0004601,GO:0006979,GO:0020037,GO:0055114	peroxidase activity,response to oxidative stress,heme binding,obsolete oxidation-reduction process
Npp.10B011940.1																Zm00008a016182_P01
Npp.10B012170.1						LOC_Os06g22420.1					Sobic.010G135800.1.p
Npp.10B012320.1	AT5G52290.1					LOC_Os02g42910.1					Sobic.004G303100.1.p					Zm00008a022447_P01
Npp.10B012360.1						LOC_Os11g23050.1					Sobic.002G148350.1.p
Npp.10B012910.1	AT5G26340.1			GO:0016021,GO:0055085	integral component of membrane,transmembrane transport	LOC_Os07g10590.1			GO:0005215,GO:0006810,GO:0016020,GO:0016021,GO:0022857,GO:0022891,GO:0055085	transporter activity,transport,membrane,integral component of membrane,transmembrane transporter activity,,transmembrane transport	Sobic.002G073600.1.p			GO:0016021,GO:0055085	integral component of membrane,transmembrane transport	Zm00008a027066_P01			GO:0016021,GO:0022857,GO:0055085	integral component of membrane,transmembrane transporter activity,transmembrane transport
Npp.10B013080.1	AT5G48930.1	K13065	E2.3.1.133, HCT; shikimate O-hydroxycinnamoyltransferase [EC:2.3.1.133]	GO:0016747	transferase activity, transferring acyl groups other than amino-acyl groups	LOC_Os06g08640.1	K13065	E2.3.1.133, HCT; shikimate O-hydroxycinnamoyltransferase [EC:2.3.1.133]	GO:0016747	transferase activity, transferring acyl groups other than amino-acyl groups	Sobic.010G066800.1.p			GO:0016747	transferase activity, transferring acyl groups other than amino-acyl groups	Zm00008a024892_P01			GO:0016747	transferase activity, transferring acyl groups other than amino-acyl groups
Npp.10B013170.1	AT4G30810.1	K16297	SCPL-II; serine carboxypeptidase-like clade II [EC:3.4.16.-]	GO:0004185,GO:0006508	serine-type carboxypeptidase activity,proteolysis	LOC_Os06g08720.1			GO:0004185,GO:0006508	serine-type carboxypeptidase activity,proteolysis	Sobic.010G067500.1.p	K16297	SCPL-II; serine carboxypeptidase-like clade II [EC:3.4.16.-]	GO:0004185,GO:0006508	serine-type carboxypeptidase activity,proteolysis	Zm00008a033523_P01	K16297	SCPL-II; serine carboxypeptidase-like clade II [EC:3.4.16.-]	GO:0004185,GO:0006508	serine-type carboxypeptidase activity,proteolysis
Npp.10B013180.1	AT1G65770.1					LOC_Os10g37600.1					Sobic.001G192300.1.p					Zm00008a003960_P01
Npp.10B013610.1	AT5G40580.1	K02739	PSMB7; 20S proteasome subunit beta 2 [EC:3.4.25.1]	GO:0004298,GO:0005839,GO:0051603	threonine-type endopeptidase activity,proteasome core complex,proteolysis involved in cellular protein catabolic process	LOC_Os05g09490.1	K02739	PSMB7; 20S proteasome subunit beta 2 [EC:3.4.25.1]	GO:0004175,GO:0004298,GO:0005839,GO:0051603	endopeptidase activity,threonine-type endopeptidase activity,proteasome core complex,proteolysis involved in cellular protein catabolic process	Sobic.010G007400.1.p	K02739	PSMB7; 20S proteasome subunit beta 2 [EC:3.4.25.1]	GO:0004298,GO:0005839,GO:0051603	threonine-type endopeptidase activity,proteasome core complex,proteolysis involved in cellular protein catabolic process	Zm00008a027149_P01	K02739	PSMB7; 20S proteasome subunit beta 2 [EC:3.4.25.1]	GO:0004298,GO:0005839,GO:0051603	threonine-type endopeptidase activity,proteasome core complex,proteolysis involved in cellular protein catabolic process
Npp.10B013620.1	AT5G40580.1	K02739	PSMB7; 20S proteasome subunit beta 2 [EC:3.4.25.1]	GO:0004298,GO:0005839,GO:0051603	threonine-type endopeptidase activity,proteasome core complex,proteolysis involved in cellular protein catabolic process	LOC_Os05g09490.1	K02739	PSMB7; 20S proteasome subunit beta 2 [EC:3.4.25.1]	GO:0004175,GO:0004298,GO:0005839,GO:0051603	endopeptidase activity,threonine-type endopeptidase activity,proteasome core complex,proteolysis involved in cellular protein catabolic process	Sobic.010G007400.1.p	K02739	PSMB7; 20S proteasome subunit beta 2 [EC:3.4.25.1]	GO:0004298,GO:0005839,GO:0051603	threonine-type endopeptidase activity,proteasome core complex,proteolysis involved in cellular protein catabolic process	Zm00008a027149_P01	K02739	PSMB7; 20S proteasome subunit beta 2 [EC:3.4.25.1]	GO:0004298,GO:0005839,GO:0051603	threonine-type endopeptidase activity,proteasome core complex,proteolysis involved in cellular protein catabolic process
Npp.10B016420.1	ATMG00510.1	K03935	NDUFS2; NADH dehydrogenase (ubiquinone) Fe-S protein 2 [EC:7.1.1.2]	GO:0016651,GO:0048038,GO:0051287,GO:0055114	oxidoreductase activity, acting on NAD(P)H,quinone binding,NAD binding,obsolete oxidation-reduction process	LOC_Os12g33958.1	K03935	NDUFS2; NADH dehydrogenase (ubiquinone) Fe-S protein 2 [EC:7.1.1.2]	GO:0016651,GO:0048038,GO:0051287,GO:0055114	oxidoreductase activity, acting on NAD(P)H,quinone binding,NAD binding,obsolete oxidation-reduction process	Sobic.001G251750.1.p	K03935	NDUFS2; NADH dehydrogenase (ubiquinone) Fe-S protein 2 [EC:7.1.1.2]	GO:0016651,GO:0048038,GO:0051287,GO:0055114	oxidoreductase activity, acting on NAD(P)H,quinone binding,NAD binding,obsolete oxidation-reduction process	Zm00008a011848_P01			GO:0016651,GO:0048038,GO:0051287,GO:0055114	oxidoreductase activity, acting on NAD(P)H,quinone binding,NAD binding,obsolete oxidation-reduction process
Npp.10B022680.1	AT5G11720.1	K01187	malZ; alpha-glucosidase [EC:3.2.1.20]	GO:0004553,GO:0005975	hydrolase activity, hydrolyzing O-glycosyl compounds,carbohydrate metabolic process	LOC_Os06g46284.2	K01187	malZ; alpha-glucosidase [EC:3.2.1.20]	GO:0003824,GO:0004553,GO:0005975	catalytic activity,hydrolase activity, hydrolyzing O-glycosyl compounds,carbohydrate metabolic process	Sobic.010G227400.2.p	K01187	malZ; alpha-glucosidase [EC:3.2.1.20]	GO:0004553,GO:0005975	hydrolase activity, hydrolyzing O-glycosyl compounds,carbohydrate metabolic process	Zm00008a024568_P01	K01187	malZ; alpha-glucosidase [EC:3.2.1.20]	GO:0004553,GO:0005975	hydrolase activity, hydrolyzing O-glycosyl compounds,carbohydrate metabolic process
Npp.10B026810.1	AT1G09010.1	K18577	EBM; mannosylglycoprotein endo-beta-mannosidase [EC:3.2.1.152]	GO:0004553,GO:0005975,GO:0033947	hydrolase activity, hydrolyzing O-glycosyl compounds,carbohydrate metabolic process,mannosylglycoprotein endo-beta-mannosidase activity	LOC_Os05g32530.1			GO:0004553,GO:0005975	hydrolase activity, hydrolyzing O-glycosyl compounds,carbohydrate metabolic process	Sobic.009G126000.1.p	K18577	EBM; mannosylglycoprotein endo-beta-mannosidase [EC:3.2.1.152]	GO:0004553,GO:0005975,GO:0033947	hydrolase activity, hydrolyzing O-glycosyl compounds,carbohydrate metabolic process,mannosylglycoprotein endo-beta-mannosidase activity	Zm00008a025728_P01	K18577	EBM; mannosylglycoprotein endo-beta-mannosidase [EC:3.2.1.152]	GO:0004553,GO:0005975,GO:0033947	hydrolase activity, hydrolyzing O-glycosyl compounds,carbohydrate metabolic process,mannosylglycoprotein endo-beta-mannosidase activity
Npp.10B026820.1	AT5G26330.1			GO:0009055	electron transfer activity	LOC_Os06g50650.1			GO:0005507,GO:0009055	copper ion binding,electron transfer activity	Sobic.010G268900.1.p			GO:0009055	electron transfer activity	Zm00008a020609_P01			GO:0009055	electron transfer activity
Npp.10B026830.1	AT4G35900.1			GO:0003700,GO:0006355,GO:0043565	DNA-binding transcription factor activity,regulation of transcription, DNA-templated,sequence-specific DNA binding	LOC_Os06g50830.1			GO:0003700,GO:0006355,GO:0043565	DNA-binding transcription factor activity,regulation of transcription, DNA-templated,sequence-specific DNA binding	Sobic.010G269000.1.p			GO:0003700,GO:0006355,GO:0043565	DNA-binding transcription factor activity,regulation of transcription, DNA-templated,sequence-specific DNA binding	Zm00008a024414_P01
