# Supplementary material for: Genomic insights into the recent chromosome reduction and polyploidization of complex autopolyploid sugarcane S. spontaneum
Source: Research Square preprint supplement (doi:10.21203/rs.3.rs-494691/v1), 2021-05-14
Supplement: Supplementary file 7 [file 60f1265143a59fade4ac51f2.xlsx]

## Sheet: Allele_table_v20200312
Table S1. The Allele table for S. spontaneum Np-x genome
Representative allele	Allele A	Allele B	Allele C	Allele D
Npp.01A000020.1	Npp.01A000020.1	Npp.09B020500.1	-	-
Npp.01A000030.1	Npp.01A000030.1	Npp.01B025390.1|Npp.01B027550.1|Npp.01B028590.1	Npp.01C019520.1|Npp.01C020200.1|Npp.01C039170.1	-
Npp.01A000060.1	Npp.01A000060.1	Npp.01B025400.1	-	Npp.01D012560.1|Npp.01D012440.1|Npp.01D012460.1
Npp.01A000070.1	Npp.01A000070.1	Npp.01B025430.1	-	Npp.01D012490.1|Npp.01D012580.1|Npp.01D012570.1
Npp.01A000080.1	Npp.01A000080.1	-	-	Npp.01D022690.1
Npp.01A000090.1	Npp.01A000090.1|Npp.01A025260.1	Npp.01B025530.1	Npp.06C004720.1	Npp.01D012500.1
Npp.01A000100.1	Npp.01A000100.1	Npp.01B012040.1	-	Npp.01D010660.1
Npp.01A000110.1	Npp.01A000110.1	Npp.01B051760.1|Npp.01B018310.1	Npp.01C021100.1|Npp.01C032540.1	-
Npp.01A000120.1	Npp.01A000120.1|Npp.01A032150.1|Npp.01A032180.1	Npp.01B050400.1	Npp.01C010940.1|Npp.01C011190.1	Npp.01D014440.1
Npp.01A000130.1	Npp.01A000130.1	-	-	Npp.01D012590.1
Npp.01A000140.1	Npp.01A000140.1|Npp.01A025210.1	Npp.01B025520.1	-	Npp.01D012600.1
Npp.01A000160.1	Npp.01A000160.1|Npp.01A025200.1|Npp.01A025240.1	Npp.01B025510.1	-	Npp.01D012610.1
Npp.01A000170.1	Npp.01A000170.1	Npp.01B017260.1	-	-
Npp.01A000180.1	Npp.01A000180.1	Npp.01B020130.1	-	-
Npp.01A000190.1	Npp.01A000190.1	Npp.01B046680.1|Npp.03B011320.1	Npp.01C040460.1|Npp.01C040650.1	Npp.01D034780.1
Npp.01A000200.1	Npp.01A000200.1	Npp.01B046700.1|Npp.01B046670.1	Npp.01C040630.1|Npp.01C040680.1|Npp.09C008810.1	Npp.01D035040.1|Npp.01D034760.1
Npp.01A000210.1	Npp.01A000210.1	Npp.01B046710.1	Npp.01C040620.1	Npp.01D035080.1
Npp.01A000220.1	Npp.01A000220.1	Npp.01B046720.1	Npp.01C040610.1	Npp.01D035070.1
Npp.01A000240.1	Npp.01A000240.1	Npp.07B005500.1	-	-
Npp.01A000250.1	Npp.01A000250.1|Npp.01A000690.1|Npp.01A010730.1|Npp.01A010740.1|Npp.01A013150.1	-	-	Npp.01D005120.1
Npp.01A000260.1	Npp.01A000260.1	Npp.01B049110.1	-	-
Npp.01A000280.1	Npp.01A000280.1	-	Npp.01C013110.1	-
Npp.01A000300.1	Npp.01A000300.1	-	-	Npp.01D009450.1
Npp.01A000310.1	Npp.01A000310.1	Npp.01B044590.1	Npp.01C037950.1	Npp.01D030510.1
Npp.01A000320.1	Npp.01A000320.1	Npp.01B044580.1	Npp.01C037940.1	Npp.01D030500.1
Npp.01A000330.1	Npp.01A000330.1	-	-	-
Npp.01A000340.1	Npp.01A000340.1	Npp.01B044570.1	Npp.01C037930.1	Npp.01D030490.1
Npp.01A000350.1	Npp.01A000350.1	Npp.01B044560.1	Npp.01C037920.1	Npp.01D030480.1
Npp.01A000360.1	Npp.01A000360.1	Npp.01B044550.1	Npp.01C037910.1	Npp.01D030470.1
Npp.01A000370.1	Npp.01A000370.1	-	-	-
Npp.01A000390.1	Npp.01A000390.1	-	-	Npp.01D035100.1
Npp.01A000410.1	Npp.01A000410.1|Npp.01A000400.1	-	-	-
Npp.01A000430.1	Npp.01A000430.1|Npp.01A000440.1	-	-	Npp.01D010810.1
Npp.01A000460.1	Npp.01A000460.1	Npp.01B025500.1	-	-
Npp.01A000470.1	Npp.01A000470.1|Npp.01A015650.1	-	-	Npp.01D034120.1|Npp.01D034130.1
Npp.01A000490.1	Npp.01A000490.1	Npp.01B000360.1|Npp.04B028810.1	Npp.01C000780.1	-
Npp.01A000500.1	Npp.01A000500.1	Npp.01B002570.1	-	Npp.01D012270.1
Npp.01A000510.1	Npp.01A000510.1	Npp.01B000370.1|Npp.10B013450.1	Npp.01C000790.1	-
Npp.01A000520.1	Npp.01A000520.1	-	-	-
Npp.01A000530.1	Npp.01A000530.1|Npp.08A014120.1|Npp.ctg086841	Npp.01B000380.1	Npp.01C000820.1|Npp.01C000030.1|Npp.01C000830.1	Npp.ctg056201
Npp.01A000540.1	Npp.01A000540.1|Npp.01A000560.1	Npp.01B000390.1	-	-
Npp.01A000550.1	Npp.01A000550.1	Npp.01B000400.1	Npp.01C000840.1	-
Npp.01A000570.1	Npp.01A000570.1	Npp.01B000690.1	Npp.01C001090.1	-
Npp.01A000580.1	Npp.01A000580.1	Npp.01B000700.1|Npp.04B020650.1	Npp.01C001080.1	Npp.01D030870.1
Npp.01A000590.1	Npp.01A000590.1	Npp.01B000710.1	Npp.01C001060.1|Npp.02C041800.1	-
Npp.01A000600.1	Npp.01A000600.1|Npp.01A000700.1	Npp.01B000720.1	Npp.01C001040.1	-
Npp.01A000610.1	Npp.01A000610.1	Npp.01B000730.1	Npp.01C001030.1	-
Npp.01A000620.1	Npp.01A000620.1	Npp.01B000740.1	Npp.01C001020.1|Npp.06C012280.1	-
Npp.01A000630.1	Npp.01A000630.1|Npp.01A000730.1	Npp.01B000750.1	Npp.01C001000.1	-
Npp.01A000640.1	Npp.01A000640.1|Npp.01A000740.1	Npp.01B000770.1|Npp.01B003400.1	Npp.01C000990.1|Npp.01C000970.1|Npp.01C000980.1	-
Npp.01A000650.1	Npp.01A000650.1	Npp.01B003390.1	Npp.01C000960.1	-
Npp.01A000660.1	Npp.01A000660.1	Npp.01B003380.1	Npp.01C000950.1	-
Npp.01A000670.1	Npp.01A000670.1	Npp.01B003370.1	Npp.01C000940.1|Npp.02C000070.1	-
Npp.01A000680.1	Npp.01A000680.1	Npp.01B003420.1	Npp.01C000900.1	-
Npp.01A000710.1	Npp.01A000710.1|Npp.01A044630.1	-	-	-
Npp.01A000720.1	Npp.01A000720.1|Npp.01A008060.1	-	-	Npp.01D013590.1
Npp.01A000750.1	Npp.01A000750.1	Npp.01B000670.1	Npp.01C001120.1|Npp.01C001130.1	-
Npp.01A000760.1	Npp.01A000760.1|Npp.02A011750.1	Npp.01B000650.1	Npp.01C001140.1	-
Npp.01A000770.1	Npp.01A000770.1|Npp.03A004590.1	Npp.01B000640.1|Npp.04B020570.1	Npp.01C001150.1	-
Npp.01A000780.1	Npp.01A000780.1	Npp.01B000590.1	-	Npp.01D000590.1
Npp.01A000790.1	Npp.01A000790.1	Npp.01B000580.1	-	Npp.01D000580.1
Npp.01A000800.1	Npp.01A000800.1|Npp.01A000840.1|Npp.01A019900.1	-	-	Npp.01D038500.1
Npp.01A000810.1	Npp.01A000810.1|Npp.01A000830.1	Npp.01B001060.1	-	-
Npp.01A000820.1	Npp.01A000820.1|Npp.07A015020.1	Npp.01B001090.1|Npp.01B001080.1|Npp.01B001070.1	Npp.01C001380.1	-
Npp.01A000850.1	Npp.01A000850.1|Npp.03A012180.1	Npp.01B001050.1	Npp.01C001320.1	-
Npp.01A000860.1	Npp.01A000860.1	Npp.01B001040.1|Npp.09B012980.1	-	-
Npp.01A000870.1	Npp.01A000870.1	Npp.01B001030.1	Npp.01C001310.1	-
Npp.01A000880.1	Npp.01A000880.1	-	-	-
Npp.01A000890.1	Npp.01A000890.1|Npp.08A005730.1	Npp.01B001010.1	Npp.01C001290.1	-
Npp.01A000900.1	Npp.01A000900.1	Npp.01B001000.1	Npp.01C001280.1	-
Npp.01A000910.1	Npp.01A000910.1	Npp.01B000990.1	Npp.01C001270.1	-
Npp.01A000920.1	Npp.01A000920.1	Npp.01B000960.1	-	Npp.01D000370.1
Npp.01A000930.1	Npp.01A000930.1	Npp.01B000970.1|Npp.07B022290.1	Npp.01C001260.1|Npp.01C022130.1	Npp.01D000360.1
Npp.01A000940.1	Npp.01A000940.1	Npp.01B000950.1	Npp.01C001250.1	Npp.01D000380.1
Npp.01A000950.1	Npp.01A000950.1	Npp.01B000940.1	Npp.01C001240.1	Npp.01D000390.1
Npp.01A000960.1	Npp.01A000960.1	Npp.01B042400.1	-	-
Npp.01A000970.1	Npp.01A000970.1	Npp.01B001110.1	Npp.01C001370.1	-
Npp.01A000980.1	Npp.01A000980.1	Npp.01B001120.1	Npp.01C001400.1	Npp.01D021480.1|Npp.02D027190.1
Npp.01A000990.1	Npp.01A000990.1	Npp.01B001130.1	Npp.01C001410.1	-
Npp.01A001000.1	Npp.01A001000.1	Npp.01B001140.1	Npp.01C001420.1	-
Npp.01A001010.1	Npp.01A001010.1	Npp.01B001150.1	Npp.01C001430.1	-
Npp.01A001020.1	Npp.01A001020.1	Npp.01B001160.1|Npp.03B015210.1	Npp.01C001440.1	-
Npp.01A001030.1	Npp.01A001030.1	Npp.01B001170.1	Npp.01C001450.1	Npp.04D014510.1
Npp.01A001040.1	Npp.01A001040.1	Npp.01B001190.1	Npp.01C001460.1	-
Npp.01A001050.1	Npp.01A001050.1	Npp.01B001210.1|Npp.01B001200.1	Npp.01C001470.1|Npp.01C001480.1	-
Npp.01A001060.1	Npp.01A001060.1	Npp.01B001220.1	Npp.01C001490.1	-
Npp.01A001070.1	Npp.01A001070.1	Npp.01B001230.1	Npp.01C001500.1	-
Npp.01A001080.1	Npp.01A001080.1	Npp.01B001250.1	Npp.01C001520.1	-
Npp.01A001090.1	Npp.01A001090.1	Npp.01B001260.1	Npp.01C001530.1	-
Npp.01A001100.1	Npp.01A001100.1	Npp.01B001270.1	Npp.01C001540.1|Npp.01C001550.1	-
Npp.01A001110.1	Npp.01A001110.1	Npp.01B001280.1	-	-
Npp.01A001120.1	Npp.01A001120.1	Npp.01B001290.1	Npp.01C001560.1	-
Npp.01A001130.1	Npp.01A001130.1	Npp.01B001300.1	-	-
Npp.01A001140.1	Npp.01A001140.1	Npp.01B001310.1|Npp.07B014470.1	Npp.01C001570.1	-
Npp.01A001150.1	Npp.01A001150.1	Npp.01B001320.1	Npp.01C001580.1	-
Npp.01A001160.1	Npp.01A001160.1	Npp.01B001330.1	Npp.01C001590.1	-
Npp.01A001170.1	Npp.01A001170.1	-	Npp.01C001600.1	-
Npp.01A001180.1	Npp.01A001180.1	Npp.01B001340.1	-	-
Npp.01A001190.1	Npp.01A001190.1|Npp.01A001200.1	Npp.01B001390.1	Npp.01C001650.1	-
Npp.01A001210.1	Npp.01A001210.1	Npp.01B001400.1|Npp.01B001620.1|Npp.01B001410.1	Npp.01C001640.1|Npp.01C001700.1	-
Npp.01A001220.1	Npp.01A001220.1	Npp.01B050220.1	Npp.01C044390.1	Npp.01D037920.1
Npp.01A001230.1	Npp.01A001230.1	Npp.01B050200.1	Npp.01C044400.1	Npp.01D037930.1
Npp.01A001240.1	Npp.01A001240.1|Npp.01A050210.1	-	Npp.01C044410.1|Npp.01C044430.1|Npp.01C022970.1|Npp.05C007850.1	Npp.01D037950.1
Npp.01A001250.1	Npp.01A001250.1	Npp.01B050480.1	Npp.01C044450.1|Npp.01C044440.1	Npp.01D037960.1|Npp.03D037710.1
Npp.01A001260.1	Npp.01A001260.1	-	Npp.01C044480.1	Npp.01D037990.1
Npp.01A001270.1	Npp.01A001270.1	Npp.01B050490.1	Npp.01C044520.1	Npp.01D038010.1
Npp.01A001280.1	Npp.01A001280.1	Npp.01B050180.1|Npp.01B050410.1	-	Npp.01D037880.1
Npp.01A001290.1	Npp.01A001290.1	Npp.01B050170.1|Npp.01B050240.1|Npp.01B050390.1|Npp.01B050420.1	-	Npp.01D037860.1
Npp.01A001300.1	Npp.01A001300.1	Npp.01B050440.1	Npp.01C044360.1|Npp.10C007660.1|Npp.04C009560.1	Npp.01D037890.1
Npp.01A001310.1	Npp.01A001310.1	Npp.01B050230.1|Npp.01B050430.1	Npp.01C044370.1	Npp.01D037900.1
Npp.01A001320.1	Npp.01A001320.1	Npp.01B001540.1|Npp.01B001610.1	Npp.01C001800.1	-
Npp.01A001330.1	Npp.01A001330.1|Npp.01A001540.1	Npp.01B001680.1	Npp.01C002160.1	-
Npp.01A001350.1	Npp.01A001350.1|Npp.01A001490.1	-	Npp.01C002110.1	-
Npp.01A001360.1	Npp.01A001360.1|Npp.01A014770.1	Npp.01B006550.1	Npp.01C001970.1	-
Npp.01A001370.1	Npp.01A001370.1	Npp.01B006540.1	Npp.01C001980.1	-
Npp.01A001380.1	Npp.01A001380.1	Npp.01B006530.1	Npp.01C002000.1	-
Npp.01A001390.1	Npp.01A001390.1|Npp.05A005180.1	Npp.01B006520.1	Npp.01C002010.1|Npp.03C002660.1	-
Npp.01A001400.1	Npp.01A001400.1	Npp.01B006510.1	Npp.01C002020.1	-
Npp.01A001410.1	Npp.01A001410.1	Npp.01B006500.1	-	-
Npp.01A001420.1	Npp.01A001420.1	Npp.01B006490.1	Npp.01C002030.1	-
Npp.01A001430.1	Npp.01A001430.1|Npp.01A001720.1	Npp.01B001870.1|Npp.01B006480.1	Npp.01C002040.1|Npp.01C002200.1	-
Npp.01A001440.1	Npp.01A001440.1	Npp.01B006460.1	Npp.01C002060.1	-
Npp.01A001450.1	Npp.01A001450.1	Npp.01B006440.1	-	-
Npp.01A001460.1	Npp.01A001460.1	Npp.01B006430.1	Npp.01C002080.1	-
Npp.01A001470.1	Npp.01A001470.1	Npp.01B006420.1	Npp.01C002090.1	-
Npp.01A001480.1	Npp.01A001480.1	-	Npp.01C002100.1	-
Npp.01A001500.1	Npp.01A001500.1|Npp.01A001340.1	-	Npp.01C002120.1|Npp.06C019780.1	-
Npp.01A001510.1	Npp.01A001510.1	Npp.01B006470.1	Npp.01C002130.1|Npp.01C002050.1	-
Npp.01A001520.1	Npp.01A001520.1	-	Npp.01C002140.1	-
Npp.01A001530.1	Npp.01A001530.1	-	Npp.01C002150.1|Npp.02C002580.1	-
Npp.01A001550.1	Npp.01A001550.1	Npp.01B001740.1|Npp.01B001660.1	-	-
Npp.01A001560.1	Npp.01A001560.1	Npp.01B001650.1|Npp.01B001750.1	-	-
Npp.01A001570.1	Npp.01A001570.1|Npp.01A026920.1	-	-	-
Npp.01A001580.1	Npp.01A001580.1	Npp.01B001640.1|Npp.01B001760.1	-	-
Npp.01A001590.1	Npp.01A001590.1	Npp.01B001630.1|Npp.01B001770.1	-	-
Npp.01A001600.1	Npp.01A001600.1	Npp.01B001700.1|Npp.09B008090.1	-	-
Npp.01A001620.1	Npp.01A001620.1	Npp.01B001720.1|Npp.01B001790.1	-	Npp.07D012360.1
Npp.01A001630.1	Npp.01A001630.1	-	-	-
Npp.01A001640.1	Npp.01A001640.1	-	Npp.01C040700.1	-
Npp.01A001650.1	Npp.01A001650.1	Npp.01B001730.1|Npp.01B001800.1	-	-
Npp.01A001660.1	Npp.01A001660.1	Npp.01B001810.1	-	-
Npp.01A001670.1	Npp.01A001670.1	Npp.01B001820.1	-	-
Npp.01A001680.1	Npp.01A001680.1|Npp.10A000040.1	Npp.01B001830.1	-	-
Npp.01A001690.1	Npp.01A001690.1	Npp.01B001840.1	Npp.01C002170.1	-
Npp.01A001700.1	Npp.01A001700.1	Npp.01B001850.1	Npp.01C002180.1	-
Npp.01A001710.1	Npp.01A001710.1	Npp.01B001860.1	Npp.01C002190.1	-
Npp.01A001730.1	Npp.01A001730.1|Npp.02A001560.1	Npp.01B001880.1	Npp.01C002210.1	-
Npp.01A001740.1	Npp.01A001740.1	Npp.01B001890.1	Npp.01C002220.1	-
Npp.01A001750.1	Npp.01A001750.1	Npp.01B001900.1	-	-
Npp.01A001760.1	Npp.01A001760.1|Npp.01A001820.1	Npp.01B001910.1	-	-
Npp.01A001770.1	Npp.01A001770.1|Npp.01A001840.1|Npp.01A001810.1|Npp.01A001850.1	Npp.01B001920.1	-	Npp.06D022380.1
Npp.01A001780.1	Npp.01A001780.1|Npp.01A001860.1	Npp.01B001930.1	-	-
Npp.01A001790.1	Npp.01A001790.1|Npp.01A001930.1	Npp.01B002000.1	-	-
Npp.01A001800.1	Npp.01A001800.1|Npp.01A001920.1	Npp.01B001980.1	-	Npp.07D001950.1
Npp.01A001830.1	Npp.01A001830.1	-	Npp.01C042800.1	-
Npp.01A001870.1	Npp.01A001870.1|Npp.07A020570.1	Npp.01B001940.1	Npp.01C002230.1	-
Npp.01A001880.1	Npp.01A001880.1	-	-	Npp.01D008210.1
Npp.01A001890.1	Npp.01A001890.1	Npp.01B001950.1	Npp.01C002240.1	-
Npp.01A001900.1	Npp.01A001900.1	Npp.01B001960.1	Npp.01C002250.1	-
Npp.01A001910.1	Npp.01A001910.1	Npp.01B001970.1	Npp.01C002260.1	-
Npp.01A001940.1	Npp.01A001940.1|Npp.03A034990.1	Npp.01B002010.1	-	-
Npp.01A001950.1	Npp.01A001950.1	Npp.01B002020.1	-	Npp.05D011680.1
Npp.01A001960.1	Npp.01A001960.1|Npp.01A002030.1	Npp.01B002030.1|Npp.07B001990.1	-	-
Npp.01A001980.1	Npp.01A001980.1|Npp.01A002050.1	Npp.01B002050.1	Npp.05C005820.1	-
Npp.01A001990.1	Npp.01A001990.1|Npp.01A002060.1	Npp.01B002060.1	-	-
Npp.01A002010.1	Npp.01A002010.1|Npp.01A002080.1	Npp.01B002080.1	-	-
Npp.01A002020.1	Npp.01A002020.1	-	Npp.01C036840.1	-
Npp.01A002040.1	Npp.01A002040.1|Npp.01A001970.1	Npp.01B002040.1	-	-
Npp.01A002070.1	Npp.01A002070.1|Npp.01A002000.1	Npp.01B002100.1|Npp.01B004650.1	-	-
Npp.01A002090.1	Npp.01A002090.1	Npp.01B002090.1	-	-
Npp.01A002100.1	Npp.01A002100.1	Npp.01B002120.1	-	-
Npp.01A002110.1	Npp.01A002110.1	Npp.01B002140.1	Npp.01C003270.1	Npp.05D024440.1
Npp.01A002120.1	Npp.01A002120.1	Npp.01B002150.1|Npp.01B002130.1	Npp.01C003260.1	Npp.02D039860.1
Npp.01A002130.1	Npp.01A002130.1	Npp.01B002160.1	Npp.01C003240.1|Npp.03C000520.1	-
Npp.01A002150.1	Npp.01A002150.1	Npp.01B002200.1	Npp.01C003130.1	-
Npp.01A002160.1	Npp.01A002160.1	Npp.01B002220.1|Npp.09B006720.1	Npp.01C003290.1|Npp.01C003230.1|Npp.09C023740.1	-
Npp.01A002170.1	Npp.01A002170.1	Npp.01B002230.1	Npp.01C003220.1|Npp.01C003280.1	-
Npp.01A002180.1	Npp.01A002180.1	Npp.01B002240.1	Npp.01C003210.1	-
Npp.01A002190.1	Npp.01A002190.1	Npp.01B002250.1	Npp.01C003200.1	-
Npp.01A002210.1	Npp.01A002210.1	-	-	-
Npp.01A002220.1	Npp.01A002220.1	Npp.01B002270.1	Npp.01C003180.1	-
Npp.01A002230.1	Npp.01A002230.1	Npp.01B002260.1	Npp.01C003170.1|Npp.01C003190.1	-
Npp.01A002240.1	Npp.01A002240.1	-	Npp.01C003160.1	-
Npp.01A002250.1	Npp.01A002250.1	Npp.01B002280.1	Npp.01C003140.1	-
Npp.01A002260.1	Npp.01A002260.1|Npp.10A001420.1	Npp.01B002290.1|Npp.06B009120.1	Npp.01C002270.1	-
Npp.01A002270.1	Npp.01A002270.1	Npp.01B002300.1	Npp.01C002280.1	-
Npp.01A002280.1	Npp.01A002280.1|Npp.01A018200.1	Npp.01B002310.1	Npp.01C002290.1	-
Npp.01A002290.1	Npp.01A002290.1	-	-	-
Npp.01A002310.1	Npp.01A002310.1	Npp.01B002330.1	-	-
Npp.01A002320.1	Npp.01A002320.1	Npp.01B002340.1	Npp.01C002300.1	-
Npp.01A002330.1	Npp.01A002330.1	Npp.01B002350.1|Npp.01B027930.1	Npp.01C002320.1	-
Npp.01A002340.1	Npp.01A002340.1	Npp.01B002370.1	Npp.01C002340.1	Npp.01D033900.1
Npp.01A002350.1	Npp.01A002350.1	Npp.01B002380.1	Npp.01C002350.1	-
Npp.01A002360.1	Npp.01A002360.1	Npp.01B002390.1|Npp.01B002400.1|Npp.07B003790.1|Npp.07B003800.1	Npp.01C002360.1	Npp.05D010050.1
Npp.01A002370.1	Npp.01A002370.1	Npp.07B011310.1	Npp.01C002370.1	-
Npp.01A002380.1	Npp.01A002380.1|Npp.01A049340.1	-	Npp.01C021270.1	-
Npp.01A002390.1	Npp.01A002390.1	-	Npp.01C002390.1	-
Npp.01A002400.1	Npp.01A002400.1	Npp.08B013970.1	Npp.01C002420.1	-
Npp.01A002420.1	Npp.01A002420.1|Npp.01A003280.1|Npp.01A002410.1	Npp.01B002430.1	Npp.01C002430.1	-
Npp.01A002430.1	Npp.01A002430.1|Npp.01A002520.1	Npp.01B002870.1	Npp.01C002740.1	-
Npp.01A002440.1	Npp.01A002440.1|Npp.01A002490.1	Npp.01B002840.1	Npp.01C002730.1|Npp.01C011940.1	-
Npp.01A002450.1	Npp.01A002450.1	Npp.01B002790.1	-	-
Npp.01A002460.1	Npp.01A002460.1	Npp.01B002800.1|Npp.05B011320.1	Npp.01C002670.1	-
Npp.01A002470.1	Npp.01A002470.1	Npp.01B002810.1	Npp.01C002680.1	-
Npp.01A002480.1	Npp.01A002480.1|Npp.08A015780.1	Npp.01B002830.1	Npp.01C002700.1|Npp.01C029020.1	Npp.06D013490.1
Npp.01A002500.1	Npp.01A002500.1|Npp.08A015760.1	Npp.01B002850.1	Npp.01C002720.1	-
Npp.01A002510.1	Npp.01A002510.1|Npp.02A014340.1	Npp.01B002860.1	Npp.01C002710.1	-
Npp.01A002530.1	Npp.01A002530.1	Npp.01B002880.1	Npp.01C002750.1	-
Npp.01A002540.1	Npp.01A002540.1	Npp.01B002890.1	Npp.01C002760.1	Npp.05D001190.1
Npp.01A002550.1	Npp.01A002550.1	Npp.01B002900.1	Npp.01C002770.1	-
Npp.01A002560.1	Npp.01A002560.1	Npp.01B002910.1	Npp.01C002780.1	-
Npp.01A002570.1	Npp.01A002570.1	Npp.01B002920.1	Npp.01C002790.1	-
Npp.01A002580.1	Npp.01A002580.1	Npp.01B002930.1	Npp.01C002810.1	-
Npp.01A002590.1	Npp.01A002590.1	Npp.01B002940.1	Npp.01C002820.1|Npp.01C002800.1	-
Npp.01A002600.1	Npp.01A002600.1	Npp.01B002960.1	Npp.01C002830.1	Npp.04D011950.1
Npp.01A002610.1	Npp.01A002610.1	Npp.01B002970.1	Npp.01C002840.1	-
Npp.01A002620.1	Npp.01A002620.1	-	Npp.01C002850.1	-
Npp.01A002630.1	Npp.01A002630.1	Npp.01B002980.1	Npp.01C002860.1	-
Npp.01A002640.1	Npp.01A002640.1	Npp.01B002990.1	Npp.01C002870.1	-
Npp.01A002650.1	Npp.01A002650.1	Npp.01B003000.1|Npp.03B011560.1	Npp.01C002880.1	-
Npp.01A002660.1	Npp.01A002660.1	-	Npp.01C002900.1	-
Npp.01A002670.1	Npp.01A002670.1	Npp.01B003010.1	Npp.01C002910.1	-
Npp.01A002680.1	Npp.01A002680.1	Npp.01B003030.1	Npp.01C002920.1	-
Npp.01A002690.1	Npp.01A002690.1|Npp.09A014650.1	Npp.01B003040.1	Npp.01C002930.1|Npp.08C016760.1	-
Npp.01A002700.1	Npp.01A002700.1	Npp.01B003050.1|Npp.02B004360.1	Npp.01C002950.1	-
Npp.01A002710.1	Npp.01A002710.1|Npp.01A002720.1	Npp.01B003060.1	Npp.01C002960.1	Npp.01D040910.1
Npp.01A002730.1	Npp.01A002730.1	Npp.01B003140.1|Npp.01B003070.1	Npp.01C002970.1|Npp.09C016830.1	-
Npp.01A002750.1	Npp.01A002750.1|Npp.01A002740.1	Npp.01B003150.1	Npp.01C002980.1	-
Npp.01A002760.1	Npp.01A002760.1	Npp.01B046230.1|Npp.07B024890.1	Npp.01C039840.1	Npp.01D033180.1|Npp.01D033330.1
Npp.01A002770.1	Npp.01A002770.1	Npp.01B045940.1	Npp.01C003000.1	-
Npp.01A002780.1	Npp.01A002780.1	-	Npp.01C003010.1	-
Npp.01A002790.1	Npp.01A002790.1	Npp.01B003160.1	Npp.01C003020.1|Npp.04C022290.1|Npp.07C018430.1	-
Npp.01A002800.1	Npp.01A002800.1	Npp.01B003170.1	Npp.01C003030.1	-
Npp.01A002810.1	Npp.01A002810.1	Npp.01B003080.1	Npp.01C003040.1	-
Npp.01A002820.1	Npp.01A002820.1	Npp.01B003180.1	Npp.01C003050.1	-
Npp.01A002830.1	Npp.01A002830.1	Npp.01B003190.1	-	-
Npp.01A002840.1	Npp.01A002840.1	Npp.01B003100.1|Npp.01B003210.1	-	-
Npp.01A002850.1	Npp.01A002850.1	Npp.01B003110.1|Npp.01B003220.1	-	-
Npp.01A002860.1	Npp.01A002860.1	Npp.01B003120.1|Npp.01B003230.1	-	-
Npp.01A002870.1	Npp.01A002870.1	Npp.01B003250.1	Npp.01C003090.1	-
Npp.01A002890.1	Npp.01A002890.1|Npp.01A002880.1	Npp.01B003130.1|Npp.01B003240.1	Npp.01C003100.1	-
Npp.01A002900.1	Npp.01A002900.1	Npp.01B003260.1	Npp.01C003080.1	-
Npp.01A002910.1	Npp.01A002910.1	Npp.01B003270.1	Npp.01C003070.1	-
Npp.01A002920.1	Npp.01A002920.1|Npp.04A039350.1	Npp.01B003280.1|Npp.01B003430.1	-	-
Npp.01A002930.1	Npp.01A002930.1	Npp.01B003290.1|Npp.01B003440.1	-	-
Npp.01A002940.1	Npp.01A002940.1	Npp.01B003300.1|Npp.01B003450.1	-	-
Npp.01A002950.1	Npp.01A002950.1	Npp.01B003310.1|Npp.01B003460.1	-	-
Npp.01A002960.1	Npp.01A002960.1	Npp.01B003320.1|Npp.01B003470.1	-	-
Npp.01A002970.1	Npp.01A002970.1	Npp.01B003330.1|Npp.01B003480.1	-	-
Npp.01A002980.1	Npp.01A002980.1	Npp.01B003350.1|Npp.01B003500.1	-	-
Npp.01A003000.1	Npp.01A003000.1	Npp.01B003360.1|Npp.01B003510.1	-	Npp.04D005390.1
Npp.01A003020.1	Npp.01A003020.1|Npp.01A002990.1	-	-	-
Npp.01A003030.1	Npp.01A003030.1|Npp.01A003010.1	Npp.01B003520.1	Npp.01C003110.1	-
Npp.01A003040.1	Npp.01A003040.1	Npp.01B003530.1	Npp.01C003120.1	-
Npp.01A003050.1	Npp.01A003050.1	Npp.01B003540.1	-	-
Npp.01A003060.1	Npp.01A003060.1	Npp.01B003550.1	Npp.01C003300.1	-
Npp.01A003070.1	Npp.01A003070.1	Npp.01B003560.1	-	-
Npp.01A003080.1	Npp.01A003080.1	Npp.01B003570.1	Npp.01C003310.1|Npp.01C011580.1	-
Npp.01A003090.1	Npp.01A003090.1	Npp.01B003580.1	Npp.01C003320.1	-
Npp.01A003100.1	Npp.01A003100.1	-	-	-
Npp.01A003110.1	Npp.01A003110.1	Npp.01B003590.1	Npp.01C003330.1|Npp.01C045480.1	-
Npp.01A003120.1	Npp.01A003120.1|Npp.01A003250.1	Npp.01B003600.1	Npp.01C003340.1	-
Npp.01A003140.1	Npp.01A003140.1|Npp.01A003270.1	-	-	-
Npp.01A003150.1	Npp.01A003150.1	Npp.01B003630.1	Npp.01C003350.1	Npp.ctg122135|Npp.10D017390.1
Npp.01A003160.1	Npp.01A003160.1	Npp.01B003640.1	Npp.01C003360.1	-
Npp.01A003170.1	Npp.01A003170.1	-	-	Npp.01D008090.1
Npp.01A003180.1	Npp.01A003180.1	Npp.01B003650.1	Npp.01C003370.1	-
Npp.01A003190.1	Npp.01A003190.1	Npp.01B003660.1	-	-
Npp.01A003200.1	Npp.01A003200.1|Npp.01A003540.1	Npp.01B004890.1	Npp.01C004120.1|Npp.10C007810.1	-
Npp.01A003210.1	Npp.01A003210.1	Npp.01B003670.1	Npp.01C003380.1	-
Npp.01A003220.1	Npp.01A003220.1	Npp.01B003680.1	Npp.01C003390.1|Npp.01C022990.1|Npp.04C026280.1	-
Npp.01A003230.1	Npp.01A003230.1|Npp.01A003240.1	Npp.01B003840.1|Npp.01B004180.1	Npp.01C003480.1|Npp.01C003410.1	-
Npp.01A003260.1	Npp.01A003260.1|Npp.01A003130.1	-	-	Npp.01D011110.1
Npp.01A003290.1	Npp.01A003290.1	Npp.01B002440.1	Npp.01C002440.1	-
Npp.01A003310.1	Npp.01A003310.1|Npp.01A003300.1	-	-	-
Npp.01A003320.1	Npp.01A003320.1	Npp.01B054100.1	-	-
Npp.01A003330.1	Npp.01A003330.1	Npp.01B004680.1|Npp.06B012500.1	Npp.01C003920.1	-
Npp.01A003340.1	Npp.01A003340.1	Npp.01B004690.1	Npp.01C003930.1	-
Npp.01A003350.1	Npp.01A003350.1|Npp.10A014300.1	Npp.01B004700.1	Npp.01C003940.1	-
Npp.01A003360.1	Npp.01A003360.1	Npp.01B004710.1	Npp.01C003950.1	-
Npp.01A003370.1	Npp.01A003370.1	Npp.01B004720.1	Npp.01C003960.1	-
Npp.01A003380.1	Npp.01A003380.1	Npp.01B004730.1	Npp.01C003970.1	-
Npp.01A003390.1	Npp.01A003390.1	Npp.01B004740.1	Npp.01C003980.1	-
Npp.01A003400.1	Npp.01A003400.1	Npp.01B004750.1	Npp.01C003990.1	-
Npp.01A003410.1	Npp.01A003410.1	Npp.01B004760.1	Npp.01C004000.1	-
Npp.01A003420.1	Npp.01A003420.1	Npp.01B004770.1	Npp.01C004010.1	-
Npp.01A003430.1	Npp.01A003430.1	Npp.01B004780.1	Npp.01C004020.1	-
Npp.01A003450.1	Npp.01A003450.1	Npp.01B004790.1	Npp.01C004030.1	-
Npp.01A003460.1	Npp.01A003460.1	Npp.01B004800.1	Npp.01C004040.1	-
Npp.01A003470.1	Npp.01A003470.1	Npp.01B004810.1	Npp.01C004050.1	-
Npp.01A003480.1	Npp.01A003480.1	Npp.01B004820.1	Npp.01C004060.1	Npp.07D003850.1
Npp.01A003490.1	Npp.01A003490.1	Npp.01B004830.1	Npp.01C004070.1	-
Npp.01A003500.1	Npp.01A003500.1	Npp.01B004850.1|Npp.01B004840.1	Npp.01C004080.1	-
Npp.01A003510.1	Npp.01A003510.1	-	Npp.01C004090.1	-
Npp.01A003520.1	Npp.01A003520.1	Npp.01B004860.1	Npp.01C004100.1	-
Npp.01A003530.1	Npp.01A003530.1|Npp.04A001420.1	Npp.01B004870.1|Npp.01B004880.1|Npp.01B003410.1	Npp.01C004110.1	-
Npp.01A003550.1	Npp.01A003550.1	Npp.01B004900.1	Npp.01C004130.1	-
Npp.01A003560.1	Npp.01A003560.1	Npp.01B004910.1	Npp.01C004140.1	-
Npp.01A003570.1	Npp.01A003570.1	Npp.01B004920.1	Npp.01C004150.1	-
Npp.01A003580.1	Npp.01A003580.1	Npp.01B004930.1|Npp.09B018320.1	Npp.01C004160.1	-
Npp.01A003590.1	Npp.01A003590.1	Npp.01B004940.1	Npp.01C004170.1	-
Npp.01A003600.1	Npp.01A003600.1|Npp.02A012170.1	Npp.01B004950.1	Npp.01C004200.1|Npp.01C004190.1	-
Npp.01A003610.1	Npp.01A003610.1	Npp.01B004970.1|Npp.01B004980.1	Npp.01C004210.1	-
Npp.01A003620.1	Npp.01A003620.1	Npp.01B004990.1	Npp.01C004220.1	-
Npp.01A003630.1	Npp.01A003630.1	Npp.01B005000.1	Npp.01C004230.1	-
Npp.01A003640.1	Npp.01A003640.1	Npp.01B005010.1	Npp.01C004240.1	Npp.05D024410.1
Npp.01A003650.1	Npp.01A003650.1	-	-	-
Npp.01A003660.1	Npp.01A003660.1	Npp.01B005020.1	Npp.01C004250.1	-
Npp.01A003670.1	Npp.01A003670.1	Npp.01B005040.1	Npp.01C004270.1	-
Npp.01A003680.1	Npp.01A003680.1	Npp.01B005050.1	Npp.01C004280.1	-
Npp.01A003690.1	Npp.01A003690.1	Npp.01B005060.1	Npp.01C004290.1	-
Npp.01A003700.1	Npp.01A003700.1	Npp.01B005070.1	-	-
Npp.01A003710.1	Npp.01A003710.1	Npp.01B005080.1	Npp.01C004300.1|Npp.01C004310.1	-
Npp.01A003720.1	Npp.01A003720.1	Npp.01B005090.1	Npp.01C004320.1	-
Npp.01A003730.1	Npp.01A003730.1	Npp.01B005100.1	Npp.01C004330.1	-
Npp.01A003740.1	Npp.01A003740.1	Npp.01B005120.1	Npp.01C004350.1	-
Npp.01A003750.1	Npp.01A003750.1	Npp.01B005150.1	Npp.01C004370.1	-
Npp.01A003760.1	Npp.01A003760.1	-	Npp.01C004380.1	-
Npp.01A003770.1	Npp.01A003770.1	-	Npp.01C017540.1	Npp.01D018080.1
Npp.01A003790.1	Npp.01A003790.1	Npp.01B003690.1|Npp.01B003700.1|Npp.01B003730.1|Npp.01B003740.1|Npp.01B003830.1|Npp.01B003850.1	Npp.01C002310.1|Npp.01C003400.1|Npp.01C003440.1|Npp.01C003450.1|Npp.01C003460.1	-
Npp.01A003800.1	Npp.01A003800.1	Npp.01B005190.1	Npp.01C004390.1	-
Npp.01A003810.1	Npp.01A003810.1	Npp.01B005180.1	Npp.01C004400.1	-
Npp.01A003820.1	Npp.01A003820.1	Npp.01B005170.1	Npp.01C004410.1	-
Npp.01A003830.1	Npp.01A003830.1	-	Npp.01C004420.1	-
Npp.01A003840.1	Npp.01A003840.1	Npp.01B005160.1	Npp.01C004440.1|Npp.01C004430.1	-
Npp.01A003850.1	Npp.01A003850.1|Npp.04A039260.1	-	Npp.01C004450.1	-
Npp.01A003870.1	Npp.01A003870.1	Npp.01B005210.1	Npp.01C023670.1	-
Npp.01A003890.1	Npp.01A003890.1	Npp.01B005240.1	-	-
Npp.01A003900.1	Npp.01A003900.1	Npp.01B005250.1	Npp.01C004520.1	-
Npp.01A003910.1	Npp.01A003910.1	Npp.01B005260.1	Npp.01C004510.1	-
Npp.01A003920.1	Npp.01A003920.1|Npp.01A004000.1|Npp.01A004010.1|Npp.01A004020.1|Npp.01A004030.1|Npp.01A004040.1	Npp.01B005270.1|Npp.01B005360.1|Npp.01B005370.1|Npp.01B005390.1|Npp.01B005400.1|Npp.01B005410.1	Npp.01C004540.1|Npp.01C004550.1|Npp.01C004560.1|Npp.01C004570.1|Npp.01C004580.1	Npp.01D032840.1
Npp.01A003930.1	Npp.01A003930.1	Npp.01B005290.1	-	-
Npp.01A003940.1	Npp.01A003940.1	Npp.01B005300.1	Npp.01C004480.1	-
Npp.01A003970.1	Npp.01A003970.1|Npp.01A003980.1	-	Npp.01C004460.1	-
Npp.01A003990.1	Npp.01A003990.1	Npp.01B005350.1	Npp.01C004530.1	-
Npp.01A004050.1	Npp.01A004050.1	Npp.01B005380.1	Npp.01C004500.1	-
Npp.01A004060.1	Npp.01A004060.1	Npp.01B005420.1	-	-
Npp.01A004070.1	Npp.01A004070.1	Npp.01B005430.1	-	-
Npp.01A004080.1	Npp.01A004080.1	Npp.01B005440.1|Npp.08B016400.1	-	-
Npp.01A004090.1	Npp.01A004090.1	Npp.01B005450.1	Npp.05C007980.1	-
Npp.01A004100.1	Npp.01A004100.1	Npp.01B005460.1	-	Npp.09D000080.1
Npp.01A004110.1	Npp.01A004110.1	Npp.01B005470.1	Npp.01C004590.1	-
Npp.01A004120.1	Npp.01A004120.1	Npp.01B005480.1	Npp.01C004600.1	-
Npp.01A004130.1	Npp.01A004130.1	-	Npp.01C004610.1	-
Npp.01A004140.1	Npp.01A004140.1|Npp.01A027960.1	Npp.01B005490.1	Npp.01C004620.1	-
Npp.01A004150.1	Npp.01A004150.1	-	-	-
Npp.01A004160.1	Npp.01A004160.1	Npp.01B005500.1	-	-
Npp.01A004170.1	Npp.01A004170.1	Npp.01B005510.1	Npp.01C004630.1	-
Npp.01A004180.1	Npp.01A004180.1	Npp.01B005540.1|Npp.01B005520.1	Npp.01C004640.1	Npp.01D014170.1
Npp.01A004190.1	Npp.01A004190.1|Npp.01A003950.1	Npp.01B005560.1|Npp.01B005550.1|Npp.03B002480.1	Npp.01C004660.1	-
Npp.01A004200.1	Npp.01A004200.1	Npp.01B050080.1|Npp.01B036970.1	-	Npp.01D038240.1
Npp.01A004210.1	Npp.01A004210.1	-	Npp.01C001350.1	-
Npp.01A004220.1	Npp.01A004220.1	-	Npp.01C004670.1	-
Npp.01A004230.1	Npp.01A004230.1	Npp.01B005570.1|Npp.04B029280.1	Npp.01C004680.1	-
Npp.01A004240.1	Npp.01A004240.1	-	-	-
Npp.01A004250.1	Npp.01A004250.1	-	Npp.01C004700.1	-
Npp.01A004260.1	Npp.01A004260.1	Npp.01B005590.1	Npp.01C004710.1|Npp.05C007960.1	-
Npp.01A004270.1	Npp.01A004270.1	Npp.01B005600.1	Npp.01C004720.1	-
Npp.01A004280.1	Npp.01A004280.1	Npp.01B005610.1	Npp.01C004730.1	-
Npp.01A004290.1	Npp.01A004290.1	Npp.01B015950.1|Npp.01B003620.1	-	Npp.01D010540.1
Npp.01A004300.1	Npp.01A004300.1	-	Npp.01C004740.1	-
Npp.01A004310.1	Npp.01A004310.1	-	Npp.01C004750.1|Npp.01C004770.1	-
Npp.01A004320.1	Npp.01A004320.1	-	Npp.01C004760.1	-
Npp.01A004330.1	Npp.01A004330.1	-	Npp.01C004780.1	-
Npp.01A004340.1	Npp.01A004340.1	Npp.01B005620.1	Npp.01C004800.1	-
Npp.01A004350.1	Npp.01A004350.1|Npp.01A016550.1	Npp.01B011130.1	Npp.01C038510.1	Npp.01D032520.1
Npp.01A004360.1	Npp.01A004360.1	Npp.01B027140.1	Npp.01C006210.1	Npp.01D019420.1
Npp.01A004370.1	Npp.01A004370.1|Npp.01A003880.1	Npp.01B042110.1	Npp.01C036000.1|Npp.01C036180.1	Npp.01D029090.1
Npp.01A004380.1	Npp.01A004380.1|Npp.01A004400.1	Npp.01B005640.1	Npp.01C004820.1	-
Npp.01A004410.1	Npp.01A004410.1	Npp.01B005650.1	Npp.01C004830.1	-
Npp.01A004420.1	Npp.01A004420.1	Npp.01B005660.1|Npp.07B010030.1	Npp.01C004840.1	-
Npp.01A004430.1	Npp.01A004430.1	Npp.01B005670.1|Npp.04B029140.1	Npp.01C004850.1	-
Npp.01A004440.1	Npp.01A004440.1	Npp.01B005680.1	Npp.01C004860.1	-
Npp.01A004450.1	Npp.01A004450.1	-	Npp.01C004900.1	-
Npp.01A004460.1	Npp.01A004460.1	Npp.01B005700.1	Npp.01C004880.1	-
Npp.01A004470.1	Npp.01A004470.1	-	Npp.01C004890.1	-
Npp.01A004480.1	Npp.01A004480.1	Npp.01B005690.1	Npp.01C004870.1|Npp.10C012870.1	-
Npp.01A004490.1	Npp.01A004490.1	Npp.01B005710.1	Npp.01C004910.1	-
Npp.01A004500.1	Npp.01A004500.1	Npp.01B005720.1	Npp.01C004920.1	-
Npp.01A004510.1	Npp.01A004510.1	Npp.01B005730.1	Npp.01C004930.1	-
Npp.01A004520.1	Npp.01A004520.1	Npp.01B005740.1	Npp.01C004940.1	-
Npp.01A004530.1	Npp.01A004530.1	Npp.01B005750.1|Npp.04B023410.1	Npp.01C004950.1	-
Npp.01A004540.1	Npp.01A004540.1	Npp.01B005760.1	Npp.01C004960.1|Npp.08C006220.1	-
Npp.01A004550.1	Npp.01A004550.1	Npp.01B005770.1	Npp.01C004970.1	-
Npp.01A004560.1	Npp.01A004560.1	Npp.01B005780.1	Npp.01C004980.1	-
Npp.01A004570.1	Npp.01A004570.1	Npp.01B005790.1|Npp.02B008970.1	Npp.01C004990.1	-
Npp.01A004580.1	Npp.01A004580.1	Npp.01B005840.1	Npp.07C010710.1	-
Npp.01A004590.1	Npp.01A004590.1	Npp.01B005850.1	Npp.01C005050.1	-
Npp.01A004600.1	Npp.01A004600.1	-	Npp.01C005070.1	-
Npp.01A004610.1	Npp.01A004610.1	Npp.01B005860.1	Npp.01C005080.1	-
Npp.01A004620.1	Npp.01A004620.1	Npp.01B005880.1	-	-
Npp.01A004630.1	Npp.01A004630.1	Npp.01B005900.1|Npp.08B006690.1	Npp.01C005110.1	-
Npp.01A004640.1	Npp.01A004640.1	-	Npp.01C005090.1	-
Npp.01A004650.1	Npp.01A004650.1|Npp.01A004690.1	-	Npp.01C005120.1|Npp.01C000240.1	-
Npp.01A004660.1	Npp.01A004660.1|Npp.01A004700.1	Npp.01B005910.1	Npp.01C005130.1	-
Npp.01A004670.1	Npp.01A004670.1|Npp.01A004710.1|Npp.04A017580.1	Npp.01B005920.1	Npp.01C005140.1	Npp.01D003780.1
Npp.01A004680.1	Npp.01A004680.1|Npp.01A004720.1	Npp.01B005930.1	-	Npp.01D003770.1
Npp.01A004730.1	Npp.01A004730.1|Npp.01A028250.1	-	Npp.01C001890.1|Npp.09C023980.1	-
Npp.01A004740.1	Npp.01A004740.1|Npp.01A028260.1	-	Npp.01C001900.1	-
Npp.01A004760.1	Npp.01A004760.1	-	Npp.01C001870.1	-
Npp.01A004770.1	Npp.01A004770.1	-	Npp.01C001880.1|Npp.01C026340.1	Npp.01D036830.1
Npp.01A004780.1	Npp.01A004780.1	-	Npp.01C001860.1	-
Npp.01A004790.1	Npp.01A004790.1	-	Npp.01C001850.1	Npp.06D023370.1
Npp.01A004800.1	Npp.01A004800.1	-	Npp.01C001840.1	-
Npp.01A004810.1	Npp.01A004810.1	-	Npp.01C001830.1	-
Npp.01A004820.1	Npp.01A004820.1	-	Npp.01C001820.1	-
Npp.01A004830.1	Npp.01A004830.1	-	Npp.01C001810.1	-
Npp.01A004840.1	Npp.01A004840.1	Npp.01B006100.1	Npp.01C005400.1|Npp.01C005440.1	-
Npp.01A004850.1	Npp.01A004850.1	Npp.01B006090.1	Npp.01C005390.1	-
Npp.01A004860.1	Npp.01A004860.1	Npp.01B006080.1	Npp.01C005380.1	-
Npp.01A004870.1	Npp.01A004870.1	-	Npp.01C005370.1	-
Npp.01A004890.1	Npp.01A004890.1|Npp.01A004880.1	-	-	-
Npp.01A004900.1	Npp.01A004900.1	Npp.01B006070.1	Npp.01C005360.1	-
Npp.01A004910.1	Npp.01A004910.1|Npp.01A004970.1	Npp.01B006060.1|Npp.07B018790.1	-	Npp.01D003510.1
Npp.01A004920.1	Npp.01A004920.1	Npp.01B006050.1	-	Npp.01D003520.1
Npp.01A004930.1	Npp.01A004930.1|Npp.04A012770.1	Npp.01B006040.1	Npp.10C007410.1	Npp.01D003530.1
Npp.01A004940.1	Npp.01A004940.1	-	-	-
Npp.01A004950.1	Npp.01A004950.1	Npp.01B006030.1|Npp.01B006020.1	-	Npp.01D003540.1
Npp.01A004980.1	Npp.01A004980.1|Npp.01A004960.1	Npp.01B006010.1	-	Npp.01D003550.1
Npp.01A004990.1	Npp.01A004990.1	Npp.01B005990.1	-	Npp.01D003570.1
Npp.01A005000.1	Npp.01A005000.1	Npp.01B006120.1	Npp.01C005420.1	-
Npp.01A005010.1	Npp.01A005010.1	Npp.01B006130.1	Npp.01C005480.1|Npp.01C005430.1	-
Npp.01A005020.1	Npp.01A005020.1	Npp.01B006150.1	-	-
Npp.01A005030.1	Npp.01A005030.1	Npp.01B036560.1	-	-
Npp.01A005040.1	Npp.01A005040.1	Npp.01B006140.1	Npp.01C005500.1	-
Npp.01A005050.1	Npp.01A005050.1	Npp.01B006170.1	Npp.01C005510.1	-
Npp.01A005060.1	Npp.01A005060.1	Npp.01B006190.1	-	-
Npp.01A005070.1	Npp.01A005070.1	Npp.01B006180.1	Npp.01C005520.1	-
Npp.01A005080.1	Npp.01A005080.1|Npp.01A036330.1	-	Npp.01C005540.1	-
Npp.01A005090.1	Npp.01A005090.1	Npp.01B006210.1	Npp.01C005550.1	-
Npp.01A005100.1	Npp.01A005100.1|Npp.01A022190.1	Npp.01B006220.1	Npp.01C005560.1	-
Npp.01A005110.1	Npp.01A005110.1	Npp.01B006230.1	Npp.01C005570.1	-
Npp.01A005120.1	Npp.01A005120.1|Npp.01A028580.1|Npp.01A030350.1|Npp.01A039650.1	-	-	Npp.01D013390.1|Npp.01D035090.1|Npp.01D018310.1
Npp.01A005140.1	Npp.01A005140.1	Npp.01B006250.1	Npp.01C005590.1	-
Npp.01A005160.1	Npp.01A005160.1|Npp.04A027510.1	Npp.01B006260.1	Npp.01C005600.1	-
Npp.01A005170.1	Npp.01A005170.1	Npp.01B006270.1|Npp.06B003770.1	Npp.01C005610.1	-
Npp.01A005180.1	Npp.01A005180.1	Npp.01B006280.1	Npp.01C005620.1	-
Npp.01A005190.1	Npp.01A005190.1	-	Npp.01C005630.1	-
Npp.01A005210.1	Npp.01A005210.1	Npp.01B006290.1|Npp.04B017420.1	Npp.01C005640.1	-
Npp.01A005220.1	Npp.01A005220.1	-	Npp.01C005650.1	-
Npp.01A005230.1	Npp.01A005230.1	Npp.01B006300.1	Npp.01C005670.1	-
Npp.01A005240.1	Npp.01A005240.1	Npp.01B006310.1	Npp.01C005680.1	-
Npp.01A005250.1	Npp.01A005250.1	Npp.01B006320.1	Npp.01C005690.1	-
Npp.01A005260.1	Npp.01A005260.1	Npp.01B006330.1	Npp.01C005700.1	-
Npp.01A005270.1	Npp.01A005270.1|Npp.01A016720.1|Npp.01A026620.1|Npp.01A035540.1|Npp.01A007340.1	Npp.01B004540.1|Npp.01B016450.1|Npp.01B035380.1	Npp.01C011320.1|Npp.01C035420.1|Npp.01C037300.1|Npp.01C001990.1	Npp.01D012710.1|Npp.01D020720.1|Npp.01D035280.1
Npp.01A005280.1	Npp.01A005280.1	Npp.01B006340.1	Npp.01C005710.1	-
Npp.01A005290.1	Npp.01A005290.1|Npp.05A000850.1	Npp.01B006360.1	Npp.01C005720.1	Npp.01D009490.1
Npp.01A005300.1	Npp.01A005300.1	Npp.01B006370.1	Npp.01C005730.1	Npp.02D002650.1
Npp.01A005310.1	Npp.01A005310.1	-	Npp.01C005740.1	-
Npp.01A005320.1	Npp.01A005320.1	Npp.03B014470.1	Npp.01C005750.1	-
Npp.01A005340.1	Npp.01A005340.1	Npp.01B006880.1	-	Npp.01D028990.1|Npp.07D009190.1
Npp.01A005350.1	Npp.01A005350.1|Npp.01A005370.1	Npp.01B006860.1	-	-
Npp.01A005360.1	Npp.01A005360.1|Npp.01A005330.1	-	-	-
Npp.01A005380.1	Npp.01A005380.1	Npp.01B006870.1	-	Npp.04D013050.1
Npp.01A005390.1	Npp.01A005390.1	Npp.01B006890.1	Npp.01C005760.1	-
Npp.01A005400.1	Npp.01A005400.1	Npp.01B006900.1	Npp.01C005770.1|Npp.01C011550.1	-
Npp.01A005410.1	Npp.01A005410.1	Npp.01B006910.1	Npp.01C005780.1	-
Npp.01A005420.1	Npp.01A005420.1	Npp.01B006920.1	Npp.01C005790.1	-
Npp.01A005430.1	Npp.01A005430.1	Npp.01B006930.1	Npp.01C005800.1	-
Npp.01A005440.1	Npp.01A005440.1	Npp.01B006940.1	Npp.01C005810.1	-
Npp.01A005450.1	Npp.01A005450.1	Npp.01B006950.1	Npp.01C005820.1	-
Npp.01A005460.1	Npp.01A005460.1	Npp.01B006960.1|Npp.04B009250.1	Npp.01C005830.1	-
Npp.01A005470.1	Npp.01A005470.1	Npp.01B006970.1	Npp.01C005840.1	-
Npp.01A005480.1	Npp.01A005480.1	Npp.01B006980.1	Npp.01C005850.1	-
Npp.01A005490.1	Npp.01A005490.1	Npp.01B006990.1	Npp.01C005860.1	-
Npp.01A005510.1	Npp.01A005510.1|Npp.01A005500.1	Npp.01B007000.1	Npp.01C005870.1	-
Npp.01A005520.1	Npp.01A005520.1|Npp.01A024370.1	Npp.01B006840.1|Npp.01B007020.1|Npp.01B048630.1|Npp.01B024110.1|Npp.07B005780.1	Npp.01C005900.1|Npp.01C043030.1|Npp.01C019610.1|Npp.05C013620.1|Npp.05C013610.1	Npp.01D011250.1
Npp.01A005530.1	Npp.01A005530.1	Npp.01B007010.1	Npp.01C005910.1|Npp.01C005880.1	-
Npp.01A005540.1	Npp.01A005540.1	Npp.01B007140.1	Npp.01C005930.1	-
Npp.01A005550.1	Npp.01A005550.1	Npp.01B007030.1	-	-
Npp.01A005560.1	Npp.01A005560.1|Npp.01A005570.1	Npp.01B007130.1	Npp.01C005940.1	-
Npp.01A005580.1	Npp.01A005580.1	-	Npp.01C005950.1	Npp.10D022570.1
Npp.01A005590.1	Npp.01A005590.1	-	Npp.01C005960.1	-
Npp.01A005600.1	Npp.01A005600.1	-	Npp.01C013690.1|Npp.01C041890.1	-
Npp.01A005610.1	Npp.01A005610.1	Npp.01B007120.1	Npp.06C012290.1	-
Npp.01A005620.1	Npp.01A005620.1|Npp.01A012500.1|Npp.01A014430.1	Npp.01B007090.1|Npp.01B015970.1	-	Npp.01D013640.1
Npp.01A005630.1	Npp.01A005630.1	-	Npp.01C005970.1	-
Npp.01A005640.1	Npp.01A005640.1	Npp.01B007110.1	Npp.01C005980.1	-
Npp.01A005650.1	Npp.01A005650.1	Npp.01B007080.1	Npp.01C005990.1	-
Npp.01A005660.1	Npp.01A005660.1	Npp.01B007070.1	Npp.01C006000.1	-
Npp.01A005670.1	Npp.01A005670.1	Npp.01B007060.1	Npp.01C006010.1	-
Npp.01A005680.1	Npp.01A005680.1	-	Npp.01C006020.1	-
Npp.01A005690.1	Npp.01A005690.1	Npp.01B007050.1	Npp.01C006030.1	-
Npp.01A005700.1	Npp.01A005700.1	Npp.01B007040.1|Npp.02B014070.1	Npp.01C006040.1	-
Npp.01A005710.1	Npp.01A005710.1	-	Npp.01C006050.1|Npp.10C009300.1	-
Npp.01A005720.1	Npp.01A005720.1	-	Npp.01C006060.1	Npp.06D023670.1
Npp.01A005730.1	Npp.01A005730.1	-	Npp.01C006070.1|Npp.02C024600.1	-
Npp.01A005740.1	Npp.01A005740.1	-	Npp.01C006080.1	-
Npp.01A005750.1	Npp.01A005750.1	-	Npp.01C006090.1	-
Npp.01A005760.1	Npp.01A005760.1|Npp.01A005770.1	-	Npp.01C006100.1|Npp.01C006110.1|Npp.01C006120.1	-
Npp.01A005780.1	Npp.01A005780.1	-	Npp.10C009390.1	-
Npp.01A005790.1	Npp.01A005790.1	-	Npp.01C006140.1	-
Npp.01A005800.1	Npp.01A005800.1	Npp.01B052720.1	-	-
Npp.01A005820.1	Npp.01A005820.1	Npp.01B007190.1	Npp.01C006150.1|Npp.09C006650.1	-
Npp.01A005830.1	Npp.01A005830.1|Npp.01A005840.1|Npp.01A005850.1|Npp.01A005880.1|Npp.01A005890.1|Npp.01A005900.1|Npp.01A005910.1	Npp.01B007150.1|Npp.01B007160.1|Npp.01B007170.1|Npp.01B007200.1	-	Npp.01D020540.1
Npp.01A005870.1	Npp.01A005870.1|Npp.01A005930.1	Npp.01B007180.1	-	Npp.07D012260.1
Npp.01A005920.1	Npp.01A005920.1|Npp.01A005860.1	-	-	-
Npp.01A005940.1	Npp.01A005940.1	Npp.01B007210.1	Npp.01C006160.1	-
Npp.01A005950.1	Npp.01A005950.1	Npp.01B007220.1	Npp.01C006170.1	-
Npp.01A005960.1	Npp.01A005960.1	Npp.01B007230.1	Npp.01C006180.1	-
Npp.01A005970.1	Npp.01A005970.1	Npp.01B007240.1	Npp.01C006190.1|Npp.03C037620.1	Npp.01D023260.1
Npp.01A005980.1	Npp.01A005980.1	Npp.01B007260.1	Npp.01C006200.1	Npp.05D000660.1
Npp.01A005990.1	Npp.01A005990.1|Npp.03A032220.1	Npp.01B007270.1	Npp.01C006220.1	-
Npp.01A006000.1	Npp.01A006000.1	Npp.01B007280.1	Npp.01C006230.1	-
Npp.01A006010.1	Npp.01A006010.1|Npp.01A006020.1	Npp.01B007290.1	Npp.01C006240.1	Npp.02D000500.1
Npp.01A006030.1	Npp.01A006030.1	Npp.01B007300.1	Npp.01C006250.1	-
Npp.01A006040.1	Npp.01A006040.1	Npp.01B007310.1	-	-
Npp.01A006050.1	Npp.01A006050.1|Npp.01A036590.1	-	Npp.01C006260.1	-
Npp.01A006060.1	Npp.01A006060.1	-	Npp.01C006270.1	-
Npp.01A006070.1	Npp.01A006070.1	Npp.01B007350.1	Npp.01C006280.1	-
Npp.01A006080.1	Npp.01A006080.1	Npp.01B007370.1	Npp.01C006290.1	-
Npp.01A006090.1	Npp.01A006090.1	Npp.01B007380.1	Npp.01C006300.1	-
Npp.01A006100.1	Npp.01A006100.1	Npp.01B007390.1	Npp.01C006310.1	Npp.01D033110.1|Npp.08D018450.1
Npp.01A006110.1	Npp.01A006110.1	Npp.01B007410.1	Npp.01C006320.1	-
Npp.01A006120.1	Npp.01A006120.1	Npp.01B007420.1	Npp.01C006330.1	-
Npp.01A006130.1	Npp.01A006130.1	Npp.01B007430.1	Npp.01C006340.1	-
Npp.01A006140.1	Npp.01A006140.1	Npp.01B007440.1	Npp.01C006350.1	-
Npp.01A006150.1	Npp.01A006150.1	Npp.01B007460.1	Npp.01C006370.1	-
Npp.01A006160.1	Npp.01A006160.1	Npp.01B007470.1	Npp.01C006380.1	-
Npp.01A006170.1	Npp.01A006170.1	-	Npp.01C006390.1	-
Npp.01A006180.1	Npp.01A006180.1	Npp.01B007480.1	Npp.01C006400.1	-
Npp.01A006190.1	Npp.01A006190.1	Npp.01B007490.1	Npp.01C006410.1	-
Npp.01A006200.1	Npp.01A006200.1	Npp.01B007500.1	Npp.01C006420.1	-
Npp.01A006210.1	Npp.01A006210.1	-	Npp.01C006430.1	-
Npp.01A006220.1	Npp.01A006220.1	Npp.01B007510.1	Npp.04C029260.1	-
Npp.01A006230.1	Npp.01A006230.1	Npp.01B007520.1	-	-
Npp.01A006240.1	Npp.01A006240.1	Npp.01B007530.1	Npp.01C006440.1	-
Npp.01A006250.1	Npp.01A006250.1	Npp.01B007540.1	Npp.01C006450.1	-
Npp.01A006260.1	Npp.01A006260.1	Npp.01B007550.1	Npp.01C006460.1	-
Npp.01A006270.1	Npp.01A006270.1	Npp.01B007560.1	Npp.01C006470.1	-
Npp.01A006280.1	Npp.01A006280.1	Npp.01B007570.1	Npp.01C006490.1|Npp.01C006480.1	-
Npp.01A006290.1	Npp.01A006290.1	-	Npp.01C006530.1|Npp.01C006540.1	-
Npp.01A006300.1	Npp.01A006300.1	Npp.01B007590.1	Npp.01C006550.1	-
Npp.01A006310.1	Npp.01A006310.1	Npp.01B007600.1	Npp.01C006560.1	-
Npp.01A006320.1	Npp.01A006320.1	Npp.01B007610.1	Npp.01C006580.1	-
Npp.01A006330.1	Npp.01A006330.1	Npp.01B007620.1	Npp.01C006590.1	-
Npp.01A006340.1	Npp.01A006340.1	Npp.01B007630.1	Npp.01C006600.1	-
Npp.01A006350.1	Npp.01A006350.1	Npp.01B007650.1|Npp.01B007640.1	Npp.01C006610.1	-
Npp.01A006360.1	Npp.01A006360.1	Npp.01B007660.1	Npp.01C006620.1	-
Npp.01A006370.1	Npp.01A006370.1	Npp.01B007670.1	Npp.01C006630.1	-
Npp.01A006380.1	Npp.01A006380.1	-	Npp.01C006640.1	-
Npp.01A006390.1	Npp.01A006390.1	Npp.01B007680.1	Npp.01C006660.1|Npp.01C006650.1	-
Npp.01A006400.1	Npp.01A006400.1	Npp.01B007690.1	Npp.01C006670.1	-
Npp.01A006410.1	Npp.01A006410.1	-	-	Npp.01D031740.1
Npp.01A006420.1	Npp.01A006420.1	Npp.01B007700.1	Npp.01C006680.1	-
Npp.01A006430.1	Npp.01A006430.1	Npp.01B007710.1	Npp.01C006690.1	-
Npp.01A006440.1	Npp.01A006440.1|Npp.07A016130.1	Npp.01B007720.1	Npp.01C006700.1	-
Npp.01A006460.1	Npp.01A006460.1|Npp.01A006470.1|Npp.01A006560.1	-	-	Npp.01D006100.1
Npp.01A006480.1	Npp.01A006480.1	Npp.01B007740.1	Npp.01C006720.1|Npp.09C016930.1	Npp.01D001310.1
Npp.01A006490.1	Npp.01A006490.1	Npp.01B007750.1	Npp.01C006730.1	Npp.01D001320.1
Npp.01A006500.1	Npp.01A006500.1	-	Npp.01C006740.1	Npp.01D001330.1
Npp.01A006510.1	Npp.01A006510.1	-	Npp.01C006750.1	Npp.01D001340.1
Npp.01A006520.1	Npp.01A006520.1|Npp.02A001130.1	-	Npp.01C006760.1	Npp.01D001350.1
Npp.01A006530.1	Npp.01A006530.1	-	Npp.01C006770.1	Npp.01D001360.1
Npp.01A006540.1	Npp.01A006540.1	-	Npp.01C006780.1	Npp.01D001370.1
Npp.01A006550.1	Npp.01A006550.1	-	Npp.01C006790.1	Npp.01D001380.1
Npp.01A006570.1	Npp.01A006570.1|Npp.01A006730.1|Npp.01A006740.1|Npp.01A020940.1	Npp.01B007950.1|Npp.01B008400.1	-	-
Npp.01A006580.1	Npp.01A006580.1	-	Npp.01C006810.1	Npp.01D001400.1
Npp.01A006590.1	Npp.01A006590.1	-	Npp.01C006820.1	Npp.01D001410.1
Npp.01A006610.1	Npp.01A006610.1|Npp.01A006630.1|Npp.01A006670.1	-	-	Npp.01D001430.1
Npp.01A006650.1	Npp.01A006650.1	Npp.01B011120.1	-	Npp.01D014950.1
Npp.01A006660.1	Npp.01A006660.1|Npp.01A006620.1|Npp.01A006600.1	-	Npp.01C006830.1	Npp.01D001420.1
Npp.01A006680.1	Npp.01A006680.1|Npp.01A006640.1	-	-	-
Npp.01A006690.1	Npp.01A006690.1	Npp.01B000320.1	-	Npp.01D001450.1
Npp.01A006700.1	Npp.01A006700.1|Npp.01A009990.1	Npp.01B007920.1|Npp.01B008430.1|Npp.01B012490.1	Npp.01C008700.1|Npp.01C012040.1	Npp.01D001260.1|Npp.09D003610.1
Npp.01A006710.1	Npp.01A006710.1	Npp.01B007930.1|Npp.01B008420.1	-	Npp.10D000830.1
Npp.01A006720.1	Npp.01A006720.1	Npp.01B007940.1|Npp.01B008410.1	-	-
Npp.01A006750.1	Npp.01A006750.1	Npp.01B007970.1|Npp.01B008390.1	-	-
Npp.01A006760.1	Npp.01A006760.1	Npp.01B007980.1|Npp.01B008380.1	-	-
Npp.01A006770.1	Npp.01A006770.1	Npp.01B007990.1|Npp.01B008370.1	-	-
Npp.01A006780.1	Npp.01A006780.1	Npp.01B008000.1|Npp.01B008360.1	-	-
Npp.01A006790.1	Npp.01A006790.1	Npp.01B008350.1|Npp.01B008010.1	-	-
Npp.01A006800.1	Npp.01A006800.1	Npp.01B008020.1|Npp.01B008340.1	-	-
Npp.01A006810.1	Npp.01A006810.1|Npp.01A031270.1	Npp.01B008030.1|Npp.01B008330.1	-	Npp.06D018640.1
Npp.01A006830.1	Npp.01A006830.1	Npp.01B008040.1|Npp.01B008320.1	-	-
Npp.01A006840.1	Npp.01A006840.1	Npp.01B008050.1|Npp.01B008310.1	-	-
Npp.01A006850.1	Npp.01A006850.1	Npp.01B008100.1	-	-
Npp.01A006860.1	Npp.01A006860.1	Npp.01B008110.1	Npp.01C000810.1	-
Npp.01A006870.1	Npp.01A006870.1	-	Npp.01C000800.1	-
Npp.01A006880.1	Npp.01A006880.1	-	Npp.01C008210.1	-
Npp.01A006890.1	Npp.01A006890.1|Npp.01A006900.1	Npp.01B008130.1	-	-
Npp.01A006910.1	Npp.01A006910.1|Npp.01A006920.1	Npp.01B008140.1	-	Npp.01D032990.1
Npp.01A006930.1	Npp.01A006930.1	Npp.01B008150.1	-	-
Npp.01A006940.1	Npp.01A006940.1	Npp.01B008160.1	-	-
Npp.01A006950.1	Npp.01A006950.1|Npp.01A007070.1	Npp.01B008170.1	-	-
Npp.01A006960.1	Npp.01A006960.1	Npp.01B008180.1|Npp.03B032820.1	-	-
Npp.01A006970.1	Npp.01A006970.1	Npp.01B008190.1	-	-
Npp.01A006980.1	Npp.01A006980.1	-	-	Npp.01D001540.1
Npp.01A006990.1	Npp.01A006990.1	Npp.01B008220.1|Npp.01B008210.1	-	Npp.01D001550.1|Npp.07D012010.1
Npp.01A007000.1	Npp.01A007000.1	-	Npp.01C014730.1	-
Npp.01A007010.1	Npp.01A007010.1	Npp.01B008230.1	-	-
Npp.01A007020.1	Npp.01A007020.1|Npp.09A014860.1	-	-	Npp.01D001530.1
Npp.01A007030.1	Npp.01A007030.1	Npp.01B008240.1|Npp.01B029570.1	-	Npp.01D001520.1
Npp.01A007040.1	Npp.01A007040.1	Npp.01B008250.1|Npp.03B004920.1	-	Npp.01D001510.1
Npp.01A007050.1	Npp.01A007050.1	Npp.01B008200.1	-	-
Npp.01A007060.1	Npp.01A007060.1	Npp.01B015390.1	-	-
Npp.01A007080.1	Npp.01A007080.1	-	-	Npp.01D001480.1
Npp.01A007090.1	Npp.01A007090.1|Npp.01A039240.1|Npp.08A001410.1	Npp.01B008440.1|Npp.01B000330.1|Npp.01B007910.1	-	Npp.01D001470.1|Npp.04D015570.1|Npp.06D004420.1
Npp.01A007100.1	Npp.01A007100.1	Npp.01B007900.1	Npp.10C014670.1	-
Npp.01A007110.1	Npp.01A007110.1	Npp.01B008450.1|Npp.01B007890.1	-	-
Npp.01A007120.1	Npp.01A007120.1|Npp.08A012630.1	Npp.01B008460.1|Npp.01B007880.1	-	-
Npp.01A007130.1	Npp.01A007130.1	Npp.01B008470.1|Npp.01B007860.1|Npp.01B007870.1	-	-
Npp.01A007140.1	Npp.01A007140.1	Npp.01B008480.1|Npp.01B007850.1	-	-
Npp.01A007150.1	Npp.01A007150.1	Npp.01B008500.1|Npp.01B007830.1	-	-
Npp.01A007160.1	Npp.01A007160.1	-	-	-
Npp.01A007170.1	Npp.01A007170.1|Npp.01A016570.1|Npp.01A016910.1	Npp.01B007820.1|Npp.01B008510.1|Npp.01B043190.1|Npp.01B043400.1	-	Npp.01D028640.1|Npp.01D028650.1
Npp.01A007180.1	Npp.01A007180.1	Npp.01B008540.1|Npp.01B007810.1	-	-
Npp.01A007190.1	Npp.01A007190.1	Npp.01B008550.1|Npp.01B007800.1|Npp.01B007790.1|Npp.01B008530.1	-	-
Npp.01A007200.1	Npp.01A007200.1	Npp.01B008560.1|Npp.01B007780.1	-	-
Npp.01A007210.1	Npp.01A007210.1	Npp.01B008570.1|Npp.01B007770.1	-	-
Npp.01A007230.1	Npp.01A007230.1	-	-	Npp.01D022740.1
Npp.01A007240.1	Npp.01A007240.1|Npp.01A007220.1	-	-	-
Npp.01A007290.1	Npp.01A007290.1	-	-	Npp.01D025850.1
Npp.01A007310.1	Npp.01A007310.1|Npp.01A007350.1	-	-	-
Npp.01A007320.1	Npp.01A007320.1|Npp.01A007300.1|Npp.01A007370.1	Npp.01B025340.1	-	-
Npp.01A007330.1	Npp.01A007330.1	Npp.01B005970.1	Npp.01C005340.1	Npp.01D003590.1|Npp.05D025450.1
Npp.01A007410.1	Npp.01A007410.1	Npp.01B008710.1|Npp.01B008830.1	-	-
Npp.01A007420.1	Npp.01A007420.1	Npp.01B008700.1|Npp.01B008820.1|Npp.01B008690.1	-	-
Npp.01A007430.1	Npp.01A007430.1	Npp.01B008660.1|Npp.01B008790.1	-	-
Npp.01A007440.1	Npp.01A007440.1	Npp.01B008780.1|Npp.01B008650.1	-	-
Npp.01A007450.1	Npp.01A007450.1|Npp.03A039460.1	Npp.01B008640.1|Npp.01B008770.1	-	-
Npp.01A007460.1	Npp.01A007460.1	Npp.01B008630.1|Npp.01B008760.1|Npp.08B002240.1	-	-
Npp.01A007470.1	Npp.01A007470.1	Npp.01B008620.1|Npp.01B008750.1	-	-
Npp.01A007480.1	Npp.01A007480.1	Npp.01B008610.1|Npp.01B008740.1	-	-
Npp.01A007490.1	Npp.01A007490.1	Npp.01B008590.1|Npp.01B008730.1	Npp.10C007790.1	-
Npp.01A007500.1	Npp.01A007500.1|Npp.01A007400.1	Npp.01B008720.1|Npp.01B008840.1	-	-
Npp.01A007520.1	Npp.01A007520.1	Npp.07B015100.1	-	-
Npp.01A007530.1	Npp.01A007530.1|Npp.01A007550.1	Npp.01B008860.1	-	Npp.01D021550.1|Npp.08D000380.1
Npp.01A007540.1	Npp.01A007540.1|Npp.01A007510.1	Npp.01B008850.1	-	-
Npp.01A007560.1	Npp.01A007560.1	Npp.01B030640.1	Npp.01C039010.1	-
Npp.01A007570.1	Npp.01A007570.1	Npp.01B008870.1	Npp.01C006840.1	-
Npp.01A007580.1	Npp.01A007580.1	Npp.01B008880.1	Npp.01C006850.1	-
Npp.01A007590.1	Npp.01A007590.1	Npp.01B008890.1	Npp.01C006860.1	-
Npp.01A007600.1	Npp.01A007600.1	Npp.01B008900.1	Npp.01C006870.1	-
Npp.01A007610.1	Npp.01A007610.1	Npp.01B008920.1	-	-
Npp.01A007620.1	Npp.01A007620.1|Npp.10A018310.1	Npp.01B008930.1	-	-
Npp.01A007630.1	Npp.01A007630.1|Npp.10A018300.1	Npp.01B008940.1	-	Npp.08D011620.1
Npp.01A007640.1	Npp.01A007640.1|Npp.10A018280.1	Npp.01B008950.1	-	-
Npp.01A007650.1	Npp.01A007650.1|Npp.10A018270.1	Npp.01B008960.1	-	-
Npp.01A007660.1	Npp.01A007660.1|Npp.10A018260.1	Npp.01B008970.1	-	-
Npp.01A007670.1	Npp.01A007670.1	-	-	-
Npp.01A007680.1	Npp.01A007680.1	Npp.01B008980.1	-	-
Npp.01A007690.1	Npp.01A007690.1|Npp.10A018240.1	Npp.01B008990.1	-	-
Npp.01A007700.1	Npp.01A007700.1|Npp.10A018230.1	Npp.01B009000.1	-	-
Npp.01A007710.1	Npp.01A007710.1|Npp.10A018220.1	Npp.01B009010.1	-	-
Npp.01A007720.1	Npp.01A007720.1|Npp.10A018210.1	Npp.01B009020.1	-	-
Npp.01A007730.1	Npp.01A007730.1	Npp.01B009030.1	-	-
Npp.01A007740.1	Npp.01A007740.1	Npp.01B009040.1	-	-
Npp.01A007750.1	Npp.01A007750.1	Npp.01B009050.1	-	-
Npp.01A007760.1	Npp.01A007760.1	Npp.01B009060.1|Npp.01B009180.1	-	-
Npp.01A007770.1	Npp.01A007770.1	Npp.01B009190.1	-	-
Npp.01A007780.1	Npp.01A007780.1	Npp.01B009070.1|Npp.01B009200.1	-	-
Npp.01A007790.1	Npp.01A007790.1	Npp.01B009100.1|Npp.01B009240.1	-	-
Npp.01A007800.1	Npp.01A007800.1|Npp.01A032490.1	Npp.01B009090.1	-	-
Npp.01A007820.1	Npp.01A007820.1	-	Npp.01C005580.1	-
Npp.01A007870.1	Npp.01A007870.1	Npp.01B009110.1|Npp.01B009250.1	-	Npp.07D007450.1
Npp.01A007880.1	Npp.01A007880.1	Npp.01B009260.1|Npp.01B015470.1	Npp.01C023980.1	-
Npp.01A007890.1	Npp.01A007890.1	Npp.01B009130.1|Npp.01B009270.1	-	-
Npp.01A007900.1	Npp.01A007900.1	Npp.01B009280.1	-	-
Npp.01A007920.1	Npp.01A007920.1	Npp.01B009150.1|Npp.01B009290.1	-	-
Npp.01A007930.1	Npp.01A007930.1	Npp.01B009160.1|Npp.01B009300.1	-	-
Npp.01A007940.1	Npp.01A007940.1	-	Npp.01C024140.1	Npp.01D022200.1
Npp.01A007950.1	Npp.01A007950.1	Npp.01B009170.1|Npp.01B009310.1	-	-
Npp.01A007960.1	Npp.01A007960.1|Npp.03A003660.1	Npp.01B009320.1	Npp.01C006880.1|Npp.10C004840.1	-
Npp.01A007970.1	Npp.01A007970.1	Npp.01B009330.1	Npp.01C006890.1	-
Npp.01A007980.1	Npp.01A007980.1	Npp.01B009340.1	Npp.01C006910.1	-
Npp.01A007990.1	Npp.01A007990.1	Npp.01B009350.1	Npp.01C006920.1	-
Npp.01A008000.1	Npp.01A008000.1|Npp.03A003650.1	Npp.01B009370.1	Npp.01C006930.1	Npp.01D016710.1
Npp.01A008010.1	Npp.01A008010.1	Npp.01B009380.1|Npp.02B008060.1	-	-
Npp.01A008020.1	Npp.01A008020.1	Npp.01B009390.1	Npp.01C006940.1	-
Npp.01A008030.1	Npp.01A008030.1	Npp.01B009400.1	Npp.01C006950.1	-
Npp.01A008040.1	Npp.01A008040.1	-	Npp.01C006960.1	-
Npp.01A008050.1	Npp.01A008050.1	Npp.01B009410.1	Npp.01C006970.1	-
Npp.01A008080.1	Npp.01A008080.1	-	Npp.05C015350.1	-
Npp.01A008090.1	Npp.01A008090.1	Npp.01B009420.1|Npp.09B010970.1|Npp.03B032270.1	Npp.01C006980.1	-
Npp.01A008100.1	Npp.01A008100.1	-	Npp.01C038020.1	-
Npp.01A008110.1	Npp.01A008110.1	Npp.01B009440.1	Npp.01C007000.1	-
Npp.01A008120.1	Npp.01A008120.1	Npp.01B009450.1	Npp.01C007010.1	-
Npp.01A008130.1	Npp.01A008130.1	Npp.01B009460.1	Npp.01C007020.1	-
Npp.01A008140.1	Npp.01A008140.1	Npp.01B012620.1	-	-
Npp.01A008150.1	Npp.01A008150.1	-	-	-
Npp.01A008160.1	Npp.01A008160.1	Npp.01B009470.1	Npp.01C007030.1	-
Npp.01A008170.1	Npp.01A008170.1	Npp.01B009480.1	Npp.01C007040.1|Npp.03C000470.1	-
Npp.01A008180.1	Npp.01A008180.1	Npp.01B009500.1	Npp.01C007060.1	-
Npp.01A008190.1	Npp.01A008190.1	Npp.01B009510.1	Npp.01C007070.1	-
Npp.01A008200.1	Npp.01A008200.1	Npp.01B009520.1	Npp.01C007080.1|Npp.05C007170.1	-
Npp.01A008210.1	Npp.01A008210.1|Npp.01A008220.1	Npp.01B009540.1|Npp.01B009550.1	Npp.01C007100.1|Npp.01C007110.1	-
Npp.01A008230.1	Npp.01A008230.1|Npp.01A008260.1	Npp.01B009560.1|Npp.01B009570.1	Npp.01C007120.1|Npp.01C007140.1|Npp.01C011640.1	-
Npp.01A008240.1	Npp.01A008240.1	Npp.01B009530.1	Npp.01C007090.1	-
Npp.01A008250.1	Npp.01A008250.1	-	Npp.01C007130.1	-
Npp.01A008270.1	Npp.01A008270.1	Npp.01B009580.1	Npp.01C007150.1	-
Npp.01A008280.1	Npp.01A008280.1	Npp.01B009590.1	Npp.01C007160.1	-
Npp.01A008290.1	Npp.01A008290.1	Npp.01B009600.1	Npp.01C007170.1	-
Npp.01A008300.1	Npp.01A008300.1	Npp.01B009610.1	Npp.01C007180.1	-
Npp.01A008310.1	Npp.01A008310.1	Npp.01B009630.1	Npp.01C007200.1	-
Npp.01A008320.1	Npp.01A008320.1	Npp.01B009640.1	Npp.01C007210.1	-
Npp.01A008330.1	Npp.01A008330.1	Npp.01B009650.1	Npp.01C007220.1	-
Npp.01A008340.1	Npp.01A008340.1	Npp.01B009660.1	Npp.01C007230.1	-
Npp.01A008350.1	Npp.01A008350.1	Npp.01B009670.1	-	-
Npp.01A008360.1	Npp.01A008360.1	Npp.01B030110.1	Npp.01C006570.1	-
Npp.01A008370.1	Npp.01A008370.1	Npp.01B009680.1	Npp.01C007250.1	Npp.10D017530.1
Npp.01A008380.1	Npp.01A008380.1	-	Npp.01C017810.1	-
Npp.01A008390.1	Npp.01A008390.1	Npp.01B009690.1	Npp.01C007260.1	-
Npp.01A008400.1	Npp.01A008400.1|Npp.07A010630.1	Npp.01B009700.1	Npp.01C007280.1	Npp.01D040900.1
Npp.01A008410.1	Npp.01A008410.1	Npp.01B009710.1	Npp.01C007290.1	Npp.03D016360.1
Npp.01A008420.1	Npp.01A008420.1	Npp.01B009760.1|Npp.01B009730.1	Npp.01C007340.1|Npp.01C007350.1	-
Npp.01A008430.1	Npp.01A008430.1	-	Npp.01C007320.1	-
Npp.01A008440.1	Npp.01A008440.1	Npp.01B009790.1	Npp.01C007370.1	-
Npp.01A008450.1	Npp.01A008450.1|Npp.01A007910.1	Npp.01B009830.1	Npp.01C007390.1	-
Npp.01A008450.2	Npp.01A008450.2	Npp.01B009770.1|Npp.01B009780.1|Npp.01B009810.1|Npp.01B009820.1	Npp.01C007360.1|Npp.01C007380.1	-
Npp.01A008460.1	Npp.01A008460.1	-	Npp.01C007400.1	-
Npp.01A008470.1	Npp.01A008470.1	Npp.01B009840.1	Npp.01C007410.1	-
Npp.01A008480.1	Npp.01A008480.1	Npp.01B009850.1	Npp.01C007420.1	-
Npp.01A008490.1	Npp.01A008490.1	Npp.01B009860.1	Npp.01C007430.1	-
Npp.01A008500.1	Npp.01A008500.1	Npp.01B009880.1|Npp.01B009870.1	Npp.01C007440.1	-
Npp.01A008510.1	Npp.01A008510.1	Npp.01B009890.1	Npp.01C007450.1	-
Npp.01A008520.1	Npp.01A008520.1	Npp.01B009900.1	Npp.01C007460.1	-
Npp.01A008530.1	Npp.01A008530.1	Npp.01B009910.1	Npp.01C007470.1	-
Npp.01A008540.1	Npp.01A008540.1	Npp.01B009920.1	Npp.01C007480.1	-
Npp.01A008550.1	Npp.01A008550.1	Npp.01B009930.1|Npp.01B010580.1	-	-
Npp.01A008560.1	Npp.01A008560.1	Npp.01B009940.1|Npp.01B010570.1	Npp.05C004480.1	-
Npp.01A008570.1	Npp.01A008570.1	Npp.01B009950.1	-	-
Npp.01A008580.1	Npp.01A008580.1	Npp.01B036770.1	Npp.01C009400.1|Npp.01C008810.1|Npp.07C009350.1	Npp.01D003460.1
Npp.01A008590.1	Npp.01A008590.1|Npp.01A026280.1	Npp.01B002650.1|Npp.01B027270.1|Npp.01B051660.1|Npp.01B028810.1	Npp.01C011300.1|Npp.02C006950.1	-
Npp.01A008600.1	Npp.01A008600.1	Npp.01B009960.1|Npp.01B010550.1	-	-
Npp.01A008610.1	Npp.01A008610.1	Npp.01B009970.1|Npp.01B010540.1|Npp.05B019520.1	-	-
Npp.01A008620.1	Npp.01A008620.1|Npp.01A000480.1	Npp.01B010530.1	-	-
Npp.01A008630.1	Npp.01A008630.1	Npp.01B009980.1|Npp.01B010520.1	-	-
Npp.01A008640.1	Npp.01A008640.1	Npp.01B009990.1|Npp.01B010500.1	-	-
Npp.01A008650.1	Npp.01A008650.1	Npp.01B010490.1	-	-
Npp.01A008660.1	Npp.01A008660.1	Npp.01B010010.1|Npp.01B010480.1	-	-
Npp.01A008670.1	Npp.01A008670.1|Npp.01A008690.1	Npp.01B010020.1|Npp.01B010470.1	-	-
Npp.01A008680.1	Npp.01A008680.1|Npp.01A009030.1|Npp.01A009260.1|Npp.01A009270.1	Npp.01B010030.1|Npp.01B010450.1|Npp.01B010670.1|Npp.01B011400.1	Npp.01C007890.1|Npp.01C007490.1	Npp.02D037690.1
Npp.01A008700.1	Npp.01A008700.1	Npp.01B010050.1|Npp.01B010440.1	-	Npp.03D026330.1
Npp.01A008710.1	Npp.01A008710.1	Npp.01B010060.1|Npp.01B010430.1	-	Npp.02D033970.1
Npp.01A008720.1	Npp.01A008720.1	Npp.01B010070.1|Npp.01B010420.1	-	-
Npp.01A008730.1	Npp.01A008730.1	Npp.01B010080.1|Npp.01B010410.1	-	-
Npp.01A008740.1	Npp.01A008740.1	Npp.01B010090.1|Npp.01B010400.1	-	Npp.09D009780.1
Npp.01A008750.1	Npp.01A008750.1	Npp.01B010100.1|Npp.01B010390.1	-	-
Npp.01A008760.1	Npp.01A008760.1	Npp.01B010380.1	-	-
Npp.01A008770.1	Npp.01A008770.1	-	Npp.01C015320.1|Npp.01C015330.1	-
Npp.01A008780.1	Npp.01A008780.1	Npp.01B010120.1|Npp.01B010360.1|Npp.01B010110.1|Npp.01B010370.1	-	-
Npp.01A008790.1	Npp.01A008790.1	Npp.01B010130.1|Npp.01B010350.1	-	-
Npp.01A008800.1	Npp.01A008800.1	Npp.01B010140.1|Npp.01B010340.1	-	-
Npp.01A008810.1	Npp.01A008810.1|Npp.01A000450.1	Npp.01B010150.1|Npp.01B010330.1	-	Npp.10D025220.1
Npp.01A008820.1	Npp.01A008820.1	Npp.01B010160.1|Npp.01B010320.1	-	-
Npp.01A008830.1	Npp.01A008830.1	Npp.01B010170.1|Npp.01B010310.1	-	-
Npp.01A008840.1	Npp.01A008840.1	Npp.01B010180.1|Npp.01B010300.1	Npp.02C017640.1	Npp.01D024830.1
Npp.01A008850.1	Npp.01A008850.1	Npp.01B010290.1|Npp.01B010190.1	-	-
Npp.01A008860.1	Npp.01A008860.1	Npp.01B010280.1|Npp.01B010200.1	-	-
Npp.01A008870.1	Npp.01A008870.1	Npp.01B010210.1|Npp.01B010270.1	-	-
Npp.01A008880.1	Npp.01A008880.1	Npp.01B010260.1	Npp.01C000700.1	-
Npp.01A008890.1	Npp.01A008890.1	Npp.01B010250.1	Npp.01C000710.1	-
Npp.01A008900.1	Npp.01A008900.1	Npp.01B010240.1	Npp.01C000720.1	Npp.01D001770.1
Npp.01A008910.1	Npp.01A008910.1	Npp.01B010230.1	Npp.01C000730.1	Npp.01D021940.1|Npp.09D009790.1
Npp.01A008920.1	Npp.01A008920.1	-	Npp.01C000740.1	Npp.01D001750.1
Npp.01A008930.1	Npp.01A008930.1	-	Npp.01C000750.1	Npp.01D001760.1
Npp.01A008940.1	Npp.01A008940.1	-	Npp.01C000760.1	-
Npp.01A008950.1	Npp.01A008950.1|Npp.01A016980.1	-	-	Npp.01D001790.1
Npp.01A008970.1	Npp.01A008970.1	-	-	Npp.01D001800.1
Npp.01A008980.1	Npp.01A008980.1	-	-	Npp.01D001810.1
Npp.01A008990.1	Npp.01A008990.1|Npp.01A036890.1	Npp.01B020330.1	Npp.01C000770.1	Npp.01D001820.1
Npp.01A009060.1	Npp.01A009060.1|Npp.01A036840.1	Npp.01B010640.1	-	-
Npp.01A009070.1	Npp.01A009070.1|Npp.01A036830.1	Npp.01B010620.1	-	-
Npp.01A009080.1	Npp.01A009080.1	-	-	-
Npp.01A009090.1	Npp.01A009090.1|Npp.01A036820.1	Npp.01B010610.1	-	Npp.01D001740.1
Npp.01A009100.1	Npp.01A009100.1|Npp.01A036810.1	Npp.01B010590.1|Npp.01B010600.1|Npp.04B029030.1	-	Npp.01D001730.1
Npp.01A009110.1	Npp.01A009110.1	Npp.01B011310.1	Npp.01C007810.1	-
Npp.01A009120.1	Npp.01A009120.1	Npp.01B011300.1	Npp.01C007800.1	Npp.03D001760.1
Npp.01A009130.1	Npp.01A009130.1	Npp.01B011290.1	Npp.01C007790.1	-
Npp.01A009140.1	Npp.01A009140.1|Npp.01A036300.1	Npp.01B011270.1	-	-
Npp.01A009150.1	Npp.01A009150.1|Npp.01A036310.1	Npp.01B011260.1	-	-
Npp.01A009160.1	Npp.01A009160.1|Npp.01A036340.1	Npp.01B011240.1	-	-
Npp.01A009170.1	Npp.01A009170.1|Npp.01A036350.1	Npp.01B011230.1	-	-
Npp.01A009180.1	Npp.01A009180.1|Npp.01A036360.1	Npp.01B011220.1	-	-
Npp.01A009190.1	Npp.01A009190.1|Npp.01A036380.1	Npp.01B011200.1	-	-
Npp.01A009200.1	Npp.01A009200.1	Npp.01B011330.1	Npp.01C007830.1	-
Npp.01A009210.1	Npp.01A009210.1	Npp.01B011350.1|Npp.01B011340.1	Npp.01C007840.1	-
Npp.01A009220.1	Npp.01A009220.1|Npp.01A029820.1|Npp.03A034970.1	Npp.01B011360.1|Npp.08B015600.1	Npp.01C007850.1	Npp.05D010060.1
Npp.01A009230.1	Npp.01A009230.1	Npp.01B011370.1	Npp.01C007860.1	-
Npp.01A009240.1	Npp.01A009240.1	Npp.01B011380.1	Npp.01C007870.1	-
Npp.01A009250.1	Npp.01A009250.1	Npp.01B011390.1	Npp.01C007880.1	-
Npp.01A009280.1	Npp.01A009280.1	Npp.01B011410.1|Npp.01B011420.1	Npp.01C007900.1	-
Npp.01A009290.1	Npp.01A009290.1	Npp.01B011430.1	Npp.01C007910.1	-
Npp.01A009300.1	Npp.01A009300.1	Npp.01B011440.1|Npp.07B005420.1	Npp.01C007920.1	-
Npp.01A009310.1	Npp.01A009310.1	Npp.01B011450.1	Npp.01C007930.1	-
Npp.01A009320.1	Npp.01A009320.1	Npp.01B011460.1	Npp.01C007940.1	-
Npp.01A009330.1	Npp.01A009330.1	Npp.01B011470.1	Npp.01C007950.1	-
Npp.01A009340.1	Npp.01A009340.1	Npp.01B011480.1	Npp.01C007960.1	-
Npp.01A009350.1	Npp.01A009350.1	Npp.01B011490.1	Npp.01C007970.1	-
Npp.01A009360.1	Npp.01A009360.1	Npp.01B011510.1	Npp.01C007980.1	-
Npp.01A009370.1	Npp.01A009370.1|Npp.01A041380.1	Npp.09B000710.1	Npp.01C020880.1	Npp.01D014460.1
Npp.01A009380.1	Npp.01A009380.1	Npp.01B011530.1	Npp.01C007990.1	-
Npp.01A009390.1	Npp.01A009390.1|Npp.01A041150.1	Npp.01B011540.1|Npp.01B009430.1	Npp.01C008020.1|Npp.01C008000.1	Npp.09D000920.1
Npp.01A009400.1	Npp.01A009400.1	Npp.01B011550.1	Npp.01C008010.1|Npp.01C008040.1	-
Npp.01A009410.1	Npp.01A009410.1	Npp.01B011560.1	Npp.01C008050.1|Npp.02C011930.1	-
Npp.01A009420.1	Npp.01A009420.1	Npp.01B011570.1	-	-
Npp.01A009430.1	Npp.01A009430.1	Npp.01B011580.1	Npp.01C008060.1	-
Npp.01A009440.1	Npp.01A009440.1	Npp.01B011590.1	Npp.01C008070.1|Npp.10C005480.1	-
Npp.01A009450.1	Npp.01A009450.1	Npp.01B011600.1	Npp.01C008080.1	-
Npp.01A009460.1	Npp.01A009460.1	Npp.01B011610.1	Npp.01C008090.1	-
Npp.01A009470.1	Npp.01A009470.1	Npp.01B050670.1|Npp.06B003820.1	Npp.01C044720.1|Npp.01C042410.1	-
Npp.01A009480.1	Npp.01A009480.1	Npp.01B011620.1	Npp.01C008100.1	-
Npp.01A009490.1	Npp.01A009490.1	Npp.01B011630.1	-	-
Npp.01A009500.1	Npp.01A009500.1	-	Npp.01C005530.1	-
Npp.01A009510.1	Npp.01A009510.1	Npp.01B011640.1|Npp.01B011860.1	-	-
Npp.01A009520.1	Npp.01A009520.1	Npp.01B011660.1|Npp.01B011880.1	-	-
Npp.01A009530.1	Npp.01A009530.1	Npp.01B011670.1|Npp.01B011890.1	-	-
Npp.01A009550.1	Npp.01A009550.1	Npp.01B011680.1	-	-
Npp.01A009560.1	Npp.01A009560.1	Npp.01B011690.1|Npp.01B011900.1	-	-
Npp.01A009570.1	Npp.01A009570.1	Npp.01B011700.1|Npp.01B011910.1	-	-
Npp.01A009580.1	Npp.01A009580.1	Npp.01B012150.1	Npp.01C008550.1|Npp.01C008500.1	-
Npp.01A009590.1	Npp.01A009590.1	Npp.01B012140.1	Npp.01C008540.1	Npp.10D019800.1
Npp.01A009600.1	Npp.01A009600.1	Npp.01B012130.1	-	Npp.10D019790.1
Npp.01A009610.1	Npp.01A009610.1	Npp.01B012120.1	-	-
Npp.01A009620.1	Npp.01A009620.1	Npp.01B012100.1	-	Npp.10D019760.1
Npp.01A009630.1	Npp.01A009630.1	Npp.01B012090.1	-	-
Npp.01A009640.1	Npp.01A009640.1	Npp.01B012080.1	-	-
Npp.01A009650.1	Npp.01A009650.1	Npp.01B012070.1	-	-
Npp.01A009660.1	Npp.01A009660.1|Npp.01A009700.1	-	Npp.01C024030.1	-
Npp.01A009670.1	Npp.01A009670.1	Npp.01B011820.1|Npp.01B012060.1	-	-
Npp.01A009680.1	Npp.01A009680.1	Npp.01B011810.1|Npp.01B012050.1	-	-
Npp.01A009690.1	Npp.01A009690.1	-	Npp.09C023270.1	-
Npp.01A009710.1	Npp.01A009710.1	Npp.01B012190.1	Npp.01C008530.1|Npp.01C008470.1	-
Npp.01A009720.1	Npp.01A009720.1	Npp.01B012200.1	Npp.01C008460.1	-
Npp.01A009730.1	Npp.01A009730.1	Npp.01B012210.1	Npp.01C008450.1	-
Npp.01A009740.1	Npp.01A009740.1	Npp.01B012220.1	Npp.01C008440.1	-
Npp.01A009760.1	Npp.01A009760.1	Npp.01B012240.1	Npp.01C008430.1	-
Npp.01A009770.1	Npp.01A009770.1	Npp.01B012250.1	Npp.01C008420.1	-
Npp.01A009780.1	Npp.01A009780.1	-	Npp.01C008410.1	-
Npp.01A009790.1	Npp.01A009790.1	Npp.01B012270.1	Npp.01C008400.1	-
Npp.01A009800.1	Npp.01A009800.1	Npp.01B012280.1	Npp.01C008380.1|Npp.01C008390.1	-
Npp.01A009810.1	Npp.01A009810.1	Npp.01B012290.1	Npp.01C008370.1	-
Npp.01A009820.1	Npp.01A009820.1	Npp.01B012300.1	-	-
Npp.01A009830.1	Npp.01A009830.1	Npp.01B012310.1	Npp.01C008360.1	-
Npp.01A009840.1	Npp.01A009840.1	Npp.01B012320.1	Npp.01C008350.1	-
Npp.01A009850.1	Npp.01A009850.1	Npp.01B012350.1	Npp.01C008300.1|Npp.01C008320.1	-
Npp.01A009860.1	Npp.01A009860.1	Npp.01B012360.1	Npp.01C008290.1	-
Npp.01A009870.1	Npp.01A009870.1	Npp.01B012370.1	Npp.01C008280.1	-
Npp.01A009880.1	Npp.01A009880.1	Npp.01B012380.1	Npp.01C008270.1	-
Npp.01A009890.1	Npp.01A009890.1	Npp.01B007760.1|Npp.01B008580.1|Npp.01B051860.1	Npp.01C042660.1	-
Npp.01A009900.1	Npp.01A009900.1	Npp.01B012390.1	Npp.01C008260.1|Npp.01C008590.1	-
Npp.01A009910.1	Npp.01A009910.1	Npp.01B012410.1|Npp.10B004920.1	Npp.01C008240.1|Npp.01C008600.1	-
Npp.01A009920.1	Npp.01A009920.1	Npp.01B012420.1	Npp.01C008610.1	-
Npp.01A009930.1	Npp.01A009930.1	-	Npp.01C020510.1	-
Npp.01A009940.1	Npp.01A009940.1	Npp.01B012430.1	Npp.01C008630.1|Npp.01C008620.1	-
Npp.01A009950.1	Npp.01A009950.1	Npp.01B012440.1	Npp.01C008640.1|Npp.01C008650.1	-
Npp.01A009960.1	Npp.01A009960.1	Npp.01B012450.1	Npp.01C008660.1	-
Npp.01A009970.1	Npp.01A009970.1	Npp.01B012470.1	Npp.01C008680.1|Npp.04C013000.1	Npp.01D001240.1
Npp.01A009980.1	Npp.01A009980.1	Npp.01B012480.1	Npp.01C008690.1	Npp.01D001250.1
Npp.01A010000.1	Npp.01A010000.1	Npp.01B012500.1	Npp.01C008710.1	Npp.01D001290.1
Npp.01A010010.1	Npp.01A010010.1	Npp.01B017060.1	Npp.01C047890.1	-
Npp.01A010020.1	Npp.01A010020.1	Npp.01B012520.1|Npp.01B036870.1	Npp.01C008720.1	Npp.01D001300.1
Npp.01A010030.1	Npp.01A010030.1	Npp.01B012530.1|Npp.01B036860.1|Npp.03B032760.1	Npp.01C008740.1	-
Npp.01A010040.1	Npp.01A010040.1	Npp.01B012540.1|Npp.01B036850.1	Npp.01C008750.1	-
Npp.01A010050.1	Npp.01A010050.1	Npp.01B012550.1|Npp.01B036840.1	Npp.01C008760.1	Npp.03D031960.1
Npp.01A010060.1	Npp.01A010060.1	Npp.01B012560.1|Npp.01B036830.1	-	-
Npp.01A010070.1	Npp.01A010070.1	Npp.01B017720.1	-	Npp.01D005730.1
Npp.01A010080.1	Npp.01A010080.1	Npp.01B036800.1	-	-
Npp.01A010090.1	Npp.01A010090.1	Npp.01B036810.1	Npp.01C008790.1|Npp.01C009430.1	-
Npp.01A010100.1	Npp.01A010100.1	-	Npp.01C005460.1	-
Npp.01A010110.1	Npp.01A010110.1	-	Npp.01C008930.1	Npp.01D003280.1
Npp.01A010120.1	Npp.01A010120.1	-	Npp.01C008920.1|Npp.01C009040.1	Npp.01D003270.1
Npp.01A010130.1	Npp.01A010130.1	Npp.01B028180.1|Npp.01B028200.1	Npp.01C008900.1|Npp.01C023240.1|Npp.01C023270.1|Npp.01C023430.1|Npp.01C023440.1|Npp.01C023480.1|Npp.01C023200.1	Npp.01D003250.1
Npp.01A010140.1	Npp.01A010140.1	-	Npp.01C008910.1|Npp.01C009030.1	Npp.01D003260.1
Npp.01A010150.1	Npp.01A010150.1	-	Npp.01C008890.1|Npp.01C009010.1|Npp.01C009020.1	Npp.01D003240.1
Npp.01A010160.1	Npp.01A010160.1|Npp.01A000150.1|Npp.01A027030.1	Npp.08B010270.1	Npp.01C008950.1	Npp.01D003210.1
Npp.01A010170.1	Npp.01A010170.1	-	Npp.01C008970.1|Npp.01C009050.1	Npp.01D003190.1
Npp.01A010180.1	Npp.01A010180.1	-	Npp.01C009080.1|Npp.01C009130.1|Npp.01C009450.1|Npp.01C009440.1	Npp.01D003170.1
Npp.01A010190.1	Npp.01A010190.1	-	-	Npp.01D003160.1
Npp.01A010210.1	Npp.01A010210.1	Npp.01B036510.1	Npp.01C009110.1	Npp.01D003140.1
Npp.01A010220.1	Npp.01A010220.1	Npp.01B018420.1|Npp.01B036580.1	Npp.01C019030.1	-
Npp.01A010230.1	Npp.01A010230.1	Npp.01B036530.1|Npp.10B022340.1	Npp.01C009090.1|Npp.01C009230.1	Npp.01D003120.1|Npp.01D003290.1
Npp.01A010240.1	Npp.01A010240.1|Npp.01A010200.1	Npp.01B036550.1|Npp.01B036500.1	Npp.01C009120.1|Npp.08C012400.1	Npp.01D003150.1
Npp.01A010250.1	Npp.01A010250.1	Npp.01B036570.1	-	Npp.01D003100.1
Npp.01A010260.1	Npp.01A010260.1	Npp.01B036520.1	Npp.01C009100.1|Npp.04C005440.1	Npp.01D003130.1|Npp.01D036080.1
Npp.01A010270.1	Npp.01A010270.1	Npp.01B036590.1	-	Npp.01D003090.1
Npp.01A010280.1	Npp.01A010280.1	Npp.01B036600.1	Npp.01C009140.1	Npp.01D003080.1
Npp.01A010290.1	Npp.01A010290.1	Npp.01B036610.1	Npp.01C009160.1	Npp.01D003070.1
Npp.01A010300.1	Npp.01A010300.1	-	Npp.01C009170.1	Npp.01D003060.1
Npp.01A010310.1	Npp.01A010310.1	Npp.01B036620.1	Npp.01C009180.1	Npp.01D003050.1
Npp.01A010320.1	Npp.01A010320.1	Npp.01B036630.1	Npp.01C009190.1|Npp.02C013070.1|Npp.03C038600.1	Npp.01D003040.1
Npp.01A010330.1	Npp.01A010330.1	Npp.01B036640.1	-	Npp.01D003030.1|Npp.01D002950.1
Npp.01A010340.1	Npp.01A010340.1	-	Npp.01C009200.1	Npp.01D003020.1
Npp.01A010350.1	Npp.01A010350.1	Npp.01B036650.1	Npp.01C009210.1	Npp.01D003010.1
Npp.01A010360.1	Npp.01A010360.1	Npp.01B036440.1|Npp.09B000030.1	Npp.01C038890.1	Npp.01D002990.1
Npp.01A010370.1	Npp.01A010370.1	Npp.01B036450.1	Npp.01C038900.1	-
Npp.01A010380.1	Npp.01A010380.1	Npp.01B036460.1	Npp.01C038920.1	Npp.01D002980.1
Npp.01A010390.1	Npp.01A010390.1	Npp.01B036470.1	Npp.01C038930.1	Npp.01D002970.1
Npp.01A010400.1	Npp.01A010400.1	Npp.01B036490.1	Npp.01C038950.1	Npp.01D002960.1
Npp.01A010410.1	Npp.01A010410.1	-	-	Npp.01D002870.1|Npp.01D001200.1|Npp.01D001190.1
Npp.01A010420.1	Npp.01A010420.1	-	Npp.01C009550.1	Npp.01D002850.1|Npp.01D001170.1|Npp.01D002860.1|Npp.01D001180.1
Npp.01A010430.1	Npp.01A010430.1	-	Npp.01C026020.1|Npp.01C037780.1	Npp.01D025330.1|Npp.01D038200.1
Npp.01A010440.1	Npp.01A010440.1	-	Npp.01C009540.1	Npp.01D002840.1|Npp.01D001160.1
Npp.01A010450.1	Npp.01A010450.1	-	Npp.01C009530.1	Npp.01D002820.1|Npp.01D001150.1
Npp.01A010460.1	Npp.01A010460.1	-	Npp.01C009520.1	Npp.01D002810.1|Npp.01D001130.1|Npp.01D001140.1
Npp.01A010470.1	Npp.01A010470.1	-	Npp.01C009510.1	Npp.01D001120.1
Npp.01A010480.1	Npp.01A010480.1|Npp.01A010500.1	Npp.01B012610.1|Npp.ctg115786	Npp.01C009470.1	Npp.01D001090.1|Npp.01D001070.1
Npp.01A010490.1	Npp.01A010490.1	-	Npp.01C009490.1	Npp.01D002800.1|Npp.01D001110.1
Npp.01A010510.1	Npp.01A010510.1|Npp.ctg038494	Npp.01B012600.1	Npp.01C009460.1|Npp.05C019830.1	Npp.01D001080.1|Npp.ctg115787
Npp.01A010520.1	Npp.01A010520.1	Npp.01B012880.1	Npp.01C009790.1	Npp.01D000830.1
Npp.01A010530.1	Npp.01A010530.1	Npp.01B012900.1	Npp.01C009800.1	Npp.01D000820.1
Npp.01A010540.1	Npp.01A010540.1	Npp.01B012910.1	Npp.01C009810.1	Npp.01D000810.1|Npp.01D000800.1
Npp.01A010550.1	Npp.01A010550.1	-	Npp.09C020650.1	-
Npp.01A010570.1	Npp.01A010570.1|Npp.01A010580.1	Npp.01B012920.1	Npp.01C009820.1|Npp.01C009830.1	Npp.01D000790.1
Npp.01A010590.1	Npp.01A010590.1	Npp.01B012720.1	Npp.01C009670.1	Npp.01D000970.1
Npp.01A010600.1	Npp.01A010600.1	-	Npp.01C009580.1	Npp.01D002900.1|Npp.01D001230.1|Npp.01D002920.1
Npp.01A010610.1	Npp.01A010610.1	-	Npp.01C009590.1	Npp.01D002930.1
Npp.01A010620.1	Npp.01A010620.1	-	Npp.01C038960.1|Npp.01C038980.1	-
Npp.01A010630.1	Npp.01A010630.1	-	Npp.01C009360.1|Npp.08C010560.1	Npp.01D003430.1
Npp.01A010640.1	Npp.01A010640.1|Npp.01A004390.1	Npp.01B036750.1|Npp.02B002760.1	-	Npp.01D003420.1
Npp.01A010650.1	Npp.01A010650.1	Npp.01B036740.1	-	Npp.01D003410.1
Npp.01A010660.1	Npp.01A010660.1	Npp.01B036730.1	Npp.01C009350.1	Npp.01D003400.1
Npp.01A010670.1	Npp.01A010670.1	-	Npp.01C027590.1	-
Npp.01A010680.1	Npp.01A010680.1	Npp.01B036720.1	Npp.01C009340.1	Npp.01D003390.1
Npp.01A010690.1	Npp.01A010690.1	Npp.01B036710.1	Npp.01C009330.1	Npp.01D003380.1
Npp.01A010700.1	Npp.01A010700.1	Npp.01B036700.1	Npp.01C009320.1	Npp.01D003370.1|Npp.05D015970.1
Npp.01A010710.1	Npp.01A010710.1	Npp.01B042370.1	Npp.01C036470.1	Npp.01D028850.1
Npp.01A010720.1	Npp.01A010720.1	Npp.01B042380.1	Npp.01C036480.1	Npp.01D029480.2|Npp.01D029480.1
Npp.01A010750.1	Npp.01A010750.1	Npp.01B042940.1|Npp.01B042850.1	-	Npp.01D029800.1
Npp.01A010760.1	Npp.01A010760.1	Npp.01B042860.1|Npp.01B042950.1	-	Npp.01D029810.1
Npp.01A010770.1	Npp.01A010770.1	Npp.01B042870.1	-	Npp.01D029820.1
Npp.01A010780.1	Npp.01A010780.1	Npp.01B042970.1|Npp.01B042880.1	-	Npp.01D029830.1
Npp.01A010790.1	Npp.01A010790.1	Npp.01B042990.1	Npp.01C036920.1	Npp.01D029840.1
Npp.01A010800.1	Npp.01A010800.1	Npp.01B043000.1	Npp.01C036910.1	Npp.01D029850.1
Npp.01A010810.1	Npp.01A010810.1	Npp.01B043020.1|Npp.06B007780.1|Npp.07B008120.1	Npp.01C036860.1	Npp.01D029870.1|Npp.01D016760.1
Npp.01A010820.1	Npp.01A010820.1	Npp.01B043030.1	Npp.01C036870.1	Npp.01D029880.1
Npp.01A010830.1	Npp.01A010830.1	Npp.01B043040.1	Npp.01C036880.1	Npp.01D029890.1
Npp.01A010840.1	Npp.01A010840.1|Npp.01A010850.1	-	Npp.01C036890.1|Npp.01C036940.1	Npp.01D029910.1
Npp.01A010860.1	Npp.01A010860.1	Npp.01B043050.1	Npp.01C036930.1	Npp.01D029920.1
Npp.01A010870.1	Npp.01A010870.1	Npp.01B042710.1	Npp.01C036770.1	Npp.01D029740.1
Npp.01A010880.1	Npp.01A010880.1	Npp.01B042720.1	-	-
Npp.01A010890.1	Npp.01A010890.1	Npp.01B042730.1	Npp.01C036780.1	Npp.01D029750.1
Npp.01A010900.1	Npp.01A010900.1	Npp.01B042790.1|Npp.01B042740.1	Npp.01C036790.1	-
Npp.01A010910.1	Npp.01A010910.1	Npp.01B042780.1|Npp.01B042750.1	Npp.01C036800.1	-
Npp.01A010920.1	Npp.01A010920.1	Npp.01B042690.1|Npp.01B042670.1	Npp.01C036740.1	Npp.01D029720.1
Npp.01A010930.1	Npp.01A010930.1	Npp.01B042660.1|Npp.01B042680.1	Npp.01C036730.1	Npp.01D029710.1
Npp.01A010940.1	Npp.01A010940.1	Npp.01B042620.1	Npp.01C036660.1	Npp.01D029660.1
Npp.01A010950.1	Npp.01A010950.1	Npp.01B042610.1	Npp.01C036650.1	Npp.01D029650.1
Npp.01A010960.1	Npp.01A010960.1	Npp.01B042600.1	-	Npp.01D029640.1
Npp.01A010970.1	Npp.01A010970.1	Npp.01B042590.1	Npp.01C036640.1	-
Npp.01A010980.1	Npp.01A010980.1	Npp.01B042580.1	Npp.01C036630.1	Npp.01D029630.1
Npp.01A010990.1	Npp.01A010990.1	Npp.01B042570.1	Npp.01C036620.1	Npp.01D029620.1
Npp.01A011000.1	Npp.01A011000.1|Npp.02A018430.1	Npp.01B042560.1|Npp.05B018720.1	Npp.01C036610.1	Npp.01D029610.1
Npp.01A011010.1	Npp.01A011010.1|Npp.01A011050.1	Npp.01B042490.1|Npp.01B042500.1	Npp.01C011660.1|Npp.01C011690.1|Npp.01C011700.1|Npp.01C011710.1|Npp.01C036570.1|Npp.01C036600.1	Npp.01D029570.1|Npp.01D029600.1
Npp.01A011020.1	Npp.01A011020.1	Npp.01B042540.1	-	Npp.01D029590.1
Npp.01A011040.1	Npp.01A011040.1	Npp.01B042510.1|Npp.01B042530.1|Npp.01B042520.1	Npp.01C036580.1|Npp.01C036590.1	Npp.01D029580.1|Npp.05D000150.1
Npp.01A011060.1	Npp.01A011060.1|Npp.02A012190.1	Npp.01B042550.1	Npp.01C036560.1	Npp.01D029560.1
Npp.01A011070.1	Npp.01A011070.1	Npp.01B042480.1	Npp.01C036550.1	Npp.01D029550.1|Npp.01D011160.1|Npp.01D011170.1
Npp.01A011080.1	Npp.01A011080.1	Npp.01B042470.1	Npp.01C036540.1	Npp.01D029540.1
Npp.01A011090.1	Npp.01A011090.1	Npp.01B042460.1	Npp.01C036530.1	Npp.01D029530.1
Npp.01A011100.1	Npp.01A011100.1	Npp.01B042440.1	Npp.01C036520.1	Npp.01D029520.1
Npp.01A011110.1	Npp.01A011110.1	Npp.01B042430.1	Npp.01C036510.1	Npp.01D029510.1|Npp.09D020940.1
Npp.01A011120.1	Npp.01A011120.1	Npp.01B042280.1	Npp.01C036340.1	Npp.01D028930.1
Npp.01A011130.1	Npp.01A011130.1|Npp.01A011740.1	Npp.01B015260.1	Npp.01C012450.1	-
Npp.01A011140.1	Npp.01A011140.1|Npp.01A011730.1|Npp.01A011720.1	Npp.01B015240.1	Npp.01C012430.1	-
Npp.01A011150.1	Npp.01A011150.1|Npp.01A011710.1	Npp.01B015230.1|Npp.01B015740.1	Npp.01C012410.1	-
Npp.01A011160.1	Npp.01A011160.1|Npp.01A011700.1	Npp.01B015220.1	-	-
Npp.01A011170.1	Npp.01A011170.1|Npp.01A011630.1	Npp.01B015180.1	Npp.01C012400.1	-
Npp.01A011180.1	Npp.01A011180.1|Npp.01A011600.1	Npp.01B015170.1	Npp.01C012380.1	-
Npp.01A011190.1	Npp.01A011190.1|Npp.01A011590.1	Npp.01B015160.1	Npp.01C012370.1	-
Npp.01A011200.1	Npp.01A011200.1|Npp.01A011570.1	Npp.01B015140.1	Npp.01C012350.1|Npp.05C023450.1	-
Npp.01A011210.1	Npp.01A011210.1|Npp.01A011580.1	Npp.01B015150.1	Npp.01C012360.1	-
Npp.01A011220.1	Npp.01A011220.1|Npp.01A011530.1|Npp.01A011560.1|Npp.01A011550.1	Npp.01B015130.1|Npp.01B015120.1	Npp.01C012340.1|Npp.10C007910.1	-
Npp.01A011230.1	Npp.01A011230.1|Npp.01A011520.1|Npp.01A011450.1	Npp.01B015090.1	-	-
Npp.01A011240.1	Npp.01A011240.1|Npp.01A011510.1	Npp.01B015080.1	-	-
Npp.01A011250.1	Npp.01A011250.1|Npp.01A011420.1|Npp.01A011500.1	Npp.01B015070.1	-	-
Npp.01A011260.1	Npp.01A011260.1|Npp.01A011410.1	Npp.01B015060.1	-	-
Npp.01A011270.1	Npp.01A011270.1|Npp.01A011470.1	Npp.01B015050.1|Npp.08B005730.1	-	-
Npp.01A011280.1	Npp.01A011280.1|Npp.10A012090.1	Npp.01B014990.1	-	Npp.01D003000.1
Npp.01A011290.1	Npp.01A011290.1	Npp.01B014980.1|Npp.05B020510.1	-	-
Npp.01A011300.1	Npp.01A011300.1	Npp.01B014970.1	Npp.01C012310.1|Npp.02C005310.1	-
Npp.01A011310.1	Npp.01A011310.1	Npp.01B014960.1	Npp.01C012320.1	-
Npp.01A011320.1	Npp.01A011320.1	Npp.01B014950.1	-	-
Npp.01A011330.1	Npp.01A011330.1	Npp.01B014940.1|Npp.07B010020.1	-	Npp.01D032610.1
Npp.01A011340.1	Npp.01A011340.1	Npp.01B014930.1	-	Npp.01D032640.1|Npp.01D032630.1|Npp.01D003630.1
Npp.01A011350.1	Npp.01A011350.1	Npp.01B014920.1|Npp.01B015040.1	-	-
Npp.01A011360.1	Npp.01A011360.1	Npp.01B014910.1|Npp.01B015030.1	-	-
Npp.01A011370.1	Npp.01A011370.1	Npp.01B014880.1|Npp.01B015000.1|Npp.01B014890.1|Npp.01B015010.1	-	-
Npp.01A011380.1	Npp.01A011380.1	Npp.01B014870.1|Npp.01B014610.1	-	-
Npp.01A011390.1	Npp.01A011390.1	Npp.01B014630.1	-	Npp.01D013720.1
Npp.01A011400.1	Npp.01A011400.1	Npp.01B014850.1	Npp.01C012150.1	-
Npp.01A011430.1	Npp.01A011430.1|Npp.01A011540.1|Npp.01A007250.1	Npp.01B015110.1	Npp.01C012330.1	-
Npp.01A011440.1	Npp.01A011440.1|Npp.01A037480.1	Npp.01B015100.1	-	-
Npp.01A011460.1	Npp.01A011460.1|Npp.01A011750.1	Npp.01B015270.1	Npp.01C012460.1	-
Npp.01A011480.1	Npp.01A011480.1	Npp.01B029190.1	Npp.01C036330.1	-
Npp.01A011490.1	Npp.01A011490.1|Npp.01A043380.1	Npp.01B034220.1	Npp.01C047880.1	-
Npp.01A011610.1	Npp.01A011610.1	-	Npp.01C012390.1	-
Npp.01A011640.1	Npp.01A011640.1	Npp.01B015210.1	-	-
Npp.01A011650.1	Npp.01A011650.1	Npp.01B015190.1|Npp.01B026410.1	-	Npp.01D016510.1
Npp.01A011670.1	Npp.01A011670.1|Npp.01A022140.1	Npp.01B015200.1	-	-
Npp.01A011680.1	Npp.01A011680.1	Npp.01B015770.1|Npp.01B015780.1	-	-
Npp.01A011690.1	Npp.01A011690.1	Npp.01B023810.1|Npp.01B040120.1	-	Npp.01D012670.1
Npp.01A011760.1	Npp.01A011760.1	Npp.01B015280.1	Npp.01C012470.1|Npp.06C017460.1	-
Npp.01A011770.1	Npp.01A011770.1|Npp.05A008600.1	Npp.01B015290.1|Npp.01B015350.1	-	-
Npp.01A011780.1	Npp.01A011780.1	-	Npp.01C005040.1	Npp.01D018990.1
Npp.01A011790.1	Npp.01A011790.1	Npp.01B015360.1	Npp.01C012510.1	Npp.01D003810.1
Npp.01A011800.1	Npp.01A011800.1|Npp.09A004700.1	Npp.01B015370.1	Npp.01C012520.1	-
Npp.01A011810.1	Npp.01A011810.1	Npp.01B015310.1	-	-
Npp.01A011820.1	Npp.01A011820.1	Npp.01B006810.1|Npp.01B051650.1	-	Npp.05D007560.1
Npp.01A011830.1	Npp.01A011830.1	Npp.01B015320.1	-	-
Npp.01A011840.1	Npp.01A011840.1	-	Npp.01C023360.1	-
Npp.01A011850.1	Npp.01A011850.1	Npp.01B015330.1|Npp.01B015400.1	-	-
Npp.01A011860.1	Npp.01A011860.1	-	-	-
Npp.01A011870.1	Npp.01A011870.1	Npp.01B015410.1	Npp.01C012550.1|Npp.01C012530.1|Npp.03C038620.1	-
Npp.01A011880.1	Npp.01A011880.1	Npp.01B015420.1	Npp.01C012570.1|Npp.01C012560.1|Npp.01C012540.1	Npp.05D000330.1
Npp.01A011890.1	Npp.01A011890.1	-	Npp.01C012580.1|Npp.04C012990.1	-
Npp.01A011900.1	Npp.01A011900.1|Npp.01A012180.1	-	Npp.01C012590.1	-
Npp.01A011910.1	Npp.01A011910.1|Npp.01A012160.1	-	Npp.01C012610.1	-
Npp.01A011920.1	Npp.01A011920.1|Npp.01A012050.1	-	-	Npp.01D013420.1
Npp.01A011930.1	Npp.01A011930.1	-	Npp.03C017300.1	-
Npp.01A011950.1	Npp.01A011950.1	-	-	Npp.01D002570.1
Npp.01A011960.1	Npp.01A011960.1|Npp.01A012080.1	-	Npp.01C012640.1	Npp.01D013430.1
Npp.01A011970.1	Npp.01A011970.1|Npp.01A012090.1	-	Npp.01C012650.1	Npp.01D013440.1
Npp.01A011980.1	Npp.01A011980.1|Npp.01A012110.1	-	Npp.01C012660.1	Npp.01D013450.1
Npp.01A011990.1	Npp.01A011990.1|Npp.01A007280.1	-	-	-
Npp.01A012000.1	Npp.01A012000.1|Npp.01A012120.1	-	Npp.01C012670.1	Npp.01D013460.1
Npp.01A012010.1	Npp.01A012010.1	-	Npp.01C012690.1	Npp.01D017330.1
Npp.01A012020.1	Npp.01A012020.1	Npp.01B038140.1	-	-
Npp.01A012030.1	Npp.01A012030.1	-	-	Npp.01D010670.1
Npp.01A012040.1	Npp.01A012040.1	-	Npp.01C012620.1|Npp.01C021630.1	-
Npp.01A012060.1	Npp.01A012060.1	Npp.06B003910.1	-	Npp.02D000310.1
Npp.01A012070.1	Npp.01A012070.1	-	Npp.01C003750.1	-
Npp.01A012130.1	Npp.01A012130.1	-	Npp.01C012680.1	Npp.01D013470.1
Npp.01A012140.1	Npp.01A012140.1	Npp.01B015430.1	Npp.01C012700.1	Npp.01D013480.1
Npp.01A012170.1	Npp.01A012170.1	-	Npp.01C012600.1	-
Npp.01A012190.1	Npp.01A012190.1|Npp.01A012150.1	-	Npp.01C012720.1	-
Npp.01A012200.1	Npp.01A012200.1	-	Npp.01C012740.1	-
Npp.01A012210.1	Npp.01A012210.1	Npp.01B015450.1	Npp.01C012730.1|Npp.01C012750.1	Npp.01D013490.1
Npp.01A012220.1	Npp.01A012220.1|Npp.01A014540.1|Npp.01A013240.1	Npp.01B015630.1|Npp.01B015650.1|Npp.01B017010.1	Npp.01C012940.1|Npp.01C012950.1	Npp.01D013680.1|Npp.01D005330.1|Npp.01D013740.1
Npp.01A012230.1	Npp.01A012230.1|Npp.05A011560.1	Npp.01B015620.1	Npp.01C012930.1|Npp.01C041040.1	Npp.01D013670.1
Npp.01A012240.1	Npp.01A012240.1	Npp.01B015610.1	Npp.01C012910.1	Npp.01D013660.1
Npp.01A012250.1	Npp.01A012250.1|Npp.01A012270.1	Npp.01B015600.1	Npp.01C012880.1|Npp.01C012890.1|Npp.01C012900.1	-
Npp.01A012280.1	Npp.01A012280.1|Npp.01A012540.1|Npp.01A014400.1	Npp.01B015590.1|Npp.01B015920.1	Npp.01C012870.1|Npp.01C013130.1	Npp.01D013600.1
Npp.01A012290.1	Npp.01A012290.1	Npp.01B015570.1	Npp.01C012860.1	Npp.01D013630.1
Npp.01A012300.1	Npp.01A012300.1	Npp.01B015560.1|Npp.04B023050.1	Npp.01C012850.1	Npp.01D013620.1
Npp.01A012310.1	Npp.01A012310.1	Npp.01B015550.1	Npp.01C012840.1	Npp.01D013610.1
Npp.01A012320.1	Npp.01A012320.1|Npp.01A012330.1	Npp.01B015530.1|Npp.01B008280.1	Npp.01C012820.1	Npp.01D013570.1
Npp.01A012340.1	Npp.01A012340.1	Npp.01B015520.1	Npp.01C012800.1	-
Npp.01A012350.1	Npp.01A012350.1	Npp.01B015510.1	Npp.01C012790.1	Npp.01D013550.1
Npp.01A012360.1	Npp.01A012360.1	-	-	Npp.01D013540.1|Npp.03D029470.1
Npp.01A012370.1	Npp.01A012370.1	-	-	-
Npp.01A012380.1	Npp.01A012380.1	Npp.01B015500.1	Npp.01C012780.1	Npp.01D013530.1
Npp.01A012390.1	Npp.01A012390.1	-	Npp.01C012760.1	-
Npp.01A012400.1	Npp.01A012400.1	Npp.01B015460.1	Npp.01C012770.1	Npp.01D013500.1
Npp.01A012410.1	Npp.01A012410.1|Npp.01A014530.1	Npp.01B015810.1	Npp.01C013060.1	-
Npp.01A012420.1	Npp.01A012420.1|Npp.01A014520.1|Npp.03A003000.1	Npp.01B015820.1	Npp.06C012170.1	-
Npp.01A012430.1	Npp.01A012430.1|Npp.01A014510.1	Npp.01B015830.1	-	-
Npp.01A012440.1	Npp.01A012440.1|Npp.01A014500.1	-	-	-
Npp.01A012450.1	Npp.01A012450.1|Npp.01A014490.1	Npp.01B015840.1	-	-
Npp.01A012460.1	Npp.01A012460.1|Npp.01A014470.1	Npp.01B015860.1	-	-
Npp.01A012470.1	Npp.01A012470.1|Npp.01A014460.1	Npp.01B015880.1|Npp.01B015870.1	-	-
Npp.01A012480.1	Npp.01A012480.1|Npp.01A014450.1	Npp.01B015900.1	-	-
Npp.01A012490.1	Npp.01A012490.1|Npp.01A014440.1|Npp.02A004470.1	Npp.01B015910.1	-	-
Npp.01A012510.1	Npp.01A012510.1|Npp.01A014420.1	Npp.01B015930.1	-	-
Npp.01A012520.1	Npp.01A012520.1	Npp.01B015940.1	-	-
Npp.01A012530.1	Npp.01A012530.1|Npp.01A014410.1|Npp.08A007880.1	Npp.01B015960.1	Npp.01C013120.1	-
Npp.01A012550.1	Npp.01A012550.1|Npp.01A014390.1	Npp.01B015980.1	Npp.01C013140.1	-
Npp.01A012560.1	Npp.01A012560.1|Npp.01A014340.1	Npp.01B016030.1	Npp.01C013190.1	-
Npp.01A012570.1	Npp.01A012570.1|Npp.01A014330.1	Npp.01B016050.1|Npp.01B016040.1	Npp.01C013200.1	-
Npp.01A012580.1	Npp.01A012580.1|Npp.01A014320.1	Npp.01B016060.1	Npp.01C013210.1	-
Npp.01A012590.1	Npp.01A012590.1|Npp.01A014290.1	Npp.01B016070.1	Npp.01C013220.1	-
Npp.01A012600.1	Npp.01A012600.1|Npp.01A014280.1	Npp.01B016080.1	Npp.01C013230.1	-
Npp.01A012610.1	Npp.01A012610.1	Npp.01B016090.1	-	-
Npp.01A012620.1	Npp.01A012620.1|Npp.01A014160.1	Npp.01B016200.1|Npp.01B016210.1	Npp.01C013290.1	-
Npp.01A012630.1	Npp.01A012630.1|Npp.01A014170.1	Npp.01B016190.1	Npp.03C037970.1	-
Npp.01A012640.1	Npp.01A012640.1|Npp.01A014140.1	Npp.01B016230.1	Npp.01C013310.1	-
Npp.01A012650.1	Npp.01A012650.1|Npp.01A014120.1	Npp.01B016240.1	Npp.01C013320.1|Npp.03C038100.1	-
Npp.01A012660.1	Npp.01A012660.1|Npp.01A014110.1	-	Npp.01C013330.1	-
Npp.01A012670.1	Npp.01A012670.1|Npp.01A014080.1	Npp.01B016250.1	Npp.01C013340.1	-
Npp.01A012680.1	Npp.01A012680.1|Npp.01A014070.1	Npp.01B016260.1|Npp.01B023590.1	Npp.01C013350.1|Npp.03C038110.1	-
Npp.01A012690.1	Npp.01A012690.1|Npp.01A014060.1|Npp.01A010560.1	Npp.01B016270.1	Npp.01C013360.1|Npp.09C020660.1	-
Npp.01A012700.1	Npp.01A012700.1|Npp.01A014050.1	Npp.01B016280.1	Npp.01C013370.1	-
Npp.01A012710.1	Npp.01A012710.1|Npp.01A014040.1	Npp.01B016290.1	Npp.01C013380.1	-
Npp.01A012720.1	Npp.01A012720.1|Npp.01A014030.1	Npp.01B016300.1	Npp.01C013390.1	-
Npp.01A012730.1	Npp.01A012730.1	Npp.01B004960.1	-	-
Npp.01A012740.1	Npp.01A012740.1|Npp.01A014020.1	Npp.01B016310.1	Npp.01C013400.1	-
Npp.01A012750.1	Npp.01A012750.1|Npp.01A021240.1	-	-	-
Npp.01A012760.1	Npp.01A012760.1|Npp.01A014010.1	Npp.01B016320.1	Npp.01C013410.1	-
Npp.01A012770.1	Npp.01A012770.1|Npp.01A014000.1	Npp.01B016330.1	Npp.01C013420.1	-
Npp.01A012780.1	Npp.01A012780.1|Npp.01A013990.1	Npp.01B016340.1|Npp.01B016350.1	-	-
Npp.01A012790.1	Npp.01A012790.1|Npp.01A013950.1	-	-	-
Npp.01A012810.1	Npp.01A012810.1	Npp.06B022010.1|Npp.07B002350.1	-	-
Npp.01A012820.1	Npp.01A012820.1	Npp.01B016370.1	-	-
Npp.01A012830.1	Npp.01A012830.1|Npp.01A013870.1	Npp.01B016380.1	-	-
Npp.01A012840.1	Npp.01A012840.1|Npp.01A013840.1	Npp.01B016400.1	-	-
Npp.01A012850.1	Npp.01A012850.1	Npp.01B016410.1|Npp.01B016420.1	-	Npp.01D030140.1|Npp.05D022700.1
Npp.01A012860.1	Npp.01A012860.1	Npp.01B016430.1|Npp.02B037460.1	-	-
Npp.01A012870.1	Npp.01A012870.1|Npp.01A013920.1	Npp.01B016480.1	Npp.01C013550.1	-
Npp.01A012880.1	Npp.01A012880.1|Npp.01A013830.1	Npp.01B016490.1	Npp.01C013540.1	-
Npp.01A012890.1	Npp.01A012890.1|Npp.01A013820.1	Npp.01B016500.1	Npp.01C013530.1	-
Npp.01A012900.1	Npp.01A012900.1|Npp.01A013810.1	Npp.01B016510.1	Npp.01C013520.1	-
Npp.01A012910.1	Npp.01A012910.1|Npp.01A013780.1	Npp.01B016540.1	Npp.01C013480.1|Npp.10C006380.1	-
Npp.01A012920.1	Npp.01A012920.1|Npp.01A013770.1	Npp.01B016550.1	Npp.01C013470.1	-
Npp.01A012930.1	Npp.01A012930.1|Npp.01A013760.1	Npp.01B016560.1	Npp.01C013460.1	-
Npp.01A012940.1	Npp.01A012940.1|Npp.01A013750.1|Npp.01A041350.1	Npp.01B016570.1	Npp.01C013440.1	-
Npp.01A012950.1	Npp.01A012950.1|Npp.01A013740.1	Npp.01B016580.1	Npp.01C013430.1|Npp.01C011740.1	-
Npp.01A012960.1	Npp.01A012960.1|Npp.01A013730.1	Npp.01B016590.1|Npp.01B016600.1	-	-
Npp.01A012970.1	Npp.01A012970.1|Npp.01A013720.1	Npp.01B016610.1	-	-
Npp.01A012980.1	Npp.01A012980.1|Npp.01A013710.1	Npp.01B046070.1	-	-
Npp.01A012990.1	Npp.01A012990.1|Npp.01A013700.1	Npp.01B016630.1	-	Npp.01D004970.1
Npp.01A013000.1	Npp.01A013000.1|Npp.01A013690.1	Npp.01B016640.1	-	Npp.01D004980.1
Npp.01A013010.1	Npp.01A013010.1|Npp.01A013680.1	Npp.01B016650.1	-	Npp.01D004990.1
Npp.01A013020.1	Npp.01A013020.1|Npp.01A013670.1	Npp.01B016660.1	-	Npp.01D005000.1
Npp.01A013030.1	Npp.01A013030.1|Npp.01A013660.1	Npp.01B016670.1	-	Npp.01D005010.1|Npp.01D002670.1
Npp.01A013040.1	Npp.01A013040.1	Npp.01B016690.1|Npp.01B016700.1	-	-
Npp.01A013050.1	Npp.01A013050.1|Npp.01A013630.1	Npp.01B016720.1	-	-
Npp.01A013060.1	Npp.01A013060.1|Npp.01A013620.1	Npp.01B016730.1	-	-
Npp.01A013070.1	Npp.01A013070.1|Npp.01A013600.1	Npp.01B016750.1	-	-
Npp.01A013080.1	Npp.01A013080.1|Npp.01A013590.1	Npp.01B016760.1	-	Npp.01D005040.1
Npp.01A013090.1	Npp.01A013090.1|Npp.01A013580.1	Npp.01B016770.1	-	Npp.01D005050.1
Npp.01A013100.1	Npp.01A013100.1|Npp.01A013570.1	Npp.01B016780.1	-	Npp.01D005060.1
Npp.01A013110.1	Npp.01A013110.1|Npp.01A013560.1	Npp.01B016790.1	-	Npp.01D005070.1
Npp.01A013120.1	Npp.01A013120.1|Npp.01A013550.1	Npp.01B016800.1	-	Npp.01D005080.1
Npp.01A013130.1	Npp.01A013130.1|Npp.01A013540.1	Npp.01B016810.1	-	Npp.01D005100.1
Npp.01A013140.1	Npp.01A013140.1|Npp.01A013530.1	Npp.01B016820.1	-	Npp.01D005110.1
Npp.01A013160.1	Npp.01A013160.1|Npp.01A013500.1	Npp.01B016850.1	-	Npp.01D005140.1|Npp.05D017900.1
Npp.01A013170.1	Npp.01A013170.1|Npp.01A013490.1	Npp.01B016860.1	-	Npp.01D005180.1
Npp.01A013180.1	Npp.01A013180.1|Npp.01A013480.1	Npp.01B016870.1	-	Npp.01D005190.1
Npp.01A013190.1	Npp.01A013190.1|Npp.01A013470.1	Npp.01B016880.1	Npp.09C000180.1	Npp.01D005200.1|Npp.01D010550.1
Npp.01A013210.1	Npp.01A013210.1	-	Npp.10C023210.1	-
Npp.01A013220.1	Npp.01A013220.1|Npp.01A014570.1	Npp.01B017030.1	-	-
Npp.01A013230.1	Npp.01A013230.1|Npp.01A014550.1	Npp.01B017020.1	-	Npp.01D005340.1
Npp.01A013250.1	Npp.01A013250.1	Npp.01B028450.1	-	-
Npp.01A013260.1	Npp.01A013260.1	Npp.01B017000.1	Npp.01C014120.1	Npp.01D005320.1
Npp.01A013270.1	Npp.01A013270.1	-	Npp.01C014110.1	-
Npp.01A013280.1	Npp.01A013280.1	Npp.01B016990.1	Npp.01C014100.1	Npp.01D005310.1
Npp.01A013290.1	Npp.01A013290.1	Npp.01B016980.1	Npp.01C014090.1	-
Npp.01A013300.1	Npp.01A013300.1	Npp.01B016970.1	Npp.01C014080.1	Npp.01D005300.1
Npp.01A013310.1	Npp.01A013310.1	Npp.01B016960.1	Npp.01C014070.1	Npp.01D005290.1
Npp.01A013320.1	Npp.01A013320.1	Npp.01B016950.1	Npp.01C014060.1	Npp.01D005280.1
Npp.01A013330.1	Npp.01A013330.1	-	Npp.01C014050.1	-
Npp.01A013340.1	Npp.01A013340.1	Npp.01B016940.1	Npp.01C014040.1	Npp.01D005270.1
Npp.01A013350.1	Npp.01A013350.1|Npp.01A013410.1	Npp.01B016930.1	-	Npp.01D005260.1|Npp.01D021510.1
Npp.01A013360.1	Npp.01A013360.1	-	-	-
Npp.01A013370.1	Npp.01A013370.1|Npp.01A013420.1	Npp.01B016920.1	-	Npp.01D005250.1
Npp.01A013380.1	Npp.01A013380.1|Npp.01A013430.1	Npp.01B016910.1|Npp.01B005830.1	-	Npp.01D005240.1
Npp.01A013390.1	Npp.01A013390.1|Npp.01A013440.1	Npp.01B016900.1	-	Npp.01D005230.1
Npp.01A013450.1	Npp.01A013450.1|Npp.01A013400.1	Npp.01B016890.1	-	Npp.01D005220.1
Npp.01A013460.1	Npp.01A013460.1	-	-	Npp.01D005210.1
Npp.01A013510.1	Npp.01A013510.1	Npp.01B016840.1	-	Npp.01D005130.1|Npp.01D005160.1
Npp.01A013520.1	Npp.01A013520.1	Npp.01B016830.1	Npp.01C038100.1	Npp.01D005150.1
Npp.01A013610.1	Npp.01A013610.1	Npp.01B016740.1	-	-
Npp.01A013640.1	Npp.01A013640.1	Npp.01B016710.1|Npp.01B024370.1|Npp.08B016750.1	-	Npp.01D005030.1|Npp.09D009690.1
Npp.01A013650.1	Npp.01A013650.1	Npp.01B016680.1|Npp.07B003330.1	-	Npp.01D005020.1
Npp.01A013790.1	Npp.01A013790.1	Npp.01B016520.1	Npp.01C013500.1|Npp.04C014170.1	-
Npp.01A013800.1	Npp.01A013800.1	-	Npp.01C013510.1	-
Npp.01A013850.1	Npp.01A013850.1	Npp.01B025120.1	-	-
Npp.01A013860.1	Npp.01A013860.1	Npp.01B016390.1	-	-
Npp.01A013890.1	Npp.01A013890.1	Npp.01B018350.1	-	-
Npp.01A013900.1	Npp.01A013900.1	Npp.01B019410.1	Npp.01C023920.1|Npp.01C017460.1	-
Npp.01A013910.1	Npp.01A013910.1	Npp.01B047560.1	Npp.01C024820.1	Npp.01D002640.1
Npp.01A013930.1	Npp.01A013930.1	-	Npp.01C013560.1	-
Npp.01A013940.1	Npp.01A013940.1	Npp.01B018360.1	-	-
Npp.01A013960.1	Npp.01A013960.1	-	-	Npp.01D010580.1
Npp.01A013970.1	Npp.01A013970.1	-	-	-
Npp.01A013980.1	Npp.01A013980.1	Npp.01B016360.1	-	-
Npp.01A014090.1	Npp.01A014090.1	Npp.01B023060.1	Npp.01C018680.1	-
Npp.01A014100.1	Npp.01A014100.1	-	Npp.01C026890.1	Npp.01D037870.1
Npp.01A014130.1	Npp.01A014130.1|Npp.08A013250.1	Npp.01B015890.1|Npp.02B032380.1	-	-
Npp.01A014150.1	Npp.01A014150.1	Npp.01B016220.1	Npp.01C013300.1	-
Npp.01A014180.1	Npp.01A014180.1	Npp.01B016170.1|Npp.01B016180.1	-	-
Npp.01A014190.1	Npp.01A014190.1	Npp.01B016160.1	-	-
Npp.01A014200.1	Npp.01A014200.1|Npp.01A014220.1|Npp.08A014910.1	Npp.01B016150.1	Npp.01C013280.1	-
Npp.01A014210.1	Npp.01A014210.1	Npp.01B017640.1	-	-
Npp.01A014230.1	Npp.01A014230.1	Npp.01B016140.1	Npp.01C013270.1	Npp.06D006310.1
Npp.01A014240.1	Npp.01A014240.1	Npp.01B016130.1	Npp.01C013260.1	-
Npp.01A014250.1	Npp.01A014250.1	Npp.01B016120.1	-	Npp.07D012310.1
Npp.01A014260.1	Npp.01A014260.1	Npp.01B016110.1	Npp.01C013250.1	-
Npp.01A014270.1	Npp.01A014270.1	Npp.01B016100.1	Npp.01C013240.1	-
Npp.01A014300.1	Npp.01A014300.1	-	-	Npp.01D027490.1
Npp.01A014350.1	Npp.01A014350.1	Npp.01B016020.1	Npp.01C013180.1	-
Npp.01A014360.1	Npp.01A014360.1	Npp.01B016010.1	Npp.01C013100.1|Npp.01C013170.1	-
Npp.01A014370.1	Npp.01A014370.1	Npp.01B016000.1	Npp.01C013090.1|Npp.01C013160.1	-
Npp.01A014380.1	Npp.01A014380.1	Npp.01B015990.1	Npp.01C013150.1|Npp.01C013080.1	Npp.01D011710.1
Npp.01A014480.1	Npp.01A014480.1	Npp.01B015850.1	-	-
Npp.01A014560.1	Npp.01A014560.1	-	-	-
Npp.01A014580.1	Npp.01A014580.1|Npp.01A013200.1	-	-	-
Npp.01A014600.1	Npp.01A014600.1	Npp.01B017120.1	-	-
Npp.01A014610.1	Npp.01A014610.1	Npp.01B017110.1	-	-
Npp.01A014620.1	Npp.01A014620.1	Npp.01B008070.1|Npp.01B008090.1|Npp.01B008120.1|Npp.01B008290.1	-	-
Npp.01A014630.1	Npp.01A014630.1	-	-	-
Npp.01A014640.1	Npp.01A014640.1|Npp.01A046090.1	-	-	-
Npp.01A014660.1	Npp.01A014660.1|Npp.01A014680.1	-	-	-
Npp.01A014690.1	Npp.01A014690.1|Npp.01A014670.1	Npp.01B049880.1	Npp.01C044190.1	-
Npp.01A014700.1	Npp.01A014700.1	-	-	Npp.01D017290.1
Npp.01A014730.1	Npp.01A014730.1|Npp.01A014720.1|Npp.01A014710.1	-	-	-
Npp.01A014760.1	Npp.01A014760.1	-	Npp.01C006990.1	-
Npp.01A014790.1	Npp.01A014790.1	Npp.01B017090.1	-	-
Npp.01A014800.1	Npp.01A014800.1	Npp.01B017080.1	-	-
Npp.01A014810.1	Npp.01A014810.1|Npp.01A028290.1	Npp.01B017070.1	-	-
Npp.01A014820.1	Npp.01A014820.1	Npp.01B048970.1|Npp.01B002170.1|Npp.01B047440.1	Npp.01C014620.1	-
Npp.01A014830.1	Npp.01A014830.1	Npp.01B017150.1	-	-
Npp.01A014840.1	Npp.01A014840.1	Npp.01B017160.1	-	-
Npp.01A014850.1	Npp.01A014850.1	Npp.01B017050.1	-	-
Npp.01A014860.1	Npp.01A014860.1	Npp.01B017040.1|Npp.01B017140.1	-	Npp.10D001300.1
Npp.01A014870.1	Npp.01A014870.1	Npp.01B050070.1	-	Npp.01D038230.1|Npp.01D004170.1
Npp.01A014880.1	Npp.01A014880.1|Npp.01A007380.1	Npp.01B017200.1|Npp.03B029940.1	-	-
Npp.01A014890.1	Npp.01A014890.1	Npp.01B017210.1|Npp.06B025330.1	-	-
Npp.01A014900.1	Npp.01A014900.1	Npp.01B017220.1	-	-
Npp.01A014910.1	Npp.01A014910.1|Npp.06A018640.1	Npp.01B017240.1|Npp.01B017130.1	-	-
Npp.01A014920.1	Npp.01A014920.1	Npp.01B017250.1	-	-
Npp.01A014930.1	Npp.01A014930.1|Npp.09A006740.1	Npp.01B017280.1	-	-
Npp.01A014940.1	Npp.01A014940.1	Npp.01B017290.1	-	-
Npp.01A014950.1	Npp.01A014950.1|Npp.01A002200.1	Npp.01B017300.1	Npp.07C021090.1	-
Npp.01A014960.1	Npp.01A014960.1	Npp.01B017310.1	-	-
Npp.01A014970.1	Npp.01A014970.1	Npp.01B017320.1	-	-
Npp.01A014980.1	Npp.01A014980.1|Npp.01A014990.1|Npp.01A015010.1	Npp.01B017340.1|Npp.01B017350.1	-	-
Npp.01A015000.1	Npp.01A015000.1	Npp.01B045590.1	-	-
Npp.01A015020.1	Npp.01A015020.1	Npp.01B017360.1|Npp.01B007360.1	Npp.01C014030.1	Npp.08D002000.1
Npp.01A015030.1	Npp.01A015030.1	Npp.01B017370.1	Npp.03C005830.1	-
Npp.01A015040.1	Npp.01A015040.1	-	Npp.01C014010.1|Npp.01C013990.1	-
Npp.01A015050.1	Npp.01A015050.1|Npp.05A000860.1	-	Npp.01C013980.1|Npp.01C014000.1	Npp.01D002070.1
Npp.01A015060.1	Npp.01A015060.1	-	Npp.01C013970.1	Npp.01D002080.1
Npp.01A015070.1	Npp.01A015070.1	-	Npp.01C013960.1	Npp.01D002090.1
Npp.01A015080.1	Npp.01A015080.1	Npp.10B000110.1	Npp.01C013950.1	Npp.01D002100.1
Npp.01A015090.1	Npp.01A015090.1	-	Npp.01C013940.1	Npp.01D005350.1|Npp.01D002110.1
Npp.01A015100.1	Npp.01A015100.1	-	Npp.01C013930.1	Npp.01D005360.1
Npp.01A015110.1	Npp.01A015110.1	Npp.10B000080.1	Npp.01C013920.1	Npp.01D005370.1
Npp.01A015140.1	Npp.01A015140.1	Npp.01B035960.1	-	-
Npp.01A015150.1	Npp.01A015150.1	-	Npp.01C013860.1	-
Npp.01A015160.1	Npp.01A015160.1|Npp.01A015170.1	-	Npp.01C013880.1|Npp.01C013890.1	Npp.01D005390.1
Npp.01A015180.1	Npp.01A015180.1	Npp.01B017380.1|Npp.05B011170.1	Npp.01C013900.1	Npp.01D005380.1
Npp.01A015190.1	Npp.01A015190.1|Npp.01A015120.1	Npp.01B017400.1	Npp.01C013910.1|Npp.06C009640.1	-
Npp.01A015200.1	Npp.01A015200.1|Npp.01A015130.1	Npp.01B017390.1	-	-
Npp.01A015210.1	Npp.01A015210.1|Npp.ctg114586	Npp.01B017430.1	Npp.01C013850.1	Npp.01D005410.1|Npp.06D001040.1
Npp.01A015220.1	Npp.01A015220.1	Npp.01B017420.1	Npp.01C013840.1	Npp.01D005420.1
Npp.01A015230.1	Npp.01A015230.1	Npp.01B017410.1	Npp.01C013830.1|Npp.10C013930.1	Npp.01D005430.1
Npp.01A015240.1	Npp.01A015240.1	Npp.01B017440.1	Npp.01C013820.1	Npp.01D005440.1
Npp.01A015250.1	Npp.01A015250.1	Npp.01B017450.1	Npp.01C013810.1|Npp.08C014190.1	Npp.01D005450.1
Npp.01A015260.1	Npp.01A015260.1	Npp.01B017480.1	Npp.01C013790.1	Npp.01D005470.1
Npp.01A015270.1	Npp.01A015270.1|Npp.01A022150.1	Npp.01B017490.1	Npp.01C013780.1|Npp.08C014170.1	Npp.01D005480.1
Npp.01A015280.1	Npp.01A015280.1	Npp.01B017500.1	Npp.01C013770.1	Npp.01D005490.1
Npp.01A015290.1	Npp.01A015290.1	Npp.01B017510.1	Npp.01C013760.1	Npp.01D005500.1
Npp.01A015300.1	Npp.01A015300.1	Npp.01B017520.1	Npp.01C013750.1	Npp.01D005510.1
Npp.01A015310.1	Npp.01A015310.1	Npp.01B017540.1	Npp.01C013720.1	Npp.01D005530.1
Npp.01A015320.1	Npp.01A015320.1|Npp.01A015330.1|Npp.02A000430.1	-	Npp.01C013680.1	Npp.01D005540.1
Npp.01A015340.1	Npp.01A015340.1	-	Npp.01C013670.1	Npp.01D005550.1
Npp.01A015350.1	Npp.01A015350.1	-	Npp.01C013660.1	Npp.01D005560.1
Npp.01A015360.1	Npp.01A015360.1	-	Npp.01C013650.1	Npp.01D005570.1
Npp.01A015370.1	Npp.01A015370.1	Npp.01B017550.1	Npp.01C013630.1	Npp.01D005580.1
Npp.01A015380.1	Npp.01A015380.1	Npp.01B017560.1	Npp.01C013620.1	Npp.01D005590.1
Npp.01A015390.1	Npp.01A015390.1	Npp.01B017580.1	Npp.01C013610.1	Npp.01D005600.1
Npp.01A015400.1	Npp.01A015400.1	Npp.01B017590.1	Npp.01C013600.1	Npp.01D005610.1
Npp.01A015410.1	Npp.01A015410.1	Npp.01B017610.1|Npp.08B010880.1	Npp.01C013590.1	Npp.01D005620.1
Npp.01A015420.1	Npp.01A015420.1	Npp.01B017630.1	-	Npp.01D005640.1
Npp.01A015430.1	Npp.01A015430.1	-	-	Npp.01D005650.1
Npp.01A015440.1	Npp.01A015440.1	Npp.01B017650.1	-	Npp.01D005660.1
Npp.01A015450.1	Npp.01A015450.1	Npp.01B017660.1|Npp.01B052810.1|Npp.01B011070.1	-	Npp.01D005670.1|Npp.05D024250.1
Npp.01A015460.1	Npp.01A015460.1	Npp.01B017690.1	-	Npp.01D005700.1
Npp.01A015470.1	Npp.01A015470.1	Npp.01B017700.1	-	Npp.01D005710.1
Npp.01A015480.1	Npp.01A015480.1	-	Npp.01C026450.1	Npp.01D014790.1
Npp.01A015490.1	Npp.01A015490.1	Npp.01B017710.1	-	Npp.01D005720.1
Npp.01A015500.1	Npp.01A015500.1	Npp.01B017740.1	-	Npp.01D005750.1|Npp.07D000160.1
Npp.01A015510.1	Npp.01A015510.1	Npp.01B017750.1	Npp.01C038210.1	Npp.01D005770.1
Npp.01A015520.1	Npp.01A015520.1|Npp.01A015630.1	Npp.01B017790.1|Npp.01B017800.1|Npp.01B018010.1	Npp.01C038240.1|Npp.01C038320.1	Npp.01D005810.1
Npp.01A015530.1	Npp.01A015530.1	Npp.01B017810.1	Npp.01C038250.1|Npp.01C038340.1	Npp.01D005890.1
Npp.01A015540.1	Npp.01A015540.1	Npp.01B017820.1	Npp.01C038260.1	Npp.01D005820.1
Npp.01A015550.1	Npp.01A015550.1	Npp.01B017840.1	Npp.01C038270.1	Npp.01D005830.1
Npp.01A015560.1	Npp.01A015560.1	-	Npp.06C016510.1	-
Npp.01A015570.1	Npp.01A015570.1	Npp.01B017830.1	Npp.01C038280.1	Npp.01D005840.1
Npp.01A015580.1	Npp.01A015580.1|Npp.10A002750.1	-	-	Npp.01D005850.1
Npp.01A015590.1	Npp.01A015590.1	Npp.01B017850.1	Npp.01C038290.1	Npp.01D005860.1
Npp.01A015600.1	Npp.01A015600.1	Npp.01B017860.1|Npp.01B009230.1	-	Npp.01D005870.1
Npp.01A015610.1	Npp.01A015610.1	Npp.01B017990.1	Npp.01C038310.1	Npp.01D005880.1
Npp.01A015620.1	Npp.01A015620.1	Npp.01B018000.1	-	-
Npp.01A015640.1	Npp.01A015640.1|Npp.01A015670.1	Npp.01B018030.1	Npp.01C038350.1	Npp.01D005900.1
Npp.01A015660.1	Npp.01A015660.1	Npp.01B018050.1	Npp.01C038370.1	Npp.01D005920.1
Npp.01A015680.1	Npp.01A015680.1	Npp.01B018040.1	Npp.01C038360.1	Npp.01D005910.1
Npp.01A015690.1	Npp.01A015690.1	Npp.01B018060.1	Npp.01C038380.1	Npp.01D005930.1
Npp.01A015700.1	Npp.01A015700.1	Npp.01B018070.1	Npp.01C038390.1	Npp.01D005940.1
Npp.01A015710.1	Npp.01A015710.1	-	-	Npp.01D005950.1
Npp.01A015720.1	Npp.01A015720.1	Npp.01B017960.1|Npp.01B018100.1	Npp.01C038420.1	-
Npp.01A015730.1	Npp.01A015730.1	Npp.01B017950.1|Npp.01B018110.1	-	Npp.01D005970.1
Npp.01A015740.1	Npp.01A015740.1	Npp.01B017940.1|Npp.01B018120.1	-	Npp.01D005980.1
Npp.01A015750.1	Npp.01A015750.1	Npp.01B017930.1|Npp.01B018130.1	-	Npp.01D005990.1
Npp.01A015760.1	Npp.01A015760.1	Npp.01B017920.1|Npp.01B018140.1	-	Npp.01D006000.1
Npp.01A015770.1	Npp.01A015770.1	Npp.01B017900.1|Npp.01B018150.1|Npp.02B036770.1	-	Npp.01D006010.1
Npp.01A015780.1	Npp.01A015780.1	Npp.01B017890.1|Npp.01B018160.1	-	Npp.01D006020.1
Npp.01A015790.1	Npp.01A015790.1	Npp.01B017870.1|Npp.01B018180.1	-	Npp.01D006040.1
Npp.01A015800.1	Npp.01A015800.1|Npp.09A014330.1	Npp.01B018190.1	-	Npp.01D006050.1|Npp.01D006220.1
Npp.01A015810.1	Npp.01A015810.1	Npp.01B018200.1	-	Npp.01D006060.1|Npp.01D006210.1
Npp.01A015820.1	Npp.01A015820.1	Npp.01B018210.1	-	Npp.01D006070.1|Npp.01D006200.1
Npp.01A015830.1	Npp.01A015830.1|Npp.10A007870.1	Npp.01B018220.1	-	Npp.01D006190.1
Npp.01A015840.1	Npp.01A015840.1	Npp.01B018240.1	Npp.01C038430.1	Npp.01D006110.1
Npp.01A015850.1	Npp.01A015850.1	Npp.01B018250.1	Npp.01C038440.1	Npp.01D006120.1
Npp.01A015860.1	Npp.01A015860.1	Npp.01B018260.1	Npp.01C038450.1	Npp.01D006130.1
Npp.01A015870.1	Npp.01A015870.1	Npp.01B018270.1	Npp.01C038460.1	Npp.01D006140.1
Npp.01A015880.1	Npp.01A015880.1	Npp.01B018280.1	Npp.01C038470.1	Npp.01D006150.1|Npp.01D016860.1
Npp.01A015890.1	Npp.01A015890.1	Npp.01B018290.1	Npp.01C018910.1	Npp.01D006160.1
Npp.01A015900.1	Npp.01A015900.1	-	Npp.01C018930.1|Npp.01C018920.1	Npp.01D006170.1
Npp.01A015910.1	Npp.01A015910.1	-	Npp.01C038490.1	Npp.08D009810.1
Npp.01A015920.1	Npp.01A015920.1	Npp.01B018330.1|Npp.09B013800.1	Npp.01C038500.1|Npp.01C018970.1	-
Npp.01A015930.1	Npp.01A015930.1|Npp.02A014930.1	Npp.01B018340.1	Npp.01C038520.1|Npp.01C018980.1	-
Npp.01A015940.1	Npp.01A015940.1	-	Npp.01C038530.1|Npp.01C018990.1	-
Npp.01A015950.1	Npp.01A015950.1	-	Npp.01C038540.1	-
Npp.01A015960.1	Npp.01A015960.1	Npp.01B018400.1	Npp.01C019010.1|Npp.01C038550.1|Npp.09C018730.1	-
Npp.01A015970.1	Npp.01A015970.1	Npp.01B018410.1	Npp.01C038560.1|Npp.01C019020.1	-
Npp.01A015980.1	Npp.01A015980.1|Npp.01A019180.1	Npp.01B014300.1|Npp.01B052590.1	-	Npp.01D014510.1
Npp.01A015990.1	Npp.01A015990.1	Npp.01B018430.1	Npp.01C038570.1	Npp.01D006230.1
Npp.01A016000.1	Npp.01A016000.1	Npp.01B018450.1	Npp.01C038590.1	Npp.01D006240.1
Npp.01A016010.1	Npp.01A016010.1	Npp.01B018460.1	-	Npp.01D006250.1
Npp.01A016020.1	Npp.01A016020.1	Npp.07B006250.1	Npp.01C019500.1	-
Npp.01A016030.1	Npp.01A016030.1	Npp.01B053500.1	Npp.01C022780.1	-
Npp.01A016040.1	Npp.01A016040.1	Npp.01B018480.1	Npp.01C038610.1	Npp.01D006280.1
Npp.01A016050.1	Npp.01A016050.1	-	Npp.01C024900.1	-
Npp.01A016060.1	Npp.01A016060.1	Npp.01B018490.1|Npp.05B014100.1	Npp.01C038630.1	Npp.01D006290.1
Npp.01A016070.1	Npp.01A016070.1	Npp.01B018500.1	Npp.01C038620.1	Npp.01D006300.1
Npp.01A016080.1	Npp.01A016080.1	Npp.01B018510.1	Npp.01C038650.1	Npp.01D006310.1
Npp.01A016090.1	Npp.01A016090.1	Npp.01B018520.1	Npp.01C038640.1	Npp.01D006320.1
Npp.01A016100.1	Npp.01A016100.1	Npp.01B018530.1	-	Npp.01D006330.1
Npp.01A016110.1	Npp.01A016110.1	Npp.01B018540.1	Npp.01C038660.1	Npp.01D006340.1
Npp.01A016120.1	Npp.01A016120.1	Npp.01B018550.1	Npp.01C038670.1	Npp.01D006350.1
Npp.01A016130.1	Npp.01A016130.1	Npp.01B018560.1	Npp.01C038680.1	Npp.01D006360.1
Npp.01A016140.1	Npp.01A016140.1	Npp.01B018570.1	Npp.01C038690.1	Npp.01D006370.1
Npp.01A016150.1	Npp.01A016150.1	Npp.01B018580.1	Npp.01C038700.1|Npp.08C006530.1	Npp.01D006380.1
Npp.01A016170.1	Npp.01A016170.1	Npp.01B018600.1	Npp.01C038720.1	-
Npp.01A016180.1	Npp.01A016180.1	Npp.01B018590.1	Npp.01C038710.1|Npp.09C010230.1	Npp.01D006400.1|Npp.01D006390.1
Npp.01A016190.1	Npp.01A016190.1	Npp.01B018620.1	Npp.01C038740.1	Npp.01D006410.1
Npp.01A016200.1	Npp.01A016200.1	Npp.01B018630.1	Npp.01C038750.1	Npp.01D006430.1
Npp.01A016210.1	Npp.01A016210.1|Npp.01A016580.1	-	Npp.01C038760.1	Npp.01D006440.1
Npp.01A016220.1	Npp.01A016220.1|Npp.01A016590.1	-	Npp.01C038770.1	Npp.01D006450.1
Npp.01A016230.1	Npp.01A016230.1|Npp.01A016600.1	-	Npp.01C038780.1	Npp.01D006460.1
Npp.01A016240.1	Npp.01A016240.1|Npp.01A016610.1	-	Npp.01C038790.1	Npp.01D006470.1
Npp.01A016250.1	Npp.01A016250.1|Npp.01A016620.1	-	Npp.01C038800.1	Npp.01D006480.1
Npp.01A016260.1	Npp.01A016260.1|Npp.01A016630.1	-	Npp.01C038810.1|Npp.06C004700.1	Npp.01D006490.1
Npp.01A016270.1	Npp.01A016270.1|Npp.01A037520.1	-	Npp.01C038820.1	Npp.01D006500.1
Npp.01A016280.1	Npp.01A016280.1|Npp.01A016640.1	-	Npp.01C038830.1	Npp.01D006510.1
Npp.01A016290.1	Npp.01A016290.1|Npp.01A016650.1	-	Npp.01C038840.1	Npp.01D006550.1
Npp.01A016300.1	Npp.01A016300.1|Npp.01A016330.1|Npp.01A016340.1|Npp.01A016350.1	Npp.01B011010.1|Npp.01B020320.1|Npp.01B033540.1	-	Npp.01D006530.1|Npp.01D006600.1|Npp.01D020960.1
Npp.01A016310.1	Npp.01A016310.1|Npp.01A016680.1	-	Npp.01C038870.1	Npp.01D006570.1
Npp.01A016320.1	Npp.01A016320.1|Npp.01A016670.1|Npp.01A016710.1|Npp.01A016690.1	Npp.01B020310.1	Npp.01C038880.1	Npp.01D006580.1
Npp.01A016360.1	Npp.01A016360.1|Npp.01A016730.1	Npp.01B020300.1	-	Npp.01D006590.1|Npp.01D006620.1
Npp.01A016370.1	Npp.01A016370.1	Npp.01B020290.1	-	Npp.01D006610.1
Npp.01A016380.1	Npp.01A016380.1|Npp.01A016740.1	Npp.01B020110.1|Npp.01B020280.1	-	-
Npp.01A016390.1	Npp.01A016390.1|Npp.01A016750.1	Npp.01B020090.1|Npp.01B020270.1	-	-
Npp.01A016410.1	Npp.01A016410.1|Npp.01A016760.1	Npp.01B020070.1|Npp.01B020260.1	-	-
Npp.01A016420.1	Npp.01A016420.1|Npp.01A016770.1	Npp.01B020060.1|Npp.01B020250.1	-	-
Npp.01A016430.1	Npp.01A016430.1|Npp.01A016780.1	Npp.01B020040.1|Npp.01B020230.1	-	-
Npp.01A016440.1	Npp.01A016440.1|Npp.01A016790.1	Npp.01B020030.1|Npp.01B020220.1	-	-
Npp.01A016450.1	Npp.01A016450.1|Npp.01A016800.1	Npp.01B020020.1	-	Npp.01D006710.1
Npp.01A016460.1	Npp.01A016460.1|Npp.01A016810.1	Npp.01B020010.1	-	Npp.01D006700.1
Npp.01A016480.1	Npp.01A016480.1|Npp.01A016830.1|Npp.01A016470.1|Npp.01A016820.1	Npp.01B020000.1	-	Npp.01D006690.1
Npp.01A016490.1	Npp.01A016490.1|Npp.01A016840.1|Npp.07A002320.1	Npp.01B019990.1	-	Npp.01D006680.1
Npp.01A016500.1	Npp.01A016500.1|Npp.01A016850.1|Npp.09A007970.1	Npp.01B019980.1	Npp.10C022670.1	Npp.01D006670.1
Npp.01A016510.1	Npp.01A016510.1|Npp.01A016860.1	Npp.01B019970.1	-	Npp.01D006650.1
Npp.01A016520.1	Npp.01A016520.1|Npp.01A016870.1	Npp.01B019960.1	-	Npp.01D006640.1|Npp.06D017640.1
Npp.01A016530.1	Npp.01A016530.1|Npp.01A016880.1	Npp.01B019950.1|Npp.09B012490.1	-	Npp.01D006630.1
Npp.01A016540.1	Npp.01A016540.1|Npp.01A016890.1	Npp.01B019940.1	-	-
Npp.01A016560.1	Npp.01A016560.1|Npp.01A016900.1	Npp.01B019910.1	-	-
Npp.01A016660.1	Npp.01A016660.1|Npp.01A022590.1	-	Npp.01C038850.1	Npp.01D002910.1
Npp.01A016700.1	Npp.01A016700.1	-	-	Npp.01D006080.1|Npp.01D020330.1
Npp.01A016920.1	Npp.01A016920.1|Npp.01A017410.1|Npp.03A003340.1	Npp.01B019900.1	-	Npp.01D002120.1
Npp.01A016930.1	Npp.01A016930.1	Npp.01B002320.1|Npp.01B054090.1	-	-
Npp.01A016940.1	Npp.01A016940.1|Npp.01A017470.1	Npp.01B019850.1	-	-
Npp.01A016950.1	Npp.01A016950.1|Npp.01A017460.1	Npp.01B019860.1	-	Npp.01D002160.1
Npp.01A016960.1	Npp.01A016960.1|Npp.01A017450.1	Npp.01B019870.1	-	Npp.01D002150.1
Npp.01A016970.1	Npp.01A016970.1|Npp.01A017440.1|Npp.02A011640.1	Npp.01B019880.1|Npp.01B034040.1	-	Npp.01D002140.1
Npp.01A016990.1	Npp.01A016990.1|Npp.01A017420.1|Npp.01A017010.1	Npp.01B019890.1	-	Npp.01D002130.1
Npp.01A017000.1	Npp.01A017000.1	Npp.01B019920.1|Npp.01B019930.1	-	-
Npp.01A017020.1	Npp.01A017020.1	Npp.01B018760.1|Npp.07B000170.1	-	-
Npp.01A017030.1	Npp.01A017030.1|Npp.01A018180.1	Npp.01B018780.1|Npp.01B018770.1	Npp.01C014560.1	-
Npp.01A017040.1	Npp.01A017040.1	-	Npp.01C046740.1	-
Npp.01A017050.1	Npp.01A017050.1|Npp.01A018190.1	Npp.01B018790.1	Npp.01C014570.1	-
Npp.01A017080.1	Npp.01A017080.1|Npp.01A018230.1	Npp.01B018810.1	Npp.01C014590.1	-
Npp.01A017090.1	Npp.01A017090.1|Npp.01A018250.1	Npp.01B018830.1	-	-
Npp.01A017100.1	Npp.01A017100.1|Npp.01A018260.1	Npp.01B018840.1	-	-
Npp.01A017110.1	Npp.01A017110.1|Npp.01A018270.1|Npp.01A018290.1	-	Npp.01C014610.1	-
Npp.01A017120.1	Npp.01A017120.1|Npp.01A027810.1	-	-	Npp.01D005780.1
Npp.01A017130.1	Npp.01A017130.1|Npp.01A018300.1	Npp.01B018860.1	Npp.01C014630.1	-
Npp.01A017140.1	Npp.01A017140.1|Npp.01A018310.1	Npp.01B018870.1	Npp.01C014650.1	-
Npp.01A017170.1	Npp.01A017170.1|Npp.01A018350.1	-	Npp.01C014700.1|Npp.01C014750.1|Npp.02C028520.1	-
Npp.01A017180.1	Npp.01A017180.1|Npp.01A018330.1|Npp.01A017160.1	Npp.01B018890.1	Npp.01C014760.1	-
Npp.01A017190.1	Npp.01A017190.1	Npp.01B018900.1	Npp.01C014780.1	-
Npp.01A017200.1	Npp.01A017200.1|Npp.01A018320.1|Npp.01A017150.1	Npp.01B018880.1	Npp.01C014670.1	-
Npp.01A017210.1	Npp.01A017210.1	-	Npp.01C014720.1	-
Npp.01A017220.1	Npp.01A017220.1|Npp.01A018370.1	Npp.01B018910.1	Npp.01C014790.1	-
Npp.01A017230.1	Npp.01A017230.1|Npp.01A018390.1	Npp.01B018930.1	Npp.01C014810.1	-
Npp.01A017240.1	Npp.01A017240.1|Npp.01A018400.1	Npp.01B018940.1	Npp.01C014820.1	-
Npp.01A017250.1	Npp.01A017250.1	-	Npp.01C034640.1|Npp.01C029030.1	-
Npp.01A017260.1	Npp.01A017260.1|Npp.01A018410.1	Npp.01B018950.1	Npp.01C014830.1	-
Npp.01A017270.1	Npp.01A017270.1|Npp.01A018430.1	Npp.01B018960.1	Npp.01C014840.1	-
Npp.01A017280.1	Npp.01A017280.1|Npp.01A018440.1	Npp.01B018970.1	Npp.01C014850.1	-
Npp.01A017290.1	Npp.01A017290.1|Npp.01A018450.1	Npp.01B018980.1	-	Npp.01D001830.1
Npp.01A017300.1	Npp.01A017300.1|Npp.01A018460.1	Npp.01B018990.1	-	Npp.01D001840.1
Npp.01A017310.1	Npp.01A017310.1|Npp.01A018470.1	Npp.01B019000.1	-	Npp.01D001850.1
Npp.01A017330.1	Npp.01A017330.1|Npp.01A018500.1	Npp.01B019030.1	-	Npp.01D001870.1
Npp.01A017340.1	Npp.01A017340.1|Npp.01A018490.1	Npp.01B019020.1	-	Npp.01D001860.1
Npp.01A017350.1	Npp.01A017350.1|Npp.01A018480.1|Npp.01A017320.1	Npp.01B019010.1	-	Npp.07D018600.1
Npp.01A017360.1	Npp.01A017360.1|Npp.01A018510.1	Npp.01B019040.1	-	Npp.01D001890.1
Npp.01A017370.1	Npp.01A017370.1|Npp.01A018520.1	Npp.01B019050.1	-	Npp.01D001900.1
Npp.01A017380.1	Npp.01A017380.1	Npp.01B019060.1	Npp.05C008600.1	-
Npp.01A017390.1	Npp.01A017390.1	-	-	Npp.01D012980.1
Npp.01A017400.1	Npp.01A017400.1|Npp.01A018530.1	Npp.01B019070.1|Npp.01B014020.1	Npp.01C014860.1	Npp.01D001910.1
Npp.01A017480.1	Npp.01A017480.1	Npp.01B019840.1	-	Npp.01D002170.1|Npp.06D000050.1|Npp.06D000030.1
Npp.01A017490.1	Npp.01A017490.1	Npp.01B019830.1	Npp.01C014140.1|Npp.04C029190.1	-
Npp.01A017500.1	Npp.01A017500.1	Npp.01B019820.1	Npp.01C014150.1	Npp.01D006720.1
Npp.01A017510.1	Npp.01A017510.1	-	-	Npp.01D006730.1
Npp.01A017520.1	Npp.01A017520.1	Npp.01B019800.1	Npp.01C014160.1	Npp.01D006740.1
Npp.01A017530.1	Npp.01A017530.1	Npp.01B019810.1	-	-
Npp.01A017540.1	Npp.01A017540.1	Npp.01B019790.1	Npp.01C014170.1	Npp.01D006750.1
Npp.01A017550.1	Npp.01A017550.1	-	Npp.01C014180.1	Npp.01D006760.1
Npp.01A017560.1	Npp.01A017560.1	Npp.01B019770.1|Npp.01B019760.1	Npp.01C014200.1	Npp.01D006770.1
Npp.01A017570.1	Npp.01A017570.1	Npp.01B019750.1	Npp.01C014220.1	Npp.01D006790.1
Npp.01A017580.1	Npp.01A017580.1	Npp.01B019740.1	Npp.01C014230.1	Npp.01D006800.1
Npp.01A017590.1	Npp.01A017590.1	Npp.01B019730.1	Npp.01C014240.1	Npp.01D006810.1
Npp.01A017600.1	Npp.01A017600.1	Npp.01B019720.1	Npp.01C014250.1	Npp.01D006820.1
Npp.01A017610.1	Npp.01A017610.1|Npp.01A014650.1	Npp.01B019710.1	Npp.01C014260.1	Npp.01D006830.1
Npp.01A017620.1	Npp.01A017620.1	Npp.01B019680.1	Npp.01C014270.1	Npp.01D006840.1
Npp.01A017630.1	Npp.01A017630.1	Npp.01B019660.1	Npp.01C014300.1	Npp.01D006850.1
Npp.01A017640.1	Npp.01A017640.1|Npp.01A017660.1	Npp.01B019650.1|Npp.01B019640.1	Npp.01C014310.1|Npp.02C016690.1	Npp.01D006870.1|Npp.01D006880.1|Npp.01D006860.1
Npp.01A017680.1	Npp.01A017680.1|Npp.01A017710.1|Npp.01A017670.1	Npp.01B019630.1	Npp.01C000100.1	Npp.01D006890.1
Npp.01A017700.1	Npp.01A017700.1|Npp.01A017690.1	Npp.01B019620.1	-	Npp.01D006900.1|Npp.01D006910.1
Npp.01A017720.1	Npp.01A017720.1	-	Npp.01C000090.1	-
Npp.01A017730.1	Npp.01A017730.1	Npp.01B019610.1	Npp.01C000080.1	Npp.01D006920.1
Npp.01A017740.1	Npp.01A017740.1	Npp.01B019600.1	Npp.01C000070.1	Npp.01D006930.1
Npp.01A017750.1	Npp.01A017750.1	Npp.01B019590.1	-	-
Npp.01A017760.1	Npp.01A017760.1	Npp.01B019580.1	Npp.01C000060.1	Npp.03D000040.1
Npp.01A017770.1	Npp.01A017770.1	Npp.01B019560.1|Npp.05B027700.1	-	Npp.01D006950.1
Npp.01A017780.1	Npp.01A017780.1|Npp.01A018900.1	Npp.01B019550.1	-	Npp.01D006960.1
Npp.01A017790.1	Npp.01A017790.1	Npp.01B019520.1	-	Npp.01D007230.1
Npp.01A017800.1	Npp.01A017800.1	Npp.01B019440.1|Npp.01B019500.1	-	-
Npp.01A017810.1	Npp.01A017810.1	Npp.01B019450.1	-	Npp.01D007000.1
Npp.01A017820.1	Npp.01A017820.1	Npp.01B019460.1|Npp.01B019430.1	-	Npp.01D007010.1
Npp.01A017830.1	Npp.01A017830.1	Npp.01B019470.1|Npp.01B019390.1	-	Npp.01D007020.1
Npp.01A017850.1	Npp.01A017850.1	Npp.01B019480.1	-	Npp.01D007030.1
Npp.01A017860.1	Npp.01A017860.1	Npp.01B019380.1|Npp.01B019490.1	-	Npp.01D007040.1
Npp.01A017870.1	Npp.01A017870.1|Npp.01A017910.1	Npp.01B019330.1|Npp.01B018850.1|Npp.01B019340.1	Npp.01C014340.1|Npp.10C020520.1	Npp.01D007120.1|Npp.01D007100.1|Npp.01D007090.1
Npp.01A017880.1	Npp.01A017880.1	Npp.01B019360.1	Npp.01C014320.1	-
Npp.01A017890.1	Npp.01A017890.1	Npp.01B019350.1	Npp.01C014330.1	Npp.01D007060.1
Npp.01A017900.1	Npp.01A017900.1	Npp.05B016480.1	-	Npp.01D007080.1
Npp.01A017920.1	Npp.01A017920.1	Npp.06B008060.1	-	Npp.01D007110.1
Npp.01A017930.1	Npp.01A017930.1	Npp.01B034140.1	-	-
Npp.01A017940.1	Npp.01A017940.1	-	Npp.01C014350.1	-
Npp.01A017950.1	Npp.01A017950.1	Npp.01B019320.1	Npp.01C014360.1	Npp.01D007130.1
Npp.01A017960.1	Npp.01A017960.1	Npp.01B019310.1	Npp.01C014370.1	Npp.01D007140.1
Npp.01A017970.1	Npp.01A017970.1	Npp.01B019300.1	Npp.01C014380.1|Npp.05C021470.1	Npp.01D007150.1
Npp.01A017980.1	Npp.01A017980.1	Npp.01B019290.1	Npp.01C014390.1	Npp.01D007160.1
Npp.01A017990.1	Npp.01A017990.1	Npp.01B019280.1	Npp.01C014400.1	Npp.01D007170.1
Npp.01A018000.1	Npp.01A018000.1	-	Npp.01C037480.1	Npp.01D024120.1
Npp.01A018010.1	Npp.01A018010.1	Npp.01B019260.1	Npp.01C014420.1	Npp.01D007190.1|Npp.01D002580.1|Npp.02D038580.1
Npp.01A018020.1	Npp.01A018020.1|Npp.04A038000.1	Npp.01B019250.1	Npp.01C014430.1	Npp.01D007200.1
Npp.01A018040.1	Npp.01A018040.1	Npp.01B019240.1	Npp.01C014440.1	Npp.01D007210.1
Npp.01A018050.1	Npp.01A018050.1	Npp.01B019230.1	-	Npp.01D007220.1
Npp.01A018060.1	Npp.01A018060.1	Npp.01B018640.1|Npp.01B018660.1	-	-
Npp.01A018070.1	Npp.01A018070.1	Npp.01B018650.1|Npp.01B019190.1|Npp.01B019200.1	Npp.01C014450.1	-
Npp.01A018080.1	Npp.01A018080.1	Npp.01B018670.1|Npp.01B019180.1	Npp.01C014460.1	-
Npp.01A018090.1	Npp.01A018090.1	Npp.01B018680.1|Npp.01B019170.1	Npp.01C014470.1	-
Npp.01A018100.1	Npp.01A018100.1	Npp.01B018690.1|Npp.01B019160.1	Npp.01C014480.1	-
Npp.01A018110.1	Npp.01A018110.1	Npp.01B018700.1|Npp.01B019150.1	Npp.01C014490.1	-
Npp.01A018120.1	Npp.01A018120.1	Npp.01B019130.1	-	-
Npp.01A018130.1	Npp.01A018130.1	-	Npp.01C014500.1	-
Npp.01A018140.1	Npp.01A018140.1	Npp.01B018720.1|Npp.01B019110.1	Npp.01C014510.1	-
Npp.01A018150.1	Npp.01A018150.1|Npp.01A012800.1|Npp.01A013880.1	Npp.01B018730.1|Npp.01B019100.1	Npp.01C014530.1	-
Npp.01A018160.1	Npp.01A018160.1	Npp.01B018740.1|Npp.01B019090.1	Npp.01C014540.1	-
Npp.01A018170.1	Npp.01A018170.1	Npp.01B018750.1|Npp.01B019080.1	Npp.01C014550.1	-
Npp.01A018210.1	Npp.01A018210.1|Npp.01A017060.1	Npp.01B018800.1	Npp.01C014580.1	-
Npp.01A018220.1	Npp.01A018220.1|Npp.01A017070.1	-	-	-
Npp.01A018240.1	Npp.01A018240.1	Npp.01B018820.1	-	-
Npp.01A018280.1	Npp.01A018280.1|Npp.01A019840.1	-	Npp.01C014600.1	-
Npp.01A018340.1	Npp.01A018340.1|Npp.02A026150.1	-	Npp.01C014690.1|Npp.01C014740.1	Npp.01D008190.1
Npp.01A018360.1	Npp.01A018360.1	-	Npp.01C014680.1|Npp.01C014710.1	-
Npp.01A018380.1	Npp.01A018380.1	Npp.01B018920.1	Npp.01C014800.1	-
Npp.01A018420.1	Npp.01A018420.1	-	-	-
Npp.01A018540.1	Npp.01A018540.1	Npp.01B014030.1	Npp.01C014870.1	Npp.01D001920.1
Npp.01A018550.1	Npp.01A018550.1	Npp.01B014040.1	-	Npp.01D001930.1
Npp.01A018560.1	Npp.01A018560.1	Npp.01B014050.1	Npp.01C014880.1	-
Npp.01A018570.1	Npp.01A018570.1	Npp.01B014060.1	Npp.01C014890.1	Npp.01D001940.1
Npp.01A018580.1	Npp.01A018580.1|Npp.01A018590.1	-	Npp.01C014900.1|Npp.01C014910.1	Npp.01D001970.1|Npp.01D001960.1
Npp.01A018600.1	Npp.01A018600.1	-	Npp.01C014920.1	Npp.01D001980.1|Npp.01D016820.1
Npp.01A018610.1	Npp.01A018610.1	Npp.10B013180.1	Npp.01C014930.1	Npp.01D001990.1
Npp.01A018620.1	Npp.01A018620.1	-	Npp.01C014980.1	Npp.01D002000.1
Npp.01A018630.1	Npp.01A018630.1	-	Npp.01C015000.1	Npp.01D002050.1|Npp.03D036900.1
Npp.01A018640.1	Npp.01A018640.1	Npp.01B014090.1	Npp.01C015010.1	Npp.01D002060.1
Npp.01A018660.1	Npp.01A018660.1|Npp.01A020240.1	Npp.01B014080.1	Npp.01C015020.1	-
Npp.01A018670.1	Npp.01A018670.1|Npp.01A020250.1	Npp.01B014100.1	Npp.01C015040.1	Npp.05D015250.1
Npp.01A018680.1	Npp.01A018680.1|Npp.01A020260.1	Npp.01B014110.1|Npp.08B002150.1	Npp.01C015050.1	-
Npp.01A018690.1	Npp.01A018690.1|Npp.01A020280.1	Npp.01B014130.1	Npp.01C015070.1	-
Npp.01A018700.1	Npp.01A018700.1|Npp.01A020290.1	Npp.01B014140.1	Npp.01C015080.1	-
Npp.01A018710.1	Npp.01A018710.1|Npp.01A020300.1	Npp.01B014160.1	Npp.01C015090.1	-
Npp.01A018720.1	Npp.01A018720.1|Npp.01A020310.1	Npp.01B014170.1	Npp.01C015100.1	-
Npp.01A018730.1	Npp.01A018730.1|Npp.01A020320.1	Npp.01B014180.1	Npp.01C015110.1|Npp.09C016890.1	-
Npp.01A018740.1	Npp.01A018740.1|Npp.01A020340.1	Npp.01B014190.1	Npp.01C015130.1	-
Npp.01A018750.1	Npp.01A018750.1|Npp.01A020350.1	Npp.01B014200.1	Npp.01C015140.1	-
Npp.01A018760.1	Npp.01A018760.1	-	Npp.01C015150.1	Npp.01D040000.1
Npp.01A018770.1	Npp.01A018770.1	Npp.01B014230.1	-	-
Npp.01A018780.1	Npp.01A018780.1|Npp.01A020360.1	Npp.01B014220.1	-	Npp.01D007240.1
Npp.01A018790.1	Npp.01A018790.1|Npp.01A020370.1	-	-	Npp.01D007250.1
Npp.01A018800.1	Npp.01A018800.1|Npp.01A020380.1|Npp.01A049430.1	-	Npp.01C015160.1	Npp.01D007260.1
Npp.01A018810.1	Npp.01A018810.1|Npp.01A018830.1	-	Npp.01C022590.1	Npp.01D007280.1
Npp.01A018820.1	Npp.01A018820.1|Npp.01A020390.1	-	Npp.01C015170.1	Npp.01D007270.1
Npp.01A018840.1	Npp.01A018840.1|Npp.01A020410.1	-	Npp.01C015190.1	Npp.01D007300.1
Npp.01A018850.1	Npp.01A018850.1|Npp.01A020420.1	-	Npp.01C015210.1|Npp.02C041790.1	Npp.01D007310.1
Npp.01A018860.1	Npp.01A018860.1|Npp.01A020430.1	-	Npp.01C015220.1	Npp.01D007320.1
Npp.01A018870.1	Npp.01A018870.1	-	-	-
Npp.01A018880.1	Npp.01A018880.1|Npp.01A020450.1	-	Npp.01C015240.1	Npp.01D007340.1
Npp.01A018890.1	Npp.01A018890.1|Npp.01A020460.1	-	-	Npp.01D007350.1
Npp.01A018910.1	Npp.01A018910.1|Npp.01A018920.1|Npp.01A022030.1	Npp.01B021340.1	-	Npp.01D008550.1
Npp.01A018930.1	Npp.01A018930.1|Npp.01A022010.1|Npp.01A022020.1|Npp.01A022050.1	-	-	Npp.01D008690.1
Npp.01A018940.1	Npp.01A018940.1|Npp.01A022000.1	Npp.01B021330.1	-	Npp.01D008540.1
Npp.01A018960.1	Npp.01A018960.1|Npp.10A011690.1	-	Npp.01C019920.1	Npp.01D012720.1
Npp.01A018970.1	Npp.01A018970.1	Npp.08B014510.1	-	-
Npp.01A018980.1	Npp.01A018980.1|Npp.01A021980.1	Npp.01B021320.1	-	Npp.01D008520.1
Npp.01A018990.1	Npp.01A018990.1|Npp.01A021970.1	Npp.01B021310.1	-	-
Npp.01A019000.1	Npp.01A019000.1|Npp.01A021960.1	Npp.01B021300.1	Npp.01C016480.1	Npp.01D008510.1|Npp.01D008700.1
Npp.01A019010.1	Npp.01A019010.1	Npp.01B021280.1	Npp.01C016490.1	Npp.09D000580.1
Npp.01A019020.1	Npp.01A019020.1|Npp.01A019030.1|Npp.01A019040.1|Npp.01A019060.1|Npp.01A021920.1|Npp.01A021930.1|Npp.01A021950.1|Npp.01A021940.1	Npp.01B021260.1|Npp.01B021270.1|Npp.01B021290.1	Npp.01C016460.1|Npp.01C016470.1	Npp.01D008500.1
Npp.01A019050.1	Npp.01A019050.1	-	Npp.01C042030.1	-
Npp.01A019070.1	Npp.01A019070.1|Npp.01A021910.1	Npp.01B021250.1	Npp.01C016450.1	-
Npp.01A019080.1	Npp.01A019080.1|Npp.01A019090.1|Npp.01A019120.1|Npp.01A021840.1|Npp.01A021890.1|Npp.01A021900.1	Npp.01B020920.1|Npp.01B020930.1|Npp.01B020940.1|Npp.01B020950.1|Npp.01B020960.1|Npp.01B020990.1|Npp.01B021220.1|Npp.01B021230.1|Npp.01B020980.1	Npp.01C016410.1|Npp.01C016440.1	-
Npp.01A019100.1	Npp.01A019100.1|Npp.01A021880.1	Npp.01B021200.1	-	-
Npp.01A019110.1	Npp.01A019110.1|Npp.01A021850.1	Npp.01B021190.1|Npp.01B020970.1	Npp.01C016400.1	Npp.ctg027839
Npp.01A019130.1	Npp.01A019130.1	Npp.01B044350.1	-	-
Npp.01A019140.1	Npp.01A019140.1	Npp.01B044340.1	-	-
Npp.01A019150.1	Npp.01A019150.1	Npp.01B044330.1	Npp.01C037710.1|Npp.09C017240.1	Npp.01D030410.1|Npp.01D035920.1
Npp.01A019160.1	Npp.01A019160.1	Npp.01B044320.1	Npp.01C037700.1	Npp.01D030400.1
Npp.01A019170.1	Npp.01A019170.1	Npp.01B044040.1|Npp.01B044200.1	Npp.01C037530.1	-
Npp.01A019190.1	Npp.01A019190.1	Npp.01B043790.1|Npp.01B043930.1|Npp.09B020530.1	-	-
Npp.01A019200.1	Npp.01A019200.1	Npp.01B043800.1|Npp.01B043940.1	-	Npp.01D030250.1
Npp.01A019210.1	Npp.01A019210.1	Npp.01B043840.1|Npp.01B043950.1	-	Npp.01D030260.1
Npp.01A019220.1	Npp.01A019220.1	Npp.01B043850.1|Npp.01B043960.1	-	Npp.01D030270.1
Npp.01A019230.1	Npp.01A019230.1|Npp.07A022410.1	Npp.01B043860.1|Npp.01B043970.1	-	Npp.01D030280.1
Npp.01A019240.1	Npp.01A019240.1	Npp.01B043760.1	Npp.01C035940.1|Npp.09C021750.1	-
Npp.01A019250.1	Npp.01A019250.1	Npp.01B043750.1	Npp.01C035930.1	-
Npp.01A019260.1	Npp.01A019260.1	Npp.01B043730.1	Npp.01C035910.1|Npp.09C021720.1	-
Npp.01A019270.1	Npp.01A019270.1	Npp.01B043720.1	Npp.09C021710.1	-
Npp.01A019280.1	Npp.01A019280.1	Npp.01B043710.1	-	-
Npp.01A019290.1	Npp.01A019290.1	Npp.01B043680.1	Npp.01C035890.1	Npp.01D030230.1
Npp.01A019300.1	Npp.01A019300.1	Npp.01B043670.1	-	Npp.01D030220.1
Npp.01A019310.1	Npp.01A019310.1	Npp.01B043660.1	Npp.01C037460.1|Npp.01C035900.1|Npp.01C034050.1	Npp.01D030200.1
Npp.01A019320.1	Npp.01A019320.1	Npp.01B043650.1	Npp.01C037450.1	-
Npp.01A019330.1	Npp.01A019330.1	Npp.01B043640.1	Npp.01C037440.1	-
Npp.01A019340.1	Npp.01A019340.1	Npp.01B043630.1	Npp.01C037430.1|Npp.04C013090.1	-
Npp.01A019350.1	Npp.01A019350.1	Npp.01B043620.1|Npp.01B043600.1|Npp.01B043590.1	Npp.01C037420.1	-
Npp.01A019360.1	Npp.01A019360.1	Npp.01B043580.1	Npp.01C037410.1	-
Npp.01A019370.1	Npp.01A019370.1	Npp.01B043570.1	Npp.01C037400.1	-
Npp.01A019380.1	Npp.01A019380.1	-	-	-
Npp.01A019390.1	Npp.01A019390.1	Npp.01B043560.1	Npp.01C037380.1	-
Npp.01A019400.1	Npp.01A019400.1	Npp.01B043550.1	Npp.01C037370.1	-
Npp.01A019410.1	Npp.01A019410.1	Npp.01B043540.1	Npp.01C037360.1	-
Npp.01A019420.1	Npp.01A019420.1|Npp.01A019440.1|Npp.01A019430.1	Npp.01B043530.1|Npp.01B043510.1|Npp.01B043520.1	Npp.01C037350.1|Npp.01C037340.1	Npp.01D030120.1
Npp.01A019450.1	Npp.01A019450.1	Npp.01B043500.1	Npp.01C037330.1	Npp.01D030130.1
Npp.01A019460.1	Npp.01A019460.1	-	Npp.01C006900.1|Npp.01C033100.1	-
Npp.01A019470.1	Npp.01A019470.1	Npp.01B043490.1	Npp.01C037310.1	-
Npp.01A019490.1	Npp.01A019490.1|Npp.01A019500.1|Npp.01A019480.1	Npp.01B043480.1	Npp.01C037290.1	-
Npp.01A019510.1	Npp.01A019510.1	Npp.01B043470.1	Npp.01C037280.1	Npp.01D030190.1
Npp.01A019520.1	Npp.01A019520.1	Npp.01B043460.1	Npp.01C037270.1	Npp.01D030180.1
Npp.01A019530.1	Npp.01A019530.1	Npp.01B043450.1	Npp.01C037260.1	Npp.01D030170.1
Npp.01A019540.1	Npp.01A019540.1	Npp.01B043440.1|Npp.01B043430.1	Npp.04C013890.1	Npp.01D030160.1
Npp.01A019550.1	Npp.01A019550.1	Npp.01B043420.1	Npp.01C037250.1	Npp.01D030150.1
Npp.01A019580.1	Npp.01A019580.1|Npp.01A019560.1|Npp.01A019570.1|Npp.08A012190.1	Npp.01B043410.1	Npp.01C037240.1|Npp.08C013470.1	-
Npp.01A019590.1	Npp.01A019590.1	Npp.01B043390.1	Npp.01C037220.1	-
Npp.01A019600.1	Npp.01A019600.1	Npp.01B043200.1|Npp.01B043380.1|Npp.01B043370.1	Npp.01C037210.1	-
Npp.01A019610.1	Npp.01A019610.1	Npp.01B043360.1	Npp.01C037190.1	Npp.01D030110.1|Npp.08D015120.1
Npp.01A019620.1	Npp.01A019620.1	Npp.01B043350.1|Npp.09B000730.1	Npp.01C037180.1	Npp.01D030100.1
Npp.01A019630.1	Npp.01A019630.1	Npp.01B043340.1	Npp.01C037170.1	Npp.01D030090.1
Npp.01A019640.1	Npp.01A019640.1	Npp.01B025210.1	-	Npp.01D012290.1
Npp.01A019650.1	Npp.01A019650.1	Npp.01B025200.1	-	Npp.01D012280.1
Npp.01A019660.1	Npp.01A019660.1	Npp.01B025190.1	-	Npp.05D019550.1
Npp.01A019670.1	Npp.01A019670.1	Npp.01B041680.1	-	-
Npp.01A019690.1	Npp.01A019690.1	Npp.01B025160.1	-	Npp.01D012250.1|Npp.06D022400.1
Npp.01A019700.1	Npp.01A019700.1|Npp.01A036740.1	-	-	Npp.01D012930.1
Npp.01A019710.1	Npp.01A019710.1	Npp.01B025150.1	-	Npp.01D012240.1
Npp.01A019720.1	Npp.01A019720.1|Npp.01A045660.1	Npp.01B025140.1|Npp.01B048330.1	Npp.01C042070.1|Npp.01C042090.1	Npp.01D012230.1|Npp.06D022420.1
Npp.01A019730.1	Npp.01A019730.1|Npp.01A025100.1|Npp.01A045670.1|Npp.01A019740.1	Npp.01B025130.1|Npp.01B048340.1	Npp.01C042110.1|Npp.01C042000.1	Npp.01D012210.1
Npp.01A019750.1	Npp.01A019750.1|Npp.01A025090.1	Npp.01B025110.1	-	Npp.01D012200.1
Npp.01A019760.1	Npp.01A019760.1|Npp.01A025080.1	Npp.01B025100.1	-	Npp.01D012190.1
Npp.01A019770.1	Npp.01A019770.1	Npp.01B025090.1	Npp.01C042170.1	Npp.01D012180.1|Npp.01D036050.1
Npp.01A019780.1	Npp.01A019780.1|Npp.01A025070.1	Npp.01B025080.1	-	Npp.01D012170.1
Npp.01A019790.1	Npp.01A019790.1	Npp.01B000350.1	-	-
Npp.01A019800.1	Npp.01A019800.1|Npp.01A025060.1	Npp.01B025070.1	-	Npp.01D012160.1
Npp.01A019810.1	Npp.01A019810.1|Npp.01A025050.1	Npp.01B025060.1	-	Npp.01D012140.1
Npp.01A019830.1	Npp.01A019830.1|Npp.01A025010.1|Npp.01A045740.1|Npp.01A025020.1	Npp.01B025040.1|Npp.01B048520.1|Npp.04B024310.1	Npp.01C042310.1|Npp.03C002710.1	Npp.01D012100.1
Npp.01A019850.1	Npp.01A019850.1|Npp.01A039630.1|Npp.01A030310.1	-	-	-
Npp.01A019860.1	Npp.01A019860.1|Npp.01A024980.1|Npp.01A045750.1	Npp.01B025020.1|Npp.01B048530.1	Npp.01C042320.1	Npp.01D012090.1
Npp.01A019870.1	Npp.01A019870.1|Npp.01A024970.1	Npp.01B025010.1	-	Npp.01D012080.1
Npp.01A019880.1	Npp.01A019880.1|Npp.01A024960.1|Npp.01A024950.1	Npp.01B025000.1|Npp.01B048570.1	Npp.01C042370.1|Npp.01C042560.1	Npp.01D012070.1
Npp.01A019890.1	Npp.01A019890.1	Npp.01B024990.1	-	-
Npp.01A019910.1	Npp.01A019910.1|Npp.01A024940.1	Npp.01B024980.1|Npp.07B015610.1	-	Npp.01D012060.1
Npp.01A019930.1	Npp.01A019930.1	Npp.05B001480.1	Npp.01C015840.1	Npp.01D007980.1|Npp.01D002400.1
Npp.01A019940.1	Npp.01A019940.1	-	Npp.01C015830.1	Npp.01D007970.1|Npp.01D002390.1
Npp.01A019950.1	Npp.01A019950.1	-	Npp.01C015820.1	Npp.01D007960.1|Npp.01D002380.1
Npp.01A019960.1	Npp.01A019960.1	-	Npp.01C015810.1	Npp.01D002370.1
Npp.01A019970.1	Npp.01A019970.1	-	Npp.01C015800.1	Npp.01D007950.1|Npp.01D002360.1
Npp.01A019980.1	Npp.01A019980.1	-	Npp.01C015790.1	Npp.01D007930.1|Npp.01D002340.1|Npp.01D031760.1|Npp.01D032050.1
Npp.01A019990.1	Npp.01A019990.1	-	-	Npp.01D002330.1
Npp.01A020000.1	Npp.01A020000.1	-	Npp.01C015780.1	Npp.01D007910.1|Npp.01D002320.1
Npp.01A020010.1	Npp.01A020010.1	-	Npp.01C015770.1	Npp.01D007900.1|Npp.01D002310.1
Npp.01A020020.1	Npp.01A020020.1	-	Npp.01C015760.1	Npp.01D007890.1|Npp.01D002300.1
Npp.01A020030.1	Npp.01A020030.1|Npp.01A025270.1	-	Npp.01C015750.1	Npp.01D007880.1|Npp.01D002290.1
Npp.01A020040.1	Npp.01A020040.1	-	Npp.01C015740.1	Npp.01D007870.1|Npp.01D002280.1
Npp.01A020050.1	Npp.01A020050.1	-	Npp.01C015730.1	Npp.01D007860.1|Npp.01D002270.1
Npp.01A020060.1	Npp.01A020060.1	-	Npp.01C015720.1	Npp.01D007850.1|Npp.01D002260.1
Npp.01A020070.1	Npp.01A020070.1|Npp.01A020100.1	-	Npp.01C015710.1|Npp.01C015700.1	Npp.01D002240.1|Npp.01D002250.1|Npp.01D007840.1
Npp.01A020080.1	Npp.01A020080.1	-	Npp.07C006040.1	-
Npp.01A020090.1	Npp.01A020090.1	-	Npp.01C005450.1|Npp.01C020910.1	-
Npp.01A020110.1	Npp.01A020110.1	-	Npp.01C015690.1|Npp.01C015680.1	Npp.01D007830.1|Npp.01D002230.1|Npp.04D021940.1
Npp.01A020120.1	Npp.01A020120.1	-	Npp.01C015670.1	Npp.01D007820.1|Npp.01D002210.1|Npp.01D002220.1
Npp.01A020130.1	Npp.01A020130.1	-	Npp.01C015640.1	Npp.01D007780.1|Npp.01D002180.1|Npp.01D002420.1
Npp.01A020140.1	Npp.01A020140.1	Npp.01B026360.1	-	-
Npp.01A020150.1	Npp.01A020150.1	-	Npp.01C015650.1	Npp.01D002190.1|Npp.01D007800.1
Npp.01A020160.1	Npp.01A020160.1	Npp.01B029440.1	Npp.01C015630.1	Npp.01D007760.1
Npp.01A020170.1	Npp.01A020170.1	Npp.01B029450.1	Npp.01C015620.1	Npp.01D007750.1
Npp.01A020180.1	Npp.01A020180.1	Npp.01B029460.1	Npp.01C015610.1	Npp.01D007740.1
Npp.01A020190.1	Npp.01A020190.1	Npp.01B029480.1	Npp.01C015590.1	Npp.01D007730.1
Npp.01A020200.1	Npp.01A020200.1	Npp.01B029490.1	Npp.01C015580.1	Npp.01D007720.1
Npp.01A020210.1	Npp.01A020210.1	Npp.01B029500.1	-	-
Npp.01A020220.1	Npp.01A020220.1	Npp.01B029520.1	-	Npp.01D007710.1
Npp.01A020230.1	Npp.01A020230.1	Npp.01B029530.1	Npp.01C015570.1	Npp.01D007700.1
Npp.01A020270.1	Npp.01A020270.1	Npp.01B014120.1	Npp.01C015060.1	-
Npp.01A020330.1	Npp.01A020330.1	Npp.01B014490.1	-	-
Npp.01A020400.1	Npp.01A020400.1	-	Npp.01C015180.1	Npp.01D007290.1
Npp.01A020440.1	Npp.01A020440.1	-	Npp.01C015230.1	Npp.01D007330.1
Npp.01A020470.1	Npp.01A020470.1	-	-	-
Npp.01A020480.1	Npp.01A020480.1	Npp.01B029120.1	Npp.01C015250.1	Npp.01D007380.1
Npp.01A020490.1	Npp.01A020490.1	-	-	Npp.01D007360.1|Npp.01D007370.1
Npp.01A020500.1	Npp.01A020500.1	Npp.01B029140.1|Npp.03B011330.1	Npp.01C015260.1	Npp.01D007400.1
Npp.01A020510.1	Npp.01A020510.1	Npp.01B029150.1	Npp.01C015270.1	Npp.01D007410.1
Npp.01A020520.1	Npp.01A020520.1	Npp.01B029160.1	Npp.01C015280.1	Npp.01D007420.1
Npp.01A020530.1	Npp.01A020530.1	Npp.01B029170.1	Npp.01C015310.1	Npp.01D007430.1
Npp.01A020540.1	Npp.01A020540.1|Npp.09A023300.1	Npp.01B029180.1	Npp.01C015340.1	Npp.01D007440.1
Npp.01A020550.1	Npp.01A020550.1|Npp.01A020560.1|Npp.09A023330.1	Npp.01B029200.1	Npp.01C015360.1	Npp.01D007450.1|Npp.07D012330.1
Npp.01A020570.1	Npp.01A020570.1	-	Npp.01C026360.1	-
Npp.01A020580.1	Npp.01A020580.1|Npp.08A002660.1	Npp.01B029210.1	Npp.01C015380.1	Npp.01D007460.1
Npp.01A020590.1	Npp.01A020590.1	Npp.01B029220.1	Npp.01C015390.1	Npp.01D007470.1
Npp.01A020600.1	Npp.01A020600.1	Npp.01B029230.1	Npp.01C015400.1	Npp.01D007480.1
Npp.01A020610.1	Npp.01A020610.1	Npp.01B029240.1	Npp.01C015410.1	Npp.01D007490.1
Npp.01A020620.1	Npp.01A020620.1	Npp.01B029250.1	Npp.01C015420.1	Npp.01D007500.1
Npp.01A020630.1	Npp.01A020630.1	-	-	-
Npp.01A020640.1	Npp.01A020640.1	Npp.01B029270.1	Npp.01C015430.1	Npp.01D007510.1
Npp.01A020650.1	Npp.01A020650.1	Npp.01B029280.1	Npp.01C015450.1	Npp.01D007520.1|Npp.02D038510.1
Npp.01A020660.1	Npp.01A020660.1	Npp.01B029290.1	Npp.01C015460.1	Npp.01D007530.1
Npp.01A020670.1	Npp.01A020670.1	Npp.01B029310.1	Npp.01C015480.1	Npp.01D007550.1
Npp.01A020680.1	Npp.01A020680.1	Npp.01B029320.1	Npp.01C015490.1	Npp.01D007560.1
Npp.01A020690.1	Npp.01A020690.1	Npp.01B029330.1	Npp.01C015500.1	Npp.01D007570.1
Npp.01A020700.1	Npp.01A020700.1	-	Npp.01C015510.1	Npp.01D007580.1
Npp.01A020710.1	Npp.01A020710.1	Npp.01B029340.1	-	Npp.01D007590.1
Npp.01A020720.1	Npp.01A020720.1	Npp.01B029350.1	-	Npp.01D007630.1
Npp.01A020730.1	Npp.01A020730.1	Npp.01B029360.1	-	Npp.01D007640.1
Npp.01A020740.1	Npp.01A020740.1	Npp.01B029380.1|Npp.01B029370.1	-	Npp.01D007650.1
Npp.01A020750.1	Npp.01A020750.1	Npp.01B029390.1	-	Npp.01D007660.1
Npp.01A020760.1	Npp.01A020760.1|Npp.01A000050.1	Npp.01B029400.1	Npp.01C015550.1|Npp.10C024550.1	Npp.01D007670.1
Npp.01A020770.1	Npp.01A020770.1	Npp.01B029410.1	Npp.01C015540.1	Npp.01D007680.1
Npp.01A020780.1	Npp.01A020780.1	Npp.01B029430.1	Npp.01C015520.1|Npp.01C015530.1	-
Npp.01A020790.1	Npp.01A020790.1	Npp.01B029420.1	Npp.01C015560.1	Npp.01D007690.1
Npp.01A020800.1	Npp.01A020800.1	-	Npp.01C009370.1	-
Npp.01A020810.1	Npp.01A020810.1	-	-	Npp.01D008000.1|Npp.01D002440.1
Npp.01A020820.1	Npp.01A020820.1	-	Npp.01C015860.1	Npp.01D002450.1|Npp.01D008010.1
Npp.01A020830.1	Npp.01A020830.1	-	-	Npp.01D008020.1|Npp.01D002460.1
Npp.01A020840.1	Npp.01A020840.1	-	Npp.01C015870.1	Npp.01D008030.1|Npp.01D002470.1
Npp.01A020850.1	Npp.01A020850.1	Npp.05B010420.1	Npp.01C015880.1|Npp.08C004160.1	Npp.01D008040.1|Npp.01D002480.1
Npp.01A020860.1	Npp.01A020860.1	-	Npp.01C015900.1|Npp.01C015890.1	Npp.01D008050.1|Npp.01D002490.1|Npp.08D019270.1
Npp.01A020870.1	Npp.01A020870.1	-	-	Npp.01D008060.1|Npp.01D002500.1
Npp.01A020880.1	Npp.01A020880.1	Npp.10B022900.1	Npp.01C015910.1|Npp.01C042260.1	Npp.01D008070.1|Npp.01D002510.1
Npp.01A020890.1	Npp.01A020890.1|Npp.01A021310.1	Npp.01B020450.1	Npp.01C015960.1	Npp.01D008110.1|Npp.01D008250.1|Npp.01D002520.1
Npp.01A020900.1	Npp.01A020900.1|Npp.01A021170.1|Npp.01A040570.1|Npp.01A020920.1	-	Npp.01C015930.1	Npp.01D008120.1
Npp.01A020910.1	Npp.01A020910.1	-	-	Npp.01D008130.1|Npp.01D002530.1
Npp.01A020950.1	Npp.01A020950.1|Npp.01A021350.1	-	-	-
Npp.01A020960.1	Npp.01A020960.1	-	-	-
Npp.01A020980.1	Npp.01A020980.1|Npp.01A021340.1	-	-	-
Npp.01A020990.1	Npp.01A020990.1|Npp.01A029020.1	-	-	Npp.01D016500.1
Npp.01A021000.1	Npp.01A021000.1|Npp.01A029030.1	-	-	Npp.01D016490.1
Npp.01A021010.1	Npp.01A021010.1|Npp.01A029040.1	-	Npp.01C025320.1	Npp.01D016480.1
Npp.01A021020.1	Npp.01A021020.1	-	Npp.01C025310.1	Npp.01D016470.1|Npp.01D016390.1
Npp.01A021030.1	Npp.01A021030.1	-	Npp.01C025300.1	Npp.01D016460.1|Npp.01D016380.1
Npp.01A021040.1	Npp.01A021040.1	-	Npp.01C025290.1	Npp.01D016450.1|Npp.01D016370.1
Npp.01A021050.1	Npp.01A021050.1	-	-	Npp.01D016360.1
Npp.01A021060.1	Npp.01A021060.1	-	Npp.01C025280.1	Npp.01D016440.1
Npp.01A021070.1	Npp.01A021070.1	-	Npp.01C025270.1	Npp.01D016350.1|Npp.01D016430.1
Npp.01A021080.1	Npp.01A021080.1	Npp.01B018710.1	-	Npp.01D033120.1
Npp.01A021090.1	Npp.01A021090.1	-	Npp.01C025260.1	Npp.01D016410.1|Npp.01D016340.1
Npp.01A021110.1	Npp.01A021110.1|Npp.01A021100.1	-	Npp.01C025250.1	Npp.01D016330.1
Npp.01A021120.1	Npp.01A021120.1|Npp.01A028780.1	Npp.01B054080.1	Npp.01C025230.1	Npp.01D016310.1
Npp.01A021130.1	Npp.01A021130.1|Npp.01A028790.1	-	Npp.01C025220.1	Npp.01D016300.1
Npp.01A021140.1	Npp.01A021140.1|Npp.01A028800.1	-	Npp.01C025210.1	Npp.01D016290.1
Npp.01A021150.1	Npp.01A021150.1|Npp.01A028820.1|Npp.07A021420.1	-	Npp.07C011000.1	Npp.01D016270.1
Npp.01A021160.1	Npp.01A021160.1	-	-	-
Npp.01A021180.1	Npp.01A021180.1|Npp.01A020930.1	-	-	-
Npp.01A021190.1	Npp.01A021190.1	Npp.02B003690.1	-	-
Npp.01A021210.1	Npp.01A021210.1|Npp.01A021390.1|Npp.02A008720.1	Npp.01B020550.1	Npp.01C016060.1	Npp.01D008340.1
Npp.01A021220.1	Npp.01A021220.1	Npp.01B020490.1	Npp.01C024370.1	Npp.01D005170.1|Npp.01D031930.1
Npp.01A021230.1	Npp.01A021230.1	-	-	-
Npp.01A021250.1	Npp.01A021250.1	-	-	Npp.01D000450.1
Npp.01A021260.1	Npp.01A021260.1	-	Npp.01C016050.1	Npp.01D008300.1
Npp.01A021270.1	Npp.01A021270.1	-	Npp.01C016040.1	Npp.01D008290.1
Npp.01A021280.1	Npp.01A021280.1	Npp.01B020480.1	Npp.01C016030.1	Npp.01D008280.1
Npp.01A021290.1	Npp.01A021290.1	Npp.01B020470.1	Npp.01C016020.1	Npp.01D008270.1|Npp.01D026310.1
Npp.01A021300.1	Npp.01A021300.1	Npp.01B020460.1	Npp.01C016010.1	Npp.01D008260.1
Npp.01A021320.1	Npp.01A021320.1	Npp.01B020440.1	Npp.01C015950.1	Npp.01D008150.1
Npp.01A021330.1	Npp.01A021330.1	-	Npp.01C015940.1	-
Npp.01A021360.1	Npp.01A021360.1	Npp.01B020520.1	-	Npp.01D008310.1
Npp.01A021370.1	Npp.01A021370.1	Npp.01B020530.1|Npp.01B020500.1|Npp.06B023770.1	-	Npp.01D008320.1
Npp.01A021380.1	Npp.01A021380.1	Npp.01B020540.1	-	Npp.01D008330.1
Npp.01A021400.1	Npp.01A021400.1	Npp.01B020560.1	Npp.01C016070.1	Npp.01D008350.1
Npp.01A021410.1	Npp.01A021410.1	Npp.01B039780.1	Npp.01C043070.1	-
Npp.01A021420.1	Npp.01A021420.1	Npp.01B039770.1	Npp.01C043080.1|Npp.01C018690.1	-
Npp.01A021430.1	Npp.01A021430.1|Npp.01A028330.1|Npp.01A028340.1	-	Npp.01C043090.1	Npp.01D004290.1
Npp.01A021440.1	Npp.01A021440.1|Npp.10A019780.1	Npp.01B020570.1	Npp.01C016080.1	Npp.01D008360.1
Npp.01A021450.1	Npp.01A021450.1	-	-	Npp.01D019620.1
Npp.01A021460.1	Npp.01A021460.1	Npp.01B020580.1	Npp.01C016090.1	Npp.01D008370.1
Npp.01A021470.1	Npp.01A021470.1	Npp.01B020590.1	Npp.01C016100.1	Npp.01D008380.1
Npp.01A021480.1	Npp.01A021480.1	Npp.01B020600.1|Npp.04B013880.1	Npp.01C016120.1	Npp.01D008400.1
Npp.01A021490.1	Npp.01A021490.1	Npp.01B020620.1|Npp.01B020610.1	Npp.01C016130.1|Npp.01C000110.1	Npp.01D008410.1
Npp.01A021500.1	Npp.01A021500.1	-	-	Npp.01D008420.1
Npp.01A021510.1	Npp.01A021510.1	Npp.01B020630.1	Npp.01C016140.1	Npp.01D008430.1
Npp.01A021520.1	Npp.01A021520.1	Npp.01B020640.1|Npp.04B020560.1	Npp.01C016150.1	Npp.01D008440.1
Npp.01A021530.1	Npp.01A021530.1|Npp.01A003440.1	Npp.01B037720.1|Npp.01B026620.1	-	Npp.01D014800.1
Npp.01A021540.1	Npp.01A021540.1|Npp.04A038300.1	Npp.01B020650.1	Npp.01C016170.1	Npp.01D008450.1|Npp.01D027170.1
Npp.01A021550.1	Npp.01A021550.1	Npp.01B020660.1	Npp.01C016180.1	Npp.01D008460.1
Npp.01A021560.1	Npp.01A021560.1	Npp.01B020670.1|Npp.09B013520.1	Npp.01C016190.1	Npp.01D008470.1|Npp.01D019770.1
Npp.01A021570.1	Npp.01A021570.1	-	-	-
Npp.01A021580.1	Npp.01A021580.1	Npp.01B020680.1	-	Npp.01D008480.1
Npp.01A021600.1	Npp.01A021600.1|Npp.01A021590.1	Npp.01B020690.1	Npp.01C016200.1	Npp.01D008490.1
Npp.01A021610.1	Npp.01A021610.1	Npp.01B020720.1	Npp.01C016210.1	-
Npp.01A021620.1	Npp.01A021620.1	Npp.01B020730.1|Npp.01B021000.1	Npp.01C016220.1	-
Npp.01A021630.1	Npp.01A021630.1	Npp.01B020740.1|Npp.01B021010.1	Npp.01C016230.1	-
Npp.01A021640.1	Npp.01A021640.1	Npp.01B020750.1|Npp.01B021020.1|Npp.01B021030.1	Npp.01C016240.1	-
Npp.01A021650.1	Npp.01A021650.1	Npp.01B020760.1|Npp.01B021040.1	Npp.01C016250.1	-
Npp.01A021660.1	Npp.01A021660.1	Npp.01B020770.1|Npp.01B021050.1	Npp.01C016260.1	-
Npp.01A021670.1	Npp.01A021670.1	-	Npp.01C016270.1	-
Npp.01A021680.1	Npp.01A021680.1	Npp.01B021060.1	Npp.01C016280.1	-
Npp.01A021690.1	Npp.01A021690.1|Npp.01A021700.1	Npp.01B020800.1|Npp.01B021080.1	Npp.01C016290.1	-
Npp.01A021710.1	Npp.01A021710.1	Npp.01B021090.1|Npp.01B021100.1	Npp.01C016310.1	-
Npp.01A021720.1	Npp.01A021720.1	-	Npp.01C016320.1	-
Npp.01A021730.1	Npp.01A021730.1	Npp.01B020780.1|Npp.01B021070.1|Npp.01B020790.1|Npp.01B020810.1	Npp.01C016300.1	-
Npp.01A021740.1	Npp.01A021740.1	Npp.01B020820.1|Npp.01B021120.1	Npp.01C016330.1	-
Npp.01A021750.1	Npp.01A021750.1	Npp.01B020830.1|Npp.01B021130.1	Npp.01C016340.1	-
Npp.01A021760.1	Npp.01A021760.1	Npp.01B020840.1|Npp.01B020860.1|Npp.01B021140.1	-	-
Npp.01A021770.1	Npp.01A021770.1	-	-	Npp.01D009080.1
Npp.01A021780.1	Npp.01A021780.1	Npp.01B020870.1|Npp.01B021150.1|Npp.04B012970.1	Npp.01C016350.1	-
Npp.01A021800.1	Npp.01A021800.1	-	Npp.01C016360.1	-
Npp.01A021810.1	Npp.01A021810.1	Npp.01B020880.1|Npp.01B021160.1	Npp.01C016380.1	-
Npp.01A021820.1	Npp.01A021820.1	Npp.01B020890.1	-	-
Npp.01A021830.1	Npp.01A021830.1	Npp.01B020900.1|Npp.01B021170.1|Npp.01B020910.1|Npp.01B021180.1	Npp.01C016390.1	-
Npp.01A021870.1	Npp.01A021870.1|Npp.01A021860.1	-	Npp.01C016430.1|Npp.06C001190.1	-
Npp.01A021990.1	Npp.01A021990.1	-	Npp.01C027300.1	-
Npp.01A022040.1	Npp.01A022040.1	Npp.01B021360.1|Npp.01B021350.1	-	Npp.01D008560.1
Npp.01A022060.1	Npp.01A022060.1|Npp.05A009850.1	Npp.01B021370.1	-	Npp.01D008710.1
Npp.01A022070.1	Npp.01A022070.1|Npp.05A009830.1	Npp.01B021380.1	-	Npp.01D008730.1
Npp.01A022080.1	Npp.01A022080.1	Npp.01B021400.1	-	Npp.01D008590.1|Npp.01D008740.1|Npp.01D008750.1
Npp.01A022090.1	Npp.01A022090.1	Npp.01B021390.1	-	Npp.01D008570.1|Npp.01D008580.1
Npp.01A022100.1	Npp.01A022100.1	Npp.01B021410.1	-	Npp.01D008760.1
Npp.01A022110.1	Npp.01A022110.1	Npp.01B021420.1	-	Npp.01D008770.1
Npp.01A022120.1	Npp.01A022120.1	-	Npp.08C014140.1	-
Npp.01A022130.1	Npp.01A022130.1	-	Npp.08C014150.1	-
Npp.01A022170.1	Npp.01A022170.1|Npp.01A022180.1	-	Npp.01C005470.1|Npp.01C033720.1	-
Npp.01A022210.1	Npp.01A022210.1|Npp.01A048100.1	-	-	-
Npp.01A022220.1	Npp.01A022220.1	Npp.01B021450.1|Npp.01B021470.1|Npp.01B021460.1|Npp.01B021430.1	-	Npp.01D008630.1|Npp.01D008780.1
Npp.01A022230.1	Npp.01A022230.1	-	Npp.01C016870.1	Npp.01D008640.1|Npp.01D008650.1
Npp.01A022240.1	Npp.01A022240.1	Npp.06B023560.1	Npp.01C016880.1	Npp.01D008660.1|Npp.01D008790.1
Npp.01A022250.1	Npp.01A022250.1	-	Npp.01C016890.1	Npp.01D008670.1
Npp.01A022260.1	Npp.01A022260.1	-	Npp.01C016900.1	Npp.01D008680.1|Npp.01D008800.1
Npp.01A022270.1	Npp.01A022270.1	-	Npp.01C016910.1	-
Npp.01A022280.1	Npp.01A022280.1	-	Npp.01C016930.1	Npp.01D008820.1
Npp.01A022290.1	Npp.01A022290.1	-	Npp.01C017090.1	Npp.01D008980.1
Npp.01A022300.1	Npp.01A022300.1	Npp.01B021480.1	Npp.01C016940.1|Npp.01C016920.1	Npp.01D008830.1
Npp.01A022310.1	Npp.01A022310.1	Npp.01B021490.1	Npp.01C016950.1	-
Npp.01A022320.1	Npp.01A022320.1	Npp.01B021500.1	Npp.01C016960.1	Npp.01D008840.1
Npp.01A022330.1	Npp.01A022330.1	Npp.01B021510.1	Npp.01C016970.1	Npp.01D008850.1
Npp.01A022340.1	Npp.01A022340.1	Npp.01B021530.1	Npp.01C016990.1	Npp.01D008870.1
Npp.01A022350.1	Npp.01A022350.1	Npp.01B021540.1	Npp.01C017000.1	Npp.01D008880.1
Npp.01A022360.1	Npp.01A022360.1	Npp.01B021550.1	Npp.01C017010.1	Npp.01D008890.1
Npp.01A022370.1	Npp.01A022370.1|Npp.08A008010.1	-	Npp.01C017020.1	Npp.01D008910.1
Npp.01A022380.1	Npp.01A022380.1|Npp.08A008000.1	-	Npp.01C017030.1	Npp.01D008920.1
Npp.01A022390.1	Npp.01A022390.1|Npp.08A007990.1	-	Npp.01C017040.1	Npp.01D008930.1
Npp.01A022400.1	Npp.01A022400.1|Npp.08A007980.1	-	Npp.01C017050.1	Npp.01D008940.1
Npp.01A022410.1	Npp.01A022410.1	-	Npp.01C017060.1	Npp.01D008950.1
Npp.01A022420.1	Npp.01A022420.1	-	Npp.01C017070.1	Npp.01D008960.1
Npp.01A022430.1	Npp.01A022430.1|Npp.08A007950.1	-	Npp.01C017080.1	Npp.01D008970.1
Npp.01A022440.1	Npp.01A022440.1	Npp.01B015750.1	-	-
Npp.01A022450.1	Npp.01A022450.1|Npp.08A007930.1	-	Npp.01C017110.1	Npp.01D009000.1
Npp.01A022460.1	Npp.01A022460.1|Npp.08A007920.1	-	Npp.01C017120.1	Npp.01D009010.1|Npp.10D015270.1
Npp.01A022470.1	Npp.01A022470.1|Npp.01A022490.1	Npp.01B021560.1|Npp.01B021670.1|Npp.01B021650.1	Npp.01C017400.1|Npp.01C017360.1	Npp.01D009380.1|Npp.01D009360.1
Npp.01A022500.1	Npp.01A022500.1	Npp.01B021640.1	Npp.01C017350.1	-
Npp.01A022510.1	Npp.01A022510.1	Npp.01B021630.1	Npp.01C017340.1	Npp.01D009350.1|Npp.01D009340.1|Npp.01D008200.1
Npp.01A022520.1	Npp.01A022520.1	Npp.01B021620.1	Npp.01C017330.1	Npp.01D009330.1
Npp.01A022530.1	Npp.01A022530.1	Npp.01B021610.1	Npp.01C017320.1	Npp.01D009320.1
Npp.01A022540.1	Npp.01A022540.1	Npp.01B021680.1|Npp.01B021700.1	Npp.01C017410.1	Npp.01D009390.1
Npp.01A022550.1	Npp.01A022550.1|Npp.01A022480.1	Npp.01B021690.1	Npp.01C017420.1	-
Npp.01A022560.1	Npp.01A022560.1	Npp.01B021720.1	Npp.01C017430.1|Npp.01C017440.1|Npp.01C017370.1	Npp.01D009400.1
Npp.01A022570.1	Npp.01A022570.1	Npp.01B021730.1	Npp.01C017450.1	Npp.01D009410.1
Npp.01A022580.1	Npp.01A022580.1	Npp.01B021750.1	Npp.01C017490.1	Npp.01D009440.1
Npp.01A022600.1	Npp.01A022600.1|Npp.01A007860.1	Npp.01B021760.1	Npp.01C017530.1	-
Npp.01A022610.1	Npp.01A022610.1	Npp.01B021770.1	Npp.01C017550.1	Npp.01D009510.1
Npp.01A022620.1	Npp.01A022620.1	Npp.01B021780.1	Npp.01C017570.1	Npp.01D009520.1
Npp.01A022630.1	Npp.01A022630.1	Npp.01B021810.1|Npp.01B021800.1	Npp.01C017580.1|Npp.01C017590.1	Npp.01D009530.1
Npp.01A022640.1	Npp.01A022640.1	Npp.01B021820.1	Npp.01C017600.1	Npp.01D009540.1
Npp.01A022650.1	Npp.01A022650.1	Npp.01B022110.1	Npp.01C017800.1	Npp.01D009710.1
Npp.01A022660.1	Npp.01A022660.1	Npp.01B022100.1	Npp.01C017790.1	Npp.01D009700.1
Npp.01A022670.1	Npp.01A022670.1	-	Npp.01C017890.1|Npp.01C017930.1	-
Npp.01A022680.1	Npp.01A022680.1	Npp.01B022220.1	Npp.01C017870.1	Npp.01D009790.1
Npp.01A022690.1	Npp.01A022690.1	Npp.01B022210.1	Npp.01C017860.1	Npp.01D009780.1
Npp.01A022700.1	Npp.01A022700.1	-	Npp.01C017940.1	Npp.01D009820.1
Npp.01A022710.1	Npp.01A022710.1	-	Npp.01C017950.1|Npp.01C017900.1	Npp.01D009830.1
Npp.01A022720.1	Npp.01A022720.1	-	Npp.01C017910.1|Npp.01C017960.1	Npp.01D009840.1
Npp.01A022730.1	Npp.01A022730.1	Npp.01B022260.1	Npp.01C017980.1	Npp.01D009860.1
Npp.01A022740.1	Npp.01A022740.1	Npp.01B022270.1	Npp.01C017990.1	Npp.01D009870.1
Npp.01A022750.1	Npp.01A022750.1	Npp.01B022280.1	Npp.01C018000.1	Npp.01D009880.1
Npp.01A022760.1	Npp.01A022760.1	Npp.01B022290.1	Npp.01C018010.1	Npp.01D009890.1
Npp.01A022770.1	Npp.01A022770.1	Npp.01B022300.1	Npp.01C018020.1	Npp.01D009900.1
Npp.01A022780.1	Npp.01A022780.1	Npp.01B022310.1	Npp.01C018040.1	Npp.01D009930.1
Npp.01A022790.1	Npp.01A022790.1	Npp.01B022330.1	Npp.01C018050.1|Npp.01C018030.1	Npp.01D009940.1|Npp.01D009920.1
Npp.01A022800.1	Npp.01A022800.1|Npp.01A022860.1	Npp.01B022340.1	-	Npp.01D009950.1
Npp.01A022810.1	Npp.01A022810.1|Npp.01A022870.1	Npp.01B022350.1	-	Npp.01D009960.1
Npp.01A022830.1	Npp.01A022830.1|Npp.01A022880.1|Npp.01A022820.1|Npp.01A022890.1|Npp.08A000310.1	Npp.01B022360.1	Npp.01C018060.1	Npp.01D009970.1
Npp.01A022840.1	Npp.01A022840.1	Npp.01B022370.1	Npp.01C018070.1	-
Npp.01A022850.1	Npp.01A022850.1|Npp.01A022910.1	Npp.01B022380.1	Npp.01C018080.1	-
Npp.01A022900.1	Npp.01A022900.1	-	-	Npp.01D029900.1
Npp.01A022920.1	Npp.01A022920.1	-	Npp.01C027210.1|Npp.01C033180.1	Npp.01D002690.1
Npp.01A022930.1	Npp.01A022930.1	Npp.01B047730.1	Npp.09C002440.1	-
Npp.01A022950.1	Npp.01A022950.1	-	Npp.01C018100.1	-
Npp.01A022960.1	Npp.01A022960.1	Npp.01B022400.1|Npp.01B022420.1	-	Npp.01D009980.1
Npp.01A022970.1	Npp.01A022970.1	Npp.01B022410.1	Npp.01C018110.1	Npp.01D009990.1|Npp.01D037940.1|Npp.05D018140.1
Npp.01A022990.1	Npp.01A022990.1|Npp.01A022980.1	Npp.01B022430.1	Npp.01C018120.1|Npp.03C032760.1	Npp.01D010000.1
Npp.01A023000.1	Npp.01A023000.1	Npp.01B022440.1	Npp.01C018130.1	Npp.01D010010.1
Npp.01A023010.1	Npp.01A023010.1	Npp.01B022450.1	Npp.01C018150.1	Npp.01D010030.1|Npp.06D011970.1
Npp.01A023020.1	Npp.01A023020.1	Npp.01B022460.1	Npp.01C018160.1	Npp.01D010040.1
Npp.01A023030.1	Npp.01A023030.1	Npp.01B022470.1	Npp.01C018180.1	Npp.01D010050.1
Npp.01A023040.1	Npp.01A023040.1|Npp.09A023400.1	Npp.01B022480.1	Npp.01C018190.1	Npp.01D010060.1
Npp.01A023050.1	Npp.01A023050.1|Npp.01A047100.1	Npp.01B022490.1|Npp.01B050030.1|Npp.01B050290.1	Npp.01C018200.1	Npp.01D010070.1|Npp.01D037750.1
Npp.01A023060.1	Npp.01A023060.1|Npp.01A047110.1	Npp.01B022500.1|Npp.01B050020.1|Npp.01B050280.1	Npp.01C018210.1	Npp.01D010080.1|Npp.01D037740.1
Npp.01A023070.1	Npp.01A023070.1|Npp.04A028180.1	Npp.01B022510.1	-	Npp.01D010090.1
Npp.01A023080.1	Npp.01A023080.1	Npp.01B022520.1	-	Npp.01D010100.1
Npp.01A023090.1	Npp.01A023090.1	Npp.01B022530.1	-	Npp.02D007060.1
Npp.01A023110.1	Npp.01A023110.1	-	-	-
Npp.01A023120.1	Npp.01A023120.1	Npp.01B022580.1	-	Npp.01D010150.1
Npp.01A023130.1	Npp.01A023130.1	Npp.01B022600.1	Npp.01C000420.1	Npp.01D010170.1
Npp.01A023140.1	Npp.01A023140.1	Npp.01B022610.1	Npp.01C000410.1	Npp.01D010180.1
Npp.01A023150.1	Npp.01A023150.1	Npp.01B022620.1|Npp.01B049860.1	Npp.01C000400.1|Npp.01C044170.1	Npp.01D010190.1|Npp.01D037540.1|Npp.07D010950.1
Npp.01A023160.1	Npp.01A023160.1	Npp.01B022640.1	Npp.01C000390.1	Npp.01D010200.1
Npp.01A023170.1	Npp.01A023170.1	Npp.01B022650.1|Npp.01B049780.1	Npp.01C000370.1|Npp.01C044080.1	Npp.01D010230.1|Npp.01D037350.1|Npp.01D037450.1
Npp.01A023180.1	Npp.01A023180.1	Npp.01B022660.1	Npp.01C000360.1	Npp.01D010240.1
Npp.01A023190.1	Npp.01A023190.1	Npp.01B022670.1	Npp.01C000350.1	Npp.01D010250.1
Npp.01A023200.1	Npp.01A023200.1	-	Npp.01C018220.1|Npp.01C000340.1	Npp.01D010260.1
Npp.01A023210.1	Npp.01A023210.1	Npp.01B049760.1	Npp.01C018230.1|Npp.01C000320.1	Npp.01D010270.1
Npp.01A023220.1	Npp.01A023220.1	-	Npp.01C018240.1|Npp.01C000310.1	Npp.01D010280.1
Npp.01A023230.1	Npp.01A023230.1|Npp.01A006820.1	Npp.01B024900.1	Npp.01C018250.1|Npp.01C000300.1	Npp.01D010290.1|Npp.10D023210.1
Npp.01A023240.1	Npp.01A023240.1	-	Npp.01C020070.1	-
Npp.01A023250.1	Npp.01A023250.1	-	Npp.01C018280.1|Npp.01C000280.1	Npp.01D010320.1
Npp.01A023260.1	Npp.01A023260.1|Npp.01A009540.1	Npp.05B000900.1	Npp.01C000270.1	Npp.01D010330.1
Npp.01A023270.1	Npp.01A023270.1	-	Npp.01C018290.1|Npp.01C000260.1	Npp.01D010340.1
Npp.01A023280.1	Npp.01A023280.1	Npp.01B022770.1	Npp.01C018300.1	Npp.01D010520.1
Npp.01A023290.1	Npp.01A023290.1	Npp.01B022780.1	Npp.01C018310.1	Npp.01D010510.1
Npp.01A023300.1	Npp.01A023300.1	Npp.01B022790.1	Npp.01C018320.1	Npp.01D010500.1
Npp.01A023310.1	Npp.01A023310.1	Npp.01B022810.1	Npp.01C018340.1|Npp.09C017230.1	Npp.01D010490.1
Npp.01A023320.1	Npp.01A023320.1	Npp.01B022820.1	Npp.01C018350.1	Npp.01D010480.1
Npp.01A023330.1	Npp.01A023330.1|Npp.01A046930.1	Npp.01B022830.1|Npp.01B049630.1|Npp.01B049510.1	Npp.01C018360.1	Npp.01D010460.1|Npp.01D037180.1
Npp.01A023340.1	Npp.01A023340.1	Npp.01B022840.1	Npp.01C018370.1	Npp.01D010450.1
Npp.01A023350.1	Npp.01A023350.1	Npp.01B022850.1|Npp.01B049500.1|Npp.01B049620.1	Npp.01C018380.1|Npp.01C043950.1	Npp.01D010440.1|Npp.01D037170.1
Npp.01A023360.1	Npp.01A023360.1	Npp.01B022860.1	Npp.01C018390.1	Npp.01D010430.1
Npp.01A023370.1	Npp.01A023370.1	Npp.01B022870.1	Npp.01C018400.1	Npp.01D010420.1
Npp.01A023380.1	Npp.01A023380.1	-	Npp.01C018410.1	Npp.01D010410.1
Npp.01A023390.1	Npp.01A023390.1	Npp.01B022890.1	Npp.01C018420.1|Npp.01C018430.1	Npp.01D010400.1
Npp.01A023400.1	Npp.01A023400.1|Npp.01A023420.1|Npp.01A023430.1|Npp.01A023440.1|Npp.01A023450.1	Npp.01B000010.1|Npp.01B000020.1|Npp.01B000040.1|Npp.01B022700.1|Npp.01B022720.1|Npp.01B022730.1|Npp.01B022750.1|Npp.01B022760.1|Npp.01B022680.1|Npp.01B022710.1|Npp.01B022690.1	Npp.01C018430.3|Npp.01C018440.1	Npp.01D010380.1
Npp.01A023410.1	Npp.01A023410.1	Npp.01B000030.1	-	-
Npp.01A023460.1	Npp.01A023460.1	Npp.01B022740.1|Npp.01B022880.1	Npp.01C018140.1|Npp.01C018430.2	Npp.01D010390.1
Npp.01A023470.1	Npp.01A023470.1	-	-	Npp.01D010370.1
Npp.01A023480.1	Npp.01A023480.1|Npp.01A023500.1	-	Npp.01C018460.1	Npp.01D010360.1
Npp.01A023490.1	Npp.01A023490.1	Npp.01B031280.1	Npp.01C025620.1	-
Npp.01A023510.1	Npp.01A023510.1	Npp.01B002180.1	-	-
Npp.01A023520.1	Npp.01A023520.1|Npp.01A023530.1	Npp.01B022900.1	Npp.01C027420.1	-
Npp.01A023540.1	Npp.01A023540.1|Npp.01A046840.1	Npp.01B049360.1	Npp.01C043860.1	Npp.01D037020.1
Npp.01A023550.1	Npp.01A023550.1	Npp.01B042420.1	Npp.01C036500.1	-
Npp.01A023560.1	Npp.01A023560.1	Npp.01B022920.1	Npp.03C038650.1	-
Npp.01A023570.1	Npp.01A023570.1|Npp.01A046650.1|Npp.01A046660.1	Npp.01B023070.1|Npp.01B049130.1|Npp.01B049210.1	Npp.01C018540.1|Npp.01C043710.1|Npp.01C043720.1	Npp.01D036820.1
Npp.01A023580.1	Npp.01A023580.1	Npp.01B023080.1	Npp.01C018550.1	Npp.01D036840.1
Npp.01A023590.1	Npp.01A023590.1|Npp.01A046640.1|Npp.01A046630.1|Npp.06A008820.1	Npp.01B023090.1|Npp.01B049140.1	Npp.01C018560.1|Npp.01C043700.1	Npp.01D036810.1
Npp.01A023600.1	Npp.01A023600.1	Npp.01B023100.1	Npp.01C018570.1|Npp.08C015930.1	-
Npp.01A023610.1	Npp.01A023610.1	Npp.01B023110.1	Npp.01C018580.1	-
Npp.01A023620.1	Npp.01A023620.1	Npp.01B002490.1	Npp.01C002510.1	Npp.01D013880.1
Npp.01A023630.1	Npp.01A023630.1	Npp.01B023140.1	-	-
Npp.01A023640.1	Npp.01A023640.1	Npp.01B023150.1	Npp.01C018600.1	-
Npp.01A023650.1	Npp.01A023650.1	Npp.01B023170.1	Npp.01C018620.1	-
Npp.01A023660.1	Npp.01A023660.1	Npp.01B023180.1	Npp.01C018630.1|Npp.04C029070.1	-
Npp.01A023670.1	Npp.01A023670.1	Npp.01B023190.1	Npp.01C018640.1	-
Npp.01A023680.1	Npp.01A023680.1	Npp.01B023200.1	Npp.01C018650.1	-
Npp.01A023690.1	Npp.01A023690.1	Npp.01B023210.1	Npp.01C018660.1	-
Npp.01A023700.1	Npp.01A023700.1	Npp.01B023260.1	Npp.01C018730.1|Npp.02C020890.1	-
Npp.01A023710.1	Npp.01A023710.1	Npp.01B023280.1	Npp.01C018740.1	-
Npp.01A023720.1	Npp.01A023720.1	Npp.01B023300.1	Npp.01C018760.1	-
Npp.01A023730.1	Npp.01A023730.1	Npp.01B023290.1	Npp.01C018750.1	-
Npp.01A023740.1	Npp.01A023740.1	Npp.01B023310.1	Npp.01C018770.1	-
Npp.01A023750.1	Npp.01A023750.1	Npp.01B023330.1	Npp.01C018780.1	-
Npp.01A023760.1	Npp.01A023760.1	Npp.01B023340.1	Npp.01C018790.1	-
Npp.01A023780.1	Npp.01A023780.1	Npp.01B023550.1	Npp.01C019060.1|Npp.03C038150.1	-
Npp.01A023790.1	Npp.01A023790.1	Npp.01B023560.1	Npp.01C019070.1|Npp.03C038140.1	-
Npp.01A023800.1	Npp.01A023800.1|Npp.04A028240.1	Npp.01B023570.1	Npp.01C019100.1|Npp.03C038130.1	-
Npp.01A023810.1	Npp.01A023810.1	Npp.01B023580.1	Npp.01C019110.1	-
Npp.01A023820.1	Npp.01A023820.1	Npp.01B023610.1|Npp.01B023600.1	Npp.01C019120.1	Npp.03D004350.1
Npp.01A023830.1	Npp.01A023830.1	Npp.01B023620.1	Npp.01C019130.1|Npp.02C007950.1	Npp.02D039350.1
Npp.01A023840.1	Npp.01A023840.1	Npp.01B023630.1	-	-
Npp.01A023850.1	Npp.01A023850.1	Npp.01B023640.1	Npp.01C019140.1|Npp.03C038050.1	-
Npp.01A023860.1	Npp.01A023860.1	Npp.01B023650.1	Npp.01C019150.1	-
Npp.01A023870.1	Npp.01A023870.1	Npp.01B023660.1	Npp.01C019160.1|Npp.03C038030.1	-
Npp.01A023880.1	Npp.01A023880.1	Npp.01B023680.1	Npp.01C019170.1	-
Npp.01A023890.1	Npp.01A023890.1	Npp.01B023690.1	Npp.01C019180.1	-
Npp.01A023900.1	Npp.01A023900.1	Npp.01B015490.1	-	Npp.01D013520.1
Npp.01A023910.1	Npp.01A023910.1	Npp.01B023700.1	Npp.01C019190.1	-
Npp.01A023920.1	Npp.01A023920.1	Npp.01B023710.1	-	-
Npp.01A023930.1	Npp.01A023930.1	Npp.01B033050.1	-	-
Npp.01A023940.1	Npp.01A023940.1	Npp.01B023730.1	Npp.01C019230.1	-
Npp.01A023950.1	Npp.01A023950.1	Npp.01B023740.1	Npp.01C019240.1	-
Npp.01A023960.1	Npp.01A023960.1	Npp.01B023780.1	Npp.01C019300.1|Npp.01C019290.1	-
Npp.01A023970.1	Npp.01A023970.1	Npp.01B023790.1	Npp.01C019310.1|Npp.03C037910.1	-
Npp.01A023980.1	Npp.01A023980.1|Npp.01A024080.1|Npp.01A024160.1	Npp.01B023800.1	Npp.01C019320.1|Npp.01C019410.1	Npp.01D010930.1|Npp.02D040150.1|Npp.08D012420.1
Npp.01A023990.1	Npp.01A023990.1	Npp.01B023820.1	Npp.01C019330.1	-
Npp.01A024000.1	Npp.01A024000.1	-	Npp.01C019350.1	-
Npp.01A024010.1	Npp.01A024010.1|Npp.01A024020.1	Npp.01B024230.1	Npp.01C019370.1|Npp.01C019340.1	-
Npp.01A024030.1	Npp.01A024030.1	Npp.01B023830.1	Npp.01C019380.1	-
Npp.01A024040.1	Npp.01A024040.1|Npp.01A024070.1	-	-	Npp.01D010910.1
Npp.01A024050.1	Npp.01A024050.1	Npp.01B023870.1	Npp.01C019400.1	Npp.01D010920.1|Npp.06D010240.1
Npp.01A024060.1	Npp.01A024060.1	-	-	Npp.01D010900.1
Npp.01A024090.1	Npp.01A024090.1	-	-	Npp.01D010940.1
Npp.01A024110.1	Npp.01A024110.1	-	Npp.01C019450.1	Npp.01D010970.1
Npp.01A024120.1	Npp.01A024120.1|Npp.01A024200.1	-	Npp.01C019460.1	Npp.01D010980.1
Npp.01A024140.1	Npp.01A024140.1	Npp.01B023860.1	Npp.01C019390.1	Npp.01D010870.1
Npp.01A024150.1	Npp.01A024150.1	Npp.01B023880.1	-	Npp.01D010880.1
Npp.01A024170.1	Npp.01A024170.1	-	Npp.01C019420.1	Npp.01D010950.1
Npp.01A024180.1	Npp.01A024180.1|Npp.01A024100.1	-	Npp.01C019430.1	Npp.01D010960.1
Npp.01A024190.1	Npp.01A024190.1	Npp.01B024240.1	-	-
Npp.01A024210.1	Npp.01A024210.1|Npp.01A024130.1	Npp.01B023980.1	Npp.01C019470.1|Npp.04C020460.1	Npp.01D010990.1
Npp.01A024220.1	Npp.01A024220.1	Npp.01B023970.1	Npp.01C005660.1	Npp.01D011000.1
Npp.01A024230.1	Npp.01A024230.1|Npp.01A045840.1	Npp.01B023930.1|Npp.01B006720.1|Npp.01B023960.1	Npp.01C042940.1|Npp.01C019480.1	Npp.01D011050.1|Npp.01D011030.1|Npp.01D036320.1
Npp.01A024240.1	Npp.01A024240.1	Npp.01B023920.1	Npp.01C019490.1	Npp.01D011090.1|Npp.01D011080.1
Npp.01A024250.1	Npp.01A024250.1	Npp.01B023890.1	-	-
Npp.01A024260.1	Npp.01A024260.1	-	Npp.01C024660.1	Npp.01D011070.1
Npp.01A024270.1	Npp.01A024270.1|Npp.01A024280.1	Npp.01B024000.1|Npp.01B024010.1|Npp.01B023990.1	Npp.01C019580.1|Npp.06C012060.1	Npp.01D011100.1
Npp.01A024290.1	Npp.01A024290.1	Npp.01B024030.1	Npp.01C019540.1	Npp.01D011120.1
Npp.01A024300.1	Npp.01A024300.1	Npp.01B024020.1	Npp.01C019550.1	Npp.01D011130.1
Npp.01A024310.1	Npp.01A024310.1	Npp.01B024040.1	Npp.01C019560.1	Npp.01D011140.1
Npp.01A024320.1	Npp.01A024320.1	Npp.01B024050.1	Npp.01C019590.1	Npp.01D011180.1
Npp.01A024330.1	Npp.01A024330.1	Npp.01B024060.1|Npp.01B006800.1	Npp.01C043000.1	Npp.01D011190.1|Npp.01D036400.1|Npp.01D011210.1
Npp.01A024340.1	Npp.01A024340.1	Npp.01B024070.1|Npp.01B006820.1	Npp.01C043010.1|Npp.05C008090.1	Npp.01D011200.1|Npp.01D036410.1
Npp.01A024350.1	Npp.01A024350.1	Npp.01B024080.1	-	Npp.01D011230.1
Npp.01A024360.1	Npp.01A024360.1	Npp.01B024100.1	Npp.01C019600.1	Npp.01D011240.1
Npp.01A024380.1	Npp.01A024380.1	Npp.01B024120.1	Npp.01C019620.1	Npp.01D011260.1
Npp.01A024390.1	Npp.01A024390.1	Npp.01B024140.1	Npp.01C019630.1	Npp.01D011270.1|Npp.01D011310.1
Npp.01A024400.1	Npp.01A024400.1|Npp.02A012700.1	-	Npp.01C019640.1	Npp.01D011300.1
Npp.01A024410.1	Npp.01A024410.1	Npp.01B024150.1	Npp.01C019650.1	Npp.01D011290.1
Npp.01A024420.1	Npp.01A024420.1	Npp.01B024180.1	Npp.01C019680.1	Npp.01D011320.1
Npp.01A024430.1	Npp.01A024430.1	Npp.01B024190.1	Npp.01C019710.1	-
Npp.01A024440.1	Npp.01A024440.1	-	-	Npp.01D011380.1
Npp.01A024450.1	Npp.01A024450.1	-	Npp.01C019690.1	Npp.01D011350.1
Npp.01A024460.1	Npp.01A024460.1	Npp.01B024200.1|Npp.07B012680.1	Npp.01C019720.1	Npp.01D011360.1|Npp.01D011330.1|Npp.01D011390.1|Npp.01D011370.1
Npp.01A024470.1	Npp.01A024470.1	Npp.01B024210.1	Npp.01C019730.1	Npp.01D011410.1
Npp.01A024480.1	Npp.01A024480.1	Npp.01B024250.1	-	-
Npp.01A024490.1	Npp.01A024490.1	Npp.01B024290.1	Npp.01C019760.1	Npp.01D011440.1
Npp.01A024500.1	Npp.01A024500.1	Npp.01B024300.1	Npp.01C019770.1	Npp.01D011450.1
Npp.01A024510.1	Npp.01A024510.1	-	-	-
Npp.01A024520.1	Npp.01A024520.1	Npp.01B024310.1	-	-
Npp.01A024530.1	Npp.01A024530.1	Npp.01B024320.1	-	-
Npp.01A024540.1	Npp.01A024540.1	Npp.01B024330.1|Npp.09B019360.1	Npp.04C005770.1	Npp.01D011460.1
Npp.01A024550.1	Npp.01A024550.1	-	Npp.01C019780.1	Npp.01D011470.1
Npp.01A024560.1	Npp.01A024560.1|Npp.03A015260.1	Npp.01B024340.1|Npp.05B020550.1	Npp.01C019800.1	Npp.01D011500.1
Npp.01A024570.1	Npp.01A024570.1|Npp.01A045900.1	Npp.01B024350.1|Npp.01B006600.1	Npp.01C042890.1|Npp.01C019820.1	Npp.01D011520.1|Npp.01D036270.1
Npp.01A024580.1	Npp.01A024580.1|Npp.04A000110.1	Npp.01B024360.1	-	Npp.01D011530.1
Npp.01A024590.1	Npp.01A024590.1|Npp.01A045910.1	Npp.01B024390.1|Npp.01B006610.1	Npp.01C042880.1	Npp.01D011580.1|Npp.01D036260.1|Npp.01D025840.1
Npp.01A024600.1	Npp.01A024600.1	Npp.01B024400.1	-	Npp.01D011570.1
Npp.01A024610.1	Npp.01A024610.1|Npp.04A000080.1	Npp.01B024410.1	Npp.01C019850.1	Npp.01D011560.1
Npp.01A024620.1	Npp.01A024620.1	Npp.01B024420.1	Npp.01C019840.1	Npp.01D011550.1
Npp.01A024640.1	Npp.01A024640.1|Npp.01A024670.1	Npp.01B024430.1	Npp.01C019830.1	Npp.01D011540.1|Npp.01D011800.1
Npp.01A024650.1	Npp.01A024650.1	Npp.01B024280.1	-	-
Npp.01A024660.1	Npp.01A024660.1	Npp.01B024270.1	Npp.01C019750.1	Npp.01D011430.1
Npp.01A024680.1	Npp.01A024680.1	Npp.01B024440.1|Npp.01B024700.1	-	Npp.01D011810.1
Npp.01A024690.1	Npp.01A024690.1	Npp.01B024450.1|Npp.01B024720.1|Npp.01B024730.1|Npp.01B024460.1	-	Npp.01D011820.1|Npp.08D016680.1
Npp.01A024700.1	Npp.01A024700.1	Npp.01B024470.1|Npp.01B024740.1	Npp.02C025720.1	Npp.01D011830.1
Npp.01A024710.1	Npp.01A024710.1	Npp.01B024480.1|Npp.01B024750.1	-	Npp.01D011840.1
Npp.01A024720.1	Npp.01A024720.1|Npp.01A046000.1|Npp.01A045820.1	Npp.01B024490.1|Npp.01B024760.1	Npp.06C021320.1	Npp.01D011850.1
Npp.01A024730.1	Npp.01A024730.1	Npp.01B024500.1|Npp.01B024770.1	-	Npp.01D011860.1
Npp.01A024740.1	Npp.01A024740.1	-	Npp.01C021170.1|Npp.01C021810.1	-
Npp.01A024750.1	Npp.01A024750.1	Npp.01B024780.1	-	Npp.01D011880.1
Npp.01A024760.1	Npp.01A024760.1	Npp.01B024530.1|Npp.01B024790.1	-	Npp.01D011890.1
Npp.01A024770.1	Npp.01A024770.1	Npp.01B024540.1|Npp.01B024800.1	-	Npp.01D011900.1
Npp.01A024780.1	Npp.01A024780.1	Npp.01B024560.1|Npp.01B024810.1	-	Npp.01D011920.1
Npp.01A024800.1	Npp.01A024800.1|Npp.01A024810.1	Npp.01B024570.1	-	Npp.01D011940.1
Npp.01A024820.1	Npp.01A024820.1	Npp.01B024580.1	-	Npp.01D011950.1
Npp.01A024830.1	Npp.01A024830.1	-	-	Npp.01D000270.1
Npp.01A024840.1	Npp.01A024840.1	Npp.01B024600.1|Npp.01B024860.1	-	Npp.01D011970.1
Npp.01A024850.1	Npp.01A024850.1	Npp.01B024610.1|Npp.01B024870.1	-	-
Npp.01A024860.1	Npp.01A024860.1	Npp.01B024620.1|Npp.01B024880.1	Npp.01C042400.1|Npp.01C042590.1|Npp.01C042610.1|Npp.01C042520.1	Npp.01D011980.1
Npp.01A024870.1	Npp.01A024870.1	Npp.01B024630.1|Npp.01B024890.1	-	Npp.01D011990.1
Npp.01A024880.1	Npp.01A024880.1	Npp.01B024640.1|Npp.01B024910.1	-	Npp.01D012010.1|Npp.09D000720.1
Npp.01A024890.1	Npp.01A024890.1	Npp.01B024650.1|Npp.01B024920.1	-	Npp.01D012020.1
Npp.01A024900.1	Npp.01A024900.1	Npp.01B024660.1|Npp.01B024930.1|Npp.01B048600.1	Npp.01C042390.1|Npp.01C042580.1|Npp.01C042530.1	Npp.01D012030.1
Npp.01A024910.1	Npp.01A024910.1	Npp.01B024670.1|Npp.01B024950.1	-	Npp.01D012040.1
Npp.01A024920.1	Npp.01A024920.1	Npp.01B024680.1|Npp.01B024960.1	-	Npp.01D012050.1
Npp.01A024930.1	Npp.01A024930.1	Npp.01B024970.1	-	-
Npp.01A024990.1	Npp.01A024990.1|Npp.01A025000.1|Npp.01A027020.1	-	Npp.01C022190.1	-
Npp.01A025030.1	Npp.01A025030.1|Npp.01A019820.1	-	-	-
Npp.01A025040.1	Npp.01A025040.1	-	-	Npp.01D012130.1
Npp.01A025110.1	Npp.01A025110.1	Npp.01B025250.1	Npp.08C007780.1	Npp.01D012310.1
Npp.01A025120.1	Npp.01A025120.1	Npp.01B025240.1	Npp.09C000010.1	Npp.01D012300.1
Npp.01A025130.1	Npp.01A025130.1	Npp.01B025590.1|Npp.01B025600.1	Npp.01C019910.1	Npp.01D012700.1
Npp.01A025140.1	Npp.01A025140.1	Npp.01B025540.1	Npp.01C019900.1	Npp.01D012690.1
Npp.01A025150.1	Npp.01A025150.1	-	Npp.01C019890.1	Npp.01D012680.1
Npp.01A025160.1	Npp.01A025160.1|Npp.04A017250.1	-	Npp.01C019880.1	Npp.01D012660.1
Npp.01A025170.1	Npp.01A025170.1	-	Npp.01C019870.1	Npp.01D012650.1
Npp.01A025180.1	Npp.01A025180.1|Npp.04A017230.1	-	Npp.01C019860.1	Npp.01D012640.1
[truncated: 33,832 more rows]
